# Supplementary material for: 1) Simulation of Melt Flow and Inclusion Flotation in Continuous Casting Tundishes (Miscellany)
Source: Hindawi journal article supplement (doi:10.1155/2021/6624184), 1995-12-01
Supplement: f1 [file 6624184.f1.pdf]

| Group | Group2 | SubMunicipi | Community  | Facility    | Interviewer | Date     | ID | Duration |
|-------|--------|-------------|------------|-------------|-------------|----------|----|----------|
| 2.00  | 1.00   | 7           | vunania    | vunania ch  | 7           | 8-Nov-17 | 1  | 26.00    |
| 2.00  | 0.00   | 4           | pungu      | pungu nort  | 4           | 8-Nov-17 | 2  | 30.00    |
| 1.00  | 0.00   | 7           | vunania    | vunania chc | 8           | 8-Nov-17 | 3  | 12.00    |
| 1.00  | 0.00   | 4           | biwui      | pungu nort  | 1           | 8-Nov-17 | 4  | 14.00    |
| 2.00  | 1.00   | 4           | pungu      | pungu s. Ch | 3           | 8-Nov-17 | 5  | 24.00    |
| 2.00  | 1.00   | 1           | Akurugu Da | KN CHC      | 4           | 9-Nov-17 | 6  | 24.00    |
| 1.00  | 0.00   | 1           | navrongo   | W. memori   | 4           | 8-Nov-17 | 6  | 15.00    |
| 1.00  | 0.00   | 1           | navrongo   | War memo    | 4           | 8-Nov-17 | 7  | 11.00    |
| 2.00  | 1.00   | 4           | pungu      | pungu sout  | 4           | 8-Nov-17 | 8  | 24.00    |
| 1.00  | 1.00   | 7           | vunania    | vunani CHC  | 7           | 8-Nov-17 | 9  | 24.00    |
| 1.00  | 0.00   | 7           | pungu      | pungu sout  | 4           | 8-Nov-17 | 10 | 10.00    |
| 2.00  | 1.00   | 4           | Telania    | pungu S. Ch | 3           | 8-Nov-17 | 11 | 24.00    |
| 1.00  | 0.00   | 4           | pungu      | pungu nort  | 3           | 8-Nov-17 | 12 | 15.00    |
| 1.00  | 0.00   | 4           | pungu      | pungu nort  | 4           | 8-Nov-17 | 13 | 24.00    |
| 2.00  | 1.00   | 4           | pungu      | pungu nort  | 4           | 8-Nov-17 | 14 | 24.00    |
| 1.00  | 0.00   | 4           | pungu      | pungu nort  | 4           | 8-Nov-17 | 15 | 11.00    |
| 2.00  | 1.00   | 4           | pungu      | pungu nort  | 4           | 8-Nov-17 | 16 | 24.00    |
| 1.00  | 1.00   | 4           | pungu      | pungu nort  | 3           | 8-Nov-17 | 17 | 12.00    |
| 1.00  | 0.00   | 4           | pungu      | pungu       | 4           | 9-Nov-17 | 18 | 16.00    |
| 2.00  | 1.00   | 4           | pungu      | pungu noel  | 3           | 8-Nov-17 | 19 | 24.00    |
| 2.00  | 1.00   | 4           | pungu      | pungu nort  | 3           | 8-Nov-17 | 20 | 26.00    |
| 1.00  | 0.00   | 4           | pungu      | pungu nort  | 3           | 8-Nov-17 | 21 | 8.00     |
| 2.00  | 1.00   | 4           | pungu      | pungu nort  | 3           | 8-Nov-17 | 22 | 27.00    |
| 1.00  | 0.00   | 1           | navrongo   | WMH         | 6           | 8-Nov-17 | 23 | 13.00    |
| 2.00  | 1.00   | 1           | vavrongo   | WMH         | 12          | 9-Nov-17 | 24 | 14.00    |
| 2.00  | 1.00   | 1           | akurugu da | KN CHC      | 4           | 9-Nov-17 | 25 | 25.00    |
| 2.00  | 1.00   | 1           | akurugu da | KN CHC      | 4           | 9-Nov-17 | 27 | 24.00    |
| 1.00  | 1.00   | 2           | akurud da  | akurug dab  | 3           | 9-Nov-17 | 28 | 10.00    |
| 2.00  | 1.00   | 2           | Akurugu da | KN CHc      | 2           | 9-Nov-17 | 29 | 36.00    |
| 1.00  | 1.00   | 2           | Ak dabo    | KNCHC       | 3           | 9-Nov-17 | 30 | 24.00    |
| 1.00  | 0.00   | 2           | Ak dabo    | KN Chc      | 9           | 9-Nov-17 | 31 | 12.00    |
| 2.00  | 0.00   | 2           | Ak bado    | KN CHC      | 9           | 9-Nov-19 | 32 | 15.00    |
| 2.00  | 1.00   | 2           | Ak Dabo    | KN CHC      | 9           | 9-Nov-17 | 33 | 27.00    |
| 2.00  | 0.00   | 2           | Ak dabo    | KNE CHC     | 3           | 9-Nov-17 | 34 | 25.00    |
| 1.00  | 0.00   | 2           | Ak dabo    | KNE cHC     | 3           | 9-Nov-17 | 35 | 13.00    |
| 1.00  | 0.00   | 7           | vunania    | vunania CH  | 8           | 9-Nov-17 | 36 | 8.00     |
| 2.00  | 0.00   | 7           | vunania    | vunania CH  | 8           | 9-Nov-17 | 37 | 29.00    |
| 1.00  | 0.00   | 7           | vunania    | vunania CH  | 8           | 9-Nov-17 | 38 | 14.00    |
| 1.00  | 0.00   | 7           | vunania    | vunania CH  | 8           | 9-Nov-17 | 39 | 11.00    |
| 1.00  | 0.00   | 7           | vunania    | vunania CH  | 8           | 9-Nov-17 | 40 | 12.00    |
| 2.00  | 1.00   | 7           | vunanai    | vunania CH  | 8           | 9-Nov-17 | 41 | 26.00    |
| 1.00  | 0.00   | 7           | vunania    | vunania CH  | 8           | 9-Nov-17 | 42 | 9.00     |
| 2.00  | 0.00   | 7           | vunania    | vunania ch  | 8           | 9-Nov-17 | 43 | 12.00    |
| 2.00  | 1.00   | 2           | AK Dabo    | KN CHC      | 4           | 9-Nov-17 | 44 | 24.00    |
| 2.00  | 1.00   | 2           | AK dabo    | KN CHC      | 9           | 9-Nov-17 | 45 | 30.00    |
| 2.00  | 1.00   | 2           | AK dabo    | KN CHC      | 4           | 9-Nov-17 | 46 | 24.00    |

|      |      |   |            |             |   |           |     |       |
|------|------|---|------------|-------------|---|-----------|-----|-------|
| 2.00 | 0.00 | 2 | Akrugu Dar | Akrugu Dat  | 9 | 9-Nov-17  | 46  | 30.00 |
| 1.00 | 1.00 | 2 | Ak dabo    | KN CHC      | 4 | 9-Nov-17  | 47  | 13.00 |
| 2.00 | 1.00 | 2 | Ah Dabo    | KN CHC      | 4 | 9-Nov-17  | 48  | 24.00 |
| 2.00 | 1.00 | 2 | Ak dabo    | KNC CHC     | 4 | 9-Nov-17  | 49  | 24.00 |
| 1.00 | 0.00 | 2 | Ak Dabo    | KN CHC      | 9 | 9-Nov-17  | 50  | 11.00 |
| 2.00 | 1.00 | 2 | Akrugu Dat | Akrugu Dat  | 3 | 9-Nov-17  | 53  | 24.00 |
| 1.00 | 0.00 | 3 | gumongo    | gumongo c   | 3 | 10-Nov-17 | 54  | 10.00 |
| 2.00 | 0.00 | 2 | natugnia   | natugnia cf | 4 | 10-Nov-17 | 81  | 12.00 |
| 2.00 | 1.00 | 3 | sabisi     | natugnia    | 4 | 10-Nov-17 | 82  | 25.00 |
| 1.00 | 0.00 | 3 | natugnia   | natugnia    | 4 | 10-Nov-17 | 83  | 13.00 |
| 1.00 | 0.00 | 3 | sabisi     | natugnia    | 4 | 10-Nov-17 | 84  | 14.00 |
| 2.00 | 0.00 | 3 | sabisi     | natugnia    | 3 | 10-Nov-17 | 85  | 13.00 |
| 2.00 | 1.00 | 3 | sabisi     | natugnia    | 4 | 10-Nov-17 | 86  | 26.00 |
| 2.00 | 0.00 | 3 | sabisi     | natugnia    | 2 | 10-Nov-17 | 87  | 30.00 |
| 1.00 | 0.00 | 3 | sabisi     | natugnia    | 3 | 10-Nov-17 | 88  | 7.00  |
| 2.00 | 0.00 | 3 | sabisi     | natugnia    | 3 | 10-Nov-17 | 89  | 27.00 |
| 1.00 | 0.00 | 3 | sabisi     | natugnia    | 3 | 10-Nov-17 | 90  | 11.00 |
| 2.00 | 0.00 | 3 | sabisi     | natugnia    | 3 | 10-Nov-17 | 91  | 24.00 |
| 2.00 | 1.00 | 3 | sabisi     | natugnia    | 3 | 10-Nov-17 | 92  | 26.00 |
| 1.00 | 0.00 | 3 | sabisi     | natugnia    | 3 | 10-Nov-17 | 93  | 15.00 |
| 2.00 | 0.00 | 3 | sabisi     | natugnia    | 6 | 10-Nov-17 | 94  | 26.00 |
| 2.00 | 0.00 | 3 | sabisi     | natugnia    | 6 | 10-Nov-17 | 95  | 24.00 |
| 1.00 | 0.00 | 3 | sabisi     | natugnia    | 6 | 10-Nov-17 | 96  | 12.00 |
| 2.00 | 1.00 | 3 | sabisi     | natugnia    | 6 | 10-Nov-17 | 97  | 24.00 |
| 1.00 | 0.00 | 3 | sabisi     | natugnia    | 6 | 10-Nov-17 | 98  | 10.00 |
| 1.00 | 0.00 | 2 | natugnia   | natugnia    | 4 | 10-Nov-17 | 99  | 14.00 |
| 2.00 | 0.00 | 2 | natugnia   | natugnia cf | 4 | 10-Nov-17 | 100 | 24.00 |
| 2.00 | 0.00 | 2 | natugnia   | natugnia cf | 4 | 10-Nov-17 | 101 | 21.00 |
| 1.00 | 0.00 | 2 | natugnia   | natugnia cf | 4 | 10-Nov-17 | 102 | 13.00 |
| 2.00 | 1.00 | 7 | gani       | vunania     | 7 | 10-Nov-17 | 103 | 18.00 |
| 1.00 | 0.00 | 7 | gani       | vunania     | 7 | 10-Nov-17 | 104 | 12.00 |
| 2.00 | 0.00 | 7 | gani       | vunania     | 7 | 10-Nov-17 | 105 | 26.00 |
| 1.00 | 0.00 | 7 | gani       | vunania     | 7 | 10-Nov-17 | 106 | 13.00 |
| 2.00 | 1.00 | 7 | gani       | vunania     | 7 | 10-Nov-17 | 107 | 28.00 |
| 2.00 | 1.00 | 7 | gani       | vunania     | 7 | 10-Nov-17 | 108 | 30.00 |
| 1.00 | 0.00 | 7 | gani       | vunania     | 7 | 10-Nov-17 | 109 | 10.00 |
| 2.00 | 0.00 | 7 | gani       | vunania     | 7 | 10-Nov-17 | 110 | 24.00 |
| 2.00 | 1.00 | 7 | vunania    | vunania ch  | 7 | 10-Nov-17 | 111 | 24.00 |
| 1.00 | 0.00 | 2 | natugnia   | natiugnia c | 4 | 10-Nov-17 | 112 | 12.00 |
| 2.00 | 0.00 | 2 | natugnia n | natugnia cf | 4 | 10-Nov-17 | 113 | 24.00 |
| 2.00 | 1.00 | 2 | natugnia   | natugnia cf | 4 | 10-Nov-17 | 114 | 24.00 |
| 1.00 | 0.00 | 2 | natugnia   | natugnia cf | 4 | 10-Nov-17 | 115 | 13.00 |
| 2.00 | 1.00 | 2 | natugnia   | natugnia cf | 4 | 10-Nov-17 | 116 | 24.00 |
| 1.00 | 0.00 | 2 | natugnia   | natugnia cf | 4 | 10-Nov-17 | 117 | 9.00  |
| 2.00 | 1.00 | 2 | natugnia   | natugnia cf | 4 | 10-Nov-17 | 118 | 24.00 |
| 1.00 | 0.00 | 2 | natugnia   | natugnia cf | 4 | 10-Nov-17 | 119 | 31.00 |
| 1.00 | 0.00 | 3 | natugnia   | natugnia cf | 5 | 10-Nov-17 | 120 | 14.00 |

|      |      |             |             |             |     |       |
|------|------|-------------|-------------|-------------|-----|-------|
| 2.00 | 1.00 | 3 natugnia  | natugnia cf | 5 10-Nov-17 | 121 | 20.00 |
| 1.00 | 0.00 | 3 natugnia  | natugnia cf | 5 #NULL!    | 122 | 7.00  |
| 2.00 | 1.00 | 3 Natugnia  | Natugnia C  | 5 10-Nov-17 | 123 | 25.00 |
| 1.00 | 0.00 | 3 Sabisi    | Natugnia    | 4 10-Nov-17 | 124 | 11.00 |
| 2.00 | 0.00 | 3 Sabisi    | Natugnia    | 4 10-Nov-17 | 124 | 24.00 |
| 1.00 | 0.00 | 3 sabisi    | Natugnia    | 4 10-Nov-17 | 125 | 12.00 |
| 2.00 | 1.00 | 3 Sabisi    | Natugnia C  | 4 10-Nov-17 | 126 | 30.00 |
| 1.00 | 0.00 | 3 Sabisi    | Natugnia C  | 4 10-Nov-17 | 127 | 7.00  |
| 2.00 | 1.00 | 3 Sabisi    | Natugnia C  | 4 10-Nov-17 | 128 | 24.00 |
| 1.00 | 0.00 | 3 Sabisi    | Natugnia C  | 4 10-Nov-17 | 129 | 24.00 |
| 2.00 | 1.00 | 3 Sabisi    | Natugnia C  | 4 10-Nov-17 | 130 | 30.00 |
| 1.00 | 0.00 | 3 Sabisi    | Natugnia C  | 4 10-Nov-17 | 131 | 11.00 |
| 2.00 | 1.00 | 3 Sabisi    | Natugnia C  | 4 10-Nov-17 | 132 | 30.00 |
| 2.00 | 1.00 | 3 Sabisi    | Natugnia C  | 4 10-Nov-17 | 133 | 28.00 |
| 2.00 | 1.00 | 3 Gumongo   | Gumongo (   | 5 10-Nov-17 | 134 | 26.00 |
| 1.00 | 0.00 | 3 Gumongo   | Gumongo (   | 5 10-Nov-17 | 135 | 10.00 |
| 1.00 | 0.00 | 3 Gumongo   | Gumongo (   | 3 10-Nov-17 | 136 | 8.00  |
| 1.00 | 0.00 | 3 Sabisi    | Natugnia C  | 5 10-Nov-17 | 137 | 13.00 |
| 2.00 | 1.00 | 3 Sabisi    | Natugnia C  | 5 10-Nov-17 | 138 | 24.00 |
| 1.00 | 0.00 | 3 Sabisi    | Natugnia C  | 5 10-Nov-17 | 139 | 10.00 |
| 2.00 | 0.00 | 3 Gumongo   | Gumongo (   | 2 10-Nov-17 | 140 | 24.00 |
| 2.00 | 1.00 | 3 Gumongo   | Gumongo (   | 3 10-Nov-17 | 141 | 24.00 |
| 1.00 | 0.00 | 3 Gumongo   | Gumongo (   | 3 10-Nov-17 | 142 | 12.00 |
| 2.00 | 1.00 | 3 Gumongo   | Gumongo (   | 2 10-Nov-17 | 143 | 25.00 |
| 2.00 | 1.00 | 3 Natugnia  | Natugnia C  | 5 10-Nov-17 | 144 | 34.00 |
| 1.00 | 0.00 | 3 Sabisi    | Natugnia C  | 5 10-Nov-17 | 145 | 11.00 |
| 2.00 | 0.00 | 3 Sabisi    | Natugnia C  | 5 10-Nov-17 | 146 | 17.00 |
| 2.00 | 0.00 | 3 Sabisi    | Natugnia C  | 5 10-Nov-17 | 147 | 30.00 |
| 1.00 | 0.00 | 3 Sabisi    | Natugnia C  | 5 10-Nov-17 | 148 | 14.00 |
| 2.00 | 1.00 | 3 Sabisi    | Natugnia C  | 5 10-Nov-17 | 149 | 24.00 |
| 1.00 | 0.00 | 3 Sabisi    | Natugnia C  | 5 10-Nov-17 | 150 | 9.00  |
| 1.00 | 0.00 | 3 Natugnia  | Natugnia C  | 5 10-Nov-17 | 151 | 14.00 |
| 2.00 | 1.00 | 3 Sabisi    | NatugniaCf  | 5 10-Nov-17 | 152 | 30.00 |
| 1.00 | 0.00 | 3 Sabisi    | Natugnia C  | 5 10-Nov-17 | 153 | 12.00 |
| 2.00 | 1.00 | 3 Natugnia  | Natugnia C  | 4 10-Nov-17 | 154 | 24.00 |
| 1.00 | 0.00 | 3 Natugnia  | Natugnia C  | 5 10-Nov-17 | 155 | 27.00 |
| 1.00 | 0.00 | 3 Natugnia  | Natugnia C  | 5 10-Nov-17 | 156 | 12.00 |
| 2.00 | 1.00 | 3 Natugnia  | Natugnia C  | 5 10-Nov-17 | 157 | 24.00 |
| 1.00 | 0.00 | 3 Natugnia  | Natugnia C  | 5 10-Nov-17 | 158 | 13.00 |
| 2.00 | 0.00 | 3 Natugnia  | Natugnia C  | 5 10-Nov-17 | 159 | 24.00 |
| 1.00 | 0.00 | 3 Natugnia  | Natugnia C  | 5 10-Nov-17 | 160 | 7.00  |
| 2.00 | 1.00 | 3 Natugnia  | Natugnia C  | 5 10-Nov-17 | 161 | 24.00 |
| 1.00 | 0.00 | 3 Natugnia  | Natugnia C  | 4 10-Nov-17 | 162 | 16.00 |
| 1.00 | 0.00 | 3 Natugnia  | Natugnia C  | 4 10-Nov-17 | 163 | 14.00 |
| 2.00 | 0.00 | 3 Natugniia | Natugnia C  | 4 10-Nov-17 | 164 | 24.00 |
| 1.00 | 0.00 | 3 Natugnia  | Natugnia C  | 4 10-Nov-17 | 165 | 12.00 |
| 1.00 | 0.00 | 3 Natugnia  | Natugnia C  | 4 10-Nov-17 | 166 | 10.00 |

|      |      |            |            |           |           |           |       |       |
|------|------|------------|------------|-----------|-----------|-----------|-------|-------|
| 2.00 | 1.00 | 3 Natugnia | Natugnia C | 4         | 10-Nov-17 | 167       | 24.00 |       |
| 1.00 | 0.00 | 1 Namolo   | NHC        | 11        | 10-Nov-17 | 168       | 11.00 |       |
| 2.00 | 0.00 | 1 namolo   | NHC        | 11        | 10-Nov-17 | 169       | 25.00 |       |
| 2.00 | 0.00 | 1 namolo   | NHC        | 11        | 10-Nov-17 | 170       | 18.00 |       |
| 1.00 | 1.00 | 1 namolo   | NHC        | 11        | 10-Nov-17 | 171       | 12.00 |       |
| 1.00 | 0.00 | 1 namolo   | NHC        | 11        | 10-Nov-17 | 172       | 15.00 |       |
| 1.00 | 0.00 | 1 namolo   | NHC        | 11        | 10-Nov-17 | 173       | 16.00 |       |
| 1.00 | 1.00 | 1 namolo   | NHC        | 10        | 10-Nov-17 | 174       | 12.00 |       |
| 1.00 | 0.00 | 1 namolo   | NHC        | 10        | 10-Nov-17 | 175       | 6.00  |       |
| 2.00 | 0.00 | 1 namolo   | NHC        | 10        | 10-Nov-17 | 176       | 24.00 |       |
| 1.00 | 0.00 | 1 namolo   | NHC        | 10        | 10-Nov-17 | 177       | 15.00 |       |
| 2.00 | 1.00 | 1 namolo   | NHC        | 10        | 10-Nov-17 | 178       | 24.00 |       |
| 2.00 | 0.00 | 1 namolo   | NHC        | 10        | 10-Nov-17 | 179       | 20.00 |       |
| 1.00 | 0.00 | 7 vunania  | Vunania Cf | 7         | 10-Nov-17 | 180       | 9.00  |       |
| 2.00 | 1.00 | 7 gaani    | Vunania Cf | 7         | 10-Nov-17 | 181       | 29.00 |       |
| 1.00 | 0.00 | 7 vunania  | Vunania Cf | 7         | 10-Nov-17 | 182       | 24.00 |       |
| 2.00 | 0.00 | 7 gaani    | Vunania Cf | 7         | 10-Nov-17 | 183       | 26.00 |       |
| 1.00 | 0.00 | 7 gaani    | Vunania Cf | 7         | 10-Nov-17 | 184       | 12.00 |       |
| 2.00 | 1.00 | 7 Gaani    | Vunania Cf | 7         | 10-Nov-17 | 185       | 18.00 |       |
| 1.00 | 0.00 | 7 Gaani    | Vunania Cf | 7         | 10-Nov-17 | 186       | 11.00 |       |
| 2.00 | 0.00 | 7 Gaani    | Vunania Cf | 7         | 10-Nov-17 | 187       | 24.00 |       |
| 1.00 | 0.00 | 7 Gaani    | Vunania    | 7         | 10-Nov-17 | 188       | 10.00 |       |
| 1.00 | 0.00 | 7 Gaani    | Vunania Cf | 7         | 10-Nov-17 | 189       | 14.00 |       |
| 2.00 | 1.00 | 7 Gaani    | Vunania Cf | 7         | 10-Nov-17 | 190       | 26.00 |       |
| 2.00 | 1.00 | 7 Gaani    | Vunania Cf | 7         | 10-Nov-17 | 191       | 36.00 |       |
| 1.00 | 0.00 | 7 Gaani    | Vunania Cf | 7         | 10-Nov-17 | 192       | 13.00 |       |
| 2.00 | 1.00 | 7 Gaani    | Vunania Cf | 7         | 10-Nov-17 | 193       | 27.00 |       |
| 1.00 | 0.00 | 7 Gaani    | Vunania Cf | 7         | 10-Nov-17 | 194       | 14.00 |       |
| 2.00 | 1.00 | 7 Gaani    | Vunania Cf | 7         | 10-Nov-17 | 195       | 24.00 |       |
| 1.00 | 0.00 | 3 Gumongo  | Gumongo (  | 2         | 10-Nov-17 | 196       | 11.00 |       |
| 2.00 | 1.00 | 3 Gumongo  | Gumongo (  | 3         | 10-Nov-17 | 197       | 28.00 |       |
| 1.00 | 0.00 | 3 Gumongo  | Gumongo (  | 3         | 10-Nov-17 | 198       | 12.00 |       |
| 2.00 | 1.00 | 3 Gumongo  | Gumongo (  | 3         | 10-Nov-17 | 199       | 28.00 |       |
| 2.00 | 1.00 | 3 Gumongo  | Gumongo (  | 2         | 10-Nov-17 | 200       | 24.00 |       |
| 1.00 | 0.00 | 3 Gumongo  | Gumongo (  | 3         | 10-Nov-17 | 201       | 14.00 |       |
| 1.00 | 0.00 | 3 Gumongo  | Gumongo (  | 3         | 10-Nov-17 | 202       | 24.00 |       |
| 1.00 | 0.00 | 3 Gumongo  | Gumongo (  | 3         | 10-Nov-17 | 203       | 9.00  |       |
| 2.00 | 0.00 | 3 Gumongo  | Gumongo (  | 3         | 10-Nov-17 | 204       | 18.00 |       |
| 1.00 | 0.00 | 3 Gumongo  | Gumongo (  | 3         | 10-Nov-17 | 206       | 15.00 |       |
| 2.00 | 1.00 | 3 Gumongo  | Gumongo (  | 2         | 10-Nov-17 | 207       | 24.00 |       |
| 1.00 | 0.00 | 3 Gumongo  | Gumongo (  | 2         | 10-Nov-17 | 208       | 14.00 |       |
| 2.00 | 0.00 | 3 Gumongo  | Gumongo (  | 2         | 10-Nov-17 | 209       | 24.00 |       |
| 1.00 | 0.00 | 3 Gumongo  | Gumongo (  | 2         | 10-Nov-17 | 210       | 8.00  |       |
| 1.00 | 0.00 | 3 Gumongo  | Gumongo    | 2         | 10-Nov-17 | 211       | 11.00 |       |
| 2.00 | 1.00 | #NULL!     | Gumongo    | Gumongo ( | 2         | 10-Nov-17 | 212   | 36.00 |
| 2.00 | 0.00 | 3 Gumongo  | Gumongo (  | 3         | 10-Nov-17 | 213       | 28.00 |       |
| 1.00 | 0.00 | 3 Gumongo  | Gumongo (  | 3         | 10-Nov-17 | 214       | 11.00 |       |

|      |      |   |          |            |    |           |     |       |
|------|------|---|----------|------------|----|-----------|-----|-------|
| 2.00 | 0.00 | 3 | Gumongo  | Gumongo C  | 4  | 10-Nov-17 | 215 | 24.00 |
| 1.00 | 0.00 | 7 | Janania  | Vunania Cl | 4  | 13-Nov-17 | 215 | 13.00 |
| 1.00 | 0.00 | 7 | Janania  | Vunania Cl | 4  | 13-Nov-17 | 216 | 10.00 |
| 1.00 | 0.00 | 7 | Janania  | Vunania Cl | 4  | 13-Nov-17 | 217 | 9.00  |
| 2.00 | 1.00 | 7 | Janania  | Vunania    | 4  | 13-Nov-17 | 218 | 24.00 |
| 2.00 | 0.00 | 7 | Janania  | Vunania    | 4  | 13-Nov-17 | 219 | 18.00 |
| 1.00 | 0.00 | 3 | Benyim   | Manyoro C  | 3  | 13-Nov-17 | 221 | 13.00 |
| 2.00 | 1.00 | 3 | Benyim   | Manyoro C  | 3  | 13-Nov-17 | 222 | 26.00 |
| 2.00 | 1.00 | 3 | Benyim   | Manyoro C  | 3  | 13-Nov-17 | 223 | 27.00 |
| 1.00 | 0.00 | 3 | Benyim   | Manyoro C  | 3  | 13-Nov-17 | 224 | 10.00 |
| 2.00 | 1.00 | 3 | Benyim   | Manyoro C  | 3  | 13-Nov-17 | 225 | 17.00 |
| 1.00 | 0.00 | 3 | Benyim   | Manyoro    | 3  | 13-Nov-17 | 226 | 12.00 |
| 2.00 | 1.00 | 3 | Benyim   | Manyoro C  | 3  | 13-Nov-17 | 227 | 24.00 |
| 1.00 | 0.00 | 3 | Benyim   | Manyoro C  | 3  | 13-Nov-17 | 228 | 12.00 |
| 2.00 | 0.00 | 3 | Benyim   | Manyoro C  | 3  | 13-Nov-17 | 229 | 24.00 |
| 2.00 | 1.00 | 3 | Benyim   | ManyoroCl  | 3  | 13-Nov-17 | 230 | 20.00 |
| 1.00 | 1.00 | 3 | manyoro  | Manyoro    | 3  | 13-Nov-17 | 231 | 13.00 |
| 2.00 | 1.00 | 5 | gia      | gia chc    | 9  | 14-Nov-17 | 232 | 24.00 |
| 1.00 | 1.00 | 3 | Kapalla  | MANYORO    | 2  | 13-Nov-17 | 244 | 12.00 |
| 2.00 | 1.00 | 7 | Janania  | Vunania ch | 6  | 13-Nov-17 | 245 | 26.00 |
| 2.00 | 1.00 | 3 | Sakonia  | Manyoro C  | 1  | 13-Nov-17 | 246 | 24.00 |
| 1.00 | 1.00 | 3 | Manyoro  | Manyoro C  | 3  | 13-Nov-17 | 247 | 15.00 |
| 2.00 | 1.00 | 3 | Sakonia  | Manyoro C  | 3  | 13-Nov-17 | 248 | 26.00 |
| 1.00 | 0.00 | 3 | Kupella  | Manyoro C  | 2  | 13-Nov-17 | 249 | 11.00 |
| 2.00 | 0.00 | 1 | Navrongo | Navrongo t | 10 | 13-Nov-17 | 250 | 18.00 |
| 1.00 | 0.00 | 1 | Navrongo | Navrongo t | 10 | 13-Nov-17 | 251 | 12.00 |
| 1.00 | 0.00 | 1 | Navrongo | Navrongo t | 10 | 13-Nov-17 | 252 | 10.00 |
| 2.00 | 1.00 | 1 | Navrongo | Navrongo t | 11 | 13-Nov-17 | 253 | 24.00 |
| 1.00 | 0.00 | 1 | Navrongo | Navrongo t | 11 | 13-Nov-17 | 254 | 11.00 |
| 2.00 | 1.00 | 1 | Navrongo | Navrongo t | 11 | 13-Nov-17 | 255 | 26.00 |
| 1.00 | 0.00 | 1 | Navrongo | Navrongo t | 10 | 16-Nov-17 | 256 | 14.00 |
| 2.00 | 1.00 | 1 | Navrongo | Navrongo t | 11 | 13-Nov-17 | 257 | 19.00 |
| 1.00 | 0.00 | 7 | Janania  | Vunania Cl | 9  | 13-Nov-17 | 258 | 26.00 |
| 1.00 | 0.00 | 7 | Jaanania | Vunania Cl | 9  | 13-Nov-17 | 259 | 10.00 |
| 2.00 | 1.00 | 7 | Jaanania | Vunania Cl | 5  | 13-Nov-17 | 260 | 24.00 |
| 1.00 | 0.00 | 7 | Jaanania | Vunania Cl | 5  | 13-Nov-17 | 261 | 13.00 |
| 2.00 | 1.00 | 7 | Jaanania | Vunania Cl | 4  | 13-Nov-17 | 262 | 16.00 |
| 2.00 | 1.00 | 3 | Dambisi  | Manyoro cl | 1  | 13-Nov-17 | 263 | 24.00 |
| 1.00 | 0.00 | 3 | Dambisi  | Manyoro C  | 3  | 13-Nov-17 | 264 | 12.00 |
| 1.00 | 0.00 | 3 | Dambisi  | Manyoro C  | 3  | 13-Nov-17 | 265 | 10.00 |
| 2.00 | 1.00 | 6 | zoongo   | zoongo chc | 6  | 16-Nov-17 | 266 | 29.00 |
| 1.00 | 0.00 | 3 | Dambisi  | Manyoro C  | 3  | 13-Nov-17 | 266 | 28.00 |
| 1.00 | 0.00 | 3 | Dambisi  | Manyoro C  | 3  | 13-Nov-17 | 267 | 14.00 |
| 2.00 | 1.00 | 3 | Dambisi  | Manyoro C  | 3  | 13-Nov-17 | 268 | 24.00 |
| 1.00 | 0.00 | 3 | Dambisi  | Manyoro C  | 3  | 13-Nov-17 | 269 | 11.00 |
| 2.00 | 1.00 | 3 | Gwari    | Manyoro C  | 1  | 13-Nov-17 | 270 | 16.00 |
| 2.00 | 1.00 | 3 | Wanjania | Manyoro C  | 1  | 13-Nov-17 | 271 | 37.00 |

|      |      |             |             |    |           |     |       |
|------|------|-------------|-------------|----|-----------|-----|-------|
| 1.00 | 0.00 | 3 Kupella   | Manyoro C   | 1  | 13-Nov-17 | 272 | 10.00 |
| 1.00 | 0.00 | 3 Dambisi   | Manyoro C   | 1  | 13-Nov-17 | 273 | 13.00 |
| 1.00 | 0.00 | 3 Wanjanja  | Manyoro cl  | 1  | 13-Nov-17 | 274 | 24.00 |
| 2.00 | 1.00 | 3 Manyoro   | Manyoro C   | 3  | 13-Nov-17 | 275 | 25.00 |
| 1.00 | 0.00 | 3 Dambisi   | Manyoro C   | 1  | 13-Nov-17 | 276 | 12.00 |
| 2.00 | 1.00 | 3 Wanjanja  | Manyoro cl  | 1  | 13-Nov-17 | 277 | 25.00 |
| 2.00 | 1.00 | 3 Kupela    | Manyoro     | 1  | 13-Nov-17 | 278 | 30.00 |
| 1.00 | 0.00 | 3 Benyim    | Manyoro C   | 1  | 13-Nov-17 | 279 | 12.00 |
| 2.00 | 1.00 | 3 Sakonia   | Manyoro C   | 3  | 13-Nov-17 | 280 | 26.00 |
| 1.00 | 0.00 | 1 Navrongo  | Navrongo t  | 10 | 13-Nov-17 | 281 | 12.00 |
| 2.00 | 1.00 | 1 Navrongo  | Navrongo t  | 10 | 13-Nov-17 | 282 | 24.00 |
| 1.00 | 0.00 | 1 Navrongo  | Navrongo t  | 10 | 13-Nov-17 | 283 | 9.00  |
| 2.00 | 1.00 | 1 Navrongo  | Navrongo t  | 10 | 13-Nov-17 | 284 | 19.00 |
| 1.00 | 0.00 | 3 Dambisi   | Manyoro C   | 1  | 13-Nov-17 | 285 | 10.00 |
| 1.00 | 0.00 | 3 Benyim    | Manyoro C   | 1  | 13-Nov-17 | 286 | 8.00  |
| 2.00 | 1.00 | 3 Wanjanja  | Manyoro C   | 1  | 13-Nov-17 | 287 | 24.00 |
| 1.00 | 0.00 | 3 Benyim Ma | Manyoro C   | 1  | 13-Nov-17 | 288 | 14.00 |
| 2.00 | 1.00 | 3 Kupela    | Manyoro C   | 1  | 13-Nov-17 | 289 | 36.00 |
| 1.00 | 0.00 | 3 Kupela    | Manyoro C   | 3  | 13-Nov-17 | 290 | 14.00 |
| 2.00 | 1.00 | 3 Kupela    | Manyoro C   | 3  | 13-Nov-17 | 291 | 36.00 |
| 1.00 | 0.00 | 3 Kupela    | Manyoro C   | 3  | 13-Nov-17 | 292 | 12.00 |
| 1.00 | 0.00 | 3 Wanjagnia | ManyoroCl   | 2  | 13-Nov-17 | 293 | 7.00  |
| 1.00 | 0.00 | 3 Kupela    | Manyoro C   | 2  | 13-Nov-17 | 294 | 24.00 |
| 2.00 | 1.00 | 3 Kupella   | Manyoro C   | 2  | 13-Nov-17 | 295 | 36.00 |
| 1.00 | 0.00 | 3 Dambisi   | Manyoro C   | 2  | 13-Nov-17 | 296 | 26.00 |
| 1.00 | 0.00 | 3 Wanjangni | Manyoro C   | 2  | 13-Nov-17 | 297 | 12.00 |
| 2.00 | 0.00 | 3 Wanjagnia | Manyoro C   | 2  | 13-Nov-17 | 298 | 24.00 |
| 1.00 | 0.00 | 3 Dambisi   | Manyoro C   | 2  | 13-Nov-17 | 299 | 6.00  |
| 2.00 | 1.00 | 6 zuo       | zuo chc     | 4  | 16-Nov-17 | 304 | 24.00 |
| 1.00 | 0.00 | 2 Doba      | Nayagnia C  | 2  | 14-Nov-17 | 305 | 16.00 |
| 2.00 | 0.00 | 3 sabisi    | natugnia    | 6  | 10-Nov-17 | 306 | 24.00 |
| 1.00 | 0.00 | 2 natugnia  | natugnia cl | 4  | 10-Nov-17 | 307 | 10.00 |
| 2.00 | 1.00 | 5 pindaa    | pindaa chc  | 8  | 16-Nov-17 | 308 | 24.00 |
| 1.00 | 1.00 | 5 Gia       | Gia CHC     | 4  | 14-Nov-17 | 309 | 30.00 |
| 1.00 | 0.00 | 3 Dambisi   | Manyoro C   | 1  | 14-Nov-17 | 311 | 12.00 |
| 1.00 | 0.00 | 2 Nayagnia  | Nayagnia C  | 2  | 14-Nov-17 | 313 | 13.00 |
| 2.00 | 1.00 | 3 Gumongo   | Gumongo C   | 3  | 14-Nov-17 | 314 | 30.00 |
| 1.00 | 0.00 | 5 Gia       | Gia CHC     | 5  | 14-Nov-17 | 315 | 2.00  |
| 1.00 | 0.00 | 5 Gia       | Gia CHC     | 4  | 14-Nov-17 | 316 | 8.00  |
| 2.00 | 1.00 | 2 Nayagnia  | Nayagnia C  | 3  | 14-Nov-17 | 317 | 24.00 |
| 2.00 | 0.00 | 1 Navrongo  | Navrongo t  | 10 | 14-Nov-17 | 318 | 22.00 |
| 1.00 | 0.00 | 1 Navrongo  | Navrongo t  | 11 | 14-Nov-17 | 319 | 9.00  |
| 2.00 | 1.00 | 2 Doba      | Nayagnia C  | 2  | 14-Nov-17 | 320 | 20.00 |
| 2.00 | 1.00 | 2 Nayagnia  | Nayagnia C  | 3  | 14-Nov-17 | 321 | 24.00 |
| 1.00 | 0.00 | 4 Punyoro   | Punyoro Cl  | 6  | 14-Nov-17 | 322 | 11.00 |
| 2.00 | 1.00 | 2 Nayagnia  | Nayagnia C  | 3  | 14-Nov-17 | 322 | 24.00 |
| 2.00 | 0.00 | 2 Nayagnia  | Nayagnia C  | 3  | 14-Nov-17 | 323 | 18.00 |

|      |      |   |           |             |    |           |     |       |
|------|------|---|-----------|-------------|----|-----------|-----|-------|
| 1.00 | 0.00 | 2 | Nayagnia  | Nayagnia C  | 3  | 14-Nov-17 | 324 | 18.00 |
| 2.00 | 1.00 | 2 | Nayagnia  | Nayagnia C  | 3  | 14-Nov-17 | 325 | 24.00 |
| 1.00 | 0.00 | 2 | Nayagnia  | Nayagnia C  | 3  | 14-Nov-17 | 326 | 13.00 |
| 2.00 | 0.00 | 2 | Nayagnia  | Nayagnia C  | 1  | 14-Nov-17 | 327 | 24.00 |
| 2.00 | 1.00 | 4 | Punyoro   | Punyoro Ct  | 6  | 14-Nov-17 | 328 | 24.00 |
| 1.00 | 0.00 | 4 | Punyoro   | Punyoro Ct  | 6  | 14-Nov-17 | 329 | 12.00 |
| 1.00 | 0.00 | 4 | Punyoro   | Punyoro Ct  | 6  | 14-Nov-17 | 330 | 13.00 |
| 2.00 | 1.00 | 4 | Punyoro   | Punyoro Ct  | 6  | 14-Nov-17 | 331 | 24.00 |
| 2.00 | 0.00 | 4 | Punyoro   | Punyoro Ct  | 6  | 14-Nov-17 | 332 | 24.00 |
| 2.00 | 1.00 | 4 | Punyoro   | Punyoro Ct  | 6  | 14-Nov-17 | 333 | 24.00 |
| 1.00 | 0.00 | 4 | punyoro   | Punyoro Ct  | 6  | 14-Nov-17 | 334 | 13.00 |
| 2.00 | 1.00 | 4 | Punyoro   | Punyoro Ct  | 6  | 14-Nov-17 | 335 | 24.00 |
| 1.00 | 1.00 | 4 | Punyoro   | Punyoro Ct  | 7  | 14-Nov-17 | 336 | 10.00 |
| 2.00 | 1.00 | 4 | Punyoro   | Punyoro Ct  | 7  | 14-Nov-17 | 337 | 24.00 |
| 1.00 | 0.00 | 4 | Punyoro   | Punyoro Ct  | 7  | 14-Nov-17 | 338 | 11.00 |
| 2.00 | 1.00 | 4 | Punyoro   | Punyoro Ct  | 7  | 14-Nov-17 | 339 | 24.00 |
| 2.00 | 1.00 | 4 | Punyoro   | Punyoro Ct  | 7  | 14-Nov-17 | 340 | 16.00 |
| 1.00 | 0.00 | 4 | Punyoro   | Punyoro Ct  | 8  | 14-Nov-17 | 341 | 14.00 |
| 2.00 | 1.00 | 4 | Punyoro   | Punyoro Ct  | 8  | 14-Nov-17 | 342 | 24.00 |
| 2.00 | 1.00 | 4 | Punyoro   | Punyoro Ct  | 8  | 14-Nov-17 | 343 | 24.00 |
| 1.00 | 0.00 | 4 | Punyoro   | Punyoro Ct  | 8  | 14-Nov-17 | 344 | 7.00  |
| 2.00 | 1.00 | 4 | Punyoro   | PunyoroCH   | 8  | 14-Nov-17 | 345 | 24.00 |
| 2.00 | 0.00 | 4 | Punyoro   | Punyoro Ct  | 8  | 14-Nov-17 | 346 | 18.00 |
| 1.00 | 0.00 | 4 | Punyoro   | Punyoro Ct  | 8  | 14-Nov-17 | 347 | 26.00 |
| 1.00 | 0.00 | 5 | Gia       | Gia CHC     | 4  | 14-Nov-17 | 348 | 14.00 |
| 2.00 | 0.00 | 5 | Gia       | Gia CHC     | 4  | 14-Nov-17 | 349 | 18.00 |
| 1.00 | 1.00 | 5 | Gia       | Gia CHC     | 8  | 14-Nov-17 | 350 | 27.00 |
| 2.00 | 1.00 | 5 | Gia       | Gia CHC     | 4  | 14-Nov-17 | 351 | 27.00 |
| 2.00 | 0.00 | 1 | Navrongo  | Navrongo t  | 10 | 14-Nov-17 | 352 | 12.00 |
| 2.00 | 0.00 | 1 | Navrongo  | Navrongo (  | 10 | 14-Nov-17 | 353 | 24.00 |
| 1.00 | 0.00 | 1 | Navrongo  | Navrongo (  | 10 | 14-Nov-17 | 354 | 14.00 |
| 1.00 | 0.00 | 1 | nogecenia | nhc         | 11 | 14-Nov-17 | 355 | 8.00  |
| 2.00 | 0.00 | 1 | nogecenia | nhc         | 10 | 14-Nov-17 | 356 | 18.00 |
| 2.00 | 1.00 | 1 | nogecenia | nhc         | 11 | 14-Nov-17 | 357 | 24.00 |
| 1.00 | 0.00 | 1 | nogecenia | nhc         | 10 | 14-Nov-17 | 358 | 12.00 |
| 2.00 | 1.00 | 2 | nayagnia  | nayagnia cl | 3  | 14-Nov-17 | 359 | 25.00 |
| 1.00 | 1.00 | 2 | nayagnia  | nayagnia cl | 1  | 14-Nov-17 | 360 | 25.00 |
| 1.00 | 1.00 | 2 | nayagnia  | nayagniach  | 1  | 14-Nov-17 | 361 | 13.00 |
| 1.00 | 0.00 | 2 | tankuna   | nayagnia cl | 2  | 14-Nov-17 | 362 | 18.00 |
| 2.00 | 1.00 | 2 | nayagnia  | nayagnia cl | 3  | 14-Nov-17 | 363 | 24.00 |
| 2.00 | 1.00 | 2 | barania   | nayagnia cl | 2  | 14-Nov-17 | 364 | 24.00 |
| 1.00 | 0.00 | 2 | nayagnia  | nayagnia cl | 3  | 14-Nov-17 | 365 | 9.00  |
| 2.00 | 1.00 | 2 | tankuna   | nayagnia cl | 2  | 14-Nov-17 | 366 | 24.00 |
| 1.00 | 1.00 | 5 | gia       | gia chc     | 4  | 14-Nov-17 | 367 | 16.00 |
| 2.00 | 1.00 | 5 | gia       | gia chc     | 5  | 14-Nov-17 | 368 | 12.00 |
| 1.00 | 0.00 | 5 | gia       | gia chc     | 9  | 14-Nov-17 | 369 | 15.00 |
| 1.00 | 0.00 | 5 | gia       | gia chc     | 5  | 14-Nov-17 | 370 | 12.00 |

|      |      |             |            |              |     |       |
|------|------|-------------|------------|--------------|-----|-------|
| 2.00 | 1.00 | 5 gia       | gia chc    | 5 14-Nov-17  | 371 | 24.00 |
| 1.00 | 0.00 | 5 gia       | gia chc    | 5 14-Nov-17  | 372 | 24.00 |
| 2.00 | 0.00 | 5 gia       | gia chc    | 4 14-Nov-17  | 373 | 24.00 |
| 2.00 | 1.00 | 5 gia       | gia chc    | 9 14-Nov-17  | 374 | 18.00 |
| 1.00 | 0.00 | 5 gia       | gia chc    | 4 14-Nov-17  | 375 | 12.00 |
| 2.00 | 1.00 | 5 gia       | gia chc    | 4 14-Nov-17  | 376 | 24.00 |
| 2.00 | 0.00 | 5 gia       | gia chc    | 9 14-Nov-17  | 377 | 24.00 |
| 1.00 | 0.00 | 5 gia       | gia chc    | 4 14-Nov-17  | 378 | 10.00 |
| 2.00 | 1.00 | 5 gia       | gia chc    | 4 14-Nov-17  | 379 | 24.00 |
| 1.00 | 1.00 | 5 gia       | gia chc    | 4 4-Nov-17   | 380 | 24.00 |
| 1.00 | 0.00 | 5 gia       | gia chc    | 4 14-Nov-17  | 381 | 12.00 |
| 2.00 | 1.00 | 5 gia       | gia chc    | 5 14-Nov-17  | 382 | 24.00 |
| 1.00 | 0.00 | 5 gia       | gia chc    | 9 14-Nov-17  | 383 | 15.00 |
| 1.00 | 0.00 | 5 gia       | gia chc    | 9 14-Nov-17  | 384 | 9.00  |
| 1.00 | 1.00 | 5 gia       | gia chc    | 5 14-Nov-17  | 385 | 24.00 |
| 2.00 | 0.00 | 5 gia       | gia chc    | 4 14-Nov-17  | 386 | 27.00 |
| 2.00 | 1.00 | 5 gia       | gia chc    | 4 14-Nov-17  | 387 | 26.00 |
| 1.00 | 1.00 | 5 gia       | gia chc    | 5 14-Nov-17  | 388 | 9.00  |
| 2.00 | 1.00 | 5 gia       | gia chc    | 5 14-Nov-17  | 389 | 24.00 |
| 2.00 | 1.00 | 5 gia       | gia chc    | 4 14-Nov-17  | 390 | 24.00 |
| 1.00 | 1.00 | 5 gia       | gia chc    | 4 14-Nov-17  | 391 | 11.00 |
| 2.00 | 0.00 | 1 Navrongo  | Navrongo C | 10 15-Nov-17 | 392 | 18.00 |
| 2.00 | 1.00 | 1 Navrongo  | Navrongo C | 11 15-Nov-17 | 393 | 24.00 |
| 1.00 | 0.00 | 1 Navrongo  | Navrongo   | 11 15-Nov-17 | 394 | 24.00 |
| 1.00 | 1.00 | 1 Navrongo  | Navrongo t | 11 15-Nov-17 | 395 | 12.00 |
| 2.00 | 1.00 | 1 Navrongo  | Navrongo t | 11 15-Nov-17 | 396 | 24.00 |
| 2.00 | 1.00 | 1 Navrongo  | Navrongo t | 10 15-Nov-17 | 397 | 22.00 |
| 1.00 | 0.00 | 1 Navrongo  | Navrongo t | 10 15-Nov-17 | 398 | 8.00  |
| 2.00 | 1.00 | 1 Navrongo  | Navrovgo t | 10 15-Nov-17 | 399 | 19.00 |
| 1.00 | 0.00 | 1 Navrongo  | Navrongo t | 11 15-Nov-17 | 400 | 7.00  |
| 1.00 | 1.00 | 1 Navrongo  | Navrongo t | 10 15-Nov-17 | 401 | 8.00  |
| 1.00 | 1.00 | 1 Navrongo  | Navrongo t | 10 15-Nov-17 | 402 | 9.00  |
| 2.00 | 0.00 | 1 Navrongo  | Navrongo t | 10 15-Nov-17 | 403 | 24.00 |
| 2.00 | 0.00 | 1 Navrongo  | Navrongo t | 10 15-Nov-70 | 404 | 17.00 |
| 2.00 | 1.00 | 1 Navrongo  | Navrongo t | 11 15-Nov-17 | 405 | 24.00 |
| 1.00 | 1.00 | 1 Navrongo  | Navrongo t | 10 15-Nov-17 | 406 | 12.00 |
| 1.00 | 0.00 | 1 Navrongo  | Navrongo t | 10 15-Nov-17 | 407 | 11.00 |
| 1.00 | 0.00 | 1 Navrongo  | Navrongo t | 11 15-Nov-17 | 408 | 12.00 |
| 1.00 | 0.00 | 1 Navrongoa | Navrongo t | 10 15-Nov-17 | 409 | 9.00  |
| 1.00 | 1.00 | 1 Navrongo  | Navrongo t | 10 14-Nov-17 | 410 | 10.00 |
| 2.00 | 1.00 | 1 Navrongo  | Navrongo t | 7 15-Nov-17  | 411 | 28.00 |
| 1.00 | 0.00 | 1 Navrongo  | Navrongo t | 10 15-Nov-17 | 412 | 8.00  |
| 2.00 | 1.00 | 1 Navrongo  | Navrongo t | 10 16-Nov-17 | 413 | 21.00 |
| 2.00 | 1.00 | 1 Navrongo  | Navrongo t | 10 16-Nov-17 | 414 | 24.00 |
| 1.00 | 0.00 | 1 Navrongo  | Navrongo n | 10 16-Nov-17 | 415 | 10.00 |
| 1.00 | 1.00 | 1 Navrongo  | Navrongo t | 11 16-Nov-17 | 416 | 14.00 |
| 1.00 | 1.00 | 1 Navrongo  | Navrongo t | 11 16-Nov-17 | 417 | 11.00 |



|      |      |            |             |              |     |       |
|------|------|------------|-------------|--------------|-----|-------|
| 2.00 | 1.00 | 1 Navrongo | Navrongo t  | 11 16-Nov-17 | 418 | 24.00 |
| 2.00 | 0.00 | 1 Navrongo | Navrongo t  | 11 16-Nov-17 | 419 | 18.00 |
| 1.00 | 0.00 | 1 Navrongo | navrongo t  | 11 16-Nov-17 | 420 | 14.00 |
| 2.00 | 0.00 | 1 Navrongo | Navrongo t  | 11 16-Nov-17 | 421 | 18.00 |
| 1.00 | 0.00 | 1 Navrongo | Navrongo t  | 10 16-Nov-17 | 422 | 13.00 |
| 2.00 | 1.00 | 1 Navrongo | Navrongo t  | 11 16-Nov-17 | 423 | 2.00  |
| 1.00 | 0.00 | 5 Pindia   | Pindia CHP: | 8 16-Nov-17  | 424 | 11.00 |
| 2.00 | 1.00 | 5 Pindia   | Pindia CHP: | 8 16-Nov-17  | 425 | 27.00 |
| 1.00 | 0.00 | 5 pindaa   | pindaa chc  | 8 16-Nov-17  | 426 | 36.00 |
| 2.00 | 1.00 | 5 pindaa   | pindaa chc  | 8 16-Nov-17  | 427 | 24.00 |
| 1.00 | 0.00 | 5 pindaa   | pindaa chc  | 8 16-Nov-17  | 428 | 8.00  |
| 2.00 | 1.00 | 5 pindaa   | pindaa chc  | 7 16-Nov-17  | 429 | 30.00 |
| 1.00 | 1.00 | 5 pindaa   | pindaa chc  | 9 16-Nov-17  | 430 | 16.00 |
| 2.00 | 0.00 | 6 zuo      | zuo chc     | 9 16-Nov-17  | 431 | 20.00 |
| 1.00 | 0.00 | 2 doba     | doba chc    | 3 16-Nov-17  | 432 | 13.00 |
| 2.00 | 0.00 | 2 doba     | doba chc    | 3 16-Nov-17  | 433 | 30.00 |
| 1.00 | 1.00 | 2 doba     | doba chc    | 3 16-Nov-17  | 434 | 12.00 |
| 1.00 | 1.00 | 2 doba     | doba chc    | 3 16-Nov-17  | 435 | 14.00 |
| 1.00 | 1.00 | 2 doba     | doba chc    | 3 16-Nov-17  | 436 | 9.00  |
| 2.00 | 0.00 | 2 doba     | doba chc    | 3 16-Nov-17  | 437 | 18.00 |
| 1.00 | 0.00 | 2 doba     | doba chc    | 3 16-Nov-17  | 438 | 12.00 |
| 2.00 | 1.00 | 2 doba     | doba chc    | 3 16-Nov-17  | 439 | 22.00 |
| 1.00 | 1.00 | 2 doba     | doba chc    | 3 16-Nov-17  | 440 | 12.00 |
| 1.00 | 0.00 | 2 doba     | doba chc    | 3 14-Nov-17  | 441 | 24.00 |
| 2.00 | 1.00 | 2 doba     | doba chc    | 3 16-Nov-17  | 442 | 25.00 |
| 1.00 | 0.00 | 2 doba     | doba chc    | 3 16-Nov-17  | 443 | 16.00 |
| 1.00 | 0.00 | 2 doba     | doba chc    | 3 16-Nov-17  | 444 | 10.00 |
| 1.00 | 0.00 | 2 doba     | doba chc    | 3 16-Nov-17  | 445 | 12.00 |
| 2.00 | 1.00 | 2 doba     | doba chc    | 3 16-Nov-17  | 446 | 18.00 |
| 2.00 | 1.00 | 2 doba     | doba chc    | 3 16-Nov-17  | 447 | 24.00 |
| 1.00 | 0.00 | 2 doba     | doba chc    | 3 16-Nov-17  | 448 | 36.00 |
| 1.00 | 1.00 | 2 doba     | doba chc    | 3 16-Nov-17  | 449 | 11.00 |
| 2.00 | 1.00 | 2 doba     | doba chc    | 3 16-Nov-17  | 450 | 18.00 |
| 2.00 | 0.00 | 2 doba     | doba chc    | 3 16-Nov-17  | 451 | 24.00 |
| 1.00 | 0.00 | 6 zuo      | zuo chc     | 6 16-Nov-17  | 452 | 12.00 |
| 1.00 | 0.00 | 6 zuo      | zuo chc     | 4 16-Nov-17  | 453 | 12.00 |
| 2.00 | 1.00 | 6 zuo      | zuo chc     | 9 16-Nov-17  | 454 | 24.00 |
| 1.00 | 0.00 | 6 zuo      | zuo chc     | 4 16-Nov-17  | 455 | 9.00  |
| 2.00 | 1.00 | 6 zuo      | zuo chc     | 4 16-Nov-17  | 456 | 24.00 |
| 1.00 | 0.00 | 6 zuo      | zuo chc     | 4 16-Nov-17  | 457 | 12.00 |
| 2.00 | 1.00 | 6 zuo      | zuo chc     | 4 16-Nov-17  | 458 | 18.00 |
| 1.00 | 0.00 | 6 zuo      | zuo chc     | 4 16-Nov-17  | 459 | 20.00 |
| 1.00 | 1.00 | 6 zuo      | zuo chc     | 4 16-Nov-17  | 460 | 11.00 |
| 2.00 | 1.00 | 6 zuo      | zuo chc     | 6 16-Nov-17  | 461 | 24.00 |
| 2.00 | 1.00 | 6 zoongo   | zoongo chc  | 5 16-Nov-17  | 462 | 24.00 |
| 1.00 | 0.00 | 6 zoongo   | zoongo chc  | 5 16-Nov-17  | 463 | 12.00 |
| 2.00 | 1.00 | 6 zoongo   | zoongo chc  | 6 16-Nov-17  | 464 | 28.00 |

|      |      |           |            |             |     |       |
|------|------|-----------|------------|-------------|-----|-------|
| 1.00 | 1.00 | 6 zoongo  | zoongo chc | 6 16-Nov-17 | 465 | 27.00 |
| 2.00 | 0.00 | 6 zoongo  | zoongo chc | 6 16-Nov-17 | 467 | 24.00 |
| 1.00 | 1.00 | 6 zoongo  | zoongo chc | 6 16-Nov-17 | 468 | 10.00 |
| 2.00 | 0.00 | 6 zoongo  | zoongo chc | 6 16-Nov-17 | 469 | 24.00 |
| 2.00 | 1.00 | 6 zoogo   | zoongo chc | 9 16-Nov-17 | 470 | 31.00 |
| 1.00 | 0.00 | 6 zoongo  | zoongo chc | 6 16-Nov-17 | 471 | 7.00  |
| 1.00 | 0.00 | 6 zoongo  | zoongo chc | 9 16-Nov-17 | 472 | 11.00 |
| 2.00 | 1.00 | 6 zoongo  | zoongo chc | 9 16-Nov-17 | 473 | 36.00 |
| 1.00 | 0.00 | 6 zoongo  | zoongo chc | 6 16-Nov-17 | 474 | 13.00 |
| 1.00 | 0.00 | 6 zoongo  | zoongo chc | 6 16-Nov-17 | 475 | 14.00 |
| 2.00 | 0.00 | 6 zoongo  | zoongo chc | 5 16-Nov-17 | 476 | 24.00 |
| 2.00 | 0.00 | 6 zoongo  | zoongo chc | 5 16-Nov-17 | 477 | 24.00 |
| 1.00 | 0.00 | 6 zoongo  | zoongo chc | 6 16-Nov-17 | 478 | 12.00 |
| 1.00 | 0.00 | 6 zoongo  | zoongo chc | 4 16-Nov-17 | 479 | 14.00 |
| 2.00 | 1.00 | 6 zoongo  | zoongo chc | 4 16-Nov-17 | 480 | 24.00 |
| 2.00 | 1.00 | 6 zuo     | zuo chc    | 4 16-Nov-17 | 481 | 20.00 |
| 2.00 | 1.00 | 6 zuo     | zuo chc    | 9 16-Nov-17 | 482 | 30.00 |
| 1.00 | 1.00 | 6 zuo chc | zuo chc    | 9 16-Nov-17 | 483 | 10.00 |
| 1.00 | 0.00 | 6 zuo     | zuo chc    | 9 16-Nov-17 | 484 | 24.00 |
| 2.00 | 1.00 | 6 zuo     | zuo chc    | 9 16-Nov-17 | 485 | 29.00 |
| 1.00 | 0.00 | 6 zuo     | zuo chc    | 9 16-Nov-17 | 486 | 12.00 |
| 2.00 | 1.00 | 6 zuo     | zuo chc    | 5 16-Nov-17 | 487 | 24.00 |
| 2.00 | 0.00 | 6 zuo     | zuo chc    | 6 16-Nov-17 | 488 | 36.00 |
| 1.00 | 0.00 | 6 zuo     | zuo chc    | 6 16-Nov-17 | 489 | 11.00 |
| 2.00 | 0.00 | 6 zuo     | zuo chc    | 6 16-Nov-17 | 490 | 25.00 |
| 2.00 | 0.00 | 6 zuo     | zuo chc    | 9 16-Nov-17 | 491 | 24.00 |
| 1.00 | 1.00 | 6 zuo     | zuo chc    | 4 16-Nov-17 | 492 | 10.00 |
| 2.00 | 1.00 | 6 zuo     | zuo chc    | 4 14-Nov-17 | 493 | 24.00 |
| 2.00 | 1.00 | 6 zuo     | zuo chc    | 4 16-Nov-17 | 494 | 24.00 |
| 1.00 | 0.00 | 6 zuo     | zuo chc    | 4 16-Nov-17 | 495 | 12.00 |
| 1.00 | 0.00 | 6 zuo     | zuo chc    | 4 16-Nov-17 | 496 | 9.00  |
| 2.00 | 1.00 | 6 zuo     | zuo chc    | 4 16-Nov-17 | 497 | 18.00 |
| 2.00 | 1.00 | 6 zuo     | zuo chc    | 4 16-Nov-17 | 498 | 24.00 |
| 1.00 | 0.00 | 6 zuo     | zuo chc    | 4 16-Nov-17 | 499 | 15.00 |
| 2.00 | 1.00 | 6 zuo     | zuo chc    | 4 16-Nov-17 | 500 | 24.00 |
| 2.00 | 1.00 | 6 zuo     | zuo chc    | 6 16-Nov-17 | 501 | 20.00 |
| 1.00 | 0.00 | 6 zuo     | zuo chc    | 6 16-Nov-17 | 502 | 25.00 |
| 2.00 | 1.00 | 6 zuo     | zuo chc    | 6 16-Nov-17 | 503 | 24.00 |
| 1.00 | 0.00 | 6 zuo     | zuo chc    | 6 16-Nov-17 | 504 | 11.00 |
| 2.00 | 1.00 | 6 zuo     | zuo chc    | 6 16-Nov-17 | 505 | 27.00 |
| 1.00 | 0.00 | 6 zuo     | zuo chc    | 6 16-Nov-17 | 506 | 24.00 |
| 1.00 | 0.00 | 6 zuo     | zuo chc    | 6 16-Nov-17 | 507 | 8.00  |
| 2.00 | 1.00 | 6 zuo     | zuo chc    | 9 16-Nov-17 | 508 | 24.00 |
| 1.00 | 0.00 | 6 zuo     | zuo chc    | 9 16-Nov-17 | 509 | 24.00 |
| 2.00 | 1.00 | 6 zuo     | zuo chc    | 9 16-Nov-17 | 510 | 24.00 |
| 1.00 | 0.00 | 6 zuo     | zuo chc    | 9 16-Nov-17 | 511 | 10.00 |
| 2.00 | 1.00 | 6 zuo     | zuo chc    | 9 16-Nov-17 | 512 | 30.00 |

|      |      |             |            |             |     |       |
|------|------|-------------|------------|-------------|-----|-------|
| 2.00 | 1.00 | 6 zuo       | zuo chc    | 9 16-Nov-17 | 513 | 26.00 |
| 1.00 | 0.00 | 6 zuo       | zuo chc    | 9 16-Nov-17 | 514 | 12.00 |
| 1.00 | 0.00 | 6 zuo       | zuo chc    | 9 16-Nov-17 | 515 | 11.00 |
| 2.00 | 0.00 | 6 zuo       | zuo chc    | 9 16-Nov-17 | 516 | 15.00 |
| 2.00 | 1.00 | 6 zuo       | zuo chc    | 9 16-Nov-17 | 517 | 36.00 |
| 1.00 | 0.00 | 6 zuo       | zuo chc    | 9 16-Nov-17 | 518 | 36.00 |
| 2.00 | 1.00 | 6 zuo       | zuo chc    | 9 16-Nov-17 | 519 | 25.00 |
| 1.00 | 0.00 | 6 zuo       | zuo chc    | 9 16-Nov-17 | 520 | 14.00 |
| 2.00 | 1.00 | 6 zuo       | zuo chc    | 9 16-Nov-17 | 521 | 24.00 |
| 1.00 | 1.00 | 6 zuo       | zuo chc    | 9 16-Nov-17 | 521 | 12.00 |
| 2.00 | 1.00 | 6 zuo       | zuo chc    | 9 16-Nov-17 | 523 | 48.00 |
| 2.00 | 0.00 | 6 zuo       | zuo chc    | 9 16-Nov-17 | 524 | 28.00 |
| 1.00 | 1.00 | 6 zuo       | zuo chc    | 9 16-Nov-17 | 525 | 13.00 |
| 2.00 | 1.00 | 6 zuo       | zuo chc    | 9 16-Nov-17 | 526 | 24.00 |
| 1.00 | 0.00 | 6 zuo       | zuo chc    | 4 16-Nov-17 | 527 | 13.00 |
| 2.00 | 1.00 | 6 zuo       | zuo chc    | 4 16-Nov-17 | 528 | 24.00 |
| 1.00 | 0.00 | 6 zuo       | zuo chc    | 4 16-Nov-17 | 529 | 11.00 |
| 2.00 | 1.00 | 6 zuo       | zuo chc    | 4 16-Nov-17 | 530 | 27.00 |
| 2.00 | 1.00 | 6 Zuo       | Zuo CHPS   | 4 16-Nov-17 | 531 | 24.00 |
| 1.00 | 1.00 | 6 Zuo       | Zuo CHPS   | 9 16-Nov-17 | 532 | 12.00 |
| 1.00 | 0.00 | 6 Zuo       | Zuo CHPS   | 9 16-Nov-17 | 533 | 13.00 |
| 2.00 | 1.00 | 6 ZUO       | ZUO CHPS   | 9 16-Nov-17 | 534 | 24.00 |
| 2.00 | 1.00 | 6 Zuo       | Zuo CHPS   | 4 16-Nov-17 | 535 | 20.00 |
| 1.00 | 0.00 | 6 Zuo       | Zuo CHPS   | 4 16-Nov-17 | 536 | 18.00 |
| 2.00 | 1.00 | 6 Zuo       | Zuo CHPS   | 4 16-Nov-17 | 537 | 24.00 |
| 1.00 | 0.00 | 1 Gongnia   | Gongnia H/ | 4 16-Nov-17 | 538 | 10.00 |
| 2.00 | 0.00 | 1 Gongnia   | Gongnia Ct | 9 17-Nov-17 | 539 | 24.00 |
| 1.00 | 0.00 | 1 Gongnia   | Gongian Ct | 9 17-Nov-17 | 540 | 11.00 |
| 1.00 | 1.00 | 1 Gongnia   | Gongnia Ct | 4 17-Nov-70 | 541 | 16.00 |
| 2.00 | 0.00 | 1 Nogsenia  | Hospital   | 7 17-Nov-17 | 542 | 22.00 |
| 2.00 | 0.00 | 1 Nosegnia  | Hospital   | 7 17-Nov-17 | 543 | 23.00 |
| 1.00 | 1.00 | 1 Nogsinia  | Hospital   | 7 17-Nov-17 | 544 | 13.00 |
| 2.00 | 1.00 | 1 hospital  | wmh        | 7 17-Nov-17 | 545 | 18.00 |
| 1.00 | 1.00 | 1 hospital  | hospital   | 7 17-Nov-17 | 546 | 18.00 |
| 1.00 | 0.00 | 1 hospital  | hospital   | 7 17-Nov-17 | 547 | 14.00 |
| 2.00 | 1.00 | 1 namolo    | nhc        | 3 17-Nov-17 | 548 | 24.00 |
| 2.00 | 1.00 | 1 namolo    | nhc        | 3 17-Nov-17 | 549 | 18.00 |
| 1.00 | 0.00 | 1 namolo    | nhc        | 2 17-Nov-17 | 550 | 12.00 |
| 2.00 | 1.00 | 1 namolo    | nch        | 3 17-Nov-17 | 551 | 24.00 |
| 1.00 | 0.00 | 1 namolo    | nch        | 2 17-Nov-17 | 552 | 7.00  |
| 2.00 | 1.00 | 1 namolo    | nch        | 3 17-Nov-17 | 553 | 16.00 |
| 1.00 | 0.00 | 1 namolo    | hospital   | 8 17-Nov-17 | 554 | 19.00 |
| 1.00 | 0.00 | 1 nogecenia | wmh        | 8 17-Nov-17 | 555 | 10.00 |
| 1.00 | 1.00 | 1 nogecenia | wmh        | 8 17-Nov-17 | 556 | 10.00 |
| 1.00 | 0.00 | 1 nogecenia | wmh        | 5 17-Nov-17 | 557 | 13.00 |
| 1.00 | 0.00 | 1 nogecenia | wmh        | 8 17-Nov-17 | 558 | 11.00 |
| 2.00 | 1.00 | 1 nogecenia | wmh        | 8 17-Nov-17 | 559 | 24.00 |

|      |      |                    |             |     |       |
|------|------|--------------------|-------------|-----|-------|
| 1.00 | 0.00 | 1 nogecenia wmh    | 8 17-Nov-17 | 560 | 13.00 |
| 2.00 | 0.00 | 1 nogesenia\ WMH   | 8 20-Nov-17 | 561 | 12.00 |
| 1.00 | 1.00 | 1 nogesenia WMH    | 8 20-Nov-17 | 562 | 11.00 |
| 2.00 | 1.00 | 1 nogesenia WMH    | 8 20-Nov-17 | 563 | 21.00 |
| 1.00 | 1.00 | 1 nogesenia WMH    | 8 20-Nov-17 | 564 | 14.00 |
| 2.00 | 1.00 | 1 nogesenia WMH    | 8 20-Nov-17 | 565 | 24.00 |
| 1.00 | 0.00 | 1 nogesenia WMH    | 7 20-Nov-17 | 566 | 12.00 |
| 2.00 | 1.00 | 1 nogesenia WMH    | 7 20-Nov-17 | 567 | 24.00 |
| 1.00 | 1.00 | 1 nogesenia WMH    | 7 20-Nov-17 | 568 | 9.00  |
| 2.00 | 1.00 | 1 nogesenia WMH    | 7 20-Nov-17 | 569 | 18.00 |
| 2.00 | 1.00 | 1 nogesenia WMH    | 8 20-Nov-17 | 570 | 24.00 |
| 1.00 | 0.00 | 1 nogesenia WMH    | 8 20-Nov-17 | 571 | 13.00 |
| 1.00 | 0.00 | 1 nogesenia WMH    | 8 20-Nov-17 | 26  | 11.00 |
| 2.00 | 1.00 | 3 Benyim Manyoro C | 3 13-Nov-17 | 223 | 27.00 |

| Duration2 | Sex | Birthwt | Age1 | Age2 | Alive | WEIGHTCU | HEIGHTCU | Estimateda |
|-----------|-----|---------|------|------|-------|----------|----------|------------|
| 2.00      | 2   | 3.50    | 21   | 68   | 1     | 12.90    | 88.0     | 68         |
| 2.00      | 2   | 2.90    | 11   | 42   | 1     | 9.10     | 72.2     | 42         |
| 1.00      | 2   | 3.60    | 13   | 21   | 1     | 10.40    | 86.5     | 21         |
| 1.00      | 1   | 2.90    | 8    | 23   | 1     | 7.50     | 70.3     | 23         |
| 2.00      | 1   | 3.20    | 2    | 63   | 1     | 5.20     | 59.6     | 63         |
| 2.00      | 1   | 3.00    | 6    | 52   | 1     | 8.90     | 70.0     | 52         |
| 1.00      | 2   | 3.50    | 12   | 20   | 1     | 8.90     | 78.9     | 20         |
| 1.00      | 2   | 3.30    | 13   | 23   | 1     | 8.20     | 74.0     | 23         |
| 2.00      | 1   | 3.50    | 4    | 76   | 1     | 7.40     | 65.5     | 76         |
| 2.00      | 1   | 3.40    | 7    | 22   | 1     | 7.20     | 68.0     | 22         |
| 1.00      | 1   | 2.40    | 4    | 20   | 1     | 7.10     | 61.5     | 20         |
| 2.00      | 1   | 3.60    | 4    | 42   | 1     | 8.30     | 68.2     | 42         |
| 1.00      | 1   | 2.60    | 5    | 24   | 1     | 7.40     | 64.2     | 24         |
| 2.00      | 1   | 2.50    | 8    | 23   | 1     | 6.90     | 67.9     | 23         |
| 2.00      | 1   | 2.10    | 3    | 98   | 1     | 4.10     | 54.9     | 98         |
| 1.00      | 2   | 2.50    | 5    | 21   | 1     | 6.20     | 64.1     | 21         |
| 2.00      | 1   | 2.60    | 6    | 43   | 1     | 8.20     | 64.6     | 43         |
| 1.00      | 2   | 4.00    | 11   | 23   | 1     | 6.60     | 62.8     | 23         |
| 1.00      | 1   | 2.70    | 3    | 24   | 1     | 6.70     | 59.2     | 24         |
| 2.00      | 1   | 3.00    | 3    | 87   | 1     | 6.70     | 61.2     | 87         |
| 2.00      | 2   | 2.70    | 5    | 81   | 1     | 7.30     | 66.0     | 81         |
| 1.00      | 2   | 2.80    | 8    | 22   | 1     | 7.50     | 66.0     | 22         |
| 2.00      | 1   | 2.80    | 8    | 72   | 1     | 9.70     | 73.3     | 72         |
| 1.00      | 1   | 2.90    | 12   | 22   | 1     | 8.90     | 83.7     | 22         |
| 1.00      | 2   | 2.50    | 19   | 72   | 1     | 9.30     | 75.0     | 72         |
| 2.00      | 2   | 3.00    | 7    | 87   | 1     | 7.30     | 62.2     | 87         |
| 2.00      | 2   | 3.30    | 4    | 48   | 1     | 7.30     | 65.3     | 48         |
| 1.00      | 1   | 3.20    | 9    | 24   | 1     | 9.00     | 76.4     | 24         |
| 2.00      | 1   | 3.50    | 13   | 96   | 1     | 10.50    | 79.9     | 96         |
| 2.00      | 2   | 3.10    | 8    | 20   | 1     | 9.70     | 71.7     | 20         |
| 1.00      | 1   | 2.90    | 8    | 21   | 1     | 7.70     | 69.4     | 21         |
| 1.00      | 1   | 2.70    | 7    | 48   | 1     | 8.20     | 67.9     | 24         |
| 2.00      | 1   | 2.70    | 11   | 72   | 1     | 9.40     | 74.8     | 72         |
| 2.00      | 1   | 2.40    | 11   | 39   | 1     | 8.00     | 65.4     | 39         |
| 1.00      | 2   | 2.90    | 11   | 23   | 1     | 9.30     | 68.3     | 23         |
| 1.00      | 1   | 2.80    | 6    | 19   | 1     | 9.20     | 70.4     | 19         |
| 2.00      | 1   | 2.60    | 20   | 45   | 1     | 13.50    | 78.0     | 45         |
| 1.00      | 2   | 2.50    | 18   | 39   | 1     | 10.90    | 78.0     | 39         |
| 1.00      | 1   | 3.00    | 11   | 21   | 1     | 7.50     | 73.0     | 21         |
| 1.00      | 1   | 2.60    | 10   | 23   | 1     | 8.00     | 76.0     | 23         |
| 2.00      | 1   | 2.90    | 24   | 71   | 1     | 12.00    | 87.0     | 71         |
| 1.00      | 1   | 2.30    | 12   | 19   | 1     | 9.50     | 74.2     | 19         |
| 1.00      | 1   | 1.70    | 12   | 42   | 1     | 9.30     | 75.0     | 42         |
| 2.00      | 2   | 3.20    | 23   | 72   | 1     | 9.90     | 75.9     | 72         |
| 2.00      | 1   | 2.80    | 24   | 64   | 1     | 12.00    | 84.3     | 64         |
| 2.00      | 1   | 3.10    | 13   | 48   | 1     | 12.00    | 84.3     | 48         |

|      |   |      |    |    |   |       |      |    |
|------|---|------|----|----|---|-------|------|----|
| 2.00 | 1 | 2.80 | 24 | 45 | 1 | 13.10 | 75.6 | 45 |
| 1.00 | 1 | 3.40 | 7  | 22 | 1 | 7.40  | 68.2 | 22 |
| 2.00 | 1 | 2.60 | 5  | 56 | 1 | 5.50  | 69.3 | 56 |
| 2.00 | 2 | 2.90 | 6  | 72 | 1 | 6.90  | 69.3 | 72 |
| 1.00 | 2 | 2.80 | 6  | 21 | 1 | 6.20  | 66.4 | 21 |
| 2.00 | 2 | 3.00 | 3  | 63 | 1 | 6.80  | 65.7 | 63 |
| 1.00 | 2 | 2.60 | 11 | 23 | 1 | 7.00  | 67.5 | 23 |
| 1.00 | 1 | 2.70 | 19 | 31 | 1 | 10.00 | 81.0 | 31 |
| 2.00 | 1 | 3.15 | 24 | 72 | 1 | 10.00 | 86.0 | 72 |
| 1.00 | 2 | 3.40 | 5  | 24 | 1 | 9.50  | 69.0 | 24 |
| 1.00 | 1 | 2.70 | 10 | 23 | 1 | 9.50  | 69.0 | 23 |
| 1.00 | 1 | 3.90 | 14 | 43 | 0 | 8.50  | 70.9 | 24 |
| 2.00 | 1 | 2.60 | 2  | 48 | 1 | 4.50  | 60.0 | 48 |
| 2.00 | 2 | 3.10 | 20 | 49 | 1 | 10.30 | 79.0 | 49 |
| 1.00 | 2 | 2.30 | 4  | 19 | 1 | 6.50  | 65.0 | 19 |
| 2.00 | 1 | 2.80 | 24 | 53 | 1 | 12.00 | 76.0 | 53 |
| 1.00 | 2 | 2.90 | 2  | 20 | 1 | 5.50  | 59.6 | 20 |
| 2.00 | 2 | 2.70 | 13 | 36 | 1 | 9.00  | 68.0 | 36 |
| 2.00 | 2 | 2.80 | 21 | 66 | 1 | 10.00 | 83.3 | 66 |
| 1.00 | 1 | 2.40 | 6  | 22 | 1 | 6.50  | 70.2 | 22 |
| 2.00 | 1 | 3.70 | 5  | 35 | 1 | 6.00  | 68.0 | 35 |
| 2.00 | 1 | 2.70 | 22 | 52 | 1 | 10.60 | 87.6 | 52 |
| 1.00 | 2 | 2.50 | 10 | 23 | 1 | 10.20 | 82.6 | 23 |
| 2.00 | 1 | 3.00 | 5  | 40 | 1 | 6.60  | 70.9 | 40 |
| 1.00 | 1 | 3.20 | 12 | 20 | 1 | 9.00  | 81.3 | 20 |
| 1.00 | 1 | 3.10 | 7  | 23 | 1 | 7.40  | 68.0 | 23 |
| 2.00 | 1 | 3.30 | 8  | 35 | 1 | 7.00  | 69.9 | 35 |
| 1.00 | 2 | 2.60 | 11 | 31 | 1 | 7.40  | 74.3 | 31 |
| 1.00 | 2 | 3.00 | 4  | 24 | 1 | 7.10  | 66.0 | 24 |
| 1.00 | 2 | 2.60 | 15 | 48 | 1 | 10.70 | 81.0 | 48 |
| 1.00 | 2 | 3.00 | 6  | 21 | 1 | 10.10 | 76.0 | 21 |
| 2.00 | 2 | 3.30 | 18 | 36 | 1 | 8.60  | 77.0 | 36 |
| 1.00 | 1 | 2.70 | 3  | 21 | 1 | 6.00  | 67.2 | 21 |
| 2.00 | 2 | 3.10 | 11 | 68 | 1 | 8.80  | 74.0 | 68 |
| 2.00 | 2 | 2.70 | 17 | 72 | 1 | 9.50  | 78.0 | 72 |
| 1.00 | 1 | 2.80 | 11 | 20 | 1 | 8.30  | 73.0 | 20 |
| 2.00 | 1 | 3.00 | 10 | 49 | 1 | 9.30  | 75.0 | 20 |
| 2.00 | 1 | 2.90 | 15 | 61 | 1 | 8.40  | 69.0 | 61 |
| 1.00 | 2 | 2.40 | 7  | 23 | 0 | 8.00  | 70.7 | 23 |
| 2.00 | 1 | 3.10 | 24 | 49 | 1 | 13.00 | 78.0 | 49 |
| 2.00 | 2 | 3.20 | 19 | 55 | 1 | 8.00  | 70.0 | 55 |
| 1.00 | 2 | 2.40 | 14 | 24 | 0 | 7.30  | 70.1 | 24 |
| 2.00 | 1 | 3.40 | 5  | 38 | 1 | 7.70  | 67.2 | 38 |
| 1.00 | 2 | 2.90 | 12 | 22 | 1 | 8.00  | 80.1 | 22 |
| 2.00 | 2 | 2.60 | 11 | 72 | 1 | 8.20  | 72.1 | 72 |
| 2.00 | 1 | 3.10 | 3  | 24 | 1 | 5.10  | 63.6 | 24 |
| 1.00 | 1 | 2.90 | 5  | 23 | 1 | 6.40  | 70.2 | 23 |

|      |   |      |    |    |   |       |      |    |
|------|---|------|----|----|---|-------|------|----|
| 1.00 | 1 | 2.90 | 23 | 57 | 1 | 9.00  | 81.3 | 57 |
| 1.00 | 2 | 3.60 | 8  | 22 | 1 | 8.00  | 74.2 | 22 |
| 2.00 | 1 | 2.90 | 5  | 48 | 1 | 5.90  | 69.0 | 48 |
| 1.00 | 1 | 2.50 | 3  | 19 | 1 | 6.70  | 65.6 | 19 |
| 2.00 | 1 | 2.50 | 17 | 48 | 1 | 8.70  | 69.6 | 48 |
| 1.00 | 2 | 2.80 | 6  | 23 | 1 | 6.00  | 64.1 | 23 |
| 2.00 | 2 | 2.80 | 12 | 60 | 1 | 8.30  | 73.0 | 60 |
| 1.00 | 1 | 2.60 | 4  | 19 | 1 | 8.30  | 72.5 | 19 |
| 2.00 | 1 | 3.30 | 10 | 67 | 1 | 7.50  | 66.2 | 67 |
| 2.00 | 2 | 2.60 | 12 | 23 | 1 | 8.20  | 78.9 | 23 |
| 2.00 | 1 | 3.00 | 9  | 48 | 1 | 7.80  | 71.3 | 48 |
| 1.00 | 1 | 3.00 | 3  | 20 | 1 | 7.80  | 71.2 | 20 |
| 2.00 | 1 | 3.30 | 19 | 72 | 1 | 9.60  | 85.5 | 72 |
| 2.00 | 2 | 3.00 | 8  | 46 | 1 | 8.40  | 73.0 | 46 |
| 2.00 | 2 | 3.10 | 24 | 72 | 1 | 14.00 | 90.3 | 72 |
| 1.00 | 2 | 2.90 | 4  | 19 | 1 | 6.90  | 66.3 | 19 |
| 1.00 | 2 | 2.90 | 4  | 24 | 1 | 5.50  | 60.0 | 24 |
| 1.00 | 2 | 3.30 | 4  | 22 | 1 | 6.80  | 68.0 | 22 |
| 2.00 | 1 | 2.70 | 16 | 60 | 1 | 9.00  | 81.2 | 60 |
| 1.00 | 2 | 2.70 | 3  | 18 | 1 | 5.30  | 55.9 | 18 |
| 2.00 | 1 | 1.90 | 20 | 38 | 1 | 11.40 | 76.8 | 38 |
| 2.00 | 2 | 2.60 | 24 | 62 | 1 | 9.30  | 70.3 | 62 |
| 1.00 | 1 | 3.20 | 3  | 22 | 1 | 5.20  | 63.4 | 22 |
| 2.00 | 2 | 2.90 | 23 | 59 | 1 | 12.10 | 88.5 | 59 |
| 2.00 | 2 | 2.60 | 23 | 65 | 1 | 10.00 | 85.1 | 65 |
| 1.00 | 2 | 3.10 | 5  | 24 | 1 | 6.40  | 65.4 | 24 |
| 1.00 | 2 | 2.30 | 5  | 34 | 1 | 6.10  | 66.1 | 34 |
| 2.00 | 2 | 3.70 | 11 | 36 | 1 | 9.70  | 77.6 | 36 |
| 1.00 | 1 | 3.30 | 4  | 22 | 1 | 6.10  | 60.8 | 22 |
| 2.00 | 1 | 2.50 | 19 | 60 | 1 | 9.50  | 74.2 | 60 |
| 1.00 | 2 | 2.60 | 7  | 23 | 1 | 9.00  | 70.0 | 23 |
| 1.00 | 2 | 3.00 | 3  | 23 | 1 | 6.00  | 61.2 | 23 |
| 2.00 | 2 | 3.00 | 2  | 40 | 1 | 4.80  | 59.2 | 40 |
| 1.00 | 1 | 3.30 | 5  | 24 | 1 | 7.80  | 73.0 | 24 |
| 2.00 | 1 | 3.30 | 19 | 87 | 1 | 10.10 | 76.1 | 87 |
| 2.00 | 1 | 3.00 | 6  | 21 | 1 | 6.80  | 68.6 | 21 |
| 1.00 | 1 | 3.20 | 2  | 23 | 0 | 6.00  | 61.5 | 23 |
| 2.00 | 1 | 2.40 | 17 | 57 | 1 | 9.40  | 80.0 | 57 |
| 1.00 | 2 | 3.00 | 8  | 21 | 1 | 6.90  | 69.6 | 21 |
| 2.00 | 2 | 2.70 | 16 | 48 | 1 | 8.00  | 78.0 | 48 |
| 1.00 | 1 | 3.20 | 6  | 22 | 1 | 7.20  | 72.0 | 22 |
| 2.00 | 2 | 3.00 | 10 | 48 | 1 | 10.00 | 75.3 | 48 |
| 1.00 | 1 | 3.40 | 3  | 24 | 1 | 7.90  | 58.8 | 24 |
| 1.00 | 2 | 2.90 | 11 | 23 | 1 | 7.50  | 72.1 | 23 |
| 2.00 | 2 | 2.80 | 7  | 39 | 1 | 7.00  | 70.4 | 39 |
| 1.00 | 2 | 2.60 | 8  | 23 | 1 | 6.40  | 65.0 | 23 |
| 1.00 | 1 | 2.70 | 6  | 18 | 1 | 5.40  | 65.5 | 18 |

|      |   |      |    |     |   |       |      |     |
|------|---|------|----|-----|---|-------|------|-----|
| 2.00 | 2 | 3.20 | 22 | 83  | 1 | 11.60 | 76.0 | 83  |
| 1.00 | 1 | 2.40 | 6  | 21  | 1 | 7.40  | 72.2 | 21  |
| 2.00 | 1 | 3.30 | 19 | 45  | 1 | 10.30 | 83.0 | 45  |
| 1.00 | 2 | 3.00 | 4  | 36  | 1 | 6.00  | 65.0 | 36  |
| 1.00 | 1 | 2.90 | 2  | 48  | 1 | 5.20  | 56.0 | 48  |
| 1.00 | 1 | 3.00 | 8  | 23  | 1 | 8.40  | 79.0 | 23  |
| 1.00 | 1 | 3.50 | 5  | 24  | 1 | 7.00  | 68.0 | 24  |
| 1.00 | 1 | 3.00 | 7  | 48  | 1 | 8.70  | 70.5 | 48  |
| 1.00 | 1 | 2.90 | 9  | 24  | 1 | 9.00  | 68.8 | 24  |
| 2.00 | 1 | 2.60 | 14 | 132 | 1 | 8.70  | 75.4 | 132 |
| 1.00 | 1 | 3.00 | 5  | 24  | 1 | 8.00  | 75.0 | 24  |
| 2.00 | 2 | 3.40 | 2  | 48  | 1 | 4.60  | 55.0 | 48  |
| 1.00 | 1 | 3.30 | 20 | 49  | 1 | 10.90 | 87.4 | 49  |
| 1.00 | 1 | 3.60 | 10 | 24  | 1 | 10.00 | 79.0 | 24  |
| 2.00 | 2 | 2.80 | 17 | 66  | 1 | 9.30  | 77.0 | 66  |
| 2.00 | 2 | 3.00 | 9  | 23  | 1 | 9.00  | 68.0 | 23  |
| 2.00 | 2 | 2.60 | 24 | 36  | 1 | 8.90  | 81.0 | 36  |
| 1.00 | 1 | 3.00 | 9  | 22  | 1 | 9.60  | 75.0 | 22  |
| 1.00 | 1 | 2.60 | 17 | 96  | 1 | 8.30  | 77.0 | 96  |
| 1.00 | 1 | 4.00 | 7  | 23  | 1 | 9.00  | 74.0 | 23  |
| 2.00 | 2 | 3.00 | 16 | 48  | 1 | 8.90  | 80.0 | 48  |
| 1.00 | 2 | 2.70 | 4  | 19  | 1 | 7.80  | 57.7 | 19  |
| 1.00 | 2 | 3.40 | 7  | 23  | 1 | 6.40  | 69.0 | 23  |
| 2.00 | 1 | 2.80 | 23 | 60  | 1 | 9.10  | 80.5 | 60  |
| 2.00 | 1 | 3.50 | 24 | 72  | 1 | 10.00 | 85.0 | 72  |
| 1.00 | 1 | 3.40 | 9  | 24  | 1 | 7.20  | 69.0 | 24  |
| 2.00 | 1 | 2.80 | 11 | 81  | 1 | 14.50 | 79.5 | 81  |
| 1.00 | 1 | 2.90 | 8  | 23  | 1 | 8.50  | 60.0 | 23  |
| 2.00 | 2 | 3.00 | 6  | 51  | 1 | 7.60  | 69.0 | 51  |
| 1.00 | 2 | 2.90 | 7  | 20  | 1 | 7.90  | 69.7 | 20  |
| 2.00 | 1 | 4.20 | 19 | 54  | 1 | 10.20 | 78.2 | 54  |
| 1.00 | 2 | 2.50 | 4  | 24  | 1 | 6.00  | 65.0 | 24  |
| 2.00 | 2 | 2.50 | 13 | 49  | 1 | 8.40  | 74.2 | 49  |
| 2.00 | 2 | 2.90 | 23 | 77  | 1 | 10.50 | 81.8 | 77  |
| 1.00 | 1 | 3.20 | 7  | 23  | 1 | 8.00  | 76.5 | 23  |
| 2.00 | 1 | 3.00 | 2  | 21  | 1 | 5.00  | 57.2 | 21  |
| 1.00 | 2 | 2.80 | 3  | 18  | 1 | 8.80  | 68.5 | 18  |
| 1.00 | 1 | 2.50 | 17 | 36  | 1 | 8.60  | 79.3 | 36  |
| 1.00 | 2 | 2.50 | 9  | 24  | 1 | 6.20  | 67.3 | 24  |
| 2.00 | 2 | 3.00 | 9  | 45  | 1 | 8.40  | 72.3 | 45  |
| 1.00 | 1 | 2.60 | 6  | 23  | 1 | 7.50  | 63.2 | 23  |
| 2.00 | 1 | 3.80 | 13 | 40  | 1 | 9.60  | 77.2 | 40  |
| 1.00 | 1 | 2.90 | 8  | 21  | 1 | 8.90  | 78.5 | 21  |
| 1.00 | 1 | 2.80 | 6  | 24  | 1 | 7.00  | 64.3 | 24  |
| 2.00 | 1 | 3.10 | 23 | 84  | 1 | 11.20 | 83.5 | 84  |
| 2.00 | 1 | 2.70 | 9  | 38  | 1 | 8.50  | 80.5 | 38  |
| 1.00 | 2 | 3.40 | 7  | 24  | 1 | 8.50  | 60.1 | 24  |



|      |   |      |    |     |   |       |      |    |
|------|---|------|----|-----|---|-------|------|----|
| 2.00 | 2 | 2.90 | 23 | 48  | 1 | 9.00  | 75.6 | 48 |
| 1.00 | 1 | 3.00 | 6  | 22  | 1 | 7.90  | 66.6 | 22 |
| 1.00 | 1 | 2.50 | 11 | 22  | 1 | 10.60 | 76.8 | 22 |
| 1.00 | 2 | 3.10 | 9  | 24  | 1 | 8.60  | 71.2 | 24 |
| 2.00 | 1 | 2.10 | 9  | 55  | 1 | 7.50  | 71.0 | 55 |
| 1.00 | 2 | 2.90 | 8  | 31  | 1 | 7.50  | 69.1 | 31 |
| 1.00 | 2 | 2.90 | 11 | 21  | 1 | 7.90  | 74.4 | 21 |
| 2.00 | 1 | 3.40 | 8  | 48  | 1 | 8.40  | 72.8 | 48 |
| 2.00 | 1 | 3.40 | 5  | 51  | 1 | 7.60  | 66.9 | 51 |
| 1.00 | 2 | 2.54 | 8  | 22  | 1 | 6.30  | 70.4 | 22 |
| 1.00 | 2 | 2.30 | 15 | 69  | 1 | 8.30  | 70.0 | 69 |
| 1.00 | 2 | 2.30 | 8  | 21  | 1 | 7.01  | 67.8 | 21 |
| 2.00 | 1 | 2.50 | 12 | 53  | 1 | 7.40  | 72.1 | 53 |
| 1.00 | 2 | 2.90 | 8  | 20  | 1 | 7.80  | 79.8 | 20 |
| 2.00 | 2 | 2.50 | 10 | 38  | 1 | 8.50  | 67.0 | 38 |
| 1.00 | 1 | 3.30 | 11 | 52  | 1 | 10.60 | 76.8 | 52 |
| 1.00 | 2 | 3.00 | 6  | 23  | 1 | 10.40 | 68.0 | 23 |
| 2.00 | 1 | 3.90 | 4  | 168 | 1 | 5.00  | 60.0 | 40 |
| 1.00 | 1 | 3.25 | 5  | 22  | 0 | 6.00  | 67.5 | 22 |
| 2.00 | 2 | 2.90 | 24 | 59  | 1 | 12.70 | 89.1 | 59 |
| 2.00 | 1 | 3.20 | 24 | 83  | 1 | 10.50 | 80.6 | 83 |
| 1.00 | 1 | 3.20 | 7  | 24  | 1 | 8.00  | 76.6 | 24 |
| 2.00 | 2 | 3.40 | 24 | 72  | 1 | 12.50 | 88.3 | 72 |
| 1.00 | 1 | 3.12 | 3  | 23  | 1 | 5.00  | 60.0 | 23 |
| 1.00 | 1 | 2.90 | 7  | 35  | 1 | 8.70  | 73.8 | 35 |
| 1.00 | 2 | 3.00 | 6  | 19  | 1 | 6.80  | 68.1 | 19 |
| 1.00 | 2 | 2.00 | 4  | 23  | 1 | 5.40  | 63.0 | 23 |
| 2.00 | 1 | 3.20 | 3  | 41  | 1 | 5.60  | 62.0 | 41 |
| 1.00 | 2 | 2.80 | 8  | 19  | 1 | 7.80  | 67.1 | 19 |
| 2.00 | 1 | 3.40 | 24 | 84  | 1 | 10.20 | 80.5 | 84 |
| 1.00 | 2 | 3.00 | 9  | 22  | 1 | 8.70  | 72.7 | 22 |
| 1.00 | 2 | 3.50 | 2  | 54  | 1 | 4.80  | 60.4 | 54 |
| 2.00 | 1 | 2.80 | 4  | 19  | 1 | 5.40  | 65.0 | 19 |
| 1.00 | 2 | 2.90 | 4  | 19  | 1 | 9.00  | 65.0 | 19 |
| 2.00 | 1 | 3.00 | 20 | 84  | 1 | 8.80  | 82.3 | 84 |
| 1.00 | 2 | 2.30 | 4  | 23  | 1 | 5.70  | 67.1 | 23 |
| 1.00 | 1 | 2.60 | 2  | 70  | 1 | 6.10  | 60.2 | 70 |
| 2.00 | 2 | 3.10 | 7  | 99  | 1 | 7.80  | 73.0 | 99 |
| 1.00 | 2 | 3.80 | 6  | 24  | 1 | 8.00  | 70.0 | 24 |
| 1.00 | 1 | 2.40 | 12 | 22  | 1 | 8.50  | 77.2 | 22 |
| 2.00 | 1 | 2.50 | 14 | 53  | 1 | 10.60 | 78.5 | 53 |
| 2.00 | 1 | 3.20 | 7  | 21  | 1 | 5.60  | 62.5 | 21 |
| 1.00 | 1 | 3.20 | 10 | 23  | 1 | 10.00 | 72.6 | 23 |
| 2.00 | 1 | 2.80 | 24 | 59  | 1 | 12.30 | 87.0 | 59 |
| 1.00 | 2 | 2.70 | 13 | 24  | 1 | 8.20  | 71.0 | 24 |
| 1.00 | 2 | 2.70 | 3  | 51  | 1 | 6.80  | 69.0 | 51 |
| 2.00 | 1 | 3.20 | 5  | 59  | 1 | 7.00  | 65.9 | 59 |

|      |   |      |    |    |   |       |      |    |
|------|---|------|----|----|---|-------|------|----|
| 1.00 | 2 | 2.70 | 5  | 24 | 1 | 6.90  | 63.8 | 24 |
| 1.00 | 1 | 3.10 | 5  | 23 | 1 | 6.90  | 66.8 | 23 |
| 2.00 | 2 | 2.90 | 6  | 19 | 1 | 6.80  | 67.2 | 19 |
| 2.00 | 1 | 2.00 | 20 | 96 | 1 | 8.40  | 80.5 | 96 |
| 1.00 | 2 | 2.80 | 5  | 21 | 1 | 6.80  | 65.0 | 21 |
| 2.00 | 2 | 3.10 | 4  | 42 | 1 | 7.11  | 63.8 | 42 |
| 2.00 | 2 | 2.90 | 9  | 50 | 1 | 9.10  | 73.2 | 50 |
| 1.00 | 1 | 2.30 | 10 | 23 | 1 | 7.60  | 73.6 | 23 |
| 2.00 | 2 | 2.90 | 12 | 48 | 1 | 7.50  | 72.7 | 48 |
| 1.00 | 2 | 3.00 | 12 | 23 | 1 | 9.50  | 77.6 | 23 |
| 2.00 | 1 | 2.90 | 15 | 84 | 1 | 8.80  | 77.5 | 84 |
| 1.00 | 2 | 3.30 | 10 | 23 | 1 | 9.40  | 73.0 | 23 |
| 1.00 | 2 | 2.60 | 3  | 54 | 1 | 5.00  | 62.0 | 54 |
| 1.00 | 1 | 3.20 | 9  | 24 | 1 | 9.00  | 77.4 | 24 |
| 1.00 | 1 | 3.30 | 13 | 23 | 1 | 9.20  | 78.6 | 23 |
| 2.00 | 1 | 3.40 | 2  | 48 | 1 | 6.20  | 64.0 | 48 |
| 1.00 | 2 | 3.00 | 9  | 24 | 1 | 10.60 | 72.0 | 24 |
| 2.00 | 1 | 2.40 | 21 | 72 | 1 | 8.90  | 81.9 | 72 |
| 1.00 | 2 | 3.10 | 11 | 23 | 1 | 7.70  | 73.6 | 23 |
| 2.00 | 2 | 3.00 | 13 | 48 | 1 | 10.50 | 79.5 | 48 |
| 1.00 | 2 | 2.90 | 6  | 24 | 1 | 8.20  | 70.0 | 24 |
| 1.00 | 2 | 3.50 | 7  | 23 | 0 | 10.10 | 68.3 | 23 |
| 2.00 | 1 | 2.40 | 15 | 36 | 1 | 7.90  | 78.4 | 36 |
| 2.00 | 1 | 3.00 | 8  | 60 | 1 | 6.70  | 67.8 | 60 |
| 2.00 | 2 | 2.20 | 8  | 22 | 1 | 7.51  | 71.6 | 22 |
| 1.00 | 2 | 3.00 | 11 | 24 | 1 | 7.50  | 71.1 | 24 |
| 2.00 | 1 | 2.80 | 8  | 36 | 1 | 7.90  | 70.7 | 36 |
| 1.00 | 1 | 2.10 | 11 | 22 | 1 | 7.90  | 69.2 | 22 |
| 2.00 | 1 | 2.50 | 4  | 79 | 1 | 6.70  | 61.5 | 79 |
| 1.00 | 2 | 3.40 | 6  | 23 | 1 | 7.70  | 68.2 | 23 |
| 2.00 | 1 | 3.00 | 22 | 52 | 1 | 10.60 | 87.6 | 52 |
| 1.00 | 2 | 2.40 | 14 | 23 | 0 | 7.30  | 70.1 | 23 |
| 2.00 | 1 | 2.60 | 5  | 49 | 1 | 5.10  | 61.0 | 49 |
| 2.00 | 2 | 2.60 | 24 | 58 | 1 | 9.30  | 77.2 | 58 |
| 1.00 | 2 | 2.61 | 7  | 24 | 1 | 8.90  | 76.9 | 24 |
| 1.00 | 1 | 3.00 | 5  | 23 | 1 | 7.00  | 72.7 | 23 |
| 2.00 | 2 | 2.68 | 24 | 65 | 1 | 11.00 | 83.7 | 65 |
| 1.00 | 1 | 3.10 | 9  | 23 | 1 | 10.40 | 70.1 | 23 |
| 1.00 | 2 | 2.80 | 3  | 24 | 1 | 6.50  | 65.0 | 24 |
| 2.00 | 1 | 2.80 | 24 | 72 | 1 | 11.10 | 85.3 | 72 |
| 1.00 | 2 | 3.00 | 24 | 48 | 1 | 10.00 | 86.0 | 48 |
| 1.00 | 1 | 2.70 | 5  | 22 | 1 | 8.50  | 66.1 | 22 |
| 1.00 | 2 | 3.40 | 6  | 45 | 1 | 7.70  | 68.2 | 45 |
| 2.00 | 1 | 3.10 | 6  | 72 | 1 | 8.00  | 68.4 | 72 |
| 1.00 | 2 | 2.50 | 9  | 24 | 1 | 7.90  | 70.0 | 24 |
| 2.00 | 1 | 2.70 | 13 | 49 | 1 | 8.60  | 81.3 | 49 |
| 1.00 | 2 | 3.30 | 24 | 48 | 1 | 9.70  | 80.7 | 48 |

|      |   |      |    |    |   |       |      |    |
|------|---|------|----|----|---|-------|------|----|
| 1.00 | 2 | 3.70 | 3  | 21 | 1 | 6.30  | 62.2 | 21 |
| 2.00 | 1 | 3.70 | 5  | 77 | 1 | 8.30  | 67.0 | 77 |
| 1.00 | 1 | 3.40 | 3  | 23 | 1 | 5.10  | 59.5 | 23 |
| 2.00 | 2 | 3.30 | 6  | 32 | 1 | 6.00  | 66.4 | 32 |
| 2.00 | 1 | 2.50 | 14 | 52 | 1 | 8.30  | 83.7 | 52 |
| 1.00 | 2 | 2.50 | 9  | 23 | 1 | 8.60  | 74.5 | 23 |
| 1.00 | 1 | 2.00 | 6  | 23 | 1 | 9.20  | 73.0 | 23 |
| 2.00 | 1 | 2.90 | 5  | 48 | 1 | 6.90  | 65.0 | 48 |
| 2.00 | 2 | 3.10 | 12 | 24 | 1 | 8.50  | 74.0 | 24 |
| 2.00 | 1 | 3.00 | 3  | 44 | 1 | 7.00  | 56.0 | 44 |
| 1.00 | 2 | 2.90 | 11 | 24 | 1 | 8.80  | 70.0 | 24 |
| 2.00 | 2 | 2.60 | 18 | 71 | 1 | 8.50  | 79.7 | 71 |
| 1.00 | 2 | 3.40 | 7  | 23 | 1 | 8.70  | 72.0 | 23 |
| 2.00 | 2 | 2.90 | 20 | 53 | 1 | 8.60  | 84.0 | 53 |
| 1.00 | 1 | 2.70 | 12 | 24 | 1 | 7.90  | 70.0 | 24 |
| 2.00 | 1 | 2.90 | 23 | 99 | 1 | 13.90 | 89.0 | 99 |
| 1.00 | 1 | 3.50 | 11 | 76 | 1 | 8.80  | 74.0 | 76 |
| 1.00 | 2 | 3.00 | 3  | 24 | 1 | 8.20  | 64.0 | 24 |
| 2.00 | 1 | 3.50 | 2  | 46 | 1 | 7.00  | 59.4 | 46 |
| 2.00 | 2 | 2.80 | 11 | 49 | 1 | 8.70  | 70.0 | 49 |
| 1.00 | 1 | 3.20 | 10 | 19 | 1 | 9.60  | 76.5 | 19 |
| 2.00 | 1 | 3.10 | 13 | 99 | 1 | 8.60  | 77.0 | 99 |
| 1.00 | 1 | 3.60 | 8  | 37 | 1 | 7.40  | 73.3 | 37 |
| 2.00 | 1 | 2.70 | 4  | 20 | 1 | 5.40  | 64.3 | 20 |
| 1.00 | 1 | 2.60 | 2  | 24 | 1 | 5.70  | 60.1 | 24 |
| 1.00 | 2 | 2.70 | 5  | 31 | 1 | 7.00  | 64.1 | 31 |
| 2.00 | 1 | 3.00 | 11 | 22 | 1 | 8.80  | 74.1 | 22 |
| 2.00 | 2 | 3.30 | 11 | 62 | 1 | 7.70  | 72.8 | 62 |
| 1.00 | 1 | 2.80 | 5  | 35 | 1 | 6.20  | 68.0 | 35 |
| 2.00 | 2 | 2.60 | 23 | 42 | 1 | 9.50  | 81.1 | 42 |
| 1.00 | 2 | 2.90 | 2  | 23 | 1 | 5.50  | 57.0 | 23 |
| 1.00 | 2 | 3.20 | 5  | 24 | 1 | 7.50  | 72.0 | 24 |
| 1.00 | 2 | 3.40 | 10 | 36 | 1 | 7.20  | 68.3 | 36 |
| 2.00 | 2 | 4.50 | 16 | 60 | 1 | 9.50  | 79.1 | 60 |
| 1.00 | 1 | 2.00 | 8  | 22 | 1 | 6.50  | 64.6 | 22 |
| 2.00 | 1 | 3.80 | 9  | 55 | 1 | 10.20 | 72.4 | 55 |
| 2.00 | 1 | 2.90 | 13 | 21 | 1 | 9.60  | 79.1 | 21 |
| 1.00 | 1 | 4.40 | 11 | 24 | 1 | 10.80 | 80.1 | 24 |
| 1.00 | 1 | 2.60 | 6  | 23 | 1 | 7.70  | 65.9 | 23 |
| 2.00 | 2 | 3.20 | 18 | 62 | 1 | 11.10 | 79.0 | 62 |
| 2.00 | 2 | 3.40 | 11 | 63 | 1 | 8.10  | 71.0 | 63 |
| 1.00 | 1 | 2.60 | 6  | 21 | 1 | 6.10  | 65.0 | 21 |
| 2.00 | 1 | 3.00 | 11 | 56 | 1 | 7.90  | 70.0 | 56 |
| 1.00 | 1 | 2.50 | 11 | 62 | 1 | 9.40  | 73.5 | 62 |
| 1.00 | 2 | 3.70 | 8  | 43 | 1 | 7.20  | 71.0 | 43 |
| 1.00 | 1 | 3.90 | 4  | 24 | 1 | 6.80  | 60.0 | 24 |
| 1.00 | 2 | 2.90 | 8  | 20 | 1 | 8.80  | 77.0 | 20 |

|      |   |      |    |    |   |       |      |    |
|------|---|------|----|----|---|-------|------|----|
| 2.00 | 1 | 3.10 | 16 | 66 | 1 | 9.10  | 76.0 | 66 |
| 2.00 | 2 | 3.10 | 5  | 20 | 1 | 8.90  | 67.0 | 20 |
| 2.00 | 2 | 3.10 | 6  | 38 | 1 | 8.20  | 65.4 | 38 |
| 1.00 | 2 | 3.70 | 6  | 42 | 1 | 6.20  | 66.0 | 42 |
| 1.00 | 2 | 3.50 | 13 | 24 | 1 | 8.40  | 75.0 | 24 |
| 2.00 | 1 | 3.00 | 19 | 67 | 1 | 10.60 | 80.0 | 67 |
| 2.00 | 1 | 2.90 | 13 | 35 | 1 | 8.60  | 74.9 | 35 |
| 1.00 | 1 | 3.30 | 3  | 24 | 1 | 7.50  | 64.0 | 24 |
| 2.00 | 2 | 2.50 | 16 | 52 | 1 | 9.00  | 76.5 | 52 |
| 2.00 | 1 | 3.20 | 8  | 23 | 1 | 7.60  | 68.2 | 23 |
| 1.00 | 1 | 3.50 | 7  | 21 | 1 | 9.40  | 78.0 | 21 |
| 2.00 | 2 | 3.10 | 5  | 50 | 1 | 7.90  | 68.0 | 50 |
| 1.00 | 2 | 2.60 | 10 | 22 | 1 | 7.00  | 72.0 | 22 |
| 1.00 | 2 | 2.70 | 7  | 19 | 1 | 9.00  | 73.0 | 19 |
| 2.00 | 2 | 2.90 | 13 | 22 | 1 | 8.90  | 75.1 | 22 |
| 2.00 | 1 | 3.10 | 17 | 40 | 1 | 9.70  | 80.0 | 40 |
| 2.00 | 1 | 3.50 | 5  | 72 | 1 | 7.10  | 68.0 | 72 |
| 1.00 | 1 | 3.10 | 3  | 19 | 1 | 5.50  | 56.0 | 19 |
| 2.00 | 1 | 3.20 | 9  | 90 | 1 | 8.30  | 70.9 | 90 |
| 2.00 | 2 | 2.70 | 18 | 51 | 1 | 7.50  | 74.2 | 51 |
| 1.00 | 1 | 3.40 | 11 | 23 | 1 | 10.80 | 80.0 | 23 |
| 1.00 | 1 | 2.90 | 24 | 49 | 1 | 10.40 | 86.0 | 49 |
| 2.00 | 1 | 2.70 | 24 | 37 | 1 | 9.60  | 76.0 | 37 |
| 2.00 | 1 | 3.60 | 2  | 23 | 1 | 4.20  | 57.0 | 23 |
| 1.00 | 1 | 3.10 | 9  | 21 | 1 | 8.90  | 71.5 | 21 |
| 2.00 | 2 | 3.90 | 8  | 55 | 1 | 8.90  | 70.0 | 55 |
| 1.00 | 1 | 3.00 | 2  | 48 | 1 | 5.50  | 60.3 | 48 |
| 1.00 | 2 | 2.80 | 4  | 22 | 1 | 4.10  | 58.0 | 22 |
| 1.00 | 1 | 3.40 | 2  | 54 | 1 | 5.00  | 62.0 | 54 |
| 1.00 | 2 | 2.30 | 4  | 17 | 1 | 7.50  | 68.0 | 17 |
| 1.00 | 2 | 3.00 | 12 | 23 | 1 | 9.50  | 78.1 | 23 |
| 1.00 | 1 | 2.90 | 7  | 20 | 1 | 11.50 | 70.0 | 20 |
| 2.00 | 2 | 4.10 | 17 | 38 | 1 | 6.50  | 65.2 | 38 |
| 1.00 | 2 | 3.70 | 4  | 30 | 0 | 5.60  | 60.0 | 30 |
| 2.00 | 2 | 3.10 | 5  | 57 | 1 | 7.00  | 69.2 | 57 |
| 1.00 | 2 | 3.00 | 14 | 24 | 1 | 9.50  | 79.0 | 24 |
| 1.00 | 1 | 2.60 | 5  | 19 | 1 | 7.70  | 67.0 | 19 |
| 1.00 | 1 | 3.00 | 5  | 24 | 1 | 6.00  | 69.0 | 24 |
| 1.00 | 1 | 2.30 | 4  | 23 | 1 | 6.80  | 66.0 | 23 |
| 1.00 | 2 | 3.40 | 4  | 20 | 1 | 6.00  | 64.0 | 20 |
| 2.00 | 1 | 3.00 | 23 | 72 | 1 | 12.30 | 86.2 | 72 |
| 1.00 | 2 | 3.40 | 8  | 24 | 1 | 7.30  | 68.2 | 24 |
| 1.00 | 1 | 3.60 | 11 | 96 | 1 | 9.20  | 76.0 | 96 |
| 2.00 | 2 | 3.00 | 9  | 67 | 1 | 8.70  | 72.7 | 67 |
| 1.00 | 1 | 3.00 | 3  | 23 | 1 | 5.50  | 60.4 | 23 |
| 1.00 | 2 | 3.20 | 9  | 23 | 1 | 10.70 | 77.7 | 23 |
| 1.00 | 2 | 2.80 | 8  | 21 | 1 | 8.00  | 71.2 | 21 |

|      |   |      |    |    |   |       |      |    |
|------|---|------|----|----|---|-------|------|----|
| 2.00 | 2 | 3.10 | 15 | 60 | 1 | 8.50  | 78.0 | 60 |
| 1.00 | 2 | 3.00 | 12 | 36 | 1 | 8.00  | 62.0 | 36 |
| 1.00 | 1 | 3.30 | 6  | 22 | 1 | 10.00 | 73.5 | 22 |
| 1.00 | 2 | 2.70 | 18 | 49 | 1 | 7.30  | 76.0 | 49 |
| 1.00 | 1 | 2.80 | 2  | 24 | 1 | 5.50  | 60.5 | 24 |
| 1.00 | 2 | 2.80 | 23 | 96 | 1 | 10.00 | 88.0 | 96 |
| 1.00 | 2 | 2.70 | 7  | 21 | 1 | 7.40  | 69.0 | 21 |
| 2.00 | 1 | 3.80 | 13 | 49 | 1 | 9.00  | 79.0 | 49 |
| 2.00 | 2 | 2.40 | 9  | 21 | 1 | 8.26  | 67.0 | 21 |
| 2.00 | 1 | 3.90 | 5  | 49 | 1 | 5.10  | 61.0 | 49 |
| 1.00 | 1 | 2.70 | 5  | 19 | 1 | 7.30  | 73.4 | 19 |
| 2.00 | 2 | 3.10 | 2  | 47 | 1 | 5.90  | 57.5 | 47 |
| 1.00 | 1 | 3.30 | 7  | 23 | 1 | 9.80  | 78.0 | 23 |
| 1.00 | 2 | 2.20 | 11 | 35 | 1 | 7.10  | 72.0 | 35 |
| 1.00 | 1 | 3.00 | 2  | 24 | 1 | 6.80  | 62.3 | 24 |
| 2.00 | 1 | 3.20 | 12 | 36 | 1 | 7.90  | 75.1 | 36 |
| 1.00 | 1 | 3.80 | 9  | 24 | 1 | 11.90 | 76.5 | 24 |
| 1.00 | 1 | 2.70 | 8  | 23 | 1 | 8.00  | 71.3 | 23 |
| 1.00 | 2 | 2.90 | 6  | 22 | 1 | 10.50 | 70.0 | 22 |
| 1.00 | 1 | 2.50 | 6  | 35 | 1 | 6.20  | 57.5 | 35 |
| 1.00 | 1 | 3.10 | 8  | 22 | 1 | 7.50  | 67.0 | 22 |
| 1.00 | 2 | 2.40 | 13 | 48 | 1 | 9.20  | 78.2 | 48 |
| 1.00 | 2 | 3.40 | 10 | 21 | 1 | 8.00  | 62.5 | 21 |
| 2.00 | 2 | 2.40 | 3  | 24 | 1 | 5.00  | 65.5 | 24 |
| 2.00 | 1 | 3.40 | 18 | 53 | 1 | 10.30 | 81.5 | 53 |
| 1.00 | 2 | 2.90 | 6  | 24 | 1 | 6.90  | 68.3 | 24 |
| 1.00 | 2 | 2.70 | 9  | 21 | 1 | 8.50  | 77.3 | 21 |
| 1.00 | 1 | 3.40 | 2  | 24 | 1 | 5.20  | 62.1 | 24 |
| 1.00 | 1 | 3.40 | 5  | 52 | 1 | 7.30  | 65.5 | 52 |
| 2.00 | 1 | 3.10 | 21 | 64 | 1 | 9.90  | 81.5 | 64 |
| 2.00 | 1 | 2.70 | 7  | 23 | 1 | 9.90  | 77.6 | 23 |
| 1.00 | 1 | 3.00 | 15 | 24 | 1 | 9.90  | 76.7 | 24 |
| 1.00 | 1 | 3.30 | 2  | 48 | 1 | 6.80  | 60.2 | 48 |
| 2.00 | 1 | 3.20 | 22 | 49 | 1 | 10.10 | 78.5 | 49 |
| 1.00 | 1 | 2.70 | 4  | 22 | 1 | 6.90  | 68.4 | 22 |
| 1.00 | 2 | 3.00 | 4  | 23 | 1 | 6.90  | 61.0 | 23 |
| 2.00 | 1 | 3.10 | 24 | 60 | 1 | 12.40 | 78.4 | 60 |
| 1.00 | 2 | 2.70 | 2  | 19 | 1 | 6.00  | 62.5 | 19 |
| 2.00 | 1 | 2.50 | 4  | 79 | 1 | 6.70  | 61.5 | 79 |
| 1.00 | 1 | 2.90 | 2  | 23 | 1 | 4.20  | 56.0 | 23 |
| 1.00 | 2 | 3.00 | 24 | 92 | 1 | 12.10 | 89.0 | 92 |
| 1.00 | 2 | 2.80 | 8  | 19 | 1 | 8.60  | 64.8 | 19 |
| 1.00 | 1 | 3.40 | 8  | 22 | 1 | 7.70  | 73.3 | 22 |
| 2.00 | 2 | 2.10 | 21 | 65 | 1 | 9.20  | 74.5 | 65 |
| 2.00 | 2 | 2.60 | 7  | 58 | 1 | 6.40  | 64.5 | 58 |
| 1.00 | 2 | 2.00 | 13 | 22 | 1 | 7.10  | 69.5 | 22 |
| 2.00 | 2 | 2.50 | 8  | 55 | 1 | 7.10  | 67.3 | 55 |

|      |   |      |    |    |   |       |      |    |
|------|---|------|----|----|---|-------|------|----|
| 2.00 | 1 | 3.20 | 10 | 20 | 1 | 10.00 | 79.0 | 20 |
| 2.00 | 2 | 2.70 | 13 | 38 | 1 | 8.00  | 76.4 | 38 |
| 1.00 | 2 | 3.20 | 11 | 21 | 1 | 9.60  | 85.0 | 21 |
| 2.00 | 1 | 3.50 | 11 | 40 | 1 | 9.80  | 72.2 | 40 |
| 2.00 | 2 | 2.90 | 13 | 51 | 1 | 7.20  | 75.0 | 51 |
| 1.00 | 2 | 2.50 | 3  | 23 | 1 | 5.10  | 61.0 | 23 |
| 1.00 | 2 | 2.80 | 9  | 19 | 1 | 7.50  | 71.0 | 19 |
| 2.00 | 2 | 3.30 | 14 | 84 | 1 | 9.00  | 74.5 | 84 |
| 1.00 | 1 | 2.60 | 5  | 24 | 1 | 7.00  | 69.5 | 24 |
| 1.00 | 1 | 3.30 | 7  | 39 | 1 | 9.00  | 70.4 | 39 |
| 2.00 | 1 | 3.20 | 13 | 41 | 1 | 10.20 | 77.1 | 41 |
| 2.00 | 2 | 3.20 | 10 | 36 | 1 | 8.20  | 71.0 | 36 |
| 1.00 | 2 | 3.10 | 10 | 21 | 1 | 9.20  | 76.0 | 21 |
| 1.00 | 1 | 2.50 | 9  | 22 | 1 | 10.50 | 83.0 | 22 |
| 2.00 | 1 | 2.50 | 3  | 39 | 1 | 6.60  | 67.0 | 39 |
| 1.00 | 1 | 3.30 | 7  | 50 | 1 | 8.20  | 67.0 | 50 |
| 2.00 | 2 | 3.30 | 5  | 66 | 1 | 7.10  | 66.0 | 66 |
| 1.00 | 1 | 3.20 | 11 | 20 | 1 | 9.30  | 73.0 | 20 |
| 2.00 | 2 | 3.00 | 5  | 24 | 1 | 6.60  | 63.2 | 24 |
| 2.00 | 1 | 3.40 | 3  | 73 | 1 | 7.40  | 61.0 | 73 |
| 1.00 | 1 | 2.90 | 9  | 24 | 1 | 10.60 | 75.9 | 24 |
| 2.00 | 2 | 3.00 | 20 | 65 | 1 | 7.40  | 82.6 | 65 |
| 2.00 | 2 | 3.30 | 18 | 48 | 1 | 9.50  | 77.7 | 48 |
| 1.00 | 2 | 3.10 | 2  | 24 | 1 | 6.10  | 61.1 | 24 |
| 2.00 | 1 | 3.30 | 4  | 35 | 1 | 5.50  | 55.0 | 35 |
| 2.00 | 2 | 2.00 | 4  | 22 | 1 | 8.50  | 68.5 | 22 |
| 1.00 | 2 | 3.40 | 9  | 21 | 1 | 7.70  | 68.6 | 21 |
| 2.00 | 2 | 3.20 | 3  | 64 | 1 | 5.50  | 60.3 | 64 |
| 2.00 | 1 | 3.00 | 24 | 86 | 1 | 11.30 | 84.2 | 86 |
| 1.00 | 2 | 3.00 | 2  | 22 | 1 | 6.00  | 59.5 | 22 |
| 1.00 | 1 | 2.80 | 7  | 24 | 1 | 9.10  | 82.1 | 24 |
| 1.00 | 1 | 2.30 | 24 | 79 | 1 | 10.10 | 86.0 | 79 |
| 2.00 | 1 | 3.00 | 24 | 73 | 1 | 11.20 | 84.0 | 73 |
| 1.00 | 2 | 2.80 | 11 | 24 | 1 | 10.10 | 74.9 | 24 |
| 2.00 | 1 | 3.00 | 24 | 60 | 1 | 13.20 | 88.0 | 60 |
| 1.00 | 1 | 3.10 | 12 | 53 | 1 | 9.50  | 78.1 | 53 |
| 2.00 | 2 | 2.60 | 9  | 24 | 1 | 7.10  | 69.3 | 24 |
| 2.00 | 1 | 3.10 | 13 | 66 | 1 | 7.70  | 71.5 | 66 |
| 1.00 | 1 | 2.90 | 3  | 23 | 1 | 4.70  | 64.2 | 23 |
| 2.00 | 2 | 2.90 | 21 | 92 | 1 | 12.90 | 74.5 | 92 |
| 2.00 | 2 | 2.80 | 9  | 22 | 1 | 11.30 | 76.5 | 22 |
| 1.00 | 2 | 2.80 | 6  | 20 | 1 | 8.40  | 70.5 | 20 |
| 2.00 | 2 | 3.40 | 23 | 84 | 1 | 11.50 | 91.0 | 84 |
| 2.00 | 2 | 2.50 | 4  | 24 | 1 | 5.80  | 69.0 | 24 |
| 2.00 | 1 | 3.20 | 2  | 72 | 1 | 4.50  | 60.2 | 72 |
| 1.00 | 1 | 2.50 | 5  | 19 | 1 | 6.40  | 69.0 | 19 |
| 2.00 | 1 | 2.80 | 22 | 72 | 1 | 13.50 | 91.0 | 72 |

|      |   |      |    |    |   |       |      |    |
|------|---|------|----|----|---|-------|------|----|
| 2.00 | 2 | 3.20 | 24 | 83 | 1 | 10.50 | 82.0 | 83 |
| 1.00 | 1 | 2.70 | 8  | 23 | 1 | 9.80  | 78.0 | 23 |
| 1.00 | 2 | 3.10 | 7  | 21 | 1 | 7.50  | 68.0 | 21 |
| 1.00 | 1 | 2.80 | 4  | 42 | 1 | 8.90  | 69.5 | 22 |
| 2.00 | 2 | 2.50 | 24 | 96 | 1 | 12.40 | 95.6 | 96 |
| 2.00 | 1 | 2.70 | 11 | 23 | 1 | 8.50  | 71.4 | 23 |
| 2.00 | 1 | 2.70 | 14 | 82 | 1 | 9.80  | 80.0 | 82 |
| 1.00 | 2 | 2.70 | 10 | 23 | 1 | 8.20  | 73.0 | 23 |
| 2.00 | 2 | 3.00 | 20 | 74 | 1 | 9.10  | 80.0 | 74 |
| 1.00 | 2 | 3.00 | 8  | 21 | 1 | 7.10  | 80.0 | 21 |
| 2.00 | 2 | 3.00 | 23 | 71 | 1 | 13.50 | 80.0 | 71 |
| 2.00 | 2 | 2.80 | 5  | 23 | 1 | 6.70  | 69.5 | 23 |
| 1.00 | 2 | 3.50 | 9  | 22 | 1 | 9.10  | 70.5 | 22 |
| 2.00 | 1 | 2.60 | 5  | 80 | 1 | 8.20  | 69.3 | 80 |
| 1.00 | 1 | 3.40 | 3  | 24 | 1 | 5.90  | 64.9 | 24 |
| 2.00 | 2 | 3.10 | 24 | 62 | 1 | 10.50 | 83.5 | 62 |
| 1.00 | 1 | 2.50 | 11 | 21 | 1 | 10.10 | 78.2 | 21 |
| 2.00 | 1 | 3.00 | 2  | 37 | 1 | 4.80  | 54.6 | 37 |
| 2.00 | 2 | 3.20 | 6  | 46 | 1 | 7.00  | 69.2 | 46 |
| 1.00 | 2 | 3.00 | 9  | 18 | 1 | 12.00 | 78.5 | 18 |
| 1.00 | 1 | 3.20 | 4  | 23 | 1 | 7.70  | 66.9 | 23 |
| 2.00 | 1 | 4.00 | 24 | 72 | 1 | 11.80 | 84.7 | 72 |
| 1.00 | 1 | 2.60 | 23 | 88 | 1 | 10.00 | 82.5 | 88 |
| 1.00 | 2 | 2.50 | 6  | 21 | 1 | 8.00  | 67.5 | 21 |
| 2.00 | 2 | 2.80 | 21 | 62 | 1 | 12.50 | 82.5 | 62 |
| 1.00 | 2 | 2.30 | 12 | 22 | 1 | 8.60  | 70.0 | 22 |
| 2.00 | 2 | 2.90 | 12 | 40 | 1 | 8.00  | 72.1 | 40 |
| 1.00 | 2 | 2.50 | 11 | 21 | 1 | 7.40  | 74.1 | 21 |
| 1.00 | 1 | 3.50 | 7  | 24 | 1 | 8.80  | 70.3 | 24 |
| 1.00 | 1 | 3.00 | 21 | 44 | 1 | 15.40 | 90.8 | 44 |
| 1.00 | 2 | 2.70 | 13 | 44 | 1 | 8.40  | 74.0 | 44 |
| 1.00 | 1 | 3.00 | 8  | 22 | 1 | 8.50  | 70.6 | 22 |
| 1.00 | 1 | 4.00 | 18 | 61 | 1 | 11.70 | 84.3 | 61 |
| 1.00 | 2 | 3.20 | 9  | 20 | 1 | 8.50  | 74.5 | 20 |
| 1.00 | 2 | 2.80 | 4  | 24 | 1 | 6.00  | 68.8 | 24 |
| 2.00 | 2 | 2.90 | 3  | 47 | 1 | 6.70  | 62.1 | 47 |
| 1.00 | 2 | 2.40 | 3  | 43 | 1 | 6.20  | 59.8 | 43 |
| 1.00 | 2 | 2.20 | 12 | 23 | 1 | 9.00  | 80.0 | 23 |
| 2.00 | 1 | 3.00 | 18 | 72 | 1 | 12.60 | 77.1 | 72 |
| 1.00 | 2 | 2.80 | 4  | 22 | 1 | 5.80  | 59.6 | 22 |
| 1.00 | 1 | 3.50 | 2  | 49 | 1 | 5.30  | 59.2 | 49 |
| 1.00 | 2 | 2.70 | 6  | 24 | 1 | 6.40  | 64.9 | 24 |
| 1.00 | 1 | 2.80 | 3  | 19 | 1 | 7.10  | 63.1 | 19 |
| 1.00 | 2 | 3.00 | 7  | 20 | 1 | 7.00  | 73.5 | 20 |
| 1.00 | 2 | 2.70 | 3  | 23 | 1 | 5.60  | 55.0 | 23 |
| 1.00 | 2 | 3.00 | 3  | 22 | 1 | 6.70  | 62.0 | 22 |
| 2.00 | 2 | 3.20 | 8  | 62 | 1 | 6.40  | 68.5 | 62 |

|      |   |      |    |    |   |      |      |    |
|------|---|------|----|----|---|------|------|----|
| 1.00 | 1 | 3.30 | 4  | 22 | 1 | 6.80 | 68.0 | 22 |
| 1.00 | 1 | 2.40 | 4  | 36 | 1 | 6.70 | 54.5 | 36 |
| 1.00 | 2 | 3.10 | 5  | 22 | 1 | 4.50 | 60.5 | 22 |
| 1.00 | 2 | 3.30 | 3  | 53 | 1 | 4.60 | 54.6 | 53 |
| 1.00 | 1 | 3.30 | 12 | 24 | 1 | 7.80 | 74.1 | 24 |
| 2.00 | 2 | 3.00 | 18 | 54 | 1 | 9.00 | 81.3 | 54 |
| 1.00 | 1 | 2.10 | 9  | 19 | 1 | 7.60 | 71.2 | 19 |
| 2.00 | 1 | 2.70 | 9  | 55 | 1 | 7.30 | 69.0 | 55 |
| 1.00 | 2 | 3.00 | 5  | 22 | 1 | 9.20 | 70.5 | 22 |
| 1.00 | 1 | 2.50 | 8  | 62 | 1 | 8.90 | 68.5 | 62 |
| 2.00 | 1 | 3.20 | 2  | 63 | 1 | 5.30 | 60.3 | 63 |
| 1.00 | 1 | 2.80 | 3  | 23 | 1 | 6.50 | 59.5 | 23 |
| 1.00 | 1 | 3.00 | 3  | 24 | 1 | 6.30 | 69.2 | 24 |
| 2.00 | 1 | 3.40 | 5  | 51 | 1 | 7.60 | 68.5 | 51 |



| B1Dofmot | Age | B4EDUCAT | B5MaritalS | C1motherC | C2Typeof     | C2aOtherO | C2Didthepr | Agedifferer |
|----------|-----|----------|------------|-----------|--------------|-----------|------------|-------------|
| 1        | 34  | 2        | 1          | 1         | 3            |           | 1          | 5           |
| 2        | 25  | 2        | 1          | 1         | 1            |           | 1          | 5           |
| 3        | 30  | 3        | 1          | 1         | 1            |           | 1          | 3           |
| 4        | 30  | 2        | 1          | 2         | 1            |           | 1          | 4           |
| 5        | 33  | 2        | 1          | 1         | 4            |           | 1          | 6           |
| 26       | 25  | 2        | 1          | 1         | 3 1          |           | 1          | 6           |
| 6        | 27  | 4        | 1          | 1         | 4            |           | 1          | 4           |
| 7        | 36  | 4        | 1          | 1         | 3            |           | 1          | 4           |
| 8        | 29  | 4        | 1          | 1         | 1            |           | 1          | 6           |
| 9        | 27  | 3        | 1          | 1         | 3            |           | 1          | 4           |
| 10       | 34  | 1        | 1          | 1         | 1            |           | 1          | 3           |
| 11       | 21  | 2        | 1          | 1         | 3            |           | 1          | 6           |
| 12       | 24  | 1        | 1          | 1         | 1            |           | 1          | 4           |
| 13       | 26  | 2        | 1          | 2         | 1            |           | 1          | 4           |
| 14       | 29  | 2        | 1          | 1         | 1            |           | 1          | 6           |
| 15       | 26  | 2        | 1          | 1         | 1            |           | 1          | 3           |
| 16       | 21  | 2        | 1          | 2         | 1            |           | 1          | 5           |
| 17       | 24  | 2        | 1          | 1         | 1            |           | 1          | 4           |
| 18       | 39  | 3        | 1          | 1         | 4            |           | 1          | 4           |
| 19       | 26  | 2        | 1          | 1         | 3            |           | 1          | 6           |
| 20       | 23  | 2        | 1          | 1         | 1            |           | 1          | 6           |
| 21       | 22  | 2        | 1          | 1         | 1            |           | 1          | 3           |
| 22       | 38  | 2        | 1          | 1         | 1            |           | 1          | 6           |
| 23       | 42  | 3        | 2          | 1         | 1            |           | 1          | 3           |
| 24       | 29  | 2        | 1          | 1         | 5            |           | 1          | 6           |
| 25       | 33  | 1        | 1          | 1         | 3            |           | 1          | 5           |
| 27       | 40  | 2        | 1          | 1         | 3            |           | 1          | 5           |
| 28       | 25  | 2        | 1          | 1         | 1            |           | 1          | 4           |
| 29       | 29  | 1        | 1          | 1         | 3            |           | 1          | 6           |
| 30       | 30  | 2        | 1          | 1         | 3            |           | 1          | 4           |
| 31       | 24  | 1        | 2          | 2         | 3            |           | 1          | 3           |
| 32       | 27  | 1        | 2          | 1         | 1            |           | 1          | 5           |
| 33       | 30  | 1        | 1          | 1         | 1            |           | 1          | 6           |
| 34       | 26  | 1        | 1          | 1         | 3            |           | 1          | 6           |
| 35       | 35  | 1        | 1          | 1         | 3            |           | 1          | 4           |
| 36       | 30  | 4        | 1          | 1         | 6 unemploye  |           | 1          | 3           |
| 37       | 28  | 3        | 1          | 1         | 1            |           | 1          | 6           |
| 38       | 24  | 2        | 1          | 1         | 6 apprentice |           | 1          | 3           |
| 39       | 22  | 2        | 1          | 1         | 5            |           | 1          | 3           |
| 40       | 35  | 1        | 1          | 1         | 1            |           | 1          | 4           |
| 41       | 32  | 2        | 1          | 1         | 5            |           | 1          | 5           |
| 42       | 25  | 2        | 1          | 2         | 1            |           | 1          | 3           |
| 43       | 25  | 2        | 1          | 2         | 1            |           | 1          | 5           |
| 44       | 35  | 2        | 1          | 1         | 3            |           | 1          | 6           |
| 45       | 25  | 1        | 1          | 2         | 3            |           | 1          | 6           |
| 46       | 35  | 1        | 1          | 1         | 3            |           | 1          | 5           |

|     |    |   |   |   |   |   |   |
|-----|----|---|---|---|---|---|---|
| 46  | 25 | 2 | 1 | 2 | 1 | 1 | 5 |
| 47  | 23 | 2 | 2 | 2 | 1 | 1 | 3 |
| 48  | 25 | 2 | 1 | 1 | 1 | 1 | 6 |
| 49  | 24 | 2 | 1 | 1 | 5 | 1 | 6 |
| 50  | 30 | 1 | 1 | 2 | 1 | 1 | 3 |
| 53  | 21 | 2 | 1 | 1 | 5 | 1 | 6 |
| 54  | 42 | 1 | 1 | 1 | 3 | 1 | 4 |
| 81  | 24 | 2 | 1 | 1 | 5 | 1 | 5 |
| 82  | 22 | 1 | 1 | 1 | 3 | 1 | 6 |
| 83  | 37 | 1 | 1 | 1 | 3 | 1 | 4 |
| 84  | 19 | 2 | 2 | 2 | 6 | 1 | 4 |
| 85  | 23 | 2 | 2 | 2 | 6 | 1 | 5 |
| 86  | 41 | 2 | 1 | 1 | 5 | 1 | 6 |
| 87  | 20 | 1 | 1 | 2 | 1 | 1 | 5 |
| 88  | 21 | 2 | 1 | 1 | 5 | 1 | 3 |
| 89  | 36 | 1 | 1 | 1 | 3 | 1 | 5 |
| 90  | 21 | 2 | 1 | 1 | 5 | 1 | 3 |
| 91  | 30 | 1 | 1 | 1 | 3 | 1 | 5 |
| 92  | 26 | 1 | 1 | 1 | 3 | 1 | 5 |
| 93  | 38 | 1 | 1 | 1 | 1 | 1 | 3 |
| 94  | 38 | 1 | 1 | 1 | 3 | 1 | 5 |
| 95  | 40 | 1 | 1 | 1 | 3 | 1 | 6 |
| 96  | 21 | 1 | 2 | 2 | 1 | 1 | 4 |
| 97  | 27 | 1 | 1 | 1 | 3 | 1 | 5 |
| 98  | 30 | 2 | 1 | 1 | 3 | 1 | 3 |
| 99  | 40 | 2 | 1 | 1 | 3 | 1 | 4 |
| 100 | 31 | 2 | 1 | 1 | 3 | 1 | 5 |
| 101 | 24 | 3 | 1 | 1 | 1 | 1 | 5 |
| 102 | 19 | 2 | 1 | 1 | 3 | 1 | 4 |
| 103 | 37 | 1 | 1 | 1 | 2 | 1 | 5 |
| 104 | 29 | 2 | 1 | 1 | 3 | 1 | 3 |
| 105 | 38 | 1 | 1 | 1 | 3 | 1 | 5 |
| 106 | 32 | 1 | 1 | 1 | 3 | 1 | 3 |
| 107 | 38 | 2 | 2 | 1 | 3 | 1 | 6 |
| 108 | 37 | 1 | 2 | 1 | 2 | 1 | 6 |
| 109 | 42 | 1 | 1 | 1 | 3 | 1 | 3 |
| 110 | 42 | 2 | 1 | 1 | 3 | 1 | 5 |
| 111 | 33 | 3 | 1 | 1 | 4 | 1 | 6 |
| 112 | 35 | 1 | 1 | 1 | 1 | 1 | 4 |
| 113 | 31 | 3 | 1 | 1 | 4 | 1 | 5 |
| 114 | 32 | 2 | 1 | 1 | 2 | 1 | 5 |
| 115 | 25 | 2 | 1 | 2 | 5 | 1 | 4 |
| 116 | 26 | 2 | 1 | 1 | 2 | 1 | 5 |
| 117 | 20 | 2 | 1 | 1 | 3 | 1 | 3 |
| 118 | 30 | 1 | 1 | 1 | 3 | 1 | 6 |
| 119 | 28 | 2 | 1 | 1 | 5 | 1 | 4 |
| 120 | 40 | 4 | 1 | 1 | 5 | 1 | 4 |

|     |    |   |   |   |   |   |   |
|-----|----|---|---|---|---|---|---|
| 121 | 40 | 1 | 1 | 1 | 3 | 1 | 6 |
| 122 | 25 | 1 | 1 | 2 | 1 | 1 | 3 |
| 123 | 24 | 3 | 1 | 2 | 1 | 1 | 5 |
| 124 | 30 | 2 | 1 | 2 | 1 | 1 | 3 |
| 124 | 30 | 2 | 1 | 2 | 1 | 1 | 5 |
| 125 | 27 | 1 | 1 | 2 | 6 | 1 | 4 |
| 126 | 30 | 1 | 1 | 2 | 6 | 1 | 6 |
| 127 | 20 | 2 | 1 | 1 | 5 | 1 | 3 |
| 128 | 30 | 1 | 1 | 1 | 3 | 1 | 6 |
| 129 | 29 | 2 | 1 | 2 | 6 | 1 | 4 |
| 130 | 22 | 1 | 1 | 1 | 5 | 1 | 5 |
| 131 | 36 | 1 | 1 | 1 | 3 | 1 | 3 |
| 132 | 35 | 1 | 1 | 1 | 1 | 1 | 6 |
| 133 | 37 | 1 | 1 | 1 | 3 | 1 | 5 |
| 134 | 28 | 1 | 1 | 1 | 3 | 1 | 6 |
| 135 | 27 | 2 | 1 | 1 | 3 | 1 | 3 |
| 136 | 40 | 1 | 1 | 1 | 3 | 1 | 4 |
| 137 | 38 | 1 | 1 | 1 | 3 | 1 | 3 |
| 138 | 23 | 1 | 1 | 1 | 3 | 1 | 5 |
| 139 | 19 | 2 | 1 | 2 | 1 | 1 | 3 |
| 140 | 20 | 2 | 1 | 1 | 3 | 1 | 5 |
| 141 | 22 | 1 | 1 | 1 | 3 | 1 | 5 |
| 142 | 36 | 1 | 1 | 1 | 3 | 1 | 3 |
| 143 | 25 | 1 | 1 | 1 | 1 | 1 | 5 |
| 144 | 27 | 2 | 1 | 1 | 3 | 1 | 6 |
| 145 | 39 | 1 | 1 | 1 | 3 | 1 | 4 |
| 146 | 20 | 2 | 1 | 1 | 1 | 1 | 5 |
| 147 | 41 | 1 | 1 | 1 | 1 | 1 | 5 |
| 148 | 29 | 2 | 1 | 1 | 3 | 1 | 3 |
| 149 | 23 | 2 | 1 | 1 | 1 | 1 | 5 |
| 150 | 28 | 2 | 1 | 1 | 1 | 1 | 4 |
| 151 | 26 | 1 | 1 | 1 | 5 | 1 | 4 |
| 152 | 25 | 2 | 1 | 1 | 1 | 1 | 5 |
| 153 | 31 | 1 | 1 | 2 | 6 | 1 | 4 |
| 154 | 30 | 4 | 1 | 1 | 1 | 1 | 6 |
| 155 | 22 | 1 | 1 | 2 | 1 | 1 | 4 |
| 156 | 22 | 2 | 1 | 2 | 1 | 1 | 4 |
| 157 | 35 | 1 | 1 | 2 | 1 | 1 | 5 |
| 158 | 31 | 2 | 1 | 2 | 1 | 1 | 3 |
| 159 | 28 | 3 | 1 | 1 | 1 | 1 | 5 |
| 160 | 28 | 1 | 1 | 1 | 3 | 1 | 3 |
| 161 | 32 | 1 | 1 | 1 | 3 | 1 | 5 |
| 162 | 27 | 1 | 1 | 1 | 3 | 1 | 4 |
| 163 | 26 | 2 | 1 | 1 | 3 | 1 | 4 |
| 164 | 20 | 2 | 1 | 1 | 5 | 1 | 5 |
| 165 | 30 | 1 | 1 | 1 | 3 | 1 | 4 |
| 166 | 30 | 1 | 1 | 1 | 3 | 1 | 3 |

|     |    |   |   |   |   |   |   |
|-----|----|---|---|---|---|---|---|
| 167 | 32 | 2 | 1 | 1 | 5 | 1 | 6 |
| 168 | 30 | 2 | 1 | 1 | 3 | 1 | 3 |
| 169 | 30 | 2 | 1 | 1 | 1 | 1 | 5 |
| 170 | 20 | 2 | 1 | 2 | 6 | 1 | 5 |
| 171 | 32 | 1 | 1 | 1 | 1 | 1 | 4 |
| 172 | 32 | 2 | 1 | 1 | 1 | 1 | 4 |
| 173 | 39 | 2 | 1 | 1 | 1 | 1 | 4 |
| 174 | 24 | 3 | 2 | 1 | 1 | 1 | 3 |
| 175 | 26 | 2 | 1 | 2 | 5 | 1 | 4 |
| 176 | 32 | 3 | 1 | 2 | 1 | 1 | 6 |
| 177 | 35 | 3 | 1 | 1 | 1 | 1 | 4 |
| 178 | 25 | 3 | 1 | 2 | 6 | 1 | 5 |
| 179 | 28 | 3 | 1 | 1 | 6 | 1 | 5 |
| 180 | 34 | 1 | 1 | 1 | 3 | 1 | 4 |
| 181 | 40 | 1 | 1 | 1 | 1 | 1 | 6 |
| 182 | 26 | 2 | 1 | 1 | 3 | 1 | 4 |
| 183 | 39 | 1 | 1 | 1 | 3 | 1 | 5 |
| 184 | 36 | 2 | 1 | 1 | 1 | 1 | 3 |
| 185 | 28 | 1 | 1 | 1 | 1 | 1 | 6 |
| 186 | 39 | 1 | 1 | 1 | 3 | 1 | 4 |
| 187 | 34 | 3 | 1 | 1 | 1 | 1 | 5 |
| 188 | 34 | 2 | 1 | 1 | 3 | 1 | 3 |
| 189 | 43 | 1 | 1 | 1 | 3 | 1 | 4 |
| 190 | 22 | 2 | 1 | 1 | 3 | 1 | 6 |
| 191 | 41 | 1 | 1 | 1 | 1 | 1 | 6 |
| 192 | 20 | 2 | 1 | 1 | 3 | 1 | 4 |
| 193 | 39 | 2 | 1 | 1 | 3 | 1 | 6 |
| 194 | 21 | 2 | 1 | 1 | 3 | 1 | 4 |
| 195 | 24 | 1 | 1 | 1 | 3 | 1 | 5 |
| 196 | 28 | 2 | 1 | 1 | 1 | 1 | 3 |
| 197 | 30 | 1 | 1 | 1 | 3 | 1 | 5 |
| 198 | 22 | 2 | 2 | 1 | 3 | 1 | 4 |
| 199 | 30 | 2 | 1 | 1 | 3 | 1 | 5 |
| 200 | 23 | 2 | 1 | 1 | 3 | 1 | 6 |
| 201 | 20 | 2 | 1 | 1 | 3 | 1 | 4 |
| 202 | 25 | 1 | 1 | 1 | 3 | 1 | 4 |
| 203 | 23 | 2 | 1 | 1 | 3 | 1 | 3 |
| 204 | 29 | 1 | 1 | 1 | 3 | 1 | 5 |
| 206 | 26 | 1 | 1 | 1 | 3 | 1 | 4 |
| 207 | 32 | 1 | 1 | 2 | 3 | 1 | 5 |
| 208 | 35 | 1 | 1 | 1 | 1 | 1 | 3 |
| 209 | 23 | 1 | 1 | 2 | 1 | 1 | 5 |
| 210 | 23 | 1 | 1 | 1 | 3 | 1 | 3 |
| 22  | 31 | 1 | 1 | 2 | 1 | 1 | 4 |
| 212 | 35 | 1 | 1 | 2 | 1 | 1 | 6 |
| 213 | 28 | 1 | 1 | 1 | 3 | 1 | 5 |
| 25  | 27 | 1 | 1 | 1 | 3 | 1 | 4 |

|     |    |   |   |   |             |   |   |
|-----|----|---|---|---|-------------|---|---|
| 215 | 32 | 2 | 1 | 2 | 1           | 1 | 5 |
| 215 | 30 | 2 | 2 | 1 | 1           | 1 | 3 |
| 216 | 20 | 2 | 1 | 1 | 1           | 1 | 3 |
| 217 | 35 | 2 | 1 | 1 | 4           | 1 | 4 |
| 218 | 26 | 2 | 1 | 1 | 5           | 1 | 5 |
| 219 | 22 | 2 | 1 | 1 | 3           | 1 | 5 |
| 221 | 36 | 1 | 1 | 1 | 3           | 1 | 3 |
| 222 | 23 | 2 | 1 | 1 | 3           | 1 | 5 |
| 223 | 30 | 2 | 1 | 1 | 1           | 1 | 6 |
| 224 | 45 | 1 | 1 | 1 | 3           | 1 | 3 |
| 225 | 30 | 1 | 1 | 1 | 3           | 1 | 6 |
| 226 | 26 | 2 | 1 | 1 | 3           | 1 | 3 |
| 227 | 23 | 2 | 1 | 1 | 5           | 1 | 5 |
| 228 | 21 | 2 | 1 | 1 | 3           | 1 | 3 |
| 229 | 30 | 2 | 1 | 1 | 1           | 1 | 5 |
| 230 | 27 | 2 | 1 | 1 | 3           | 1 | 5 |
| 231 | 35 | 1 | 1 | 1 | 3           | 1 | 4 |
| 369 | 32 | 2 | 1 | 2 | 4           | 1 | 6 |
| 244 | 40 | 1 | 1 | 1 | 3           | 1 | 3 |
| 245 | 35 | 1 | 1 | 2 | 1           | 1 | 6 |
| 246 | 26 | 1 | 1 | 1 | 3           | 1 | 6 |
| 247 | 30 | 2 | 1 | 1 | 3           | 1 | 4 |
| 248 | 30 | 2 | 1 | 1 | 1           | 1 | 6 |
| 249 | 26 | 1 | 1 | 1 | 3           | 1 | 4 |
| 250 | 32 | 4 | 1 | 2 | 1           | 1 | 5 |
| 251 | 31 | 3 | 1 | 1 | 1           | 1 | 3 |
| 252 | 28 | 3 | 1 | 2 | 1           | 1 | 4 |
| 253 | 20 | 1 | 1 | 1 | 1           | 1 | 5 |
| 254 | 31 | 4 | 1 | 1 | 4           | 1 | 3 |
| 255 | 30 | 2 | 1 | 1 | 1           | 1 | 6 |
| 414 | 24 | 3 | 1 | 1 | 1           | 1 | 3 |
| 257 | 25 | 2 | 1 | 1 | 1           | 1 | 6 |
| 258 | 27 | 2 | 1 | 1 | 5           | 1 | 3 |
| 259 | 27 | 3 | 1 | 2 | 6           | 1 | 3 |
| 260 | 29 | 2 | 1 | 1 | 3           | 1 | 6 |
| 261 | 28 | 2 | 1 | 1 | 3           | 1 | 4 |
| 262 | 26 | 2 | 1 | 1 | 5           | 1 | 6 |
| 263 | 27 | 3 | 1 | 1 | 1           | 1 | 6 |
| 264 | 25 | 2 | 1 | 1 | 6 Dressmake | 1 | 4 |
| 265 | 35 | 2 | 1 | 1 | 3           | 1 | 3 |
| 466 | 20 | 2 | 1 | 1 | 3           | 1 | 5 |
| 266 | 28 | 2 | 1 | 1 | 3           | 1 | 4 |
| 267 | 21 | 3 | 1 | 1 | 3           | 1 | 4 |
| 268 | 35 | 1 | 1 | 1 | 3           | 1 | 5 |
| 269 | 23 | 2 | 1 | 1 | 3           | 1 | 4 |
| 270 | 24 | 3 | 1 | 1 | 3           | 1 | 6 |
| 271 | 24 | 2 | 1 | 1 | 3           | 1 | 6 |

|     |    |   |   |   |             |   |   |
|-----|----|---|---|---|-------------|---|---|
| 272 | 21 | 2 | 1 | 2 | 1           | 1 | 4 |
| 273 | 26 | 2 | 1 | 1 | 3           | 1 | 4 |
| 274 | 23 | 2 | 1 | 1 | 3           | 1 | 3 |
| 275 | 35 | 2 | 1 | 1 | 3           | 1 | 6 |
| 276 | 24 | 2 | 1 | 1 | 3           | 1 | 3 |
| 277 | 20 | 2 | 1 | 1 | 6 Senstress | 1 | 5 |
| 278 | 25 | 2 | 1 | 1 | 3           | 1 | 5 |
| 279 | 23 | 1 | 1 | 1 | 3           | 1 | 4 |
| 280 | 35 | 2 | 1 | 1 | 1           | 1 | 5 |
| 281 | 37 | 3 | 1 | 2 | 1           | 1 | 4 |
| 282 | 25 | 3 | 1 | 1 | 1           | 1 | 6 |
| 283 | 37 | 2 | 1 | 1 | 1           | 1 | 4 |
| 284 | 27 | 3 | 1 | 1 | 1           | 1 | 6 |
| 285 | 23 | 2 | 1 | 1 | 1           | 1 | 4 |
| 286 | 25 | 2 | 1 | 1 | 3           | 1 | 4 |
| 287 | 26 | 2 | 1 | 1 | 1           | 1 | 5 |
| 288 | 23 | 2 | 1 | 1 | 3           | 1 | 3 |
| 289 | 28 | 1 | 1 | 1 | 3           | 1 | 6 |
| 290 | 37 | 1 | 1 | 1 | 3           | 1 | 3 |
| 291 | 42 | 1 | 1 | 1 | 3           | 1 | 5 |
| 292 | 45 | 2 | 1 | 1 | 3           | 1 | 4 |
| 293 | 31 | 1 | 1 | 2 | 3           | 1 | 3 |
| 294 | 40 | 1 | 1 | 1 | 3           | 1 | 4 |
| 295 | 30 | 2 | 1 | 1 | 3           | 1 | 6 |
| 296 | 25 | 1 | 1 | 1 | 3           | 1 | 4 |
| 297 | 26 | 2 | 1 | 1 | 3           | 1 | 3 |
| 298 | 20 | 1 | 1 | 1 | 3           | 1 | 5 |
| 299 | 29 | 2 | 1 | 1 | 3           | 1 | 3 |
| 456 | 38 | 1 | 1 | 1 | 3           | 1 | 6 |
| 320 | 32 | 2 | 2 | 2 | 1           | 1 | 4 |
| 95  | 40 | 1 | 1 | 1 | 1           | 1 | 6 |
| 115 | 32 | 2 | 1 | 2 | 3           | 1 | 4 |
| 427 | 38 | 1 | 1 | 2 | 3           | 1 | 5 |
| 309 | 28 | 2 | 1 | 1 | 3           | 1 | 4 |
| 311 | 21 | 2 | 1 | 1 | 3           | 1 | 4 |
| 313 | 32 | 2 | 1 | 1 | 1           | 1 | 4 |
| 314 | 32 | 1 | 1 | 1 | 3           | 1 | 5 |
| 315 | 29 | 2 | 1 | 1 | 5           | 1 | 4 |
| 316 | 20 | 2 | 1 | 1 | 1           | 1 | 4 |
| 317 | 32 | 1 | 1 | 1 | 1           | 1 | 6 |
| 318 | 22 | 3 | 1 | 1 | 1           | 1 | 5 |
| 319 | 24 | 3 | 1 | 1 | 1           | 1 | 3 |
| 320 | 32 | 2 | 2 | 2 | 3           | 1 | 5 |
| 321 | 25 | 2 | 1 | 1 | 1           | 1 | 6 |
| 329 | 34 | 2 | 1 | 1 | 1           | 1 | 4 |
| 322 | 33 | 2 | 1 | 1 | 1           | 1 | 5 |
| 323 | 30 | 2 | 1 | 1 | 3           | 1 | 5 |

|     |    |   |   |   |               |   |   |
|-----|----|---|---|---|---------------|---|---|
| 324 | 34 | 1 | 1 | 1 | 6 Smestrees   | 1 | 3 |
| 325 | 29 | 2 | 1 | 1 | 3             | 1 | 6 |
| 326 | 31 | 2 | 1 | 1 | 6 Hairdressei | 1 | 4 |
| 327 | 32 | 4 | 1 | 1 | 6 Caterer     | 1 | 5 |
| 328 | 31 | 3 | 1 | 1 | 1             | 1 | 6 |
| 329 | 34 | 2 | 1 | 1 | 1             | 1 | 4 |
| 330 | 27 | 2 | 1 | 1 | 2             | 1 | 4 |
| 331 | 24 | 1 | 1 | 1 | 1             | 1 | 5 |
| 332 | 38 | 2 | 1 | 1 | 1             | 1 | 6 |
| 333 | 23 | 2 | 1 | 1 | 1             | 1 | 5 |
| 334 | 24 | 2 | 1 | 2 | 3             | 1 | 4 |
| 335 | 27 | 2 | 1 | 1 | 1             | 1 | 6 |
| 336 | 23 | 2 | 1 | 1 | 1             | 1 | 4 |
| 337 | 24 | 2 | 1 | 1 | 1             | 1 | 5 |
| 338 | 24 | 2 | 1 | 1 | 3             | 1 | 4 |
| 339 | 34 | 1 | 1 | 1 | 1             | 1 | 6 |
| 340 | 35 | 4 | 1 | 1 | 4             | 1 | 6 |
| 341 | 25 | 2 | 1 | 1 | 1             | 1 | 4 |
| 342 | 32 | 2 | 1 | 1 | 4             | 1 | 5 |
| 343 | 23 | 2 | 1 | 1 | 1             | 1 | 5 |
| 344 | 25 | 2 | 1 | 1 | 1             | 1 | 3 |
| 345 | 32 | 2 | 1 | 1 | 1             | 1 | 6 |
| 346 | 29 | 4 | 1 | 1 | 4             | 1 | 5 |
| 347 | 35 | 2 | 1 | 1 | 1             | 1 | 3 |
| 348 | 22 | 2 | 1 | 1 | 1             | 1 | 4 |
| 349 | 27 | 2 | 1 | 1 | 1             | 1 | 5 |
| 350 | 24 | 2 | 1 | 1 | 3             | 1 | 3 |
| 351 | 27 | 2 | 1 | 2 | 1             | 1 | 6 |
| 352 | 41 | 4 | 1 | 2 | 6             | 1 | 5 |
| 353 | 24 | 2 | 1 | 1 | 1             | 1 | 5 |
| 354 | 34 | 2 | 1 | 2 | 3             | 1 | 4 |
| 355 | 32 | 3 | 1 | 2 | 3             | 1 | 4 |
| 356 | 30 | 4 | 1 | 2 | 3             | 1 | 5 |
| 357 | 35 | 1 | 1 | 1 | 1             | 1 | 6 |
| 358 | 31 | 2 | 1 | 1 | 1             | 1 | 3 |
| 359 | 28 | 2 | 1 | 1 | 1             | 1 | 6 |
| 360 | 23 | 2 | 1 | 1 | 1             | 1 | 3 |
| 361 | 27 | 2 | 1 | 1 | 1             | 1 | 4 |
| 362 | 30 | 1 | 1 | 2 | 3             | 1 | 4 |
| 363 | 25 | 2 | 1 | 1 | 6 semestress  | 1 | 6 |
| 364 | 31 | 2 | 1 | 1 | 1             | 1 | 6 |
| 365 | 32 | 2 | 1 | 1 | 3             | 1 | 3 |
| 366 | 26 | 2 | 1 | 2 | 3             | 1 | 5 |
| 367 | 35 | 1 | 1 | 1 | 3             | 1 | 4 |
| 368 | 27 | 3 | 1 | 1 | 1             | 1 | 5 |
| 369 | 32 | 2 | 1 | 2 | 3             | 1 | 4 |
| 370 | 36 | 1 | 1 | 2 | 3             | 1 | 3 |

|     |    |   |   |   |               |   |   |
|-----|----|---|---|---|---------------|---|---|
| 371 | 27 | 3 | 1 | 2 | 6             | 1 | 6 |
| 372 | 27 | 2 | 1 | 1 | 1             | 1 | 3 |
| 373 | 32 | 2 | 1 | 1 | 3             | 1 | 5 |
| 374 | 22 | 2 | 1 | 1 | 1             | 1 | 5 |
| 375 | 23 | 1 | 1 | 1 | 1             | 1 | 4 |
| 376 | 29 | 2 | 1 | 1 | 1             | 1 | 6 |
| 377 | 26 | 3 | 1 | 1 | 4             | 1 | 5 |
| 378 | 30 | 2 | 1 | 1 | 6 hairdresser | 1 | 4 |
| 379 | 30 | 2 | 1 | 1 | 5             | 1 | 5 |
| 380 | 22 | 3 | 1 | 2 | 6             | 1 | 4 |
| 381 | 26 | 2 | 1 | 1 | 4             | 1 | 3 |
| 382 | 26 | 2 | 1 | 1 | 1             | 1 | 5 |
| 383 | 26 | 2 | 1 | 1 | 1             | 1 | 3 |
| 384 | 26 | 2 | 1 | 1 | 5             | 1 | 3 |
| 385 | 35 | 2 | 1 | 1 | 5             | 1 | 4 |
| 386 | 27 | 2 | 1 | 1 | 5             | 1 | 5 |
| 387 | 33 | 3 | 1 | 1 | 5             | 1 | 6 |
| 388 | 28 | 2 | 1 | 1 | 5             | 1 | 3 |
| 389 | 28 | 2 | 1 | 1 | 5             | 1 | 6 |
| 390 | 33 | 1 | 1 | 1 | 3             | 1 | 5 |
| 391 | 25 | 3 | 1 | 1 | 3             | 1 | 4 |
| 392 | 27 | 3 | 1 | 1 | 4             | 1 | 5 |
| 393 | 26 | 2 | 1 | 2 | 4             | 1 | 5 |
| 394 | 29 | 2 | 1 | 1 | 1             | 1 | 4 |
| 395 | 28 | 2 | 1 | 1 | 1             | 1 | 3 |
| 396 | 35 | 2 | 1 | 1 | 1             | 1 | 6 |
| 397 | 29 | 2 | 1 | 1 | 1             | 1 | 5 |
| 398 | 41 | 1 | 1 | 1 | 1             | 1 | 3 |
| 399 | 25 | 2 | 1 | 1 | 1             | 1 | 6 |
| 400 | 26 | 2 | 1 | 1 | 1             | 1 | 2 |
| 401 | 24 | 1 | 1 | 1 | 1             | 1 | 4 |
| 402 | 26 | 3 | 1 | 1 | 4             | 1 | 3 |
| 403 | 28 | 1 | 1 | 1 | 1             | 1 | 5 |
| 404 | 28 | 2 | 1 | 2 | 3             | 1 | 5 |
| 405 | 27 | 2 | 1 | 2 | 3             | 1 | 5 |
| 406 | 33 | 4 | 1 | 1 | 1             | 1 | 4 |
| 407 | 28 | 4 | 1 | 2 | 3             | 1 | 3 |
| 408 | 27 | 4 | 1 | 1 | 4             | 1 | 4 |
| 409 | 34 | 3 | 1 | 1 | 4             | 1 | 4 |
| 410 | 30 | 2 | 1 | 1 | 1             | 1 | 3 |
| 411 | 41 | 1 | 1 | 2 | 3             | 1 | 6 |
| 412 | 26 | 4 | 1 | 1 | 4             | 1 | 4 |
| 413 | 28 | 3 | 1 | 2 | 3             | 1 | 6 |
| 414 | 24 | 3 | 1 | 1 | 1             | 1 | 6 |
| 415 | 20 | 2 | 1 | 1 | 1             | 1 | 4 |
| 416 | 43 | 1 | 1 | 1 | 1             | 1 | 4 |
| 417 | 31 | 4 | 1 | 1 | 4             | 1 | 3 |



|     |    |   |   |   |               |   |   |
|-----|----|---|---|---|---------------|---|---|
| 418 | 29 | 4 | 1 | 1 | 4             | 1 | 6 |
| 419 | 32 | 4 | 1 | 1 | 4             | 1 | 5 |
| 420 | 24 | 4 | 1 | 1 | 4             | 1 | 3 |
| 421 | 31 | 1 | 1 | 1 | 1             | 1 | 5 |
| 422 | 20 | 2 | 1 | 2 | 3             | 1 | 4 |
| 423 | 23 | 4 | 1 | 1 | 4             | 1 | 6 |
| 424 | 25 | 2 | 1 | 1 | 1             | 1 | 3 |
| 425 | 40 | 1 | 1 | 1 | 1             | 1 | 5 |
| 426 | 25 | 2 | 1 | 2 | 3             | 1 | 3 |
| 427 | 38 | 1 | 1 | 2 | 3             | 1 | 5 |
| 428 | 42 | 1 | 1 | 1 | 1             | 1 | 3 |
| 429 | 40 | 1 | 1 | 1 | 1 subsistence | 1 | 5 |
| 430 | 36 | 1 | 1 | 1 | 3             | 1 | 4 |
| 431 | 36 | 1 | 1 | 1 | 3             | 1 | 5 |
| 432 | 25 | 1 | 1 | 1 | 3             | 1 | 4 |
| 433 | 30 | 2 | 1 | 2 | 3             | 1 | 5 |
| 434 | 35 | 2 | 1 | 1 | 3             | 1 | 4 |
| 435 | 29 | 4 | 1 | 1 | 4             | 1 | 4 |
| 436 | 35 | 2 | 1 | 1 | 3             | 1 | 3 |
| 437 | 27 | 2 | 1 | 1 | 3             | 1 | 5 |
| 438 | 30 | 3 | 2 | 1 | 3             | 1 | 3 |
| 439 | 31 | 3 | 2 | 1 | 6 semestress  | 1 | 5 |
| 440 | 20 | 2 | 1 | 1 | 6 hairdresser | 1 | 3 |
| 441 | 25 | 2 | 1 | 1 | 6 hairdresser | 1 | 4 |
| 442 | 32 | 3 | 1 | 1 | 1             | 1 | 5 |
| 443 | 21 | 2 | 1 | 2 | 1             | 1 | 4 |
| 444 | 33 | 2 | 1 | 1 | 3             | 1 | 3 |
| 445 | 25 | 2 | 1 | 1 | 6 semestress  | 1 | 4 |
| 446 | 22 | 2 | 1 | 2 | 6             | 1 | 5 |
| 447 | 32 | 3 | 2 | 1 | 1             | 1 | 6 |
| 448 | 26 | 2 | 1 | 1 | 3             | 1 | 4 |
| 449 | 34 | 3 | 1 | 1 | 3             | 1 | 4 |
| 450 | 22 | 2 | 1 | 1 | 3             | 1 | 5 |
| 451 | 21 | 2 | 1 | 1 | 3             | 1 | 5 |
| 452 | 41 | 1 | 1 | 1 | 3             | 1 | 3 |
| 453 | 20 | 2 | 1 | 1 | 3             | 1 | 4 |
| 454 | 22 | 2 | 1 | 1 | 1             | 1 | 6 |
| 455 | 29 | 3 | 2 | 1 | 3             | 1 | 3 |
| 456 | 38 | 1 | 1 | 1 | 3             | 1 | 6 |
| 457 | 22 | 2 | 1 | 1 | 3             | 1 | 4 |
| 458 | 34 | 2 | 1 | 1 | 3             | 1 | 6 |
| 259 | 28 | 1 | 1 | 1 | 3             | 1 | 3 |
| 460 | 20 | 2 | 1 | 1 | 3             | 1 | 3 |
| 461 | 38 | 1 | 1 | 1 | 3             | 1 | 6 |
| 462 | 22 | 1 | 1 | 1 | 1             | 1 | 6 |
| 463 | 34 | 1 | 1 | 1 | 3             | 1 | 3 |
| 464 | 31 | 2 | 1 | 1 | 1             | 1 | 5 |

|     |    |   |   |   |   |   |   |
|-----|----|---|---|---|---|---|---|
| 465 | 28 | 1 | 1 | 1 | 3 | 1 | 3 |
| 467 | 37 | 2 | 1 | 1 | 3 | 1 | 5 |
| 468 | 34 | 1 | 1 | 1 | 3 | 1 | 3 |
| 469 | 30 | 2 | 1 | 1 | 3 | 1 | 5 |
| 470 | 31 | 3 | 1 | 1 | 3 | 1 | 5 |
| 471 | 32 | 1 | 1 | 1 | 3 | 1 | 4 |
| 472 | 35 | 1 | 1 | 1 | 3 | 1 | 3 |
| 473 | 39 | 2 | 1 | 1 | 3 | 1 | 6 |
| 474 | 26 | 4 | 1 | 2 | 3 | 1 | 4 |
| 475 | 32 | 1 | 1 | 1 | 3 | 1 | 3 |
| 476 | 24 | 1 | 1 | 1 | 3 | 1 | 5 |
| 477 | 30 | 2 | 1 | 1 | 3 | 1 | 5 |
| 478 | 26 | 2 | 1 | 1 | 3 | 1 | 3 |
| 479 | 43 | 1 | 1 | 1 | 1 | 1 | 3 |
| 480 | 24 | 1 | 1 | 1 | 1 | 1 | 5 |
| 481 | 22 | 2 | 1 | 1 | 3 | 1 | 5 |
| 482 | 28 | 1 | 1 | 1 | 3 | 1 | 6 |
| 483 | 33 | 1 | 1 | 1 | 3 | 1 | 3 |
| 484 | 22 | 2 | 1 | 1 | 3 | 1 | 4 |
| 485 | 20 | 2 | 1 | 1 | 3 | 1 | 6 |
| 486 | 29 | 1 | 1 | 1 | 3 | 1 | 4 |
| 487 | 36 | 2 | 1 | 1 | 5 | 1 | 6 |
| 488 | 35 | 2 | 1 | 1 | 3 | 1 | 5 |
| 489 | 23 | 2 | 1 | 1 | 3 | 1 | 4 |
| 490 | 32 | 1 | 1 | 1 | 3 | 1 | 5 |
| 491 | 33 | 1 | 1 | 1 | 3 | 1 | 6 |
| 492 | 26 | 2 | 1 | 1 | 3 | 1 | 3 |
| 493 | 24 | 2 | 1 | 1 | 3 | 1 | 6 |
| 494 | 26 | 2 | 1 | 1 | 3 | 1 | 6 |
| 495 | 24 | 2 | 1 | 1 | 3 | 1 | 3 |
| 496 | 34 | 1 | 1 | 1 | 3 | 1 | 4 |
| 497 | 29 | 2 | 1 | 1 | 3 | 1 | 6 |
| 498 | 37 | 4 | 1 | 1 | 1 | 1 | 6 |
| 499 | 30 | 1 | 1 | 1 | 1 | 1 | 4 |
| 500 | 21 | 2 | 1 | 1 | 1 | 1 | 6 |
| 501 | 23 | 2 | 1 | 1 | 3 | 1 | 6 |
| 502 | 40 | 1 | 1 | 1 | 1 | 1 | 3 |
| 503 | 23 | 2 | 1 | 1 | 1 | 1 | 6 |
| 504 | 30 | 1 | 1 | 1 | 1 | 1 | 4 |
| 505 | 35 | 1 | 1 | 1 | 1 | 1 | 6 |
| 506 | 38 | 1 | 1 | 1 | 3 | 1 | 4 |
| 507 | 41 | 1 | 1 | 1 | 3 | 1 | 3 |
| 508 | 32 | 1 | 1 | 1 | 3 | 1 | 6 |
| 509 | 27 | 3 | 2 | 1 | 3 | 1 | 4 |
| 510 | 28 | 1 | 1 | 2 | 3 | 1 | 6 |
| 511 | 35 | 1 | 1 | 1 | 3 | 1 | 3 |
| 512 | 25 | 2 | 1 | 1 | 3 | 1 | 6 |

|     |    |   |   |   |   |   |   |
|-----|----|---|---|---|---|---|---|
| 513 | 27 | 2 | 1 | 1 | 3 | 1 | 6 |
| 514 | 35 | 1 | 1 | 1 | 1 | 1 | 4 |
| 515 | 27 | 1 | 1 | 2 | 4 | 1 | 4 |
| 516 | 30 | 1 | 1 | 2 | 3 | 1 | 5 |
| 517 | 30 | 2 | 1 | 1 | 3 | 1 | 6 |
| 518 | 23 | 2 | 1 | 1 | 4 | 1 | 4 |
| 519 | 31 | 1 | 1 | 1 | 1 | 1 | 6 |
| 520 | 26 | 2 | 1 | 1 | 3 | 1 | 4 |
| 521 | 43 | 2 | 1 | 1 | 3 | 1 | 6 |
| 521 | 22 | 2 | 1 | 1 | 3 | 1 | 3 |
| 523 | 39 | 1 | 1 | 1 | 3 | 1 | 6 |
| 524 | 30 | 2 | 1 | 1 | 1 | 1 | 6 |
| 525 | 33 | 1 | 1 | 1 | 1 | 1 | 3 |
| 526 | 45 | 1 | 1 | 1 | 5 | 1 | 6 |
| 527 | 32 | 2 | 1 | 1 | 5 | 1 | 4 |
| 528 | 30 | 2 | 1 | 1 | 3 | 1 | 6 |
| 529 | 32 | 2 | 1 | 1 | 1 | 1 | 3 |
| 530 | 32 | 1 | 1 | 1 | 3 | 1 | 5 |
| 531 | 24 | 1 | 1 | 1 | 1 | 1 | 5 |
| 532 | 38 | 1 | 1 | 1 | 1 | 1 | 3 |
| 533 | 23 | 2 | 1 | 1 | 3 | 1 | 4 |
| 534 | 40 | 1 | 1 | 1 | 3 | 1 | 6 |
| 535 | 35 | 1 | 1 | 1 | 3 | 1 | 6 |
| 536 | 21 | 2 | 1 | 1 | 3 | 1 | 4 |
| 537 | 40 | 1 | 1 | 1 | 3 | 1 | 6 |
| 538 | 30 | 2 | 1 | 1 | 1 | 1 | 3 |
| 539 | 40 | 2 | 1 | 1 | 3 | 1 | 5 |
| 540 | 30 | 1 | 1 | 1 | 1 | 1 | 3 |
| 541 | 43 | 1 | 1 | 1 | 1 | 1 | 4 |
| 542 | 31 | 1 | 1 | 1 | 1 | 1 | 5 |
| 543 | 33 | 4 | 1 | 1 | 4 | 1 | 5 |
| 544 | 25 | 3 | 1 | 1 | 1 | 1 | 3 |
| 145 | 21 | 1 | 1 | 1 | 1 | 1 | 6 |
| 146 | 30 | 4 | 1 | 1 | 4 | 1 | 3 |
| 147 | 28 | 2 | 1 | 1 | 5 | 1 | 4 |
| 548 | 23 | 1 | 1 | 1 | 3 | 1 | 5 |
| 149 | 32 | 4 | 1 | 1 | 4 | 1 | 5 |
| 550 | 26 | 1 | 2 | 1 | 1 | 1 | 4 |
| 551 | 38 | 2 | 1 | 1 | 3 | 1 | 6 |
| 552 | 25 | 2 | 2 | 1 | 5 | 1 | 3 |
| 553 | 30 | 2 | 1 | 1 | 5 | 1 | 5 |
| 554 | 34 | 4 | 1 | 1 | 4 | 1 | 4 |
| 555 | 28 | 2 | 1 | 1 | 1 | 1 | 3 |
| 556 | 27 | 2 | 1 | 1 | 1 | 1 | 3 |
| 557 | 35 | 2 | 1 | 1 | 5 | 1 | 4 |
| 558 | 29 | 2 | 1 | 1 | 1 | 1 | 3 |
| 559 | 31 | 2 | 1 | 1 | 1 | 1 | 6 |

|     |    |   |   |   |   |   |   |
|-----|----|---|---|---|---|---|---|
| 560 | 28 | 2 | 1 | 1 | 1 | 1 | 3 |
| 561 | 28 | 2 | 1 | 1 | 5 | 1 | 5 |
| 562 | 24 | 1 | 1 | 1 | 4 | 1 | 3 |
| 563 | 30 | 1 | 1 | 1 | 5 | 1 | 5 |
| 564 | 26 | 2 | 1 | 1 | 1 | 1 | 4 |
| 565 | 28 | 4 | 1 | 1 | 4 | 1 | 5 |
| 566 | 25 | 2 | 1 | 2 | 3 | 1 | 3 |
| 567 | 25 | 2 | 1 | 1 | 3 | 1 | 6 |
| 568 | 39 | 2 | 1 | 1 | 1 | 1 | 3 |
| 569 | 30 | 4 | 1 | 1 | 4 | 1 | 6 |
| 570 | 33 | 4 | 1 | 1 | 4 | 1 | 6 |
| 571 | 34 | 3 | 1 | 1 | 4 | 1 | 4 |
| 572 | 25 | 4 | 1 | 1 | 1 | 1 | 4 |
| 223 | 30 | 2 | 1 | 1 | 1 | 1 | 5 |

| D1Whatistl Gender | D3Dateofb   | D5twhatstc | D6BREASTF | Contracept | E2IfNOWhy   | E3Ifyeswha | E4Iftraditioi |
|-------------------|-------------|------------|-----------|------------|-------------|------------|---------------|
| rhaner            | 2 2-Mar-12  | #NULL!     | 26        | 1          |             | 2          |               |
| techiga joa       | 2 11-Apr-14 | #NULL!     | 30        | 1          |             | 2          |               |
| noah akany        | 1 11-Feb-16 | #NULL!     | 12        | 1          |             | 2          |               |
| kelvin enoc       | 1 17-Dec-16 | #NULL!     | 14        | 2          | due to fina | #NULL!     |               |
| maduna sa         | 2 12-Aug-12 | #NULL!     | 24        | 1          |             | 2          |               |
| kofi              | 1 #####     | #NULL!     | 24        | 1          |             | 2          |               |
| kudus inus:       | 1 21-Apr-16 | #NULL!     | 15        | 2          |             | #NULL!     |               |
|                   | 1 28-Dec-16 | #NULL!     | 11        | 2          | because I k | #NULL!     |               |
| godgon lag        | 1 19-Jul-11 | #NULL!     | 24        | 1          |             | 2          |               |
| adagwine v        | 2 1-Jan-16  | #NULL!     | 24        | 1          |             | 2          |               |
| melody ab:        | 2 1-Mar-16  | #NULL!     | 10        | 1          |             | 2          |               |
| delfiria asa      | 2 #####     | #NULL!     | 24        | 2          | no reason { | #NULL!     |               |
| sunday kw         | 1 3-Nov-15  | #NULL!     | 15        | 2          |             | #NULL!     |               |
| emma koliy        | 1 8-Nov-15  | #NULL!     | 24        | 2          | no reason { | #NULL!     |               |
| eunie wew         | 2 18-Aug-05 | #NULL!     | 24        | 1          |             | 2          |               |
| mepiah we         | 2 12-Feb-16 | #NULL!     | 11        | 1          |             | 2          |               |
| wepiah ayil       | 2 29-Aug-14 | #NULL!     | 24        | 2          |             | #NULL!     |               |
| Adyei emm         | 1 7-Dec-16  | #NULL!     | 12        | 1          |             | 2          |               |
| Richard bas       | 1 19-Nov-15 | #NULL!     | 16        | 2          |             | #NULL!     |               |
| sabastian         | 1 5-Aug-10  | #NULL!     | 24        | 1          |             | 2          |               |
| safia womc        | 2 24-Feb-11 | #NULL!     | 26        | 1          |             | 2          |               |
| theodora a        | 2 20-Feb-16 | #NULL!     | 8         | 1          |             | 2          |               |
| geofrey           | 1 #####     | #NULL!     | 27        | 2          |             | #NULL!     |               |
| cyndy adet        | 2 2-Feb-16  | #NULL!     | 13        | 1          |             | 2          |               |
| donald adiy       | 1 28-Jan-11 | #NULL!     | 14        | 1          |             | 2          |               |
| dorothy as:       | 2 7-Jul-10  | #NULL!     | 25        | 2          |             | #NULL!     |               |
| angel asaw        | 2 9-Nov-13  | #NULL!     | 24        | 2          | i don't wan | #NULL!     |               |
| dorothy           | 2 20-Nov-15 | #NULL!     | 10        | 1          |             | 2          |               |
| sabina abiii      | 2 10-Nov-09 | #NULL!     | 36        | 1          |             | 2          |               |
| prince            | 1 20-Apr-16 | #NULL!     | 24        | 1          |             | 2          |               |
| macel ason        | 2 2-Mar-16  | #NULL!     | 12        | 2          |             | #NULL!     |               |
| amintenga         | 1 26-Nov-13 | #NULL!     | 15        | 1          |             | 2          |               |
| foster atan       | 1 1-Apr-11  | #NULL!     | 27        | 1          |             | 2          |               |
| patience          | 2 20-Jun-13 | #NULL!     | 25        | 2          |             | #NULL!     |               |
| Issabella         | 2 3-Nov-15  | #NULL!     | 13        | 2          |             | #NULL!     |               |
| wilfred           | 1 12-Apr-16 | #NULL!     | 8         | 1          |             | 2          |               |
| noah kumu         | 1 26-Jan-14 | #NULL!     | 29        | 1          |             | 2          |               |
| 1shmael ac        | 1 20-Jun-13 | #NULL!     | 14        | 1 2        |             | 2          |               |
| lda awepor        | 2 2-Apr-16  | #NULL!     | 11        | 2          |             | #NULL!     |               |
| eugiene m:        | 1 4-Nov-15  | #NULL!     | 12        | 1          |             | 2          |               |
| modicai aw        | 1 25-Nov-11 | #NULL!     | 26        | 1          |             | 2          |               |
| prince adol       | 1 16-Apr-16 | #NULL!     | 9         | 1          |             | 2          |               |
| prince adol       | 1 16-Jul-14 | #NULL!     | 12        | 1          |             | 2          |               |
| atapOre A         | 1 9-Jan-11  | #NULL!     | 24        | 1          |             | 2          |               |
| Mavis awal        | 2 22-Jul-12 | #NULL!     | 30        | 1          |             | 2          |               |
| jeremiah          | 1 1-Apr-16  | #NULL!     | 24        | 2          |             | #NULL!     |               |

|               |   |           |        |    |   |                     |
|---------------|---|-----------|--------|----|---|---------------------|
| Mavis Awa     | 2 | 22-Jul-12 | #NULL! | 30 | 1 | 2                   |
| osman ali     | 1 | 17-Feb-16 | #NULL! | 13 | 1 | 2                   |
| Daniel akol   | 1 | 8-Feb-13  | #NULL! | 24 | 2 | #NULL!              |
| Frank atore   | 1 | 5-Feb-16  | #NULL! | 24 | 2 | #NULL!              |
| Jeremia Azı   | 1 | 2-Dec-16  | #NULL! | 11 | 2 | #NULL!              |
| Morris        | 1 | 24-Aug-12 | #NULL! | 24 | 2 | #NULL!              |
| solomon aq    | 1 | 11-Dec-15 | #NULL! | 10 | 1 | 2                   |
| ibrahim       | 1 | 28-Apr-15 | #NULL! | 12 | 2 | #NULL!              |
| foster yaro   | 1 | 6-Feb-11  | #NULL! | 25 | 2 | #NULL!              |
| sandra        | 2 | 28-Nov-15 | #NULL! | 13 | 1 | 2                   |
| nana asakir   | 1 | 4-Nov-15  | #NULL! | 14 | 2 | #NULL!              |
|               | 1 | 30-Nov-14 | 1      | 13 | 2 | #NULL!              |
| doris ayisib  | 2 | 5-Oct-13  | #NULL! | 26 | 2 | #NULL!              |
| patrick surr  | 1 | 25-Dec-12 | #NULL! | 30 | 1 | 2                   |
| gilbert anoq  | 1 | 5-Jul-14  | #NULL! | 7  | 1 | 2                   |
| roger         | 1 | #####     | #NULL! | 27 | 2 | #NULL!              |
| fidams awii   | 2 | 7-Apr-16  | #NULL! | 11 | 1 | 2                   |
| priscila      | 2 | 10-Oct-14 | #NULL! | 24 | 2 | #NULL!              |
| rita anagbir  | 2 | 16-Apr-12 | #NULL! | 26 | 2 | he travelec #NULL!  |
| paba queer    | 2 | 22-Feb-16 | #NULL! | 15 | 2 | husband in #NULL!   |
| atingane lir  | 1 | 26-Nov-14 | #NULL! | 26 | 2 | #NULL!              |
| akentoa       | 1 | 12-Mar-13 | #NULL! | 24 | 2 | #NULL!              |
| nancy         | 2 | 30-Dec-15 | #NULL! | 12 | 1 | 1 breastfeeding     |
| suzana aka    | 2 | 1-Jun-14  | #NULL! | 24 | 2 | #NULL!              |
| elisha asilal | 1 | 9-Mar-16  | #NULL! | 10 | 2 | wasnt livinq #NULL! |
| sophia        | 2 | 28-Dec-15 | #NULL! | 14 | 2 | #NULL!              |
| victor        | 1 | 13-Nov-14 | #NULL! | 24 | 2 | it causes si #NULL! |
| atobakew z    | 2 | #####     | #NULL! | 21 | 2 | #NULL!              |
| anutua aye    | 2 | 10-Nov-15 | #NULL! | 13 | 2 | causes infe #NULL!  |
| portia        | 2 | 15-Oct-13 | #NULL! | 18 | 2 | nothig #NULL!       |
| benedicta     | 2 | 10-Apr-16 | #NULL! | 12 | 1 | 2                   |
| 1             | 1 | 20-Nov-14 | #NULL! | 26 | 2 | nothing #NULL!      |
| joyce         | 2 | 22-Apr-16 | #NULL! | 13 | 1 | 2                   |
| bansford      | 1 | 2-Mar-11  | #NULL! | 28 | 1 | 2                   |
| gideon        | 1 | #####     | #NULL! | 30 | 2 | he wont ag 2        |
| martha        | 2 | 11-Mar-16 | #NULL! | 10 | 1 | 2                   |
| evans         | 1 | 2-Mar-13  | #NULL! | 24 | 2 | #NULL!              |
| akampati      | 2 | 19-Sep-12 | #NULL! | 24 | 1 | 2                   |
| maxwel        | 1 | 28-Nov-15 | 1      | 12 | 2 | #NULL!              |
| asaah godv    | 1 | 10-Jan-13 | #NULL! | 24 | 2 | i dont want #NULL!  |
| demian asa    | 1 | 21-Apr-13 | #NULL! | 24 | 1 | 2                   |
| elen          | 2 | 15-Nov-15 | 1      | 13 | 1 | 2                   |
| lovia azii    | 2 | 8-Aug-14  | #NULL! | 24 | 1 | 2                   |
| abena mya     | 2 | 19-Jan-16 | #NULL! | 9  | 2 | #NULL!              |
| prince agar   | 1 | 31-Oct-11 | #NULL! | 24 | 2 | i dontwant #NULL!   |
| atinga atei   | 2 | 10-Nov-15 | #NULL! | 31 | 1 | 2                   |
| joshua awu    | 1 | 15-Dec-15 | #NULL! | 14 | 2 | #NULL!              |

|              |   |           |        |    |                |        |
|--------------|---|-----------|--------|----|----------------|--------|
| james atazi  | 1 | 22-Feb-13 | #NULL! | 20 | 2              | #NULL! |
| felicia abug | 2 | 18-Feb-16 | #NULL! | 7  | 2              | #NULL! |
| Azure chris  | 2 | 17-Oct-13 | #NULL! | 25 | 1              | 2      |
| Janet Akan   | 2 | #####     | #NULL! | 11 | 2              | #NULL! |
| janet        | 2 | 20-Jun-13 | #NULL! | 24 | 2              | #NULL! |
| Asumbono     | 1 | 1-Dec-15  | #NULL! | 12 | 2              | #NULL! |
| maxwell      | 1 | 2-Dec-12  | #NULL! | 30 | 2              | #NULL! |
| Joyce        | 2 | 23-Apr-16 | #NULL! | 7  | 2              | #NULL! |
| Blessing     | 2 | 13-Apr-12 | #NULL! | 24 | 2 Husband liv  | #NULL! |
| Benedicta    | 2 | 26-Dec-15 | #NULL! | 24 | 1              | 2      |
| Ismael       | 1 | 2-Jun-13  | #NULL! | 30 | 1              | 2      |
| Adombire     | 1 | 12-Mar-15 | #NULL! | 11 | 1              | 2      |
| Anuse        | 2 | 3-May-11  | #NULL! | 30 | 2 Wasn't livir | #NULL! |
| Christabel   | 2 | 2-Jan-14  | #NULL! | 28 | 2 living separ | #NULL! |
| matilda      | 2 | 10-Jun-11 | #NULL! | 26 | 2              | #NULL! |
| Dorothy      | 2 | 26-Apr-16 | #NULL! | 10 | 1              | 2      |
| issabela     | 2 | 20-Nov-15 | #NULL! | 8  | 1              | 2      |
|              | 1 | 27-Jan-15 | #NULL! | 13 | 2              | #NULL! |
| Saviour      | 1 | 29-Aug-12 | #NULL! | 24 | 2              | #NULL! |
| sampson      | 1 | #####     | #NULL! | 10 | 2              | #NULL! |
| Roland       | 1 | 20-Jul-13 | #NULL! | 24 | 2              | #NULL! |
| Jeremiah     | 1 | 6-Sep-12  | #NULL! | 24 | 2              | #NULL! |
| Achaawine    | 1 | 28-Jan-15 | #NULL! | 12 | 2              | #NULL! |
| Awinpoka     | 2 | 5-Nov-12  | #NULL! | 25 | 2 not interes  | #NULL! |
| Nicholas     | 1 | 6-Apr-12  | #NULL! | 34 | 2 Nothing      | #NULL! |
| Zidina       | 2 | 24-Nov-15 | #NULL! | 11 | 2              | 2      |
| Rukaya       | 2 | 10-Jan-15 | #NULL! | 17 | 2 pregnancy    | #NULL! |
| Edmund       | 1 | 9-Jan-14  | #NULL! | 30 | 2 nothing      | #NULL! |
| Samuela      | 2 | 26-Feb-16 | #NULL! | 14 | 1              | 2      |
| Abigail      | 2 | 25-Oct-12 | #NULL! | 24 | 1              | 2      |
| Adinam       | 1 | 22-Dec-15 | #NULL! | 9  | 1              | 2      |
| Derick       | 1 | 16-Dec-15 | #NULL! | 14 | 1              | 2      |
| Evans        | 1 | 7-Oct-13  | #NULL! | 30 | 1              | 2      |
| Angela       | 2 | 29-Nov-15 | #NULL! | 12 | 2 nothing      | #NULL! |
| Nillu        | 2 | 2-Jul-10  | #NULL! | 24 | 1              | 2      |
| Ayamba       | 1 | 9-Aug-13  | #NULL! | 27 | 2              | #NULL! |
| Lovia        | 2 | 6-Dec-16  | 2      | 12 | 2              | #NULL! |
| Dominic      | 1 | 9-Feb-13  | #NULL! | 24 | 1              | 2      |
| Stephen      | 2 | 1-Mar-16  | #NULL! | 13 | 2              | #NULL! |
| christian    | 1 | 9-Nov-13  | #NULL! | 24 | 1              | 2      |
| Calvin       | 1 | 1-Mar-16  | #NULL! | 7  | 1              | 2      |
| Mabel        | 2 | 7-Mar-14  | #NULL! | 24 | 1              | 2      |
| Bright       | 2 | 21-Nov-15 | #NULL! | 16 | 1              | 2      |
| Mary         | 2 | 24-Dec-15 | #NULL! | 14 | 1              | 2      |
| Asobila      | 2 | 30-Jul-14 | #NULL! | 24 | 1              | 2      |
| Agoah        | 1 | 10-Dec-16 | #NULL! | 12 | 2              | #NULL! |
| Martin       | 1 | #####     | #NULL! | 10 | 1              | 2      |

|            |   |           |        |    |   |              |              |
|------------|---|-----------|--------|----|---|--------------|--------------|
| Anaba      | 1 | 11-Dec-10 | #NULL! | 24 | 2 | i dont want  | #NULL!       |
| litucia    | 2 | 24-Mar-15 | #NULL! | 11 | 2 | not willing  | #NULL!       |
| Blessing   | 2 | 27-Feb-14 | #NULL! | 25 | 1 |              | 2            |
| imoro      | 1 | 3-Jun-14  | #NULL! | 18 | 1 |              | 2            |
| kofi       | 1 | 1-Mar-14  | #NULL! | 12 | 2 |              | #NULL!       |
| Douglas    | 1 | 6-Dec-16  | #NULL! | 15 | 1 |              | 2            |
| Daniela    | 2 | 15-Nov-15 | #NULL! | 16 | 1 |              | 2            |
| samuel     | 1 | 7-Mar-15  | #NULL! | 12 | 1 |              | 2            |
| paschal    | 1 | 21-Nov-15 | #NULL! | 6  | 1 |              | 1 calender m |
| Joshua     | 1 | 3-Jan-05  | #NULL! | 24 | 1 |              | 2            |
| Haruna     | 1 | 25-Nov-15 | #NULL! | 15 | 1 |              | 2            |
| sadia      | 2 | 1-Jan-13  | #NULL! | 24 | 2 | nothing      | #NULL!       |
| Alberta    | 2 | 15-Oct-13 | #NULL! | 20 | 2 | side effects | #NULL!       |
| Jerry      | 1 | 11-Nov-15 | #NULL! | 9  | 1 |              | 2            |
| Abagna     | 1 | 29-Mar-12 | #NULL! | 29 | 2 | nothing      | #NULL!       |
| macurius   | 1 | 17-Jan-16 | #NULL! | 24 | 2 | nothing      | #NULL!       |
| Nchoyure   | 1 | 29-Mar-12 | #NULL! | 26 | 2 | nothing      | #NULL!       |
|            | 2 | 27-Feb-16 | #NULL! | 12 | 1 |              | 2            |
| richard    | 1 | 25-Sep-09 | #NULL! | 18 | 2 | nothing      | #NULL!       |
| ruth       | 2 | 12-Dec-15 | #NULL! | 11 | 1 |              | 2            |
| Sylvester  | 1 | 19-Aug-14 | #NULL! | 24 | 1 |              | 2            |
| Helen      | 2 | 20-Apr-16 | #NULL! | 10 | 2 | nothing      | #NULL!       |
| joshua     | 1 | 21-Dec-15 | #NULL! | 14 | 1 |              | 2            |
| mauricia   | 2 | 14-Oct-12 | #NULL! | 26 | 2 | nothing      | #NULL!       |
| Bright     | 1 | 6-Aug-10  | #NULL! | 36 | 1 |              | 2            |
|            | 2 | 20-Dec-15 | #NULL! | 13 | 2 |              | #NULL!       |
| Jennifer   | 2 | 20-Mar-10 | #NULL! | 27 | 1 |              | 2            |
| kingley    | 1 | 29-Nov-15 | #NULL! | 14 | 2 |              | #NULL!       |
| nancy      | 2 | 31-Aug-13 | #NULL! | 24 | 1 |              | 2            |
| saviour    | 1 | 9-Mar-16  | #NULL! | 11 | 1 |              | 2            |
| Gideon     | 1 | #####     | #NULL! | 28 | 1 |              | 2            |
| theophilus | 1 | 8-Nov-15  | #NULL! | 12 | 2 |              | #NULL!       |
| Blessing   | 2 | 12-Oct-17 | #NULL! | 28 | 1 |              | 2            |
| Prince     | 1 | 1-Jun-11  | #NULL! | 24 | 2 | nothing      | #NULL!       |
| Godfred    | 1 | 20-Dec-15 | #NULL! | 14 | 2 | nothing      | #NULL!       |
| justice    | 1 | 20-Feb-16 | #NULL! | 24 | 1 |              | 2            |
| Stephen    | 1 | #####     | #NULL! | 9  | 2 |              | #NULL!       |
| Hannah     | 2 | 8-Nov-14  | #NULL! | 18 | 2 |              | #NULL!       |
| lovia      | 2 | 14-Nov-15 | #NULL! | 15 | 2 |              | #NULL!       |
| willifred  | 1 | 24-Feb-14 | #NULL! | 24 | 2 | was divorc   | #NULL!       |
| millicent  | 2 | 9-Dec-15  | #NULL! | 14 | 1 |              | 2            |
| portia     | 2 | 11-Jul-14 | #NULL! | 24 | 2 |              | #NULL!       |
| maxwell    | 1 | 11-Feb-16 | #NULL! | 8  | 1 |              | 2            |
| philomina  | 2 | 27-Nov-15 | #NULL! | 11 | 2 | didnt have   | #NULL!       |
| evelyn     | 2 | 20-Feb-10 | #NULL! | 36 | 2 | ever had a   | #NULL!       |
| Elijah     | 1 | 5-Sep-14  | #NULL! | 28 | 1 |              | 2            |
| Gabriel    | 1 | 9-Dec-15  | #NULL! | 11 | 2 |              | #NULL!       |



|             |   |           |        |    |               |             |
|-------------|---|-----------|--------|----|---------------|-------------|
| magdalene   | 2 | 2-Nov-13  | #NULL! | 24 | 2             | #NULL!      |
| Romina Atz  | 2 | 11-Jun-16 | #NULL! | 13 | 1             | 2           |
| Fancy Akay  | 1 | 9-Jan-12  | #NULL! | 10 | 2             | #NULL!      |
| Barthy Aka  | 2 | 9-Dec-15  | #NULL! | 9  | 1             | 2           |
| Blesseng Ai | 2 | 12-Apr-13 | #NULL! | 24 | 1             | 2           |
| Emmanuel    | 2 | 25-Dec-14 | #NULL! | 18 | 1             | 2           |
| Bugawe      | 1 | 11-Feb-16 | #NULL! | 13 | 1             | 2           |
| Welaga Sal  | 2 | #####     | #NULL! | 26 | 2             | #NULL!      |
| Anuboom     | 2 | 30-Aug-13 | #NULL! | 27 | 1             | 2           |
| Asagiba M   | 1 | 30-Jan-16 | #NULL! | 10 | 1             | 2           |
| Kumangtio   | 1 | 20-Feb-12 | #NULL! | 17 | 2             | #NULL!      |
| Kuyibanyir  | 2 | 25-Feb-16 | #NULL! | 12 | 2             | #NULL!      |
| Abongidew   | 2 | 4-Jun-13  | #NULL! | 24 | 1             | 2           |
| Asubataank  | 2 | 26-Mar-16 | #NULL! | 12 | 2             | #NULL!      |
| Ophelia Baj | 2 | 31-Aug-14 | #NULL! | 24 | 1             | 2           |
| Ernest      | 1 | 21-Jul-13 | #NULL! | 20 | 2             | #NULL!      |
| Wese        | 1 | 30-Nov-15 | #NULL! | 13 | 1             | 2           |
| sivea       | 2 | 25-Oct-03 | #NULL! | 24 | 1             | 1           |
| Kaduah Kw   | 2 | 21-Feb-16 | 2      | 12 | 2             | #NULL!      |
| Regiaald Ac | 1 | 11-Nov-12 | #NULL! | 26 | 1             | 2           |
| Bapinwo     | 1 | 12-Dec-10 | #NULL! | 24 | 1             | 2           |
| Philomina I | 2 | 20-Nov-15 | #NULL! | 15 | 1             | 2           |
| Benedecta   | 2 | 20-Nov-11 | #NULL! | 26 | 2             | #NULL!      |
| Matilda Aje | 2 | 11-Dec-15 | #NULL! | 11 | 1             | 2           |
| Shennel     | 2 | 29-Dec-14 | #NULL! | 18 | 1             | 1 Menstrual |
| juliet amey | 2 | 4-Apr-16  | #NULL! | 12 | 2 I wanted to | #NULL!      |
|             | 2 | 18-Dec-15 | #NULL! | 10 | 2             | #NULL!      |
| Salam Mun   | 1 | 15-Jun-13 | #NULL! | 24 | 1             | 2           |
| Lordlugard  | 1 | 4-Apr-16  | #NULL! | 11 | 1             | 2           |
| Justice We  | 1 | 17-Dec-10 | #NULL! | 26 | 1             | 2           |
| Stanley     | 1 | 28-Feb-16 | #NULL! | 14 | 1             | 2           |
| Emmanuel    | 1 | #####     | #NULL! | 19 | 1             | 2           |
| Jessica Am  | 2 | 10-Apr-16 | #NULL! | 26 | 1             | 1 menstrual |
| Elenor Akai | 2 | 27-Mar-16 | #NULL! | 10 | 1             | 2           |
| Hager Awir  | 2 | 2-Jul-10  | #NULL! | 24 | 1             | 2           |
| Theophelus  | 1 | 30-Dec-15 | #NULL! | 13 | 1             | 2           |
| Jonas Wen   | 1 | 13-Jan-12 | #NULL! | 16 | 1             | 2           |
| Alberta     | 2 | 17-Oct-08 | #NULL! | 24 | 2 Nothing     | #NULL!      |
| Joel        | 1 | 21-Dec-15 | #NULL! | 12 | 1             | 2           |
| Apana       | 2 | 30-Jan-16 | #NULL! | 10 | 2             | #NULL!      |
| ayidana act | 1 | 5-Jun-13  | #NULL! | 29 | 1             | 2           |
| Tibiru Adur | 1 | 18-Sep-16 | #NULL! | 28 | 2             | #NULL!      |
| LIONCY WE   | 2 | 18-Dec-15 | #NULL! | 14 | 2             | #NULL!      |
| Enestina K  | 1 | 28-Dec-12 | #NULL! | 24 | 2             | #NULL!      |
| Gabriel Ay  | 1 | 10-Nov-15 | #NULL! | 11 | 1             | 2           |
| Joseph Aku  | 1 | 28-Jul-13 | #NULL! | 16 | 1             | 2           |
| Bismark     | 1 | #####     | #NULL! | 37 | 2 My husban   | #NULL!      |

|              |   |           |        |    |   |              |        |
|--------------|---|-----------|--------|----|---|--------------|--------|
| Olivia       | 2 | 28-Nov-15 | #NULL! | 10 | 2 | I do not kn  | #NULL! |
| Michael      | 1 | 10-Dec-15 | #NULL! | 13 | 2 |              | #NULL! |
| Naomi        | 2 | 26-Jan-16 | #NULL! | 24 | 2 | I was not m  | #NULL! |
| Wepaare      | 1 | 30-Nov-09 | #NULL! | 25 | 2 |              | #NULL! |
| Balolugu     | 2 | 30-Apr-16 | #NULL! | 12 | 1 |              | 2      |
| Rebecca      | 2 | #####     | #NULL! | 25 | 1 |              | 2      |
| Burawuven    | 2 | 23-Aug-13 | #NULL! | 30 | 2 | Nothing      | #NULL! |
| rahinatu     | 2 | 20-Dec-15 | #NULL! | 12 | 2 | Nothing      | #NULL! |
| Wedadeba     | 1 | 30-Nov-13 | #NULL! | 26 | 2 |              | #NULL! |
|              | 1 | 1-Dec-15  | #NULL! | 12 | 2 | IShe did no  | #NULL! |
| Lilibert     | 2 | 8-May-10  | #NULL! | 24 | 1 |              | 2      |
| Gilbert      | 1 | 8-Dec-15  | #NULL! | 9  | 2 | Nothing      | #NULL! |
| Osbert       | 1 | #####     | #NULL! | 19 | 1 |              | 2      |
| Kolalam      | 2 | 1-Mar-15  | #NULL! | 10 | 2 | It did not k | #NULL! |
| Wenawom      | 1 | 8-Dec-15  | #NULL! | 8  | 1 |              | 2      |
| Christiana   | 2 | 13-Nov-13 | #NULL! | 24 | 2 | My husban    | #NULL! |
| Kadua Edm    | 2 | 1-Nov-15  | #NULL! | 14 | 2 | Nothing      | #NULL! |
| Afia         | 2 | 26-Jun-11 | #NULL! | 36 | 2 | Nothing      | #NULL! |
| Clinton Kw   | 1 | 12-Dec-15 | #NULL! | 14 | 2 |              | #NULL! |
| Monday Ak    | 1 | 30-Nov-13 | #NULL! | 36 | 2 |              | #NULL! |
| Tigase       | 1 | 30-Nov-15 | #NULL! | 12 | 1 |              | 2      |
| Bebelanwe    | 2 | 20-Dec-15 | 1      | 7  | 2 | Husband has  | #NULL! |
| Batachem I   | 2 | 10-Nov-14 | #NULL! | 24 | 2 | No reason    | #NULL! |
| Yorose We:   | 1 | 20-Jun-12 | #NULL! | 36 | 2 | Husband tr   | #NULL! |
| Webalora \   | 1 | 11-Feb-16 | #NULL! | 26 | 1 |              | 2      |
| Songose W    | 1 | 1-Nov-15  | #NULL! | 12 | 2 | No reason    | #NULL! |
| Kwodama I    | 1 | 10-Nov-14 | #NULL! | 24 | 2 | No reason    | #NULL! |
| Judth Seizu  | 2 | 22-Jan-16 | #NULL! | 6  | 1 |              | 2      |
| aziseri agar | 1 | 26-Jun-11 | #NULL! | 24 | 1 |              | 2      |
| Wisdom Ak    | 1 | 20-Dec-16 | #NULL! | 16 | 2 | Nothing      | #NULL! |
| akentoa      | 1 | 12-Mar-13 | #NULL! | 24 | 2 |              | #NULL! |
| elen         | 2 | 13-Dec-15 | 2      | 10 | 1 |              | 2      |
| babalewe a   | 1 | 11-Oct-13 | #NULL! | 24 | 1 |              | 2      |
| Webalaibal   | 1 | 1-Jan-13  | #NULL! | 30 | 1 |              | 2      |
| Claudia      | 2 | 1-Nov-15  | #NULL! | 12 | 2 | Nothing      | #NULL! |
| Gerald Juju  | 1 | 4-Dec-15  | #NULL! | 13 | 2 | Nothing      | #NULL! |
| Asenawine    | 1 | 20-Jun-12 | #NULL! | 30 | 1 |              | 2      |
| Edmond Ak    | 1 | 20-Dec-15 | #NULL! | 2  | 1 |              | 2      |
| Wetagea D    | 1 | 10-Nov-15 | #NULL! | 8  | 2 | Nothing      | #NULL! |
| Israel Agye; | 1 | 30-Oct-11 | #NULL! | 24 | 2 |              | #NULL! |
| Abigail      | 2 | 30-Oct-13 | #NULL! | 22 | 2 | No reason    | #NULL! |
| Augustine    | 2 | 30-Jan-16 | #NULL! | 9  | 2 | I got pregn  | #NULL! |
| Wisdom Ak    | 1 | 12-Feb-14 | #NULL! | 20 | 2 | Nothing      | #NULL! |
| Emmanuel     | 1 | 3-Nov-11  | #NULL! | 24 | 1 |              | 2      |
| Amina        | 2 | 27-Nov-15 | #NULL! | 11 | 2 | I had spont  | #NULL! |
| Rashmas Cl   | 1 | 3-Sep-13  | #NULL! | 24 | 2 |              | #NULL! |
| Peter        | 1 | 30-Oct-13 | #NULL! | 18 | 1 |              | 2      |

|              |   |           |        |    |   |                      |
|--------------|---|-----------|--------|----|---|----------------------|
| Saviour      | 1 | 30-Apr-16 | #NULL! | 18 | 2 | #NULL!               |
| Paulina Anz  | 2 | #####     | #NULL! | 24 | 1 | 1 menstrual c        |
| Rhoda Wer    | 2 | 30-Dec-15 | #NULL! | 13 | 2 | #NULL!               |
| Ephrainm     | 1 | 26-Feb-14 | #NULL! | 24 | 2 | Nothing #NULL!       |
| Rachael An   | 2 | 24-Jun-13 | #NULL! | 24 | 1 | 2                    |
| Rosemond     | 1 | 29-Dec-15 | #NULL! | 12 | 2 | I had spont #NULL!   |
| Daniel Ach   | 1 | 17-Dec-15 | #NULL! | 13 | 2 | My husban #NULL!     |
| Celicia Gwz  | 1 | 18-Oct-13 | #NULL! | 24 | 2 | Nothing #NULL!       |
| Denis        | 1 | 30-Dec-15 | #NULL! | 24 | 2 | I could not #NULL!   |
| Kingsstey    | 1 | 6-Aug-13  | #NULL! | 24 | 1 | 2                    |
| Abraham A    | 1 | 18-Oct-15 | #NULL! | 13 | 1 | 2                    |
| Slyvia Aliya | 2 | 9-Dec-11  | #NULL! | 24 | 1 | 2                    |
| Jennifer     | 2 | 5-Dec-15  | #NULL! | 10 | 1 | 2                    |
| Honey Nya    | 1 | 15-Jun-14 | #NULL! | 24 | 1 | 2                    |
|              | 2 | 12-Nov-15 | #NULL! | 11 | 1 | 2                    |
| Christain Ti | 1 | 22-Jan-10 | #NULL! | 24 | 1 | 2                    |
| Ajegewe A    | 1 | 25-Aug-10 | #NULL! | 16 | 1 | 2                    |
| Bernice Abi  | 2 | 18-Nov-15 | #NULL! | 14 | 2 | I did not se #NULL!  |
| Nicholas W   | 2 | 23-Dec-13 | #NULL! | 24 | 1 | 2                    |
| Clara Kaboi  | 2 | 10-Sep-13 | #NULL! | 24 | 1 | 2                    |
| Listowel To  | 1 | 15-Apr-16 | #NULL! | 7  | 1 | 2                    |
| Juliana Lat  | 2 | 24-Oct-08 | #NULL! | 24 | 1 | 2                    |
| Ane Anewe    | 2 | 27-Sep-14 | #NULL! | 18 | 1 | 1 Calender m         |
| Ezekiel Kwz  | 1 | 17-Oct-14 | #NULL! | 26 | 1 | 2                    |
|              | 2 | 1-Nov-15  | #NULL! | 14 | 2 | Nothing #NULL!       |
| Afogajong ,  | 1 | 9-Apr-15  | #NULL! | 18 | 1 | 2                    |
| Gladys Bab   | 2 | 4-Feb-16  | #NULL! | 27 | 1 | 2                    |
| Abena        | 2 | 10-Aug-12 | #NULL! | 27 | 1 | 2                    |
| Jaydem       | 1 | 16-Nov-14 | #NULL! | 12 | 2 | Husband no #NULL!    |
| Esther       | 2 | 30-Jan-14 | #NULL! | 24 | 2 | Nothing 1 Calender m |
|              | 1 | 11-Dec-15 | #NULL! | 14 | 2 | #NULL!               |
|              | 1 | 12-Nov-15 | #NULL! | 8  | 1 | 2                    |
| dariana      | 2 | 11-Nov-14 | #NULL! | 18 | 2 | nothing #NULL!       |
| emmanuel     | 2 | 15-Oct-12 | #NULL! | 24 | 1 | 2                    |
| cathrine kw  | 2 | 30-Jan-16 | #NULL! | 12 | 1 | 2                    |
| eugenia yiz  | 2 | 30-Apr-13 | #NULL! | 25 | 2 | #NULL!               |
| eliana       | 2 | 24-Feb-16 | #NULL! | 25 | 2 | #NULL!               |
| daniella     | 2 | 21-Nov-15 | #NULL! | 13 | 1 | 2                    |
| philip awur  | 1 | 11-Dec-15 | #NULL! | 18 | 2 | nothing #NULL!       |
| jacob naba   | 1 | 18-Aug-12 | #NULL! | 24 | 2 | #NULL!               |
| awedana t:   | 2 | 20-Aug-12 | #NULL! | 24 | 2 | nothing #NULL!       |
| philip siwe  | 1 | 30-Jan-16 | #NULL! | 9  | 1 | 2                    |
| michael ku   | 1 | 24-Feb-13 | #NULL! | 24 | 1 | 2                    |
| weriyirwc    | 2 | 11-Aug-12 | #NULL! | 16 | 1 | 2                    |
| babera       | 2 | 23-Apr-14 | #NULL! | 12 | 1 | 2                    |
| sivea        | 2 | 25-Nov-15 | #NULL! | 15 | 1 | 1                    |
| Silvian      | 2 | 12-Apr-16 | #NULL! | 12 | 1 | 2                    |

|              |   |           |        |    |   |             |                |
|--------------|---|-----------|--------|----|---|-------------|----------------|
| davina anv   | 2 | #####     | #NULL! | 24 | 1 |             | 2              |
| nathaniel    | 1 | 28-Mar-16 | #NULL! | 24 | 1 |             | 2              |
| deborah wa   | 2 | 18-Sep-14 | #NULL! | 24 | 2 | #NULL!      |                |
| david akun   | 1 | #####     | #NULL! | 18 | 1 |             | 2              |
| gladys kab   | 2 | 25-Nov-15 | #NULL! | 12 | 1 |             | 2              |
| bakiweyen    | 1 | 22-Apr-12 | #NULL! | 24 | 1 |             | 2              |
| felix kaba   | 1 | 10-Oct-14 | #NULL! | 24 | 2 | i do not wa | #NULL!         |
| mumuni ka    | 1 | 11-Nov-15 | #NULL! | 10 | 2 | i do not wa | #NULL!         |
| brian achar  | 1 | 28-Aug-13 | #NULL! | 24 | 1 |             | 2              |
| adamoah n    | 2 | 17-Dec-15 | #NULL! | 24 | 1 |             | 2              |
| kudamo jar   | 2 | 10-Oct-15 | #NULL! | 12 | 2 | i do not wa | #NULL!         |
| webasiah b   | 1 | 8-Jul-13  | #NULL! | 24 | 1 |             | 2              |
| florence wa  | 2 | 9-Jan-16  | #NULL! | 15 | 2 |             | #NULL!         |
| issabella p  | 2 | 11-Mar-16 | #NULL! | 9  | 1 |             | 2              |
| wenawote     | 1 | 3-Feb-16  | #NULL! | 24 | 1 |             | 2              |
| kennedy sc   | 1 | 22-Jul-10 | #NULL! | 27 | 2 |             | #NULL!         |
| jubene we    | 2 | 24-Sep-11 | #NULL! | 26 | 1 |             | 2              |
| erica asoliv | 2 | 18-Apr-16 | #NULL! | 9  | 1 |             | 2              |
| cliford abu  | 1 | 13-Feb-11 | #NULL! | 24 | 2 |             | #NULL!         |
| clinton aba  | 1 | 15-Jul-13 | #NULL! | 24 | 2 |             | #NULL!         |
| sylvia balar | 2 | 14-Dec-15 | #NULL! | 11 | 1 |             | 2              |
| Beringa Kar  | 2 | 10-Oct-10 | #NULL! | 18 | 1 |             | 2              |
| Emma We      | 1 | 7-Oct-14  | #NULL! | 24 | 1 |             | 2              |
| Wisdom Ja    | 1 | 17-Dec-15 | #NULL! | 24 | 1 |             | 2              |
| Issah Issft  | 1 | 24-Feb-16 | #NULL! | 12 | 1 |             | 2              |
| Shafoua La   | 2 | 14-Jun-13 | #NULL! | 24 | 1 |             | 1 I uses the c |
| Vicentia Ac  | 2 | 15-Nov-13 | #NULL! | 22 | 1 |             | 2              |
| Baba Salifu  | 1 | 10-Feb-16 | #NULL! | 8  | 1 |             | 2              |
| Modesta      | 2 | 6-May-13  | #NULL! | 19 | 1 | Husband tr  | #NULL!         |
| Blessing An  | 1 | 1-May-16  | #NULL! | 7  | 1 |             | 2              |
|              | 1 | 10-Oct-15 | #NULL! | 8  | 1 |             | #NULL!         |
|              | 2 | 26-Feb-16 | #NULL! | 9  | 2 |             | #NULL!         |
| Awelana      | 2 | 9-Apr-14  | #NULL! | 24 | 1 |             | 2              |
| David        | 1 | 28-Apr-13 |        | 17 | 1 |             | 2              |
| Fatima Osn   | 2 | 21-Feb-13 | #NULL! | 24 | 2 |             | #NULL!         |
| Orsborn      | 1 | 14-Oct-15 | #NULL! | 12 | 1 |             | 2              |
|              | 2 | 19-Mar-16 | #NULL! | 11 | 2 |             | #NULL!         |
| Isahk Suraj  | 1 | 25-Nov-15 | #NULL! | 12 | 2 | Husband re  | #NULL!         |
| Belvelnad    | 1 | 3-Dec-15  | #NULL! | 9  | 1 |             | 2              |
|              | 2 | 25-Feb-16 | #NULL! | 10 | 2 |             | #NULL!         |
| Abdulirn     | 1 | 16-Nov-11 | #NULL! | 28 | 1 |             | 2              |
| Shadrack     | 1 | 2-Nov-12  | #NULL! | 8  | 1 |             | 2              |
| Douglas      | 1 | 23-Mar-09 | #NULL! | 21 | 1 |             | 1 Calender m   |
| Stanley      | 1 | 28-Apr-12 | #NULL! | 24 | 1 |             | 2              |
| Stephanie    | 2 | 18-Dec-15 | #NULL! | 10 | 2 | No money    | #NULL!         |
| Amadu        | 1 | 23-Dec-15 | #NULL! | 14 | 2 | Wants pre   | #NULL!         |
|              | 2 | 18-Feb-16 | #NULL! | 11 | 1 |             | #NULL!         |

|               |   |           |        |    |   |                     |
|---------------|---|-----------|--------|----|---|---------------------|
| Newton        | 1 | 3-Nov-12  | #NULL! | 24 | 1 | 2                   |
| Blessing      | 2 | 7-Nov-14  | #NULL! | 18 | 1 | 2                   |
|               | 1 | 17-Dec-15 | #NULL! | 14 | 1 | 2                   |
| Fauziya       | 2 | 3-Oct-11  | #NULL! | 18 | 1 | 2                   |
|               | 2 | 30-Nov-15 | #NULL! | 13 | 2 | #NULL!              |
| Noreen        | 2 | 30-Sep-09 | #NULL! | 2  | 1 | 2                   |
| Ezaethel Bæ   | 1 | 10-Feb-16 | #NULL! | 11 | 2 | Has no rea: #NULL!  |
| Weja Apuri    | 1 | 16-Oct-13 | #NULL! | 27 | 1 | 2                   |
| julius apani  | 1 | 24-Mar-16 | #NULL! | 36 | 1 | 2                   |
| babalewe a    | 1 | 11-Oct-13 | #NULL! | 24 | 1 | 2                   |
| safia         | 2 | 6-Mar-16  | #NULL! | 8  | 1 | 2                   |
| christina w   | 2 | 25-Nov-13 | #NULL! | 30 | 1 | 2                   |
| songojori     | 1 | 9-Dec-15  | #NULL! | 16 | 1 | 2 0                 |
| agebuno ol    | 2 | 28-Dec-14 | #NULL! | 20 | 2 | #NULL!              |
| justice ado   | 1 | 30-Nov-15 | #NULL! | 13 | 2 | #NULL!              |
| christabel a  | 2 | 20-Oct-14 | #NULL! | 30 | 2 | #NULL!              |
| elisa akulgæ  | 2 | 30-Nov-15 | #NULL! | 12 | 1 | 2                   |
| danwonno      | 1 | 19-Dec-15 | #NULL! | 14 | 2 | #NULL!              |
| christabel    | 2 | 6-Dec-15  | #NULL! | 9  | 2 | #NULL!              |
| alhassan fa   | 1 | 9-Dec-14  | #NULL! | 18 | 2 | #NULL!              |
| johnson       | 1 | 30-Dec-15 | #NULL! | 12 | 2 | #NULL!              |
| leonard ala   | 1 | 21-Nov-13 | #NULL! | 22 | 1 | 2                   |
| titus alaar   | 1 | 30-Jan-16 | #NULL! | 12 | 1 | 2                   |
| martina ab    | 2 | 27-Dec-16 | #NULL! | 24 | 2 | #NULL!              |
| theresa atu   | 2 | 5-Jun-13  | #NULL! | 25 | 1 | 2                   |
| lilian atodic | 2 | 5-Dec-15  | #NULL! | 16 | 1 | 2                   |
| daniel nyaæ   | 1 | 30-Mar-16 | #NULL! | 10 | 2 | #NULL!              |
| pius tijaani  | 1 | 9-Nov-15  | #NULL! | 12 | 2 | #NULL!              |
| zilam adon    | 2 | 4-Jul-13  | #NULL! | 18 | 1 | 2                   |
| aiden akur    | 1 | 14-Jul-12 | #NULL! | 24 | 1 | 2                   |
| moses adon    | 1 | 30-Dec-16 | #NULL! | 36 | 1 | 2                   |
| nancy azur    | 2 | 8-Dec-15  | #NULL! | 11 | 1 | 2                   |
| samu adarr    | 1 | 20-Dec-13 | #NULL! | 18 | 1 | 2                   |
| elizabeth     | 2 | 10-Oct-13 | #NULL! | 24 | 1 | 2                   |
| cynthia nbi   | 2 | 11-Jan-16 | #NULL! | 12 | 1 | 2                   |
| wisdom an     | 1 | 20-Dec-15 | #NULL! | 12 | 2 | i don't wan #NULL!  |
| ayorebono     | 1 | 10-Nov-12 | #NULL! | 24 | 2 | i haven't de #NULL! |
|               | 1 | 14-Apr-16 | #NULL! | 9  | 1 | 2                   |
| aziseri agar  | 1 | 26-Jun-11 | #NULL! | 24 | 1 | 2                   |
| mathias aw    | 1 | 23-Dec-15 | #NULL! | 12 | 2 | #NULL!              |
|               | 2 | 9-Mar-10  | #NULL! | 18 | 1 | 2                   |
| abelewine     | 1 | 19-Apr-16 | #NULL! | 20 | 1 | 2 0                 |
|               | 2 | 12-Dec-15 | #NULL! | 11 | 2 | #NULL!              |
| adesira abe   | 1 | 3-Jun-12  | #NULL! | 24 | 1 | 2                   |
| clinton ben   | 1 | 1-Jan-13  | #NULL! | 24 | 1 | 1 abstinence        |
| anabuno ar    | 1 | 21-Feb-16 | #NULL! | 12 | 1 | 2                   |
| philipa azik  | 2 | 1-Apr-13  | #NULL! | 28 | 1 | 2                   |

|              |   |           |        |    |   |              |              |
|--------------|---|-----------|--------|----|---|--------------|--------------|
| felicia ayab | 2 | 16-Mar-16 | #NULL! | 27 | 1 |              | 2            |
| justina agai | 2 | 4-May-14  | #NULL! | 24 | 2 | #NULL!       |              |
| akelignera   | 2 | 6-Feb-16  | #NULL! | 10 | 1 |              | 2            |
| clemencia    | 2 | 3-Jul-14  | #NULL! | 24 | 1 |              | 1 abstainanc |
| calvin ason  | 1 | 28-Jul-13 | #NULL! | 31 | 1 |              | 1 abstainces |
| awinmata     | 2 | 2-Dec-15  | #NULL! | 7  | 2 | was not livi | #NULL!       |
| philip kofi  | 1 | 12-Apr-16 | #NULL! | 11 | 2 |              | #NULL!       |
| faiza alhass | 2 | 17-Oct-10 | #NULL! | 36 | 1 |              | 2            |
| josiah akuv  | 1 | 11-Nov-15 | #NULL! | 13 | 2 |              | #NULL!       |
| nchor lucy   | 2 | 30-Jul-14 | #NULL! | 14 | 1 |              | 2            |
| jennifer arr | 2 | 10-Apr-14 | #NULL! | 24 | 2 |              | #NULL!       |
| shalot akuli | 2 | 14-Oct-14 | #NULL! | 24 | 2 |              | #NULL!       |
| joyce asanc  | 2 | 18-Feb-16 | #NULL! | 12 | 2 |              | #NULL!       |
| helen asaki  | 2 | 5-Jan-15  | #NULL! | 14 | 1 |              | 2            |
| shedrack a   | 1 | 20-Jul-14 | #NULL! | 24 | 1 |              | 2            |
| asakiya      | 1 | 2-Sep-13  | #NULL! | 20 | 1 |              | 2            |
| avoliya awi  | 2 | 4-May-12  | #NULL! | 30 | 1 |              | 2            |
| atiborum o   | 2 | 16-Feb-16 | #NULL! | 10 | 1 |              | 2            |
| adagwine a   | 2 | 6-Dec-15  | #NULL! | 24 | 1 |              | 2            |
| gladys awir  | 2 | 20-Oct-11 | #NULL! | 29 | 2 |              | #NULL!       |
| rahel anafo  | 2 | 22-Nov-15 | #NULL! | 12 | 1 |              | 2            |
| gideon asu:  | 1 | 19-Jun-12 | #NULL! | 24 | 2 |              | #NULL!       |
| adugbire ni  | 2 | 2-Nov-13  | #NULL! | 36 | 1 |              | 2            |
| gabriel asu  | 1 | 11-Nov-15 | #NULL! | 11 | 2 |              | #NULL!       |
| joseph bab   | 1 | 11-Dec-14 | #NULL! | 25 | 1 |              | 2            |
| atibila anyi | 1 | 14-Feb-16 | #NULL! | 24 | 1 |              | 2            |
| akagji kami  | 1 | 3-Dec-15  | #NULL! | 10 | 1 |              | 2            |
| daniel akug  | 1 | 28-Aug-12 | #NULL! | 24 | 1 |              | 2            |
|              | 2 | 11-Aug-10 | #NULL! | 24 | 1 |              | 2            |
| christabel   | 2 | 22-Jan-16 | #NULL! | 12 | 2 | nothing      | #NULL!       |
| ponganga     | 2 | 10-Nov-15 | #NULL! | 9  | 2 | nothing      | #NULL!       |
| anabil       | 2 | 3-Jun-11  | #NULL! | 18 | 1 |              | 2            |
| cynthia apc  | 2 | 1-Sep-10  | #NULL! | 24 | 1 |              | 2            |
| akanbuke     | 2 | 10-Nov-15 | #NULL! | 15 | 1 |              | 2            |
| atowine ba   | 1 | 10-Nov-10 | #NULL! | 24 | 1 |              | 2            |
| macillina a  | 2 | #####     | #NULL! | 20 | 1 |              | 2            |
| deliwuni av  | 1 | 5-Nov-15  | #NULL! | 25 | 2 | not living w | #NULL!       |
| augustine    | 1 | 22-Apr-12 | #NULL! | 24 | 1 |              | 2            |
| gideon ayir  | 1 | 19-Dec-15 | #NULL! | 11 | 1 |              | 2            |
| ajusiba apa  | 2 | 11-Mar-14 | #NULL! | 27 | 1 |              | 1 abstaince  |
| ibrahim ma   | 1 | 21-Jan-16 | #NULL! | 24 | 2 | nothing      | #NULL!       |
| felix atinga | 1 | 3-Apr-16  | #NULL! | 8  | 1 | 0            | 2 0          |
| ajesiba nya  | 1 | 26-Mar-10 | #NULL! | 24 | 1 |              | 2            |
| ayidana bal  | 1 | 30-Nov-16 | #NULL! | 24 | 1 |              | 2            |
| adoliwine    | 1 | 30-Sep-11 | #NULL! | 24 | 1 |              | 2            |
| Modesta      | 2 | 22-Mar-16 | #NULL! | 10 | 2 |              | #NULL!       |
| richmond r   | 1 | 15-Nov-09 | #NULL! | 30 | 2 |              | #NULL!       |

|              |   |           |        |    |               |        |
|--------------|---|-----------|--------|----|---------------|--------|
| awinsugiya   | 1 | 10-Dec-10 | #NULL! | 26 | 1             | 2      |
| awine abigi  | 2 | 18-Dec-15 | #NULL! | 12 | 1             | 2      |
| mama aben:   | 2 | 3-Feb-16  | #NULL! | 11 | 2             | #NULL! |
|              | 2 | 10-Jan-14 | #NULL! | 15 | 1             | 2      |
| elisha aber  | 1 | 25-Jul-09 | #NULL! | 36 | 1             | 2      |
| awinboya a   | 1 | 7-Dec-16  | #NULL! | 36 | 1             | 2      |
| akafabili ak | 2 | 24-Feb-10 | #NULL! | 25 | 1             | 2      |
| akanbeliba   | 2 | 31-Dec-15 | #NULL! | 14 | 1             | 2      |
| anyidina ak  | 1 | 6-Sep-11  | #NULL! | 24 | 1             | 2      |
| anyidina ak  | 1 | 6-Sep-11  | #NULL! | 12 | 1             | 2      |
| amosuno a    | 2 | 18-Nov-11 | #NULL! | 48 | 2             | #NULL! |
| awinimong    | 2 | 9-Nov-16  | #NULL! | 28 | 1             | 2      |
| modesta al   | 2 | 26-Feb-16 | #NULL! | 13 | 2             | #NULL! |
| onespjilous  | 1 | 23-Apr-11 | #NULL! | 24 | 1             | 2      |
| ataree devi  | 1 | 1-Oct-15  | #NULL! | 13 | 1             | 2      |
| akafari ama  | 1 | 26-Sep-12 | #NULL! | 24 | 2 fears the n | #NULL! |
| atasire      | 1 | 4-Mar-16  | #NULL! | 11 | 1             | 2      |
| agabisa kw   | 1 | 3-Sep-14  | #NULL! | 27 | 1             | 2      |
| Atoyire Agc  | 1 | 18-Jan-13 | #NULL! | 24 | 2 i do not wa | #NULL! |
| Awinebisa .  | 1 | 10-Mar-16 | #NULL! | 12 | 2 Nothing     | #NULL! |
| Achelwine    | 2 | 12-Dec-15 | #NULL! | 13 | 1             | 2      |
| Adijiboba A  | 2 | 17-Mar-11 | #NULL! | 24 | 2 I do not wa | #NULL! |
| Akinbe Abc   | 1 | 23-Jun-10 | #NULL! | 20 | 1             | 2      |
| Atamiya Av   | 2 | 12-Feb-16 | #NULL! | 18 | 1             | 2      |
| Aporeyala l  | 1 | 9-Aug-12  | #NULL! | 24 | 2 I do not wa | #NULL! |
| Williams Je  | 1 | 15-Jan-16 | #NULL! | 10 | 2 I do not ha | #NULL! |
| Gloria Nchc  | 2 | 19-Apr-14 | #NULL! | 24 | 2             | #NULL! |
| Prince Ago:  | 1 | 27-Mar-16 | #NULL! | 11 | 1             | 2      |
| Jane Atiro   | 2 | 19-Nov-15 | #NULL! | 16 | 1             | 2      |
| Nancy Wez    | 2 | 2-Apr-13  | #NULL! | 22 | 2             | 2      |
| Alban Wed    | 1 | 2-Mar-14  | #NULL! | 23 | 1             | 2      |
| Nathasia     | 2 | 11-Jan-15 | #NULL! | 13 | 1             | 2      |
| logodabam    | 1 | 16-Oct-12 | #NULL! | 18 | 1             | 2      |
| malvin aba   | 1 | 15-Mar-16 | #NULL! | 18 | 1             | 2      |
| shadrack     | 1 | 8-Nov-15  | #NULL! | 14 | 2             | #NULL! |
| elijahil     | 1 | 12-Dec-13 | #NULL! | 24 | 2             | #NULL! |
| madiba asiq  | 1 | 17-Apr-14 | #NULL! | 18 | 2             | #NULL! |
| issah sulerr | 1 | 1-Dec-16  | #NULL! | 12 | 1             | 2      |
| dorcas       | 2 | 20-Dec-11 | #NULL! | 24 | 1 2           | 2      |
| Atiah roger  | 1 | 10-Feb-16 | #NULL! | 7  | 1             | 2      |
| emmanuel     | 2 | 27-Sep-13 | #NULL! | 16 | 2             | #NULL! |
| micheal      | 1 | 22-Nov-15 | #NULL! | 19 | 1             | 2      |
| nashed har   | 2 | 12-Jan-13 | #NULL! | 10 | 1             | 2      |
| Sadick       | 1 | 15-Feb-16 | #NULL! | 10 | 1             | #NULL! |
| moses abal   | 1 | 10-Dec-15 | #NULL! | 13 | 1             | 2      |
| masilatu     | 2 | 24-Jan-16 | #NULL! | 11 | 1 2           | 2      |
| amelana nu   | 2 | 3-Sep-12  | #NULL! | 24 | 1             | 2      |

|             |   |           |        |    |   |              |
|-------------|---|-----------|--------|----|---|--------------|
| hannah kur  | 2 | 14-Jan-16 | #NULL! | 13 | 2 | #NULL!       |
| valiham     | 2 | 23-Nov-14 | #NULL! | 12 | 1 | 2            |
| jason chris | 1 | 30-Jan-16 | #NULL! | 11 | 1 | 1 study mens |
| elikem      | 1 | 8-Jun-13  | #NULL! | 21 | 1 | 2            |
| Justice     | 1 | 9-Nov-15  | #NULL! | 14 | 1 | 2            |
| bervelim    | 1 | 4-Jul-13  | #NULL! | 24 | 1 | 2            |
| blessing    | 2 | 12-Apr-16 | #NULL! | 12 | 1 | 2            |
| blessing    | 2 | 12-Apr-13 | #NULL! | 24 | 1 | 2            |
| ocash       | 1 | 10-Jan-16 | #NULL! | 9  | 1 | 2            |
| leonard     | 1 | 2-Aug-12  | #NULL! | 18 | 1 | 2            |
| madunna     | 2 | 12-Aug-12 | #NULL! | 24 | 1 | 2            |
| lordina     | 2 | 27-Dec-15 | #NULL! | 13 | 1 | 2            |
| Alex        | 1 | 13-Nov-15 | #NULL! | 11 | 1 | 2            |
| Anuboom     | 2 | 30-Aug-13 | #NULL! | 27 | 1 | 2            |



| E5bDepoPr | E5cImplanc | E5eMicrog | E4aNorigyr | E5dJadelle! | E6Whydidy     | E7Wheredi | E7aothersc | F1Wasyour |
|-----------|------------|-----------|------------|-------------|---------------|-----------|------------|-----------|
| 1         | #NULL!     | #NULL!    | #NULL!     | #NULL!      | it can be st  | 1         |            | 1         |
| 1         | #NULL!     | #NULL!    | #NULL!     | #NULL!      | suitable for  | 1         |            | 2         |
| 1         | #NULL!     | #NULL!    | #NULL!     | #NULL!      | it is good a  | 1         |            | 1         |
| #NULL!    | #NULL!     | #NULL!    | #NULL!     | #NULL!      |               | #NULL!    |            | #NULL!    |
| 1         | #NULL!     | #NULL!    | #NULL!     | #NULL!      | because yo    | 1         |            | 2         |
| #NULL!    |            | 1         | #NULL!     | #NULL!      | that was th   | 1         |            | 1         |
| #NULL!    | #NULL!     | #NULL!    | #NULL!     | #NULL!      |               | #NULL!    |            | #NULL!    |
| #NULL!    | #NULL!     | #NULL!    | #NULL!     | #NULL!      |               | #NULL!    |            | #NULL!    |
| 1         | #NULL!     | #NULL!    | #NULL!     | #NULL!      | i chose bas   | 1         |            | 1         |
| 1         | #NULL!     | #NULL!    | #NULL!     | #NULL!      | one can stc   | 1         |            | 1         |
| #NULL!    |            | 1         | #NULL!     | #NULL!      | i wanted to   | 1         |            | 1         |
| #NULL!    | #NULL!     | #NULL!    | #NULL!     | #NULL!      |               | #NULL!    |            | #NULL!    |
| #NULL!    | #NULL!     | #NULL!    | #NULL!     | #NULL!      |               | #NULL!    |            | #NULL!    |
| #NULL!    | #NULL!     | #NULL!    | #NULL!     | #NULL!      |               | #NULL!    |            | #NULL!    |
| 1         | #NULL!     | #NULL!    | #NULL!     | #NULL!      |               | 1         |            | 1         |
| #NULL!    |            | 1         | #NULL!     | #NULL!      |               | 1 1       |            | 1         |
| #NULL!    | #NULL!     | #NULL!    | #NULL!     | #NULL!      |               | #NULL!    |            | #NULL!    |
| 1         | #NULL!     | #NULL!    | #NULL!     | #NULL!      | good for m    | 1         |            | 1         |
| #NULL!    | #NULL!     | #NULL!    | #NULL!     | #NULL!      |               | #NULL!    |            | #NULL!    |
| #NULL!    |            | 1         | #NULL!     | #NULL!      | because it :  | 1         |            | 1         |
| 1         | #NULL!     | #NULL!    | #NULL!     |             | 1 they are go | 1         |            | 1         |
| 1         | #NULL!     | #NULL!    | #NULL!     | #NULL!      | because it's  | 1         |            | 1         |
| #NULL!    | #NULL!     | #NULL!    | #NULL!     | #NULL!      |               | #NULL!    |            | #NULL!    |
| #NULL!    | #NULL!     |           | 1          | #NULL!      |               | 1         |            | 1         |
| 1         | #NULL!     | #NULL!    | #NULL!     | #NULL!      | i was comf    | 1         |            | 2         |
| #NULL!    | #NULL!     | #NULL!    | #NULL!     | #NULL!      |               | #NULL!    |            | #NULL!    |
| #NULL!    | #NULL!     | #NULL!    | #NULL!     | #NULL!      |               | #NULL!    |            | #NULL!    |
| 1         | #NULL!     | #NULL!    | #NULL!     | #NULL!      | it is good fc | 1         |            | 1         |
| 1         | #NULL!     | #NULL!    | #NULL!     | #NULL!      | that suits n  | 1         |            | 1         |
| 1         | #NULL!     | #NULL!    | #NULL!     | #NULL!      | it was gooc   | 1         |            | 1         |
| #NULL!    | #NULL!     | #NULL!    | #NULL!     | #NULL!      |               | #NULL!    |            | #NULL!    |
| 1         | #NULL!     | #NULL!    | #NULL!     | #NULL!      |               | 1         |            | 1         |
| 1         | #NULL!     | #NULL!    | #NULL!     | #NULL!      | that is wha   | 1         |            | 1         |
| #NULL!    | #NULL!     | #NULL!    | #NULL!     | #NULL!      |               | #NULL!    |            | #NULL!    |
| #NULL!    | #NULL!     | #NULL!    | #NULL!     | #NULL!      |               | #NULL!    |            | #NULL!    |
| 1         | #NULL!     | #NULL!    | #NULL!     | #NULL!      |               | #NULL!    |            | 1         |
| 1         | #NULL!     | #NULL!    | #NULL!     | #NULL!      | trial         | 1         |            | 1         |
| 1         | #NULL!     | #NULL!    | #NULL!     | #NULL!      | good for m    | 1         |            | 1         |
| #NULL!    | #NULL!     | #NULL!    | #NULL!     | #NULL!      |               | #NULL!    |            | #NULL!    |
| 1         | #NULL!     | #NULL!    | #NULL!     | #NULL!      | it is good fc | 1         |            | 1         |
| 1         |            | 1         | #NULL!     | #NULL!      | tried depo    | 1         |            | 1         |
| 1         | #NULL!     | #NULL!    | #NULL!     | #NULL!      | trial, but h  | 1         |            | 2         |
| 1         | #NULL!     | #NULL!    | #NULL!     | #NULL!      | chose to tr   | 1         |            | 2         |
| #NULL!    | #NULL!     | #NULL!    | #NULL!     |             | 1             | 1         |            | 1         |
| 1         |            | 1         | #NULL!     | #NULL!      | beacause o    | 1         |            | 1         |
| #NULL!    | #NULL!     | #NULL!    | #NULL!     | #NULL!      |               | #NULL!    |            | #NULL!    |

|        |        |        |        |        |                |        |        |
|--------|--------|--------|--------|--------|----------------|--------|--------|
| 1      | #NULL! | #NULL! | #NULL! | #NULL! | Because of     | 1      | 1      |
| #NULL! | 1      | #NULL! | #NULL! | #NULL! |                | 1      | 1      |
| #NULL! | #NULL! | #NULL! | #NULL! | #NULL! |                | #NULL! | #NULL! |
| #NULL! | #NULL! | #NULL! | #NULL! | #NULL! |                | #NULL! | #NULL! |
| #NULL! | #NULL! | #NULL! | #NULL! | #NULL! |                | #NULL! | #NULL! |
| 0      | 0      | 0      | 0      | 1      | ito prevent    | 1 2    | 2      |
| #NULL! | #NULL! | #NULL! | #NULL! | #NULL! |                | #NULL! | #NULL! |
| #NULL! | #NULL! | #NULL! | #NULL! | #NULL! |                | #NULL! | #NULL! |
| 1      | 0      | 0      | 0      | 0      | resting for :  | 1 1    | 1      |
| #NULL! | #NULL! | #NULL! | #NULL! | #NULL! |                | #NULL! | #NULL! |
| #NULL! | #NULL! | #NULL! | #NULL! | #NULL! |                | #NULL! | #NULL! |
| #NULL! | #NULL! | #NULL! | #NULL! | #NULL! |                | #NULL! | #NULL! |
| 1      | 0      | 0      | 0      | 0      |                | 1      | 1      |
| 1      | 0      | 0      | 0      | 0      |                | 1      | 1      |
| #NULL! | #NULL! | #NULL! | #NULL! | #NULL! |                | #NULL! | #NULL! |
| 1      | 0      | 0      | 0      | 0      |                | 1      | 1      |
| #NULL! | #NULL! | #NULL! | #NULL! | #NULL! |                | #NULL! | #NULL! |
| #NULL! | #NULL! | #NULL! | #NULL! | #NULL! |                | #NULL! | #NULL! |
| #NULL! | #NULL! | #NULL! | #NULL! | #NULL! |                | #NULL! | #NULL! |
| #NULL! | #NULL! | #NULL! | #NULL! | #NULL! |                | #NULL! | #NULL! |
| #NULL! | #NULL! | #NULL! | #NULL! | #NULL! | safe and ch    | #NULL! | #NULL! |
| #NULL! | #NULL! | #NULL! | #NULL! | #NULL! |                | #NULL! | #NULL! |
| #NULL! | #NULL! | #NULL! | #NULL! | #NULL! |                | #NULL! | #NULL! |
| #NULL! | #NULL! | #NULL! | #NULL! | #NULL! |                | #NULL! | #NULL! |
| #NULL! | #NULL! | #NULL! | #NULL! | #NULL! |                | 1 3    | #NULL! |
| #NULL! | #NULL! | #NULL! | #NULL! | #NULL! |                | #NULL! | #NULL! |
| #NULL! | #NULL! | #NULL! | #NULL! | #NULL! |                | #NULL! | #NULL! |
| #NULL! | #NULL! | #NULL! | #NULL! | #NULL! |                | #NULL! | #NULL! |
| 0      | 1      | 0      | 0      | 0      | just space r   | 1      | 1      |
| #NULL! | #NULL! | #NULL! | #NULL! | #NULL! |                | #NULL! | #NULL! |
| 1      | 0      | 0      | 0      | 0      | it is goog fc  | 1      | 1      |
| 1      | 0      | 0      | 0      | 0      | just want it   | 1      | 1      |
| 0      | 0      | 0      | 0      | 0      | 1 I needed sc  | 1      | 2      |
| 1      | 0      | 0      | 0      | 0      |                | 1      | 1      |
| #NULL! | #NULL! | #NULL! | #NULL! | #NULL! |                | #NULL! | #NULL! |
| 1      | 0      | 0      | 0      | 0      | fofr a trick   | 1      | 1      |
| #NULL! | #NULL! | #NULL! | #NULL! | #NULL! |                | #NULL! | #NULL! |
| #NULL! | #NULL! | #NULL! | #NULL! | #NULL! |                | #NULL! | #NULL! |
| 0      | 0      | 0      | 0      | 0      | 1 i like tyhat | 1      | #NULL! |
| 1      | 0      | 0      | 0      | 0      | .i like it     | 1      | 1      |
| 1      | 0      | 0      | 0      | 0      |                | 1      | 1      |
| #NULL! | #NULL! | #NULL! | #NULL! | #NULL! |                | #NULL! | #NULL! |
| #NULL! | #NULL! | #NULL! | #NULL! | #NULL! |                | #NULL! | #NULL! |
| 1      | 0      | 0      | 0      | 0      |                | 1      | 1      |
| #NULL! | #NULL! | #NULL! | #NULL! | #NULL! |                | #NULL! | #NULL! |

|        |        |        |        |        |               |        |
|--------|--------|--------|--------|--------|---------------|--------|
| #NULL! | #NULL! | #NULL! | #NULL! | #NULL! | #NULL!        | #NULL! |
| #NULL! | #NULL! | #NULL! | #NULL! | #NULL! | #NULL!        | #NULL! |
| 1      | 0      | 0      | 0      | 0      | it is good fc | 1      |
| #NULL! | #NULL! | #NULL! | #NULL! | #NULL! | #NULL!        | #NULL! |
| #NULL! | #NULL! | #NULL! | #NULL! | #NULL! | #NULL!        | #NULL! |
| #NULL! | #NULL! | #NULL! | #NULL! | #NULL! | #NULL!        | #NULL! |
| #NULL! | #NULL! | #NULL! | #NULL! | #NULL! | #NULL!        | #NULL! |
| #NULL! | #NULL! | #NULL! | #NULL! | #NULL! | #NULL!        | #NULL! |
| 0      | 0      | 0      | 1      | 0      | nothing       | 1      |
| 1      | 0      | 0      | 0      | 0      | nothing       | 3      |
| 1      | 0      | 0      | 0      | 0      | nothing       | 1      |
| #NULL! | #NULL! | #NULL! | #NULL! | #NULL! | #NULL!        | #NULL! |
| #NULL! | #NULL! | #NULL! | #NULL! | #NULL! | #NULL!        | #NULL! |
| #NULL! | #NULL! | #NULL! | #NULL! | #NULL! | #NULL!        | #NULL! |
| 1      | 0      | 0      | 0      | 0      | it is conven  | 1      |
| 1      | 0      | 0      | 0      | 0      | it is good fc | 1      |
| #NULL! | #NULL! | #NULL! | #NULL! | #NULL! | #NULL!        | #NULL! |
| #NULL! | #NULL! | #NULL! | #NULL! | #NULL! | #NULL!        | #NULL! |
| #NULL! | #NULL! | #NULL! | #NULL! | #NULL! | #NULL!        | #NULL! |
| #NULL! | #NULL! | #NULL! | #NULL! | #NULL! | #NULL!        | #NULL! |
| #NULL! | #NULL! | #NULL! | #NULL! | #NULL! | #NULL!        | #NULL! |
| #NULL! | #NULL! | #NULL! | #NULL! | #NULL! | #NULL!        | #NULL! |
| #NULL! | #NULL! | #NULL! | #NULL! | #NULL! | #NULL!        | #NULL! |
| 1      | 0      | 0      | 0      | 0      |               | 1      |
| #NULL! | #NULL! | #NULL! | #NULL! | #NULL! | #NULL!        | #NULL! |
| #NULL! | #NULL! | #NULL! | #NULL! | #NULL! | #NULL!        | #NULL! |
| 0      | 0      | 1      | 0      | 0      | no side effe  | 1      |
| 0      | 0      | 1      | 0      | 0      | minimal sic   | 1      |
| 1      | 0      | 0      | 0      | 0      | nothing       | 1      |
| 1      | 0      | 0      | 0      | 0      | nothing       | 1      |
| 1      | 0      | 0      | 0      | 0      | nothing       | 1      |
| #NULL! | #NULL! | #NULL! | #NULL! | #NULL! | #NULL!        | #NULL! |
| 1      | 0      | 0      | 0      | 0      |               | 1      |
| #NULL! | #NULL! | #NULL! | #NULL! | #NULL! | #NULL!        | #NULL! |
| #NULL! | #NULL! | #NULL! | #NULL! | #NULL! | #NULL!        | #NULL! |
| 1      | 0      | 0      | 0      | 0      | tried to see  | 1      |
| #NULL! | #NULL! | #NULL! | #NULL! | #NULL! | #NULL!        | #NULL! |
| 1      | 0      | 0      | 0      | 0      |               | 1      |
| 1      | 0      | 0      | 0      | 0      | nothing       | 1      |
| 1      | 0      | 0      | 0      | 0      |               | 1      |
| 0      | 0      | 1      | 0      | 0      |               | 3      |
| 0      | 0      | 0      | 1      | 0      |               | 1      |
| 1      | 0      | 0      | 0      | 0      |               | 1      |
| #NULL! | #NULL! | #NULL! | #NULL! | #NULL! | #NULL!        | #NULL! |
| 0      | 0      | 0      | 1      | 0      |               | 1      |
|        |        |        |        |        |               | 2      |





|        |        |        |        |        |               |        |        |
|--------|--------|--------|--------|--------|---------------|--------|--------|
| #NULL! | #NULL! | #NULL! | #NULL! | #NULL! |               | #NULL! | #NULL! |
| #NULL! | #NULL! | #NULL! | #NULL! | #NULL! |               | #NULL! | #NULL! |
| #NULL! | #NULL! | #NULL! | #NULL! | #NULL! |               | #NULL! | #NULL! |
| #NULL! | #NULL! | #NULL! | #NULL! | #NULL! |               | #NULL! | #NULL! |
| #NULL! | #NULL! | 1      | #NULL! | #NULL! | Because of    | 1      | 1      |
| #NULL! | 1      | #NULL! | #NULL! | #NULL! | My body is    | 1      | 1      |
| #NULL! | #NULL! | #NULL! | #NULL! | #NULL! |               | #NULL! | #NULL! |
| #NULL! | #NULL! | #NULL! | #NULL! | #NULL! |               | #NULL! | #NULL! |
| #NULL! | #NULL! | #NULL! | #NULL! | #NULL! |               | #NULL! | #NULL! |
| #NULL! | #NULL! | #NULL! | #NULL! | #NULL! |               | #NULL! | #NULL! |
| 1      | #NULL! | #NULL! | #NULL! | #NULL! |               | 1      | 1      |
| #NULL! | #NULL! | #NULL! | #NULL! | #NULL! |               | #NULL! | #NULL! |
| 1      | #NULL! | #NULL! | #NULL! | #NULL! | Prefers tha   | 1      | 1      |
| #NULL! | #NULL! | #NULL! | #NULL! | #NULL! |               | #NULL! | #NULL! |
| #NULL! | #NULL! | #NULL! | 1      | #NULL! | To avoid cc   | 1      | 1      |
| #NULL! | #NULL! | #NULL! | #NULL! | #NULL! |               | #NULL! | #NULL! |
| #NULL! | #NULL! | #NULL! | #NULL! | #NULL! |               | #NULL! | #NULL! |
| #NULL! | #NULL! | #NULL! | #NULL! | #NULL! |               | #NULL! | #NULL! |
| #NULL! | #NULL! | #NULL! | #NULL! | #NULL! |               | #NULL! | #NULL! |
| 1      | #NULL! | #NULL! | #NULL! | #NULL! | It is good fc | 1      | 1      |
| #NULL! | #NULL! | #NULL! | #NULL! | #NULL! |               | #NULL! | #NULL! |
| #NULL! | #NULL! | #NULL! | #NULL! | #NULL! |               | #NULL! | #NULL! |
| #NULL! | #NULL! | #NULL! | #NULL! | #NULL! |               | #NULL! | #NULL! |
| 1      | #NULL! | #NULL! | #NULL! | #NULL! | Was introd    | 1      | 1      |
| #NULL! | #NULL! | #NULL! | #NULL! | #NULL! |               | #NULL! | #NULL! |
| #NULL! | #NULL! | #NULL! | #NULL! | #NULL! |               | #NULL! | #NULL! |
| 1      | #NULL! | #NULL! | #NULL! | #NULL! | She has use   | 1      | 1      |
| 1      | 0      | 0      | 0      | 0      | for birth sp  | 1 0    | 1      |
| #NULL! | #NULL! | #NULL! | #NULL! | #NULL! |               | #NULL! | #NULL! |
| #NULL! | #NULL! | #NULL! | #NULL! | #NULL! |               | #NULL! | #NULL! |
| 1      | 0      | 0      | 0      | 0      | .i like it    | 1      | 1      |
| 1      | 0      | 0      | 0      | 0      | 0 good for hε | 1 0    | 1      |
| #NULL! | #NULL! | #NULL! | #NULL! | #NULL! | 1 For long sp | 1      | 1      |
| #NULL! | #NULL! | #NULL! | #NULL! | #NULL! |               | #NULL! | #NULL! |
| #NULL! | #NULL! | #NULL! | #NULL! | #NULL! |               | #NULL! | #NULL! |
| #NULL! | #NULL! | 1      | #NULL! | #NULL! | I am comfo    | 1      | 1      |
| 1      | #NULL! | #NULL! | #NULL! | #NULL! |               | 1      | 1      |
| #NULL! | #NULL! | #NULL! | #NULL! | #NULL! |               | #NULL! | #NULL! |
| #NULL! | #NULL! | #NULL! | #NULL! | #NULL! |               | #NULL! | #NULL! |
| #NULL! | #NULL! | #NULL! | #NULL! | #NULL! |               | #NULL! | #NULL! |
| #NULL! | #NULL! | #NULL! | #NULL! | #NULL! |               | #NULL! | #NULL! |
| 1      | #NULL! | #NULL! | 1      | #NULL! | To prevent    | 1      | 1      |
| #NULL! | #NULL! | #NULL! | #NULL! | #NULL! |               | #NULL! | #NULL! |
| #NULL! | #NULL! | #NULL! | #NULL! | #NULL! |               | #NULL! | #NULL! |
| #NULL! | #NULL! | #NULL! | #NULL! | #NULL! | 1 To prevent  | 1      | 1      |

|        |        |        |        |        |                 |        |                   |
|--------|--------|--------|--------|--------|-----------------|--------|-------------------|
| #NULL! | #NULL! | #NULL! | #NULL! | #NULL! |                 | #NULL! | #NULL!            |
| #NULL! | #NULL! | #NULL! | #NULL! | #NULL! | I want the      | #NULL! | I am aware #NULL! |
| #NULL! | #NULL! | #NULL! | #NULL! | #NULL! |                 | #NULL! | #NULL!            |
| #NULL! | #NULL! | #NULL! | #NULL! | #NULL! |                 | #NULL! | #NULL!            |
| 1      | #NULL! | #NULL! | #NULL! | #NULL! | That one is     | 1      | 1                 |
| #NULL! | #NULL! | #NULL! | #NULL! | #NULL! |                 | #NULL! | #NULL!            |
| #NULL! | #NULL! | #NULL! | #NULL! | #NULL! |                 | #NULL! | #NULL!            |
| #NULL! | #NULL! | #NULL! | #NULL! | #NULL! |                 | #NULL! | #NULL!            |
| #NULL! | #NULL! | #NULL! | #NULL! | #NULL! |                 | #NULL! | #NULL!            |
| 1      | #NULL! | #NULL! | #NULL! | #NULL! | nothing         | 1      | 1                 |
| #NULL! | #NULL! | 1      | #NULL! | #NULL! | Friend advi     | 1      | 1                 |
| #NULL! | 1      | #NULL! | #NULL! | #NULL! | I wanted m      | 1      | 1                 |
| 1      | #NULL! | #NULL! | #NULL! | #NULL! | Health staf     | 1      | 1                 |
| 1      | #NULL! | #NULL! | #NULL! | #NULL! | To try and :    | 1      | 1                 |
| #NULL! | 1      | #NULL! | #NULL! | #NULL! |                 | 1      | 1                 |
| 1      | #NULL! | #NULL! | 1      | #NULL! | It can be st    | 1      | 1                 |
| #NULL! | #NULL! | 1      | #NULL! | #NULL! | To correct      | 3      | 1                 |
| #NULL! | #NULL! | #NULL! | #NULL! | #NULL! |                 | #NULL! | #NULL!            |
| 1      | #NULL! | #NULL! | #NULL! | #NULL! | It is good fc   | 1      | 1                 |
| 1      | #NULL! | #NULL! | #NULL! | 1      | I was bleed     | 1      | 1                 |
| 1      | #NULL! | #NULL! | #NULL! | #NULL! | is safe and     | 1      | 1                 |
| 1      | #NULL! | #NULL! | #NULL! | #NULL! | It is good a    | 1      | 1                 |
| #NULL! | #NULL! | #NULL! | #NULL! | #NULL! | i am not co     | 4      | #NULL!            |
| 1      | #NULL! | #NULL! | #NULL! | #NULL! | Is good         | 1      | 1                 |
| #NULL! | #NULL! | #NULL! | #NULL! | #NULL! |                 | #NULL! | #NULL!            |
| 1      | #NULL! | #NULL! | #NULL! | #NULL! | Suitable for    | 1      | 1                 |
| 1      | #NULL! | #NULL! | #NULL! | #NULL! | Because of      | 1      | 1                 |
| 1      | #NULL! | #NULL! | #NULL! | #NULL! | Depo was t      | 1      | 1                 |
| #NULL! | #NULL! | #NULL! | #NULL! | #NULL! |                 | #NULL! | #NULL!            |
| #NULL! | #NULL! | #NULL! | #NULL! | #NULL! |                 | #NULL! | #NULL!            |
| #NULL! | #NULL! | #NULL! | #NULL! | #NULL! |                 | #NULL! | #NULL!            |
| 1      | 0      | 0      | 0      | 0      | 0 to prevent    | 1      | 1                 |
| 0      | 0      | 0      | 0      | 0      | 0               | #NULL! | #NULL!            |
| 1      | 0      | 0      | 0      | 0      | 0               | 1 0    | 1                 |
| 0      | 1      | 0      | 0      | 0      | 0 wanted a lc   | 1 0    | 1                 |
| 0      | 0      | 0      | 0      | 0      | 0               | #NULL! | #NULL!            |
| #NULL! | #NULL! | #NULL! | #NULL! | #NULL! |                 | #NULL! | #NULL!            |
| 1      | 0      | 0      | 0      | 0      | 0 nothing       | 1 0    | 1                 |
| #NULL! | #NULL! | #NULL! | #NULL! | #NULL! |                 | #NULL! | #NULL!            |
| #NULL! | #NULL! | #NULL! | #NULL! | #NULL! |                 | #NULL! | #NULL!            |
| #NULL! | #NULL! | #NULL! | #NULL! | #NULL! |                 | #NULL! | #NULL!            |
| 1      | 0      | 0      | 0      | 0      | 0 is good for   | 1 0    | 1                 |
| 0      | 0      | 0      | 0      | 0      | 1 i did not w   | 1 0    | 1                 |
| 1      | 0      | 1      | 0      | 0      | 0 it is helpful | 1 0    | 1                 |
| 1      | 0      | 0      | 0      | 0      | 0 method wa     | 1 0    | 1                 |
| 1      | 0      | 0      | 0      | 0      | 1 some one r    | 1      | 1                 |
| 1      | 0      | 0      | 0      | 0      | 0 method is     | 1 0    | 1                 |

|        |        |        |        |        |                |                |        |
|--------|--------|--------|--------|--------|----------------|----------------|--------|
| 0      | 1      | 0      | 0      | 0      |                | 1 0            | 1      |
| 1      | 0      | 0      | 0      | 0      | 0 method wa    | 1 0            | 1      |
| #NULL! | #NULL! | #NULL! | #NULL! | #NULL! |                | #NULL!         | #NULL! |
| 1      | 0      | 0      | 0      | 0      | 0 she likes it | 1 0            | 1      |
| 1      | 0      | 0      | 0      | 0      | 0 suitable for | 1              | 1      |
| 1      | 0      | 0      | 0      | 0      | 0 i like it    | 1              | 1      |
| #NULL! | #NULL! | #NULL! | #NULL! | #NULL! |                | #NULL!         | #NULL! |
| #NULL! | #NULL! | #NULL! | #NULL! | #NULL! |                | #NULL!         | #NULL! |
| 1      | 0      | 0      | 0      | 0      | 0 i like it    | 1 0            | 1      |
| 0      | 0      | 0      | 0      | 0      | 1 that was av  | 1 0            | 1      |
| #NULL! | #NULL! | #NULL! | #NULL! | #NULL! |                | #NULL!         | #NULL! |
| 1      | 0      | 0      | 0      | 0      |                | 1 0            | 1      |
| #NULL! | #NULL! | #NULL! | #NULL! | #NULL! |                | #NULL!         | #NULL! |
| 0      | 0      | 0      | 0      | 0      | 1              | 1 0            | 1      |
| 1      | 0      | 0      | 0      | 0      | 0              | 1 0            | 1      |
| #NULL! | #NULL! | #NULL! | #NULL! | #NULL! |                | #NULL!         | #NULL! |
| 0      | 0      | 0      | 0      | 0      | 1 long space   | 1 0            | 1      |
| 1      | 0      | 0      | 0      | 0      |                | 1 0            | 1      |
| #NULL! | #NULL! | #NULL! | #NULL! | #NULL! |                | #NULL!         | #NULL! |
| #NULL! | #NULL! | #NULL! | #NULL! | #NULL! |                | #NULL!         | #NULL! |
| 1      | 0      | 0      | 0      | 0      |                | 1              | 1      |
| 1      | #NULL! | #NULL! | #NULL! | #NULL! | That one is    | 1              | 1      |
| 1      | #NULL! | #NULL! | #NULL! | #NULL! | It is good fc  | 1              | 1      |
| 1      | #NULL! | #NULL! | #NULL! | #NULL! | I am comfo     | 1              | 1      |
| 1      | #NULL! | #NULL! | #NULL! | #NULL! |                | 1              | 1      |
| #NULL! | #NULL! | #NULL! | #NULL! | #NULL! | I like the nã  | 4 i already kr | #NULL! |
| #NULL! | #NULL! | #NULL! | #NULL! | #NULL! | 1              | 1              | 1      |
| 1      | #NULL! | #NULL! | #NULL! | #NULL! |                | 1              | 1      |
| #NULL! | #NULL! | #NULL! | #NULL! | #NULL! |                | 1              | #NULL! |
| 1      | #NULL! | #NULL! | #NULL! | #NULL! | Tha others     | 1              | 1      |
| #NULL! | #NULL! | #NULL! | #NULL! | #NULL! |                | #NULL!         | #NULL! |
| #NULL! | #NULL! | #NULL! | #NULL! | #NULL! |                | #NULL!         | #NULL! |
| 1      | #NULL! | #NULL! | #NULL! | #NULL! | To prevent     | 1              | 1      |
| 1      | #NULL! | #NULL! | #NULL! | #NULL! | 1              | 1              | 1      |
| #NULL! | #NULL! | #NULL! | #NULL! | #NULL! |                | #NULL!         | #NULL! |
| 1      | #NULL! | #NULL! | #NULL! | #NULL! |                | 1              | 1      |
| #NULL! | #NULL! | #NULL! | #NULL! | #NULL! |                | #NULL!         | #NULL! |
| #NULL! | #NULL! | #NULL! | #NULL! | #NULL! |                | #NULL!         | #NULL! |
| #NULL! | #NULL! |        | 1      | #NULL! | #NULL!         | 1              | 1      |
| #NULL! | #NULL! | #NULL! | #NULL! | #NULL! |                | #NULL!         | #NULL! |
| 1      | #NULL! | #NULL! | #NULL! | #NULL! | To enable s    | 1              | 1      |
| 1      | #NULL! | #NULL! | #NULL! | #NULL! | It was avail   | 1              | 1      |
| #NULL! | #NULL! | #NULL! | #NULL! | #NULL! |                | #NULL!         | #NULL! |
| 1      | #NULL! | #NULL! | #NULL! | #NULL! | It was gooc    | 1              | 1      |
| #NULL! | #NULL! | #NULL! | #NULL! | #NULL! |                | #NULL!         | #NULL! |
| #NULL! | #NULL! | #NULL! | #NULL! | #NULL! |                | #NULL!         | #NULL! |
| #NULL! | #NULL! | #NULL! | #NULL! | #NULL! |                | #NULL!         | #NULL! |



|        |        |        |        |        |                  |        |        |
|--------|--------|--------|--------|--------|------------------|--------|--------|
| 1      | #NULL! | #NULL! | #NULL! | 1      |                  | 1      | 1      |
| 1      | #NULL! | #NULL! | #NULL! | #NULL! |                  | 1      | 1      |
| 1      | #NULL! | #NULL! | #NULL! | #NULL! |                  | 1      | 1      |
| 1      | #NULL! | #NULL! | #NULL! | #NULL! |                  | 1      | 1      |
| #NULL! | #NULL! | #NULL! | #NULL! | #NULL! |                  | #NULL! | #NULL! |
| 1      | #NULL! | #NULL! | #NULL! | #NULL! | Is part of th    | 1      | 1      |
| #NULL! | #NULL! | #NULL! | #NULL! | #NULL! |                  | #NULL! | #NULL! |
| 1      | #NULL! | #NULL! | #NULL! | #NULL! | Depo gives       | 1      | 1      |
| 1      | 0      | 0      | 0      | 0      | 0 did not wa     | 1 0    | 1      |
| 1      | 0      | 0      | 0      | 0      | 0 good for he    | 1 0    | 1      |
| 1      | 0      | 0      | 0      | 0      | 0 is good for    | 1 0    | 1      |
| 1      | 0      | 0      | 0      | 0      | 0 depo is goc    | 1 0    | 1      |
| 1      | 0      | 0      | 0      | 0      | 0 just to try    | 1 0    | 1      |
| #NULL! | #NULL! | #NULL! | #NULL! | #NULL! |                  | #NULL! | #NULL! |
| #NULL! | #NULL! | #NULL! | #NULL! | #NULL! |                  | #NULL! | #NULL! |
| #NULL! | #NULL! | #NULL! | #NULL! | #NULL! |                  | #NULL! | #NULL! |
| 0      | 0      | 0      | 0      | 0      | 1 to be able t   | 1 0    | 1      |
| #NULL! | #NULL! | #NULL! | #NULL! | #NULL! |                  | #NULL! | #NULL! |
| #NULL! | #NULL! | #NULL! | #NULL! | #NULL! |                  | #NULL! | #NULL! |
| #NULL! | #NULL! | #NULL! | #NULL! | #NULL! |                  | #NULL! | #NULL! |
| 1      | 0      | 0      | 0      | 0      | 0 IS A METHC     | 1 0    | 1      |
| 1      | 0      | 0      | 0      | 0      | 0 i justb like i | 1 0    | 1      |
| #NULL! | #NULL! | #NULL! | #NULL! | #NULL! |                  | #NULL! | #NULL! |
| 0      | 0      | 1      | 0      | 0      | 0 to prevent     | 1 0    | 1      |
| 0      | 0      | 0      | 0      | 0      | 1 it is good fc  | 1      | 1      |
| #NULL! | #NULL! | #NULL! | #NULL! | #NULL! |                  | #NULL! | #NULL! |
| #NULL! | #NULL! | #NULL! | #NULL! | #NULL! |                  | #NULL! | #NULL! |
| 0      | 0      | 0      | 0      | 0      | 1 to be able t   | 2 0    | 1      |
| 1      | 0      | 0      | 1      | 0      | 1 is good for    | 1 0    | 1      |
| 0      | 0      | 0      | 0      | 0      | 1                | 1 0    | 1      |
| 0      | 0      | 0      | 0      | 0      | 1 it was the c   | 1 0    | 1      |
| 0      | 0      | 0      | 0      | 0      | 1 TO PREVEN      | 1 0    | 1      |
| 0      | 0      | 0      | 0      | 0      | 1 good for m     | 1 0    | 1      |
| 1      | 0      | 0      | 0      | 0      | 0 nothing        | 1      | 2      |
| #NULL! | #NULL! | #NULL! | #NULL! | #NULL! |                  | #NULL! | #NULL! |
| #NULL! | #NULL! | #NULL! | #NULL! | #NULL! |                  | #NULL! | #NULL! |
| 1      | 0      | 0      | 0      | 0      | 0                | #NULL! | 1      |
| 1      | 0      | 0      | 0      | 0      | 0 for birth sp   | 1 0    | 1      |
| #NULL! | #NULL! | #NULL! | #NULL! | #NULL! |                  | #NULL! | #NULL! |
| 1      | 0      | 0      | 0      | 0      | 0 for spacing    | 1 0    | 1      |
| 0      | 0      | 0      | 0      | 0      | 1 for long spa   | 1      | 1      |
| #NULL! | #NULL! | #NULL! | #NULL! | #NULL! |                  | #NULL! | #NULL! |
| 1      | 0      | 0      | 0      | 0      | 0 less side ef   | 1 0    | 1      |
| #NULL! | #NULL! | #NULL! | #NULL! | #NULL! | no side effe     | #NULL! | 1      |
| 1      | 0      | 0      | 0      | 0      | 0 no side effe   | 1 0    | 1      |
| 0      | 1      | 0      | 0      | 0      | 0 wanted to :    | 1      | 1      |

|        |        |        |        |        |        |              |                |        |
|--------|--------|--------|--------|--------|--------|--------------|----------------|--------|
| 0      | 1      | 0      | 0      | 0      | 0      | want my fir  | 1 0            | 1      |
| #NULL! | #NULL! | #NULL! | #NULL! | #NULL! | #NULL! |              | #NULL!         | #NULL! |
| 1      | 0      | 0      | 0      | 0      | 0      | less expens  | 1              | 1      |
| #NULL! | #NULL! | #NULL! | #NULL! | #NULL! | #NULL! | no side effe | 4 natural      | 1      |
| #NULL! | #NULL! | #NULL! | #NULL! | #NULL! | #NULL! | to avoid pr  | 4 natural      | 1      |
| #NULL! | #NULL! | #NULL! | #NULL! | #NULL! | #NULL! |              | #NULL!         | #NULL! |
| #NULL! | #NULL! | #NULL! | #NULL! | #NULL! | #NULL! |              | #NULL!         | #NULL! |
| 1      | 0      | 0      | 0      | 0      | 0      |              | 1              | 1      |
| #NULL! | #NULL! | #NULL! | #NULL! | #NULL! | #NULL! |              | #NULL!         | #NULL! |
| 0      | 1      | 0      | 0      | 0      | 0      | nothing      | 1              | 1      |
| #NULL! | #NULL! | #NULL! | #NULL! | #NULL! | #NULL! |              | #NULL!         | #NULL! |
| #NULL! | #NULL! | #NULL! | #NULL! | #NULL! | #NULL! |              | #NULL!         | #NULL! |
| #NULL! | #NULL! | #NULL! | #NULL! | #NULL! | #NULL! |              | #NULL!         | #NULL! |
| 1      | 0      | 0      | 0      | 0      | 0      |              | #NULL!         | 1      |
| 1      | 0      | 0      | 0      | 0      | 0      |              | 1              | 1      |
| 0      | 1      | 0      | 0      | 0      | 0      |              | 1              | 1      |
| 1      | 0      | 0      | 0      | 0      | 0      |              | 1              | 1      |
| 1      | 0      | 0      | 0      | 0      | 0      | it suits her | 1              | 1      |
| 1      | 0      | 0      | 0      | 0      | 0      |              | 1              | 1      |
| #NULL! | #NULL! | #NULL! | #NULL! | #NULL! | #NULL! |              | #NULL!         | #NULL! |
| 1      | 0      | 0      | 0      | 0      | 0      | it does not  | 1 0            | 1      |
| #NULL! | #NULL! | #NULL! | #NULL! | #NULL! | #NULL! |              | #NULL!         | #NULL! |
| 1      | 0      | 0      | 0      | 0      | 0      | less side ef | 1              | 1      |
| #NULL! | #NULL! | #NULL! | #NULL! | #NULL! | #NULL! |              | #NULL!         | #NULL! |
| 0      | 0      | 1      | 0      | 0      | 0      | no side effe | 1              | 1      |
| 1      | 0      | 0      | 0      | 0      | 0      | for child sp | 1              | 1      |
| 1      | 0      | 0      | 0      | 0      | 0      |              | 1              | 1      |
| 1      | 0      | 0      | 0      | 0      | 1      |              | 1              | 2      |
| 1      | 0      | 0      | 0      | 0      | 0      | is good for  | 1              | 1      |
| #NULL! | #NULL! | #NULL! | #NULL! | #NULL! | #NULL! |              | #NULL!         | #NULL! |
| #NULL! | #NULL! | #NULL! | #NULL! | #NULL! | #NULL! |              | #NULL!         | #NULL! |
| 0      | 0      | 0      | 0      | 0      | 1      | want a long  | 1              | 1      |
| 1      | 0      | 0      | 0      | 0      | 0      | good for m   | 1              | 1      |
| 1      | 0      | 0      | 0      | 0      | 0      | suitable for | 1 0            | 1      |
| 0      | 0      | 1      | 0      | 0      | 0      |              | 1 0            | 1      |
| 1      | 0      | 0      | 0      | 0      | 0      | nothing      | 1              | 1      |
| #NULL! | #NULL! | #NULL! | #NULL! | #NULL! | #NULL! |              | #NULL!         | #NULL! |
| 1      | 0      | 0      | 0      | 0      | 0      | nothing      | 1 0            | 1      |
| 0      | 1      | 0      | 0      | 0      | 0      | wanted to    | 1 0            | 1      |
| #NULL! | #NULL! | #NULL! | #NULL! | #NULL! | #NULL! | no side effe | #NULL! natural | 1      |
| #NULL! | #NULL! | #NULL! | #NULL! | #NULL! | #NULL! |              | #NULL!         | #NULL! |
| 0      | 0      | 0      | 1      | 0      | 0      |              | 1 0            | 1      |
| 1      | 0      | 0      | 1      | 0      | 0      |              | 1 0            | 1      |
| 1      | 0      | 0      | 0      | 0      | 0 0    |              | #NULL!         | 1      |
| 1      | 0      | 0      | 0      | 0      | 0      |              | 1 0            | 1      |
| #NULL! | #NULL! | #NULL! | #NULL! | #NULL! | #NULL! |              | #NULL!         | #NULL! |
| #NULL! | #NULL! | #NULL! | #NULL! | #NULL! | #NULL! |              | #NULL!         | #NULL! |

|        |        |        |        |        |                  |        |        |
|--------|--------|--------|--------|--------|------------------|--------|--------|
| 1      | 0      | 0      | 1      | 0      |                  | 1 0    | 1      |
| 1      | 0      | 0      | 0      | 0      | 0 less expens    | 1 0    | 1      |
| #NULL! | #NULL! | #NULL! | #NULL! | #NULL! |                  | #NULL! | #NULL! |
| 1      | 0      | 0      | 0      | 0      | 0 it suits her   | 1 0    | 1      |
| 1      | 0      | 0      | 0      | 0      | 0 nothing        | 1 0    | 1      |
| 1      | 0      | 0      | 0      | 0      | 0 is good for    | 1 0    | 1      |
| 1      | 0      | 0      | 0      | 0      | 0 to space m     | 1 0    | 1      |
| 1      | 0      | 0      | 0      | 0      | 0 is the best    | 1 0    | 1      |
| 1      | 0      | 0      | 0      | 0      | 0 is good for    | 1 0    | 1      |
| 1      | 0      | 0      | 0      | 0      | 0 is good for    | 1 0    | 1      |
| #NULL! | #NULL! | #NULL! | #NULL! | #NULL! |                  | #NULL! | #NULL! |
| 0      | 0      | 1      | 0      | 0      | 0 the others     | 1 0    | 1      |
| #NULL! | #NULL! | #NULL! | #NULL! | #NULL! |                  | #NULL! | #NULL! |
| 1      | 0      | 0      | 0      | 0      | 0 is good for    | 1 0    | 1      |
| 0      | 0      | 1      | 0      | 0      | 0 the pills is ξ | 1 0    | 1      |
| #NULL! | #NULL! | #NULL! | #NULL! | #NULL! |                  | #NULL! | #NULL! |
| 1      | 0      | 0      | 0      | 0      | 0 am comfor      | 1 0    | 1      |
| 0      | 0      | 0      | 1      | 0      | 0 nothing        | 1 0    | 1      |
| #NULL! | #NULL! | #NULL! | #NULL! | #NULL! |                  | #NULL! | #NULL! |
| #NULL! | #NULL! | #NULL! | #NULL! | #NULL! |                  | #NULL! | #NULL! |
| #NULL! | #NULL! | #NULL! | #NULL! | 1      |                  | 1      | 1      |
| #NULL! | #NULL! | #NULL! | #NULL! | #NULL! |                  | #NULL! | #NULL! |
| #NULL! | #NULL! | #NULL! | #NULL! | 1      |                  | 1      | 1      |
| #NULL! | #NULL! | #NULL! | #NULL! | 1      | Suitable for     | 1      | 1      |
| #NULL! | #NULL! | #NULL! | #NULL! | #NULL! |                  | #NULL! | #NULL! |
| #NULL! | #NULL! | #NULL! | #NULL! | #NULL! |                  | #NULL! | #NULL! |
| #NULL! | #NULL! | #NULL! | #NULL! | #NULL! |                  | #NULL! | #NULL! |
| 1      | #NULL! | #NULL! | #NULL! | #NULL! |                  | 1      | 1      |
| 1      | #NULL! | #NULL! | #NULL! | #NULL! |                  | 1      | 1      |
| #NULL! | 1      | #NULL! | #NULL! | #NULL! | I will not vi    | 1      | 1      |
| #NULL! | #NULL! | #NULL! | #NULL! | #NULL! | 1 It is safe fo  | 1      | 1      |
| 1      | #NULL! | #NULL! | #NULL! | #NULL! | Wants to tr      | 1      | 1      |
| 0      | 1      | 0      | 0      | 0      | 0 to rest a wl   | 1      | 1      |
| 0      | 0      | 0      | 1      | 0      | 0 it is good fc  | 1      | 1      |
| #NULL! | #NULL! | #NULL! | #NULL! | #NULL! |                  | #NULL! | #NULL! |
| #NULL! | #NULL! | #NULL! | #NULL! | #NULL! |                  | #NULL! | #NULL! |
| #NULL! | #NULL! | #NULL! | #NULL! | #NULL! |                  | #NULL! | #NULL! |
| 1      | 0      | 0      | 0      | 0      | 0 i just that o  | 1      | 1      |
| 1      | 0      | 0      | 0      | 0      | 0 it's ggod fo   | 1      | 1      |
| 1      | 0      | 0      | 0      | 0      | 0 a friend rec   | 1      | 1      |
| #NULL! | #NULL! | #NULL! | #NULL! | #NULL! |                  | #NULL! | #NULL! |
| #NULL! | #NULL! | #NULL! | #NULL! | #NULL! | not comfor       | 3      | 1      |
| 1      | 0      | 0      | 0      | 0      | 0 kit was goo    | 1      | 1      |
| #NULL! | #NULL! | #NULL! | #NULL! | #NULL! |                  | #NULL! | #NULL! |
| 1      | 0      | 0      | 0      | 0      | 0 triasl         | 1      | 1      |
| 1      | 0      | 0      | 0      | 0      | 0 i needed a     | 1 1    | 1      |
| 1      | 0      | 0      | 0      | 0      | 0 trial          | 1      | 1      |

|        |        |        |        |        |                |        |
|--------|--------|--------|--------|--------|----------------|--------|
| #NULL! | #NULL! | #NULL! | #NULL! | #NULL! | #NULL!         | #NULL! |
| 1      | 0      | 0      | 0      | 1      | the depo w     | 1      |
| #NULL! | #NULL! | #NULL! | #NULL! | #NULL! | not sure of    | #NULL! |
| 1      | 0      | 0      | 0      | 0      | trial          | #NULL! |
| 1      | 0      | 0      | 0      | 0      | wanted shc     | 1      |
| 1      | 0      | 0      | 0      | 0      | wanted to      | 1      |
| 1      | 0      | 0      | 0      | 0      | it is good fc  | 1      |
| 1      | 0      | 0      | 0      | 0      | nothing        | 1      |
| 1      | 0      | 0      | 0      | 0      | to space m     | 1      |
| #NULL! | #NULL! | 1      | #NULL! | #NULL! |                | 3      |
| 1      | 0      | 0      | 0      | 0      | was conver     | 1      |
| 1      | 0      | 1      | 0      | 0      | i still have r | 1      |
| 1      | 0      | 1      | 0      | 0      |                | 1      |
| 1      | #NULL! | #NULL! | #NULL! | #NULL! | My husban      | 1      |

| F2Ifyesdoe | F3IFNOwhy      | E4Whodeci | Parity0 | Gender3 | sons | Daughters | E6children\ | HHealthPrc |   |
|------------|----------------|-----------|---------|---------|------|-----------|-------------|------------|---|
| 1          |                |           | 3       | 4       | 2    | 1         | 3           | 5          | 2 |
| #NULL!     | if i tell him, |           | 1       | 2       | 2    | #NULL!    | 2           | 5          | 2 |
| 1          |                |           | 1       | 2       | 1    | 1         | 1           | 3          | 1 |
| #NULL!     |                |           | 3       | 3       | 1    | 3         | 0           | 4          | 2 |
| #NULL!     | because he     |           | 1       | 3       | 2    | 1         | 2           | 6          | 1 |
| 1          |                |           | 3       | 2       | 1    | 2         | #NULL!      | 4          | 2 |
| #NULL!     |                | #NULL!    |         | 2       | 1    | 1         | 1           | 3          | 2 |
| #NULL!     |                |           | 3       | 1       | 1    | #NULL!    | 1           | 3          | 1 |
| 1          |                |           | 1       | 2       | 1    | 2         | #NULL!      | 3          | 2 |
| 1          |                |           | 3       | 2       | 2    | 1         | 1           | 4          | 1 |
| 1          |                | #NULL!    |         | 4       | 1    | 3         | 1           | 4          | 2 |
| #NULL!     |                | #NULL!    |         | 2       | 2    | 1         | 1           | 3          | 2 |
| #NULL!     |                | #NULL!    |         | 2       | 1    | 2         | #NULL!      | 5          | 1 |
| #NULL!     |                |           | 3       | 2       | 1    | 2         | #NULL!      | 2          | 2 |
| 1          |                |           | 3       | 2       | 2    | #NULL!    | 2           | 4          | 2 |
| 1          |                | #NULL!    |         | 2       | 2    | #NULL!    | 2           | 4          | 2 |
| #NULL!     |                |           | 3       | 2       | 1    | 2         | #NULL!      | 5          | 2 |
| 1          |                | #NULL!    |         | 3       | 1    | 2         | 1           | 3          | 2 |
| #NULL!     |                |           | 3       | 4       | 1    | 4         | #NULL!      | 4          | 2 |
| 1          |                |           | 1       | 3       | 2    | 2         | 1           | 4          | 2 |
| 1          |                |           | 1       | 2       | 2    | #NULL!    | 2           | 5          | 2 |
| 1          |                | #NULL!    |         | 2       | 2    | #NULL!    | 2           | 4          | 2 |
| #NULL!     |                |           | 1       | 4       | 1    | 3         | 1           | 4          | 2 |
| 1          |                |           | 1       | 2       | 2    | 1         | 1           | 2          | 2 |
| #NULL!     | I don't stay   | #NULL!    |         | 3       | 1    | 1         | 1           | 3          | 2 |
| #NULL!     |                | #NULL!    |         | 4       | 2    | 1         | 3           | 6          | 2 |
| #NULL!     |                |           | 1       | 5       | 2    | 1         | 4           | 5          | 2 |
| 1          |                |           | 3       | 2       | 2    | 1         | 1           | 5          | 2 |
| 1          |                |           | 3       | 3       | 2    | 2         | #NULL!      | 5          | 2 |
| 1          |                | #NULL!    |         | 4       | 2    | 2         | 2           | 5          | 2 |
| #NULL!     |                |           | 3       | 2       | 2    | 1         | 1           | 5          | 2 |
| 1          |                |           | 3       | 2       | 1    | 2         | #NULL!      | 5          | 2 |
| 1          |                | #NULL!    |         | 2       | 1    | 2         | #NULL!      | 5          | 2 |
| #NULL!     |                | #NULL!    |         | 3       | 2    | 2         | 1           | 4          | 2 |
| #NULL!     |                |           | 1       | 4       | 2    | 2         | 2           | 4          | 2 |
| 1          |                |           | 1       | 2       | 1    | 1         | 1           | 4          | 2 |
| 1          |                |           | 1       | 2       | 1    | 2         | #NULL!      | 4          | 2 |
| 2          |                | #NULL!    |         | 2       | 1    | 1         | 1           | 4          | 2 |
| #NULL!     |                |           | 1       | 2       | 2    | 1         | 1           | 3          | 2 |
| 1          |                |           | 1       | 5       | 2    | 3         | 1           | 4          | 2 |
| 1          |                | #NULL!    |         | 3       | 1    | 2         | #NULL!      | 4          | 2 |
| #NULL!     | not marrie     |           | 1       | 3       | 1    | 3         | #NULL!      | 3          | 2 |
| #NULL!     | not marrie     |           | 3       | 3       | 1    | 3         | #NULL!      | 3          | 2 |
| 1          |                |           | 3       | 5       | 1    | 4         | 1           | 6          | 2 |
| 1          |                | #NULL!    |         | 3       | 2    | 1         | 2           | 5          | 2 |
| #NULL!     |                |           | 3       | 4       | 1    | 3         | 1           | 5          | 2 |

|               |        |   |   |   |        |        |   |
|---------------|--------|---|---|---|--------|--------|---|
| 1             | #NULL! | 3 | 2 | 1 | 2      | 5      | 2 |
| 1             | #NULL! | 2 | 1 | 2 | #NULL! | 4      | 2 |
| #NULL!        | #NULL! | 2 | 1 | 2 | #NULL! | 4      | 2 |
| #NULL!        | #NULL! | 1 | 1 | 1 | 1      | 5      | 2 |
| #NULL!        | 1      | 2 | 1 | 1 | 1      | 5      | 2 |
| #NULL!        | #NULL! | 2 | 1 | 1 | 1      | 4      | 2 |
| 2 dead        | #NULL! | 5 | 1 | 4 | 3      | 7      | 2 |
| #NULL!        | 3      | 1 | 2 | 1 | 1      | #NULL! | 2 |
| #NULL!        | #NULL! | 4 | 1 | 3 | 1      | 4      | 2 |
| 1             | #NULL! | 6 | 2 | 1 | 1      | 1      | 2 |
| #NULL!        | #NULL! | 2 | 1 | 2 | 0      | 5      | 2 |
| #NULL!        | 3      | 2 | 1 | 1 | 0      | 4      | 2 |
| #NULL!        | 3      | 3 | 1 | 1 | 2      | 4      | 2 |
| 1             | #NULL! | 2 | 2 | 2 | 0      | 4      | 2 |
| 1             | 3      | 2 | 1 | 1 | 11     | 4      | 2 |
| #NULL!        | #NULL! | 5 | 2 | 2 | 3      | 5      | 2 |
| 1             | #NULL! | 2 | 2 | 1 | 1      | 4      | 2 |
| #NULL!        | #NULL! | 4 | 2 | 0 | 3      | 10     | 2 |
| #NULL!        | #NULL! | 3 | 2 | 0 | 3      | 5      | 2 |
| #NULL!        | #NULL! | 4 | 1 | 2 | 2      | 10     | 2 |
| #NULL!        | #NULL! | 6 | 2 | 2 | 4      | 7      | 2 |
| #NULL!        | 1      | 8 | 1 | 3 | 5      | 10     | 2 |
| #NULL!        | #NULL! | 2 | 2 | 0 | 2      | 4      | 2 |
| #NULL!        | #NULL! | 4 | 1 | 2 | 1      | 10     | 2 |
| #NULL!        | #NULL! | 6 | 1 | 2 | 2      | 10     | 2 |
| #NULL!        | #NULL! | 3 | 2 | 1 | 2      | 4      | 2 |
| #NULL!        | #NULL! | 5 | 1 | 3 | 2      | 7      | 2 |
| #NULL!        | #NULL! | 3 | 2 | 0 | 3      | 3      | 2 |
| #NULL!        | 2      | 2 | 2 | 0 | 2      | 3      | 2 |
| #NULL!        | #NULL! | 5 | 2 | 0 | 5      | 5      | 1 |
| 1             | 2      | 2 | 2 | 0 | 2      | 5      | 2 |
| #NULL!        | 2      | 4 | 1 | 4 | 2      | 6      | 2 |
| 1             | 1      | 4 | 2 | 2 | 1      | 5      | 2 |
| 1             | 3      | 3 | 2 | 2 | 1      | 4      | 2 |
| 2 he will not | #NULL! | 4 | 1 | 3 | 1      | 4      | 2 |
| 1             | 3      | 6 | 1 | 3 | 3      | 6      | 1 |
| #NULL!        | #NULL! | 5 | 2 | 5 | 1      | 6      | 2 |
| 1             | #NULL! | 3 | 2 | 1 | 2      | 3      | 2 |
| #NULL!        | #NULL! | 6 | 2 | 1 | 5      | 7      | 2 |
| #NULL!        | 3      | 2 | 1 | 2 | 0      | 3      | 2 |
| #NULL!        | 3      | 3 | 1 | 2 | 1      | 5      | 2 |
| 1             | #NULL! | 2 | 1 | 1 | 1      | 3      | 2 |
| 1             | #NULL! | 3 | 2 | 1 | 2      | 4      | 2 |
| #NULL!        | 3      | 2 | 2 | 0 | 2      | 2      | 2 |
| #NULL!        | #NULL! | 3 | 2 | 1 | 2      | 4      | 2 |
| 1             | #NULL! | 2 | 1 | 2 | #NULL! | 2      | 2 |
| #NULL!        | #NULL! | 3 | 2 | 2 | 1      | 10     | 2 |

|                  |            |        |   |   |   |   |    |   |
|------------------|------------|--------|---|---|---|---|----|---|
| #NULL!           |            | 3      | 5 | 1 | 3 | 2 | 11 | 2 |
| #NULL!           | #NULL!     |        | 2 | 2 | 2 | 2 | 5  | 2 |
| 1                | #NULL!     |        | 1 | 2 | 1 | 1 | 3  | 2 |
| #NULL!           | #NULL!     |        | 5 | 2 | 1 | 4 | 10 | 2 |
| #NULL!           | #NULL!     |        | 5 | 2 | 1 | 4 | 10 | 2 |
| #NULL!           | #NULL!     |        | 4 | 1 | 2 | 2 | 10 | 2 |
| #NULL!           |            | 3      | 3 | 1 | 2 | 1 | 5  | 2 |
| #NULL!           |            | 3      | 2 | 2 | 1 | 1 | 4  | 2 |
| #NULL!           |            | 1      | 4 | 2 | 2 | 2 | 6  | 2 |
| 1                | #NULL!     |        | 3 | 2 | 0 | 3 | 7  | 2 |
| 1                | #NULL!     |        | 2 | 1 | 2 | 0 | 6  | 2 |
| 1                | #NULL!     |        | 4 | 1 | 3 | 0 | 10 | 2 |
| #NULL!           |            | 3      | 1 | 1 | 2 | 2 | 6  | 2 |
| #NULL!           |            | 3      | 6 | 1 | 1 | 5 | 6  | 2 |
| #NULL!           | #NULL!     |        | 2 | 2 | 0 | 2 | 4  | 2 |
| 1                | #NULL!     |        | 3 | 2 | 1 | 2 | 5  | 2 |
| 1                | #NULL!     |        | 6 | 1 | 1 | 5 | 6  | 2 |
| #NULL!           | #NULL!     |        | 5 | 2 | 1 | 3 | 6  | 2 |
| #NULL!           | #NULL!     |        | 3 | 1 | 2 | 1 | 6  | 2 |
| #NULL!           | #NULL!     |        | 3 | 1 | 2 | 1 | 6  | 2 |
| #NULL!           | #NULL!     |        | 6 | 1 | 3 | 3 | 6  | 2 |
| #NULL!           | #NULL!     |        | 2 | 1 | 1 | 1 | 4  | 2 |
| #NULL!           |            | 3      | 3 | 1 | 3 | 0 | 4  | 2 |
| #NULL!           | #NULL!     |        | 3 | 1 | 1 | 2 | 3  | 2 |
| #NULL!           | #NULL!     |        | 3 | 2 | 2 | 1 | 4  | 2 |
| 1                |            | 3      | 2 | 2 | 0 | 2 | 5  | 2 |
| #NULL!           |            | 3      | 2 | 2 | 0 | 2 | 4  | 2 |
| #NULL!           |            | 1      | 6 | 2 | 2 | 4 | 6  | 2 |
| 1                | 1          | 1      | 2 | 2 | 1 | 1 | 4  | 2 |
| 1                |            | 3      | 3 | 2 | 1 | 2 | 5  | 2 |
| #NULL!           | was not ma | #NULL! | 3 | 2 | 1 | 2 | 5  | 2 |
| 1                |            | 3      | 2 | 1 | 1 | 1 | 5  | 2 |
| 1                | #NULL!     |        | 4 | 1 | 2 | 1 | 7  | 2 |
| #NULL!           | #NULL!     |        | 6 | 2 | 3 | 3 | 6  | 2 |
| 1                |            | 3      | 2 | 2 | 1 | 1 | 5  | 2 |
| #NULL!           | #NULL!     |        | 2 | 1 | 2 | 0 | 4  | 2 |
| #NULL!           |            | 3      | 2 | 2 | 1 | 0 | 7  | 2 |
| 1                |            | 3      | 3 | 2 | 2 | 1 | 4  | 2 |
| #NULL!           |            | 3      | 3 | 1 | 1 | 2 | 10 | 2 |
| 1                |            | 3      | 2 | 1 | 1 | 1 | 4  | 2 |
| 1                |            | 3      | 4 | 2 | 3 | 1 | 6  | 2 |
| 1                |            | 3      | 7 | 1 | 3 | 2 | 7  | 2 |
| 1                | #NULL!     |        | 4 | 1 | 3 | 1 | 6  | 2 |
| 1                |            | 1      | 4 | 1 | 0 | 3 | 10 | 2 |
| 1                | #NULL!     |        | 2 | 2 | 1 | 1 | 4  | 2 |
| #NULL!           | #NULL!     |        | 4 | 1 | 2 | 2 | 8  | 2 |
| 2 i didnt tell l |            | 1      | 4 | 2 | 2 | 2 | 4  | 2 |

|                    |        |   |   |   |   |   |    |   |
|--------------------|--------|---|---|---|---|---|----|---|
| #NULL!             |        | 3 | 4 | 2 | 2 | 2 | 4  | 2 |
| #NULL!             | #NULL! |   | 2 | 2 | 1 | 1 | 3  | 2 |
| 1                  |        | 3 | 4 | 1 | 2 | 2 | 4  | 2 |
| 1                  |        | 1 | 2 | 1 | 1 | 1 | 4  | 2 |
| #NULL!             |        | 1 | 3 | 1 | 2 | 1 | 4  | 2 |
| 2 he didnt as      |        | 3 | 2 | 1 | 2 | 0 | 2  | 2 |
| #NULL! border not  |        | 2 | 5 | 2 | 2 | 2 | 5  | 2 |
| #NULL! he wouldnt  |        | 3 | 2 | 1 | 2 | 0 | 3  | 2 |
| 1                  | #NULL! |   | 2 | 1 | 2 | 0 | 4  | 2 |
| 2 he was not       |        | 2 | 2 | 1 | 2 | 0 | 3  | 1 |
| 1                  |        | 3 | 4 | 2 | 3 | 1 | 4  | 2 |
| #NULL!             | #NULL! |   | 3 | 2 | 0 | 3 | 10 | 2 |
| #NULL!             | #NULL! |   | 5 | 2 | 2 | 3 | 5  | 2 |
| 1                  |        | 3 | 4 | 1 | 4 | 0 | 7  | 2 |
| #NULL!             | #NULL! |   | 4 | 1 | 3 | 1 | 5  | 2 |
| #NULL!             | #NULL! |   | 2 | 1 | 1 | 1 | 4  | 2 |
| #NULL!             | #NULL! |   | 6 | 2 | 2 | 3 | 5  | 2 |
| 1                  |        | 2 | 5 | 2 | 3 | 1 | 5  | 2 |
| #NULL!             | #NULL! |   | 2 | 1 | 2 | 0 | 4  | 2 |
| 1                  |        | 3 | 5 | 2 | 2 | 3 | 6  | 2 |
| 1                  |        | 3 | 2 | 2 | 1 | 1 | 2  | 2 |
| #NULL!             | #NULL! |   | 4 | 1 | 2 | 2 | 4  | 2 |
| 1                  |        | 1 | 6 | 1 | 3 | 3 | 6  | 2 |
| #NULL!             | #NULL! |   | 2 | 2 | 1 | 1 | 4  | 2 |
| 1                  |        | 1 | 4 | 2 | 2 | 2 | 5  | 2 |
| #NULL!             | #NULL! |   | 2 | 2 | 1 | 0 | 3  | 2 |
| 1                  |        | 1 | 5 | 1 | 1 | 3 | 5  | 2 |
| #NULL!             | #NULL! |   | 2 | 1 | 2 | 0 | 4  | 2 |
| 1                  |        | 3 | 2 | 2 | 0 | 2 | 3  | 2 |
| 1                  |        | 2 | 4 | 1 | 2 | 2 | 6  | 2 |
| 1                  |        | 3 | 5 | 1 | 4 | 1 | 5  | 2 |
| #NULL!             | #NULL! |   | 2 | 1 | 1 | 1 | 4  | 2 |
| #NULL! he wasnt ir |        | 1 | 6 | 1 | 3 | 3 | 6  | 2 |
| #NULL!             | #NULL! |   | 2 | 1 | 1 | 1 | 5  | 2 |
| #NULL!             | #NULL! |   | 2 | 1 | 2 | 0 | 5  | 2 |
| #NULL! he wont ag  |        | 1 | 2 | 1 | 2 | 0 | 5  | 2 |
| #NULL!             | #NULL! |   | 3 | 2 | 1 | 2 | 4  | 2 |
| #NULL!             | #NULL! |   | 3 | 1 | 2 | 1 | 3  | 2 |
| #NULL!             | #NULL! |   | 2 | 2 | 0 | 2 | 4  | 2 |
| #NULL!             | #NULL! |   | 5 | 1 | 4 | 1 | 5  | 2 |
| 1                  |        | 2 | 6 | 1 | 3 | 3 | 6  | 2 |
| #NULL!             | #NULL! |   | 2 | 2 | 1 | 1 | 6  | 2 |
| 1                  |        | 1 | 3 | 2 | 2 | 1 | 5  | 2 |
| #NULL!             | #NULL! |   | 4 | 1 | 2 | 2 | 5  | 2 |
| #NULL!             | #NULL! |   | 5 | 1 | 1 | 4 | 7  | 2 |
| 1                  |        | 3 | 2 | 1 | 2 | 0 | 5  | 2 |
| #NULL!             | #NULL! |   | 4 | 1 | 3 | 1 | 4  | 2 |



|        |            |   |   |        |   |        |   |   |
|--------|------------|---|---|--------|---|--------|---|---|
| #NULL! | #NULL!     | 2 | 2 | 0      | 1 | 4      | 2 |   |
| 1      | 3          | 3 | 1 | 2      | 1 | 3      | 2 |   |
| #NULL! | #NULL!     | 2 | 2 | 1      | 1 | 2      | 2 |   |
| 1      | 3          | 4 | 1 | 1      | 3 | 4      | 2 |   |
| 1      | 3          | 3 | 2 | 2      | 1 | 3      | 2 |   |
| 1      | 3          | 2 | 2 | #NULL! | 2 | 4      | 2 |   |
| 1      | 1          | 4 | 2 | 2      | 2 | #NULL! | 2 |   |
| #NULL! | #NULL!     | 2 | 2 | 1      | 1 | 4      | 2 |   |
| 1      | 2          | 3 | 2 | 1      | 2 | 6      | 2 |   |
| 1      | 3          | 5 | 1 | 3      | 2 | 6      | 2 |   |
| #NULL! | #NULL!     | 2 | 2 | 1      | 1 | #NULL! | 2 |   |
| #NULL! | #NULL!     | 2 | 2 | 0      | 2 | 10     | 2 |   |
| 1      | 2          | 3 | 1 | 2      | 1 | 10     | 2 |   |
| #NULL! | #NULL!     | 2 | 2 | 0      | 2 | 8      | 2 |   |
| 1      | 3          | 3 | 2 | 0      | 3 | 6      | 2 |   |
| #NULL! | #NULL!     | 4 | 1 | 3      | 1 | 4      | 2 |   |
| 1      | 3          | 5 | 2 | 3      | 2 | 5      | 2 |   |
| 1      | 3          | 3 | 2 | 1      | 2 | 4      | 2 |   |
| #NULL! | #NULL!     | 2 | 2 | 1      | 0 | 5      | 2 |   |
| 1      | 3          | 8 | 1 | 6      | 2 | 8      | 2 |   |
| 1      | 1          | 3 | 2 | 2      | 1 | 5      | 2 |   |
| 1      | 3          | 4 | 2 | 1      | 3 | 4      | 2 |   |
| #NULL! | #NULL!     | 2 | 2 | 0      | 2 | 2      | 2 |   |
| #NULL! | He would n | 1 | 5 | 1      | 4 | 1      | 7 | 2 |
| 1      | 3          | 2 | 2 | 1      | 1 | 3      | 2 |   |
| #NULL! | #NULL!     | 2 | 1 | 1      | 1 | 4      | 2 |   |
| #NULL! | #NULL!     | 1 | 2 | 0      | 1 | 3      | 2 |   |
| 1      | 3          | 3 | 1 | 3      | 0 | 4      | 2 |   |
| 1      | 3          | 3 | 1 | 2      | 1 | 3      | 2 |   |
| 1      | 3          | 3 | 2 | 2      | 1 | 4      | 2 |   |
| 1      | 3          | 2 | 1 | 1      | 1 | 3      | 2 |   |
| 1      | 3          | 3 | 2 | 1      | 2 | 3      | 2 |   |
| #NULL! | 1          | 6 | 2 | 2      | 4 | 6      | 2 |   |
| 1      | 3          | 3 | 2 | 0      | 3 | 4      | 2 |   |
| 1      | 3          | 3 | 1 | 2      | 1 | 4      | 2 |   |
| 1      | 3          | 3 | 2 | 1      | 2 | 3      | 2 |   |
| 1      | 3          | 2 | 1 | 2      | 0 | 2      | 1 |   |
| #NULL! | #NULL!     | 2 | 2 | 1      | 1 | 4      | 2 |   |
| 1      | 3          | 2 | 1 | 1      | 1 | 4      | 2 |   |
| #NULL! | #NULL!     | 4 | 1 | 2      | 2 | 4      | 2 |   |
| 1      | 1          | 2 | 1 | 2      | 0 | 3      | 2 |   |
| #NULL! | #NULL!     | 2 | 1 | 1      | 1 | 4      | 2 |   |
| #NULL! | #NULL!     | 2 | 1 | 1      | 1 | 5      | 2 |   |
| #NULL! | #NULL!     | 2 | 1 | 1      | 1 | 3      | 2 |   |
| 1      | 3          | 2 | 1 | 1      | 1 | 6      | 2 |   |
| 1      | 3          | 2 | 1 | 1      | 1 | 5      | 2 |   |
| #NULL! | #NULL!     | 2 | 1 | 2      | 0 | 6      | 2 |   |

|        |        |   |   |        |        |        |   |
|--------|--------|---|---|--------|--------|--------|---|
| #NULL! | #NULL! | 2 | 2 | 0      | 2      | 4      | 2 |
| #NULL! | #NULL! | 2 | 1 | 2      | #NULL! | 6      | 2 |
| #NULL! | #NULL! | 3 | 2 | 0      | 3      | 6      | 2 |
| #NULL! | #NULL! | 4 | 1 | 4      | #NULL! | 4      | 2 |
| 1      | 1      | 5 | 2 | 1      | 4      | 5      | 2 |
| 2      | 3      | 2 | 2 | 0      | 2      | 5      | 2 |
| #NULL! | #NULL! | 2 | 2 | 0      | 2      | 5      | 2 |
| #NULL! | #NULL! | 2 | 2 | 1      | 1      | 6      | 2 |
| #NULL! | #NULL! | 6 | 2 | 3      | 3      | 6      | 2 |
| #NULL! | #NULL! | 3 | 2 | 0      | 3      | 4      | 2 |
| 1      | 3      | 3 | 2 | 1      | 2      | #NULL! | 2 |
| #NULL! | #NULL! | 2 | 1 | 1      | 1      | 5      | 2 |
| 1      | 3      | 2 | 1 | 1      | 1      | 3      | 2 |
| #NULL! | #NULL! | 2 | 1 | 1      | 1      | 6      | 2 |
| 1      | 1      | 3 | 2 | 2      | 1      | 6      | 2 |
| #NULL! | #NULL! | 3 | 1 | 1      | 2      | 6      | 2 |
| #NULL! | #NULL! | 2 | 2 | #NULL! | 2      | 6      | 2 |
| #NULL! | #NULL! | 5 | 1 | 2      | 3      | 6      | 2 |
| #NULL! | #NULL! | 6 | 2 | 4      | 2      | #NULL! | 2 |
| #NULL! | #NULL! | 4 | 2 | 1      | 3      | 5      | 2 |
| 1      | 3      | 5 | 2 | 1      | 4      | 5      | 2 |
| #NULL! | #NULL! | 3 | 2 | 1      | 1      | 9      | 2 |
| #NULL! | #NULL! | 2 | 2 | 1      | 1      | #NULL! | 2 |
| #NULL! | #NULL! | 5 | 1 | #NULL! | 5      | 10     | 2 |
| 1      | 1      | 2 | 1 | 1      | 1      | #NULL! | 2 |
| #NULL! | #NULL! | 4 | 1 | 2      | 2      | 6      | 2 |
| #NULL! | #NULL! | 2 | 1 | 2      | #NULL! | 5      | 2 |
| 1      | 3      | 3 | 2 | 1      | 2      | 4      | 2 |
| 1      | 3      | 6 | 2 | 4      | 2      | 6      | 2 |
| #NULL! | #NULL! | 3 | 2 | 1      | 2      | 3      | 2 |
| #NULL! | #NULL! | 8 | 1 | 3      | 5      | 10     | 2 |
| 1      | 3      | 2 | 1 | 1      | 1      | 3      | 2 |
| 1      | 1      | 5 | 2 | 3      | 2      | 6      | 2 |
| 1      | 3      | 2 | 1 | 1      | 1      | 4      | 2 |
| #NULL! | #NULL! | 2 | 2 | 0      | 2      | 5      | 2 |
| #NULL! | #NULL! | 3 | 2 | 2      | 1      | 3      | 2 |
| 1      | 3      | 3 | 2 | 1      | 2      | 5      | 2 |
| 1      | 3      | 3 | 1 | 3      | 0      | #NULL! | 2 |
| #NULL! | #NULL! | 2 | 2 | 1      | 1      | 2      | 2 |
| #NULL! | #NULL! | 3 | 1 | 2      | 1      | 4      | 2 |
| #NULL! | #NULL! | 3 | 2 | 0      | 3      | 4      | 2 |
| #NULL! | #NULL! | 2 | 1 | 2      | 0      | 4      | 2 |
| #NULL! | #NULL! | 3 | 2 | 1      | 2      | 3      | 2 |
| 1      | 3      | 3 | 2 | 2      | 1      | 4      | 2 |
| #NULL! | #NULL! | 2 | 1 | 1      | 1      | 4      | 2 |
| #NULL! | #NULL! | 3 | 1 | 3      | 0      | 4      | 2 |
| 1      | 3      | 2 | 1 | 1      | 1      | 3      | 2 |

|                 |        |   |   |   |   |   |   |
|-----------------|--------|---|---|---|---|---|---|
| #NULL!          | #NULL! | 2 | 1 | 1 | 1 | 4 | 2 |
| #NULL!          | 1      | 3 | 1 | 2 | 1 | 3 | 2 |
| #NULL!          | #NULL! | 3 | 1 | 2 | 1 | 5 | 1 |
| #NULL!          | #NULL! | 2 | 1 | 1 | 1 | 3 | 2 |
| 2 He did not    | 3      | 2 | 2 | 1 | 1 | 4 | 2 |
| #NULL!          | #NULL! | 2 | 1 | 1 | 1 | 4 | 2 |
| #NULL!          | #NULL! | 3 | 1 | 3 | 0 | 3 | 2 |
| #NULL!          | #NULL! | 2 | 1 | 1 | 1 | 4 | 2 |
| #NULL!          | #NULL! | 2 | 1 | 1 | 1 | 2 | 2 |
| 1               | 3      | 2 | 1 | 2 | 0 | 3 | 2 |
| 1               | 3      | 2 | 1 | 1 | 1 | 4 | 2 |
| 2 I did it outs | 1      | 2 | 2 | 0 | 2 | 4 | 2 |
| 1               | 2      | 2 | 2 | 0 | 2 | 4 | 2 |
| 1               | 3      | 2 | 2 | 0 | 2 | 3 | 2 |
| 1               | 3      | 5 | 1 | 0 | 3 | 3 | 2 |
| 1               | 3      | 4 | 1 | 2 | 2 | 4 | 2 |
| 1               | 3      | 3 | 1 | 3 | 0 | 3 | 2 |
| #NULL!          | #NULL! | 2 | 2 | 0 | 2 | 2 | 2 |
| 1               | 1      | 4 | 2 | 2 | 2 | 4 | 2 |
| 1               | 1      | 2 | 2 | 0 | 2 | 5 | 2 |
| 1               | 1      | 2 | 1 | 2 | 0 | 4 | 2 |
| 1               | 1      | 4 | 1 | 2 | 2 | 4 | 2 |
| 1               | 1      | 2 | 2 | 1 | 1 | 3 | 2 |
| 1               | 1      | 3 | 1 | 3 | 0 | 5 | 2 |
| #NULL!          | #NULL! | 3 | 1 | 2 | 2 | 4 | 2 |
| 1               | 1      | 3 | 2 | 1 | 2 | 5 | 2 |
| 1               | 3      | 2 | 2 | 1 | 1 | 4 | 2 |
| 1               | 3      | 3 | 2 | 0 | 3 | 4 | 2 |
| #NULL!          | #NULL! | 3 | 1 | 3 | 0 | 3 | 2 |
| #NULL!          | #NULL! | 3 | 2 | 0 | 3 | 4 | 2 |
| #NULL!          | #NULL! | 3 | 2 | 2 | 1 | 4 | 2 |
| 1               | 3      | 2 | 1 | 1 | 1 | 3 | 2 |
| #NULL!          | #NULL! | 2 | 2 | 0 | 2 | 4 | 2 |
| 1               | 3      | 3 | 1 | 1 | 2 | 3 | 2 |
| 1 0             | 2      | 3 | 1 | 2 | 1 | 4 | 2 |
| #NULL!          | #NULL! | 4 | 1 | 3 | 1 | 5 | 2 |
| #NULL!          | #NULL! | 3 | 1 | 2 | 1 | 6 | 2 |
| 1               | 1      | 2 | 2 | 1 | 1 | 4 | 2 |
| #NULL!          | #NULL! | 5 | 2 | 3 | 2 | 5 | 2 |
| #NULL!          | #NULL! | 2 | 1 | 1 | 1 | 3 | 2 |
| #NULL!          | #NULL! | 3 | 2 | 0 | 3 | 5 | 2 |
| 1               | 3      | 2 | 1 | 2 | 0 | 3 | 2 |
| 1               | 3      | 4 | 2 | 2 | 2 | 5 | 2 |
| 1               | 3      | 4 | 1 | 3 | 1 | 5 | 2 |
| 1               | 3      | 3 | 2 | 0 | 3 | 4 | 2 |
| 1               | 3      | 3 | 2 | 1 | 2 | 4 | 2 |
| 1               | 2      | 5 | 2 | 2 | 1 | 5 | 2 |

|                 |        |   |   |   |   |        |   |
|-----------------|--------|---|---|---|---|--------|---|
| 1               | 3      | 2 | 2 | 1 | 1 | 3      | 2 |
| 1               | 3      | 3 | 1 | 2 | 1 | 4      | 2 |
| #NULL!          | #NULL! | 4 | 1 | 2 | 3 | 5      | 2 |
| 1               | 3      | 2 | 1 | 1 | 1 | 5      | 2 |
| 1               | 1      | 2 | 2 | 0 | 2 | 10     | 2 |
| 1               | 3      | 2 | 1 | 2 | 0 | 4      | 2 |
| #NULL!          | #NULL! | 2 | 1 | 2 | 0 | 3      | 2 |
| #NULL!          | #NULL! | 2 | 1 | 2 | 0 | 3      | 2 |
| 1               | 5      | 2 | 1 | 1 | 1 | 4      | 2 |
| 1               | 3      | 2 | 2 | 1 | 1 | 4      | 2 |
| #NULL!          | #NULL! | 4 | 2 | 2 | 2 | 5      | 2 |
| 1               | 3      | 3 | 2 | 1 | 2 | 4      | 2 |
| #NULL!          | #NULL! | 2 | 2 | 0 | 2 | 4      | 2 |
| 1               | 3      | 4 | 2 | 1 | 3 | 4      | 2 |
| 1               | 3      | 6 | 2 | 3 | 3 | 6      | 2 |
| #NULL!          | #NULL! | 2 | 1 | 2 | 0 | 4      | 2 |
| 1               | 3      | 5 | 2 | 2 | 3 | 5      | 2 |
| 1 0             | 3      | 3 | 2 | 1 | 2 | 5      | 2 |
| #NULL!          | #NULL! | 3 | 1 | 3 | 0 | 4      | 2 |
| #NULL!          | #NULL! | 4 | 1 | 2 | 1 | 4      | 2 |
| 1               | 3      | 2 | 2 | 1 | 1 | 4      | 2 |
| 1               | 3      | 2 | 2 | 1 | 1 | 4      | 2 |
| 1               | 3      | 2 | 1 | 2 | 0 | 3      | 2 |
| 1               | 3      | 3 | 2 | 1 | 2 | 3      | 2 |
| 1               | 3      | 2 | 1 | 2 | 0 | 3      | 2 |
| #NULL!          | #NULL! | 4 | 2 | 3 | 1 | 4      | 2 |
| 1               | 3      | 4 | 1 | 3 | 1 | #NULL! | 2 |
| 1               | 3      | 5 | 2 | 3 | 2 | 5      | 2 |
| #NULL!          | #NULL! | 2 | 1 | 1 | 1 | 5      | 2 |
| 1               | 3      | 2 | 1 | 1 | 1 | 3      | 2 |
| #NULL!          | #NULL! | 2 | 1 | 1 | 1 | 4      | 2 |
| #NULL!          | #NULL! | 1 | 2 | 0 | 1 | 3      | 2 |
| 2 I did not in! | 1      | 5 | 2 | 1 | 4 | 5      | 2 |
| 1               | 3      | 5 | 2 | 3 | 2 | 5      | 2 |
| #NULL!          | #NULL! | 5 | 1 | 2 | 2 | #NULL! | 2 |
| 1               | 3      | 3 | 2 | 1 | 2 | 3      | 2 |
| #NULL!          | #NULL! | 1 | 2 | 0 | 1 | 3      | 2 |
| #NULL!          | #NULL! | 2 | 1 | 1 | 1 | 4      | 2 |
| 1               | 3      | 4 | 1 | 4 | 0 | 4      | 2 |
| #NULL!          | #NULL! | 1 | 1 | 1 | 0 | 3      | 2 |
| 1               | 1      | 4 | 2 | 3 | 1 | 5      | 1 |
| 1               | 3      | 2 | 1 | 1 | 1 | 4      | 2 |
| #NULL!          | #NULL! | 2 | 1 | 2 | 0 | 3      | 2 |
| 1               | 3      | 2 | 1 | 1 | 1 | 3      | 2 |
| #NULL!          | #NULL! | 2 | 2 | 1 | 1 | 2      | 2 |
| #NULL!          | #NULL! | 2 | 1 | 1 | 1 | 2      | 2 |
| #NULL!          | #NULL! | 2 | 1 | 1 | 1 | 3      | 2 |

|        |            |   |   |        |        |        |   |   |
|--------|------------|---|---|--------|--------|--------|---|---|
| 1      | 3          | 2 | 1 | 1      | 1      | 3      | 2 |   |
| 1      | 3          | 2 | 2 | 0      | 2      | 2      | 2 |   |
| 1      | 3          | 2 | 1 | 1      | 1      | 3      | 2 |   |
| 1      | 3          | 3 | 2 | 0      | 3      | #NULL! | 2 |   |
| #NULL! | #NULL!     | 1 | 1 | 1      | 0      | 2      | 2 |   |
| 1      | 3          | 3 | 2 | 0      | 3      | 5      | 2 |   |
| #NULL! | #NULL!     | 3 | 1 | 2      | 1      | 4      | 2 |   |
| 1      | 1          | 5 | 2 | 3      | 2      | 5      | 2 |   |
| 1      | 1          | 4 | 1 | 3      | 1      | 4      | 2 |   |
| 1      | 1          | 5 | 2 | 3      | 2      | 6      | 2 |   |
| 1      | 1          | 6 | 2 | 3      | 3      | 6      | 2 |   |
| 1      | 2          | 4 | 1 | 2      | 2      | 4      | 2 |   |
| 1      | 3          | 3 | 1 | 3      | 0      | 5      | 2 |   |
| #NULL! | #NULL!     | 3 | 1 | 1      | 2      | 5      | 2 |   |
| #NULL! | #NULL!     | 3 | 2 | 2      | 1      | 3      | 2 |   |
| #NULL! | #NULL!     | 1 | 2 | 1      | 1      | 3      | 2 |   |
| 1      | 3          | 5 | 1 | 3      | 2      | 6      | 2 |   |
| #NULL! | #NULL!     | 2 | 1 | 2      | #NULL! | 2      | 2 |   |
| #NULL! | #NULL!     | 4 | 1 | 1      | 3      | 4      | 2 |   |
| #NULL! | #NULL!     | 2 | 1 | 1      | 1      | 4      | 2 |   |
| #NULL! | #NULL!     | 3 | 2 | 2      | 1      | 3      | 2 |   |
| 1      | 3          | 3 | 2 | 1      | 2      | 4      | 2 |   |
| 1      | 1          | 2 | 1 | 1      | 1      | 3      | 2 |   |
| #NULL! | #NULL!     | 2 | 2 | #NULL! | 2      | 2      | 2 |   |
| 1      | 1          | 5 | 2 | 2      | 3      | 5      | 2 |   |
| 1      | 3          | 2 | 2 | #NULL! | 2      | 6      | 2 |   |
| #NULL! | #NULL!     | 3 | 2 | 1      | 2      | 4      | 2 |   |
| #NULL! | #NULL!     | 2 | 1 | 2      | #NULL! | 2      | 2 |   |
| 1      | 1          | 2 | 1 | 1      | 1      | 4      | 2 |   |
| 1      | 3          | 5 | 1 | 4      | 1      | 5      | 2 |   |
| 1      | 3          | 2 | 1 | 2      | 0      | 2      | 2 |   |
| 1      | 1          | 2 | 2 | 1      | 1      | 5      | 2 |   |
| 1      | 3          | 2 | 1 | 2      | #NULL! | 3      | 2 |   |
| 1      | 3          | 3 | 1 | 2      | 1      | 3      | 2 |   |
| #NULL! | he would n | 1 | 7 | 1      | 4      | 3      | 7 | 2 |
| #NULL! | #NULL!     | 2 | 1 | 1      | 1      | 6      | 2 |   |
| #NULL! | #NULL!     | 2 | 1 | 2      | #NULL! | 5      | 2 |   |
| 1      | 3          | 2 | 2 | 1      | 1      | #NULL! | 2 |   |
| 1      | 3          | 6 | 2 | 4      | 2      | 6      | 2 |   |
| #NULL! | #NULL!     | 2 | 1 | 2      | #NULL! | 9      | 2 |   |
| 1      | 3          | 3 | 2 | 0      | 3      | 4      | 2 |   |
| 1      | 3          | 4 | 2 | 2      | 2      | 4      | 2 |   |
| #NULL! | #NULL!     | 2 | 1 | 1      | 1      | 4      | 2 |   |
| 1      | 3          | 5 | 1 | 3      | 2      | 10     | 2 |   |
| 1      | 3          | 2 | 1 | 1      | 1      | 4      | 2 |   |
| 1      | 3          | 6 | 2 | 2      | 4      | 7      | 2 |   |
| 1      | 3          | 4 | 1 | 2      | 2      | 4      | 2 |   |

|                    |        |    |   |   |   |    |   |
|--------------------|--------|----|---|---|---|----|---|
| 1                  | 1      | 2  | 2 | 1 | 1 | 5  | 2 |
| #NULL!             | #NULL! | 2  | 2 | 0 | 2 | 5  | 2 |
| 1                  | 3      | 4  | 2 | 0 | 4 | 15 | 2 |
| 1                  | 3      | 4  | 2 | 2 | 2 | 6  | 2 |
| 1                  | 3      | 2  | 1 | 1 | 1 | 10 | 2 |
| #NULL!             | #NULL! | 4  | 1 | 1 | 3 | 20 | 2 |
| #NULL!             | #NULL! | 6  | 1 | 4 | 2 | 7  | 2 |
| 1                  | 3      | 6  | 2 | 2 | 4 | 6  | 2 |
| #NULL!             | #NULL! | 2  | 1 | 1 | 1 | 3  | 2 |
| 1                  | 3      | 4  | 1 | 3 | 1 | 4  | 2 |
| #NULL!             | #NULL! | 3  | 2 | 1 | 2 | 6  | 2 |
| #NULL!             | #NULL! | 3  | 2 | 0 | 3 | 10 | 2 |
| #NULL!             | #NULL! | 3  | 1 | 1 | 2 | 5  | 2 |
| 1                  | 3      | 6  | 1 | 2 | 3 | 6  | 2 |
| 1                  | 3      | 3  | 1 | 3 | 0 | 10 | 2 |
| 1                  | 3      | 2  | 1 | 2 | 0 | 4  | 2 |
| 1                  | 2      | 4  | 2 | 1 | 3 | 5  | 2 |
| 1                  | 3      | 4  | 2 | 1 | 3 | 4  | 2 |
| 1                  | 3      | 2  | 2 | 0 | 2 | 4  | 2 |
| #NULL!             | #NULL! | 2  | 2 | 1 | 1 | 4  | 2 |
| 1                  | 3      | 2  | 2 | 1 | 1 | 5  | 2 |
| #NULL!             | #NULL! | 3  | 2 | 0 | 2 | 4  | 2 |
| 1                  | 3      | 4  | 2 | 1 | 3 | 4  | 2 |
| #NULL!             | #NULL! | 2  | 1 | 1 | 1 | 6  | 2 |
| 1                  | 3      | 4  | 1 | 3 | 2 | 5  | 2 |
| 1                  | 3      | 4  | 1 | 3 | 1 | 5  | 2 |
| 1                  | 3      | 2  | 1 | 1 | 1 | 6  | 2 |
| #NULL! he will not | 1      | 3  | 1 | 2 | 1 | 4  | 2 |
| 1                  | 3      | 2  | 2 | 1 | 1 | 4  | 2 |
| #NULL!             | #NULL! | 3  | 1 | 1 | 2 | 5  | 2 |
| #NULL!             | #NULL! | 1  | 2 | 3 | 3 | 6  | 2 |
| 1                  | 3      | 2  | 2 | 1 | 1 | 4  | 2 |
| 1                  | 3      | 4  | 1 | 2 | 2 | 5  | 2 |
| 1                  | 3      | 5  | 2 | 1 | 4 | 6  | 2 |
| 1                  | 3      | 5  | 1 | 2 | 0 | 4  | 2 |
| 1                  | 3      | 3  | 1 | 2 | 1 | 5  | 2 |
| #NULL!             | #NULL! | 7  | 1 | 3 | 4 | 7  | 2 |
| 1                  | 3      | 2  | 1 | 2 | 0 | 4  | 2 |
| 1                  | 3      | 3  | 2 | 2 | 1 | 6  | 2 |
| 1                  | 3      | 4  | 1 | 2 | 2 | 4  | 2 |
| #NULL!             | #NULL! | 6  | 2 | 2 | 4 | 10 | 2 |
| 1                  | 3      | 5  | 2 | 2 | 3 | 5  | 2 |
| 1                  | 3      | 5  | 1 | 2 | 3 | 10 | 2 |
| 1                  | 3      | 2  | 1 | 1 | 1 | 4  | 2 |
| 1                  | 3      | 4  | 1 | 3 | 1 | 6  | 2 |
| #NULL!             | #NULL! | 10 | 2 | 2 | 5 | 10 | 2 |
| #NULL!             | #NULL! | 3  | 1 | 2 | 1 | 5  | 2 |

|           |        |   |   |   |   |    |   |
|-----------|--------|---|---|---|---|----|---|
| 1         | 3      | 4 | 2 | 1 | 3 | 5  | 2 |
| 1         | 3      | 4 | 2 | 2 | 2 | 5  | 2 |
| #NULL!    | #NULL! | 4 | 1 | 2 | 2 | 6  | 2 |
| 1         | 3      | 3 | 2 | 2 | 1 | 4  | 2 |
| 1         | 3      | 2 | 1 | 1 | 1 | 4  | 2 |
| 1         | 4      | 3 | 2 | 2 | 1 | 4  | 2 |
| 1         | 3      | 4 | 1 | 2 | 2 | 4  | 2 |
| 1         | 3      | 3 | 2 | 0 | 3 | 6  | 2 |
| 1         | 1      | 3 | 1 | 2 | 1 | 6  | 2 |
| 1         | 1      | 3 | 1 | 2 | 1 | 6  | 2 |
| #NULL!    | #NULL! | 5 | 1 | 1 | 5 | 5  | 2 |
| 1         | 3      | 3 | 1 | 1 | 2 | 6  | 2 |
| #NULL!    | #NULL! | 3 | 1 | 1 | 2 | 4  | 2 |
| 2         | 1      | 3 | 1 | 3 | 0 | 4  | 2 |
| 1         | 3      | 3 | 1 | 3 | 0 | 4  | 2 |
| #NULL!    | #NULL! | 6 | 1 | 5 | 1 | 20 | 2 |
| 1         | 3      | 3 | 2 | 2 | 1 | 4  | 2 |
| 1         | 3      | 5 | 1 | 4 | 1 | 6  | 2 |
| #NULL!    | #NULL! | 4 | 1 | 3 | 1 | 5  | 2 |
| #NULL!    | #NULL! | 5 | 2 | 3 | 1 | 4  | 2 |
| 1         | 3      | 3 | 1 | 2 | 1 | 5  | 2 |
| #NULL!    | #NULL! | 7 | 2 | 1 | 6 | 7  | 2 |
| 1         | 3      | 5 | 2 | 2 | 3 | 7  | 2 |
| 1         | 3      | 2 | 2 | 1 | 2 | 10 | 2 |
| #NULL!    | #NULL! | 6 | 2 | 1 | 5 | 6  | 2 |
| #NULL!    | #NULL! | 2 | 1 | 1 | 1 | 4  | 2 |
| #NULL!    | #NULL! | 9 | 2 | 1 | 8 | 9  | 2 |
| 1         | 3      | 3 | 1 | 2 | 1 | 3  | 2 |
| 1         | 3      | 5 | 1 | 3 | 2 | 5  | 2 |
| 1         | 1      | 3 | 2 | 1 | 2 | 4  | 2 |
| 1         | 3      | 4 | 1 | 2 | 2 | 4  | 2 |
| 1         | 1      | 3 | 2 | 1 | 2 | 4  | 2 |
| 1         | 1      | 2 | 1 | 0 | 4 | 4  | 2 |
| 1         | 1      | 4 | 2 | 1 | 2 | 5  | 2 |
| #NULL!    | #NULL! | 2 | 1 | 1 | 1 | 4  | 2 |
| #NULL!    | #NULL! | 3 | 2 | 1 | 2 | 6  | 2 |
| #NULL!    | #NULL! | 3 | 2 | 1 | 2 | 4  | 2 |
| 1         | 3      | 2 | 2 | 1 | 1 | 5  | 2 |
| 1         | 1      | 5 | 1 | 2 | 3 | 5  | 2 |
| 2 nothing | 1      | 2 | 2 | 2 | 2 | 3  | 2 |
| #NULL!    | #NULL! | 3 | 2 | 1 | 2 | 6  | 2 |
| 1         | 3      | 2 | 2 | 1 | 1 | 2  | 2 |
| 1 1       | 1      | 3 | 2 | 2 | 1 | 4  | 2 |
| #NULL!    | #NULL! | 2 | 2 | 0 | 1 | 3  | 2 |
| 1         | 1      | 5 | 1 | 2 | 2 | 4  | 2 |
| 1         | 1      | 3 | 2 | 0 | 3 | 5  | 2 |
| 1         | 1      | 6 | 1 | 2 | 2 | 4  | 2 |

|               |        |   |   |   |   |   |   |
|---------------|--------|---|---|---|---|---|---|
| #NULL!        | #NULL! | 2 | 1 | 1 | 1 | 4 | 2 |
| 1             | 1      | 2 | 2 | 1 | 1 | 4 | 2 |
| 1             | 1      | 2 | 1 | 1 | 1 | 3 | 2 |
| 1             | 1      | 2 | 1 | 1 | 1 | 3 | 2 |
| 1             | 1      | 4 | 2 | 1 | 1 | 3 | 2 |
| 2 he will not | #NULL! | 3 | 1 | 1 | 2 | 4 | 2 |
| 1             | 1      | 3 | 2 | 2 | 1 | 3 | 2 |
| 1             | 1      | 3 | 2 | 2 | 1 | 3 | 2 |
| 1             | 1      | 6 | 2 | 1 | 5 | 6 | 2 |
| 1             | 2      | 2 | 1 | 2 | 0 | 3 | 2 |
| 1             | 3      | 3 | 2 | 1 | 2 | 6 | 2 |
| 1             | 1      | 3 | 2 | 1 | 2 | 4 | 2 |
| 1             | 1      | 4 | 2 | 2 | 2 | 3 | 2 |
| 1             | 2      | 3 | 2 | 1 | 2 | 6 | 2 |



























|        |        |        |        |        |   |   |
|--------|--------|--------|--------|--------|---|---|
| #NULL! | #NULL! | #NULL! | #NULL! | #NULL! | 1 | 1 |
| #NULL! | #NULL! | #NULL! | #NULL! | #NULL! | 1 | 1 |
| #NULL! | #NULL! | #NULL! | #NULL! | #NULL! | 1 | 1 |
| #NULL! | #NULL! | #NULL! | #NULL! | #NULL! | 1 | 1 |
| #NULL! | #NULL! | #NULL! | #NULL! | #NULL! | 1 | 1 |
| #NULL! | #NULL! | #NULL! | #NULL! | #NULL! | 1 | 1 |
| #NULL! | #NULL! | #NULL! | #NULL! | #NULL! | 1 | 2 |
| #NULL! | #NULL! | #NULL! | #NULL! | #NULL! | 1 | 2 |
| #NULL! | #NULL! | #NULL! | #NULL! | #NULL! | 1 | 2 |
| #NULL! | #NULL! | #NULL! | #NULL! | #NULL! | 1 | 2 |
| #NULL! | #NULL! | #NULL! | #NULL! | #NULL! | 1 | 1 |
| #NULL! | #NULL! | #NULL! | #NULL! | #NULL! | 1 | 1 |
| #NULL! | #NULL! | #NULL! | #NULL! | #NULL! | 1 | 1 |
| #NULL! | #NULL! | #NULL! | #NULL! | #NULL! | 1 | 1 |



|   |   |   |               |   |   |   |   |
|---|---|---|---------------|---|---|---|---|
| 1 | 1 | 5 | 4             | 0 | 0 | 0 | 0 |
| 1 | 1 | 5 | 4             | 0 | 0 | 0 | 0 |
| 1 | 1 | 5 | 4             | 0 | 0 | 0 | 0 |
| 1 | 1 | 5 | 4             | 0 | 0 | 0 | 0 |
| 1 | 1 | 5 | 4             | 0 | 0 | 0 | 0 |
| 1 | 1 | 5 | 4             | 0 | 0 | 0 | 0 |
| 1 | 1 | 5 | 4             | 0 | 0 | 0 | 0 |
| 1 | 2 | 5 | 4             | 0 | 0 | 0 | 0 |
| 1 | 1 | 5 | 4             | 0 | 0 | 0 | 0 |
| 1 | 1 | 5 | 4             | 0 | 0 | 0 | 0 |
| 1 | 2 | 4 | 4             | 0 | 0 | 0 | 0 |
| 1 | 1 | 4 | 4             | 0 | 0 | 0 | 0 |
| 1 | 1 | 4 | 4             | 0 | 0 | 0 | 0 |
| 1 | 2 | 4 | 4             | 0 | 0 | 0 | 0 |
| 1 | 2 | 4 | 4             | 0 | 0 | 0 | 0 |
| 1 | 1 | 5 | 4             | 0 | 0 | 0 | 0 |
| 1 | 1 | 4 | 4             | 0 | 0 | 0 | 0 |
| 1 | 2 | 5 | 4             | 0 | 0 | 0 | 0 |
| 1 | 1 | 5 | 4             | 0 | 0 | 0 | 0 |
| 1 | 1 | 5 | 4             | 0 | 0 | 0 | 0 |
| 2 | 2 | 5 | 4 we get fror | 0 | 1 | 1 | 1 |
| 1 | 1 | 5 | 4             | 0 | 0 | 0 | 0 |
| 1 | 1 | 5 | 4             | 0 | 0 | 0 | 0 |
| 1 | 1 | 5 | 1             | 0 | 0 | 0 | 0 |
| 1 | 1 | 5 | 4             | 0 | 0 | 0 | 0 |
| 1 | 1 | 5 | 4             | 0 | 0 | 0 | 0 |
| 1 | 1 | 5 | 4             | 0 | 0 | 0 | 0 |
| 1 | 1 | 5 | 4             | 0 | 0 | 0 | 0 |
| 1 | 1 | 5 | 4             | 0 | 0 | 0 | 0 |
| 1 | 1 | 5 | 4             | 0 | 0 | 0 | 0 |
| 1 | 1 | 4 | 3             | 0 | 0 | 0 | 0 |
| 1 | 1 | 5 | 4             | 0 | 0 | 0 | 0 |
| 1 | 2 | 5 | 4             | 0 | 0 | 0 | 0 |
| 1 | 1 | 5 | 4             | 0 | 0 | 0 | 0 |
| 1 | 1 | 5 | 4             | 0 | 0 | 0 | 0 |
| 1 | 2 | 5 | 4             | 0 | 0 | 0 | 0 |
| 1 | 2 | 5 | 4             | 0 | 0 | 0 | 0 |
| 1 | 1 | 5 | 4             | 0 | 0 | 0 | 0 |
| 1 | 2 | 4 | 4             | 0 | 0 | 0 | 0 |
| 1 | 1 | 5 | 4             | 0 | 0 | 0 | 0 |
| 1 | 1 | 5 | 4             | 0 | 0 | 0 | 0 |
| 1 | 1 | 5 | 4             | 0 | 0 | 0 | 0 |
| 1 | 1 | 5 | 4             | 0 | 0 | 0 | 0 |
| 1 | 1 | 4 | 4             | 0 | 0 | 0 | 0 |
| 1 | 1 | 5 | 4             | 0 | 0 | 0 | 0 |
| 1 | 1 | 4 | 4             | 0 | 0 | 0 | 0 |
| 1 | 1 | 5 | 4             | 0 | 0 | 0 | 0 |

|   |   |   |   |   |   |   |   |
|---|---|---|---|---|---|---|---|
| 1 | 1 | 4 | 4 | 0 | 0 | 0 | 0 |
| 1 | 1 | 5 | 4 | 0 | 0 | 0 | 0 |
| 1 | 1 | 5 | 4 | 0 | 0 | 0 | 0 |
| 1 | 1 | 5 | 4 | 0 | 0 | 0 | 0 |
| 1 | 1 | 5 | 4 | 0 | 0 | 0 | 0 |
| 1 | 1 | 4 | 4 | 0 | 0 | 0 | 0 |
| 1 | 1 | 4 | 3 | 0 | 0 | 0 | 0 |
| 1 | 1 | 5 | 3 | 0 | 0 | 0 | 0 |
| 1 | 1 | 5 | 4 | 0 | 0 | 0 | 0 |
| 1 | 1 | 4 | 4 | 0 | 0 | 0 | 0 |
| 1 | 1 | 5 | 4 | 0 | 0 | 0 | 0 |
| 1 | 1 | 5 | 4 | 0 | 0 | 0 | 0 |
| 1 | 1 | 5 | 4 | 0 | 0 | 0 | 0 |
| 1 | 1 | 5 | 4 | 0 | 0 | 0 | 0 |
| 1 | 1 | 5 | 4 | 0 | 0 | 0 | 0 |
| 1 | 1 | 5 | 4 | 0 | 0 | 0 | 0 |
| 1 | 1 | 5 | 4 | 0 | 0 | 0 | 0 |
| 1 | 1 | 5 | 4 | 0 | 0 | 0 | 0 |
| 1 | 1 | 5 | 4 | 0 | 0 | 0 | 0 |
| 1 | 1 | 5 | 4 | 0 | 0 | 0 | 0 |
| 1 | 1 | 5 | 4 | 0 | 0 | 0 | 0 |
| 1 | 1 | 5 | 4 | 0 | 0 | 0 | 0 |
| 1 | 1 | 5 | 5 | 0 | 0 | 0 | 0 |
| 1 | 1 | 5 | 4 | 0 | 0 | 0 | 0 |
| 1 | 2 | 5 | 4 | 0 | 0 | 0 | 0 |
| 1 | 1 | 5 | 4 | 0 | 0 | 0 | 0 |
| 1 | 1 | 5 | 5 | 0 | 0 | 0 | 0 |
| 1 | 1 | 5 | 4 | 0 | 0 | 0 | 0 |
| 1 | 1 | 5 | 4 | 0 | 0 | 0 | 0 |
| 1 | 2 | 5 | 4 | 0 | 0 | 0 | 0 |
| 1 | 2 | 5 | 4 | 0 | 0 | 0 | 0 |
| 1 | 1 | 5 | 4 | 0 | 0 | 0 | 0 |
| 1 | 1 | 5 | 4 | 0 | 0 | 0 | 0 |
| 1 | 1 | 5 | 4 | 0 | 0 | 0 | 0 |
| 1 | 1 | 5 | 4 | 0 | 0 | 0 | 0 |
| 1 | 1 | 5 | 4 | 0 | 0 | 0 | 0 |
| 1 | 1 | 5 | 4 | 0 | 0 | 0 | 0 |
| 1 | 1 | 5 | 4 | 0 | 0 | 0 | 0 |
| 1 | 1 | 5 | 4 | 0 | 0 | 0 | 0 |
| 1 | 2 | 5 | 4 | 0 | 0 | 0 | 0 |
| 1 | 1 | 5 | 4 | 0 | 0 | 0 | 0 |
| 1 | 1 | 5 | 4 | 0 | 0 | 0 | 0 |
| 1 | 1 | 5 | 4 | 0 | 0 | 0 | 0 |
| 1 | 1 | 5 | 4 | 0 | 0 | 0 | 0 |
| 1 | 1 | 5 | 4 | 0 | 0 | 0 | 0 |
| 1 | 1 | 5 | 4 | 0 | 0 | 0 | 0 |
| 1 | 1 | 5 | 4 | 0 | 0 | 0 | 0 |
| 1 | 2 | 4 | 4 | 0 | 0 | 0 | 0 |
| 1 | 1 | 5 | 4 | 0 | 0 | 0 | 0 |

|   |   |   |               |   |   |   |   |
|---|---|---|---------------|---|---|---|---|
| 1 | 1 | 5 | 4             | 0 | 0 | 0 | 0 |
| 1 | 1 | 5 | 4             | 0 | 0 | 0 | 0 |
| 1 | 1 | 5 | 4             | 0 | 0 | 0 | 0 |
| 1 | 2 | 4 | 4             | 0 | 0 | 0 | 0 |
| 1 | 1 | 5 | 4             | 0 | 0 | 0 | 0 |
| 1 | 1 | 5 | 4             | 0 | 0 | 0 | 0 |
| 1 | 1 | 5 | 4             | 0 | 0 | 0 | 0 |
| 1 | 1 | 5 | 4             | 0 | 0 | 0 | 0 |
| 1 | 2 | 5 | 4             | 0 | 0 | 0 | 0 |
| 2 | 2 | 3 | 3 from region | 1 | 1 | 0 | 1 |
| 1 | 1 | 5 | 4             | 0 | 0 | 0 | 0 |
| 1 | 1 | 5 | 4             | 0 | 0 | 0 | 0 |
| 1 | 2 | 4 | 4             | 0 | 0 | 0 | 0 |
| 1 | 3 | 5 | 4             | 0 | 0 | 0 | 0 |
| 1 | 3 | 5 | 4             | 0 | 0 | 0 | 0 |
| 1 | 1 | 5 | 4             | 0 | 0 | 0 | 0 |
| 1 | 2 | 5 | 4             | 0 | 0 | 0 | 0 |
| 1 | 1 | 5 | 4             | 0 | 0 | 0 | 0 |
| 1 | 1 | 5 | 4             | 0 | 0 | 0 | 0 |
| 1 | 3 | 5 | 4             | 0 | 0 | 0 | 0 |
| 1 | 3 | 5 | 4             | 0 | 0 | 0 | 0 |
| 1 | 3 | 4 | 4             | 0 | 0 | 0 | 0 |
| 1 | 2 | 4 | 4             | 0 | 0 | 0 | 0 |
| 1 | 3 | 5 | 4             | 0 | 0 | 0 | 0 |
| 1 | 2 | 5 | 4             | 0 | 0 | 0 | 0 |
| 1 | 1 | 5 | 4             | 0 | 0 | 0 | 0 |
| 1 | 2 | 4 | 4             | 0 | 0 | 0 | 0 |
| 1 | 1 | 4 | 4             | 0 | 0 | 0 | 0 |
| 1 | 2 | 5 | 4             | 0 | 0 | 0 | 0 |
| 1 | 1 | 5 | 4             | 0 | 0 | 0 | 0 |
| 1 | 1 | 5 | 4             | 0 | 0 | 0 | 0 |
| 1 | 1 | 5 | 4             | 0 | 0 | 0 | 0 |
| 1 | 1 | 5 | 5             | 0 | 0 | 0 | 0 |
| 1 | 1 | 5 | 4             | 0 | 0 | 0 | 0 |
| 1 | 1 | 5 | 4             | 0 | 0 | 0 | 0 |
| 1 | 1 | 5 | 4             | 0 | 0 | 0 | 0 |
| 1 | 1 | 5 | 4             | 0 | 0 | 0 | 0 |
| 1 | 1 | 5 | 4             | 0 | 0 | 0 | 0 |
| 1 | 2 | 5 | 4             | 0 | 0 | 0 | 0 |
| 1 | 1 | 5 | 5             | 0 | 0 | 0 | 0 |
| 1 | 1 | 5 | 5             | 0 | 0 | 0 | 0 |
| 1 | 1 | 5 | 5             | 0 | 0 | 0 | 0 |
| 1 | 1 | 5 | 5             | 0 | 0 | 0 | 0 |
| 1 | 1 | 5 | 4             | 0 | 0 | 0 | 0 |
| 1 | 2 | 4 | 4             | 0 | 0 | 0 | 0 |
| 1 | 1 | 5 | 4             | 0 | 0 | 0 | 0 |
| 1 | 1 | 5 | 4             | 0 | 0 | 0 | 0 |
| 1 | 1 | 5 | 4             | 0 | 0 | 0 | 0 |





|   |   |   |   |   |   |   |   |
|---|---|---|---|---|---|---|---|
| 1 | 1 | 5 | 4 | 0 | 0 | 0 | 0 |
| 1 | 1 | 5 | 4 | 0 | 0 | 0 | 0 |
| 1 | 1 | 5 | 4 | 0 | 0 | 0 | 0 |
| 1 | 1 | 5 | 4 | 0 | 0 | 0 | 0 |
| 1 | 1 | 5 | 4 | 0 | 0 | 0 | 0 |
| 1 | 1 | 5 | 4 | 0 | 0 | 0 | 0 |
| 1 | 1 | 5 | 4 | 0 | 0 | 0 | 0 |
| 1 | 1 | 5 | 4 | 0 | 0 | 0 | 0 |
| 1 | 1 | 5 | 4 | 0 | 0 | 0 | 0 |
| 1 | 1 | 5 | 4 | 0 | 0 | 0 | 0 |
| 1 | 1 | 5 | 4 | 0 | 0 | 0 | 0 |
| 1 | 1 | 5 | 4 | 0 | 0 | 0 | 0 |
| 1 | 2 | 5 | 4 | 0 | 0 | 0 | 0 |
| 1 | 1 | 5 | 4 | 0 | 0 | 0 | 0 |
| 1 | 1 | 5 | 4 | 0 | 0 | 0 | 0 |
| 1 | 1 | 5 | 4 | 0 | 0 | 0 | 0 |
| 1 | 1 | 5 | 4 | 0 | 0 | 0 | 0 |
| 1 | 1 | 5 | 4 | 0 | 0 | 0 | 0 |
| 1 | 1 | 5 | 4 | 0 | 0 | 0 | 0 |
| 1 | 1 | 5 | 4 | 0 | 0 | 0 | 0 |
| 1 | 2 | 5 | 4 | 0 | 0 | 0 | 0 |
| 1 | 2 | 5 | 4 | 0 | 0 | 0 | 0 |
| 1 | 1 | 5 | 4 | 0 | 0 | 0 | 0 |
| 1 | 1 | 5 | 4 | 0 | 0 | 0 | 0 |
| 1 | 2 | 5 | 4 | 0 | 0 | 0 | 0 |
| 1 | 1 | 4 | 4 | 0 | 0 | 0 | 0 |
| 1 | 2 | 5 | 3 | 0 | 0 | 0 | 0 |
| 1 | 1 | 5 | 4 | 0 | 0 | 0 | 0 |
| 1 | 2 | 3 | 4 | 0 | 0 | 0 | 0 |
| 1 | 1 | 5 | 4 | 0 | 0 | 0 | 0 |
| 1 | 1 | 5 | 4 | 0 | 0 | 0 | 0 |
| 1 | 1 | 5 | 4 | 0 | 0 | 0 | 0 |
| 1 | 1 | 5 | 4 | 0 | 0 | 0 | 0 |
| 1 | 1 | 5 | 4 | 0 | 0 | 0 | 0 |
| 1 | 1 | 5 | 4 | 0 | 0 | 0 | 0 |
| 1 | 1 | 5 | 4 | 0 | 0 | 0 | 0 |
| 1 | 1 | 5 | 4 | 0 | 0 | 0 | 0 |
| 1 | 1 | 5 | 4 | 0 | 0 | 0 | 0 |
| 1 | 1 | 5 | 4 | 0 | 0 | 0 | 0 |
| 1 | 1 | 5 | 4 | 0 | 0 | 0 | 0 |
| 1 | 1 | 5 | 4 | 0 | 0 | 0 | 0 |
| 1 | 1 | 5 | 4 | 0 | 0 | 0 | 0 |
| 1 | 1 | 5 | 4 | 0 | 0 | 0 | 0 |
| 1 | 2 | 3 | 4 | 0 | 0 | 0 | 0 |
| 1 | 1 | 5 | 4 | 0 | 0 | 0 | 0 |
| 1 | 1 | 5 | 4 | 0 | 0 | 0 | 0 |
| 1 | 1 | 5 | 4 | 0 | 0 | 0 | 0 |
| 1 | 2 | 5 | 4 | 0 | 0 | 0 | 0 |







|   |   |   |   |   |   |   |   |
|---|---|---|---|---|---|---|---|
| 1 | 1 | 5 | 4 | 0 | 0 | 0 | 0 |
| 1 | 1 | 5 | 4 | 0 | 0 | 0 | 0 |
| 1 | 1 | 5 | 4 | 0 | 0 | 0 | 0 |
| 1 | 1 | 5 | 4 | 0 | 0 | 0 | 0 |
| 1 | 1 | 5 | 4 | 0 | 0 | 0 | 0 |
| 1 | 1 | 5 | 4 | 0 | 0 | 0 | 0 |
| 1 | 1 | 5 | 4 | 0 | 0 | 0 | 0 |
| 1 | 1 | 5 | 4 | 0 | 0 | 0 | 0 |
| 1 | 1 | 5 | 4 | 0 | 0 | 0 | 0 |
| 1 | 1 | 5 | 4 | 0 | 0 | 0 | 0 |
| 1 | 1 | 5 | 4 | 0 | 0 | 0 | 0 |
| 1 | 1 | 5 | 4 | 0 | 0 | 0 | 0 |
| 1 | 1 | 5 | 4 | 0 | 0 | 0 | 0 |
| 1 | 1 | 5 | 4 | 0 | 0 | 0 | 0 |
| 1 | 1 | 5 | 4 | 0 | 0 | 0 | 0 |
| 1 | 1 | 5 | 4 | 0 | 0 | 0 | 0 |
| 1 | 1 | 5 | 4 | 0 | 0 | 0 | 0 |
| 1 | 1 | 5 | 4 | 0 | 0 | 0 | 0 |
| 1 | 1 | 5 | 4 | 0 | 0 | 0 | 0 |
| 1 | 1 | 5 | 4 | 0 | 0 | 0 | 0 |
| 1 | 1 | 5 | 4 | 0 | 0 | 0 | 0 |
| 1 | 1 | 6 | 5 | 0 | 0 | 0 | 0 |
| 1 | 1 | 5 | 4 | 0 | 0 | 0 | 0 |
| 1 | 1 | 5 | 4 | 0 | 0 | 0 | 0 |
| 1 | 1 | 5 | 4 | 0 | 0 | 0 | 0 |
| 1 | 1 | 5 | 4 | 0 | 0 | 0 | 0 |
| 1 | 1 | 5 | 4 | 0 | 0 | 0 | 0 |
| 1 | 1 | 5 | 4 | 0 | 0 | 0 | 0 |
| 1 | 1 | 5 | 4 | 0 | 0 | 0 | 0 |
| 1 | 1 | 5 | 5 | 0 | 0 | 0 | 0 |
| 1 | 1 | 5 | 4 | 0 | 0 | 0 | 0 |
| 1 | 1 | 5 | 4 | 0 | 0 | 0 | 0 |
| 1 | 1 | 5 | 5 | 0 | 0 | 0 | 0 |
| 1 | 1 | 5 | 4 | 0 | 0 | 0 | 0 |
| 1 | 1 | 5 | 4 | 0 | 0 | 0 | 0 |
| 1 | 1 | 5 | 4 | 0 | 0 | 0 | 0 |
| 1 | 1 | 5 | 4 | 0 | 0 | 0 | 0 |
| 1 | 1 | 5 | 4 | 0 | 0 | 0 | 0 |
| 1 | 1 | 5 | 4 | 0 | 0 | 0 | 0 |
| 1 | 1 | 5 | 4 | 0 | 0 | 0 | 0 |
| 1 | 1 | 5 | 4 | 0 | 0 | 0 | 0 |
| 1 | 1 | 5 | 4 | 0 | 0 | 0 | 0 |
| 1 | 1 | 5 | 4 | 0 | 0 | 0 | 0 |
| 1 | 1 | 5 | 4 | 0 | 0 | 0 | 0 |
| 1 | 1 | 5 | 5 | 0 | 0 | 0 | 0 |
| 1 | 1 | 5 | 4 | 0 | 0 | 0 | 0 |
| 1 | 1 | 5 | 4 | 0 | 0 | 0 | 0 |
| 1 | 1 | 5 | 4 | 0 | 0 | 0 | 0 |

|   |   |   |   |   |   |   |   |
|---|---|---|---|---|---|---|---|
| 1 | 1 | 5 | 4 | 0 | 0 | 0 | 0 |
| 1 | 1 | 5 | 4 | 0 | 0 | 0 | 0 |
| 1 | 1 | 5 | 4 | 0 | 0 | 0 | 0 |
| 1 | 1 | 5 | 5 | 0 | 0 | 0 | 0 |
| 1 | 1 | 5 | 4 | 0 | 0 | 0 | 0 |
| 1 | 1 | 5 | 4 | 0 | 0 | 0 | 0 |
| 1 | 1 | 5 | 4 | 0 | 0 | 0 | 0 |
| 1 | 1 | 1 | 1 | 0 | 0 | 0 | 0 |
| 1 | 1 | 5 | 4 | 0 | 0 | 0 | 0 |
| 1 | 1 | 5 | 4 | 0 | 0 | 0 | 0 |
| 1 | 1 | 5 | 4 | 0 | 0 | 0 | 0 |
| 1 | 1 | 5 | 4 | 0 | 0 | 0 | 0 |
| 1 | 1 | 4 | 5 | 0 | 0 | 0 | 0 |
| 1 | 1 | 5 | 5 | 0 | 0 | 0 | 0 |
| 1 | 1 | 5 | 4 | 0 | 0 | 0 | 0 |
| 1 | 1 | 5 | 4 | 0 | 0 | 0 | 0 |
| 1 | 1 | 5 | 4 | 0 | 0 | 0 | 0 |
| 1 | 1 | 5 | 4 | 0 | 0 | 0 | 0 |
| 1 | 1 | 5 | 4 | 0 | 0 | 0 | 0 |
| 1 | 1 | 5 | 4 | 0 | 0 | 0 | 0 |
| 1 | 1 | 5 | 4 | 0 | 0 | 0 | 0 |
| 1 | 1 | 5 | 4 | 0 | 0 | 0 | 0 |
| 1 | 1 | 5 | 4 | 0 | 0 | 0 | 0 |
| 1 | 1 | 5 | 4 | 0 | 0 | 0 | 0 |
| 1 | 1 | 5 | 4 | 0 | 0 | 0 | 0 |
| 1 | 1 | 5 | 4 | 0 | 0 | 0 | 0 |
| 1 | 1 | 5 | 4 | 0 | 0 | 0 | 0 |
| 1 | 2 | 4 | 4 | 0 | 0 | 0 | 0 |
| 1 | 2 | 4 | 3 | 0 | 0 | 0 | 0 |
| 1 | 2 | 5 | 4 | 0 | 0 | 0 | 0 |
| 1 | 1 | 5 | 4 | 0 | 0 | 0 | 0 |
| 1 | 1 | 5 | 4 | 0 | 0 | 0 | 0 |
| 1 | 1 | 5 | 4 | 0 | 0 | 0 | 0 |
| 1 | 1 | 5 | 4 | 0 | 0 | 0 | 0 |
| 1 | 1 | 5 | 4 | 0 | 0 | 0 | 0 |
| 1 | 2 | 5 | 4 | 0 | 0 | 0 | 0 |
| 1 | 1 | 5 | 4 | 0 | 0 | 0 | 0 |
| 2 | 2 | 5 | 4 | 0 | 0 | 0 | 0 |
| 1 | 1 | 5 | 1 | 0 | 0 | 0 | 0 |
| 1 | 1 | 5 | 4 | 0 | 0 | 0 | 0 |
| 1 | 1 | 5 | 4 | 0 | 0 | 0 | 0 |
| 1 | 1 | 5 | 4 | 0 | 0 | 0 | 0 |
| 1 | 1 | 5 | 4 | 0 | 0 | 0 | 0 |
| 1 | 2 | 5 | 4 | 0 | 0 | 0 | 0 |
| 1 | 2 | 5 | 4 | 0 | 0 | 0 | 0 |
| 1 | 1 | 5 | 4 | 0 | 0 | 0 | 0 |
| 1 | 1 | 5 | 4 | 0 | 0 | 0 | 0 |
| 1 | 1 | 5 | 4 | 0 | 0 | 0 | 0 |
| 1 | 2 | 5 | 4 | 0 | 0 | 0 | 0 |
| 1 | 2 | 5 | 4 | 0 | 0 | 0 | 0 |
| 1 | 1 | 5 | 4 | 0 | 0 | 0 | 0 |
| 1 | 1 | 5 | 4 | 0 | 0 | 0 | 0 |
| 1 | 1 | 5 | 4 | 0 | 0 | 0 | 0 |
| 1 | 1 | 5 | 4 | 0 | 0 | 0 | 0 |

|   |   |   |   |   |   |   |   |
|---|---|---|---|---|---|---|---|
| 1 | 1 | 5 | 4 | 0 | 0 | 0 | 0 |
| 1 | 1 | 5 | 4 | 0 | 0 | 0 | 0 |
| 1 | 1 | 5 | 4 | 0 | 0 | 0 | 0 |
| 1 | 2 | 5 | 4 | 0 | 0 | 0 | 0 |
| 1 | 1 | 5 | 4 | 0 | 0 | 0 | 0 |
| 1 | 1 | 5 | 4 | 0 | 0 | 0 | 0 |
| 1 | 1 | 5 | 4 | 0 | 0 | 0 | 0 |
| 1 | 2 | 5 | 4 | 0 | 0 | 0 | 0 |
| 1 | 2 | 5 | 4 | 0 | 0 | 0 | 0 |
| 1 | 2 | 5 | 4 | 0 | 0 | 0 | 0 |
| 1 | 1 | 5 | 4 | 0 | 0 | 0 | 0 |
| 1 | 1 | 5 | 4 | 0 | 0 | 0 | 0 |
| 1 | 1 | 4 | 4 | 0 | 0 | 0 | 0 |
| 1 | 1 | 5 | 4 | 0 | 0 | 0 | 0 |





























| J10Doyou     | J11Howoft | J12Howlon    | J13Ifyesiny | J14Whatro  | J15Inyourv    | K1Haveyou | K2Yesterda | K3Howmar |
|--------------|-----------|--------------|-------------|------------|---------------|-----------|------------|----------|
| 1. Yes       |           | 1 3. one mon | did not r   | Does not e | Supply or a   | 1         | 1          | 2        |
|              | #NULL!    |              |             |            |               | 1         | 1          | 3        |
| 2. No        |           | 2. 1-2 weeks |             |            |               | 1         | 1          | 1        |
|              | #NULL!    |              |             |            |               | 1         | 1          | 2        |
| 1. Yes       |           | 4            | health wor  | late repor | early repor   | 2         | 2          | #NULL!   |
|              | #NULL!    |              |             |            |               | 1         | 1          | 2        |
|              | #NULL!    |              |             |            |               | 1         | 1          | 1        |
| 2. No        |           |              |             |            |               | 1         | 2          | 2        |
|              | #NULL!    |              |             |            |               | 2         | 2          | #NULL!   |
| is according |           |              |             |            |               | 1         | 1          | 3        |
|              | #NULL!    |              |             |            |               | 2         | 2          | #NULL!   |
|              | #NULL!    |              |             |            |               | 2         | 2          | #NULL!   |
| 1. Yes       |           | 3 4. More th | delay in re | do not act | notify all re | 2         | 2          | #NULL!   |
|              | #NULL!    |              |             |            |               | 1         | 1          | 1        |
|              | #NULL!    |              |             |            |               | 2         | 2          | #NULL!   |
|              | #NULL!    |              |             |            |               | 2         | 2          | #NULL!   |
|              | #NULL!    |              |             |            |               | 1         | 1          | 2        |
|              | #NULL!    |              |             |            |               | 1         | 1          | 2        |
|              | #NULL!    |              |             |            |               | 2         | 2          | #NULL!   |
|              | #NULL!    |              |             |            |               | 2         | 2          | #NULL!   |
|              | #NULL!    |              |             |            |               | 2         | 2          | #NULL!   |
|              | #NULL!    |              |             |            |               | 1         | 1          | 4        |
|              | #NULL!    |              |             |            |               | 1         | 1          | 4        |
|              | #NULL!    |              |             |            |               | 1         | 1          | 3        |
|              | #NULL!    |              |             |            |               | 1         | 1          | 1        |
|              | #NULL!    |              |             |            |               | 1         | 1          | 2        |
|              | #NULL!    |              |             |            |               | 2         | 2          | #NULL!   |
|              | #NULL!    |              |             |            |               | 1         | 1          | 3        |
|              | #NULL!    |              |             |            |               | 1         | 1          | 4        |
|              | #NULL!    |              |             |            |               | 1         | 1          | 3        |
|              | #NULL!    |              |             |            |               | 1         | 1          | 3        |
|              | #NULL!    |              |             |            |               | 1         | 1          | 3        |
|              | #NULL!    |              |             |            |               | 1         | 1          | 3        |
|              | #NULL!    |              |             |            |               | 1         | 1          | 2        |
|              | #NULL!    |              |             |            |               | 1         | 1          | 3        |
|              | #NULL!    |              |             |            |               | 1         | 1          | 2        |
|              | #NULL!    |              |             |            |               | 1         | 1          | 2        |
|              | #NULL!    |              |             |            |               | 1         | 1          | 4        |
|              | #NULL!    |              |             |            |               | 1         | 1          | 1        |
|              | #NULL!    |              |             |            |               | 1         | 1          | 3        |
|              | #NULL!    |              |             |            |               | 1         | 1          | 3        |
|              | #NULL!    |              |             |            |               | 1         | 1          | 3        |
|              | #NULL!    |              |             |            |               | 1         | 1          | 3        |
|              | #NULL!    |              |             |            |               | 1         | 1          | 2        |
|              | #NULL!    |              |             |            |               | 1         | 1          | 3        |
|              | #NULL!    |              |             |            |               | 1         | 1          | 2        |
|              | #NULL!    |              |             |            |               | 1         | 1          | 4        |
|              | #NULL!    |              |             |            |               | 1         | 1          | 1        |
|              | #NULL!    |              |             |            |               | 1         | 1          | 3        |
|              | #NULL!    |              |             |            |               | 1         | 1          | 3        |
|              | #NULL!    |              |             |            |               | 1         | 1          | 3        |
|              | #NULL!    |              |             |            |               | 1         | 1          | 2        |

|        |                                                |   |   |        |
|--------|------------------------------------------------|---|---|--------|
| #NULL! |                                                | 1 | 1 | 3      |
| #NULL! |                                                | 1 | 1 | 2      |
| #NULL! |                                                | 2 | 2 | #NULL! |
| #NULL! |                                                | 1 | 1 | 3      |
| #NULL! |                                                | 1 | 1 | 1      |
| #NULL! |                                                | 2 | 2 | #NULL! |
| #NULL! |                                                | 1 | 1 | 3      |
| #NULL! |                                                | 1 | 1 | 3      |
| #NULL! |                                                | 1 | 1 | 3      |
| #NULL! |                                                | 1 | 1 | 3      |
| #NULL! |                                                | 1 | 1 | 3      |
| #NULL! |                                                | 1 | 1 | 1      |
| #NULL! |                                                | 2 | 2 | #NULL! |
| #NULL! |                                                | 1 | 1 | 3      |
| #NULL! |                                                | 1 | 1 | 3      |
| #NULL! |                                                | 1 | 1 | 3      |
| #NULL! |                                                | 2 | 2 | #NULL! |
| #NULL! |                                                | 1 | 1 | 3      |
| #NULL! |                                                | 1 | 1 | 3      |
| #NULL! |                                                | 1 | 1 | 4      |
| 1. Yes | 2 4. More than 1 month they dont s the contrac | 2 | 2 | #NULL! |
| #NULL! |                                                | 1 | 1 | 2      |
| #NULL! |                                                | 1 | 1 | 3      |
| #NULL! |                                                | 1 | 1 | 4      |
| #NULL! |                                                | 1 | 1 | 3      |
| #NULL! |                                                | 1 | 1 | 3      |
| #NULL! |                                                | 1 | 1 | 1      |
| #NULL! |                                                | 1 | 1 | 2      |
| #NULL! |                                                | 2 | 2 | #NULL! |
| #NULL! |                                                | 1 | 1 | 2      |
| #NULL! |                                                | 1 | 2 | 4      |
| #NULL! |                                                | 1 | 1 | 2      |
| #NULL! |                                                | 1 | 1 | 3      |
| #NULL! |                                                | 1 | 1 | 3      |
| #NULL! |                                                | 1 | 1 | 4      |
| #NULL! |                                                | 1 | 1 | 3      |
| #NULL! |                                                | 1 | 1 | 4      |
| #NULL! |                                                | 1 | 1 | 3      |
| #NULL! |                                                | 1 | 1 | 2      |
| #NULL! |                                                | 1 | 1 | 2      |
| #NULL! |                                                | 1 | 1 | 3      |
| #NULL! |                                                | 1 | 1 | 1      |
| #NULL! |                                                | 2 | 2 | #NULL! |
| #NULL! |                                                | 1 | 1 | 1      |
| #NULL! |                                                | 1 | 1 | 1      |
| #NULL! |                                                | 1 | 1 | 3      |
| #NULL! |                                                | 1 | 1 | 3      |

|        |   |   |        |
|--------|---|---|--------|
| #NULL! | 1 | 1 | 3      |
| #NULL! | 1 | 1 | 2      |
| #NULL! | 2 | 2 | #NULL! |
| #NULL! | 2 | 2 | #NULL! |
| #NULL! | 1 | 1 | 4      |
| #NULL! | 1 | 2 | 3      |
| #NULL! | 1 | 1 | 3      |
| #NULL! | 2 | 1 | #NULL! |
| #NULL! | 1 | 1 | 3      |
| #NULL! | 1 | 1 | 4      |
| #NULL! | 1 | 1 | 2      |
| #NULL! | 1 | 1 | 4      |
| #NULL! | 1 | 1 | 3      |
| #NULL! | 1 | 1 | 3      |
| #NULL! | 1 | 1 | 4      |
| #NULL! | 1 | 2 | 3      |
| #NULL! | 2 | 2 | #NULL! |
| #NULL! | 1 | 2 | 3      |
| #NULL! | 1 | 1 | 3      |
| #NULL! | 1 | 2 | 3      |
| #NULL! | 1 | 1 | 3      |
| #NULL! | 1 | 1 | 3      |
| #NULL! | 1 | 2 | 3      |
| #NULL! | 1 | 1 | 1      |
| #NULL! | 1 | 1 | 4      |
| #NULL! | 2 | 2 | #NULL! |
| #NULL! | 2 | 2 | #NULL! |
| #NULL! | 1 | 1 | 3      |
| #NULL! | 1 | 2 | 1      |
| #NULL! | 1 | 1 | 3      |
| #NULL! | 1 | 1 | 1      |
| #NULL! | 2 | 2 | #NULL! |
| #NULL! | 2 | 2 | #NULL! |
| #NULL! | 2 | 2 | #NULL! |
| #NULL! | 1 | 1 | 3      |
| #NULL! | 1 | 1 | 2      |
| #NULL! | 2 | 2 | #NULL! |
| #NULL! | 1 | 1 | 3      |
| #NULL! | 1 | 1 | 4      |
| #NULL! | 1 | 1 | 3      |
| #NULL! | 1 | 1 | 3      |
| #NULL! | 1 | 1 | 3      |
| #NULL! | 1 | 1 | 3      |
| #NULL! | 2 | 2 | #NULL! |
| #NULL! | 1 | 1 | 2      |
| #NULL! | 1 | 1 | 2      |
| #NULL! | 1 | 1 | 3      |
| #NULL! | 1 | 2 | 4      |

|        |   |   |        |
|--------|---|---|--------|
| #NULL! | 1 | 2 | 4      |
| #NULL! | 1 | 1 | 4      |
| #NULL! | 1 | 1 | 4      |
| #NULL! | 2 | 2 | #NULL! |
| #NULL! | 2 | 2 | #NULL! |
| #NULL! | 1 | 1 | 3      |
| #NULL! | 2 | 2 | #NULL! |
| #NULL! | 1 | 1 | 2      |
| #NULL! | 1 | 1 | 1      |
| #NULL! | 1 | 1 | 2      |
| #NULL! | 1 | 2 | 2      |
| #NULL! | 2 | 2 | #NULL! |
| #NULL! | 1 | 1 | 3      |
| #NULL! | 1 | 1 | 3      |
| #NULL! | 1 | 1 | 3      |
| #NULL! | 1 | 1 | 3      |
| #NULL! | 1 | 1 | 2      |
| #NULL! | 1 | 1 | 4      |
| #NULL! | 1 | 1 | 4      |
| #NULL! | 1 | 1 | 1      |
| #NULL! | 1 | 1 | 4      |
| #NULL! | 1 | 2 | 4      |
| #NULL! | 1 | 1 | 3      |
| #NULL! | 1 | 1 | 3      |
| #NULL! | 1 | 1 | 3      |
| #NULL! | 1 | 1 | 2      |
| #NULL! | 1 | 1 | 3      |
| #NULL! | 1 | 1 | 3      |
| #NULL! | 1 | 1 | 2      |
| #NULL! | 1 | 1 | 2      |
| #NULL! | 1 | 1 | 3      |
| #NULL! | 1 | 2 | 3      |
| #NULL! | 1 | 1 | 3      |
| #NULL! | 1 | 1 | 3      |
| #NULL! | 1 | 1 | 3      |
| #NULL! | 2 | 2 | #NULL! |
| #NULL! | 1 | 2 | 3      |
| #NULL! | 1 | 1 | 3      |
| #NULL! | 1 | 1 | 4      |
| #NULL! | 1 | 1 | 3      |
| #NULL! | 1 | 1 | 3      |
| #NULL! | 1 | 1 | 2      |
| #NULL! | 1 | 1 | 2      |
| #NULL! | 1 | 1 | 2      |
| #NULL! | 1 | 1 | 2      |
| #NULL! | 1 | 1 | 2      |
| #NULL! | 1 | 1 | 2      |
| #NULL! | 1 | 1 | 2      |
| #NULL! | 1 | 1 | 3      |
| #NULL! | 1 | 1 | 4      |



|        |                     |   |   |        |
|--------|---------------------|---|---|--------|
| #NULL! |                     | 1 | 1 | 3      |
| #NULL! |                     | 1 | 1 | 4      |
| #NULL! |                     | 1 | 1 | 3      |
| #NULL! |                     | 1 | 1 | 3      |
| #NULL! |                     | 1 | 1 | 2      |
| #NULL! |                     | 1 | 1 | 4      |
| #NULL! |                     | 1 | 1 | 3      |
| #NULL! |                     | 1 | 1 | 3      |
| #NULL! |                     | 1 | 2 | 4      |
| #NULL! |                     | 1 | 1 | 3      |
| #NULL! |                     | 1 | 1 | 3      |
| #NULL! |                     | 1 | 1 | 3      |
| #NULL! |                     | 1 | 1 | 3      |
| #NULL! |                     | 1 | 1 | 3      |
| #NULL! |                     | 1 | 1 | 4      |
| #NULL! |                     | 1 | 1 | 3      |
| #NULL! |                     | 1 | 1 | 3      |
| #NULL! |                     | 1 | 1 | 4      |
| #NULL! |                     | 1 | 1 | 3      |
| #NULL! |                     | 2 | 2 | #NULL! |
| #NULL! |                     | 2 | 2 | #NULL! |
| #NULL! |                     | 1 | 1 | 3      |
| #NULL! |                     | 1 | 1 | 3      |
| #NULL! |                     | 1 | 1 | 3      |
| #NULL! |                     | 1 | 1 | 3      |
| #NULL! |                     | 1 | 2 | 3      |
| #NULL! |                     | 1 | 1 | 3      |
| #NULL! |                     | 1 | 1 | 2      |
| #NULL! |                     | 2 | 2 | #NULL! |
| #NULL! |                     | 2 | 2 | #NULL! |
| #NULL! |                     | 1 | 1 | 4      |
| #NULL! |                     | 1 | 1 | 3      |
| #NULL! |                     | 1 | 1 | 3      |
| #NULL! |                     | 2 | 2 | #NULL! |
| #NULL! |                     | 2 | 2 | #NULL! |
| #NULL! |                     | 1 | 2 | 3      |
| #NULL! |                     | 1 | 1 | 3      |
| #NULL! |                     | 2 | 2 | #NULL! |
| #NULL! | 1. Less than a week | 2 | 2 | #NULL! |
| #NULL! |                     | 1 | 1 | 3      |
| #NULL! |                     | 1 | 1 | 3      |
| #NULL! |                     | 1 | 1 | 3      |
| #NULL! |                     | 1 | 1 | 3      |
| #NULL! |                     | 1 | 1 | 4      |
| #NULL! |                     | 1 | 1 | 4      |
| #NULL! |                     | 1 | 1 | 3      |
| #NULL! |                     | 1 | 1 | 3      |
| #NULL! |                     | 2 | 2 | #NULL! |
| #NULL! |                     | 1 | 2 | 3      |



|        |        |                                                 |   |   |        |
|--------|--------|-------------------------------------------------|---|---|--------|
|        | #NULL! |                                                 | 2 | 2 | #NULL! |
|        | #NULL! |                                                 | 1 | 2 | 3      |
| 1. Yes | #NULL! | The shorta; Government Free supply              | 2 | 2 | #NULL! |
|        | #NULL! |                                                 | 1 | 1 | 3      |
|        | #NULL! |                                                 | 1 | 1 | 2      |
|        | #NULL! |                                                 | 1 | 1 | 3      |
|        | #NULL! |                                                 | 1 | 1 | 3      |
|        | #NULL! |                                                 | 2 | 2 | #NULL! |
|        | #NULL! |                                                 | 1 | 1 | 4      |
|        | #NULL! |                                                 | 2 | 2 | #NULL! |
|        | #NULL! |                                                 | 1 | 1 | 4      |
| 1. Yes | #NULL! | 3. one mon Inadequate Delay in su  Requistion i | 1 | 1 | 3      |
|        | #NULL! |                                                 | 1 | 1 | 2      |
|        | #NULL! |                                                 | 1 | 1 | 3      |
|        | #NULL! |                                                 | 1 | 1 | 3      |
|        | #NULL! |                                                 | 2 | 2 | #NULL! |
|        | #NULL! |                                                 | 2 | 2 | #NULL! |
|        | #NULL! |                                                 | 1 | 1 | 2      |
|        | #NULL! |                                                 | 1 | 1 | 1      |
|        | #NULL! |                                                 | 1 | 1 | 3      |
|        | #NULL! |                                                 | 1 | 1 | 3      |
|        | #NULL! |                                                 | 1 | 2 | 4      |
|        | #NULL! |                                                 | 2 | 2 | #NULL! |
|        | #NULL! |                                                 | 1 | 2 | 4      |
|        | #NULL! |                                                 | 1 | 1 | 3      |
|        | #NULL! |                                                 | 1 | 1 | 3      |
|        | #NULL! |                                                 | 2 | 2 | #NULL! |
|        | #NULL! |                                                 | 1 | 1 | 4      |
|        | #NULL! |                                                 | 2 | 2 | #NULL! |
|        | #NULL! |                                                 | 1 | 2 | 4      |
|        | #NULL! |                                                 | 1 | 1 | 4      |
|        | #NULL! |                                                 | 1 | 1 | 4      |
|        | #NULL! |                                                 | 1 | 1 | 3      |
|        | #NULL! |                                                 | 1 | 1 | 2      |
|        | #NULL! |                                                 | 1 | 1 | 3      |
|        | #NULL! |                                                 | 1 | 1 | 3      |
|        | #NULL! |                                                 | 1 | 1 | 3      |
|        | #NULL! |                                                 | 1 | 1 | 3      |
|        | #NULL! |                                                 | 1 | 1 | 3      |
|        | #NULL! |                                                 | 1 | 1 | 3      |
|        | #NULL! |                                                 | 1 | 1 | 2      |
|        | #NULL! |                                                 | 2 | 2 | #NULL! |
|        | #NULL! |                                                 | 1 | 1 | 1      |
| 1. Yes | #NULL! |                                                 | 1 | 1 | 4      |
|        | #NULL! |                                                 | 1 | 1 | 3      |
|        | #NULL! |                                                 | 2 | 2 | #NULL! |
|        | #NULL! |                                                 | 1 | 1 | 3      |

|                                                |   |   |        |
|------------------------------------------------|---|---|--------|
| #NULL!                                         | 1 | 1 | 4      |
| #NULL!                                         | 1 | 2 | 2      |
| #NULL!                                         | 1 | 2 | 2      |
| #NULL!                                         | 1 | 1 | 1      |
| #NULL!                                         | 1 | 1 | 3      |
| #NULL!                                         | 1 | 1 | 2      |
| #NULL!                                         | 1 | 1 | 1      |
| #NULL!                                         | 1 | 2 | #NULL! |
| #NULL!                                         | 1 | 1 | 1      |
| #NULL!                                         | 1 | 1 | 1      |
| #NULL!                                         | 1 | 1 | 2      |
| #NULL!                                         | 2 | 2 | #NULL! |
| #NULL!                                         | 1 | 1 | 3      |
| #NULL!                                         | 1 | 1 | 3      |
| #NULL!                                         | 1 | 1 | 3      |
| #NULL!                                         | 1 | 1 | 3      |
| #NULL!                                         | 2 | 2 | #NULL! |
| #NULL!                                         | 1 | 2 | 4      |
| #NULL!                                         | 1 | 1 | 4      |
| #NULL!                                         | 1 | 1 | 3      |
| #NULL!                                         | 1 | 1 | 3      |
| #NULL!                                         | 1 | 1 | 4      |
| #NULL!                                         | 1 | 1 | 4      |
| #NULL!                                         | 2 | 2 | #NULL! |
| #NULL!                                         | 1 | 2 | 4      |
| #NULL!                                         | 1 | 1 | 3      |
| #NULL!                                         | 2 | 2 | #NULL! |
| #NULL!                                         | 2 | 2 | #NULL! |
| #NULL!                                         | 2 | 2 | #NULL! |
| #NULL!                                         | 1 | 2 | 4      |
| #NULL!                                         | 1 | 1 | 4      |
| #NULL!                                         | 1 | 1 | 4      |
| #NULL!                                         | 1 | 1 | 3      |
| #NULL!                                         | 2 | 2 | #NULL! |
| #NULL!                                         | 2 | 2 | #NULL! |
| #NULL!                                         | 1 | 1 | 4      |
| #NULL!                                         | 2 | 2 | #NULL! |
| #NULL!                                         | 2 | 2 | #NULL! |
| #NULL!                                         | 1 | 2 | 4      |
| #NULL!                                         | 2 | 2 | #NULL! |
| #NULL!                                         | 2 | 2 | #NULL! |
| 1. Yes                                         | 1 | 1 | 3      |
| 1 3. one mor Mostly use can not exç Timely pay | 1 | 1 | 3      |
| #NULL!                                         | 1 | 1 | 3      |
| #NULL!                                         | 1 | 1 | 2      |
| #NULL!                                         | 1 | 1 | 3      |
| #NULL!                                         | 2 | 2 | #NULL! |
| #NULL!                                         | 1 | 1 | 4      |
| #NULL!                                         | 1 | 1 | 4      |

|        |   |   |        |
|--------|---|---|--------|
| #NULL! | 1 | 1 | 3      |
| #NULL! | 1 | 1 | 4      |
| #NULL! | 1 | 1 | 3      |
| #NULL! | 1 | 1 | 3      |
| #NULL! | 2 | 2 | #NULL! |
| #NULL! | 1 | 1 | 4      |
| #NULL! | 1 | 1 | 3      |
| #NULL! | 1 | 1 | 4      |
| #NULL! | 1 | 1 | 3      |
| #NULL! | 2 | 2 | #NULL! |
| #NULL! | 1 | 2 | 1      |
| #NULL! | 2 | 2 | #NULL! |
| #NULL! | 1 | 1 | 3      |
| #NULL! | 1 | 1 | 3      |
| #NULL! | 2 | 2 | #NULL! |
| #NULL! | 1 | 1 | 3      |
| #NULL! | 1 | 1 | 3      |
| #NULL! | 1 | 1 | 3      |
| #NULL! | 1 | 1 | 3      |
| #NULL! | 2 | 2 | #NULL! |
| #NULL! | 1 | 1 | 3      |
| #NULL! | 1 | 1 | 3      |
| #NULL! | 1 | 2 | 3      |
| #NULL! | 2 | 2 | #NULL! |
| #NULL! | 1 | 1 | 3      |
| #NULL! | 1 | 2 | 3      |
| #NULL! | 1 | 1 | 3      |
| #NULL! | 2 | 2 | #NULL! |
| #NULL! | 2 | 2 | #NULL! |
| #NULL! | 1 | 1 | 3      |
| #NULL! | 1 | 1 | 3      |
| #NULL! | 1 | 1 | 3      |
| #NULL! | 2 | 2 | #NULL! |
| #NULL! | 1 | 2 | 3      |
| #NULL! | 1 | 2 | 1      |
| #NULL! | 2 | 2 | #NULL! |
| #NULL! | 1 | 1 | 2      |
| #NULL! | 2 | 2 | #NULL! |
| #NULL! | 2 | 2 | #NULL! |
| #NULL! | 2 | 2 | #NULL! |
| #NULL! | 1 | 1 | 3      |
| #NULL! | 1 | 1 | 3      |
| #NULL! | 1 | 1 | 3      |
| #NULL! | 1 | 1 | 3      |
| #NULL! | 1 | 1 | 4      |
| #NULL! | 1 | 2 | 3      |
| #NULL! | 1 | 1 | 3      |

|        |   |   |        |
|--------|---|---|--------|
| #NULL! | 1 | 2 | 3      |
| #NULL! | 1 | 1 | 3      |
| #NULL! | 1 | 1 | 2      |
| #NULL! | 1 | 1 | 3      |
| #NULL! | 1 | 1 | 3      |
| #NULL! | 2 | 2 | #NULL! |
| #NULL! | 1 | 1 | 3      |
| #NULL! | 1 | 1 | 4      |
| #NULL! | 1 | 1 | 3      |
| #NULL! | 1 | 1 | 3      |
| #NULL! | 1 | 1 | 4      |
| #NULL! | 1 | 1 | 3      |
| #NULL! | 1 | 1 | 3      |
| #NULL! | 1 | 1 | 3      |
| #NULL! | 2 | 2 | #NULL! |
| #NULL! | 1 | 1 | 4      |
| #NULL! | 2 | 2 | #NULL! |
| #NULL! | 1 | 1 | 3      |
| #NULL! | 2 | 2 | #NULL! |
| #NULL! | 2 | 2 | #NULL! |
| #NULL! | 1 | 1 | 3      |
| #NULL! | 1 | 1 | 4      |
| #NULL! | 1 | 1 | 3      |
| #NULL! | 2 | 2 | #NULL! |
| #NULL! | 2 | 2 | #NULL! |
| #NULL! | 2 | 2 | #NULL! |
| #NULL! | 1 | 1 | 3      |
| #NULL! | 2 | 2 | #NULL! |
| #NULL! | 1 | 1 | 3      |
| #NULL! | 2 | 2 | #NULL! |
| #NULL! | 1 | 1 | 3      |
| #NULL! | 1 | 1 | 3      |
| #NULL! | 1 | 1 | 3      |
| #NULL! | 1 | 1 | 3      |
| #NULL! | 1 | 1 | 3      |
| #NULL! | 1 | 1 | 3      |
| #NULL! | 1 | 1 | 3      |
| #NULL! | 1 | 1 | 4      |
| #NULL! | 1 | 1 | 2      |
| #NULL! | 2 | 2 | #NULL! |
| #NULL! | 1 | 1 | 2      |
| #NULL! | 1 | 1 | 2      |
| #NULL! | 1 | 2 | 3      |
| #NULL! | 1 | 1 | 3      |
| #NULL! | 2 | 2 | #NULL! |
| #NULL! | 2 | 2 | #NULL! |
| #NULL! | 1 | 2 | 3      |
| #NULL! | 1 | 1 | 3      |

|        |   |   |        |
|--------|---|---|--------|
| #NULL! | 1 | 1 | 3      |
| #NULL! | 1 | 1 | 3      |
| #NULL! | 1 | 1 | 3      |
| #NULL! | 1 | 1 | 3      |
| #NULL! | 1 | 1 | 3      |
| #NULL! | 1 | 1 | 2      |
| #NULL! | 1 | 1 | 2      |
| #NULL! | 1 | 1 | 3      |
| #NULL! | 1 | 1 | 3      |
| #NULL! | 1 | 1 | 3      |
| #NULL! | 1 | 1 | 4      |
| #NULL! | 1 | 1 | 4      |
| #NULL! | 1 | 1 | 3      |
| #NULL! | 2 | 2 | #NULL! |
| #NULL! | 2 | 2 | #NULL! |
| #NULL! | 1 | 1 | 2      |
| #NULL! | 1 | 1 | 2      |
| #NULL! | 2 | 2 | #NULL! |
| #NULL! | 1 | 1 | 1      |
| #NULL! | 1 | 1 | 3      |
| #NULL! | 2 | 2 | #NULL! |
| #NULL! | 1 | 1 | 2      |
| #NULL! | 1 | 1 | 3      |
| #NULL! | 1 | 1 | 2      |
| #NULL! | 1 | 1 | 3      |
| #NULL! | 1 | 1 | 3      |
| #NULL! | 1 | 1 | 3      |
| #NULL! | 1 | 1 | 3      |
| #NULL! | 1 | 1 | 3      |
| #NULL! | 1 | 1 | 2      |
| #NULL! | 1 | 1 | 4      |
| #NULL! | 1 | 1 | 3      |
| #NULL! | 1 | 1 | 4      |
| #NULL! | 1 | 1 | 4      |
| #NULL! | 2 | 2 | #NULL! |
| #NULL! | 2 | 2 | #NULL! |
| #NULL! | 2 | 2 | #NULL! |
| #NULL! | 1 | 1 | 2      |
| #NULL! | 1 | 1 | 3      |
| #NULL! | 2 | 2 | #NULL! |
| #NULL! | 2 | 2 | #NULL! |
| #NULL! | 2 | 2 | #NULL! |
| #NULL! | 2 | 2 | #NULL! |
| #NULL! | 1 | 1 | 3      |
| #NULL! | 2 | 2 | #NULL! |
| #NULL! | 2 | 2 | #NULL! |
| #NULL! | 1 | 1 | 3      |

|        |   |   |        |
|--------|---|---|--------|
| #NULL! | 2 | 2 | #NULL! |
| #NULL! | 2 | 2 | #NULL! |
| #NULL! | 2 | 2 | #NULL! |
| #NULL! | 2 | 2 | #NULL! |
| #NULL! | 1 | 1 | 3      |
| #NULL! | 1 | 1 | 3      |
| #NULL! | 1 | 1 | 3      |
| #NULL! | 1 | 1 | 3      |
| #NULL! | 2 | 2 | #NULL! |
| #NULL! | 1 | 1 | 1      |
| #NULL! | 2 | 2 | #NULL! |
| #NULL! | 2 | 2 | #NULL! |
| #NULL! | 2 | 2 | #NULL! |
| #NULL! | 2 | 2 | #NULL! |



| Grains | root | Dairy | produ | Flesh | foods | Eggs | Legumes | Vitamin | Ari | Other | fruits | L1 | TYPE | of | H | L2 | TOILET | fa |
|--------|------|-------|-------|-------|-------|------|---------|---------|-----|-------|--------|----|------|----|---|----|--------|----|
| 1      | 0    | 1     | 0     | 1     | 0     | 1    | 0       | 1       | 0   | 0     | 0      | 2  | 5    |    |   |    |        |    |
| 1      | 0    | 1     | 0     | 1     | 0     | 1    | 0       | 1       | 0   | 0     | 0      | 3  | 5    |    |   |    |        |    |
| 1      | 0    | 1     | 0     | 1     | 0     | 1    | 0       | 1       | 0   | 0     | 0      | 2  | 5    |    |   |    |        |    |
| 1      | 0    | 0     | 0     | 0     | 0     | 0    | 0       | 0       | 0   | 0     | 0      | 3  | 5    |    |   |    |        |    |
| 0      | 0    | 0     | 0     | 0     | 0     | 0    | 0       | 0       | 0   | 0     | 0      | 2  | 5    |    |   |    |        |    |
| 1      | 0    | 1     | 0     | 1     | 0     | 1    | 0       | 1       | 1   | 0     | 0      | 1  | 4    |    |   |    |        |    |
| 1      | 0    | 1     | 0     | 1     | 0     | 0    | 0       | 0       | 0   | 0     | 0      | 1  | 1    |    |   |    |        |    |
| 1      | 0    | 0     | 0     | 0     | 0     | 0    | 0       | 0       | 0   | 0     | 0      | 1  | 1    |    |   |    |        |    |
| 0      | 0    | 0     | 0     | 0     | 0     | 0    | 0       | 0       | 0   | 0     | 0      | 3  | 5    |    |   |    |        |    |
| 1      | 1    | 0     | 1     | 0     | 1     | 1    | 0       | 1       | 0   | 0     | 0      | 2  | 5    |    |   |    |        |    |
| 0      | 0    | 0     | 0     | 0     | 0     | 0    | 0       | 0       | 0   | 0     | 0      | 3  | 5    |    |   |    |        |    |
| 0      | 0    | 0     | 0     | 0     | 0     | 0    | 0       | 0       | 0   | 0     | 0      | 2  | 5    |    |   |    |        |    |
| 0      | 0    | 0     | 0     | 0     | 0     | 0    | 0       | 0       | 0   | 0     | 0      | 2  | 5    |    |   |    |        |    |
| 1      | 0    | 0     | 0     | 0     | 0     | 0    | 0       | 0       | 0   | 0     | 0      | 1  | 5    |    |   |    |        |    |
| 0      | 0    | 0     | 0     | 0     | 0     | 0    | 0       | 0       | 0   | 0     | 0      | 3  | 5    |    |   |    |        |    |
| 0      | 0    | 0     | 0     | 0     | 0     | 0    | 0       | 0       | 0   | 0     | 0      | 3  | 5    |    |   |    |        |    |
| 0      | 0    | 1     | 1     | 0     | 1     | 0    | 1       | 0       | 1   | 1     | 1      | 3  | 5    |    |   |    |        |    |
| 1      | 0    | 1     | 0     | 1     | 0     | 0    | 0       | 0       | 0   | 0     | 1      | 1  | 5    |    |   |    |        |    |
| 0      | 0    | 0     | 0     | 0     | 0     | 0    | 0       | 0       | 0   | 0     | 0      | 2  | 5    |    |   |    |        |    |
| 0      | 0    | 0     | 0     | 0     | 0     | 0    | 0       | 0       | 0   | 0     | 0      | 1  | 4    |    |   |    |        |    |
| 0      | 0    | 0     | 0     | 0     | 0     | 0    | 0       | 0       | 0   | 0     | 0      | 2  | 5    |    |   |    |        |    |
| 1      | 1    | 1     | 0     | 1     | 0     | 1    | 0       | 1       | 1   | 0     | 0      | 2  | 5    |    |   |    |        |    |
| 1      | 1    | 1     | 0     | 1     | 0     | 1    | 0       | 1       | 1   | 0     | 0      | 2  | 5    |    |   |    |        |    |
| 1      | 1    | 1     | 0     | 1     | 0     | 1    | 0       | 1       | 1   | 0     | 0      | 1  | 1    |    |   |    |        |    |
| 1      | 0    | 1     | 0     | 1     | 0     | 0    | 0       | 0       | 0   | 0     | 0      | 1  | 5    |    |   |    |        |    |
| 1      | 1    | 0     | 1     | 0     | 1     | 0    | 1       | 0       | 0   | 1     | 1      | 2  | 5    |    |   |    |        |    |
| 0      | 0    | 0     | 0     | 0     | 0     | 0    | 0       | 0       | 0   | 0     | 0      | 3  | 3    |    |   |    |        |    |
| 1      | 0    | 1     | 0     | 1     | 0     | 1    | 0       | 1       | 1   | 0     | 0      | 2  | 5    |    |   |    |        |    |
| 0      | 1    | 1     | 1     | 1     | 1     | 1    | 0       | 1       | 0   | 0     | 0      | 2  | 5    |    |   |    |        |    |
| 1      | 1    | 1     | 0     | 1     | 0     | 1    | 0       | 1       | 1   | 1     | 1      | 1  | 5    |    |   |    |        |    |
| 1      | 0    | 0     | 1     | 0     | 1     | 1    | 1       | 1       | 1   | 0     | 0      | 2  | 5    |    |   |    |        |    |
| 1      | 0    | 1     | 0     | 1     | 0     | 0    | 0       | 1       | 1   | 0     | 0      | 2  | 5    |    |   |    |        |    |
| 1      | 0    | 0     | 0     | 0     | 0     | 0    | 0       | 1       | 1   | 1     | 1      | 1  | 5    |    |   |    |        |    |
| 1      | 0    | 1     | 0     | 1     | 0     | 1    | 0       | 1       | 1   | 0     | 0      | 2  | 5    |    |   |    |        |    |
| 1      | 0    | 1     | 0     | 1     | 0     | 1    | 0       | 1       | 1   | 0     | 0      | 2  | 5    |    |   |    |        |    |
| 1      | 1    | 1     | 0     | 1     | 0     | 1    | 0       | 1       | 0   | 0     | 0      | 2  | 5    |    |   |    |        |    |
| 1      | 0    | 0     | 1     | 0     | 1     | 0    | 0       | 1       | 1   | 1     | 1      | 2  | 5    |    |   |    |        |    |
| 1      | 0    | 1     | 0     | 1     | 0     | 1    | 0       | 1       | 1   | 0     | 0      | 2  | 5    |    |   |    |        |    |
| 1      | 0    | 1     | 0     | 1     | 0     | 1    | 0       | 1       | 1   | 0     | 0      | 2  | 5    |    |   |    |        |    |
| 1      | 0    | 1     | 0     | 1     | 0     | 1    | 0       | 1       | 1   | 0     | 0      | 2  | 5    |    |   |    |        |    |
| 1      | 0    | 1     | 0     | 1     | 0     | 1    | 0       | 1       | 1   | 0     | 0      | 2  | 5    |    |   |    |        |    |
| 1      | 1    | 1     | 0     | 1     | 0     | 1    | 0       | 1       | 1   | 1     | 1      | 2  | 5    |    |   |    |        |    |
| 1      | 0    | 1     | 0     | 1     | 0     | 0    | 0       | 1       | 1   | 0     | 0      | 2  | 5    |    |   |    |        |    |
| 1      | 0    | 1     | 0     | 1     | 0     | 1    | 0       | 1       | 1   | 1     | 1      | 1  | 5    |    |   |    |        |    |



|   |   |   |   |   |   |   |   |   |
|---|---|---|---|---|---|---|---|---|
| 1 | 0 | 1 | 0 | 1 | 1 | 1 | 3 | 5 |
| 1 | 1 | 1 | 1 | 1 | 1 | 1 | 3 | 5 |
| 0 | 0 | 0 | 0 | 0 | 0 | 0 | 3 | 5 |
| 0 | 0 | 0 | 0 | 0 | 0 | 0 | 2 | 5 |
| 1 | 0 | 0 | 0 | 1 | 0 | 0 | 2 | 5 |
| 1 | 0 | 0 | 0 | 1 | 0 | 0 | 2 | 5 |
| 1 | 0 | 1 | 0 | 1 | 0 | 1 | 2 | 5 |
| 1 | 0 | 1 | 0 | 0 | 1 | 0 | 2 | 5 |
| 1 | 0 | 0 | 0 | 0 | 1 | 0 | 3 | 5 |
| 1 | 0 | 1 | 0 | 1 | 1 | 1 | 3 | 5 |
| 1 | 0 | 0 | 0 | 0 | 0 | 0 | 2 | 5 |
| 0 | 0 | 1 | 0 | 1 | 1 | 1 | 2 | 5 |
| 1 | 1 | 0 | 0 | 1 | 0 | 0 | 3 | 5 |
| 1 | 1 | 0 | 0 | 1 | 0 | 0 | 3 | 5 |
| 1 | 0 | 1 | 0 | 1 | 1 | 0 | 2 | 5 |
| 0 | 0 | 0 | 0 | 0 | 1 | 0 | 2 | 5 |
| 0 | 0 | 0 | 0 | 0 | 0 | 0 | 2 | 5 |
| 0 | 0 | 0 | 0 | 0 | 0 | 1 | 2 | 5 |
| 1 | 0 | 1 | 0 | 0 | 0 | 0 | 2 | 5 |
| 1 | 0 | 0 | 0 | 1 | 0 | 0 | 3 | 5 |
| 1 | 0 | 1 | 0 | 1 | 1 | 0 | 2 | 5 |
| 1 | 0 | 1 | 0 | 1 | 0 | 0 | 2 | 5 |
| 1 | 0 | 1 | 0 | 1 | 1 | 0 | 2 | 5 |
| 1 | 0 | 1 | 0 | 1 | 0 | 1 | 3 | 5 |
| 1 | 1 | 0 | 0 | 0 | 0 | 0 | 3 | 5 |
| 0 | 0 | 0 | 0 | 0 | 0 | 0 | 2 | 5 |
| 0 | 0 | 0 | 0 | 0 | 0 | 0 | 3 | 5 |
| 1 | 0 | 0 | 0 | 1 | 1 | 0 | 3 | 5 |
| 1 | 0 | 0 | 0 | 0 | 0 | 0 | 3 | 5 |
| 1 | 1 | 1 | 0 | 1 | 0 | 0 | 3 | 5 |
| 1 | 0 | 0 | 0 | 0 | 0 | 0 | 2 | 5 |
| 0 | 0 | 0 | 0 | 0 | 0 | 0 | 2 | 5 |
| 0 | 0 | 0 | 0 | 0 | 0 | 0 | 2 | 5 |
| 1 | 1 | 1 | 0 | 1 | 1 | 1 | 3 | 5 |
| 1 | 1 | 1 | 0 | 1 | 1 | 1 | 3 | 5 |
| 0 | 0 | 0 | 0 | 0 | 0 | 0 | 3 | 5 |
| 1 | 1 | 0 | 0 | 1 | 0 | 1 | 3 | 5 |
| 1 | 1 | 1 | 0 | 1 | 1 | 1 | 1 | 5 |
| 1 | 0 | 1 | 0 | 1 | 1 | 1 | 3 | 5 |
| 1 | 1 | 0 | 0 | 1 | 0 | 0 | 1 | 5 |
| 1 | 0 | 1 | 0 | 0 | 1 | 1 | 2 | 5 |
| 0 | 0 | 0 | 0 | 0 | 0 | 0 | 1 | 5 |
| 1 | 0 | 1 | 0 | 1 | 1 | 0 | 1 | 5 |
| 1 | 0 | 0 | 0 | 0 | 0 | 0 | 1 | 5 |
| 1 | 0 | 1 | 0 | 1 | 1 | 1 | 3 | 3 |
| 1 | 1 | 0 | 0 | 0 | 0 | 0 | 3 | 5 |

|   |   |   |   |   |   |   |   |   |
|---|---|---|---|---|---|---|---|---|
| 1 | 1 | 1 | 0 | 1 | 0 | 1 | 3 | 5 |
| 1 | 0 | 1 | 0 | 0 | 1 | 1 | 2 | 5 |
| 1 | 0 | 0 | 0 | 0 | 1 | 1 | 2 | 3 |
| 0 | 0 | 0 | 0 | 0 | 0 | 0 | 1 | 3 |
| 0 | 0 | 0 | 0 | 0 | 0 | 0 | 1 | 1 |
| 1 | 0 | 1 | 0 | 0 | 1 | 1 | 1 | 5 |
| 0 | 0 | 0 | 0 | 0 | 0 | 0 | 1 | 5 |
| 1 | 1 | 0 | 0 | 0 | 0 | 0 | 1 | 2 |
| 1 | 1 | 1 | 0 | 0 | 1 | 0 | 1 | 2 |
| 0 | 1 | 0 | 0 | 1 | 1 | 0 | 1 | 5 |
| 1 | 0 | 0 | 0 | 1 | 1 | 0 | 1 | 5 |
| 0 | 0 | 0 | 0 | 0 | 0 | 0 | 1 | 2 |
| 1 | 1 | 1 | 1 | 1 | 0 | 1 | 1 | 5 |
| 1 | 0 | 1 | 0 | 0 | 0 | 0 | 2 | 5 |
| 1 | 1 | 1 | 0 | 1 | 1 | 0 | 2 | 5 |
| 1 | 0 | 1 | 0 | 0 | 1 | 0 | 2 | 5 |
| 1 | 0 | 1 | 0 | 1 | 1 | 1 | 2 | 5 |
| 1 | 0 | 1 | 0 | 1 | 0 | 1 | 2 | 5 |
| 1 | 1 | 0 | 0 | 1 | 0 | 1 | 2 | 5 |
| 0 | 0 | 0 | 0 | 1 | 0 | 0 | 2 | 5 |
| 1 | 0 | 1 | 0 | 1 | 0 | 1 | 2 | 5 |
| 1 | 0 | 1 | 0 | 1 | 1 | 1 | 2 | 5 |
| 1 | 0 | 0 | 0 | 1 | 0 | 0 | 2 | 5 |
| 1 | 0 | 1 | 0 | 1 | 1 | 1 | 2 | 5 |
| 1 | 0 | 1 | 0 | 1 | 0 | 1 | 2 | 5 |
| 1 | 0 | 1 | 0 | 1 | 1 | 1 | 2 | 5 |
| 1 | 1 | 0 | 0 | 0 | 1 | 0 | 2 | 5 |
| 1 | 1 | 0 | 0 | 1 | 0 | 1 | 2 | 5 |
| 1 | 1 | 0 | 0 | 1 | 0 | 0 | 3 | 5 |
| 1 | 0 | 1 | 0 | 1 | 1 | 0 | 3 | 5 |
| 1 | 0 | 1 | 1 | 1 | 1 | 0 | 1 | 5 |
| 1 | 0 | 1 | 0 | 1 | 1 | 0 | 3 | 5 |
| 1 | 0 | 0 | 0 | 1 | 1 | 0 | 3 | 5 |
| 1 | 0 | 1 | 0 | 1 | 1 | 0 | 3 | 5 |
| 0 | 0 | 0 | 0 | 0 | 0 | 0 | 2 | 5 |
| 1 | 1 | 1 | 0 | 1 | 1 | 0 | 2 | 5 |
| 1 | 0 | 1 | 0 | 1 | 1 | 0 | 1 | 5 |
| 1 | 1 | 1 | 1 | 1 | 1 | 1 | 2 | 5 |
| 1 | 0 | 0 | 0 | 0 | 0 | 0 | 1 | 5 |
| 1 | 0 | 1 | 0 | 0 | 0 | 0 | 3 | 5 |
| 1 | 0 | 1 | 0 | 0 | 0 | 1 | 3 | 5 |
| 1 | 0 | 0 | 0 | 1 | 1 | 1 | 3 | 5 |
| 1 | 0 | 0 | 0 | 1 | 1 | 0 | 3 | 5 |
| 1 | 0 | 1 | 0 | 1 | 1 | 1 | 3 | 5 |
| 1 | 0 | 1 | 0 | 1 | 1 | 0 | 3 | 5 |
| 1 | 1 | 0 | 1 | 1 | 1 | 0 | 2 | 5 |

|   |   |   |   |   |   |   |   |   |
|---|---|---|---|---|---|---|---|---|
| 1 | 0 | 0 | 0 | 1 | 0 | 0 | 1 | 5 |
| 1 | 1 | 0 | 0 | 0 | 0 | 0 | 3 | 5 |
| 1 | 0 | 1 | 0 | 1 | 1 | 1 | 3 | 5 |
| 1 | 0 | 1 | 0 | 1 | 1 | 0 | 3 | 5 |
| 1 | 1 | 0 | 0 | 0 | 0 | 0 | 3 | 5 |
| 1 | 1 | 0 | 0 | 1 | 1 | 1 | 3 | 5 |
| 1 | 0 | 1 | 1 | 0 | 0 | 0 | 2 | 5 |
| 1 | 0 | 1 | 0 | 1 | 1 | 0 | 2 | 5 |
| 1 | 0 | 0 | 0 | 1 | 0 | 0 | 2 | 5 |
| 1 | 0 | 1 | 0 | 1 | 1 | 1 | 2 | 5 |
| 1 | 0 | 1 | 0 | 1 | 1 | 1 | 2 | 5 |
| 1 | 0 | 1 | 0 | 1 | 1 | 0 | 2 | 5 |
| 1 | 0 | 1 | 0 | 1 | 1 | 1 | 2 | 5 |
| 1 | 0 | 1 | 0 | 1 | 0 | 1 | 2 | 5 |
| 1 | 1 | 0 | 0 | 1 | 0 | 0 | 2 | 5 |
| 1 | 0 | 1 | 0 | 1 | 0 | 0 | 2 | 5 |
| 1 | 0 | 1 | 0 | 1 | 1 | 1 | 2 | 5 |
| 0 | 0 | 0 | 0 | 0 | 0 | 0 | 3 | 5 |
| 0 | 0 | 0 | 0 | 0 | 0 | 0 | 3 | 5 |
| 1 | 1 | 1 | 1 | 1 | 1 | 1 | 3 | 5 |
| 1 | 0 | 1 | 0 | 1 | 1 | 0 | 3 | 5 |
| 1 | 0 | 1 | 0 | 1 | 1 | 0 | 2 | 5 |
| 1 | 0 | 1 | 0 | 1 | 1 | 1 | 2 | 5 |
| 1 | 0 | 0 | 0 | 0 | 1 | 1 | 3 | 5 |
| 1 | 1 | 0 | 0 | 0 | 0 | 0 | 1 | 5 |
| 1 | 1 | 0 | 0 | 0 | 0 | 0 | 1 | 5 |
| 0 | 0 | 0 | 0 | 0 | 0 | 0 | 1 | 4 |
| 0 | 0 | 0 | 0 | 0 | 0 | 0 | 1 | 5 |
| 1 | 1 | 1 | 1 | 1 | 1 | 1 | 2 | 3 |
| 1 | 1 | 1 | 0 | 1 | 1 | 1 | 1 | 3 |
| 1 | 0 | 1 | 0 | 1 | 1 | 0 | 3 | 5 |
| 0 | 0 | 0 | 0 | 0 | 0 | 0 | 1 | 5 |
| 0 | 0 | 0 | 0 | 0 | 0 | 0 | 3 | 5 |
| 1 | 1 | 0 | 0 | 0 | 0 | 1 | 1 | 1 |
| 1 | 1 | 1 | 1 | 1 | 1 | 1 | 3 | 5 |
| 0 | 0 | 0 | 0 | 0 | 0 | 0 | 3 | 5 |
| 0 | 0 | 0 | 0 | 0 | 0 | 0 | 3 | 5 |
| 1 | 0 | 1 | 0 | 1 | 1 | 0 | 3 | 5 |
| 1 | 0 | 0 | 0 | 1 | 0 | 0 | 3 | 5 |
| 1 | 0 | 1 | 0 | 1 | 1 | 1 | 2 | 5 |
| 1 | 1 | 1 | 0 | 0 | 0 | 0 | 3 | 5 |
| 1 | 1 | 0 | 1 | 1 | 1 | 1 | 2 | 5 |
| 1 | 0 | 1 | 0 | 1 | 1 | 0 | 2 | 3 |
| 1 | 0 | 1 | 0 | 1 | 1 | 0 | 2 | 5 |
| 1 | 0 | 1 | 0 | 1 | 1 | 0 | 2 | 5 |
| 0 | 0 | 0 | 0 | 0 | 0 | 0 | 3 | 5 |
| 1 | 1 | 0 | 0 | 0 | 0 | 0 | 3 | 5 |

|   |   |   |   |   |   |   |   |   |
|---|---|---|---|---|---|---|---|---|
| 0 | 0 | 0 | 0 | 0 | 0 | 0 | 1 | 3 |
| 0 | 0 | 0 | 0 | 0 | 0 | 0 | 3 | 5 |
| 1 | 0 | 0 | 0 | 0 | 0 | 0 | 3 | 5 |
| 1 | 0 | 1 | 0 | 1 | 1 | 1 | 2 | 5 |
| 0 | 0 | 0 | 0 | 0 | 0 | 0 | 3 | 5 |
| 0 | 0 | 0 | 0 | 0 | 0 | 0 | 3 | 5 |
| 1 | 0 | 0 | 0 | 0 | 0 | 0 | 3 | 5 |
| 1 | 0 | 1 | 0 | 1 | 0 | 0 | 3 | 5 |
| 1 | 0 | 1 | 0 | 1 | 0 | 1 | 2 | 5 |
| 1 | 1 | 1 | 1 | 1 | 1 | 1 | 1 | 5 |
| 1 | 1 | 1 | 0 | 1 | 0 | 0 | 1 | 3 |
| 1 | 0 | 1 | 0 | 0 | 1 | 0 | 1 | 5 |
| 0 | 0 | 0 | 0 | 0 | 0 | 0 | 1 | 2 |
| 1 | 0 | 1 | 0 | 0 | 1 | 0 | 3 | 5 |
| 1 | 0 | 0 | 0 | 0 | 1 | 0 | 3 | 5 |
| 0 | 0 | 0 | 0 | 0 | 0 | 0 | 3 | 3 |
| 1 | 0 | 1 | 0 | 1 | 0 | 1 | 3 | 5 |
| 1 | 0 | 1 | 0 | 1 | 0 | 0 | 1 | 5 |
| 1 | 0 | 1 | 0 | 1 | 1 | 1 | 2 | 5 |
| 1 | 1 | 0 | 0 | 0 | 1 | 1 | 2 | 5 |
| 1 | 1 | 0 | 0 | 1 | 1 | 0 | 2 | 5 |
| 1 | 0 | 0 | 0 | 1 | 0 | 0 | 3 | 5 |
| 1 | 0 | 0 | 0 | 1 | 1 | 1 | 3 | 5 |
| 1 | 1 | 1 | 0 | 1 | 1 | 1 | 3 | 5 |
| 1 | 0 | 0 | 0 | 0 | 0 | 0 | 3 | 3 |
| 1 | 0 | 0 | 0 | 0 | 1 | 1 | 3 | 5 |
| 1 | 0 | 0 | 0 | 0 | 0 | 0 | 3 | 5 |
| 1 | 0 | 0 | 0 | 0 | 1 | 1 | 3 | 5 |
| 0 | 0 | 0 | 0 | 0 | 0 | 0 | 3 | 5 |
| 1 | 0 | 0 | 0 | 0 | 0 | 0 | 3 | 5 |
| 1 | 0 | 1 | 1 | 0 | 0 | 1 | 2 | 5 |
| 1 | 1 | 0 | 0 | 0 | 0 | 0 | 3 | 5 |
| 0 | 0 | 0 | 0 | 0 | 0 | 0 | 2 | 5 |
| 1 | 0 | 1 | 0 | 1 | 1 | 1 | 3 | 5 |
| 1 | 0 | 1 | 0 | 1 | 0 | 0 | 3 | 5 |
| 1 | 0 | 1 | 0 | 1 | 1 | 0 | 1 | 5 |
| 0 | 1 | 1 | 0 | 1 | 1 | 0 | 2 | 5 |
| 1 | 1 | 1 | 1 | 1 | 1 | 1 | 3 | 5 |
| 0 | 0 | 0 | 0 | 0 | 0 | 0 | 3 | 5 |
| 1 | 1 | 1 | 0 | 1 | 1 | 0 | 2 | 5 |
| 1 | 0 | 0 | 1 | 1 | 1 | 0 | 3 | 4 |
| 0 | 0 | 0 | 0 | 0 | 0 | 0 | 1 | 3 |
| 1 | 0 | 0 | 0 | 0 | 0 | 0 | 3 | 5 |
| 1 | 1 | 0 | 1 | 0 | 0 | 0 | 3 | 4 |
| 1 | 0 | 0 | 0 | 1 | 0 | 1 | 3 | 4 |
| 1 | 1 | 1 | 0 | 1 | 1 | 0 | 2 | 5 |
| 1 | 0 | 1 | 0 | 0 | 0 | 0 | 2 | 5 |

|   |   |   |   |   |   |   |   |   |
|---|---|---|---|---|---|---|---|---|
| 0 | 0 | 0 | 0 | 0 | 0 | 0 | 1 | 1 |
| 1 | 0 | 0 | 0 | 0 | 0 | 0 | 2 | 5 |
| 0 | 0 | 0 | 0 | 0 | 0 | 0 | 1 | 5 |
| 1 | 1 | 1 | 0 | 1 | 0 | 0 | 1 | 1 |
| 1 | 0 | 1 | 0 | 1 | 1 | 0 | 3 | 5 |
| 1 | 0 | 0 | 0 | 1 | 0 | 1 | 3 | 4 |
| 1 | 0 | 0 | 0 | 0 | 1 | 1 | 3 | 5 |
| 0 | 0 | 0 | 0 | 0 | 0 | 0 | 3 | 5 |
| 1 | 1 | 1 | 0 | 1 | 0 | 1 | 1 | 5 |
| 0 | 0 | 0 | 0 | 0 | 0 | 0 | 3 | 5 |
| 1 | 0 | 0 | 0 | 0 | 1 | 1 | 1 | 5 |
| 1 | 0 | 1 | 0 | 1 | 0 | 1 | 3 | 4 |
| 1 | 1 | 1 | 0 | 0 | 1 | 0 | 2 | 5 |
| 1 | 1 | 1 | 0 | 1 | 1 | 1 | 1 | 1 |
| 1 | 0 | 1 | 0 | 0 | 0 | 0 | 2 | 5 |
| 1 | 0 | 0 | 1 | 1 | 0 | 1 | 1 | 1 |
| 1 | 1 | 1 | 0 | 0 | 1 | 0 | 2 | 3 |
| 0 | 0 | 0 | 0 | 0 | 0 | 0 | 2 | 5 |
| 0 | 0 | 0 | 0 | 0 | 0 | 0 | 2 | 4 |
| 1 | 0 | 1 | 0 | 1 | 1 | 0 | 2 | 5 |
| 1 | 1 | 0 | 0 | 0 | 0 | 0 | 2 | 5 |
| 1 | 1 | 1 | 0 | 0 | 0 | 1 | 3 | 4 |
| 1 | 1 | 1 | 0 | 1 | 1 | 1 | 1 | 3 |
| 1 | 0 | 1 | 0 | 1 | 1 | 0 | 2 | 5 |
| 0 | 0 | 0 | 0 | 0 | 0 | 0 | 3 | 5 |
| 1 | 0 | 1 | 0 | 0 | 1 | 0 | 1 | 5 |
| 1 | 1 | 1 | 0 | 1 | 1 | 1 | 3 | 5 |
| 1 | 0 | 1 | 1 | 1 | 1 | 1 | 3 | 5 |
| 0 | 0 | 0 | 0 | 0 | 0 | 0 | 1 | 2 |
| 1 | 1 | 1 | 1 | 1 | 1 | 0 | 1 | 5 |
| 0 | 0 | 0 | 0 | 0 | 0 | 0 | 1 | 2 |
| 1 | 1 | 1 | 0 | 1 | 1 | 1 | 1 | 5 |
| 1 | 0 | 1 | 0 | 1 | 1 | 0 | 1 | 1 |
| 1 | 0 | 1 | 0 | 1 | 0 | 0 | 1 | 5 |
| 1 | 1 | 0 | 0 | 1 | 1 | 0 | 3 | 5 |
| 1 | 0 | 1 | 0 | 1 | 1 | 1 | 2 | 5 |
| 1 | 0 | 1 | 0 | 1 | 1 | 1 | 1 | 5 |
| 1 | 0 | 1 | 0 | 1 | 1 | 0 | 3 | 5 |
| 1 | 0 | 0 | 0 | 0 | 0 | 0 | 3 | 5 |
| 1 | 0 | 1 | 0 | 1 | 1 | 0 | 2 | 5 |
| 1 | 0 | 0 | 0 | 1 | 1 | 0 | 3 | 5 |
| 0 | 0 | 0 | 0 | 0 | 0 | 0 | 2 | 5 |
| 1 | 0 | 0 | 0 | 1 | 1 | 0 | 1 | 5 |
| 1 | 0 | 1 | 0 | 1 | 1 | 0 | 3 | 5 |
| 0 | 0 | 0 | 0 | 0 | 0 | 0 | 3 | 5 |
| 1 | 0 | 0 | 0 | 1 | 1 | 0 | 3 | 5 |

|   |   |   |   |   |   |   |   |   |
|---|---|---|---|---|---|---|---|---|
| 1 | 1 | 0 | 0 | 1 | 1 | 0 | 3 | 5 |
| 1 | 0 | 0 | 0 | 1 | 1 | 0 | 3 | 5 |
| 1 | 0 | 0 | 0 | 0 | 0 | 0 | 1 | 5 |
| 1 | 1 | 0 | 0 | 0 | 0 | 1 | 3 | 5 |
| 1 | 0 | 0 | 1 | 1 | 0 | 1 | 3 | 5 |
| 1 | 1 | 1 | 1 | 1 | 1 | 0 | 3 | 5 |
| 1 | 1 | 0 | 0 | 0 | 0 | 0 | 1 | 3 |
| 1 | 0 | 1 | 0 | 0 | 0 | 1 | 3 | 5 |
| 1 | 0 | 1 | 0 | 1 | 1 | 1 | 3 | 5 |
| 1 | 1 | 1 | 0 | 1 | 0 | 0 | 3 | 5 |
| 1 | 1 | 1 | 0 | 1 | 1 | 1 | 3 | 5 |
| 0 | 0 | 0 | 0 | 0 | 0 | 0 | 3 | 5 |
| 1 | 1 | 1 | 1 | 1 | 1 | 1 | 3 | 5 |
| 1 | 1 | 1 | 1 | 1 | 1 | 1 | 3 | 5 |
| 1 | 1 | 1 | 1 | 1 | 1 | 1 | 3 | 5 |
| 1 | 1 | 1 | 1 | 1 | 1 | 1 | 3 | 5 |
| 0 | 0 | 0 | 0 | 0 | 0 | 0 | 1 | 5 |
| 1 | 1 | 1 | 1 | 1 | 1 | 1 | 3 | 5 |
| 1 | 1 | 1 | 1 | 1 | 1 | 1 | 3 | 5 |
| 1 | 1 | 1 | 1 | 1 | 1 | 1 | 3 | 5 |
| 0 | 0 | 0 | 0 | 0 | 0 | 0 | 1 | 5 |
| 1 | 1 | 1 | 1 | 1 | 1 | 1 | 3 | 5 |
| 1 | 1 | 1 | 1 | 1 | 1 | 1 | 3 | 5 |
| 1 | 1 | 0 | 1 | 1 | 1 | 1 | 3 | 5 |
| 1 | 1 | 0 | 0 | 1 | 1 | 0 | 2 | 5 |
| 1 | 1 | 1 | 0 | 1 | 1 | 0 | 1 | 5 |
| 0 | 0 | 0 | 0 | 0 | 0 | 0 | 1 | 5 |
| 1 | 0 | 0 | 1 | 1 | 0 | 0 | 1 | 5 |
| 1 | 0 | 1 | 1 | 0 | 1 | 1 | 1 | 2 |
| 0 | 0 | 0 | 0 | 0 | 0 | 0 | 2 | 5 |
| 0 | 0 | 0 | 0 | 0 | 0 | 0 | 1 | 4 |
| 0 | 0 | 0 | 0 | 0 | 0 | 0 | 1 | 5 |
| 1 | 0 | 1 | 0 | 0 | 1 | 0 | 1 | 1 |
| 1 | 1 | 1 | 0 | 0 | 0 | 0 | 1 | 2 |
| 1 | 1 | 0 | 0 | 0 | 1 | 0 | 1 | 1 |
| 1 | 1 | 1 | 1 | 0 | 1 | 1 | 3 | 5 |
| 0 | 0 | 0 | 0 | 0 | 0 | 0 | 1 | 5 |
| 0 | 0 | 0 | 0 | 0 | 0 | 0 | 1 | 3 |
| 1 | 1 | 0 | 0 | 1 | 1 | 0 | 1 | 1 |
| 0 | 0 | 0 | 0 | 0 | 0 | 0 | 1 | 2 |
| 0 | 0 | 0 | 0 | 0 | 0 | 0 | 1 | 4 |
| 1 | 1 | 0 | 0 | 1 | 0 | 0 | 1 | 2 |
| 0 | 0 | 0 | 0 | 0 | 0 | 0 | 1 | 1 |
| 1 | 0 | 1 | 0 | 1 | 0 | 1 | 2 | 3 |
| 1 | 1 | 1 | 0 | 1 | 0 | 1 | 3 | 5 |
| 1 | 1 | 0 | 0 | 0 | 1 | 0 | 1 | 5 |
| 1 | 0 | 1 | 0 | 1 | 1 | 0 | 3 | 5 |
| 0 | 0 | 0 | 0 | 0 | 0 | 0 | 3 | 5 |
| 1 | 0 | 1 | 1 | 1 | 0 | 1 | 1 | 3 |
| 1 | 1 | 0 | 0 | 0 | 0 | 0 | 1 | 2 |



|   |   |   |   |   |   |   |   |   |
|---|---|---|---|---|---|---|---|---|
| 1 | 1 | 1 | 1 | 1 | 1 | 0 | 1 | 3 |
| 1 | 1 | 1 | 1 | 0 | 1 | 1 | 2 | 2 |
| 1 | 1 | 1 | 0 | 1 | 0 | 1 | 1 | 3 |
| 1 | 1 | 1 | 0 | 0 | 1 | 1 | 2 | 5 |
| 0 | 0 | 0 | 0 | 0 | 0 | 0 | 1 | 4 |
| 1 | 1 | 1 | 1 | 0 | 1 | 1 | 1 | 1 |
| 1 | 0 | 0 | 0 | 0 | 0 | 0 | 2 | 5 |
| 1 | 0 | 1 | 0 | 1 | 1 | 0 | 2 | 3 |
| 1 | 1 | 0 | 1 | 0 | 0 | 1 | 2 | 4 |
| 0 | 0 | 0 | 0 | 0 | 0 | 0 | 2 | 5 |
| 1 | 0 | 1 | 0 | 1 | 1 | 0 | 2 | 4 |
| 0 | 0 | 0 | 0 | 0 | 0 | 0 | 2 | 5 |
| 1 | 0 | 1 | 0 | 1 | 0 | 1 | 2 | 3 |
| 1 | 1 | 1 | 0 | 1 | 1 | 1 | 3 | 5 |
| 0 | 0 | 0 | 0 | 0 | 0 | 0 | 2 | 5 |
| 1 | 0 | 1 | 0 | 1 | 1 | 1 | 2 | 5 |
| 1 | 0 | 1 | 0 | 1 | 1 | 1 | 2 | 5 |
| 1 | 1 | 1 | 0 | 1 | 1 | 0 | 2 | 5 |
| 1 | 1 | 1 | 0 | 1 | 1 | 0 | 2 | 5 |
| 0 | 0 | 0 | 0 | 0 | 0 | 0 | 2 | 5 |
| 1 | 0 | 1 | 0 | 1 | 1 | 0 | 2 | 5 |
| 1 | 1 | 1 | 0 | 1 | 1 | 1 | 2 | 5 |
| 1 | 1 | 1 | 0 | 1 | 1 | 1 | 2 | 5 |
| 0 | 0 | 0 | 0 | 0 | 0 | 0 | 1 | 5 |
| 1 | 0 | 1 | 0 | 1 | 1 | 0 | 1 | 5 |
| 1 | 1 | 1 | 0 | 1 | 1 | 0 | 2 | 5 |
| 1 | 0 | 1 | 0 | 1 | 1 | 0 | 2 | 5 |
| 0 | 0 | 0 | 0 | 0 | 0 | 0 | 3 | 5 |
| 0 | 0 | 0 | 0 | 0 | 0 | 0 | 1 | 5 |
| 1 | 1 | 1 | 1 | 1 | 1 | 0 | 1 | 5 |
| 1 | 0 | 1 | 0 | 1 | 0 | 1 | 2 | 5 |
| 1 | 0 | 1 | 0 | 1 | 0 | 1 | 2 | 5 |
| 0 | 0 | 0 | 0 | 0 | 0 | 0 | 2 | 5 |
| 1 | 0 | 1 | 0 | 1 | 0 | 1 | 1 | 5 |
| 1 | 0 | 0 | 0 | 1 | 0 | 1 | 3 | 5 |
| 0 | 0 | 0 | 0 | 0 | 0 | 0 | 3 | 5 |
| 1 | 0 | 1 | 0 | 1 | 1 | 0 | 3 | 5 |
| 0 | 0 | 0 | 0 | 0 | 0 | 0 | 3 | 5 |
| 0 | 0 | 0 | 0 | 0 | 0 | 0 | 3 | 5 |
| 0 | 0 | 0 | 0 | 0 | 0 | 0 | 3 | 5 |
| 1 | 1 | 1 | 0 | 1 | 1 | 0 | 3 | 5 |
| 1 | 1 | 1 | 0 | 1 | 1 | 0 | 3 | 5 |
| 1 | 0 | 1 | 0 | 1 | 0 | 1 | 3 | 5 |
| 1 | 0 | 1 | 1 | 0 | 0 | 1 | 3 | 5 |
| 1 | 1 | 1 | 1 | 1 | 1 | 1 | 3 | 5 |
| 1 | 1 | 1 | 0 | 1 | 0 | 0 | 3 | 5 |
| 1 | 1 | 1 | 0 | 1 | 1 | 1 | 3 | 5 |

|   |   |   |   |   |   |   |   |   |
|---|---|---|---|---|---|---|---|---|
| 1 | 0 | 0 | 1 | 0 | 0 | 0 | 3 | 5 |
| 1 | 0 | 0 | 0 | 1 | 1 | 1 | 3 | 5 |
| 1 | 0 | 0 | 0 | 1 | 0 | 1 | 3 | 5 |
| 1 | 0 | 0 | 0 | 1 | 1 | 1 | 3 | 5 |
| 1 | 0 | 0 | 0 | 0 | 0 | 0 | 3 | 3 |
| 0 | 0 | 0 | 0 | 0 | 0 | 0 | 3 | 5 |
| 1 | 1 | 1 | 0 | 1 | 1 | 1 | 3 | 5 |
| 1 | 1 | 1 | 1 | 1 | 1 | 1 | 1 | 5 |
| 1 | 1 | 1 | 1 | 1 | 1 | 1 | 3 | 5 |
| 1 | 1 | 1 | 0 | 1 | 1 | 1 | 3 | 5 |
| 1 | 1 | 1 | 1 | 1 | 1 | 1 | 3 | 5 |
| 1 | 1 | 1 | 1 | 1 | 1 | 1 | 3 | 5 |
| 1 | 1 | 1 | 1 | 1 | 1 | 1 | 1 | 5 |
| 1 | 1 | 1 | 1 | 1 | 1 | 1 | 3 | 5 |
| 0 | 0 | 0 | 0 | 0 | 0 | 0 | 3 | 5 |
| 1 | 1 | 1 | 1 | 1 | 1 | 1 | 3 | 5 |
| 0 | 0 | 0 | 0 | 0 | 0 | 0 | 3 | 5 |
| 1 | 1 | 1 | 1 | 1 | 1 | 1 | 3 | 5 |
| 0 | 0 | 0 | 0 | 0 | 0 | 0 | 3 | 5 |
| 0 | 0 | 0 | 0 | 0 | 0 | 0 | 3 | 5 |
| 1 | 1 | 1 | 1 | 1 | 1 | 1 | 3 | 5 |
| 1 | 1 | 1 | 1 | 1 | 1 | 1 | 3 | 5 |
| 1 | 0 | 0 | 0 | 1 | 0 | 1 | 3 | 5 |
| 0 | 0 | 0 | 0 | 0 | 0 | 0 | 3 | 5 |
| 0 | 0 | 0 | 0 | 0 | 0 | 0 | 3 | 5 |
| 0 | 0 | 0 | 0 | 0 | 0 | 0 | 3 | 5 |
| 1 | 0 | 1 | 0 | 1 | 1 | 0 | 3 | 5 |
| 0 | 0 | 0 | 0 | 0 | 0 | 0 | 3 | 5 |
| 1 | 0 | 1 | 1 | 1 | 0 | 0 | 3 | 5 |
| 0 | 0 | 0 | 0 | 0 | 0 | 0 | 3 | 5 |
| 1 | 0 | 1 | 0 | 1 | 1 | 0 | 3 | 5 |
| 1 | 1 | 1 | 0 | 1 | 1 | 0 | 3 | 5 |
| 1 | 0 | 1 | 0 | 1 | 1 | 0 | 3 | 3 |
| 1 | 0 | 1 | 1 | 1 | 1 | 0 | 3 | 5 |
| 1 | 1 | 1 | 0 | 1 | 1 | 0 | 3 | 5 |
| 1 | 0 | 0 | 0 | 0 | 0 | 0 | 3 | 5 |
| 1 | 1 | 1 | 1 | 0 | 1 | 1 | 1 | 5 |
| 1 | 1 | 1 | 0 | 0 | 1 | 0 | 3 | 5 |
| 0 | 0 | 0 | 0 | 0 | 0 | 0 | 1 | 5 |
| 1 | 1 | 1 | 0 | 1 | 1 | 1 | 3 | 5 |
| 1 | 0 | 0 | 0 | 1 | 0 | 0 | 3 | 5 |
| 1 | 1 | 0 | 0 | 0 | 0 | 0 | 3 | 5 |
| 1 | 0 | 1 | 0 | 1 | 1 | 1 | 3 | 5 |
| 0 | 0 | 0 | 0 | 0 | 0 | 0 | 2 | 5 |
| 0 | 0 | 0 | 0 | 0 | 0 | 0 | 3 | 5 |
| 1 | 0 | 1 | 0 | 1 | 1 | 1 | 3 | 5 |
| 1 | 0 | 1 | 0 | 1 | 1 | 1 | 3 | 5 |

|   |   |   |   |   |   |   |   |   |
|---|---|---|---|---|---|---|---|---|
| 1 | 0 | 1 | 0 | 1 | 1 | 1 | 2 | 5 |
| 1 | 0 | 1 | 0 | 1 | 1 | 1 | 2 | 5 |
| 1 | 0 | 1 | 0 | 1 | 1 | 1 | 2 | 5 |
| 1 | 0 | 1 | 0 | 1 | 1 | 1 | 2 | 5 |
| 1 | 0 | 0 | 0 | 1 | 0 | 0 | 2 | 5 |
| 1 | 1 | 0 | 0 | 0 | 0 | 0 | 3 | 5 |
| 1 | 1 | 0 | 0 | 1 | 0 | 0 | 2 | 5 |
| 1 | 1 | 1 | 0 | 0 | 0 | 1 | 3 | 5 |
| 1 | 1 | 1 | 0 | 0 | 1 | 1 | 2 | 5 |
| 1 | 1 | 1 | 0 | 0 | 1 | 1 | 2 | 5 |
| 1 | 0 | 1 | 0 | 1 | 1 | 0 | 2 | 5 |
| 1 | 0 | 1 | 0 | 1 | 1 | 1 | 1 | 5 |
| 1 | 0 | 1 | 0 | 1 | 1 | 1 | 3 | 5 |
| 0 | 0 | 0 | 0 | 0 | 0 | 0 | 3 | 5 |
| 0 | 0 | 0 | 0 | 0 | 0 | 0 | 3 | 5 |
| 1 | 0 | 1 | 0 | 1 | 1 | 1 | 3 | 5 |
| 1 | 0 | 1 | 1 | 1 | 1 | 1 | 1 | 5 |
| 0 | 0 | 0 | 0 | 0 | 0 | 0 | 3 | 5 |
| 1 | 0 | 1 | 0 | 0 | 1 | 0 | 3 | 5 |
| 1 | 1 | 1 | 0 | 1 | 1 | 0 | 3 | 5 |
| 0 | 0 | 0 | 0 | 0 | 0 | 0 | 3 | 5 |
| 1 | 1 | 1 | 0 | 1 | 1 | 0 | 3 | 5 |
| 1 | 1 | 0 | 0 | 1 | 1 | 0 | 3 | 5 |
| 1 | 0 | 1 | 0 | 0 | 1 | 0 | 3 | 5 |
| 1 | 0 | 0 | 0 | 0 | 1 | 0 | 3 | 5 |
| 1 | 0 | 1 | 0 | 1 | 1 | 0 | 3 | 5 |
| 1 | 1 | 1 | 1 | 1 | 1 | 1 | 3 | 5 |
| 1 | 1 | 1 | 1 | 1 | 1 | 1 | 3 | 5 |
| 1 | 1 | 1 | 0 | 0 | 0 | 0 | 3 | 5 |
| 0 | 0 | 0 | 0 | 0 | 0 | 0 | 1 | 5 |
| 1 | 0 | 1 | 0 | 0 | 1 | 1 | 1 | 1 |
| 1 | 0 | 1 | 0 | 1 | 1 | 1 | 1 | 5 |
| 1 | 0 | 1 | 0 | 0 | 1 | 0 | 1 | 3 |
| 1 | 1 | 1 | 0 | 1 | 1 | 1 | 2 | 3 |
| 0 | 0 | 0 | 0 | 0 | 0 | 0 | 1 | 1 |
| 0 | 0 | 0 | 0 | 0 | 0 | 0 | 2 | 3 |
| 0 | 0 | 0 | 0 | 0 | 0 | 0 | 1 | 5 |
| 1 | 0 | 0 | 0 | 0 | 1 | 0 | 1 | 3 |
| 1 | 0 | 1 | 0 | 1 | 1 | 0 | 2 | 5 |
| 0 | 0 | 0 | 0 | 0 | 0 | 0 | 3 | 5 |
| 0 | 0 | 0 | 0 | 0 | 0 | 0 | 1 | 5 |
| 0 | 0 | 0 | 0 | 0 | 0 | 0 | 1 | 1 |
| 0 | 0 | 0 | 0 | 0 | 0 | 0 | 2 | 5 |
| 1 | 1 | 0 | 0 | 1 | 1 | 0 | 1 | 1 |
| 0 | 0 | 0 | 0 | 0 | 0 | 0 | 2 | 5 |
| 0 | 0 | 0 | 0 | 0 | 0 | 0 | 1 | 5 |
| 1 | 1 | 0 | 0 | 0 | 1 | 0 | 1 | 2 |



| L3SOURCE       | L3aOtherli | L4TypeofFL | L4aotherFL | Radio | Computer | ColorBlack | Electricfan | Satellitedis |
|----------------|------------|------------|------------|-------|----------|------------|-------------|--------------|
| 3              |            | 5          |            |       | 0        | 0          | 0           | 0            |
| 1              |            | 5          |            |       | 0        | 0          | 1           | 0            |
| 1              |            | 5          |            |       | 0        | 0          | 0           | 0            |
| 4              |            | 5          |            |       | 0        | 0          | 0           | 0            |
| 1              |            | 3          |            |       | 1        | 1          | 0           | 1            |
| 4              |            | 3          |            |       | 1        | 0          | 1           | 0            |
| 1 1            |            | 1          |            |       | 0        | 0          | 1           | 1            |
| 1              |            | 2 charcoal |            |       | 1        | 0          | 1           | 1            |
| 1              |            | 3          |            |       | 1        | 0          | 1           | 0            |
| 1              |            | 5          |            |       | 1        | 0          | 1           | 0            |
| 1              |            | 3          |            |       | 1        | 0          | 1           | 1            |
| 1              |            | 5          |            |       | 1        | 0          | 0           | 0            |
| 3 flash light; |            | 5          |            |       | 1        | 0          | 0           | 0            |
| 1 Maches       |            | 3          |            |       | 0        | 0          | 0           | 0            |
| 1              |            | 5          |            |       | 1        | 0          | 1           | 1            |
| 1              |            | 5          |            |       | 1        | 0          | 1           | 0            |
| 4              |            | 5          |            |       | 1        | 0          | 0           | 0            |
| 4              |            | 3 firewood |            |       | 1        | 1          | 0           | 1            |
| 1              |            | 5          |            |       | 0        | 0          | 1           | 0            |
| 1              |            | 1          |            |       | 0        | 0          | 1           | 0            |
| 4              |            | 5          |            |       | 0        | 0          | 0           | 0            |
| 1              |            | 5          |            |       | 1        | 0          | 1           | 1            |
| 1              |            | 3 firewood |            |       | 1        | 0          | 1           | 1            |
| 1              |            | 2 charcoal |            |       | 1        | 1          | 1           | 1            |
| 1              |            | 3 0        |            |       | 0        | 0          | 0           | 0            |
| 1              |            | 5          |            |       | 1        | 1          | 1           | 1            |
| 1              |            | 5          |            |       | 0        | 0          | 1           | 1            |
| 1              |            | 5          |            |       | 0        | 0          | 0           | 1            |
| 1              |            | 5          |            |       | 1        | 0          | 1           | 0            |
| 2              |            | 5          |            |       | 1        | 0          | 0           | 0            |
| 4              |            | 5          |            |       | 1        | 0          | 0           | 0            |
| 3              |            | 5          |            |       | 0        | 0          | 0           | 0            |
| 1              |            | 5          |            |       | 1        | 0          | 0           | 0            |
| 4              |            | 5          |            |       | 0        | 0          | 0           | 0            |
| 4              |            | 5          |            |       | 0        | 0          | 0           | 0            |
| 4              |            | 5 1        |            |       | 1        | 0          | 1           | 0            |
| 4              |            | 5          |            |       | 0        | 0          | 0           | 0            |
| 4              |            | 3          |            |       | 0        | 0          | 0           | 0            |
| 4              |            | 5          |            |       | 1        | 0          | 1           | 0            |
| 4              |            | 5          |            |       | 0        | 0          | 0           | 0            |
| 4              |            | 5          |            |       | 1        | 0          | 0           | 0            |
| 4              |            | 3 firewood |            |       | 0        | 0          | 1           | 1            |
| 1              |            | 5          |            |       | 0        | 0          | 1           | 1            |
| 1              |            | 5          |            |       | 0        | 0          | 1           | 1            |
| 1              |            | 5          |            |       | 0        | 0          | 0           | 0            |
| 1              |            | 5          |            |       | 0        | 0          | 0           | 0            |

|   |               |   |   |   |   |   |
|---|---------------|---|---|---|---|---|
| 1 | 5             | 0 | 0 | 0 | 0 | 0 |
| 1 | 5             | 0 | 0 | 0 | 0 | 0 |
| 1 | 5             | 0 | 0 | 0 | 0 | 0 |
| 4 | 5             | 0 | 0 | 0 | 0 | 0 |
| 3 | 5             | 0 | 0 | 0 | 0 | 0 |
| 1 | 3             | 1 | 1 | 1 | 1 | 1 |
| 4 | 5             | 0 | 0 | 0 | 0 | 0 |
| 4 | 5             | 1 | 0 | 0 | 0 | 0 |
| 5 | 4             | 1 | 0 | 1 | 1 | 1 |
| 4 | 5             | 0 | 0 | 0 | 0 | 0 |
| 4 | 5             | 1 | 0 | 0 | 0 | 0 |
| 4 | 5             | 0 | 0 | 0 | 0 | 0 |
| 4 | 5             | 0 | 0 | 0 | 0 | 0 |
| 3 | 1             | 1 | 0 | 1 | 1 | 1 |
| 4 | 5             | 0 | 0 | 0 | 0 | 0 |
| 4 | 5             | 0 | 0 | 0 | 0 | 0 |
| 4 | 5 0           | 0 | 0 | 0 | 0 | 0 |
| 1 | 5             | 0 | 0 | 0 | 1 | 0 |
| 4 | 5             | 1 | 0 | 0 | 0 | 0 |
| 4 | 5             | 1 | 0 | 0 | 0 | 0 |
| 4 | 5             | 1 | 0 | 0 | 0 | 0 |
| 4 | 5             | 0 | 0 | 0 | 0 | 0 |
| 4 | 5             | 1 | 0 | 0 | 0 | 0 |
| 4 | 5             | 0 | 0 | 0 | 0 | 0 |
| 4 | 5 0           | 0 | 0 | 0 | 0 | 0 |
| 4 | 5             | 0 | 0 | 0 | 0 | 0 |
| 4 | 6 corn stocks | 0 | 0 | 0 | 0 | 0 |
| 1 | 5             | 1 | 0 | 0 | 1 | 0 |
| 1 | 5             | 0 | 0 | 1 | 0 | 1 |
| 4 | 2             | 0 | 0 | 0 | 0 | 0 |
| 4 | 4             | 0 | 0 | 0 | 0 | 0 |
| 4 | 5             | 1 | 0 | 0 | 0 | 0 |
| 4 | 5             | 1 | 0 | 0 | 0 | 0 |
| 4 | 5             | 0 | 0 | 0 | 0 | 0 |
| 4 | 5             | 0 | 0 | 0 | 0 | 0 |
| 4 | 5             | 1 | 0 | 0 | 0 | 0 |
| 2 | 5 0           | 0 | 0 | 0 | 0 | 0 |
| 1 | 2             | 1 | 0 | 1 | 1 | 1 |
| 4 | 5 1           | 1 | 0 | 0 | 0 | 0 |
| 1 | 3             | 1 | 0 | 1 | 0 | 1 |
| 4 | 5             | 1 | 0 | 0 | 0 | 0 |
| 4 | 5             | 0 | 0 | 0 | 0 | 0 |
| 1 | 5             | 1 | 0 | 0 | 0 | 0 |
| 4 | 5             | 1 | 0 | 0 | 0 | 0 |
| 4 | 5             | 1 | 0 | 0 | 0 | 0 |
| 4 | 5             | 0 | 0 | 0 | 0 | 0 |
| 3 | 5             | 1 | 0 | 0 | 0 | 0 |

|               |   |   |   |   |   |   |
|---------------|---|---|---|---|---|---|
| 1             | 4 | 0 | 0 | 0 | 0 | 0 |
| 1             | 5 | 1 | 0 | 0 | 0 | 0 |
| 1             | 5 | 0 | 0 | 1 | 0 | 1 |
| 1 Torch Light | 5 | 0 | 0 | 0 | 0 | 0 |
| 4             | 5 | 1 | 0 | 1 | 1 | 0 |
| 4             | 5 | 0 | 0 | 0 | 0 | 0 |
| 4             | 5 | 1 | 0 | 0 | 1 | 1 |
| 4             | 5 | 0 | 0 | 0 | 0 | 0 |
| 4             | 5 | 0 | 0 | 0 | 0 | 0 |
| 4             | 5 | 0 | 0 | 0 | 0 | 0 |
| 4             | 5 | 1 | 0 | 0 | 0 | 0 |
| 4             | 5 | 0 | 0 | 0 | 0 | 0 |
| 4             | 5 | 1 | 0 | 0 | 0 | 0 |
| 4             | 5 | 1 | 0 | 0 | 0 | 0 |
| 4             | 5 | 1 | 0 | 0 | 0 | 0 |
| 4             | 5 | 1 | 0 | 0 | 0 | 0 |
| 4             | 5 | 1 | 0 | 0 | 0 | 0 |
| 4             | 5 | 0 | 0 | 0 | 0 | 0 |
| 4             | 5 | 0 | 0 | 0 | 0 | 0 |
| 4             | 5 | 1 | 0 | 0 | 0 | 0 |
| 4             | 5 | 0 | 0 | 0 | 0 | 0 |
| 4             | 5 | 1 | 0 | 0 | 0 | 0 |
| 4             | 5 | 1 | 0 | 0 | 0 | 0 |
| 4             | 5 | 1 | 0 | 0 | 0 | 0 |
| 4             | 5 | 1 | 0 | 1 | 0 | 1 |
| 1             | 5 | 0 | 0 | 0 | 0 | 0 |
| 1             | 5 | 0 | 0 | 1 | 0 | 1 |
| 4             | 5 | 1 | 0 | 0 | 0 | 0 |
| 4             | 5 | 0 | 0 | 0 | 0 | 0 |
| 4             | 5 | 1 | 0 | 0 | 0 | 0 |
| 1             | 5 | 1 | 0 | 1 | 1 | 1 |
| 4             | 5 | 0 | 0 | 0 | 0 | 0 |
| 3             | 5 | 1 | 0 | 1 | 0 | 0 |
| 1             | 5 | 1 | 0 | 1 | 0 | 1 |
| 4             | 5 | 0 | 0 | 0 | 0 | 0 |
| 3             | 5 | 0 | 0 | 0 | 0 | 0 |
| 4             | 5 | 1 | 0 | 1 | 0 | 1 |
| 4             | 5 | 1 | 0 | 0 | 0 | 0 |
| 4             | 5 | 0 | 0 | 0 | 0 | 0 |
| 4             | 5 | 1 | 0 | 0 | 0 | 0 |
| 4             | 5 | 1 | 0 | 0 | 0 | 0 |
| 4             | 5 | 1 | 0 | 0 | 0 | 0 |
| 4             | 5 | 1 | 0 | 0 | 0 | 0 |
| 4             | 5 | 1 | 0 | 0 | 0 | 0 |
| 4             | 5 | 0 | 0 | 0 | 0 | 0 |
| 4             | 3 | 1 | 0 | 0 | 0 | 0 |

|   |     |   |   |   |   |   |
|---|-----|---|---|---|---|---|
| 1 | 5   | 0 | 0 | 1 | 0 | 1 |
| 1 | 5   | 1 | 0 | 1 | 0 | 1 |
| 1 | 5   | 1 | 0 | 0 | 0 | 0 |
| 1 | 3   | 1 | 0 | 1 | 1 | 1 |
| 1 | 3   | 1 | 1 | 1 | 1 | 1 |
| 1 | 1   | 1 | 0 | 1 | 1 | 1 |
| 4 | 3   | 0 | 0 | 0 | 0 | 0 |
| 4 | 5   | 1 | 0 | 1 | 1 | 1 |
| 1 | 3   | 0 | 0 | 1 | 1 | 1 |
| 1 | 3   | 1 | 0 | 1 | 1 | 1 |
| 1 | 5   | 1 | 0 | 1 | 1 | 1 |
| 1 | 5   | 1 | 0 | 1 | 1 | 1 |
| 4 | 5   | 1 | 0 | 0 | 0 | 0 |
| 4 | 5   | 0 | 0 | 0 | 0 | 0 |
| 4 | 5   | 0 | 0 | 0 | 0 | 0 |
| 4 | 5   | 1 | 0 | 0 | 0 | 0 |
| 4 | 5   | 0 | 0 | 0 | 0 | 0 |
| 1 | 5   | 1 | 0 | 1 | 1 | 1 |
| 4 | 5   | 0 | 0 | 0 | 0 | 0 |
| 4 | 5   | 1 | 0 | 0 | 0 | 0 |
| 4 | 1 0 | 0 | 0 | 0 | 0 | 0 |
| 1 | 4   | 1 | 0 | 0 | 0 | 0 |
| 4 | 5   | 0 | 0 | 0 | 0 | 0 |
| 4 | 5   | 0 | 0 | 1 | 0 | 1 |
| 1 | 5   | 0 | 0 | 1 | 0 | 1 |
| 4 | 5   | 0 | 0 | 0 | 0 | 0 |
| 4 | 5   | 1 | 0 | 0 | 0 | 0 |
| 4 | 5   | 1 | 0 | 0 | 0 | 0 |
| 4 | 5   | 0 | 0 | 0 | 0 | 0 |
| 4 | 5   | 0 | 0 | 0 | 0 | 0 |
| 4 | 5   | 1 | 0 | 0 | 0 | 0 |
| 4 | 5   | 0 | 0 | 0 | 0 | 0 |
| 4 | 5   | 1 | 0 | 0 | 0 | 0 |
| 4 | 5   | 0 | 0 | 0 | 0 | 0 |
| 4 | 5   | 0 | 0 | 0 | 0 | 0 |
| 4 | 5   | 1 | 0 | 0 | 0 | 0 |
| 4 | 5   | 1 | 0 | 0 | 0 | 0 |
| 4 | 5   | 0 | 0 | 0 | 0 | 0 |
| 2 | 5   | 1 | 0 | 0 | 0 | 0 |
| 4 | 5   | 1 | 0 | 0 | 0 | 0 |
| 4 | 5   | 1 | 0 | 1 | 0 | 1 |
| 4 | 5   | 1 | 0 | 0 | 0 | 0 |
| 4 | 5   | 0 | 0 | 0 | 0 | 0 |
| 4 | 5   | 1 | 0 | 0 | 0 | 0 |
| 4 | 5   | 1 | 0 | 0 | 0 | 0 |
| 4 | 5   | 1 | 0 | 0 | 0 | 0 |
| 4 | 5   | 1 | 0 | 0 | 0 | 0 |



|                |                |   |   |   |   |   |
|----------------|----------------|---|---|---|---|---|
| 1              | 5              | 0 | 0 | 1 | 0 | 1 |
| 1              | 3              | 0 | 0 | 1 | 0 | 1 |
| 4 Flash light  | 5              | 1 | 0 | 0 | 0 | 0 |
| 1              | 3              | 1 | 0 | 1 | 1 | 1 |
| 1              | 5              | 1 | 0 | 1 | 0 | 1 |
| 4 Lamp         | 5              | 0 | 0 | 0 | 0 | 0 |
| 5 dry cell tou | 5              | 1 | 0 | 0 | 0 | 0 |
| 1              | 5              | 1 | 0 | 1 | 1 | 1 |
| 4              | 5              | 1 | 0 | 0 | 0 | 0 |
| 4              | 5              | 1 | 0 | 0 | 0 | 0 |
| 4              | 5              | 0 | 0 | 0 | 0 | 0 |
| 4              | 5              | 1 | 0 | 0 | 0 | 0 |
| 4              | 5              | 1 | 0 | 0 | 0 | 0 |
| 4              | 5              | 0 | 0 | 0 | 0 | 0 |
| 4              | 5              | 1 | 0 | 0 | 0 | 0 |
| 4              | 5              | 0 | 0 | 0 | 0 | 0 |
| 4              | 5              | 1 | 0 | 0 | 0 | 0 |
| 1 0            | 3 firewood     | 1 | 0 | 0 | 0 | 0 |
| 4              | 5              | 1 | 0 | 0 | 0 | 0 |
| 4              | 5              | 0 | 0 | 0 | 0 | 0 |
| 1              | 5              | 0 | 0 | 0 | 0 | 0 |
| 4              | 5              | 1 | 0 | 0 | 0 | 0 |
| 4              | 5              | 0 | 0 | 0 | 0 | 0 |
| 4              | 5              | 0 | 0 | 0 | 0 | 0 |
| 1              | 3 Firewood     | 0 | 1 | 1 | 1 | 1 |
| 1              | 2              | 1 | 1 | 1 | 1 | 1 |
| 1              | 3              | 1 | 0 | 1 | 1 | 1 |
| 1              | 3              | 1 | 0 | 1 | 1 | 1 |
| 1              | 2 charcoal     | 1 | 1 | 1 | 1 | 1 |
| 1              | 3              | 1 | 1 | 1 | 0 | 1 |
| 1              | 3              | 0 | 0 | 1 | 1 | 1 |
| 1              | 2              | 1 | 0 | 1 | 1 | 1 |
| 4              | 5              | 1 | 0 | 0 | 0 | 0 |
| 1              | 3              | 1 | 0 | 1 | 1 | 1 |
| 4              | 5              | 0 | 0 | 0 | 0 | 0 |
| 4              | 5              | 0 | 0 | 0 | 0 | 0 |
| 1              | 5              | 1 | 0 | 1 | 0 | 1 |
| 4              | 5              | 0 | 0 | 0 | 0 | 0 |
| 4              | 5              | 0 | 0 | 0 | 0 | 0 |
| 4              | 5              | 0 | 0 | 0 | 0 | 0 |
| 4 0            | 5 0            | 1 | 0 | 0 | 0 | 0 |
| 4              | 5              | 1 | 0 | 0 | 0 | 0 |
| 1              | 5              | 1 | 0 | 0 | 0 | 0 |
| 4              | 5              | 0 | 0 | 0 | 0 | 0 |
| 4              | 5              | 0 | 0 | 0 | 0 | 0 |
| 4              | 1 millet stalk | 0 | 0 | 0 | 0 | 0 |
| 4              | 5              | 0 | 0 | 0 | 0 | 0 |

|        |                |   |   |   |   |   |
|--------|----------------|---|---|---|---|---|
| 4      | 5              | 0 | 0 | 0 | 0 | 0 |
| 4      | 5              | 1 | 0 | 0 | 0 | 0 |
| 4      | 5              | 0 | 0 | 0 | 0 | 0 |
| 4      | 5              | 1 | 0 | 0 | 0 | 0 |
| 4      | 6 millet stalk | 1 | 0 | 0 | 0 | 0 |
| 4      | 5              | 0 | 0 | 0 | 0 | 0 |
| 4      | 5              | 1 | 0 | 0 | 0 | 0 |
| 4      | 5              | 0 | 0 | 0 | 0 | 0 |
| 1      | 3              | 0 | 0 | 1 | 1 | 1 |
| 1      | 2 charcoal     | 1 | 0 | 1 | 1 | 1 |
| 1      | 3              | 1 | 0 | 1 | 1 | 1 |
| 4      | 4              | 0 | 0 | 1 | 0 | 1 |
| 1      | 2              | 1 | 0 | 1 | 0 | 1 |
| 1      | 5              | 0 | 0 | 1 | 1 | 1 |
| 4      | 5              | 0 | 0 | 0 | 0 | 0 |
| 1      | 3              | 1 | 1 | 1 | 1 | 1 |
| 4      | 5              | 0 | 0 | 0 | 0 | 0 |
| 4      | 3              | 1 | 0 | 0 | 0 | 0 |
| 4      | 5              | 1 | 0 | 0 | 0 | 0 |
| 1      | 5              | 1 | 0 | 1 | 0 | 1 |
| 4      | 5              | 0 | 0 | 0 | 0 | 0 |
| 4      | 5              | 0 | 0 | 0 | 0 | 0 |
| 4      | 5              | 0 | 0 | 0 | 0 | 0 |
| 4      | 5              | 0 | 0 | 0 | 0 | 0 |
| 4      | 5              | 1 | 0 | 0 | 0 | 0 |
| 4      | 5              | 1 | 0 | 0 | 0 | 0 |
| 4      | 5              | 0 | 0 | 0 | 0 | 0 |
| 4 0    | 5 0            | 0 | 0 | 0 | 0 | 0 |
| 4      | 5              | 0 | 0 | 0 | 0 | 0 |
| 4      | 5              | 0 | 0 | 0 | 0 | 0 |
| 4      | 5              | 0 | 0 | 0 | 0 | 0 |
| 4 0    | 3 firewood     | 0 | 0 | 0 | 0 | 0 |
| 4      | 5              | 0 | 0 | 0 | 0 | 0 |
| 4      | 5              | 1 | 0 | 0 | 1 | 1 |
| 5 lamp | 3              | 1 | 0 | 1 | 0 | 1 |
| 4      | 5              | 0 | 0 | 0 | 0 | 0 |
| 1      | 3              | 1 | 0 | 1 | 1 | 0 |
| 1      | 3 1            | 1 | 1 | 1 | 1 | 1 |
| 3      | 3              | 1 | 0 | 0 | 0 | 0 |
| 1      | 3              | 1 | 0 | 1 | 1 | 1 |
| 1      | 2              | 1 | 0 | 1 | 1 | 1 |
| 4      | 5              | 0 | 0 | 0 | 0 | 0 |
| 1      | 3              | 1 | 0 | 1 | 1 | 1 |
| 3      | 3              | 0 | 0 | 0 | 0 | 0 |
| 4      | 5              | 1 | 0 | 0 | 0 | 0 |
| 4      | 5              | 1 | 0 | 0 | 0 | 0 |

|        |            |   |   |   |   |   |
|--------|------------|---|---|---|---|---|
| 1      | 3          | 1 | 1 | 1 | 0 | 1 |
| 4      | 5          | 0 | 0 | 0 | 0 | 0 |
| 1      | 3          | 1 | 0 | 1 | 1 | 1 |
| 1      | 3          | 1 | 0 | 1 | 1 | 1 |
| 4      | 3          | 1 | 0 | 0 | 0 | 0 |
| 3      | 3          | 0 | 0 | 0 | 0 | 0 |
| 1      | 5          | 1 | 0 | 1 | 0 | 1 |
| 1      | 3          | 1 | 0 | 0 | 0 | 0 |
| 1      | 3          | 1 | 0 | 1 | 1 | 1 |
| 4      | 5          | 1 | 0 | 0 | 0 | 0 |
| 1      | 5          | 1 | 0 | 1 | 1 | 1 |
| 4      | 5          | 0 | 0 | 0 | 0 | 0 |
| 4      | 5          | 1 | 0 | 0 | 0 | 0 |
| 4      | 3 Firewood | 1 | 0 | 0 | 0 | 0 |
| 1 lamp | 5          | 0 | 0 | 0 | 0 | 0 |
| 1      | 3 firewood | 1 | 0 | 1 | 1 | 1 |
| 1 Lamp | 2          | 0 | 0 | 1 | 1 | 1 |
| 4 Lamp | 5          | 1 | 0 | 0 | 0 | 0 |
| 1      | 5          | 1 | 0 | 1 | 1 | 0 |
| 4      | 3          | 1 | 0 | 0 | 0 | 0 |
| 4      | 5          | 1 | 0 | 0 | 0 | 0 |
| 1      | 3          | 1 | 1 | 1 | 1 | 1 |
| 1      | 3          | 1 | 1 | 1 | 1 | 1 |
| 4      | 3 firewood | 1 | 0 | 1 | 0 | 1 |
| 4      | 5          | 1 | 0 | 0 | 0 | 0 |
| 4      | 5          | 0 | 0 | 0 | 0 | 0 |
| 4      | 5          | 1 | 0 | 0 | 0 | 0 |
| 4      | 5          | 1 | 0 | 0 | 0 | 0 |
| 1      | 2 Charcoal | 1 | 0 | 1 | 1 | 1 |
| 1      | 3          | 0 | 1 | 0 | 0 | 0 |
| 1      | 3          | 1 | 0 | 1 | 1 | 1 |
| 1      | 3          | 1 | 0 | 1 | 1 | 1 |
| 1 0    | 2 0        | 1 | 1 | 1 | 1 | 1 |
| 1 0    | 3 0        | 1 | 0 | 1 | 1 | 1 |
| 4      | 5 0        | 1 | 0 | 0 | 0 | 0 |
| 4      | 5          | 0 | 0 | 0 | 0 | 0 |
| 4 0    | 5 0        | 1 | 0 | 0 | 0 | 0 |
| 4      | 5 0        | 1 | 0 | 0 | 0 | 0 |
| 4 0    | 5 0        | 1 | 0 | 0 | 0 | 0 |
| 4 0    | 5 0        | 1 | 0 | 0 | 0 | 0 |
| 3      | 5 0        | 1 | 0 | 0 | 0 | 0 |
| 1 0    | 3 0        | 1 | 0 | 1 | 1 | 1 |
| 1 0    | 3 0        | 0 | 0 | 1 | 1 | 1 |
| 4 0    | 5 0        | 1 | 0 | 0 | 0 | 0 |
| 5 0    | 5          | 1 | 0 | 1 | 0 | 1 |
| 1 0    | 3 firewood | 1 | 0 | 0 | 0 | 0 |
| 3 0    | 5          | 1 | 0 | 0 | 0 | 0 |

|               |            |   |   |   |   |   |
|---------------|------------|---|---|---|---|---|
| 3             | 5          | 0 | 0 | 0 | 0 | 0 |
| 4             | 5          | 1 | 0 | 0 | 0 | 0 |
| 1             | 5          | 1 | 0 | 1 | 1 | 1 |
| 4             | 3 0        | 1 | 0 | 0 | 0 | 0 |
| 1             | 3          | 0 | 0 | 0 | 0 | 0 |
| 1             | 5          | 0 | 0 | 0 | 0 | 0 |
| 1 0           | 2 0        | 1 | 1 | 1 | 1 | 1 |
| 1 0           | 3 0        | 1 | 1 | 1 | 1 | 1 |
| 4 0           | 5 0        | 1 | 0 | 0 | 0 | 0 |
| 1 0           | 5 0        | 1 | 0 | 0 | 0 | 0 |
| 1 0           | 3 0        | 1 | 0 | 0 | 1 | 0 |
| 1 0           | 5 0        | 1 | 1 | 1 | 1 | 1 |
| 4 0           | 5 0        | 0 | 0 | 0 | 0 | 0 |
| 2 torch light | 3 firewood | 1 | 0 | 0 | 0 | 0 |
| 4 0           | 5 0        | 1 | 0 | 0 | 0 | 0 |
| 4 0           | 5 0        | 1 | 0 | 1 | 0 | 1 |
| 1 0           | 3 firewood | 1 | 0 | 1 | 0 | 0 |
| 1 0           | 5 0        | 1 | 0 | 1 | 1 | 1 |
| 4 0           | 5 0        | 1 | 0 | 0 | 0 | 0 |
| 4             | 5          | 0 | 0 | 0 | 0 | 0 |
| 4 0           | 5 0        | 1 | 0 | 0 | 0 | 0 |
| 1             | 3          | 1 | 1 | 1 | 0 | 1 |
| 1             | 3          | 1 | 0 | 1 | 1 | 1 |
| 1             | 3          | 0 | 0 | 1 | 1 | 1 |
| 1             | 3          | 1 | 0 | 1 | 0 | 1 |
| 1             | 2 Charcoal | 1 | 1 | 1 | 1 | 1 |
| 4 Lamp        | 3 firewood | 1 | 0 | 0 | 0 | 0 |
| 1             | 5          | 1 | 0 | 1 | 1 | 1 |
| 1             | 3          | 1 | 0 | 1 | 1 | 1 |
| 1             | 2          | 1 | 1 | 1 | 1 | 1 |
| 1             | 3          | 1 | 0 | 1 | 1 | 1 |
| 1             | 2 Charcoal | 1 | 0 | 1 | 1 | 1 |
| 4             | 5          | 1 | 1 | 0 | 1 | 1 |
| 5             | 3 firewood | 1 | 0 | 0 | 0 | 0 |
| 1             | 2 Charcoal | 1 | 0 | 1 | 1 | 1 |
| 1             | 2 Charcoal | 1 | 0 | 1 | 0 | 1 |
| 1             | 2          | 1 | 1 | 1 | 1 | 1 |
| 1             | 2 charcoal | 1 | 1 | 1 | 1 | 1 |
| 1             | 3          | 1 | 1 | 1 | 1 | 1 |
| 1             | 2 CHARCOAL | 1 | 0 | 1 | 1 | 1 |
| 1 Tough ligh  | 5          | 0 | 0 | 0 | 0 | 0 |
| 1             | 2 charcoal | 1 | 1 | 1 | 1 | 1 |
| 1             | 2 charcoal | 1 | 0 | 1 | 1 | 1 |
| 1             | 3          | 0 | 0 | 1 | 1 | 1 |
| 1             | 5          | 0 | 0 | 0 | 0 | 0 |
| 1             | 2 charcoal | 1 | 0 | 1 | 1 | 1 |
| 1             | 2 Charcoal | 1 | 1 | 1 | 1 | 1 |

|               |            |   |   |   |   |   |
|---------------|------------|---|---|---|---|---|
| 1             | 2 charcoal | 1 | 0 | 1 | 1 | 1 |
| 1             | 3          | 1 | 0 | 0 | 1 | 0 |
| 1             | 2 Charcoal | 1 | 0 | 1 | 1 | 1 |
| 4             | 3          | 0 | 0 | 0 | 0 | 0 |
| 1             | 2 Charcoal | 1 | 0 | 1 | 1 | 1 |
| 1             | 2 charcoal | 1 | 1 | 1 | 1 | 1 |
| 4             | 5          | 0 | 0 | 0 | 0 | 0 |
| 1 Touch light | 5          | 1 | 0 | 0 | 0 | 0 |
| 1             | 3          | 1 | 0 | 0 | 0 | 0 |
| 4 0           | 3 firewood | 0 | 0 | 0 | 0 | 0 |
| 1 0           | 5 0        | 1 | 0 | 0 | 1 | 0 |
| 1 torch light | 5 0        | 1 | 0 | 1 | 1 | 1 |
| 4 0           | 5          | 1 | 0 | 0 | 0 | 0 |
| 5 0           | 5 0        | 0 | 0 | 0 | 0 | 0 |
| 1 0           | 5 0        | 0 | 1 | 0 | 0 | 0 |
| 1 0           | 5 0        | 1 | 0 | 1 | 0 | 1 |
| 4 0           | 5 0        | 0 | 0 | 0 | 0 | 0 |
| 4 0           | 5          | 1 | 0 | 0 | 0 | 0 |
| 5 0           | 5 0        | 1 | 1 | 1 | 1 | 1 |
| 4 0           | 5 0        | 0 | 0 | 0 | 0 | 0 |
| 4 0           | 5 0        | 1 | 0 | 0 | 0 | 0 |
| 4 0           | 5 0        | 1 | 0 | 0 | 0 | 0 |
| 4 0           | 5 0        | 0 | 0 | 0 | 0 | 0 |
| 1 0           | 5 0        | 1 | 0 | 1 | 0 | 1 |
| 1 0           | 3 0        | 1 | 1 | 1 | 1 | 0 |
| 1 0           | 5 0        | 0 | 0 | 1 | 1 | 1 |
| 4 0           | 5 0        | 1 | 0 | 1 | 0 | 1 |
| 1 0           | 3 0        | 1 | 0 | 1 | 1 | 1 |
| 4 0           | 5 0        | 0 | 0 | 0 | 0 | 0 |
| 1 0           | 2 0        | 1 | 1 | 1 | 1 | 1 |
| 1 0           | 5 0        | 1 | 0 | 1 | 0 | 1 |
| 4 0           | 5 0        | 0 | 0 | 0 | 0 | 0 |
| 4 0           | 5 0        | 0 | 0 | 0 | 0 | 0 |
| 4 0           | 5 0        | 1 | 0 | 0 | 0 | 0 |
| 3 torch light | 5 0        | 0 | 0 | 1 | 0 | 0 |
| 4 0           | 5 0        | 0 | 0 | 0 | 0 | 0 |
| 4 0           | 3 0        | 0 | 0 | 0 | 0 | 0 |
| 4 0           | 5 0        | 0 | 0 | 0 | 1 | 0 |
| 4 0           | 5 0        | 0 | 0 | 0 | 0 | 0 |
| 4             | 5          | 1 | 0 | 0 | 0 | 0 |
| 4 0           | 5 0        | 1 | 0 | 0 | 0 | 0 |
| 4 0           | 5          | 0 | 0 | 0 | 0 | 0 |
| 4 0           | 5 0        | 1 | 0 | 0 | 0 | 0 |
| 4 0           | 5 0        | 0 | 0 | 0 | 0 | 0 |
| 4 0           | 5 0        | 0 | 0 | 0 | 0 | 0 |
| 4 0           | 3 0        | 1 | 0 | 0 | 0 | 0 |
| 4             | 5          | 1 | 0 | 0 | 0 | 0 |

|     |            |   |   |   |   |   |
|-----|------------|---|---|---|---|---|
| 4   | 5          | 0 | 0 | 0 | 0 | 0 |
| 4 0 | 5 0        | 0 | 0 | 0 | 0 | 0 |
| 4   | 5 0        | 0 | 0 | 0 | 0 | 0 |
| 4   | 5 0        | 1 | 0 | 0 | 0 | 0 |
| 2 0 | 3 firewood | 1 | 0 | 1 | 1 | 1 |
| 4   | 5          | 0 | 0 | 0 | 0 | 0 |
| 4   | 5          | 1 | 0 | 0 | 0 | 0 |
| 4   | 5          | 1 | 0 | 0 | 0 | 0 |
| 4   | 5          | 1 | 0 | 0 | 0 | 0 |
| 4 0 | 5 chacoal  | 1 | 0 | 0 | 0 | 0 |
| 4   | 5          | 0 | 0 | 0 | 0 | 0 |
| 4 0 | 5 0        | 1 | 0 | 0 | 0 | 0 |
| 1   | 5          | 1 | 0 | 1 | 1 | 1 |
| 4 0 | 5 0        | 0 | 0 | 1 | 0 | 1 |
| 1   | 5          | 0 | 0 | 1 | 0 | 1 |
| 4   | 5          | 0 | 0 | 0 | 0 | 0 |
| 4   | 5          | 1 | 1 | 1 | 1 | 0 |
| 4   | 5          | 1 | 0 | 0 | 0 | 0 |
| 4   | 5          | 1 | 0 | 0 | 0 | 0 |
| 4   | 5          | 0 | 0 | 0 | 0 | 0 |
| 4   | 5          | 0 | 0 | 0 | 0 | 0 |
| 4   | 5          | 0 | 0 | 0 | 0 | 0 |
| 4 0 | 5 0        | 0 | 0 | 0 | 0 | 0 |
| 4   | 5          | 0 | 0 | 0 | 0 | 0 |
| 4   | 5          | 1 | 0 | 0 | 0 | 0 |
| 4   | 5          | 1 | 0 | 1 | 0 | 1 |
| 4 0 | 5 0        | 1 | 0 | 0 | 0 | 0 |
| 4   | 5          | 0 | 0 | 1 | 0 | 1 |
| 4   | 5          | 1 | 0 | 0 | 0 | 0 |
| 4   | 5          | 1 | 0 | 0 | 1 | 0 |
| 4 0 | 5 0        | 0 | 0 | 0 | 0 | 0 |
| 4 0 | 5 0        | 1 | 0 | 0 | 0 | 0 |
| 4 0 | 5 0        | 1 | 0 | 0 | 0 | 0 |
| 4 0 | 5 0        | 0 | 0 | 0 | 0 | 0 |
| 4 0 | 5 0        | 0 | 0 | 1 | 0 | 1 |
| 1 0 | 5 0        | 0 | 0 | 0 | 0 | 0 |
| 1 0 | 5 0        | 0 | 0 | 0 | 0 | 0 |
| 1 0 | 5 0        | 0 | 0 | 0 | 0 | 0 |
| 4 0 | 5 0        | 0 | 0 | 0 | 0 | 0 |
| 4 0 | 5 0        | 0 | 0 | 0 | 0 | 0 |
| 4 0 | 5 0        | 0 | 0 | 0 | 0 | 0 |
| 4 0 | 5 0        | 0 | 0 | 0 | 0 | 0 |
| 4 0 | 5 0        | 0 | 0 | 0 | 0 | 0 |
| 4 0 | 5 0        | 0 | 0 | 0 | 0 | 0 |
| 4 5 | 5          | 1 | 0 | 0 | 0 | 0 |
| 4 0 | 5 0        | 0 | 0 | 1 | 0 | 0 |
| 4 0 | 5 0        | 0 | 0 | 0 | 0 | 0 |
| 4 0 | 5 0        | 0 | 0 | 0 | 0 | 0 |

|               |              |   |   |   |   |   |
|---------------|--------------|---|---|---|---|---|
| 4 0           | 5 0          | 1 | 0 | 0 | 0 | 0 |
| 4 0           | 5 0          | 1 | 0 | 0 | 0 | 0 |
| 4 0           | 5 0          | 0 | 0 | 0 | 0 | 0 |
| 4 0           | 5 0          | 1 | 0 | 0 | 0 | 0 |
| 4 0           | 5 0          | 1 | 0 | 0 | 0 | 0 |
| 4 0           | 5 0          | 0 | 0 | 0 | 0 | 0 |
| 4 0           | 5 0          | 0 | 0 | 0 | 0 | 0 |
| 4 0           | 5 0          | 0 | 0 | 0 | 0 | 0 |
| 4 0           | 5 0          | 1 | 0 | 0 | 0 | 0 |
| 4 0           | 5 0          | 1 | 0 | 0 | 0 | 0 |
| 4 0           | 5 0          | 1 | 0 | 1 | 0 | 1 |
| 4 0           | 5 0          | 1 | 1 | 0 | 1 | 0 |
| 4 0           | 5 0          | 1 | 0 | 0 | 0 | 0 |
| 4 0           | 5 0          | 1 | 0 | 0 | 0 | 0 |
| 4 0           | 5 0          | 1 | 0 | 1 | 0 | 1 |
| 4 0           | 5 0          | 1 | 0 | 0 | 0 | 0 |
| 4 0           | 5 0          | 1 | 0 | 0 | 1 | 0 |
| 4 0           | 5 0          | 0 | 0 | 0 | 0 | 0 |
| 4             | 5 0          | 0 | 0 | 0 | 0 | 0 |
| 4             | 6 Corn stock | 0 | 0 | 1 | 0 | 1 |
| 4             | 5            | 1 | 0 | 0 | 0 | 0 |
| 4             | 5            | 0 | 0 | 0 | 0 | 0 |
| 4             | 5            | 1 | 0 | 0 | 0 | 0 |
| 4             | 5            | 1 | 0 | 0 | 0 | 0 |
| 4             | 5            | 0 | 0 | 0 | 1 | 0 |
| 1             | 5            | 1 | 0 | 1 | 1 | 1 |
| 4 Lamp        | 5            | 1 | 0 | 0 | 0 | 0 |
| 4             | 5            | 1 | 0 | 0 | 0 | 0 |
| 1             | 5            | 1 | 0 | 1 | 0 | 1 |
| 1             | 2 Charcoal   | 1 | 0 | 1 | 1 | 1 |
| 1 Tough light | 2 charcoal   | 0 | 1 | 1 | 1 | 1 |
| 1 lamp        | 3            | 0 | 0 | 1 | 1 | 1 |
| 1             | 5            | 0 | 0 | 1 | 0 | 1 |
| 1             | 2            | 0 | 0 | 1 | 1 | 1 |
| 4             | 2            | 1 | 0 | 0 | 0 | 0 |
| 4             | 5            | 1 | 0 | 0 | 0 | 0 |
| 1             | 2 1          | 1 | 1 | 1 | 1 | 1 |
| 4             | 2            | 1 | 1 | 1 | 1 | 1 |
| 1             | 5            | 0 | 0 | 0 | 0 | 0 |
| 1             | 1            | 1 | 0 | 1 | 1 | 1 |
| 1             | 2            | 1 | 0 | 1 | 1 | 1 |
| 1 solar       | 2            | 1 | 1 | 1 | 1 | 1 |
| 1             | 5            | 0 | 1 | 1 | 1 | 1 |
| 1             | 3            | 1 | 1 | 1 | 1 | 1 |
| 4             | 5            | 0 | 0 | 0 | 0 | 0 |
| 4             | 3            | 1 | 0 | 0 | 0 | 0 |
| 1             | 5            | 1 | 0 | 1 | 0 | 1 |

|         |   |   |   |   |   |   |
|---------|---|---|---|---|---|---|
| 1 solar | 2 | 1 | 1 | 1 | 1 | 1 |
| 4       | 2 | 1 | 1 | 1 | 1 | 1 |
| 4       | 2 | 1 | 1 | 1 | 1 | 1 |
| 4       | 1 | 0 | 1 | 1 | 1 | 1 |
| 1       | 2 | 1 | 0 | 1 | 1 | 1 |
| 1       | 2 | 1 | 1 | 1 | 1 | 1 |
| 1       | 5 | 1 | 0 | 1 | 0 | 1 |
| 1       | 3 | 1 | 0 | 1 | 0 | 0 |
| 1       | 2 | 1 | 1 | 1 | 1 | 1 |
| 1       | 1 | 0 | 0 | 1 | 1 | 1 |
| 4       | 5 | 0 | 1 | 1 | 1 | 1 |
| 1       | 2 | 1 | 1 | 1 | 1 | 1 |
| 1       | 2 | 0 | 0 | 1 | 1 | 1 |
| 4       | 5 | 1 | 0 | 0 | 0 | 0 |



| Mobile | pho | Sewing | Mac | Bicycle | Mattress | Motrocycle | Refrigerato | Animal | drav | DVD | VCD | Car |
|--------|-----|--------|-----|---------|----------|------------|-------------|--------|------|-----|-----|-----|
| 0      | 0   | 0      | 1   | 0       | 0        | 0          | 0           | 0      | 0    | 0   | 0   | 0   |
| 1      | 0   | 1      | 0   | 1       | 0        | 1          | 0           | 0      | 0    | 0   | 0   | 0   |
| 1      | 0   | 1      | 1   | 1       | 0        | 1          | 0           | 0      | 0    | 0   | 0   | 0   |
| 1      | 0   | 0      | 0   | 0       | 0        | 0          | 0           | 0      | 0    | 0   | 0   | 1   |
| 1      | 0   | 0      | 1   | 1       | 0        | 0          | 0           | 0      | 0    | 0   | 0   | 0   |
| 1      | 1   | 1      | 1   | 1       | 0        | 0          | 0           | 0      | 0    | 0   | 0   | 0   |
| 1      | 0   | 1      | 1   | 1       | 1        | 1          | 1           | 0      | 0    | 0   | 0   | 0   |
| 1      | 0   | 1      | 1   | 1       | 1        | 1          | 1           | 0      | 1    | 0   | 1   | 0   |
| 0      | 0   | 0      | 0   | 1       | 0        | 0          | 1           | 0      | 0    | 1   | 1   | 0   |
| 1      | 0   | 1      | 1   | 1       | 0        | 0          | 0           | 0      | 0    | 0   | 0   | 0   |
| 1      | 0   | 1      | 1   | 1       | 1        | 1          | 1           | 0      | 0    | 0   | 0   | 0   |
| 1      | 0   | 1      | 1   | 1       | 1        | 1          | 0           | 1      | 0    | 1   | 0   | 0   |
| 0      | 0   | 1      | 1   | 0       | 0        | 0          | 0           | 0      | 0    | 0   | 0   | 0   |
| 1      | 0   | 0      | 1   | 1       | 0        | 0          | 0           | 0      | 0    | 0   | 0   | 0   |
| 1      | 0   | 1      | 1   | 1       | 1        | 1          | 1           | 1      | 1    | 1   | 1   | 1   |
| 1      | 0   | 1      | 1   | 1       | 1        | 1          | 1           | 1      | 1    | 1   | 1   | 1   |
| 0      | 0   | 0      | 0   | 0       | 0        | 0          | 0           | 0      | 1    | 0   | 0   | 0   |
| 1      | 1   | 1      | 1   | 1       | 1        | 1          | 0           | 0      | 1    | 0   | 0   | 0   |
| 1      | 0   | 0      | 0   | 1       | 0        | 0          | 0           | 0      | 0    | 0   | 0   | 0   |
| 1      | 1   | 1      | 1   | 0       | 1        | 0          | 0           | 0      | 0    | 0   | 0   | 0   |
| 0      | 0   | 1      | 0   | 0       | 0        | 0          | 0           | 0      | 0    | 0   | 0   | 0   |
| 1      | 0   | 1      | 1   | 1       | 0        | 0          | 0           | 0      | 0    | 0   | 0   | 0   |
| 1      | 1   | 1      | 1   | 1       | 1        | 1          | 1           | 1      | 1    | 1   | 1   | 0   |
| 1      | 1   | 1      | 1   | 1       | 0        | 0          | 0           | 0      | 0    | 0   | 0   | 0   |
| 1      | 1   | 1      | 1   | 0       | 0        | 0          | 1           | 0      | 0    | 1   | 0   | 0   |
| 1      | 0   | 1      | 1   | 1       | 1        | 1          | 0           | 0      | 0    | 0   | 0   | 0   |
| 1      | 0   | 0      | 0   | 0       | 0        | 0          | 0           | 0      | 0    | 0   | 0   | 0   |
| 1      | 0   | 0      | 0   | 0       | 0        | 0          | 0           | 0      | 0    | 0   | 0   | 0   |
| 1      | 0   | 1      | 1   | 1       | 1        | 0          | 0           | 0      | 0    | 0   | 0   | 0   |
| 1      | 1   | 1      | 1   | 1       | 1        | 1          | 0           | 0      | 0    | 0   | 0   | 0   |
| 0      | 0   | 1      | 0   | 0       | 0        | 0          | 0           | 0      | 0    | 0   | 0   | 0   |
| 1      | 0   | 1      | 0   | 0       | 1        | 0          | 0           | 1      | 0    | 0   | 0   | 0   |
| 0      | 0   | 1      | 0   | 0       | 0        | 0          | 0           | 0      | 1    | 0   | 0   | 0   |
| 1      | 0   | 1      | 0   | 0       | 0        | 0          | 0           | 0      | 0    | 0   | 0   | 0   |
| 1      | 0   | 0      | 0   | 0       | 0        | 0          | 0           | 0      | 0    | 0   | 0   | 0   |
| 1      | 0   | 1      | 1   | 1       | 1        | 0          | 0           | 0      | 0    | 0   | 0   | 0   |
| 1      | 1   | 1      | 1   | 1       | 0        | 0          | 0           | 0      | 0    | 0   | 0   | 0   |
| 1      | 1   | 1      | 1   | 1       | 1        | 1          | 0           | 0      | 0    | 0   | 0   | 0   |
| 1      | 1   | 1      | 1   | 0       | 0        | 0          | 0           | 1      | 1    | 1   | 1   | 0   |
| 1      | 0   | 1      | 1   | 1       | 0        | 0          | 0           | 1      | 0    | 0   | 0   | 0   |
| 1      | 1   | 1      | 1   | 1       | 0        | 0          | 0           | 0      | 0    | 0   | 0   | 0   |
| 1      | 0   | 1      | 0   | 0       | 0        | 1          | 0           | 0      | 0    | 0   | 0   | 0   |
| 1      | 0   | 1      | 0   | 0       | 0        | 1          | 0           | 0      | 0    | 0   | 0   | 0   |
| 0      | 0   | 1      | 0   | 0       | 0        | 0          | 0           | 1      | 0    | 0   | 0   | 0   |
| 1      | 0   | 1      | 0   | 0       | 1        | 0          | 0           | 1      | 0    | 0   | 0   | 0   |

|   |   |   |   |   |   |   |   |   |
|---|---|---|---|---|---|---|---|---|
| 0 | 0 | 1 | 0 | 0 | 0 | 1 | 0 | 0 |
| 1 | 0 | 1 | 0 | 0 | 0 | 0 | 0 | 0 |
| 1 | 0 | 1 | 0 | 0 | 0 | 0 | 0 | 0 |
| 1 | 0 | 1 | 0 | 0 | 0 | 0 | 0 | 0 |
| 0 | 0 | 1 | 0 | 0 | 0 | 0 | 0 | 0 |
| 1 | 1 | 1 | 1 | 1 | 1 | 1 | 1 | 1 |
| 1 | 0 | 1 | 0 | 0 | 0 | 0 | 0 | 0 |
| 1 | 0 | 1 | 0 | 0 | 0 | 0 | 0 | 0 |
| 0 | 0 | 0 | 1 | 0 | 0 | 0 | 0 | 0 |
| 0 | 0 | 1 | 0 | 0 | 0 | 0 | 0 | 0 |
| 0 | 0 | 1 | 1 | 0 | 0 | 0 | 0 | 0 |
| 1 | 0 | 1 | 1 | 0 | 0 | 0 | 0 | 0 |
| 1 | 0 | 1 | 0 | 0 | 0 | 0 | 0 | 0 |
| 1 | 0 | 1 | 0 | 1 | 1 | 1 | 1 | 0 |
| 1 | 0 | 1 | 1 | 0 | 0 | 0 | 0 | 0 |
| 0 | 0 | 1 | 0 | 0 | 0 | 1 | 0 | 0 |
| 0 | 1 | 0 | 1 | 0 | 0 | 1 | 0 | 0 |
| 0 | 0 | 1 | 1 | 0 | 0 | 0 | 0 | 0 |
| 1 | 0 | 0 | 0 | 0 | 0 | 0 | 0 | 0 |
| 0 | 0 | 1 | 1 | 0 | 0 | 0 | 1 | 0 |
| 0 | 0 | 1 | 1 | 0 | 0 | 1 | 0 | 0 |
| 0 | 0 | 1 | 1 | 0 | 0 | 0 | 0 | 0 |
| 1 | 0 | 1 | 1 | 0 | 0 | 0 | 0 | 0 |
| 0 | 0 | 1 | 0 | 0 | 0 | 1 | 0 | 0 |
| 0 | 0 | 1 | 1 | 1 | 0 | 0 | 0 | 0 |
| 1 | 1 | 1 | 1 | 0 | 0 | 0 | 0 | 0 |
| 1 | 0 | 1 | 0 | 0 | 0 | 0 | 0 | 0 |
| 1 | 0 | 1 | 1 | 0 | 0 | 0 | 0 | 0 |
| 1 | 0 | 1 | 1 | 0 | 0 | 0 | 0 | 0 |
| 0 | 0 | 1 | 1 | 0 | 0 | 0 | 0 | 0 |
| 1 | 0 | 1 | 0 | 0 | 0 | 0 | 0 | 0 |
| 0 | 0 | 1 | 1 | 1 | 0 | 1 | 0 | 0 |
| 1 | 0 | 1 | 1 | 1 | 0 | 0 | 0 | 0 |
| 0 | 0 | 0 | 1 | 0 | 0 | 0 | 0 | 0 |
| 0 | 0 | 1 | 0 | 0 | 0 | 0 | 0 | 0 |
| 1 | 0 | 1 | 1 | 1 | 0 | 0 | 0 | 0 |
| 1 | 0 | 0 | 1 | 1 | 1 | 0 | 0 | 0 |
| 1 | 0 | 1 | 1 | 0 | 0 | 0 | 0 | 0 |
| 1 | 0 | 1 | 0 | 1 | 0 | 0 | 0 | 0 |
| 1 | 0 | 1 | 1 | 0 | 0 | 0 | 0 | 0 |
| 1 | 1 | 1 | 1 | 1 | 0 | 0 | 0 | 0 |
| 1 | 0 | 1 | 1 | 0 | 0 | 0 | 0 | 0 |
| 0 | 0 | 1 | 1 | 0 | 0 | 1 | 0 | 0 |
| 1 | 0 | 1 | 0 | 0 | 0 | 0 | 0 | 0 |
| 1 | 0 | 1 | 0 | 0 | 0 | 0 | 0 | 0 |
| 1 | 0 | 0 | 0 | 1 | 0 | 0 | 0 | 1 |

|   |   |   |   |   |   |   |   |   |
|---|---|---|---|---|---|---|---|---|
| 1 | 0 | 1 | 0 | 1 | 0 | 1 | 0 | 0 |
| 1 | 0 | 1 | 0 | 0 | 0 | 1 | 0 | 0 |
| 1 | 0 | 1 | 1 | 0 | 0 | 0 | 0 | 0 |
| 0 | 0 | 0 | 0 | 0 | 0 | 0 | 0 | 0 |
| 0 | 0 | 1 | 1 | 0 | 1 | 0 | 0 | 0 |
| 0 | 0 | 1 | 0 | 0 | 0 | 0 | 0 | 0 |
| 1 | 1 | 1 | 1 | 0 | 0 | 0 | 0 | 0 |
| 0 | 0 | 1 | 0 | 0 | 0 | 0 | 0 | 0 |
| 1 | 0 | 0 | 0 | 0 | 0 | 0 | 0 | 0 |
| 1 | 0 | 1 | 0 | 0 | 0 | 0 | 0 | 0 |
| 0 | 0 | 1 | 1 | 1 | 0 | 0 | 0 | 0 |
| 1 | 0 | 0 | 0 | 0 | 0 | 0 | 0 | 0 |
| 0 | 0 | 1 | 0 | 0 | 0 | 0 | 0 | 0 |
| 1 | 0 | 1 | 0 | 0 | 0 | 0 | 0 | 0 |
| 1 | 1 | 1 | 1 | 0 | 0 | 0 | 0 | 0 |
| 1 | 0 | 1 | 1 | 1 | 0 | 0 | 0 | 0 |
| 0 | 0 | 1 | 0 | 0 | 0 | 0 | 0 | 0 |
| 1 | 0 | 1 | 1 | 0 | 0 | 0 | 0 | 0 |
| 1 | 0 | 1 | 1 | 0 | 0 | 0 | 0 | 0 |
| 0 | 0 | 1 | 1 | 0 | 0 | 0 | 0 | 0 |
| 1 | 0 | 1 | 1 | 0 | 0 | 0 | 0 | 0 |
| 0 | 0 | 1 | 1 | 0 | 0 | 0 | 0 | 0 |
| 1 | 0 | 1 | 0 | 1 | 0 | 1 | 0 | 0 |
| 0 | 0 | 1 | 1 | 0 | 1 | 0 | 0 | 0 |
| 1 | 1 | 1 | 1 | 1 | 0 | 0 | 0 | 1 |
| 0 | 0 | 1 | 0 | 0 | 0 | 0 | 0 | 0 |
| 1 | 0 | 1 | 1 | 0 | 1 | 0 | 0 | 0 |
| 1 | 0 | 0 | 0 | 0 | 0 | 0 | 0 | 0 |
| 1 | 0 | 0 | 1 | 0 | 0 | 0 | 0 | 0 |
| 1 | 0 | 1 | 1 | 0 | 0 | 1 | 0 | 0 |
| 1 | 0 | 0 | 0 | 0 | 0 | 0 | 0 | 0 |
| 1 | 0 | 1 | 1 | 0 | 0 | 0 | 0 | 0 |
| 1 | 0 | 1 | 1 | 1 | 0 | 0 | 1 | 0 |
| 1 | 0 | 1 | 0 | 0 | 0 | 0 | 0 | 0 |
| 1 | 0 | 0 | 1 | 0 | 0 | 0 | 0 | 0 |
| 1 | 0 | 1 | 1 | 1 | 1 | 0 | 0 | 1 |
| 1 | 0 | 0 | 0 | 0 | 0 | 0 | 0 | 0 |
| 1 | 0 | 0 | 1 | 1 | 0 | 0 | 0 | 0 |
| 1 | 1 | 1 | 1 | 1 | 0 | 1 | 0 | 0 |
| 1 | 0 | 1 | 1 | 0 | 0 | 0 | 0 | 0 |
| 1 | 0 | 1 | 0 | 0 | 0 | 0 | 0 | 0 |
| 1 | 0 | 1 | 0 | 0 | 0 | 0 | 0 | 0 |
| 1 | 0 | 1 | 0 | 0 | 0 | 0 | 0 | 0 |
| 1 | 0 | 1 | 1 | 0 | 0 | 1 | 0 | 0 |
| 1 | 0 | 1 | 1 | 1 | 0 | 0 | 0 | 0 |
| 1 | 0 | 1 | 0 | 0 | 0 | 0 | 0 | 0 |
| 1 | 0 | 1 | 1 | 0 | 0 | 0 | 0 | 0 |
| 1 | 0 | 1 | 1 | 1 | 0 | 1 | 0 | 0 |
| 1 | 0 | 1 | 0 | 0 | 0 | 0 | 0 | 0 |
| 1 | 0 | 1 | 1 | 0 | 0 | 0 | 0 | 0 |
| 1 | 0 | 1 | 1 | 0 | 0 | 0 | 0 | 0 |

|   |   |   |   |   |   |   |   |   |
|---|---|---|---|---|---|---|---|---|
| 1 | 0 | 1 | 1 | 0 | 0 | 0 | 0 | 0 |
| 0 | 0 | 0 | 1 | 0 | 1 | 1 | 1 | 0 |
| 1 | 0 | 0 | 0 | 0 | 0 | 0 | 0 | 0 |
| 1 | 1 | 0 | 1 | 0 | 1 | 0 | 1 | 0 |
| 1 | 1 | 0 | 1 | 1 | 1 | 0 | 0 | 0 |
| 1 | 0 | 1 | 1 | 1 | 1 | 0 | 1 | 0 |
| 1 | 0 | 1 | 1 | 0 | 0 | 0 | 0 | 0 |
| 1 | 0 | 1 | 1 | 1 | 0 | 0 | 0 | 0 |
| 1 | 0 | 0 | 1 | 0 | 0 | 0 | 0 | 0 |
| 1 | 0 | 0 | 1 | 1 | 1 | 0 | 1 | 0 |
| 1 | 0 | 1 | 1 | 1 | 1 | 0 | 1 | 0 |
| 1 | 0 | 0 | 1 | 1 | 1 | 1 | 1 | 0 |
| 1 | 0 | 1 | 0 | 1 | 0 | 0 | 0 | 0 |
| 1 | 0 | 1 | 0 | 0 | 0 | 1 | 0 | 0 |
| 1 | 0 | 0 | 0 | 0 | 0 | 0 | 0 | 0 |
| 0 | 0 | 0 | 0 | 0 | 0 | 1 | 0 | 0 |
| 1 | 0 | 1 | 0 | 1 | 1 | 1 | 0 | 0 |
| 1 | 0 | 1 | 1 | 0 | 0 | 0 | 0 | 0 |
| 0 | 0 | 1 | 0 | 0 | 0 | 0 | 0 | 0 |
| 1 | 0 | 1 | 0 | 0 | 0 | 0 | 0 | 0 |
| 0 | 0 | 1 | 1 | 0 | 0 | 0 | 0 | 0 |
| 1 | 0 | 1 | 0 | 0 | 0 | 0 | 0 | 0 |
| 0 | 0 | 0 | 0 | 0 | 0 | 1 | 0 | 0 |
| 1 | 0 | 1 | 0 | 0 | 0 | 0 | 0 | 0 |
| 1 | 0 | 1 | 0 | 1 | 0 | 1 | 0 | 0 |
| 0 | 0 | 1 | 0 | 0 | 0 | 0 | 0 | 0 |
| 1 | 0 | 1 | 0 | 0 | 0 | 0 | 0 | 0 |
| 1 | 0 | 1 | 0 | 0 | 0 | 0 | 0 | 0 |
| 1 | 0 | 1 | 0 | 0 | 0 | 0 | 0 | 0 |
| 0 | 1 | 0 | 1 | 0 | 0 | 0 | 0 | 0 |
| 1 | 0 | 0 | 1 | 0 | 0 | 0 | 0 | 0 |
| 0 | 0 | 0 | 0 | 0 | 0 | 0 | 0 | 0 |
| 0 | 0 | 1 | 1 | 0 | 0 | 0 | 0 | 0 |
| 1 | 0 | 0 | 1 | 0 | 0 | 0 | 0 | 0 |
| 0 | 1 | 0 | 1 | 0 | 0 | 0 | 0 | 0 |
| 1 | 0 | 1 | 1 | 1 | 0 | 0 | 0 | 0 |
| 1 | 1 | 1 | 1 | 0 | 0 | 0 | 0 | 0 |
| 1 | 0 | 1 | 0 | 0 | 0 | 0 | 0 | 0 |
| 0 | 0 | 1 | 1 | 0 | 0 | 0 | 0 | 0 |
| 0 | 0 | 0 | 0 | 0 | 0 | 0 | 0 | 0 |
| 0 | 1 | 0 | 0 | 0 | 0 | 0 | 0 | 0 |
| 1 | 1 | 1 | 0 | 1 | 0 | 1 | 0 | 0 |
| 1 | 0 | 1 | 0 | 0 | 0 | 0 | 0 | 0 |
| 0 | 0 | 1 | 0 | 0 | 0 | 0 | 0 | 0 |



|   |   |   |   |   |   |   |   |   |
|---|---|---|---|---|---|---|---|---|
| 1 | 1 | 0 | 1 | 0 | 0 | 0 | 0 | 0 |
| 1 | 0 | 1 | 1 | 0 | 0 | 0 | 0 | 1 |
| 1 | 0 | 1 | 0 | 0 | 0 | 0 | 0 | 0 |
| 1 | 1 | 1 | 0 | 1 | 0 | 1 | 0 | 0 |
| 0 | 0 | 0 | 0 | 0 | 0 | 0 | 0 | 0 |
| 1 | 1 | 1 | 0 | 1 | 0 | 0 | 0 | 0 |
| 1 | 0 | 0 | 0 | 0 | 0 | 0 | 0 | 0 |
| 1 | 0 | 0 | 0 | 0 | 0 | 0 | 0 | 0 |
| 1 | 0 | 0 | 1 | 1 | 1 | 1 | 1 | 0 |
| 1 | 0 | 1 | 1 | 1 | 1 | 0 | 0 | 0 |
| 1 | 0 | 1 | 1 | 0 | 1 | 0 | 0 | 0 |
| 0 | 0 | 1 | 1 | 1 | 1 | 0 | 0 | 0 |
| 1 | 1 | 1 | 1 | 1 | 1 | 0 | 1 | 1 |
| 1 | 0 | 0 | 1 | 0 | 0 | 0 | 0 | 0 |
| 1 | 1 | 1 | 1 | 1 | 0 | 0 | 0 | 0 |
| 1 | 0 | 1 | 1 | 1 | 1 | 0 | 1 | 0 |
| 0 | 0 | 1 | 0 | 0 | 0 | 0 | 0 | 0 |
| 1 | 0 | 1 | 0 | 1 | 0 | 1 | 0 | 0 |
| 1 | 0 | 1 | 1 | 1 | 0 | 1 | 0 | 0 |
| 1 | 0 | 1 | 1 | 0 | 0 | 0 | 0 | 0 |
| 1 | 0 | 1 | 0 | 0 | 0 | 1 | 0 | 0 |
| 1 | 0 | 0 | 0 | 0 | 0 | 0 | 0 | 0 |
| 1 | 0 | 1 | 0 | 1 | 0 | 1 | 0 | 0 |
| 1 | 0 | 0 | 0 | 0 | 0 | 0 | 0 | 0 |
| 1 | 0 | 1 | 0 | 0 | 0 | 0 | 0 | 0 |
| 0 | 0 | 1 | 1 | 0 | 0 | 0 | 0 | 0 |
| 0 | 0 | 1 | 1 | 0 | 0 | 0 | 0 | 0 |
| 1 | 1 | 1 | 0 | 1 | 0 | 1 | 0 | 0 |
| 1 | 0 | 0 | 0 | 0 | 0 | 0 | 0 | 0 |
| 1 | 0 | 1 | 0 | 0 | 0 | 0 | 0 | 0 |
| 0 | 0 | 1 | 0 | 0 | 0 | 0 | 0 | 0 |
| 1 | 1 | 1 | 1 | 1 | 0 | 0 | 0 | 0 |
| 0 | 0 | 1 | 0 | 0 | 0 | 0 | 0 | 0 |
| 1 | 0 | 1 | 0 | 0 | 0 | 1 | 0 | 0 |
| 0 | 0 | 1 | 1 | 0 | 1 | 0 | 0 | 0 |
| 1 | 0 | 1 | 0 | 1 | 0 | 0 | 0 | 0 |
| 1 | 0 | 1 | 0 | 0 | 0 | 0 | 0 | 0 |
| 1 | 1 | 1 | 1 | 1 | 0 | 0 | 0 | 0 |
| 1 | 0 | 1 | 1 | 1 | 1 | 1 | 1 | 0 |
| 1 | 0 | 1 | 0 | 1 | 0 | 1 | 0 | 0 |
| 1 | 0 | 1 | 1 | 0 | 0 | 0 | 0 | 1 |
| 1 | 0 | 1 | 1 | 0 | 1 | 1 | 1 | 0 |
| 1 | 0 | 1 | 0 | 0 | 0 | 0 | 0 | 0 |
| 1 | 0 | 1 | 1 | 1 | 1 | 0 | 1 | 0 |
| 1 | 0 | 1 | 0 | 1 | 0 | 0 | 0 | 0 |
| 1 | 0 | 1 | 1 | 0 | 0 | 0 | 0 | 0 |
| 0 | 0 | 1 | 0 | 0 | 0 | 0 | 0 | 0 |

|   |   |   |   |   |   |   |   |   |
|---|---|---|---|---|---|---|---|---|
| 1 | 1 | 1 | 1 | 0 | 1 | 1 | 1 | 0 |
| 0 | 0 | 0 | 0 | 0 | 0 | 0 | 0 | 0 |
| 1 | 0 | 1 | 1 | 1 | 1 | 0 | 0 | 0 |
| 1 | 1 | 1 | 1 | 1 | 1 | 1 | 1 | 0 |
| 1 | 0 | 1 | 1 | 1 | 0 | 1 | 0 | 0 |
| 1 | 0 | 1 | 0 | 1 | 0 | 0 | 0 | 0 |
| 1 | 0 | 1 | 0 | 1 | 0 | 1 | 0 | 0 |
| 1 | 0 | 1 | 0 | 0 | 0 | 1 | 0 | 0 |
| 1 | 0 | 1 | 1 | 1 | 1 | 1 | 1 | 0 |
| 1 | 0 | 1 | 0 | 1 | 0 | 1 | 0 | 0 |
| 1 | 0 | 1 | 1 | 1 | 1 | 1 | 0 | 0 |
| 1 | 0 | 1 | 1 | 1 | 0 | 0 | 0 | 0 |
| 1 | 0 | 1 | 1 | 0 | 0 | 0 | 0 | 0 |
| 1 | 0 | 1 | 1 | 0 | 0 | 0 | 0 | 0 |
| 1 | 1 | 1 | 1 | 1 | 1 | 0 | 1 | 0 |
| 1 | 1 | 1 | 1 | 0 | 0 | 0 | 0 | 0 |
| 1 | 1 | 1 | 0 | 1 | 0 | 0 | 1 | 0 |
| 1 | 0 | 1 | 1 | 0 | 0 | 0 | 0 | 0 |
| 1 | 1 | 1 | 1 | 1 | 0 | 0 | 0 | 1 |
| 1 | 1 | 1 | 1 | 1 | 0 | 1 | 1 | 0 |
| 1 | 0 | 0 | 1 | 1 | 1 | 0 | 1 | 0 |
| 1 | 0 | 1 | 1 | 1 | 0 | 1 | 1 | 0 |
| 0 | 0 | 1 | 1 | 0 | 0 | 0 | 0 | 0 |
| 1 | 0 | 1 | 0 | 1 | 0 | 0 | 0 | 0 |
| 1 | 0 | 0 | 0 | 0 | 0 | 0 | 0 | 0 |
| 0 | 0 | 1 | 1 | 0 | 0 | 0 | 0 | 0 |
| 1 | 0 | 1 | 1 | 1 | 1 | 0 | 1 | 0 |
| 0 | 0 | 0 | 1 | 1 | 1 | 0 | 0 | 1 |
| 1 | 0 | 1 | 1 | 0 | 1 | 0 | 0 | 1 |
| 1 | 0 | 1 | 1 | 0 | 1 | 0 | 1 | 0 |
| 1 | 0 | 0 | 1 | 0 | 1 | 0 | 1 | 1 |
| 1 | 0 | 1 | 1 | 1 | 0 | 0 | 0 | 0 |
| 1 | 0 | 1 | 1 | 1 | 0 | 0 | 0 | 0 |
| 1 | 0 | 1 | 1 | 1 | 0 | 0 | 0 | 0 |
| 1 | 0 | 1 | 0 | 0 | 0 | 0 | 0 | 0 |
| 1 | 1 | 1 | 1 | 1 | 0 | 0 | 0 | 0 |
| 0 | 0 | 1 | 1 | 0 | 0 | 0 | 0 | 0 |
| 0 | 0 | 1 | 1 | 0 | 0 | 0 | 0 | 0 |
| 1 | 1 | 1 | 0 | 1 | 0 | 0 | 0 | 0 |
| 1 | 0 | 1 | 0 | 0 | 0 | 0 | 0 | 0 |
| 1 | 0 | 1 | 1 | 0 | 1 | 0 | 0 | 0 |
| 1 | 0 | 1 | 1 | 0 | 0 | 0 | 1 | 0 |
| 1 | 0 | 1 | 0 | 1 | 0 | 0 | 0 | 0 |
| 0 | 0 | 1 | 1 | 0 | 1 | 1 | 0 | 0 |
| 1 | 1 | 1 | 1 | 0 | 0 | 0 | 0 | 0 |
| 1 | 0 | 1 | 0 | 0 | 0 | 1 | 0 | 0 |

|   |   |   |   |   |   |   |   |   |
|---|---|---|---|---|---|---|---|---|
| 1 | 0 | 0 | 0 | 0 | 0 | 0 | 0 | 0 |
| 0 | 0 | 1 | 0 | 0 | 0 | 1 | 0 | 0 |
| 1 | 0 | 1 | 1 | 1 | 1 | 0 | 1 | 0 |
| 1 | 0 | 1 | 1 | 1 | 0 | 0 | 0 | 0 |
| 1 | 0 | 1 | 0 | 1 | 0 | 1 | 0 | 0 |
| 0 | 0 | 1 | 1 | 0 | 0 | 0 | 0 | 0 |
| 1 | 0 | 1 | 1 | 1 | 1 | 0 | 1 | 0 |
| 1 | 1 | 1 | 1 | 1 | 1 | 0 | 1 | 0 |
| 1 | 1 | 1 | 0 | 0 | 0 | 1 | 0 | 0 |
| 1 | 1 | 0 | 0 | 1 | 0 | 1 | 0 | 0 |
| 1 | 0 | 1 | 1 | 0 | 0 | 1 | 1 | 0 |
| 1 | 1 | 0 | 1 | 0 | 1 | 0 | 0 | 0 |
| 1 | 0 | 0 | 0 | 0 | 0 | 0 | 0 | 0 |
| 1 | 0 | 1 | 1 | 1 | 0 | 1 | 0 | 0 |
| 1 | 0 | 1 | 0 | 0 | 0 | 1 | 0 | 0 |
| 1 | 0 | 1 | 1 | 1 | 0 | 0 | 0 | 0 |
| 1 | 1 | 1 | 1 | 1 | 0 | 0 | 0 | 0 |
| 1 | 1 | 1 | 1 | 1 | 0 | 0 | 1 | 0 |
| 1 | 0 | 1 | 1 | 0 | 0 | 0 | 0 | 0 |
| 1 | 1 | 0 | 0 | 1 | 0 | 1 | 0 | 0 |
| 1 | 0 | 1 | 0 | 1 | 0 | 0 | 0 | 0 |
| 1 | 1 | 1 | 0 | 1 | 1 | 0 | 1 | 0 |
| 1 | 0 | 1 | 1 | 1 | 1 | 0 | 0 | 0 |
| 1 | 0 | 1 | 1 | 1 | 1 | 0 | 1 | 1 |
| 1 | 0 | 1 | 1 | 1 | 0 | 0 | 0 | 0 |
| 1 | 1 | 1 | 1 | 1 | 0 | 0 | 0 | 0 |
| 1 | 1 | 1 | 1 | 1 | 1 | 0 | 1 | 0 |
| 1 | 0 | 0 | 1 | 1 | 1 | 0 | 1 | 0 |
| 1 | 0 | 0 | 1 | 1 | 1 | 0 | 1 | 0 |
| 1 | 1 | 1 | 1 | 1 | 1 | 0 | 0 | 1 |
| 1 | 0 | 1 | 1 | 1 | 1 | 0 | 1 | 1 |
| 1 | 0 | 1 | 0 | 0 | 0 | 1 | 0 | 0 |
| 1 | 1 | 1 | 1 | 1 | 1 | 0 | 0 | 0 |
| 1 | 0 | 1 | 1 | 1 | 1 | 0 | 1 | 0 |
| 1 | 0 | 1 | 1 | 0 | 0 | 0 | 0 | 0 |
| 0 | 0 | 1 | 0 | 0 | 0 | 0 | 0 | 0 |
| 1 | 0 | 0 | 1 | 1 | 1 | 0 | 1 | 0 |
| 1 | 0 | 0 | 1 | 1 | 1 | 0 | 1 | 0 |



|   |   |   |   |   |   |   |   |   |
|---|---|---|---|---|---|---|---|---|
| 1 | 0 | 0 | 1 | 1 | 1 | 0 | 1 | 0 |
| 1 | 1 | 0 | 1 | 1 | 0 | 0 | 0 | 0 |
| 1 | 1 | 1 | 1 | 1 | 1 | 0 | 1 | 0 |
| 0 | 0 | 1 | 1 | 0 | 0 | 0 | 0 | 0 |
| 1 | 0 | 1 | 1 | 1 | 1 | 0 | 0 | 0 |
| 1 | 0 | 1 | 1 | 1 | 1 | 0 | 1 | 1 |
| 0 | 0 | 1 | 0 | 0 | 0 | 0 | 0 | 0 |
| 1 | 0 | 1 | 0 | 1 | 0 | 1 | 0 | 0 |
| 1 | 0 | 0 | 0 | 0 | 0 | 0 | 0 | 0 |
| 0 | 0 | 1 | 0 | 0 | 0 | 0 | 0 | 0 |
| 1 | 0 | 1 | 0 | 0 | 0 | 1 | 0 | 0 |
| 1 | 0 | 1 | 1 | 1 | 1 | 1 | 1 | 0 |
| 1 | 0 | 1 | 0 | 1 | 0 | 1 | 0 | 0 |
| 1 | 0 | 0 | 0 | 0 | 0 | 0 | 0 | 0 |
| 1 | 0 | 1 | 1 | 0 | 0 | 0 | 0 | 0 |
| 1 | 0 | 0 | 0 | 0 | 0 | 0 | 0 | 0 |
| 0 | 0 | 0 | 1 | 0 | 0 | 0 | 0 | 0 |
| 1 | 1 | 1 | 1 | 1 | 0 | 0 | 0 | 0 |
| 1 | 1 | 1 | 1 | 1 | 0 | 0 | 1 | 0 |
| 1 | 0 | 0 | 1 | 0 | 0 | 0 | 0 | 0 |
| 0 | 0 | 1 | 1 | 0 | 0 | 1 | 0 | 0 |
| 1 | 1 | 1 | 1 | 1 | 0 | 0 | 0 | 0 |
| 1 | 0 | 0 | 0 | 0 | 0 | 0 | 0 | 0 |
| 1 | 0 | 0 | 0 | 0 | 0 | 0 | 0 | 0 |
| 1 | 0 | 0 | 0 | 0 | 0 | 0 | 0 | 0 |
| 1 | 1 | 1 | 1 | 1 | 0 | 1 | 1 | 0 |
| 1 | 0 | 1 | 1 | 1 | 1 | 1 | 0 | 1 |
| 0 | 0 | 1 | 1 | 0 | 0 | 0 | 0 | 0 |
| 0 | 1 | 1 | 0 | 0 | 0 | 0 | 0 | 0 |
| 1 | 0 | 1 | 0 | 0 | 0 | 0 | 0 | 0 |
| 1 | 1 | 1 | 1 | 1 | 1 | 0 | 1 | 0 |
| 1 | 0 | 1 | 1 | 0 | 1 | 0 | 1 | 1 |
| 1 | 0 | 1 | 0 | 0 | 0 | 0 | 0 | 0 |
| 1 | 0 | 0 | 0 | 0 | 0 | 0 | 0 | 0 |
| 1 | 0 | 1 | 0 | 0 | 0 | 1 | 0 | 0 |
| 1 | 0 | 1 | 1 | 0 | 0 | 0 | 0 | 0 |
| 0 | 0 | 0 | 1 | 0 | 0 | 0 | 0 | 0 |
| 1 | 0 | 0 | 0 | 0 | 0 | 0 | 0 | 0 |
| 0 | 0 | 0 | 0 | 0 | 0 | 0 | 0 | 0 |
| 1 | 0 | 0 | 0 | 0 | 0 | 0 | 0 | 0 |
| 1 | 0 | 1 | 0 | 0 | 0 | 0 | 0 | 0 |
| 1 | 0 | 0 | 0 | 0 | 0 | 0 | 0 | 0 |
| 0 | 0 | 0 | 0 | 0 | 0 | 0 | 0 | 0 |
| 1 | 0 | 0 | 0 | 0 | 0 | 0 | 0 | 0 |
| 1 | 0 | 1 | 0 | 1 | 0 | 1 | 0 | 0 |
| 0 | 0 | 0 | 1 | 0 | 0 | 0 | 0 | 0 |
| 1 | 0 | 1 | 0 | 0 | 0 | 0 | 0 | 0 |
| 1 | 0 | 1 | 1 | 1 | 0 | 0 | 0 | 0 |



|   |   |   |   |   |   |   |   |   |
|---|---|---|---|---|---|---|---|---|
| 1 | 0 | 1 | 0 | 0 | 0 | 0 | 0 | 0 |
| 1 | 0 | 1 | 0 | 0 | 0 | 0 | 0 | 0 |
| 0 | 0 | 1 | 1 | 0 | 0 | 0 | 0 | 0 |
| 1 | 0 | 1 | 0 | 0 | 0 | 0 | 0 | 0 |
| 1 | 1 | 1 | 0 | 0 | 0 | 0 | 0 | 0 |
| 1 | 0 | 1 | 1 | 1 | 0 | 0 | 0 | 0 |
| 0 | 0 | 1 | 0 | 0 | 0 | 0 | 0 | 0 |
| 1 | 0 | 1 | 0 | 0 | 0 | 0 | 0 | 0 |
| 1 | 0 | 1 | 0 | 0 | 0 | 1 | 0 | 0 |
| 1 | 0 | 1 | 0 | 0 | 0 | 1 | 0 | 0 |
| 1 | 0 | 1 | 1 | 0 | 0 | 1 | 0 | 0 |
| 1 | 0 | 1 | 1 | 1 | 1 | 1 | 1 | 0 |
| 1 | 1 | 1 | 1 | 0 | 0 | 1 | 0 | 0 |
| 1 | 1 | 1 | 1 | 1 | 0 | 1 | 0 | 0 |
| 1 | 0 | 1 | 1 | 1 | 0 | 0 | 1 | 0 |
| 0 | 0 | 1 | 1 | 0 | 0 | 0 | 0 | 0 |
| 1 | 0 | 1 | 1 | 1 | 0 | 1 | 0 | 0 |
| 1 | 0 | 1 | 0 | 0 | 0 | 0 | 0 | 0 |
| 1 | 0 | 1 | 0 | 0 | 0 | 1 | 0 | 0 |
| 1 | 1 | 0 | 0 | 1 | 0 | 0 | 0 | 0 |
| 1 | 0 | 1 | 0 | 0 | 0 | 0 | 0 | 0 |
| 0 | 0 | 1 | 0 | 0 | 0 | 0 | 0 | 0 |
| 1 | 0 | 1 | 0 | 1 | 0 | 0 | 0 | 0 |
| 0 | 0 | 0 | 0 | 0 | 0 | 0 | 0 | 0 |
| 0 | 0 | 1 | 0 | 0 | 0 | 0 | 0 | 0 |
| 1 | 0 | 1 | 0 | 1 | 1 | 0 | 1 | 0 |
| 1 | 0 | 1 | 0 | 0 | 0 | 0 | 0 | 0 |
| 1 | 0 | 1 | 1 | 1 | 0 | 0 | 0 | 0 |
| 1 | 0 | 1 | 0 | 0 | 0 | 0 | 0 | 0 |
| 1 | 1 | 1 | 1 | 1 | 1 | 0 | 1 | 0 |
| 1 | 1 | 1 | 1 | 1 | 1 | 0 | 1 | 0 |
| 1 | 0 | 1 | 1 | 0 | 0 | 0 | 0 | 0 |
| 1 | 0 | 1 | 1 | 0 | 0 | 0 | 1 | 0 |
| 1 | 0 | 1 | 1 | 1 | 1 | 0 | 1 | 0 |
| 1 | 1 | 1 | 1 | 1 | 1 | 0 | 0 | 0 |
| 1 | 0 | 1 | 0 | 0 | 0 | 0 | 0 | 0 |
| 1 | 1 | 1 | 1 | 1 | 1 | 1 | 1 | 1 |
| 1 | 1 | 1 | 1 | 1 | 1 | 0 | 1 | 0 |
| 1 | 0 | 1 | 0 | 0 | 0 | 0 | 0 | 0 |
| 1 | 1 | 1 | 1 | 1 | 1 | 0 | 1 | 1 |
| 1 | 0 | 1 | 1 | 1 | 1 | 1 | 0 | 0 |
| 1 | 0 | 1 | 1 | 1 | 1 | 0 | 1 | 1 |
| 1 | 0 | 0 | 0 | 0 | 0 | 0 | 0 | 0 |
| 1 | 1 | 1 | 1 | 1 | 1 | 0 | 1 | 0 |
| 0 | 0 | 1 | 1 | 0 | 0 | 0 | 0 | 0 |
| 1 | 0 | 1 | 1 | 1 | 0 | 0 | 0 | 0 |
| 0 | 0 | 1 | 1 | 0 | 1 | 0 | 1 | 0 |

|   |   |   |   |   |   |   |   |   |
|---|---|---|---|---|---|---|---|---|
| 1 | 1 | 1 | 1 | 1 | 1 | 1 | 1 | 1 |
| 1 | 1 | 1 | 1 | 1 | 1 | 0 | 1 | 0 |
| 1 | 0 | 0 | 1 | 1 | 1 | 0 | 1 | 0 |
| 1 | 1 | 1 | 1 | 1 | 1 | 0 | 1 | 0 |
| 1 | 0 | 1 | 1 | 1 | 0 | 0 | 1 | 1 |
| 1 | 0 | 1 | 1 | 1 | 1 | 0 | 0 | 0 |
| 1 | 1 | 1 | 0 | 0 | 0 | 0 | 0 | 0 |
| 1 | 1 | 1 | 0 | 0 | 0 | 0 | 0 | 0 |
| 1 | 1 | 1 | 1 | 1 | 1 | 0 | 1 | 0 |
| 1 | 1 | 1 | 1 | 1 | 1 | 0 | 1 | 0 |
| 1 | 0 | 0 | 1 | 1 | 0 | 0 | 1 | 0 |
| 1 | 1 | 1 | 1 | 1 | 1 | 0 | 1 | 0 |
| 1 | 1 | 1 | 1 | 1 | 1 | 1 | 1 | 0 |
| 1 | 0 | 1 | 1 | 1 | 0 | 1 | 0 | 0 |

| UniqueKey | RECSTATUS | C1DELIVER | ESTIAGEOF | AGEMONTI | BIRTHWEIG | BFDURATIC | MOTERNAL | ANCATTEN |
|-----------|-----------|-----------|-----------|----------|-----------|-----------|----------|----------|
| 297       | 1         | 3         | 2.00      | 3.00     | 2.00      | 3.00      | 2.00     | 2.00     |
| 298       | 1         | 1         | 2.00      | 2.00     | 2.00      | 3.00      | 2.00     | 2.00     |
| 299       | 1         | 1         | 1.00      | 3.00     | 2.00      | 2.00      | 2.00     | 2.00     |
| 300       | 1         | 2         | 1.00      | 2.00     | 2.00      | 2.00      | 2.00     | 1.00     |
| 301       | 1         | 2         | 2.00      | 1.00     | 2.00      | 2.00      | 2.00     | 2.00     |
| 322       | 1         | 1         | 2.00      | 2.00     | 2.00      | 2.00      | 2.00     | 1.00     |
| 302       | 1         | 1         | 1.00      | 3.00     | 2.00      | 2.00      | 2.00     | 2.00     |
| 303       | 1         | 1         | 1.00      | 3.00     | 2.00      | 2.00      | 2.00     | 2.00     |
| 304       | 1         | 1         | 2.00      | 1.00     | 2.00      | 2.00      | 2.00     | 2.00     |
| 305       | 1         | 1         | 1.00      | 2.00     | 2.00      | 2.00      | 2.00     | 2.00     |
| 306       | 1         | 3         | 1.00      | 1.00     | 1.00      | 2.00      | 2.00     | 2.00     |
| 307       | 1         | 1         | 2.00      | 1.00     | 2.00      | 2.00      | 1.00     | 2.00     |
| 308       | 1         | 1         | 1.00      | 1.00     | 2.00      | 2.00      | 1.00     | 2.00     |
| 309       | 1         | 1         | 1.00      | 2.00     | 2.00      | 2.00      | 2.00     | 2.00     |
| 310       | 1         | 2         | 2.00      | 1.00     | 1.00      | 2.00      | 2.00     | 2.00     |
| 311       | 1         | 1         | 1.00      | 1.00     | 2.00      | 2.00      | 2.00     | 2.00     |
| 312       | 1         | 2         | 2.00      | 2.00     | 2.00      | 2.00      | 1.00     | 2.00     |
| 313       | 1         | 2         | 1.00      | 2.00     | 2.00      | 2.00      | 1.00     | 2.00     |
| 314       | 1         | 3         | 1.00      | 1.00     | 2.00      | 2.00      | 2.00     | 1.00     |
| 315       | 1         | 2         | 2.00      | 1.00     | 2.00      | 2.00      | 2.00     | 2.00     |
| 316       | 1         | 1         | 2.00      | 1.00     | 2.00      | 3.00      | 1.00     | 2.00     |
| 317       | 1         | 1         | 1.00      | 2.00     | 2.00      | 2.00      | 1.00     | 2.00     |
| 318       | 1         | 3         | 2.00      | 2.00     | 2.00      | 3.00      | 2.00     | 1.00     |
| 319       | 1         | 1         | 1.00      | 3.00     | 2.00      | 2.00      | 3.00     | 2.00     |
| 320       | 1         | 2         | 2.00      | 3.00     | 2.00      | 2.00      | 2.00     | 2.00     |
| 321       | 1         | 3         | 2.00      | 2.00     | 2.00      | 3.00      | 2.00     | 2.00     |
| 323       | 1         | 4         | 2.00      | 1.00     | 2.00      | 2.00      | 3.00     | 2.00     |
| 324       | 1         | 1         | 1.00      | 2.00     | 2.00      | 2.00      | 2.00     | 2.00     |
| 325       | 1         | 1         | 2.00      | 3.00     | 2.00      | 2.00      | 2.00     | 2.00     |
| 326       | 1         | 1         | 1.00      | 2.00     | 2.00      | 2.00      | 2.00     | 2.00     |
| 327       | 1         | 1         | 1.00      | 2.00     | 2.00      | 2.00      | 1.00     | 2.00     |
| 328       | 1         | 1         | 1.00      | 2.00     | 2.00      | 2.00      | 2.00     | 2.00     |
| 329       | 1         | 1         | 2.00      | 2.00     | 2.00      | 3.00      | 2.00     | 2.00     |
| 330       | 1         | 1         | 2.00      | 2.00     | 1.00      | 3.00      | 2.00     | 2.00     |
| 331       | 1         | 3         | 1.00      | 2.00     | 2.00      | 2.00      | 2.00     | 2.00     |
| 332       | 1         | 1         | 1.00      | 2.00     | 2.00      | 2.00      | 2.00     | 2.00     |
| 333       | 1         | 1         | 2.00      | 3.00     | 2.00      | 3.00      | 2.00     | 2.00     |
| 334       | 1         | 1         | 2.00      | 3.00     | 2.00      | 2.00      | 1.00     | 2.00     |
| 335       | 1         | 1         | 1.00      | 2.00     | 2.00      | 2.00      | 1.00     | 2.00     |
| 336       | 1         | 4         | 1.00      | 2.00     | 2.00      | 2.00      | 2.00     | 2.00     |
| 337       | 1         | 2         | 2.00      | 3.00     | 2.00      | 3.00      | 2.00     | 2.00     |
| 338       | 1         | 1         | 1.00      | 3.00     | 1.00      | 2.00      | 2.00     | 2.00     |
| 339       | 1         | 1         | 2.00      | 3.00     | 1.00      | 2.00      | 2.00     | 2.00     |
| 340       | 1         | 4         | 2.00      | 3.00     | 2.00      | 2.00      | 2.00     | 2.00     |
| 341       | 1         | 2         | 2.00      | 3.00     | 2.00      | 3.00      | 2.00     | 2.00     |
| 342       | 1         | 3         | 2.00      | 3.00     | 2.00      | 2.00      | 2.00     | 2.00     |

|     |   |   |      |      |      |      |      |      |
|-----|---|---|------|------|------|------|------|------|
| 282 | 1 | 2 | 2.00 | 3.00 | 2.00 | 3.00 | 2.00 | 2.00 |
| 343 | 1 | 1 | 1.00 | 2.00 | 2.00 | 2.00 | 1.00 | 2.00 |
| 344 | 1 | 3 | 2.00 | 1.00 | 2.00 | 2.00 | 2.00 | 2.00 |
| 345 | 1 | 1 | 2.00 | 2.00 | 2.00 | 2.00 | 1.00 | 2.00 |
| 346 | 1 | 1 | 1.00 | 2.00 | 2.00 | 2.00 | 2.00 | 2.00 |
| 281 | 1 | 1 | 2.00 | 1.00 | 2.00 | 2.00 | 1.00 | 2.00 |
| 347 | 1 | 3 | 1.00 | 2.00 | 2.00 | 2.00 | 3.00 | 2.00 |
| 373 | 1 | 2 | 2.00 | 3.00 | 2.00 | 2.00 | 1.00 | 2.00 |
| 374 | 1 | 3 | 2.00 | 3.00 | 2.00 | 3.00 | 1.00 | 2.00 |
| 375 | 1 | 4 | 1.00 | 1.00 | 2.00 | 2.00 | 2.00 | 2.00 |
| 376 | 1 | 1 | 1.00 | 2.00 | 2.00 | 2.00 | 1.00 | 1.00 |
| 377 | 1 | 1 | 1.00 | 3.00 | 2.00 | 2.00 | 1.00 | 1.00 |
| 378 | 1 | 2 | 2.00 | 1.00 | 2.00 | 3.00 | 3.00 | 1.00 |
| 379 | 1 | 1 | 2.00 | 3.00 | 2.00 | 3.00 | 1.00 | 1.00 |
| 380 | 1 | 1 | 1.00 | 1.00 | 1.00 | 2.00 | 1.00 | 1.00 |
| 381 | 1 | 4 | 2.00 | 3.00 | 2.00 | 3.00 | 2.00 | 2.00 |
| 382 | 1 | 1 | 1.00 | 1.00 | 2.00 | 2.00 | 1.00 | 1.00 |
| 383 | 1 | 3 | 2.00 | 3.00 | 2.00 | 2.00 | 2.00 | 2.00 |
| 384 | 1 | 2 | 2.00 | 3.00 | 2.00 | 3.00 | 2.00 | 2.00 |
| 385 | 1 | 3 | 1.00 | 2.00 | 1.00 | 2.00 | 2.00 | 2.00 |
| 386 | 1 | 4 | 2.00 | 1.00 | 2.00 | 3.00 | 2.00 | 2.00 |
| 387 | 1 | 4 | 2.00 | 3.00 | 2.00 | 2.00 | 3.00 | 2.00 |
| 388 | 1 | 2 | 1.00 | 2.00 | 2.00 | 2.00 | 1.00 | 2.00 |
| 389 | 1 | 3 | 2.00 | 1.00 | 2.00 | 2.00 | 2.00 | 2.00 |
| 390 | 1 | 4 | 1.00 | 3.00 | 2.00 | 2.00 | 2.00 | 2.00 |
| 391 | 1 | 2 | 1.00 | 2.00 | 2.00 | 2.00 | 3.00 | 2.00 |
| 392 | 1 | 4 | 2.00 | 2.00 | 2.00 | 2.00 | 2.00 | 2.00 |
| 393 | 1 | 2 | 2.00 | 2.00 | 2.00 | 2.00 | 1.00 | 2.00 |
| 394 | 1 | 1 | 1.00 | 1.00 | 2.00 | 2.00 | 1.00 | 2.00 |
| 395 | 1 | 4 | 2.00 | 3.00 | 2.00 | 2.00 | 2.00 | 2.00 |
| 396 | 1 | 1 | 1.00 | 2.00 | 2.00 | 2.00 | 2.00 | 1.00 |
| 397 | 1 | 3 | 2.00 | 3.00 | 2.00 | 3.00 | 2.00 | 2.00 |
| 398 | 1 | 3 | 1.00 | 1.00 | 2.00 | 2.00 | 2.00 | 2.00 |
| 399 | 1 | 2 | 2.00 | 2.00 | 2.00 | 3.00 | 2.00 | 2.00 |
| 400 | 1 | 3 | 2.00 | 3.00 | 2.00 | 3.00 | 2.00 | 2.00 |
| 401 | 1 | 4 | 1.00 | 2.00 | 2.00 | 2.00 | 3.00 | 2.00 |
| 402 | 1 | 4 | 1.00 | 2.00 | 2.00 | 2.00 | 3.00 | 2.00 |
| 403 | 1 | 3 | 2.00 | 3.00 | 2.00 | 2.00 | 2.00 | 2.00 |
| 404 | 1 | 4 | 1.00 | 2.00 | 1.00 | 2.00 | 2.00 | 1.00 |
| 405 | 1 | 2 | 2.00 | 3.00 | 2.00 | 2.00 | 2.00 | 2.00 |
| 406 | 1 | 4 | 2.00 | 3.00 | 2.00 | 2.00 | 2.00 | 2.00 |
| 407 | 1 | 1 | 1.00 | 3.00 | 1.00 | 2.00 | 2.00 | 2.00 |
| 408 | 1 | 2 | 2.00 | 1.00 | 2.00 | 2.00 | 2.00 | 2.00 |
| 409 | 1 | 1 | 1.00 | 3.00 | 2.00 | 2.00 | 1.00 | 1.00 |
| 410 | 1 | 2 | 2.00 | 2.00 | 2.00 | 2.00 | 2.00 | 2.00 |
| 411 | 1 | 1 | 1.00 | 1.00 | 2.00 | 2.00 | 2.00 | 1.00 |
| 412 | 1 | 1 | 1.00 | 1.00 | 2.00 | 2.00 | 3.00 | 2.00 |

|     |   |   |      |      |      |      |      |      |
|-----|---|---|------|------|------|------|------|------|
| 413 | 1 | 4 | 2.00 | 3.00 | 2.00 | 2.00 | 3.00 | 1.00 |
| 414 | 1 | 4 | 1.00 | 2.00 | 2.00 | 2.00 | 2.00 | 2.00 |
| 1   | 1 | 1 | 2.00 | 1.00 | 2.00 | 3.00 | 1.00 | 2.00 |
| 106 | 1 | 4 | 1.00 | 1.00 | 2.00 | 2.00 | 2.00 | 2.00 |
| 2   | 1 | 4 | 2.00 | 3.00 | 2.00 | 2.00 | 2.00 | 2.00 |
| 3   | 1 | 3 | 1.00 | 2.00 | 2.00 | 2.00 | 2.00 | 1.00 |
| 4   | 1 | 2 | 2.00 | 3.00 | 2.00 | 3.00 | 2.00 | 1.00 |
| 5   | 1 | 1 | 1.00 | 1.00 | 2.00 | 2.00 | 1.00 | 2.00 |
| 6   | 1 | 3 | 2.00 | 2.00 | 2.00 | 2.00 | 2.00 | 2.00 |
| 7   | 1 | 2 | 1.00 | 3.00 | 2.00 | 2.00 | 2.00 | 1.00 |
| 8   | 1 | 1 | 2.00 | 2.00 | 2.00 | 3.00 | 1.00 | 2.00 |
| 9   | 1 | 3 | 1.00 | 1.00 | 2.00 | 2.00 | 2.00 | 2.00 |
| 10  | 1 | 4 | 2.00 | 3.00 | 2.00 | 3.00 | 2.00 | 2.00 |
| 11  | 1 | 4 | 2.00 | 2.00 | 2.00 | 3.00 | 2.00 | 2.00 |
| 12  | 1 | 1 | 2.00 | 3.00 | 2.00 | 3.00 | 2.00 | 2.00 |
| 13  | 1 | 2 | 1.00 | 1.00 | 2.00 | 2.00 | 2.00 | 2.00 |
| 14  | 1 | 4 | 1.00 | 1.00 | 2.00 | 2.00 | 3.00 | 2.00 |
| 15  | 1 | 4 | 1.00 | 1.00 | 2.00 | 2.00 | 2.00 | 2.00 |
| 16  | 1 | 2 | 2.00 | 3.00 | 2.00 | 2.00 | 1.00 | 2.00 |
| 17  | 1 | 2 | 1.00 | 1.00 | 2.00 | 2.00 | 1.00 | 2.00 |
| 18  | 1 | 4 | 2.00 | 3.00 | 1.00 | 2.00 | 1.00 | 2.00 |
| 19  | 1 | 1 | 2.00 | 3.00 | 2.00 | 2.00 | 1.00 | 2.00 |
| 20  | 1 | 2 | 1.00 | 1.00 | 2.00 | 2.00 | 2.00 | 2.00 |
| 21  | 1 | 2 | 2.00 | 3.00 | 2.00 | 3.00 | 2.00 | 2.00 |
| 22  | 1 | 2 | 2.00 | 3.00 | 2.00 | 2.00 | 2.00 | 2.00 |
| 23  | 1 | 1 | 1.00 | 1.00 | 2.00 | 2.00 | 2.00 | 2.00 |
| 24  | 1 | 1 | 2.00 | 1.00 | 1.00 | 2.00 | 1.00 | 2.00 |
| 25  | 1 | 4 | 2.00 | 2.00 | 2.00 | 3.00 | 3.00 | 2.00 |
| 26  | 1 | 1 | 1.00 | 1.00 | 2.00 | 2.00 | 2.00 | 2.00 |
| 27  | 1 | 2 | 2.00 | 3.00 | 2.00 | 2.00 | 1.00 | 2.00 |
| 28  | 1 | 2 | 1.00 | 2.00 | 2.00 | 2.00 | 2.00 | 2.00 |
| 29  | 1 | 1 | 1.00 | 1.00 | 2.00 | 2.00 | 2.00 | 2.00 |
| 30  | 1 | 2 | 2.00 | 1.00 | 2.00 | 3.00 | 2.00 | 2.00 |
| 31  | 1 | 4 | 1.00 | 1.00 | 2.00 | 2.00 | 2.00 | 2.00 |
| 32  | 1 | 1 | 2.00 | 3.00 | 2.00 | 2.00 | 2.00 | 2.00 |
| 33  | 1 | 1 | 1.00 | 2.00 | 2.00 | 3.00 | 1.00 | 2.00 |
| 34  | 1 | 1 | 1.00 | 1.00 | 2.00 | 2.00 | 1.00 | 2.00 |
| 35  | 1 | 2 | 2.00 | 3.00 | 1.00 | 2.00 | 2.00 | 2.00 |
| 36  | 1 | 2 | 1.00 | 2.00 | 2.00 | 2.00 | 2.00 | 2.00 |
| 37  | 1 | 1 | 2.00 | 3.00 | 2.00 | 2.00 | 2.00 | 2.00 |
| 38  | 1 | 3 | 1.00 | 2.00 | 2.00 | 2.00 | 2.00 | 2.00 |
| 39  | 1 | 4 | 2.00 | 2.00 | 2.00 | 2.00 | 2.00 | 1.00 |
| 40  | 1 | 3 | 1.00 | 1.00 | 2.00 | 2.00 | 2.00 | 2.00 |
| 41  | 1 | 3 | 1.00 | 2.00 | 2.00 | 2.00 | 2.00 | 2.00 |
| 42  | 1 | 1 | 2.00 | 2.00 | 2.00 | 2.00 | 1.00 | 2.00 |
| 43  | 1 | 3 | 1.00 | 2.00 | 2.00 | 2.00 | 2.00 | 1.00 |
| 44  | 1 | 4 | 1.00 | 2.00 | 2.00 | 2.00 | 2.00 | 2.00 |

|    |   |   |      |      |      |        |      |      |
|----|---|---|------|------|------|--------|------|------|
| 45 | 1 | 3 | 2.00 | 3.00 | 2.00 | 2.00   | 2.00 | 2.00 |
| 46 | 1 | 1 | 1.00 | 2.00 | 1.00 | 2.00   | 2.00 | 2.00 |
| 47 | 1 | 3 | 2.00 | 3.00 | 2.00 | 3.00   | 2.00 | 2.00 |
| 48 | 1 | 1 | 2.00 | 1.00 | 2.00 | 2.00   | 1.00 | 1.00 |
| 49 | 1 | 4 | 2.00 | 1.00 | 2.00 | 2.00   | 2.00 | 2.00 |
| 50 | 1 | 1 | 1.00 | 2.00 | 2.00 | 2.00   | 2.00 | 2.00 |
| 51 | 1 | 4 | 1.00 | 1.00 | 2.00 | 2.00   | 2.00 | 2.00 |
| 52 | 1 | 1 | 2.00 | 2.00 | 2.00 | 2.00   | 1.00 | 2.00 |
| 53 | 1 | 1 | 1.00 | 2.00 | 2.00 | 1.00   | 2.00 | 2.00 |
| 54 | 1 | 1 | 2.00 | 3.00 | 2.00 | 2.00   | 2.00 | 1.00 |
| 55 | 1 | 1 | 1.00 | 1.00 | 2.00 | 2.00   | 2.00 | 2.00 |
| 56 | 1 | 2 | 2.00 | 1.00 | 2.00 | 2.00   | 2.00 | 2.00 |
| 57 | 1 | 4 | 2.00 | 3.00 | 2.00 | 2.00   | 2.00 | 1.00 |
| 58 | 1 | 3 | 1.00 | 2.00 | 2.00 | 2.00   | 2.00 | 2.00 |
| 59 | 1 | 3 | 2.00 | 3.00 | 2.00 | 3.00   | 3.00 | 2.00 |
| 60 | 1 | 1 | 1.00 | 2.00 | 2.00 | 2.00   | 2.00 | 2.00 |
| 61 | 1 | 4 | 2.00 | 3.00 | 2.00 | 3.00   | 2.00 | 2.00 |
| 62 | 1 | 4 | 1.00 | 2.00 | 2.00 | 2.00   | 2.00 | 2.00 |
| 63 | 1 | 1 | 2.00 | 3.00 | 2.00 | 2.00   | 2.00 | 2.00 |
| 64 | 1 | 4 | 1.00 | 2.00 | 2.00 | 2.00   | 2.00 | 2.00 |
| 65 | 1 | 1 | 2.00 | 3.00 | 2.00 | 2.00   | 2.00 | 2.00 |
| 66 | 1 | 1 | 1.00 | 1.00 | 2.00 | 2.00   | 2.00 | 1.00 |
| 67 | 1 | 4 | 1.00 | 2.00 | 2.00 | 2.00   | 3.00 | 1.00 |
| 68 | 1 | 1 | 2.00 | 3.00 | 2.00 | 3.00   | 1.00 | 2.00 |
| 69 | 1 | 3 | 2.00 | 3.00 | 2.00 | #NULL! | 3.00 | 2.00 |
| 70 | 1 | 1 | 1.00 | 2.00 | 2.00 | 2.00   | 1.00 | 2.00 |
| 71 | 1 | 4 | 2.00 | 2.00 | 2.00 | 3.00   | 2.00 | 1.00 |
| 72 | 1 | 1 | 1.00 | 2.00 | 2.00 | 2.00   | 1.00 | 1.00 |
| 73 | 1 | 1 | 2.00 | 2.00 | 2.00 | 2.00   | 1.00 | 2.00 |
| 74 | 1 | 3 | 1.00 | 2.00 | 2.00 | 2.00   | 2.00 | 2.00 |
| 75 | 1 | 4 | 2.00 | 3.00 | 2.00 | 3.00   | 2.00 | 2.00 |
| 76 | 1 | 1 | 1.00 | 1.00 | 2.00 | 2.00   | 1.00 | 2.00 |
| 77 | 1 | 4 | 2.00 | 3.00 | 2.00 | 3.00   | 2.00 | 2.00 |
| 78 | 1 | 1 | 2.00 | 3.00 | 2.00 | 2.00   | 1.00 | 2.00 |
| 79 | 1 | 1 | 1.00 | 2.00 | 2.00 | 2.00   | 1.00 | 2.00 |
| 80 | 1 | 1 | 1.00 | 1.00 | 2.00 | 2.00   | 2.00 | 2.00 |
| 81 | 1 | 2 | 1.00 | 1.00 | 2.00 | 2.00   | 1.00 | 2.00 |
| 82 | 1 | 2 | 2.00 | 3.00 | 2.00 | 2.00   | 2.00 | 2.00 |
| 84 | 1 | 1 | 1.00 | 2.00 | 2.00 | 2.00   | 2.00 | 2.00 |
| 85 | 1 | 4 | 2.00 | 2.00 | 2.00 | 2.00   | 2.00 | 2.00 |
| 86 | 1 | 4 | 1.00 | 2.00 | 2.00 | 2.00   | 2.00 | 2.00 |
| 87 | 1 | 1 | 2.00 | 3.00 | 2.00 | 2.00   | 1.00 | 2.00 |
| 88 | 1 | 2 | 1.00 | 2.00 | 2.00 | 2.00   | 1.00 | 2.00 |
| 89 | 1 | 3 | 1.00 | 2.00 | 2.00 | 2.00   | 2.00 | 1.00 |
| 90 | 1 | 4 | 2.00 | 3.00 | 2.00 | #NULL! | 2.00 | 2.00 |
| 91 | 1 | 1 | 2.00 | 2.00 | 2.00 | 3.00   | 2.00 | 2.00 |
| 92 | 1 | 3 | 1.00 | 2.00 | 2.00 | 2.00   | 2.00 | 2.00 |



|     |   |   |      |      |      |      |      |      |
|-----|---|---|------|------|------|------|------|------|
| 93  | 1 | 1 | 2.00 | 3.00 | 2.00 | 2.00 | 2.00 | 2.00 |
| 105 | 1 | 2 | 1.00 | 2.00 | 2.00 | 2.00 | 2.00 | 2.00 |
| 107 | 1 | 1 | 1.00 | 2.00 | 2.00 | 2.00 | 1.00 | 1.00 |
| 108 | 1 | 3 | 1.00 | 2.00 | 2.00 | 2.00 | 2.00 | 2.00 |
| 109 | 1 | 2 | 2.00 | 2.00 | 1.00 | 2.00 | 2.00 | 2.00 |
| 110 | 1 | 1 | 2.00 | 2.00 | 2.00 | 2.00 | 1.00 | 2.00 |
| 112 | 1 | 3 | 1.00 | 2.00 | 2.00 | 2.00 | 2.00 | 2.00 |
| 113 | 1 | 1 | 2.00 | 2.00 | 2.00 | 3.00 | 1.00 | 2.00 |
| 114 | 1 | 2 | 2.00 | 1.00 | 2.00 | 3.00 | 2.00 | 2.00 |
| 115 | 1 | 4 | 1.00 | 2.00 | 2.00 | 2.00 | 3.00 | 2.00 |
| 116 | 1 | 3 | 2.00 | 3.00 | 1.00 | 2.00 | 2.00 | 2.00 |
| 117 | 1 | 1 | 1.00 | 2.00 | 1.00 | 2.00 | 2.00 | 2.00 |
| 118 | 1 | 2 | 2.00 | 3.00 | 2.00 | 2.00 | 1.00 | 2.00 |
| 119 | 1 | 1 | 1.00 | 2.00 | 2.00 | 2.00 | 1.00 | 2.00 |
| 120 | 1 | 2 | 2.00 | 2.00 | 2.00 | 2.00 | 2.00 | 2.00 |
| 121 | 1 | 3 | 2.00 | 2.00 | 2.00 | 2.00 | 2.00 | 2.00 |
| 122 | 1 | 4 | 1.00 | 2.00 | 2.00 | 2.00 | 2.00 | 2.00 |
| 445 | 1 | 2 | 2.00 | 1.00 | 2.00 | 2.00 | 2.00 | 2.00 |
| 135 | 1 | 1 | 1.00 | 1.00 | 2.00 | 2.00 | 3.00 | 2.00 |
| 136 | 1 | 4 | 2.00 | 3.00 | 2.00 | 3.00 | 2.00 | 2.00 |
| 137 | 1 | 2 | 2.00 | 3.00 | 2.00 | 2.00 | 2.00 | 2.00 |
| 138 | 1 | 2 | 1.00 | 2.00 | 2.00 | 2.00 | 2.00 | 2.00 |
| 139 | 1 | 1 | 2.00 | 3.00 | 2.00 | 3.00 | 2.00 | 2.00 |
| 140 | 1 | 4 | 1.00 | 1.00 | 2.00 | 2.00 | 2.00 | 2.00 |
| 141 | 1 | 1 | 2.00 | 2.00 | 2.00 | 2.00 | 2.00 | 2.00 |
| 142 | 1 | 3 | 1.00 | 2.00 | 2.00 | 2.00 | 2.00 | 2.00 |
| 143 | 1 | 1 | 1.00 | 1.00 | 1.00 | 2.00 | 2.00 | 1.00 |
| 144 | 1 | 2 | 2.00 | 1.00 | 2.00 | 2.00 | 1.00 | 2.00 |
| 145 | 1 | 2 | 1.00 | 2.00 | 2.00 | 2.00 | 2.00 | 2.00 |
| 146 | 1 | 2 | 2.00 | 3.00 | 2.00 | 3.00 | 2.00 | 2.00 |
| 268 | 1 | 1 | 1.00 | 2.00 | 2.00 | 2.00 | 1.00 | 2.00 |
| 148 | 1 | 2 | 2.00 | 1.00 | 2.00 | 2.00 | 2.00 | 2.00 |
| 149 | 1 | 4 | 1.00 | 1.00 | 2.00 | 3.00 | 2.00 | 2.00 |
| 150 | 1 | 2 | 1.00 | 1.00 | 2.00 | 2.00 | 2.00 | 2.00 |
| 151 | 1 | 2 | 2.00 | 3.00 | 2.00 | 2.00 | 2.00 | 2.00 |
| 152 | 1 | 2 | 1.00 | 1.00 | 1.00 | 2.00 | 2.00 | 2.00 |
| 153 | 1 | 1 | 2.00 | 1.00 | 2.00 | 2.00 | 2.00 | 2.00 |
| 154 | 1 | 1 | 2.00 | 2.00 | 2.00 | 2.00 | 2.00 | 2.00 |
| 155 | 1 | 1 | 1.00 | 2.00 | 2.00 | 2.00 | 2.00 | 2.00 |
| 156 | 1 | 4 | 1.00 | 3.00 | 1.00 | 2.00 | 2.00 | 2.00 |
| 508 | 1 | 1 | 2.00 | 3.00 | 2.00 | 3.00 | 1.00 | 2.00 |
| 157 | 1 | 1 | 1.00 | 2.00 | 2.00 | 3.00 | 2.00 | 2.00 |
| 158 | 1 | 1 | 1.00 | 2.00 | 2.00 | 2.00 | 1.00 | 2.00 |
| 159 | 1 | 1 | 2.00 | 3.00 | 2.00 | 2.00 | 2.00 | 2.00 |
| 160 | 1 | 1 | 1.00 | 3.00 | 2.00 | 2.00 | 1.00 | 2.00 |
| 161 | 1 | 1 | 2.00 | 1.00 | 2.00 | 2.00 | 1.00 | 2.00 |
| 162 | 1 | 1 | 2.00 | 1.00 | 2.00 | 2.00 | 1.00 | 2.00 |

|     |   |   |      |      |      |        |      |      |
|-----|---|---|------|------|------|--------|------|------|
| 163 | 1 | 1 | 1.00 | 1.00 | 2.00 | 2.00   | 1.00 | 2.00 |
| 164 | 1 | 1 | 1.00 | 1.00 | 2.00 | 2.00   | 2.00 | 2.00 |
| 165 | 1 | 2 | 1.00 | 2.00 | 2.00 | 2.00   | 1.00 | 2.00 |
| 166 | 1 | 3 | 2.00 | 3.00 | 1.00 | 3.00   | 2.00 | 2.00 |
| 167 | 1 | 4 | 1.00 | 1.00 | 2.00 | 2.00   | 1.00 | 2.00 |
| 168 | 1 | 1 | 2.00 | 1.00 | 2.00 | 3.00   | 1.00 | 2.00 |
| 169 | 1 | 1 | 2.00 | 2.00 | 2.00 | 3.00   | 2.00 | 2.00 |
| 170 | 1 | 1 | 1.00 | 2.00 | 1.00 | 2.00   | 1.00 | 2.00 |
| 171 | 1 | 4 | 2.00 | 3.00 | 2.00 | 3.00   | 2.00 | 2.00 |
| 172 | 1 | 3 | 1.00 | 3.00 | 2.00 | 2.00   | 2.00 | 2.00 |
| 173 | 1 | 2 | 2.00 | 3.00 | 2.00 | 2.00   | 2.00 | 2.00 |
| 174 | 1 | 2 | 1.00 | 2.00 | 2.00 | 2.00   | 2.00 | 2.00 |
| 175 | 1 | 2 | 2.00 | 1.00 | 2.00 | 2.00   | 2.00 | 2.00 |
| 176 | 1 | 1 | 1.00 | 2.00 | 2.00 | 2.00   | 1.00 | 2.00 |
| 177 | 1 | 2 | 1.00 | 3.00 | 2.00 | 2.00   | 2.00 | 2.00 |
| 178 | 1 | 2 | 2.00 | 1.00 | 2.00 | 2.00   | 2.00 | 2.00 |
| 179 | 1 | 1 | 1.00 | 2.00 | 2.00 | 2.00   | 1.00 | 2.00 |
| 180 | 1 | 4 | 2.00 | 3.00 | 1.00 | #NULL! | 2.00 | 2.00 |
| 181 | 1 | 4 | 1.00 | 2.00 | 2.00 | 2.00   | 2.00 | 2.00 |
| 182 | 1 | 3 | 2.00 | 3.00 | 2.00 | #NULL! | 3.00 | 2.00 |
| 183 | 1 | 4 | 1.00 | 2.00 | 2.00 | 2.00   | 3.00 | 2.00 |
| 184 | 1 | 2 | 1.00 | 2.00 | 2.00 | 2.00   | 2.00 | 2.00 |
| 185 | 1 | 3 | 2.00 | 3.00 | 1.00 | 2.00   | 3.00 | 2.00 |
| 186 | 1 | 4 | 2.00 | 2.00 | 2.00 | #NULL! | 2.00 | 2.00 |
| 187 | 1 | 2 | 1.00 | 2.00 | 1.00 | 3.00   | 2.00 | 2.00 |
| 188 | 1 | 3 | 1.00 | 2.00 | 2.00 | 2.00   | 2.00 | 2.00 |
| 189 | 1 | 1 | 2.00 | 2.00 | 2.00 | 2.00   | 1.00 | 1.00 |
| 190 | 1 | 2 | 1.00 | 2.00 | 1.00 | 1.00   | 2.00 | 2.00 |
| 578 | 1 | 4 | 2.00 | 1.00 | 2.00 | 2.00   | 2.00 | 2.00 |
| 577 | 1 | 2 | 1.00 | 2.00 | 2.00 | 2.00   | 2.00 | 1.00 |
| 576 | 1 | 4 | 2.00 | 3.00 | 2.00 | 2.00   | 3.00 | 2.00 |
| 575 | 1 | 1 | 1.00 | 3.00 | 1.00 | 2.00   | 2.00 | 2.00 |
| 574 | 1 | 4 | 2.00 | 1.00 | 2.00 | 2.00   | 2.00 | 2.00 |
| 200 | 1 | 1 | 2.00 | 3.00 | 2.00 | 3.00   | 2.00 | 2.00 |
| 202 | 1 | 1 | 1.00 | 2.00 | 2.00 | 2.00   | 1.00 | 2.00 |
| 204 | 1 | 2 | 1.00 | 1.00 | 2.00 | 2.00   | 2.00 | 2.00 |
| 205 | 1 | 2 | 2.00 | 3.00 | 2.00 | 3.00   | 2.00 | 2.00 |
| 206 | 1 | 2 | 1.00 | 2.00 | 2.00 | 1.00   | 2.00 | 2.00 |
| 207 | 1 | 1 | 1.00 | 1.00 | 2.00 | 2.00   | 1.00 | 2.00 |
| 208 | 1 | 2 | 2.00 | 3.00 | 2.00 | 2.00   | 2.00 | 2.00 |
| 209 | 1 | 2 | 2.00 | 3.00 | 2.00 | 2.00   | 1.00 | 2.00 |
| 210 | 1 | 1 | 1.00 | 1.00 | 2.00 | 2.00   | 1.00 | 2.00 |
| 211 | 1 | 2 | 2.00 | 2.00 | 2.00 | 2.00   | 2.00 | 1.00 |
| 212 | 1 | 2 | 2.00 | 2.00 | 2.00 | 2.00   | 2.00 | 2.00 |
| 220 | 1 | 2 | 1.00 | 2.00 | 2.00 | 2.00   | 2.00 | 2.00 |
| 213 | 1 | 2 | 2.00 | 3.00 | 2.00 | 2.00   | 2.00 | 2.00 |
| 214 | 1 | 1 | 2.00 | 3.00 | 2.00 | 2.00   | 2.00 | 2.00 |

|     |   |   |      |      |      |      |      |      |
|-----|---|---|------|------|------|------|------|------|
| 215 | 1 | 1 | 1.00 | 1.00 | 2.00 | 2.00 | 2.00 | 2.00 |
| 216 | 1 | 2 | 2.00 | 1.00 | 2.00 | 2.00 | 2.00 | 2.00 |
| 217 | 1 | 2 | 1.00 | 1.00 | 2.00 | 2.00 | 2.00 | 2.00 |
| 218 | 1 | 1 | 2.00 | 2.00 | 2.00 | 2.00 | 2.00 | 2.00 |
| 219 | 1 | 1 | 2.00 | 3.00 | 2.00 | 2.00 | 2.00 | 2.00 |
| 220 | 1 | 2 | 1.00 | 2.00 | 2.00 | 2.00 | 2.00 | 2.00 |
| 221 | 1 | 2 | 1.00 | 2.00 | 1.00 | 2.00 | 2.00 | 2.00 |
| 222 | 1 | 1 | 2.00 | 1.00 | 2.00 | 2.00 | 1.00 | 2.00 |
| 223 | 1 | 1 | 1.00 | 3.00 | 2.00 | 2.00 | 2.00 | 2.00 |
| 224 | 1 | 1 | 2.00 | 1.00 | 2.00 | 2.00 | 1.00 | 2.00 |
| 225 | 1 | 1 | 1.00 | 2.00 | 2.00 | 2.00 | 1.00 | 2.00 |
| 226 | 1 | 1 | 2.00 | 3.00 | 2.00 | 2.00 | 2.00 | 2.00 |
| 227 | 1 | 1 | 1.00 | 2.00 | 2.00 | 2.00 | 1.00 | 2.00 |
| 228 | 1 | 1 | 2.00 | 3.00 | 2.00 | 2.00 | 1.00 | 2.00 |
| 229 | 1 | 4 | 1.00 | 3.00 | 2.00 | 2.00 | 1.00 | 2.00 |
| 230 | 1 | 3 | 2.00 | 3.00 | 2.00 | 2.00 | 2.00 | 2.00 |
| 231 | 1 | 2 | 2.00 | 2.00 | 2.00 | 2.00 | 2.00 | 2.00 |
| 232 | 1 | 1 | 1.00 | 1.00 | 2.00 | 2.00 | 2.00 | 2.00 |
| 233 | 1 | 3 | 2.00 | 1.00 | 2.00 | 2.00 | 2.00 | 2.00 |
| 234 | 1 | 1 | 2.00 | 2.00 | 2.00 | 2.00 | 1.00 | 2.00 |
| 235 | 1 | 1 | 1.00 | 2.00 | 2.00 | 2.00 | 2.00 | 2.00 |
| 236 | 1 | 3 | 2.00 | 3.00 | 2.00 | 2.00 | 2.00 | 2.00 |
| 237 | 1 | 1 | 2.00 | 2.00 | 2.00 | 2.00 | 2.00 | 2.00 |
| 238 | 1 | 2 | 1.00 | 1.00 | 2.00 | 3.00 | 2.00 | 2.00 |
| 239 | 1 | 2 | 1.00 | 1.00 | 2.00 | 2.00 | 1.00 | 2.00 |
| 240 | 1 | 2 | 2.00 | 1.00 | 2.00 | 2.00 | 2.00 | 2.00 |
| 241 | 1 | 1 | 1.00 | 2.00 | 2.00 | 3.00 | 1.00 | 2.00 |
| 242 | 1 | 2 | 2.00 | 2.00 | 2.00 | 3.00 | 2.00 | 2.00 |
| 243 | 1 | 3 | 2.00 | 1.00 | 2.00 | 2.00 | 3.00 | 2.00 |
| 244 | 1 | 3 | 2.00 | 3.00 | 2.00 | 2.00 | 1.00 | 1.00 |
| 245 | 1 | 3 | 1.00 | 1.00 | 2.00 | 2.00 | 2.00 | 2.00 |
| 431 | 1 | 1 | 1.00 | 1.00 | 2.00 | 2.00 | 2.00 | 2.00 |
| 432 | 1 | 1 | 2.00 | 2.00 | 2.00 | 2.00 | 2.00 | 2.00 |
| 433 | 1 | 2 | 2.00 | 3.00 | 2.00 | 2.00 | 2.00 | 2.00 |
| 434 | 1 | 2 | 1.00 | 2.00 | 1.00 | 2.00 | 2.00 | 2.00 |
| 435 | 1 | 3 | 2.00 | 2.00 | 2.00 | 3.00 | 2.00 | 2.00 |
| 436 | 1 | 2 | 1.00 | 3.00 | 2.00 | 3.00 | 1.00 | 2.00 |
| 437 | 1 | 1 | 1.00 | 2.00 | 2.00 | 2.00 | 2.00 | 2.00 |
| 438 | 1 | 4 | 1.00 | 2.00 | 2.00 | 2.00 | 2.00 | 2.00 |
| 439 | 1 | 1 | 2.00 | 3.00 | 2.00 | 2.00 | 2.00 | 2.00 |
| 440 | 1 | 2 | 2.00 | 2.00 | 2.00 | 2.00 | 2.00 | 2.00 |
| 441 | 1 | 1 | 1.00 | 2.00 | 2.00 | 2.00 | 2.00 | 2.00 |
| 442 | 1 | 3 | 2.00 | 2.00 | 2.00 | 2.00 | 2.00 | 2.00 |
| 443 | 1 | 3 | 2.00 | 2.00 | 2.00 | 2.00 | 2.00 | 2.00 |
| 444 | 1 | 2 | 2.00 | 2.00 | 2.00 | 2.00 | 2.00 | 2.00 |
| 445 | 1 | 2 | 1.00 | 1.00 | 2.00 | 2.00 | 2.00 | 2.00 |
| 446 | 1 | 4 | 1.00 | 2.00 | 2.00 | 2.00 | 2.00 | 2.00 |

|     |   |   |      |      |      |      |      |      |
|-----|---|---|------|------|------|------|------|------|
| 447 | 1 | 1 | 2.00 | 3.00 | 2.00 | 2.00 | 2.00 | 2.00 |
| 448 | 1 | 2 | 1.00 | 1.00 | 2.00 | 2.00 | 2.00 | 2.00 |
| 449 | 1 | 3 | 2.00 | 2.00 | 2.00 | 2.00 | 2.00 | 2.00 |
| 450 | 1 | 1 | 2.00 | 2.00 | 2.00 | 2.00 | 1.00 | 2.00 |
| 451 | 1 | 1 | 1.00 | 3.00 | 2.00 | 2.00 | 1.00 | 2.00 |
| 452 | 1 | 1 | 2.00 | 3.00 | 2.00 | 2.00 | 2.00 | 2.00 |
| 453 | 1 | 1 | 2.00 | 3.00 | 2.00 | 2.00 | 2.00 | 2.00 |
| 454 | 1 | 1 | 1.00 | 1.00 | 2.00 | 2.00 | 2.00 | 2.00 |
| 455 | 1 | 1 | 2.00 | 3.00 | 2.00 | 2.00 | 2.00 | 2.00 |
| 456 | 1 | 1 | 1.00 | 2.00 | 2.00 | 2.00 | 1.00 | 2.00 |
| 457 | 1 | 1 | 1.00 | 2.00 | 2.00 | 2.00 | 2.00 | 2.00 |
| 458 | 1 | 2 | 2.00 | 1.00 | 2.00 | 2.00 | 2.00 | 2.00 |
| 459 | 1 | 1 | 1.00 | 2.00 | 2.00 | 2.00 | 2.00 | 2.00 |
| 460 | 1 | 3 | 1.00 | 2.00 | 2.00 | 2.00 | 2.00 | 2.00 |
| 461 | 1 | 4 | 1.00 | 3.00 | 2.00 | 2.00 | 2.00 | 2.00 |
| 462 | 1 | 1 | 2.00 | 3.00 | 2.00 | 3.00 | 2.00 | 2.00 |
| 463 | 1 | 4 | 2.00 | 1.00 | 2.00 | 3.00 | 2.00 | 2.00 |
| 464 | 1 | 2 | 1.00 | 1.00 | 2.00 | 2.00 | 2.00 | 2.00 |
| 465 | 1 | 2 | 2.00 | 2.00 | 2.00 | 2.00 | 2.00 | 2.00 |
| 466 | 1 | 3 | 2.00 | 3.00 | 2.00 | 2.00 | 2.00 | 2.00 |
| 467 | 1 | 1 | 1.00 | 2.00 | 2.00 | 2.00 | 2.00 | 2.00 |
| 246 | 1 | 1 | 2.00 | 3.00 | 2.00 | 2.00 | 2.00 | 2.00 |
| 247 | 1 | 1 | 2.00 | 3.00 | 2.00 | 2.00 | 2.00 | 2.00 |
| 248 | 1 | 1 | 1.00 | 1.00 | 2.00 | 2.00 | 2.00 | 2.00 |
| 249 | 1 | 1 | 1.00 | 2.00 | 2.00 | 2.00 | 2.00 | 2.00 |
| 250 | 1 | 3 | 2.00 | 2.00 | 2.00 | 2.00 | 2.00 | 2.00 |
| 251 | 1 | 3 | 2.00 | 1.00 | 2.00 | 2.00 | 2.00 | 2.00 |
| 252 | 1 | 4 | 1.00 | 1.00 | 2.00 | 2.00 | 3.00 | 2.00 |
| 253 | 1 | 1 | 2.00 | 1.00 | 2.00 | 2.00 | 2.00 | 2.00 |
| 254 | 1 | 1 | 1.00 | 1.00 | 1.00 | 2.00 | 2.00 | 2.00 |
| 255 | 1 | 2 | 1.00 | 3.00 | 2.00 | 2.00 | 1.00 | 2.00 |
| 256 | 1 | 1 | 1.00 | 2.00 | 2.00 | 2.00 | 2.00 | 2.00 |
| 257 | 1 | 1 | 2.00 | 3.00 | 2.00 | 2.00 | 2.00 | 1.00 |
| 258 | 1 | 4 | 2.00 | 1.00 | 2.00 | 2.00 | 2.00 | 2.00 |
| 259 | 1 | 4 | 2.00 | 1.00 | 2.00 | 2.00 | 2.00 | 2.00 |
| 260 | 1 | 1 | 1.00 | 3.00 | 2.00 | 2.00 | 2.00 | 2.00 |
| 261 | 1 | 1 | 1.00 | 1.00 | 2.00 | 2.00 | 2.00 | 2.00 |
| 262 | 1 | 1 | 1.00 | 1.00 | 2.00 | 2.00 | 2.00 | 2.00 |
| 263 | 1 | 3 | 1.00 | 1.00 | 1.00 | 2.00 | 2.00 | 2.00 |
| 264 | 1 | 1 | 1.00 | 1.00 | 2.00 | 2.00 | 2.00 | 2.00 |
| 265 | 1 | 3 | 2.00 | 3.00 | 2.00 | 3.00 | 3.00 | 2.00 |
| 266 | 1 | 1 | 1.00 | 2.00 | 2.00 | 2.00 | 2.00 | 2.00 |
| 267 | 1 | 1 | 2.00 | 2.00 | 2.00 | 2.00 | 2.00 | 2.00 |
| 268 | 1 | 1 | 2.00 | 2.00 | 2.00 | 2.00 | 1.00 | 2.00 |
| 269 | 1 | 1 | 1.00 | 1.00 | 2.00 | 2.00 | 1.00 | 2.00 |
| 270 | 1 | 1 | 1.00 | 2.00 | 2.00 | 2.00 | 3.00 | 2.00 |
| 271 | 1 | 1 | 1.00 | 2.00 | 2.00 | 2.00 | 2.00 | 2.00 |

|     |   |   |      |      |      |        |      |      |
|-----|---|---|------|------|------|--------|------|------|
| 272 | 1 | 1 | 2.00 | 3.00 | 2.00 | 2.00   | 2.00 | 2.00 |
| 273 | 1 | 1 | 2.00 | 3.00 | 2.00 | 2.00   | 2.00 | 2.00 |
| 274 | 1 | 2 | 1.00 | 2.00 | 2.00 | 2.00   | 1.00 | 2.00 |
| 275 | 1 | 2 | 2.00 | 3.00 | 2.00 | 2.00   | 2.00 | 2.00 |
| 276 | 1 | 2 | 1.00 | 1.00 | 2.00 | 2.00   | 1.00 | 2.00 |
| 277 | 1 | 2 | 2.00 | 3.00 | 2.00 | 1.00   | 1.00 | 2.00 |
| 278 | 1 | 2 | 1.00 | 2.00 | 2.00 | 2.00   | 2.00 | 2.00 |
| 279 | 1 | 4 | 2.00 | 3.00 | 2.00 | 3.00   | 3.00 | 2.00 |
| 468 | 1 | 3 | 1.00 | 2.00 | 1.00 | #NULL! | 2.00 | 2.00 |
| 469 | 1 | 4 | 2.00 | 1.00 | 2.00 | 2.00   | 2.00 | 2.00 |
| 470 | 1 | 4 | 1.00 | 1.00 | 2.00 | 2.00   | 3.00 | 2.00 |
| 471 | 1 | 3 | 2.00 | 1.00 | 2.00 | 3.00   | 3.00 | 2.00 |
| 472 | 1 | 2 | 1.00 | 2.00 | 2.00 | 2.00   | 2.00 | 2.00 |
| 473 | 1 | 2 | 2.00 | 2.00 | 1.00 | 2.00   | 2.00 | 2.00 |
| 474 | 1 | 2 | 1.00 | 1.00 | 2.00 | 2.00   | 2.00 | 2.00 |
| 475 | 1 | 1 | 2.00 | 3.00 | 2.00 | 3.00   | 2.00 | 2.00 |
| 476 | 1 | 4 | 1.00 | 2.00 | 2.00 | 2.00   | 2.00 | 2.00 |
| 477 | 1 | 2 | 1.00 | 2.00 | 2.00 | 2.00   | 2.00 | 2.00 |
| 478 | 1 | 3 | 1.00 | 2.00 | 2.00 | 2.00   | 2.00 | 2.00 |
| 479 | 1 | 1 | 2.00 | 2.00 | 2.00 | 2.00   | 2.00 | 2.00 |
| 480 | 1 | 2 | 1.00 | 2.00 | 2.00 | 2.00   | 2.00 | 2.00 |
| 481 | 1 | 2 | 2.00 | 3.00 | 1.00 | 2.00   | 2.00 | 2.00 |
| 482 | 1 | 1 | 1.00 | 2.00 | 2.00 | 2.00   | 1.00 | 2.00 |
| 483 | 1 | 1 | 1.00 | 1.00 | 1.00 | 2.00   | 2.00 | 2.00 |
| 484 | 1 | 4 | 2.00 | 3.00 | 2.00 | 3.00   | 2.00 | 2.00 |
| 485 | 1 | 1 | 1.00 | 2.00 | 2.00 | 2.00   | 1.00 | 2.00 |
| 486 | 1 | 2 | 1.00 | 2.00 | 2.00 | 2.00   | 2.00 | 2.00 |
| 487 | 1 | 1 | 1.00 | 1.00 | 2.00 | 2.00   | 2.00 | 2.00 |
| 488 | 1 | 1 | 2.00 | 1.00 | 2.00 | 2.00   | 1.00 | 2.00 |
| 489 | 1 | 4 | 2.00 | 3.00 | 2.00 | 2.00   | 2.00 | 2.00 |
| 490 | 1 | 1 | 1.00 | 2.00 | 2.00 | 3.00   | 2.00 | 2.00 |
| 491 | 1 | 1 | 1.00 | 3.00 | 2.00 | 2.00   | 2.00 | 2.00 |
| 492 | 1 | 1 | 2.00 | 1.00 | 2.00 | 2.00   | 1.00 | 2.00 |
| 493 | 1 | 2 | 2.00 | 3.00 | 2.00 | 2.00   | 1.00 | 2.00 |
| 494 | 1 | 4 | 1.00 | 1.00 | 2.00 | 2.00   | 3.00 | 2.00 |
| 495 | 1 | 1 | 1.00 | 1.00 | 2.00 | 2.00   | 1.00 | 2.00 |
| 496 | 1 | 1 | 2.00 | 3.00 | 2.00 | 2.00   | 1.00 | 2.00 |
| 497 | 1 | 3 | 1.00 | 1.00 | 2.00 | 2.00   | 2.00 | 2.00 |
| 498 | 1 | 4 | 2.00 | 1.00 | 2.00 | 2.00   | 2.00 | 2.00 |
| 499 | 1 | 1 | 1.00 | 1.00 | 2.00 | 2.00   | 1.00 | 2.00 |
| 500 | 1 | 2 | 2.00 | 3.00 | 2.00 | 2.00   | 2.00 | 2.00 |
| 501 | 1 | 3 | 1.00 | 2.00 | 2.00 | 2.00   | 2.00 | 2.00 |
| 502 | 1 | 1 | 1.00 | 2.00 | 2.00 | 2.00   | 1.00 | 2.00 |
| 503 | 1 | 4 | 2.00 | 3.00 | 1.00 | 2.00   | 2.00 | 2.00 |
| 504 | 1 | 1 | 2.00 | 2.00 | 2.00 | 2.00   | 1.00 | 2.00 |
| 505 | 1 | 4 | 1.00 | 3.00 | 1.00 | 2.00   | 2.00 | 2.00 |
| 506 | 1 | 3 | 2.00 | 2.00 | 2.00 | 3.00   | 2.00 | 2.00 |

|     |   |   |      |      |      |        |      |      |
|-----|---|---|------|------|------|--------|------|------|
| 507 | 1 | 1 | 1.00 | 2.00 | 2.00 | 3.00   | 2.00 | 2.00 |
| 509 | 1 | 1 | 2.00 | 3.00 | 2.00 | 2.00   | 2.00 | 2.00 |
| 510 | 1 | 3 | 1.00 | 2.00 | 2.00 | 2.00   | 2.00 | 2.00 |
| 511 | 1 | 3 | 2.00 | 2.00 | 2.00 | 2.00   | 2.00 | 2.00 |
| 512 | 1 | 1 | 2.00 | 3.00 | 2.00 | #NULL! | 2.00 | 2.00 |
| 513 | 1 | 3 | 1.00 | 1.00 | 2.00 | 2.00   | 2.00 | 2.00 |
| 514 | 1 | 4 | 1.00 | 2.00 | 2.00 | 2.00   | 2.00 | 2.00 |
| 515 | 1 | 4 | 2.00 | 3.00 | 2.00 | #NULL! | 2.00 | 2.00 |
| 516 | 1 | 1 | 1.00 | 1.00 | 2.00 | 2.00   | 2.00 | 2.00 |
| 517 | 1 | 3 | 2.00 | 2.00 | 2.00 | 2.00   | 2.00 | 2.00 |
| 518 | 1 | 2 | 2.00 | 3.00 | 2.00 | 2.00   | 1.00 | 2.00 |
| 519 | 1 | 2 | 2.00 | 2.00 | 2.00 | 2.00   | 2.00 | 2.00 |
| 520 | 1 | 2 | 1.00 | 2.00 | 2.00 | 2.00   | 2.00 | 2.00 |
| 521 | 1 | 4 | 1.00 | 2.00 | 2.00 | 2.00   | 3.00 | 2.00 |
| 522 | 1 | 2 | 2.00 | 1.00 | 2.00 | 2.00   | 1.00 | 2.00 |
| 523 | 1 | 1 | 2.00 | 2.00 | 2.00 | 2.00   | 1.00 | 2.00 |
| 524 | 1 | 3 | 2.00 | 1.00 | 2.00 | 3.00   | 2.00 | 2.00 |
| 525 | 1 | 3 | 1.00 | 2.00 | 2.00 | 2.00   | 2.00 | 2.00 |
| 526 | 1 | 1 | 1.00 | 1.00 | 2.00 | 2.00   | 1.00 | 2.00 |
| 527 | 1 | 1 | 2.00 | 1.00 | 2.00 | 3.00   | 1.00 | 2.00 |
| 528 | 1 | 1 | 1.00 | 2.00 | 2.00 | 2.00   | 2.00 | 2.00 |
| 529 | 1 | 2 | 2.00 | 3.00 | 2.00 | 2.00   | 2.00 | 2.00 |
| 530 | 1 | 3 | 2.00 | 3.00 | 2.00 | #NULL! | 2.00 | 2.00 |
| 531 | 1 | 1 | 1.00 | 1.00 | 2.00 | 2.00   | 1.00 | 2.00 |
| 532 | 1 | 3 | 2.00 | 1.00 | 2.00 | 3.00   | 2.00 | 2.00 |
| 533 | 1 | 3 | 1.00 | 1.00 | 1.00 | 2.00   | 2.00 | 2.00 |
| 534 | 1 | 1 | 1.00 | 2.00 | 2.00 | 2.00   | 2.00 | 2.00 |
| 535 | 1 | 2 | 2.00 | 1.00 | 2.00 | 2.00   | 1.00 | 2.00 |
| 536 | 1 | 1 | 2.00 | 3.00 | 2.00 | 2.00   | 2.00 | 2.00 |
| 537 | 1 | 2 | 1.00 | 1.00 | 2.00 | 2.00   | 1.00 | 2.00 |
| 538 | 1 | 3 | 1.00 | 2.00 | 2.00 | 2.00   | 2.00 | 2.00 |
| 539 | 1 | 1 | 2.00 | 3.00 | 1.00 | 2.00   | 2.00 | 2.00 |
| 540 | 1 | 3 | 2.00 | 3.00 | 2.00 | 2.00   | 2.00 | 2.00 |
| 541 | 1 | 4 | 1.00 | 2.00 | 2.00 | 2.00   | 2.00 | 2.00 |
| 542 | 1 | 4 | 2.00 | 3.00 | 2.00 | 2.00   | 1.00 | 2.00 |
| 543 | 1 | 2 | 2.00 | 3.00 | 2.00 | 2.00   | 1.00 | 2.00 |
| 544 | 1 | 4 | 1.00 | 2.00 | 2.00 | 3.00   | 3.00 | 2.00 |
| 545 | 1 | 1 | 2.00 | 3.00 | 2.00 | 2.00   | 1.00 | 2.00 |
| 546 | 1 | 2 | 1.00 | 1.00 | 2.00 | 2.00   | 2.00 | 2.00 |
| 547 | 1 | 3 | 2.00 | 3.00 | 2.00 | 3.00   | 2.00 | 2.00 |
| 548 | 1 | 4 | 1.00 | 2.00 | 2.00 | 2.00   | 2.00 | 2.00 |
| 549 | 1 | 4 | 1.00 | 2.00 | 2.00 | 2.00   | 3.00 | 2.00 |
| 550 | 1 | 4 | 2.00 | 3.00 | 2.00 | 2.00   | 2.00 | 2.00 |
| 551 | 1 | 1 | 1.00 | 1.00 | 2.00 | 2.00   | 2.00 | 2.00 |
| 552 | 1 | 3 | 2.00 | 1.00 | 2.00 | 2.00   | 2.00 | 2.00 |
| 553 | 1 | 4 | 1.00 | 1.00 | 2.00 | 2.00   | 2.00 | 2.00 |
| 554 | 1 | 2 | 2.00 | 3.00 | 2.00 | 3.00   | 2.00 | 2.00 |

|     |   |   |      |      |      |        |      |      |
|-----|---|---|------|------|------|--------|------|------|
| 555 | 1 | 3 | 2.00 | 3.00 | 2.00 | 3.00   | 2.00 | 2.00 |
| 556 | 1 | 4 | 1.00 | 2.00 | 2.00 | 2.00   | 2.00 | 2.00 |
| 557 | 1 | 3 | 1.00 | 2.00 | 2.00 | 2.00   | 2.00 | 2.00 |
| 558 | 1 | 2 | 1.00 | 1.00 | 2.00 | 2.00   | 2.00 | 2.00 |
| 559 | 1 | 1 | 2.00 | 3.00 | 2.00 | #NULL! | 2.00 | 2.00 |
| 560 | 1 | 2 | 1.00 | 2.00 | 2.00 | #NULL! | 1.00 | 2.00 |
| 561 | 1 | 3 | 2.00 | 3.00 | 2.00 | 3.00   | 2.00 | 2.00 |
| 562 | 1 | 2 | 1.00 | 2.00 | 2.00 | 2.00   | 2.00 | 1.00 |
| 573 | 1 | 2 | 2.00 | 3.00 | 2.00 | 2.00   | 3.00 | 2.00 |
| 563 | 1 | 2 | 1.00 | 2.00 | 2.00 | 2.00   | 1.00 | 2.00 |
| 565 | 1 | 4 | 2.00 | 3.00 | 2.00 | #NULL! | 2.00 | 2.00 |
| 566 | 1 | 2 | 1.00 | 1.00 | 2.00 | 3.00   | 2.00 | 2.00 |
| 567 | 1 | 3 | 1.00 | 2.00 | 2.00 | 2.00   | 2.00 | 1.00 |
| 568 | 1 | 2 | 2.00 | 1.00 | 2.00 | 2.00   | 3.00 | 2.00 |
| 569 | 1 | 2 | 1.00 | 1.00 | 2.00 | 2.00   | 2.00 | 2.00 |
| 570 | 1 | 4 | 2.00 | 3.00 | 2.00 | 2.00   | 2.00 | 2.00 |
| 571 | 1 | 2 | 1.00 | 2.00 | 2.00 | 2.00   | 2.00 | 2.00 |
| 572 | 1 | 4 | 2.00 | 1.00 | 2.00 | 3.00   | 2.00 | 2.00 |
| 283 | 1 | 3 | 2.00 | 2.00 | 2.00 | 2.00   | 1.00 | 2.00 |
| 284 | 1 | 4 | 1.00 | 2.00 | 2.00 | 2.00   | 2.00 | 2.00 |
| 285 | 1 | 3 | 1.00 | 1.00 | 2.00 | 2.00   | 1.00 | 2.00 |
| 286 | 1 | 4 | 2.00 | 3.00 | 2.00 | 2.00   | 3.00 | 2.00 |
| 287 | 1 | 4 | 2.00 | 3.00 | 2.00 | 2.00   | 2.00 | 2.00 |
| 288 | 1 | 1 | 1.00 | 2.00 | 2.00 | 2.00   | 1.00 | 2.00 |
| 289 | 1 | 4 | 2.00 | 3.00 | 2.00 | 2.00   | 3.00 | 2.00 |
| 290 | 1 | 1 | 1.00 | 3.00 | 1.00 | 2.00   | 2.00 | 2.00 |
| 291 | 1 | 4 | 2.00 | 3.00 | 2.00 | 2.00   | 3.00 | 1.00 |
| 292 | 1 | 2 | 1.00 | 2.00 | 2.00 | 2.00   | 2.00 | 1.00 |
| 293 | 1 | 4 | 1.00 | 2.00 | 2.00 | 2.00   | 3.00 | 2.00 |
| 294 | 1 | 2 | 2.00 | 3.00 | 2.00 | 2.00   | 2.00 | 2.00 |
| 295 | 1 | 3 | 2.00 | 3.00 | 2.00 | 2.00   | 2.00 | 2.00 |
| 296 | 1 | 3 | 1.00 | 2.00 | 2.00 | 2.00   | 2.00 | 2.00 |
| 415 | 1 | 1 | 2.00 | 3.00 | 2.00 | 2.00   | 1.00 | 2.00 |
| 416 | 1 | 1 | 1.00 | 2.00 | 2.00 | 2.00   | 2.00 | 2.00 |
| 417 | 1 | 1 | 1.00 | 1.00 | 2.00 | 2.00   | 2.00 | 2.00 |
| 418 | 1 | 2 | 2.00 | 1.00 | 2.00 | 2.00   | 1.00 | 2.00 |
| 419 | 1 | 2 | 2.00 | 1.00 | 1.00 | 2.00   | 2.00 | 2.00 |
| 420 | 1 | 1 | 1.00 | 3.00 | 1.00 | 2.00   | 2.00 | 2.00 |
| 421 | 1 | 1 | 2.00 | 3.00 | 2.00 | 2.00   | 2.00 | 2.00 |
| 422 | 1 | 1 | 1.00 | 1.00 | 2.00 | 2.00   | 2.00 | 2.00 |
| 423 | 1 | 2 | 2.00 | 1.00 | 2.00 | 2.00   | 2.00 | 2.00 |
| 424 | 1 | 1 | 1.00 | 2.00 | 2.00 | 2.00   | 2.00 | 2.00 |
| 425 | 1 | 1 | 1.00 | 1.00 | 2.00 | 2.00   | 2.00 | 2.00 |
| 426 | 1 | 1 | 1.00 | 2.00 | 2.00 | 2.00   | 2.00 | 2.00 |
| 427 | 1 | 1 | 1.00 | 1.00 | 2.00 | 2.00   | 2.00 | 2.00 |
| 428 | 1 | 2 | 1.00 | 1.00 | 2.00 | 2.00   | 2.00 | 2.00 |
| 429 | 1 | 4 | 2.00 | 2.00 | 2.00 | 2.00   | 2.00 | 2.00 |

|        |   |   |      |      |      |      |      |      |
|--------|---|---|------|------|------|------|------|------|
| 430    | 1 | 1 | 1.00 | 1.00 | 2.00 | 2.00 | 2.00 | 2.00 |
| 94     | 1 | 1 | 2.00 | 1.00 | 1.00 | 2.00 | 2.00 | 2.00 |
| 95     | 1 | 1 | 1.00 | 1.00 | 2.00 | 2.00 | 1.00 | 2.00 |
| 96     | 1 | 1 | 2.00 | 1.00 | 2.00 | 2.00 | 2.00 | 2.00 |
| 97     | 1 | 3 | 1.00 | 3.00 | 2.00 | 2.00 | 2.00 | 2.00 |
| 98     | 1 | 2 | 2.00 | 3.00 | 2.00 | 2.00 | 2.00 | 2.00 |
| 99     | 1 | 1 | 1.00 | 2.00 | 1.00 | 2.00 | 2.00 | 2.00 |
| 100    | 1 | 1 | 2.00 | 2.00 | 2.00 | 2.00 | 2.00 | 2.00 |
| 101    | 1 | 4 | 1.00 | 1.00 | 2.00 | 2.00 | 2.00 | 2.00 |
| 102    | 1 | 1 | 2.00 | 2.00 | 2.00 | 2.00 | 2.00 | 2.00 |
| 103    | 1 | 2 | 2.00 | 1.00 | 2.00 | 2.00 | 2.00 | 2.00 |
| 104    | 1 | 2 | 1.00 | 1.00 | 2.00 | 2.00 | 2.00 | 2.00 |
| #NULL! | 1 | 2 | 1.00 | 1.00 | 2.00 | 2.00 | 2.00 | 1.00 |
| 114    | 1 | 2 | 2.00 | 1.00 | 2.00 | 3.00 | 2.00 | 2.00 |



| BIRTHSPAC | EDUCATIO | MATERNAL | MATERNAL | MONTHS | WEIGHT | HEIGHT | WAZNCHS | HAZNCHS |
|-----------|----------|----------|----------|--------|--------|--------|---------|---------|
| 2.00      | 1.00     | 3.00     | 2.00     | 21     | 12.90  | 88.0   | 1.2740  | 1.3180  |
| 2.00      | 1.00     | 2.00     | 1.00     | 11     | 9.10   | 72.2   | -0.1390 | -0.3080 |
| 1.00      | 2.00     | 3.00     | 2.00     | 21     | 10.40  | 86.5   | -0.8040 | 0.8470  |
| 1.00      | 1.00     | 3.00     | 2.00     | 8      | 7.50   | 70.3   | -1.3290 | -0.2510 |
| 2.00      | 1.00     | 3.00     | 2.00     | 2      | 5.20   | 59.6   | 0.0110  | 0.5890  |
| 2.00      | 1.00     | 2.00     | 1.00     | 6      | 8.90   | 70.0   | 1.0850  | 0.8120  |
| 1.00      | 2.00     | 2.00     | 1.00     | 12     | 8.90   | 78.9   | -0.6020 | 1.6230  |
| 1.00      | 2.00     | 3.00     | 2.00     | 13     | 8.20   | 74.0   | -1.4840 | -0.5220 |
| 2.00      | 2.00     | 2.00     | 1.00     | 4      | 7.40   | 65.5   | 0.7830  | 0.6740  |
| 1.00      | 2.00     | 2.00     | 1.00     | 7      | 7.20   | 68.0   | -1.1780 | -0.5560 |
| 1.00      | 1.00     | 3.00     | 2.00     | 4      | 7.10   | 61.5   | 0.4570  | -0.8180 |
| 2.00      | 1.00     | 1.00     | 1.00     | 4      | 8.30   | 68.2   | 1.7630  | 1.6800  |
| 1.00      | 1.00     | 1.00     | 1.00     | 5      | 7.40   | 64.2   | 0.1090  | -0.6350 |
| 1.00      | 1.00     | 2.00     | 1.00     | 8      | 6.90   | 67.9   | -1.9510 | -1.1560 |
| 2.00      | 1.00     | 2.00     | 1.00     | 3      | 4.10   | 54.9   | -1.9780 | -2.3480 |
| 1.00      | 1.00     | 2.00     | 1.00     | 5      | 6.20   | 64.1   | -0.5430 | 0.0070  |
| 2.00      | 1.00     | 1.00     | 1.00     | 6      | 8.20   | 64.6   | 0.3650  | -1.1990 |
| 1.00      | 1.00     | 1.00     | 1.00     | 11     | 6.60   | 62.8   | -2.5840 | -3.6680 |
| 1.00      | 2.00     | 3.00     | 2.00     | 3      | 6.70   | 59.2   | 0.8260  | -0.7210 |
| 2.00      | 1.00     | 2.00     | 1.00     | 3      | 6.70   | 61.2   | 0.8260  | 0.0360  |
| 2.00      | 1.00     | 1.00     | 1.00     | 5      | 7.30   | 66.0   | 0.7280  | 0.7370  |
| 1.00      | 1.00     | 1.00     | 1.00     | 8      | 7.50   | 66.0   | -0.7030 | -1.1330 |
| 2.00      | 1.00     | 3.00     | 2.00     | 8      | 9.70   | 73.3   | 0.9030  | 0.8790  |
| 1.00      | 2.00     | 4.00     | 2.00     | 12     | 8.90   | 83.7   | -1.2320 | 2.8240  |
| 2.00      | 1.00     | 2.00     | 1.00     | 19     | 9.30   | 75.0   | -1.4430 | -2.2240 |
| 2.00      | 1.00     | 3.00     | 2.00     | 7      | 7.30   | 62.2   | -0.4520 | -2.0100 |
| 2.00      | 1.00     | 4.00     | 2.00     | 4      | 7.30   | 65.3   | 1.4860  | 1.3050  |
| 1.00      | 1.00     | 2.00     | 1.00     | 9      | 9.00   | 76.4   | -0.1870 | 1.5380  |
| 2.00      | 1.00     | 2.00     | 1.00     | 13     | 10.50  | 79.9   | 0.0770  | 0.9720  |
| 1.00      | 1.00     | 3.00     | 2.00     | 8      | 9.70   | 71.7   | 1.5900  | 0.9750  |
| 1.00      | 1.00     | 1.00     | 1.00     | 8      | 7.70   | 69.4   | -1.1220 | -0.5910 |
| 2.00      | 1.00     | 2.00     | 1.00     | 7      | 8.20   | 67.9   | -0.1440 | -0.5930 |
| 2.00      | 1.00     | 3.00     | 2.00     | 11     | 9.40   | 74.8   | -0.4630 | -0.0310 |
| 2.00      | 1.00     | 2.00     | 1.00     | 11     | 8.00   | 65.4   | -1.8700 | -3.5590 |
| 1.00      | 1.00     | 3.00     | 2.00     | 11     | 9.30   | 68.3   | 0.0560  | -1.7020 |
| 1.00      | 2.00     | 3.00     | 2.00     | 6      | 9.20   | 70.4   | 1.3940  | 0.9610  |
| 2.00      | 2.00     | 2.00     | 1.00     | 20     | 13.50  | 78.0   | 1.3180  | -1.9720 |
| 1.00      | 1.00     | 1.00     | 1.00     | 18     | 10.90  | 78.0   | 0.0660  | -0.9530 |
| 1.00      | 1.00     | 1.00     | 1.00     | 11     | 7.50   | 73.0   | -2.3720 | -0.7060 |
| 1.00      | 1.00     | 3.00     | 2.00     | 10     | 8.00   | 76.0   | -1.5710 | 0.8940  |
| 2.00      | 1.00     | 3.00     | 2.00     | 24     | 12.00  | 87.0   | -0.3040 | 0.4420  |
| 1.00      | 1.00     | 2.00     | 1.00     | 12     | 9.50   | 74.2   | -0.6410 | -0.6990 |
| 2.00      | 1.00     | 2.00     | 1.00     | 12     | 9.30   | 75.0   | -0.8380 | -0.4020 |
| 2.00      | 1.00     | 3.00     | 2.00     | 23     | 9.90   | 75.9   | -1.4900 | -2.9890 |
| 2.00      | 1.00     | 2.00     | 1.00     | 24     | 12.00  | 84.3   | -0.3040 | -0.4060 |
| 2.00      | 1.00     | 3.00     | 2.00     | 13     | 12.00  | 84.3   | 1.4020  | 2.5790  |

|      |      |      |      |    |       |      |         |         |
|------|------|------|------|----|-------|------|---------|---------|
| 2.00 | 1.00 | 2.00 | 1.00 | 24 | 13.10 | 75.6 | 0.4530  | -3.1370 |
| 1.00 | 1.00 | 1.00 | 1.00 | 7  | 7.40  | 68.2 | -0.9710 | -0.4810 |
| 2.00 | 1.00 | 2.00 | 1.00 | 5  | 5.50  | 69.3 | -1.8170 | 1.2580  |
| 2.00 | 1.00 | 1.00 | 1.00 | 6  | 6.90  | 69.3 | -0.3540 | 1.2740  |
| 1.00 | 1.00 | 3.00 | 2.00 | 6  | 6.20  | 66.4 | -1.1580 | 0.1770  |
| 2.00 | 1.00 | 1.00 | 1.00 | 3  | 6.80  | 65.7 | 1.8060  | 2.4760  |
| 1.00 | 1.00 | 4.00 | 2.00 | 11 | 7.00  | 67.5 | -2.1920 | -1.9880 |
| 2.00 | 1.00 | 1.00 | 1.00 | 19 | 10.00 | 81.0 | -1.3750 | -0.7540 |
| 2.00 | 1.00 | 1.00 | 1.00 | 24 | 10.00 | 86.0 | -2.0830 | 0.1280  |
| 1.00 | 1.00 | 3.00 | 2.00 | 5  | 9.50  | 69.0 | 3.2090  | 1.8900  |
| 1.00 | 1.00 | 1.00 | 1.00 | 10 | 9.50  | 69.0 | -0.0400 | -1.7510 |
| 2.00 | 1.00 | 1.00 | 1.00 | 14 | 8.50  | 70.9 | -2.0240 | -2.6730 |
| 2.00 | 1.00 | 4.00 | 2.00 | 2  | 4.50  | 60.0 | -0.8050 | 0.7450  |
| 2.00 | 1.00 | 1.00 | 1.00 | 20 | 10.30 | 79.0 | -0.7440 | -1.2310 |
| 1.00 | 1.00 | 1.00 | 1.00 | 4  | 6.50  | 65.0 | 0.5350  | 1.1870  |
| 2.00 | 1.00 | 3.00 | 2.00 | 24 | 12.00 | 76.0 | -0.3040 | -3.0110 |
| 1.00 | 1.00 | 1.00 | 1.00 | 2  | 5.50  | 59.6 | 1.1640  | 1.1840  |
| 2.00 | 1.00 | 3.00 | 2.00 | 13 | 9.00  | 68.0 | -0.7380 | -2.6120 |
| 2.00 | 1.00 | 2.00 | 1.00 | 21 | 10.00 | 83.3 | -1.1350 | -0.1590 |
| 1.00 | 1.00 | 3.00 | 2.00 | 6  | 6.50  | 70.2 | -1.3790 | 0.8860  |
| 2.00 | 1.00 | 3.00 | 2.00 | 5  | 6.00  | 68.0 | -1.3110 | 0.7760  |
| 2.00 | 1.00 | 4.00 | 2.00 | 22 | 10.60 | 87.6 | -1.2630 | 0.4930  |
| 1.00 | 1.00 | 1.00 | 1.00 | 10 | 10.20 | 82.6 | 1.2690  | 3.9140  |
| 2.00 | 1.00 | 2.00 | 1.00 | 5  | 6.60  | 70.9 | -0.7050 | 1.8520  |
| 1.00 | 1.00 | 3.00 | 2.00 | 12 | 9.00  | 81.3 | -1.1340 | 1.9340  |
| 1.00 | 1.00 | 4.00 | 2.00 | 7  | 7.40  | 68.0 | -0.9710 | -0.5560 |
| 2.00 | 1.00 | 3.00 | 2.00 | 8  | 7.00  | 69.9 | -1.8480 | -0.4020 |
| 2.00 | 2.00 | 1.00 | 1.00 | 11 | 7.40  | 74.3 | -1.8010 | 0.4420  |
| 1.00 | 1.00 | 1.00 | 1.00 | 4  | 7.10  | 66.0 | 1.2480  | 1.5790  |
| 2.00 | 1.00 | 3.00 | 2.00 | 15 | 10.70 | 81.0 | 0.4200  | 1.0940  |
| 1.00 | 1.00 | 2.00 | 1.00 | 6  | 10.10 | 76.0 | 3.1450  | 3.8090  |
| 2.00 | 1.00 | 3.00 | 2.00 | 18 | 8.60  | 77.0 | -1.9020 | -1.2790 |
| 1.00 | 1.00 | 3.00 | 2.00 | 3  | 6.00  | 67.2 | 0.0190  | 2.3040  |
| 2.00 | 1.00 | 3.00 | 2.00 | 11 | 8.80  | 74.0 | -0.4330 | 0.3350  |
| 2.00 | 1.00 | 3.00 | 2.00 | 17 | 9.50  | 78.0 | -0.9870 | -0.6300 |
| 1.00 | 1.00 | 4.00 | 2.00 | 11 | 8.30  | 73.0 | -1.5680 | -0.7060 |
| 2.00 | 1.00 | 4.00 | 2.00 | 10 | 9.30  | 75.0 | -0.2440 | 0.5160  |
| 2.00 | 2.00 | 3.00 | 2.00 | 15 | 8.40  | 69.0 | -2.2670 | -3.6640 |
| 1.00 | 1.00 | 3.00 | 2.00 | 7  | 8.00  | 70.7 | 0.3080  | 1.1680  |
| 2.00 | 2.00 | 3.00 | 2.00 | 24 | 13.00 | 78.0 | 0.3930  | -2.3840 |
| 2.00 | 1.00 | 3.00 | 2.00 | 19 | 8.00  | 70.0 | -2.5410 | -3.8330 |
| 1.00 | 1.00 | 2.00 | 1.00 | 14 | 7.30  | 70.1 | -2.4890 | -2.2530 |
| 2.00 | 1.00 | 2.00 | 1.00 | 5  | 7.70  | 67.2 | 0.4250  | 0.4790  |
| 1.00 | 1.00 | 1.00 | 1.00 | 12 | 8.00  | 80.1 | -1.4600 | 2.0460  |
| 2.00 | 1.00 | 3.00 | 2.00 | 11 | 8.20  | 72.1 | -1.0190 | -0.3440 |
| 1.00 | 1.00 | 2.00 | 1.00 | 3  | 5.10  | 63.6 | -0.9280 | 0.9430  |
| 1.00 | 2.00 | 4.00 | 2.00 | 5  | 6.40  | 70.2 | -0.9070 | 1.5930  |

|      |      |      |      |    |       |      |         |         |
|------|------|------|------|----|-------|------|---------|---------|
| 2.00 | 1.00 | 4.00 | 2.00 | 23 | 9.00  | 81.3 | -2.6040 | -1.6600 |
| 1.00 | 1.00 | 2.00 | 1.00 | 8  | 8.00  | 74.2 | -0.1680 | 1.8990  |
| 2.00 | 2.00 | 1.00 | 1.00 | 5  | 5.90  | 69.0 | -1.4120 | 1.1470  |
| 1.00 | 1.00 | 3.00 | 2.00 | 3  | 6.70  | 65.6 | 0.8260  | 1.6990  |
| 2.00 | 1.00 | 3.00 | 2.00 | 17 | 8.70  | 69.6 | -2.2420 | -3.9880 |
| 1.00 | 1.00 | 2.00 | 1.00 | 6  | 6.00  | 64.1 | -1.3880 | -0.6940 |
| 2.00 | 1.00 | 3.00 | 2.00 | 12 | 8.30  | 73.0 | -1.1740 | -0.4590 |
| 1.00 | 1.00 | 1.00 | 1.00 | 4  | 8.30  | 72.5 | 1.7630  | 3.2830  |
| 2.00 | 1.00 | 3.00 | 2.00 | 10 | 7.50  | 66.2 | -2.0810 | -2.8090 |
| 1.00 | 1.00 | 2.00 | 1.00 | 12 | 8.20  | 78.9 | -1.2700 | 1.6230  |
| 2.00 | 1.00 | 1.00 | 1.00 | 9  | 7.80  | 71.3 | -1.4250 | -0.3910 |
| 1.00 | 1.00 | 3.00 | 2.00 | 3  | 7.80  | 71.2 | 2.0930  | 3.8170  |
| 2.00 | 1.00 | 3.00 | 2.00 | 19 | 9.60  | 85.5 | -1.7060 | 0.6960  |
| 2.00 | 1.00 | 3.00 | 2.00 | 8  | 8.40  | 73.0 | 0.2500  | 1.4560  |
| 2.00 | 1.00 | 2.00 | 1.00 | 24 | 14.00 | 90.3 | 1.5690  | 1.7950  |
| 1.00 | 1.00 | 2.00 | 1.00 | 4  | 6.90  | 66.3 | 1.0110  | 1.6970  |
| 1.00 | 1.00 | 4.00 | 2.00 | 4  | 5.50  | 60.0 | -0.6910 | -0.7740 |
| 1.00 | 1.00 | 3.00 | 2.00 | 4  | 6.80  | 68.0 | 0.8920  | 2.3630  |
| 2.00 | 1.00 | 1.00 | 1.00 | 16 | 9.00  | 81.2 | -1.8570 | 0.2590  |
| 1.00 | 1.00 | 1.00 | 1.00 | 3  | 5.30  | 55.9 | -0.1330 | -1.4690 |
| 2.00 | 1.00 | 1.00 | 1.00 | 20 | 11.40 | 76.8 | -0.3630 | -2.3510 |
| 2.00 | 1.00 | 1.00 | 1.00 | 24 | 9.30  | 70.3 | -2.1270 | -4.4280 |
| 1.00 | 1.00 | 3.00 | 2.00 | 3  | 5.20  | 63.4 | -0.8230 | 0.8680  |
| 2.00 | 1.00 | 2.00 | 1.00 | 23 | 12.10 | 88.5 | 0.2970  | 0.8910  |
| 2.00 | 1.00 | 2.00 | 1.00 | 23 | 10.00 | 85.1 | -1.4090 | -0.1550 |
| 1.00 | 1.00 | 3.00 | 2.00 | 5  | 6.40  | 65.4 | -0.3040 | 0.5060  |
| 2.00 | 1.00 | 1.00 | 1.00 | 5  | 6.10  | 66.1 | -0.6630 | 0.7750  |
| 2.00 | 1.00 | 4.00 | 2.00 | 11 | 9.70  | 77.6 | 0.4460  | 1.6220  |
| 1.00 | 1.00 | 2.00 | 1.00 | 4  | 6.10  | 60.8 | -0.5870 | -1.0790 |
| 2.00 | 1.00 | 1.00 | 1.00 | 19 | 9.50  | 74.2 | -1.7890 | -2.9460 |
| 1.00 | 1.00 | 2.00 | 1.00 | 7  | 9.00  | 70.0 | 1.3640  | 0.9060  |
| 1.00 | 1.00 | 2.00 | 1.00 | 3  | 6.00  | 61.2 | 0.7750  | 0.6650  |
| 2.00 | 1.00 | 2.00 | 1.00 | 2  | 4.80  | 59.2 | 0.1340  | 1.0180  |
| 1.00 | 1.00 | 3.00 | 2.00 | 5  | 7.80  | 73.0 | 0.5300  | 2.6320  |
| 2.00 | 2.00 | 3.00 | 2.00 | 19 | 10.10 | 76.1 | -1.2920 | -2.3330 |
| 1.00 | 1.00 | 1.00 | 1.00 | 6  | 6.80  | 68.6 | -1.0720 | 0.2910  |
| 1.00 | 1.00 | 1.00 | 1.00 | 2  | 6.00  | 61.5 | 1.0260  | 1.3280  |
| 2.00 | 1.00 | 3.00 | 2.00 | 17 | 9.40  | 80.0 | -1.6330 | -0.4860 |
| 1.00 | 1.00 | 3.00 | 2.00 | 8  | 6.90  | 69.6 | -1.3440 | 0.1990  |
| 2.00 | 2.00 | 2.00 | 1.00 | 16 | 8.00  | 78.0 | -2.1530 | -0.2870 |
| 1.00 | 1.00 | 2.00 | 1.00 | 6  | 7.20  | 72.0 | -0.6620 | 1.5560  |
| 2.00 | 1.00 | 3.00 | 2.00 | 10 | 10.00 | 75.3 | 1.0710  | 1.2740  |
| 1.00 | 1.00 | 2.00 | 1.00 | 3  | 7.90  | 58.8 | 2.2080  | -0.8720 |
| 1.00 | 1.00 | 2.00 | 1.00 | 11 | 7.50  | 72.1 | -1.7040 | -0.3440 |
| 2.00 | 1.00 | 1.00 | 1.00 | 7  | 7.00  | 70.4 | -0.7840 | 1.0560  |
| 1.00 | 1.00 | 3.00 | 2.00 | 8  | 6.40  | 65.0 | -1.8780 | -1.5030 |
| 1.00 | 1.00 | 3.00 | 2.00 | 6  | 5.40  | 65.5 | -2.5070 | -0.8630 |

|      |      |      |      |    |       |      |         |         |
|------|------|------|------|----|-------|------|---------|---------|
| 2.00 | 1.00 | 3.00 | 2.00 | 22 | 11.60 | 76.0 | 0.0420  | -2.7110 |
| 1.00 | 1.00 | 3.00 | 2.00 | 6  | 7.40  | 72.2 | -0.4570 | 1.6300  |
| 2.00 | 1.00 | 3.00 | 2.00 | 19 | 10.30 | 83.0 | -1.1260 | -0.1100 |
| 2.00 | 1.00 | 1.00 | 1.00 | 4  | 6.00  | 65.0 | -0.0620 | 1.1870  |
| 1.00 | 1.00 | 3.00 | 2.00 | 2  | 5.20  | 56.0 | 0.0110  | -0.8110 |
| 1.00 | 1.00 | 3.00 | 2.00 | 8  | 8.40  | 79.0 | -0.3960 | 3.0270  |
| 1.00 | 1.00 | 3.00 | 2.00 | 5  | 7.00  | 68.0 | -0.3000 | 0.7760  |
| 1.00 | 2.00 | 1.00 | 1.00 | 7  | 8.70  | 70.5 | 0.3640  | 0.3810  |
| 1.00 | 1.00 | 2.00 | 1.00 | 9  | 9.00  | 68.8 | -0.1870 | -1.3370 |
| 2.00 | 2.00 | 3.00 | 2.00 | 14 | 8.70  | 75.4 | -1.8360 | -1.0580 |
| 1.00 | 2.00 | 3.00 | 2.00 | 5  | 8.00  | 75.0 | 0.7410  | 3.3740  |
| 2.00 | 2.00 | 2.00 | 1.00 | 2  | 4.60  | 55.0 | -0.1600 | -0.7320 |
| 2.00 | 2.00 | 2.00 | 1.00 | 20 | 10.90 | 87.4 | -0.7680 | 0.9960  |
| 1.00 | 1.00 | 3.00 | 2.00 | 10 | 10.00 | 79.0 | 0.4340  | 2.0260  |
| 2.00 | 1.00 | 4.00 | 2.00 | 17 | 9.30  | 77.0 | -1.1600 | -0.9600 |
| 1.00 | 1.00 | 2.00 | 1.00 | 9  | 9.00  | 68.0 | 0.4440  | -0.8960 |
| 2.00 | 1.00 | 3.00 | 2.00 | 24 | 8.90  | 81.0 | -2.4680 | -1.0880 |
| 1.00 | 1.00 | 3.00 | 2.00 | 9  | 9.60  | 75.0 | 0.4030  | 1.0090  |
| 2.00 | 1.00 | 2.00 | 1.00 | 17 | 8.30  | 77.0 | -2.5900 | -1.4960 |
| 1.00 | 1.00 | 3.00 | 2.00 | 7  | 9.00  | 74.0 | 0.6660  | 1.6910  |
| 2.00 | 2.00 | 3.00 | 2.00 | 16 | 8.90  | 80.0 | -1.3620 | 0.3820  |
| 1.00 | 1.00 | 3.00 | 2.00 | 4  | 7.80  | 57.7 | 2.0800  | -1.6760 |
| 1.00 | 1.00 | 4.00 | 2.00 | 7  | 6.40  | 69.0 | -1.4480 | 0.5330  |
| 2.00 | 1.00 | 1.00 | 1.00 | 23 | 9.10  | 80.5 | -2.5270 | -1.9000 |
| 2.00 | 1.00 | 4.00 | 2.00 | 24 | 10.00 | 85.0 | -2.0830 | -0.1860 |
| 1.00 | 1.00 | 1.00 | 1.00 | 9  | 7.20  | 69.0 | -2.0440 | -1.2610 |
| 2.00 | 1.00 | 3.00 | 2.00 | 11 | 14.50 | 79.5 | 4.2710  | 1.7310  |
| 1.00 | 1.00 | 1.00 | 1.00 | 8  | 8.50  | 60.0 | -0.2930 | -4.1360 |
| 2.00 | 1.00 | 1.00 | 1.00 | 6  | 7.60  | 69.0 | 0.4260  | 1.1610  |
| 1.00 | 1.00 | 2.00 | 1.00 | 7  | 7.90  | 69.7 | 0.2020  | 0.7940  |
| 2.00 | 1.00 | 3.00 | 2.00 | 19 | 10.20 | 78.2 | -1.2090 | -1.6560 |
| 1.00 | 1.00 | 1.00 | 1.00 | 4  | 6.00  | 65.0 | -0.0620 | 1.1870  |
| 2.00 | 1.00 | 3.00 | 2.00 | 13 | 8.40  | 74.2 | -1.2970 | -0.4520 |
| 2.00 | 1.00 | 1.00 | 1.00 | 23 | 10.50 | 81.8 | -1.0010 | -1.1720 |
| 1.00 | 1.00 | 1.00 | 1.00 | 7  | 8.00  | 76.5 | -0.3500 | 2.6270  |
| 1.00 | 1.00 | 2.00 | 1.00 | 2  | 5.00  | 57.2 | -0.2230 | -0.3440 |
| 1.00 | 1.00 | 1.00 | 1.00 | 3  | 8.80  | 68.5 | 4.3850  | 3.6040  |
| 2.00 | 1.00 | 2.00 | 1.00 | 17 | 8.60  | 79.3 | -2.3290 | -0.7220 |
| 1.00 | 1.00 | 2.00 | 1.00 | 9  | 6.20  | 67.3 | -2.4430 | -1.1520 |
| 2.00 | 1.00 | 3.00 | 2.00 | 9  | 8.40  | 72.3 | -0.1650 | 0.6770  |
| 1.00 | 1.00 | 3.00 | 2.00 | 6  | 7.50  | 63.2 | -0.3540 | -1.7200 |
| 2.00 | 1.00 | 1.00 | 1.00 | 13 | 9.60  | 77.2 | -0.7830 | -0.0140 |
| 1.00 | 1.00 | 1.00 | 1.00 | 8  | 8.90  | 78.5 | 0.1160  | 2.8380  |
| 1.00 | 1.00 | 3.00 | 2.00 | 6  | 7.00  | 64.3 | -0.8670 | -1.3100 |
| 2.00 | 1.00 | 3.00 | 2.00 | 23 | 11.20 | 83.5 | -0.9240 | -0.9990 |
| 2.00 | 1.00 | 2.00 | 1.00 | 9  | 8.50  | 80.5 | -0.7030 | 3.0890  |
| 1.00 | 1.00 | 2.00 | 1.00 | 7  | 8.50  | 60.1 | 0.8360  | -2.7950 |

|      |      |      |      |    |       |      |         |         |
|------|------|------|------|----|-------|------|---------|---------|
| 2.00 | 1.00 | 3.00 | 2.00 | 23 | 9.00  | 75.6 | -2.2250 | -3.0810 |
| 1.00 | 1.00 | 3.00 | 2.00 | 6  | 7.90  | 66.6 | 0.0560  | -0.4540 |
| 1.00 | 1.00 | 1.00 | 1.00 | 11 | 10.60 | 76.8 | 0.6810  | 0.7190  |
| 1.00 | 1.00 | 3.00 | 2.00 | 9  | 8.60  | 71.2 | 0.0410  | 0.2750  |
| 2.00 | 1.00 | 2.00 | 1.00 | 9  | 7.50  | 71.0 | -1.7340 | -0.5040 |
| 2.00 | 1.00 | 1.00 | 1.00 | 8  | 7.50  | 69.1 | -0.7030 | 0.0140  |
| 1.00 | 1.00 | 3.00 | 2.00 | 11 | 7.90  | 74.4 | -1.3130 | 0.4780  |
| 2.00 | 1.00 | 1.00 | 1.00 | 8  | 8.40  | 72.8 | -0.3960 | 0.6910  |
| 2.00 | 1.00 | 3.00 | 2.00 | 5  | 7.60  | 66.9 | 0.3190  | 0.3680  |
| 1.00 | 1.00 | 4.00 | 2.00 | 8  | 6.30  | 70.4 | -1.9850 | 0.4950  |
| 2.00 | 1.00 | 3.00 | 2.00 | 15 | 8.30  | 70.0 | -1.7420 | -2.6360 |
| 1.00 | 1.00 | 2.00 | 1.00 | 8  | 7.01  | 67.8 | -1.2260 | -0.4670 |
| 2.00 | 1.00 | 1.00 | 1.00 | 12 | 7.40  | 72.1 | -2.7110 | -1.4780 |
| 1.00 | 1.00 | 1.00 | 1.00 | 8  | 7.80  | 79.8 | -0.3820 | 3.9690  |
| 2.00 | 1.00 | 3.00 | 2.00 | 10 | 8.50  | 67.0 | -0.4220 | -1.7290 |
| 2.00 | 1.00 | 2.00 | 1.00 | 11 | 10.60 | 76.8 | 0.6810  | 0.7190  |
| 1.00 | 1.00 | 3.00 | 2.00 | 6  | 10.40 | 68.0 | 3.4710  | 0.7820  |
| 2.00 | 1.00 | 3.00 | 2.00 | 4  | 5.00  | 60.0 | -1.7000 | -1.3780 |
| 1.00 | 1.00 | 4.00 | 2.00 | 5  | 6.00  | 67.5 | -1.3110 | 0.5900  |
| 2.00 | 1.00 | 3.00 | 2.00 | 24 | 12.70 | 89.1 | 0.6430  | 1.4240  |
| 2.00 | 1.00 | 2.00 | 1.00 | 24 | 10.50 | 80.6 | -1.6380 | -1.5670 |
| 1.00 | 1.00 | 3.00 | 2.00 | 7  | 8.00  | 76.6 | -0.3500 | 2.6640  |
| 2.00 | 1.00 | 3.00 | 2.00 | 24 | 12.50 | 88.3 | 0.5010  | 1.1770  |
| 1.00 | 1.00 | 2.00 | 1.00 | 3  | 5.00  | 60.0 | -1.0330 | -0.4180 |
| 2.00 | 2.00 | 3.00 | 2.00 | 7  | 8.70  | 73.8 | 0.3640  | 1.6160  |
| 1.00 | 2.00 | 3.00 | 2.00 | 6  | 6.80  | 68.1 | -0.4690 | 0.8200  |
| 1.00 | 2.00 | 2.00 | 1.00 | 4  | 5.40  | 63.0 | -0.8160 | 0.4030  |
| 2.00 | 1.00 | 1.00 | 1.00 | 3  | 5.60  | 62.0 | -0.4020 | 0.3380  |
| 1.00 | 2.00 | 3.00 | 2.00 | 8  | 7.80  | 67.1 | -0.3820 | -0.7260 |
| 2.00 | 1.00 | 3.00 | 2.00 | 24 | 10.20 | 80.5 | -1.9050 | -1.5990 |
| 1.00 | 2.00 | 1.00 | 1.00 | 9  | 8.70  | 72.7 | 0.1420  | 0.8240  |
| 2.00 | 1.00 | 2.00 | 1.00 | 2  | 4.80  | 60.4 | 0.1340  | 1.5180  |
| 1.00 | 1.00 | 2.00 | 1.00 | 4  | 5.40  | 65.0 | -1.2960 | 0.4870  |
| 1.00 | 2.00 | 2.00 | 1.00 | 4  | 9.00  | 65.0 | 3.5060  | 1.1870  |
| 2.00 | 1.00 | 2.00 | 1.00 | 20 | 8.80  | 82.3 | -2.4710 | -0.6140 |
| 1.00 | 1.00 | 2.00 | 1.00 | 4  | 5.70  | 67.1 | -0.4390 | 2.0100  |
| 2.00 | 1.00 | 2.00 | 1.00 | 2  | 6.10  | 60.2 | 1.1530  | 0.8230  |
| 2.00 | 2.00 | 2.00 | 1.00 | 7  | 7.80  | 73.0 | 0.0970  | 2.0270  |
| 1.00 | 1.00 | 2.00 | 1.00 | 6  | 8.00  | 70.0 | 0.8610  | 1.5390  |
| 1.00 | 1.00 | 3.00 | 2.00 | 12 | 8.50  | 77.2 | -1.6270 | 0.4140  |
| 2.00 | 1.00 | 1.00 | 1.00 | 14 | 10.60 | 78.5 | -0.0490 | 0.0550  |
| 1.00 | 1.00 | 2.00 | 1.00 | 7  | 5.60  | 62.5 | -2.8340 | -2.6160 |
| 1.00 | 2.00 | 1.00 | 1.00 | 10 | 10.00 | 72.6 | 0.4340  | -0.3900 |
| 2.00 | 1.00 | 3.00 | 2.00 | 24 | 12.30 | 87.0 | -0.0380 | 0.4420  |
| 1.00 | 1.00 | 1.00 | 1.00 | 13 | 8.20  | 71.0 | -1.4840 | -1.5670 |
| 2.00 | 2.00 | 1.00 | 1.00 | 3  | 6.80  | 69.0 | 1.8060  | 3.8050  |
| 2.00 | 1.00 | 1.00 | 1.00 | 5  | 7.00  | 65.9 | -0.3000 | -0.0030 |

|      |      |      |      |    |       |      |         |         |
|------|------|------|------|----|-------|------|---------|---------|
| 1.00 | 1.00 | 1.00 | 1.00 | 5  | 6.90  | 63.8 | 0.2770  | -0.1090 |
| 1.00 | 1.00 | 2.00 | 1.00 | 5  | 6.90  | 66.8 | -0.4010 | 0.3310  |
| 1.00 | 1.00 | 1.00 | 1.00 | 6  | 6.80  | 67.2 | -0.4690 | 0.4800  |
| 2.00 | 1.00 | 3.00 | 2.00 | 20 | 8.40  | 80.5 | -2.7950 | -1.1830 |
| 1.00 | 1.00 | 1.00 | 1.00 | 5  | 6.80  | 65.0 | 0.1650  | 0.3520  |
| 2.00 | 1.00 | 1.00 | 1.00 | 4  | 7.11  | 63.8 | 1.2600  | 0.7170  |
| 2.00 | 1.00 | 2.00 | 1.00 | 9  | 9.10  | 73.2 | 0.5450  | 1.0060  |
| 1.00 | 1.00 | 1.00 | 1.00 | 10 | 7.60  | 73.6 | -1.9790 | -0.0120 |
| 2.00 | 1.00 | 3.00 | 2.00 | 12 | 7.50  | 72.7 | -1.9370 | -0.5650 |
| 1.00 | 2.00 | 3.00 | 2.00 | 12 | 9.50  | 77.6 | -0.0300 | 1.1640  |
| 2.00 | 2.00 | 2.00 | 1.00 | 15 | 8.80  | 77.5 | -1.9000 | -0.6740 |
| 1.00 | 1.00 | 3.00 | 2.00 | 10 | 9.40  | 73.0 | 0.4760  | 0.4420  |
| 2.00 | 2.00 | 2.00 | 1.00 | 3  | 5.00  | 62.0 | -0.5360 | 0.9870  |
| 1.00 | 1.00 | 1.00 | 1.00 | 9  | 9.00  | 77.4 | -0.1870 | 1.9170  |
| 1.00 | 1.00 | 2.00 | 1.00 | 13 | 9.20  | 78.6 | -1.1690 | 0.4980  |
| 2.00 | 1.00 | 2.00 | 1.00 | 2  | 6.20  | 64.0 | 1.2790  | 2.3000  |
| 1.00 | 1.00 | 1.00 | 1.00 | 9  | 10.60 | 72.0 | 2.0590  | 0.5670  |
| 2.00 | 1.00 | 2.00 | 1.00 | 21 | 8.90  | 81.9 | -2.4890 | -1.0000 |
| 1.00 | 1.00 | 3.00 | 2.00 | 11 | 7.70  | 73.6 | -1.5080 | 0.1920  |
| 2.00 | 1.00 | 4.00 | 2.00 | 13 | 10.50 | 79.5 | 0.6710  | 1.3940  |
| 1.00 | 1.00 | 4.00 | 2.00 | 6  | 8.20  | 70.0 | 1.0780  | 1.5390  |
| 1.00 | 1.00 | 3.00 | 2.00 | 7  | 10.10 | 68.3 | 2.5260  | 0.2710  |
| 1.00 | 1.00 | 4.00 | 2.00 | 15 | 7.90  | 78.4 | -2.7250 | -0.3580 |
| 2.00 | 1.00 | 3.00 | 2.00 | 8  | 6.70  | 67.8 | -2.1590 | -1.1940 |
| 1.00 | 1.00 | 2.00 | 1.00 | 8  | 7.51  | 71.6 | -0.6920 | 0.9380  |
| 1.00 | 1.00 | 2.00 | 1.00 | 11 | 7.50  | 71.1 | -1.7040 | -0.7010 |
| 2.00 | 1.00 | 1.00 | 1.00 | 8  | 7.90  | 70.7 | -0.9150 | -0.1000 |
| 1.00 | 1.00 | 2.00 | 1.00 | 11 | 7.90  | 69.2 | -1.9700 | -2.1320 |
| 2.00 | 1.00 | 3.00 | 2.00 | 4  | 6.70  | 61.5 | 0.0210  | -0.8180 |
| 1.00 | 1.00 | 3.00 | 2.00 | 6  | 7.70  | 68.2 | 0.5350  | 0.8580  |
| 2.00 | 1.00 | 4.00 | 2.00 | 22 | 10.60 | 87.6 | -1.2630 | 0.4930  |
| 1.00 | 1.00 | 3.00 | 2.00 | 14 | 7.30  | 70.1 | -2.4890 | -2.2530 |
| 2.00 | 1.00 | 3.00 | 2.00 | 5  | 5.10  | 61.0 | -2.2210 | -1.8240 |
| 1.00 | 1.00 | 2.00 | 1.00 | 24 | 9.30  | 77.2 | -2.1270 | -2.2740 |
| 1.00 | 1.00 | 1.00 | 1.00 | 7  | 8.90  | 76.9 | 1.2590  | 3.4850  |
| 1.00 | 1.00 | 3.00 | 2.00 | 5  | 7.00  | 72.7 | -0.3000 | 2.5200  |
| 2.00 | 1.00 | 3.00 | 2.00 | 24 | 11.00 | 83.7 | -0.6780 | -0.2460 |
| 1.00 | 1.00 | 2.00 | 1.00 | 9  | 10.40 | 70.1 | 1.1730  | -0.8450 |
| 1.00 | 1.00 | 1.00 | 1.00 | 3  | 6.50  | 65.0 | 1.4200  | 2.1950  |
| 2.00 | 1.00 | 3.00 | 2.00 | 24 | 11.10 | 85.3 | -1.1050 | -0.0920 |
| 2.00 | 2.00 | 1.00 | 1.00 | 24 | 10.00 | 86.0 | -1.5300 | 0.4670  |
| 1.00 | 2.00 | 1.00 | 1.00 | 5  | 8.50  | 66.1 | 1.2670  | 0.0710  |
| 2.00 | 1.00 | 3.00 | 2.00 | 6  | 7.70  | 68.2 | 0.5350  | 0.8580  |
| 2.00 | 1.00 | 2.00 | 1.00 | 6  | 8.00  | 68.4 | 0.1590  | 0.2160  |
| 1.00 | 1.00 | 3.00 | 2.00 | 9  | 7.90  | 70.0 | -0.6830 | -0.1640 |
| 2.00 | 1.00 | 3.00 | 2.00 | 13 | 8.60  | 81.3 | -1.7470 | 1.4840  |
| 2.00 | 1.00 | 3.00 | 2.00 | 24 | 9.70  | 80.7 | -1.7860 | -1.1820 |

|      |      |      |      |    |       |      |         |         |
|------|------|------|------|----|-------|------|---------|---------|
| 1.00 | 1.00 | 3.00 | 2.00 | 3  | 6.30  | 62.2 | 1.1620  | 1.0670  |
| 2.00 | 1.00 | 2.00 | 1.00 | 5  | 8.30  | 67.0 | 1.0560  | 0.4050  |
| 1.00 | 1.00 | 3.00 | 2.00 | 3  | 5.10  | 59.5 | -0.9280 | -0.6070 |
| 2.00 | 2.00 | 3.00 | 2.00 | 6  | 6.00  | 66.4 | -1.3880 | 0.1770  |
| 2.00 | 2.00 | 3.00 | 2.00 | 14 | 8.30  | 83.7 | -2.2120 | 1.9200  |
| 1.00 | 1.00 | 3.00 | 2.00 | 9  | 8.60  | 74.5 | 0.0410  | 1.4820  |
| 1.00 | 1.00 | 2.00 | 1.00 | 6  | 9.20  | 73.0 | 1.3940  | 1.9280  |
| 2.00 | 1.00 | 1.00 | 1.00 | 5  | 6.90  | 65.0 | -0.4010 | -0.3380 |
| 2.00 | 1.00 | 3.00 | 2.00 | 12 | 8.50  | 74.0 | -0.9840 | -0.1060 |
| 2.00 | 1.00 | 1.00 | 1.00 | 3  | 7.00  | 56.0 | 1.1710  | -1.9320 |
| 1.00 | 1.00 | 1.00 | 1.00 | 11 | 8.80  | 70.0 | -0.4330 | -1.0940 |
| 2.00 | 1.00 | 2.00 | 1.00 | 18 | 8.50  | 79.7 | -1.9870 | -0.3990 |
| 1.00 | 1.00 | 1.00 | 1.00 | 7  | 8.70  | 72.0 | 1.0470  | 1.6540  |
| 2.00 | 1.00 | 1.00 | 1.00 | 20 | 8.60  | 84.0 | -2.1650 | 0.3590  |
| 1.00 | 1.00 | 1.00 | 1.00 | 12 | 7.90  | 70.0 | -2.2180 | -2.2570 |
| 2.00 | 1.00 | 3.00 | 2.00 | 23 | 13.90 | 89.0 | 1.1640  | 0.6540  |
| 2.00 | 2.00 | 3.00 | 2.00 | 11 | 8.80  | 74.0 | -1.0660 | -0.3310 |
| 1.00 | 1.00 | 2.00 | 1.00 | 3  | 8.20  | 64.0 | 3.6110  | 1.7920  |
| 2.00 | 1.00 | 3.00 | 2.00 | 2  | 7.00  | 59.4 | 2.2940  | 0.5120  |
| 2.00 | 1.00 | 1.00 | 1.00 | 11 | 8.70  | 70.0 | -0.5300 | -1.0940 |
| 1.00 | 1.00 | 2.00 | 1.00 | 10 | 9.60  | 76.5 | 0.0580  | 1.0820  |
| 2.00 | 1.00 | 3.00 | 2.00 | 13 | 8.60  | 77.0 | -1.7470 | -0.0870 |
| 2.00 | 2.00 | 2.00 | 1.00 | 8  | 7.40  | 73.3 | -1.4330 | 0.8790  |
| 1.00 | 1.00 | 3.00 | 2.00 | 4  | 5.40  | 64.3 | -1.2960 | 0.2260  |
| 1.00 | 1.00 | 1.00 | 1.00 | 2  | 5.70  | 60.1 | 0.6450  | 0.7840  |
| 2.00 | 1.00 | 2.00 | 1.00 | 5  | 7.00  | 64.1 | 0.3900  | 0.0070  |
| 1.00 | 1.00 | 1.00 | 1.00 | 11 | 8.80  | 74.1 | -1.0660 | -0.2940 |
| 2.00 | 1.00 | 2.00 | 1.00 | 11 | 7.70  | 72.8 | -1.5080 | -0.0940 |
| 2.00 | 2.00 | 4.00 | 2.00 | 5  | 6.20  | 68.0 | -1.1090 | 0.7760  |
| 2.00 | 1.00 | 1.00 | 1.00 | 23 | 9.50  | 81.1 | -1.8170 | -1.3870 |
| 1.00 | 1.00 | 3.00 | 2.00 | 2  | 5.50  | 57.0 | 1.1640  | 0.1010  |
| 1.00 | 2.00 | 3.00 | 2.00 | 5  | 7.50  | 72.0 | 0.9540  | 3.0420  |
| 2.00 | 2.00 | 3.00 | 2.00 | 10 | 7.20  | 68.3 | -1.7280 | -1.2580 |
| 2.00 | 1.00 | 3.00 | 2.00 | 16 | 9.50  | 79.1 | -0.8340 | 0.0810  |
| 1.00 | 1.00 | 3.00 | 2.00 | 8  | 6.50  | 64.6 | -2.3660 | -2.4010 |
| 2.00 | 1.00 | 2.00 | 1.00 | 9  | 10.20 | 72.4 | 0.9810  | 0.0260  |
| 1.00 | 1.00 | 1.00 | 1.00 | 13 | 9.60  | 79.1 | -0.7830 | 0.6800  |
| 1.00 | 1.00 | 2.00 | 1.00 | 11 | 10.80 | 80.1 | 0.8650  | 1.9560  |
| 1.00 | 1.00 | 3.00 | 2.00 | 6  | 7.70  | 65.9 | -0.1490 | -0.7140 |
| 2.00 | 1.00 | 2.00 | 1.00 | 18 | 11.10 | 79.0 | 0.2430  | -0.6270 |
| 2.00 | 1.00 | 3.00 | 2.00 | 11 | 8.10  | 71.0 | -1.1170 | -0.7370 |
| 1.00 | 1.00 | 3.00 | 2.00 | 6  | 6.10  | 65.0 | -1.7890 | -1.0500 |
| 2.00 | 1.00 | 2.00 | 1.00 | 11 | 7.90  | 70.0 | -1.9700 | -1.8320 |
| 1.00 | 1.00 | 3.00 | 2.00 | 11 | 9.40  | 73.5 | -0.4630 | -0.5190 |
| 2.00 | 2.00 | 2.00 | 1.00 | 8  | 7.20  | 71.0 | -1.0230 | 0.7160  |
| 1.00 | 1.00 | 3.00 | 2.00 | 4  | 6.80  | 60.0 | 0.1300  | -1.3780 |
| 1.00 | 1.00 | 3.00 | 2.00 | 8  | 8.80  | 77.0 | 0.6620  | 2.9340  |

|      |      |      |      |    |       |      |         |         |
|------|------|------|------|----|-------|------|---------|---------|
| 2.00 | 2.00 | 2.00 | 1.00 | 16 | 9.10  | 76.0 | -1.7680 | -1.5310 |
| 1.00 | 1.00 | 2.00 | 1.00 | 5  | 8.90  | 67.0 | 2.5320  | 1.1210  |
| 2.00 | 1.00 | 3.00 | 2.00 | 6  | 8.20  | 65.4 | 1.0780  | -0.2020 |
| 2.00 | 1.00 | 1.00 | 1.00 | 6  | 6.20  | 66.0 | -1.1580 | 0.0260  |
| 1.00 | 1.00 | 1.00 | 1.00 | 13 | 8.40  | 75.0 | -1.2970 | -0.1740 |
| 2.00 | 1.00 | 2.00 | 1.00 | 19 | 10.60 | 80.0 | -0.8770 | -1.0760 |
| 2.00 | 2.00 | 2.00 | 1.00 | 13 | 8.60  | 74.9 | -1.7470 | -0.8540 |
| 1.00 | 1.00 | 3.00 | 2.00 | 3  | 7.50  | 64.0 | 1.7470  | 1.0940  |
| 2.00 | 1.00 | 3.00 | 2.00 | 16 | 9.00  | 76.5 | -1.2740 | -0.7890 |
| 1.00 | 2.00 | 1.00 | 1.00 | 8  | 7.60  | 68.2 | -1.2260 | -1.0430 |
| 1.00 | 1.00 | 2.00 | 1.00 | 7  | 9.40  | 78.0 | 1.0680  | 3.1880  |
| 2.00 | 1.00 | 2.00 | 1.00 | 5  | 7.90  | 68.0 | 1.4050  | 1.5050  |
| 1.00 | 1.00 | 2.00 | 1.00 | 10 | 7.00  | 72.0 | -1.9290 | 0.0800  |
| 1.00 | 1.00 | 2.00 | 1.00 | 7  | 9.00  | 73.0 | 1.3640  | 2.0270  |
| 1.00 | 1.00 | 3.00 | 2.00 | 13 | 8.90  | 75.1 | -0.8320 | -0.1390 |
| 2.00 | 1.00 | 2.00 | 1.00 | 17 | 9.70  | 80.0 | -1.3720 | -0.4860 |
| 2.00 | 2.00 | 3.00 | 2.00 | 5  | 7.10  | 68.0 | -0.1990 | 0.7760  |
| 1.00 | 1.00 | 2.00 | 1.00 | 3  | 5.50  | 56.0 | -0.5080 | -1.9320 |
| 2.00 | 1.00 | 2.00 | 1.00 | 9  | 8.30  | 70.9 | -0.9090 | -0.5420 |
| 2.00 | 1.00 | 3.00 | 2.00 | 18 | 7.50  | 74.2 | -2.8420 | -2.1910 |
| 1.00 | 2.00 | 2.00 | 1.00 | 11 | 10.80 | 80.0 | 0.8650  | 1.9190  |
| 2.00 | 2.00 | 2.00 | 1.00 | 24 | 10.40 | 86.0 | -1.7270 | 0.1280  |
| 2.00 | 1.00 | 2.00 | 1.00 | 24 | 9.60  | 76.0 | -2.4380 | -3.0110 |
| 1.00 | 1.00 | 2.00 | 1.00 | 2  | 4.20  | 57.0 | -1.1550 | -0.4220 |
| 1.00 | 1.00 | 2.00 | 1.00 | 9  | 8.90  | 71.5 | -0.2900 | -0.3150 |
| 2.00 | 1.00 | 3.00 | 2.00 | 8  | 8.90  | 70.0 | 0.7650  | 0.3470  |
| 2.00 | 1.00 | 2.00 | 1.00 | 2  | 5.50  | 60.3 | 0.3920  | 0.8620  |
| 1.00 | 1.00 | 4.00 | 2.00 | 4  | 4.10  | 58.0 | -2.4510 | -1.5590 |
| 2.00 | 1.00 | 2.00 | 1.00 | 2  | 5.00  | 62.0 | -0.2230 | 1.5230  |
| 1.00 | 1.00 | 2.00 | 1.00 | 4  | 7.50  | 68.0 | 1.7240  | 2.3630  |
| 1.00 | 1.00 | 1.00 | 1.00 | 12 | 9.50  | 78.1 | -0.0300 | 1.3410  |
| 1.00 | 2.00 | 2.00 | 1.00 | 7  | 11.50 | 70.0 | 3.1830  | 0.1940  |
| 2.00 | 1.00 | 2.00 | 1.00 | 17 | 6.50  | 65.2 | -3.5860 | -4.8550 |
| 2.00 | 1.00 | 2.00 | 1.00 | 4  | 5.60  | 60.0 | -0.5650 | -0.7740 |
| 2.00 | 1.00 | 2.00 | 1.00 | 5  | 7.00  | 69.2 | 0.3900  | 1.9660  |
| 1.00 | 2.00 | 3.00 | 2.00 | 14 | 9.50  | 79.0 | -0.4830 | 0.8060  |
| 1.00 | 2.00 | 2.00 | 1.00 | 5  | 7.70  | 67.0 | 0.4250  | 0.4050  |
| 1.00 | 2.00 | 2.00 | 1.00 | 5  | 6.00  | 69.0 | -1.3110 | 1.1470  |
| 1.00 | 2.00 | 3.00 | 2.00 | 4  | 6.80  | 66.0 | 0.1300  | 0.8600  |
| 1.00 | 1.00 | 3.00 | 2.00 | 4  | 6.00  | 64.0 | -0.0620 | 0.7950  |
| 2.00 | 1.00 | 4.00 | 2.00 | 23 | 12.30 | 86.2 | -0.0840 | -0.1870 |
| 1.00 | 2.00 | 2.00 | 1.00 | 8  | 7.30  | 68.2 | -0.9170 | -0.3190 |
| 2.00 | 2.00 | 2.00 | 1.00 | 11 | 9.20  | 76.0 | -0.6640 | 0.4190  |
| 2.00 | 2.00 | 1.00 | 1.00 | 9  | 8.70  | 72.7 | 0.1420  | 0.8240  |
| 1.00 | 1.00 | 1.00 | 1.00 | 3  | 5.50  | 60.4 | -0.5080 | -0.2670 |
| 1.00 | 1.00 | 4.00 | 2.00 | 9  | 10.70 | 77.7 | 2.1600  | 2.6530  |
| 1.00 | 2.00 | 3.00 | 2.00 | 8  | 8.00  | 71.2 | -0.1680 | 0.7900  |



|      |      |      |      |    |       |      |         |         |
|------|------|------|------|----|-------|------|---------|---------|
| 2.00 | 2.00 | 2.00 | 1.00 | 15 | 8.50  | 78.0 | -1.5630 | 0.0760  |
| 2.00 | 2.00 | 3.00 | 2.00 | 12 | 8.00  | 62.0 | -1.4600 | -4.3410 |
| 1.00 | 2.00 | 1.00 | 1.00 | 6  | 10.00 | 73.5 | 2.2170  | 2.1140  |
| 2.00 | 1.00 | 3.00 | 2.00 | 18 | 7.30  | 76.0 | -3.0120 | -1.6050 |
| 1.00 | 1.00 | 1.00 | 1.00 | 2  | 5.50  | 60.5 | 0.3920  | 0.9390  |
| 2.00 | 2.00 | 1.00 | 1.00 | 23 | 10.00 | 88.0 | -1.4090 | 0.7370  |
| 1.00 | 1.00 | 2.00 | 1.00 | 7  | 7.40  | 69.0 | -0.3410 | 0.5330  |
| 2.00 | 1.00 | 4.00 | 2.00 | 13 | 9.00  | 79.0 | -1.3610 | 0.6440  |
| 1.00 | 1.00 | 2.00 | 1.00 | 9  | 8.26  | 67.0 | -0.3100 | -1.2620 |
| 2.00 | 1.00 | 3.00 | 2.00 | 5  | 5.10  | 61.0 | -2.2210 | -1.8240 |
| 1.00 | 1.00 | 4.00 | 2.00 | 5  | 7.30  | 73.4 | 0.0030  | 2.7800  |
| 2.00 | 1.00 | 4.00 | 2.00 | 2  | 5.90  | 57.5 | 1.7520  | 0.3090  |
| 1.00 | 1.00 | 3.00 | 2.00 | 7  | 9.80  | 78.0 | 1.4710  | 3.1880  |
| 2.00 | 1.00 | 3.00 | 2.00 | 11 | 7.10  | 72.0 | -2.0950 | -0.3800 |
| 1.00 | 1.00 | 2.00 | 1.00 | 2  | 6.80  | 62.3 | 2.0400  | 1.6390  |
| 2.00 | 1.00 | 3.00 | 2.00 | 12 | 7.90  | 75.1 | -2.2180 | -0.3650 |
| 1.00 | 1.00 | 3.00 | 2.00 | 9  | 11.90 | 76.5 | 2.6170  | 1.5760  |
| 1.00 | 2.00 | 2.00 | 1.00 | 8  | 8.00  | 71.3 | -0.8110 | 0.1260  |
| 1.00 | 1.00 | 3.00 | 2.00 | 6  | 10.50 | 70.0 | 3.5800  | 1.5390  |
| 2.00 | 1.00 | 2.00 | 1.00 | 6  | 6.20  | 57.5 | -1.6870 | -3.8430 |
| 1.00 | 2.00 | 3.00 | 2.00 | 8  | 7.50  | 67.0 | -1.3290 | -1.4960 |
| 2.00 | 2.00 | 3.00 | 2.00 | 13 | 9.20  | 78.2 | -0.5520 | 0.9410  |
| 1.00 | 1.00 | 1.00 | 1.00 | 10 | 8.00  | 62.5 | -0.9240 | -3.3570 |
| 1.00 | 1.00 | 2.00 | 1.00 | 3  | 5.00  | 65.5 | -0.5360 | 2.3960  |
| 2.00 | 2.00 | 3.00 | 2.00 | 18 | 10.30 | 81.5 | -0.9920 | -0.2990 |
| 1.00 | 1.00 | 1.00 | 1.00 | 6  | 6.90  | 68.3 | -0.3540 | 0.8960  |
| 1.00 | 1.00 | 3.00 | 2.00 | 9  | 8.50  | 77.3 | -0.0620 | 2.5060  |
| 1.00 | 1.00 | 2.00 | 1.00 | 2  | 5.20  | 62.1 | 0.0110  | 1.5620  |
| 2.00 | 1.00 | 1.00 | 1.00 | 5  | 7.30  | 65.5 | 0.0030  | -0.1520 |
| 2.00 | 2.00 | 3.00 | 2.00 | 21 | 9.90  | 81.5 | -1.6960 | -1.1240 |
| 1.00 | 1.00 | 2.00 | 1.00 | 7  | 9.90  | 77.6 | 1.5720  | 3.0380  |
| 1.00 | 2.00 | 3.00 | 2.00 | 15 | 9.90  | 76.7 | -0.8920 | -0.9560 |
| 2.00 | 1.00 | 1.00 | 1.00 | 2  | 6.80  | 60.2 | 2.0400  | 0.8230  |
| 2.00 | 1.00 | 1.00 | 1.00 | 22 | 10.10 | 78.5 | -1.6520 | -2.2810 |
| 1.00 | 1.00 | 4.00 | 2.00 | 4  | 6.90  | 68.4 | 0.2390  | 1.7550  |
| 1.00 | 1.00 | 1.00 | 1.00 | 4  | 6.90  | 61.0 | 1.0110  | -0.3820 |
| 2.00 | 1.00 | 1.00 | 1.00 | 24 | 12.40 | 78.4 | 0.0340  | -2.2580 |
| 1.00 | 2.00 | 2.00 | 1.00 | 2  | 6.00  | 62.5 | 1.8990  | 2.3930  |
| 2.00 | 1.00 | 3.00 | 2.00 | 4  | 6.70  | 61.5 | 0.0210  | -0.8180 |
| 1.00 | 1.00 | 1.00 | 1.00 | 2  | 4.20  | 56.0 | -1.1550 | -0.8110 |
| 2.00 | 1.00 | 3.00 | 2.00 | 24 | 12.10 | 89.0 | 0.2160  | 1.3930  |
| 1.00 | 1.00 | 2.00 | 1.00 | 8  | 8.60  | 64.8 | 0.4560  | -1.5770 |
| 1.00 | 1.00 | 1.00 | 1.00 | 8  | 7.70  | 73.3 | -1.1220 | 0.8790  |
| 2.00 | 1.00 | 3.00 | 2.00 | 21 | 9.20  | 74.5 | -1.7980 | -2.9250 |
| 2.00 | 1.00 | 1.00 | 1.00 | 7  | 6.40  | 64.5 | -1.4480 | -1.1500 |
| 1.00 | 1.00 | 3.00 | 2.00 | 13 | 7.10  | 69.5 | -2.5080 | -2.0890 |
| 2.00 | 1.00 | 3.00 | 2.00 | 8  | 7.10  | 67.3 | -1.1300 | -0.6520 |

|      |      |      |      |    |       |      |         |         |
|------|------|------|------|----|-------|------|---------|---------|
| 1.00 | 1.00 | 2.00 | 1.00 | 10 | 10.00 | 79.0 | 0.4340  | 2.0260  |
| 2.00 | 1.00 | 3.00 | 2.00 | 13 | 8.00  | 76.4 | -1.6700 | 0.3140  |
| 1.00 | 1.00 | 3.00 | 2.00 | 11 | 9.60  | 85.0 | 0.3490  | 4.2670  |
| 2.00 | 1.00 | 3.00 | 2.00 | 11 | 9.80  | 72.2 | -0.0610 | -1.0070 |
| 2.00 | 2.00 | 3.00 | 2.00 | 13 | 7.20  | 75.0 | -2.4150 | -0.1740 |
| 1.00 | 1.00 | 3.00 | 2.00 | 3  | 5.10  | 61.0 | -0.4010 | 0.5840  |
| 1.00 | 1.00 | 3.00 | 2.00 | 9  | 7.50  | 71.0 | -1.0970 | 0.2020  |
| 2.00 | 1.00 | 3.00 | 2.00 | 14 | 9.00  | 74.5 | -0.9390 | -0.7410 |
| 1.00 | 2.00 | 2.00 | 1.00 | 5  | 7.00  | 69.5 | -0.3000 | 1.3330  |
| 1.00 | 1.00 | 3.00 | 2.00 | 7  | 9.00  | 70.4 | 0.6660  | 0.3430  |
| 2.00 | 1.00 | 1.00 | 1.00 | 13 | 10.20 | 77.1 | -0.2050 | -0.0500 |
| 2.00 | 1.00 | 3.00 | 2.00 | 10 | 8.20  | 71.0 | -0.7230 | -0.2820 |
| 1.00 | 1.00 | 2.00 | 1.00 | 10 | 9.20  | 76.0 | 0.2780  | 1.5270  |
| 1.00 | 1.00 | 4.00 | 2.00 | 9  | 10.50 | 83.0 | 1.2700  | 4.0340  |
| 2.00 | 1.00 | 1.00 | 1.00 | 3  | 6.60  | 67.0 | 0.7100  | 2.2290  |
| 2.00 | 1.00 | 1.00 | 1.00 | 7  | 8.20  | 67.0 | -0.1440 | -0.9300 |
| 2.00 | 1.00 | 2.00 | 1.00 | 5  | 7.10  | 66.0 | 0.5030  | 0.7370  |
| 1.00 | 1.00 | 3.00 | 2.00 | 11 | 9.30  | 73.0 | -0.5630 | -0.7060 |
| 1.00 | 1.00 | 1.00 | 1.00 | 5  | 6.60  | 63.2 | -0.0650 | -0.3400 |
| 2.00 | 1.00 | 1.00 | 1.00 | 3  | 7.40  | 61.0 | 1.6320  | -0.0400 |
| 1.00 | 1.00 | 2.00 | 1.00 | 9  | 10.60 | 75.9 | 1.3660  | 1.3490  |
| 2.00 | 1.00 | 3.00 | 2.00 | 20 | 7.40  | 82.6 | -3.1690 | -0.0870 |
| 2.00 | 1.00 | 3.00 | 2.00 | 18 | 9.50  | 77.7 | -1.1320 | -1.0510 |
| 1.00 | 1.00 | 1.00 | 1.00 | 2  | 6.10  | 61.1 | 2.0460  | 1.8100  |
| 2.00 | 1.00 | 3.00 | 2.00 | 4  | 5.50  | 55.0 | -1.1950 | -3.2430 |
| 2.00 | 1.00 | 3.00 | 2.00 | 4  | 8.50  | 68.5 | 2.9120  | 2.5590  |
| 1.00 | 1.00 | 2.00 | 1.00 | 9  | 7.70  | 68.6 | -0.8900 | -0.6770 |
| 2.00 | 1.00 | 1.00 | 1.00 | 3  | 5.50  | 60.3 | 0.1300  | 0.3020  |
| 2.00 | 1.00 | 2.00 | 1.00 | 24 | 11.30 | 84.2 | -0.9270 | -0.4370 |
| 1.00 | 1.00 | 1.00 | 1.00 | 2  | 6.00  | 59.5 | 1.8990  | 1.1430  |
| 1.00 | 1.00 | 3.00 | 2.00 | 7  | 9.10  | 82.1 | 0.7660  | 4.7230  |
| 2.00 | 1.00 | 2.00 | 1.00 | 24 | 10.10 | 86.0 | -1.9940 | 0.1280  |
| 2.00 | 2.00 | 3.00 | 2.00 | 24 | 11.20 | 84.0 | -1.0160 | -0.5000 |
| 1.00 | 1.00 | 3.00 | 2.00 | 11 | 10.10 | 74.9 | 0.8370  | 0.6570  |
| 2.00 | 1.00 | 1.00 | 1.00 | 24 | 13.20 | 88.0 | 0.5130  | 0.7570  |
| 2.00 | 1.00 | 1.00 | 1.00 | 12 | 9.50  | 78.1 | -0.6410 | 0.7480  |
| 1.00 | 1.00 | 4.00 | 2.00 | 9  | 7.10  | 69.3 | -1.5110 | -0.4200 |
| 2.00 | 1.00 | 1.00 | 1.00 | 13 | 7.70  | 71.5 | -2.6140 | -2.0960 |
| 1.00 | 1.00 | 3.00 | 2.00 | 3  | 4.70  | 64.2 | -1.3480 | 1.1700  |
| 2.00 | 1.00 | 3.00 | 2.00 | 21 | 12.90 | 74.5 | 1.2740  | -2.9250 |
| 1.00 | 1.00 | 3.00 | 2.00 | 9  | 11.30 | 76.5 | 2.7660  | 2.2140  |
| 1.00 | 1.00 | 4.00 | 2.00 | 6  | 8.40  | 70.5 | 1.2960  | 1.7280  |
| 2.00 | 1.00 | 3.00 | 2.00 | 23 | 11.50 | 91.0 | -0.1850 | 1.6610  |
| 1.00 | 2.00 | 2.00 | 1.00 | 4  | 5.80  | 69.0 | -0.3130 | 2.7550  |
| 2.00 | 1.00 | 2.00 | 1.00 | 2  | 4.50  | 60.2 | -0.8050 | 0.8230  |
| 1.00 | 1.00 | 3.00 | 2.00 | 5  | 6.40  | 69.0 | -0.9070 | 1.1470  |
| 2.00 | 1.00 | 2.00 | 1.00 | 22 | 13.50 | 91.0 | 1.0040  | 1.5290  |

|      |      |      |      |    |       |      |         |         |
|------|------|------|------|----|-------|------|---------|---------|
| 2.00 | 1.00 | 2.00 | 1.00 | 24 | 10.50 | 82.0 | -1.1040 | -0.7760 |
| 1.00 | 1.00 | 3.00 | 2.00 | 8  | 9.80  | 78.0 | 1.0020  | 2.6500  |
| 1.00 | 1.00 | 2.00 | 1.00 | 7  | 7.50  | 68.0 | -0.2310 | 0.1590  |
| 2.00 | 1.00 | 3.00 | 2.00 | 4  | 8.90  | 69.5 | 2.4160  | 2.1650  |
| 2.00 | 1.00 | 3.00 | 2.00 | 24 | 12.40 | 95.6 | 0.4300  | 3.4310  |
| 1.00 | 1.00 | 1.00 | 1.00 | 11 | 8.50  | 71.4 | -1.3670 | -1.3070 |
| 2.00 | 1.00 | 3.00 | 2.00 | 14 | 9.80  | 80.0 | -0.8010 | 0.5930  |
| 1.00 | 1.00 | 2.00 | 1.00 | 10 | 8.20  | 73.0 | -0.7230 | 0.4420  |
| 2.00 | 1.00 | 4.00 | 2.00 | 20 | 9.10  | 80.0 | -1.7470 | -0.9130 |
| 1.00 | 1.00 | 1.00 | 1.00 | 8  | 7.10  | 80.0 | -1.1300 | 4.0430  |
| 2.00 | 1.00 | 3.00 | 2.00 | 23 | 13.50 | 80.0 | 1.4120  | -1.7260 |
| 2.00 | 1.00 | 3.00 | 2.00 | 5  | 6.70  | 69.5 | 0.0520  | 2.0820  |
| 1.00 | 1.00 | 3.00 | 2.00 | 9  | 9.10  | 70.5 | 0.5450  | 0.0190  |
| 2.00 | 1.00 | 4.00 | 2.00 | 5  | 8.20  | 69.3 | 0.9510  | 1.2580  |
| 1.00 | 1.00 | 3.00 | 2.00 | 3  | 5.90  | 64.9 | -0.0870 | 1.4350  |
| 2.00 | 1.00 | 3.00 | 2.00 | 24 | 10.50 | 83.5 | -1.1040 | -0.3080 |
| 1.00 | 1.00 | 3.00 | 2.00 | 11 | 10.10 | 78.2 | 0.2210  | 1.2440  |
| 2.00 | 1.00 | 3.00 | 2.00 | 2  | 4.80  | 54.6 | -0.4560 | -1.3550 |
| 2.00 | 1.00 | 1.00 | 1.00 | 6  | 7.00  | 69.2 | -0.2390 | 1.2360  |
| 1.00 | 1.00 | 3.00 | 2.00 | 9  | 12.00 | 78.5 | 3.4720  | 2.9450  |
| 1.00 | 1.00 | 1.00 | 1.00 | 4  | 7.70  | 66.9 | 1.1100  | 1.1950  |
| 2.00 | 1.00 | 4.00 | 2.00 | 24 | 11.80 | 84.7 | -0.4820 | -0.2800 |
| 2.00 | 1.00 | 3.00 | 2.00 | 23 | 10.00 | 82.5 | -1.8400 | -1.2990 |
| 1.00 | 1.00 | 1.00 | 1.00 | 6  | 8.00  | 67.5 | 0.8610  | 0.5930  |
| 2.00 | 1.00 | 4.00 | 2.00 | 21 | 12.50 | 82.5 | 0.9410  | -0.4100 |
| 1.00 | 1.00 | 3.00 | 2.00 | 12 | 8.60  | 70.0 | -0.8880 | -1.5180 |
| 2.00 | 1.00 | 4.00 | 2.00 | 12 | 8.00  | 72.1 | -1.4600 | -0.7770 |
| 1.00 | 1.00 | 3.00 | 2.00 | 11 | 7.40  | 74.1 | -1.8010 | 0.3710  |
| 1.00 | 1.00 | 4.00 | 2.00 | 7  | 8.80  | 70.3 | 0.4640  | 0.3060  |
| 2.00 | 1.00 | 3.00 | 2.00 | 21 | 15.40 | 90.8 | 2.6630  | 1.7590  |
| 2.00 | 2.00 | 3.00 | 2.00 | 13 | 8.40  | 74.0 | -1.2970 | -0.5220 |
| 1.00 | 2.00 | 2.00 | 1.00 | 8  | 8.50  | 70.6 | -0.2930 | -0.1380 |
| 2.00 | 1.00 | 1.00 | 1.00 | 18 | 11.70 | 84.3 | 0.1880  | 0.6230  |
| 1.00 | 2.00 | 3.00 | 2.00 | 9  | 8.50  | 74.5 | -0.0620 | 1.4820  |
| 1.00 | 1.00 | 2.00 | 1.00 | 4  | 6.00  | 68.8 | -0.0620 | 2.6770  |
| 2.00 | 1.00 | 1.00 | 1.00 | 3  | 6.70  | 62.1 | 1.6770  | 1.0270  |
| 2.00 | 2.00 | 3.00 | 2.00 | 3  | 6.20  | 59.8 | 1.0330  | 0.1010  |
| 1.00 | 1.00 | 2.00 | 1.00 | 12 | 9.00  | 80.0 | -0.5070 | 2.0110  |
| 2.00 | 1.00 | 3.00 | 2.00 | 18 | 12.60 | 77.1 | 0.9210  | -1.7480 |
| 1.00 | 1.00 | 2.00 | 1.00 | 4  | 5.80  | 59.6 | -0.3130 | -0.9310 |
| 2.00 | 1.00 | 3.00 | 2.00 | 2  | 5.30  | 59.2 | 0.1380  | 0.4340  |
| 1.00 | 2.00 | 3.00 | 2.00 | 6  | 6.40  | 64.9 | -0.9280 | -0.3910 |
| 1.00 | 1.00 | 2.00 | 1.00 | 3  | 7.10  | 63.1 | 1.2860  | 0.7540  |
| 1.00 | 1.00 | 2.00 | 1.00 | 7  | 7.00  | 73.5 | -0.7840 | 2.2140  |
| 1.00 | 1.00 | 3.00 | 2.00 | 3  | 5.60  | 55.0 | 0.2590  | -1.8320 |
| 1.00 | 1.00 | 2.00 | 1.00 | 3  | 6.70  | 62.0 | 1.6770  | 0.9870  |
| 2.00 | 1.00 | 3.00 | 2.00 | 8  | 6.40  | 68.5 | -1.8780 | -0.2080 |

|      |      |      |      |    |      |      |         |         |
|------|------|------|------|----|------|------|---------|---------|
| 1.00 | 1.00 | 2.00 | 1.00 | 4  | 6.80 | 68.0 | 0.1300  | 1.6050  |
| 2.00 | 1.00 | 2.00 | 1.00 | 4  | 6.70 | 54.5 | 0.0210  | -3.4290 |
| 1.00 | 1.00 | 1.00 | 1.00 | 5  | 4.50 | 60.5 | -2.5770 | -1.3780 |
| 2.00 | 1.00 | 3.00 | 2.00 | 3  | 4.60 | 54.6 | -1.0730 | -1.9930 |
| 1.00 | 1.00 | 2.00 | 1.00 | 12 | 7.80 | 74.1 | -2.3170 | -0.7360 |
| 2.00 | 2.00 | 2.00 | 1.00 | 18 | 9.00 | 81.3 | -1.5600 | 0.1220  |
| 1.00 | 1.00 | 2.00 | 1.00 | 9  | 7.60 | 71.2 | -1.6310 | -0.4280 |
| 2.00 | 1.00 | 2.00 | 1.00 | 9  | 7.30 | 69.0 | -1.9400 | -1.2610 |
| 1.00 | 1.00 | 3.00 | 2.00 | 5  | 9.20 | 70.5 | 2.8710  | 2.4660  |
| 2.00 | 2.00 | 3.00 | 2.00 | 8  | 8.90 | 68.5 | 0.1160  | -0.9300 |
| 2.00 | 2.00 | 3.00 | 2.00 | 2  | 5.30 | 60.3 | 0.1380  | 0.8620  |
| 1.00 | 2.00 | 3.00 | 2.00 | 3  | 6.50 | 59.5 | 0.5950  | -0.6070 |
| 1.00 | 2.00 | 2.00 | 1.00 | 3  | 6.30 | 69.2 | 0.3650  | 3.0610  |
| 2.00 | 1.00 | 3.00 | 2.00 | 5  | 7.60 | 68.5 | 0.3190  | 0.9620  |

| WHZNCHS | WAZWHO  | HAZWHO  | WHZWHO  | BMIZWHO | WAMNCHS | HAMNCHS | WHMNCHS | VAR00004 |
|---------|---------|---------|---------|---------|---------|---------|---------|----------|
| 0.7770  | 1.3680  | 1.4160  | 0.8270  | 0.8020  | 113.50  | 105.00  | 106.20  | 26.66    |
| 0.1980  | 0.3460  | -0.2300 | 0.6090  | 0.6420  | 98.46   | 98.82   | 101.70  | 10.56    |
| -1.5750 | -0.3470 | 0.9260  | -1.2480 | -1.3300 | 91.47   | 103.20  | 87.77   | 24.89    |
| -1.4960 | -1.2700 | -0.1460 | -1.5400 | -1.6130 | 85.40   | 99.06   | 86.93   | 7.80     |
| -0.5420 | -0.5530 | 0.5810  | -1.4990 | -1.2480 | 100.20  | 102.60  | 93.78   | 2.38     |
| 0.4220  | 1.0500  | 1.1010  | 0.6630  | 0.5590  | 113.40  | 103.20  | 104.10  | 7.57     |
| -1.7040 | -0.0420 | 1.9010  | -1.1810 | -1.5690 | 93.37   | 106.20  | 85.61   | 16.28    |
| -1.3880 | -0.9230 | -0.4680 | -1.0000 | -0.9330 | 83.74   | 98.01   | 87.51   | 11.98    |
| 0.1820  | 0.4850  | 0.7670  | 0.0240  | 0.0620  | 110.80  | 102.80  | 102.00  | 4.78     |
| -1.0690 | -1.2900 | -0.5350 | -1.2550 | -1.3240 | 86.34   | 97.87   | 90.18   | 6.23     |
| 1.4050  | 0.1170  | -1.1550 | 1.2380  | 1.0690  | 106.30  | 96.56   | 116.70  | 3.04     |
| 0.3180  | 1.5170  | 2.0640  | 0.4250  | 0.4670  | 124.20  | 107.10  | 103.20  | 6.36     |
| 0.6890  | -0.1300 | -0.8010 | 0.5430  | 0.4520  | 101.40  | 97.41   | 107.60  | 4.16     |
| -1.4410 | -2.0220 | -1.2340 | -1.7600 | -1.7900 | 78.57   | 95.68   | 86.73   | 6.16     |
| -0.3970 | -3.5650 | -3.1810 | -1.1500 | -2.5490 | 68.53   | 89.84   | 95.03   | 1.03     |
| -0.7280 | -0.8690 | 0.0370  | -1.1530 | -1.2110 | 93.18   | 100.00  | 92.43   | 5.04     |
| 1.5750  | 0.2960  | -1.4220 | 1.5920  | 1.4990  | 104.50  | 95.25   | 117.20  | 4.32     |
| 0.3740  | -2.3350 | -3.9580 | 0.0550  | 0.1690  | 71.41   | 85.95   | 104.20  | 4.35     |
| 1.8440  | 0.4340  | -1.0770 | 1.7490  | 1.4550  | 112.00  | 96.88   | 123.30  | 2.25     |
| 0.9760  | 0.4340  | -0.0980 | 0.7030  | 0.6730  | 112.00  | 100.20  | 111.70  | 2.91     |
| 0.0560  | 0.4630  | 0.8940  | -0.0110 | -0.0520 | 109.70  | 103.00  | 100.60  | 6.16     |
| 0.3260  | -0.4840 | -1.1720 | 0.2840  | 0.2480  | 91.94   | 95.57   | 103.30  | 6.16     |
| 0.3310  | 1.0910  | 1.2140  | 0.6980  | 0.5470  | 110.40  | 103.30  | 103.10  | 10.00    |
| -3.0610 | -0.7350 | 3.3510  | -2.9070 | -3.6390 | 87.68   | 110.00  | 76.27   | 19.47    |
| -0.3450 | -0.9520 | -2.2680 | 0.1810  | 0.6250  | 84.48   | 91.56   | 96.94   | 12.83    |
| 1.6060  | -0.3760 | -2.1960 | 1.3680  | 1.2120  | 94.70   | 92.05   | 118.50  | 4.06     |
| 0.3310  | 1.0250  | 1.4750  | 0.2270  | 0.2890  | 120.70  | 105.40  | 103.50  | 5.73     |
| -1.3910 | 0.1010  | 1.9740  | -1.0170 | -1.3480 | 98.03   | 105.60  | 88.80   | 12.57    |
| -0.4550 | 0.5590  | 1.2240  | 0.0810  | -0.1710 | 100.80  | 103.40  | 96.41   | 15.72    |
| 1.1300  | 1.6090  | 1.2370  | 1.4140  | 1.2560  | 118.90  | 103.80  | 110.00  | 10.17    |
| -0.9110 | -1.0310 | -0.5540 | -0.9040 | -0.9540 | 87.68   | 97.79   | 91.89   | 7.15     |
| 0.3020  | -0.1070 | -0.5810 | 0.3830  | 0.3170  | 98.34   | 97.72   | 103.10  | 6.16     |
| -0.4610 | -0.0130 | 0.1090  | -0.0800 | -0.0910 | 95.33   | 99.89   | 96.23   | 11.22    |
| 0.9930  | -1.4830 | -3.9260 | 0.9970  | 1.2210  | 81.13   | 87.34   | 110.70  | 4.75     |
| 1.8340  | 0.5220  | -1.7770 | 1.8600  | 2.0850  | 100.60  | 93.48   | 117.50  | 7.67     |
| 0.6450  | 1.3580  | 1.2880  | 0.9300  | 0.8210  | 117.30  | 103.80  | 106.30  | 7.87     |
| 3.1760  | 1.5500  | -2.2060 | 3.3630  | 3.9290  | 113.90  | 92.59   | 128.70  | 13.95    |
| 0.8110  | 0.5090  | -0.9340 | 1.2710  | 1.4590  | 100.70  | 96.39   | 106.70  | 15.46    |
| -2.3510 | -2.0670 | -0.6640 | -1.4010 | -2.3770 | 76.06   | 97.49   | 80.36   | 9.77     |
| -2.5190 | -1.2380 | 1.1970  | -1.4040 | -2.6730 | 83.87   | 103.20  | 79.64   | 12.21    |
| -0.5110 | -0.1120 | -0.0430 | -0.1690 | -0.1330 | 97.23   | 101.60  | 95.46   | 23.08    |
| -0.1590 | -0.1400 | -0.6480 | 0.2060  | 0.3320  | 93.59   | 97.53   | 98.69   | 10.73    |
| -0.6430 | -0.3340 | -0.3110 | -0.2620 | -0.2000 | 91.62   | 98.58   | 94.75   | 11.38    |
| 0.1380  | -1.0670 | -3.0310 | 0.6690  | 1.2140  | 84.43   | 88.66   | 101.10  | 13.59    |
| 0.0260  | -0.1120 | -0.9260 | 0.5160  | 0.6660  | 97.23   | 98.49   | 100.30  | 20.09    |
| 0.2050  | 1.7880  | 3.0370  | 0.6880  | 0.1580  | 115.20  | 109.10  | 101.80  | 20.09    |

|         |         |         |         |         |        |        |        |       |
|---------|---------|---------|---------|---------|--------|--------|--------|-------|
| 2.2140  | 0.6550  | -3.7720 | 3.3940  | 4.3200  | 106.10 | 88.32  | 130.40 | 11.88 |
| -0.8720 | -1.0420 | -0.4430 | -0.9830 | -1.0550 | 88.74  | 98.15  | 92.03  | 6.36  |
| -3.8280 | -2.7480 | 1.6150  | -4.9680 | -4.8330 | 75.37  | 105.10 | 65.86  | 7.08  |
| -1.6370 | -0.4650 | 1.5650  | -1.7040 | -1.8240 | 95.72  | 105.10 | 84.25  | 8.39  |
| -1.5850 | -1.3480 | 0.2860  | -2.0050 | -2.0670 | 86.01  | 100.70 | 84.08  | 6.42  |
| -0.5110 | 1.2100  | 2.8150  | -0.6970 | -0.4030 | 125.90 | 110.30 | 94.82  | 6.00  |
| -0.9060 | -1.8320 | -2.0940 | -0.9740 | -0.8090 | 75.74  | 92.39  | 91.05  | 7.15  |
| -1.2840 | -0.9670 | -0.8100 | -0.7510 | -0.6710 | 85.77  | 97.19  | 89.94  | 16.77 |
| -2.1290 | -1.7100 | -0.3700 | -1.2280 | -2.2960 | 81.02  | 100.50 | 81.01  | 21.96 |
| 1.8320  | 2.5920  | 2.2470  | 1.8890  | 1.8530  | 142.80 | 107.70 | 117.20 | 8.16  |
| 1.4920  | 0.3330  | -1.8670 | 1.7510  | 1.8960  | 99.59  | 93.71  | 114.90 | 6.88  |
| -0.3820 | -1.5600 | -2.8840 | -0.1790 | 0.2650  | 79.80  | 90.49  | 96.70  | 8.23  |
| -1.8000 | -1.6890 | 0.7810  | -3.5600 | -3.0290 | 86.69  | 103.30 | 79.54  | 2.51  |
| -0.1320 | -0.2710 | -1.2320 | 0.4490  | 0.6550  | 92.05  | 95.33  | 98.89  | 16.38 |
| -0.6560 | 0.0900  | 1.3360  | -0.9550 | -0.8780 | 107.50 | 104.90 | 93.27  | 5.57  |
| 1.3480  | -0.1120 | -3.6410 | 2.3070  | 3.0920  | 97.23  | 88.79  | 118.40 | 12.21 |
| 0.0980  | 0.5350  | 1.2380  | -0.5320 | -0.1960 | 116.80 | 105.00 | 101.20 | 2.91  |
| 1.5520  | -0.1550 | -2.7490 | 1.6060  | 2.0000  | 91.91  | 90.07  | 115.00 | 7.47  |
| -1.3700 | -0.6710 | -0.1170 | -0.8880 | -0.8860 | 87.95  | 99.40  | 89.01  | 20.62 |
| -2.7900 | -1.8020 | 1.1940  | -3.3430 | -3.3870 | 82.85  | 103.50 | 75.58  | 7.70  |
| -2.7050 | -1.9920 | 0.9990  | -3.5800 | -3.4940 | 82.23  | 103.20 | 75.15  | 6.23  |
| -1.9630 | -0.9130 | 0.5250  | -1.7170 | -1.8320 | 86.72  | 101.90 | 85.03  | 23.74 |
| -1.0050 | 1.4900  | 4.5130  | -0.4870 | -1.2150 | 114.40 | 115.10 | 91.87  | 19.89 |
| -2.8840 | -1.1520 | 2.3730  | -3.3780 | -3.3580 | 90.45  | 107.60 | 75.09  | 8.23  |
| -2.4910 | -0.6330 | 2.3410  | -1.1440 | -2.7390 | 88.67  | 106.90 | 80.50  | 17.03 |
| -0.7960 | -1.0420 | -0.5350 | -0.9110 | -0.9820 | 88.74  | 97.87  | 92.69  | 6.23  |
| -2.0230 | -1.8930 | -0.3270 | -1.2890 | -2.3520 | 79.70  | 98.50  | 82.18  | 7.51  |
| -2.4090 | -1.3620 | 0.6030  | -2.2780 | -2.4290 | 80.07  | 101.70 | 78.40  | 12.24 |
| -0.2160 | 0.8020  | 1.7980  | -0.3180 | -0.2470 | 117.40 | 106.50 | 97.82  | 6.16  |
| -0.1120 | 0.8680  | 1.2680  | 0.4270  | 0.2170  | 104.40 | 104.10 | 99.08  | 18.28 |
| 0.3560  | 2.6260  | 4.5210  | 0.8640  | 0.3710  | 140.10 | 115.30 | 103.00 | 13.68 |
| -1.6350 | -1.4450 | -1.2780 | -1.1500 | -0.9540 | 79.44  | 95.15  | 85.86  | 14.54 |
| -2.4150 | -0.5060 | 2.8370  | -3.2980 | -2.8250 | 100.30 | 110.00 | 77.38  | 5.73  |
| -0.6770 | 0.0740  | 0.4840  | -0.2010 | -0.2910 | 95.21  | 101.30 | 93.91  | 11.98 |
| -0.8230 | -0.4360 | -0.5810 | -0.2350 | -0.1440 | 89.29  | 97.61  | 92.97  | 15.46 |
| -1.3250 | -1.1490 | -0.6640 | -1.1130 | -1.0490 | 84.17  | 97.49  | 88.93  | 9.77  |
| -0.6430 | 0.1380  | 0.7590  | -0.2620 | -0.3840 | 97.50  | 101.90 | 94.75  | 11.38 |
| 0.1600  | -1.8570 | -4.0150 | 0.2990  | 0.8760  | 77.26  | 86.88  | 101.60 | 6.88  |
| -0.6990 | 0.3750  | 1.4750  | -0.4170 | -0.6100 | 103.80 | 104.60 | 93.41  | 9.41  |
| 1.7210  | 0.5880  | -2.9870 | 2.7840  | 3.4310  | 105.30 | 91.13  | 122.90 | 13.95 |
| -0.4750 | -2.2390 | -3.9580 | -0.2230 | 0.4830  | 72.67  | 85.46  | 95.48  | 8.89  |
| -1.3840 | -2.1040 | -2.3390 | -1.2880 | -0.9460 | 72.79  | 91.45  | 86.84  | 8.95  |
| -0.0740 | 0.2290  | 0.6200  | -0.1310 | -0.1690 | 105.50 | 102.00 | 99.31  | 5.73  |
| -2.9710 | -0.9220 | 2.3670  | -2.7390 | -3.2280 | 83.93  | 107.80 | 75.27  | 17.40 |
| -0.8740 | -0.5060 | -0.2690 | -0.5160 | -0.5040 | 88.72  | 98.68  | 91.92  | 10.46 |
| -2.3160 | -1.8580 | 1.0760  | -3.8360 | -3.4150 | 85.24  | 104.10 | 76.12  | 3.86  |
| -2.9220 | -1.4250 | 2.0410  | -3.5300 | -3.4840 | 87.71  | 106.50 | 74.42  | 7.70  |

|         |         |         |         |         |        |        |        |       |
|---------|---------|---------|---------|---------|--------|--------|--------|-------|
| -2.4910 | -2.4970 | -1.8830 | -2.1440 | -1.9900 | 72.52  | 93.64  | 80.50  | 17.03 |
| -1.6750 | 0.0480  | 2.2940  | -1.3340 | -1.6790 | 98.07  | 107.40 | 84.96  | 12.14 |
| -3.1900 | -2.1390 | 1.4730  | -4.1050 | -4.0060 | 80.86  | 104.70 | 71.36  | 6.88  |
| -0.8260 | 0.4340  | 2.0540  | -1.2460 | -0.9620 | 112.00 | 107.40 | 91.94  | 4.85  |
| 0.3180  | -1.8870 | -4.4080 | 0.5210  | 1.2460  | 77.15  | 85.46  | 103.10 | 7.31  |
| -1.0150 | -1.6210 | -0.7280 | -1.5290 | -1.6400 | 83.24  | 97.22  | 89.45  | 5.04  |
| -1.0060 | -0.6160 | -0.3900 | -0.6110 | -0.5620 | 87.08  | 98.25  | 90.82  | 11.19 |
| -1.1710 | 1.5170  | 4.1300  | -0.9650 | -0.9950 | 124.20 | 113.80 | 90.15  | 9.41  |
| 0.0470  | -1.8230 | -3.0930 | -0.0820 | 0.0460  | 78.63  | 89.91  | 100.50 | 5.17  |
| -2.5010 | -0.7160 | 1.9010  | -2.1480 | -2.5620 | 86.03  | 106.20 | 78.87  | 16.28 |
| -1.4370 | -1.2070 | -0.2990 | -1.3720 | -1.4110 | 84.96  | 98.57  | 87.68  | 8.49  |
| -1.4040 | 1.7580  | 4.7940  | -1.3400 | -1.1010 | 130.40 | 116.50 | 87.94  | 8.43  |
| -2.6280 | -1.3320 | 0.8230  | -2.4220 | -2.7090 | 82.34  | 102.60 | 79.77  | 21.40 |
| -0.8860 | 0.4470  | 1.7870  | -0.4760 | -0.7450 | 103.00 | 105.70 | 91.92  | 11.19 |
| 0.6930  | 1.5550  | 1.4160  | 1.0560  | 1.0400  | 118.70 | 106.90 | 107.70 | 29.52 |
| -0.6020 | 0.5710  | 1.9370  | -0.7400 | -0.6580 | 114.10 | 107.00 | 93.94  | 6.36  |
| -0.0700 | -1.2580 | -0.9730 | -0.7300 | -0.9540 | 90.92  | 96.82  | 99.23  | 3.07  |
| -1.3410 | 0.4540  | 2.7220  | -1.4680 | -1.3710 | 112.40 | 109.70 | 86.85  | 7.47  |
| -2.4710 | -1.4120 | 0.3830  | -2.1200 | -2.3750 | 81.23  | 100.90 | 80.65  | 16.94 |
| 1.3340  | -0.7660 | -1.8430 | 1.0900  | 0.3950  | 98.16  | 93.87  | 117.90 | 1.63  |
| 1.2610  | 0.0410  | -2.6320 | 1.7040  | 2.3020  | 96.22  | 91.16  | 111.50 | 12.90 |
| 0.4780  | -1.7540 | -4.7820 | 1.1450  | 2.0440  | 78.84  | 83.21  | 106.80 | 9.12  |
| -2.0930 | -1.6980 | 0.9780  | -3.5200 | -3.1320 | 86.91  | 103.80 | 78.30  | 3.79  |
| -0.1660 | 0.5700  | 0.9400  | 0.0020  | 0.0080  | 103.20 | 103.40 | 98.74  | 27.25 |
| -1.7300 | -0.9820 | -0.1320 | -1.3480 | -1.3470 | 85.28  | 99.41  | 86.38  | 22.55 |
| -0.9480 | -0.6090 | 0.6230  | -1.2780 | -1.3040 | 96.18  | 102.10 | 90.33  | 5.80  |
| -1.6150 | -1.0020 | 0.9390  | -2.0890 | -2.0760 | 91.67  | 103.10 | 83.71  | 6.23  |
| -0.5040 | 0.8600  | 1.9120  | 0.0840  | -0.2640 | 105.00 | 106.20 | 95.67  | 15.10 |
| 0.3020  | -1.2120 | -1.4910 | -0.2150 | -0.4670 | 91.31  | 95.46  | 103.70 | 2.78  |
| -0.1590 | -1.4260 | -3.2780 | 0.2060  | 0.9000  | 81.48  | 89.03  | 98.69  | 10.73 |
| 0.8100  | 1.3320  | 1.1730  | 1.0570  | 0.9180  | 116.80 | 103.60 | 107.40 | 8.89  |
| 0.1770  | 0.2150  | 0.6760  | -0.3200 | -0.2230 | 111.10 | 102.80 | 102.10 | 3.60  |
| -0.8850 | -0.5120 | 1.0410  | -1.8780 | -1.4870 | 101.90 | 104.30 | 90.12  | 2.78  |
| -1.9660 | 0.3460  | 3.3670  | -1.8970 | -2.0320 | 106.90 | 110.80 | 83.58  | 9.77  |
| 0.0350  | -0.8780 | -2.5890 | 0.4550  | 1.0300  | 86.63  | 91.31  | 100.30 | 12.30 |
| -1.8340 | -1.4000 | 0.4470  | -2.2030 | -2.2560 | 86.67  | 101.20 | 83.39  | 6.62  |
| -0.1300 | 0.6030  | 1.5310  | -0.7780 | -0.3290 | 115.60 | 105.90 | 98.58  | 3.04  |
| -1.7590 | -1.1910 | -0.4680 | -1.2960 | -1.3030 | 83.36  | 98.23  | 86.15  | 15.79 |
| -1.7310 | -1.1770 | 0.3490  | -1.7950 | -1.9100 | 84.58  | 100.80 | 83.42  | 8.59  |
| -2.5420 | -1.7030 | -0.2170 | -2.2330 | -2.2850 | 76.57  | 98.91  | 78.29  | 15.46 |
| -2.4420 | -0.8860 | 2.0350  | -1.6220 | -2.7560 | 91.77  | 106.20 | 79.30  | 9.02  |
| 0.4210  | 1.3330  | 1.5540  | 0.9060  | 0.6640  | 112.10 | 104.90 | 103.50 | 13.06 |
| 3.7870  | 1.8710  | -1.2730 | 3.8570  | 3.5950  | 132.00 | 96.23  | 148.40 | 2.12  |
| -1.7240 | -1.2490 | -0.2690 | -1.5380 | -1.5460 | 81.15  | 98.68  | 84.07  | 10.46 |
| -1.8490 | -0.7230 | 1.3460  | -1.8640 | -2.0340 | 90.81  | 104.20 | 82.49  | 9.18  |
| -0.7960 | -1.8090 | -1.5950 | -1.1310 | -1.1990 | 78.46  | 94.12  | 91.84  | 5.57  |
| -2.6160 | -3.4030 | -1.0010 | -3.9270 | -3.9240 | 68.83  | 96.58  | 74.40  | 4.78  |

|         |         |         |         |         |        |        |        |       |
|---------|---------|---------|---------|---------|--------|--------|--------|-------|
| 2.1900  | 0.3810  | -2.7600 | 2.3190  | 2.8220  | 100.40 | 89.71  | 118.30 | 13.68 |
| -2.2430 | -0.6390 | 2.1280  | -2.3290 | -2.4790 | 94.32  | 106.50 | 81.05  | 9.18  |
| -1.3690 | -0.7030 | -0.0840 | -0.8530 | -0.9240 | 88.35  | 99.59  | 89.36  | 18.74 |
| -1.3550 | -0.5560 | 1.3360  | -1.8760 | -1.7530 | 99.19  | 104.90 | 86.10  | 5.57  |
| 0.9700  | -0.5530 | -1.2190 | 0.8450  | 0.1810  | 100.20 | 96.41  | 113.40 | 1.33  |
| -2.7170 | -0.2370 | 3.7970  | -2.4980 | -3.1580 | 95.65  | 111.30 | 78.49  | 14.87 |
| -1.3420 | -0.6290 | 0.9990  | -1.6120 | -1.6170 | 95.93  | 103.20 | 87.68  | 6.23  |
| 0.0210  | 0.4370  | 0.6170  | 0.2310  | 0.1230  | 104.30 | 101.50 | 100.20 | 7.93  |
| 0.9580  | 0.1010  | -1.4140 | 1.1860  | 1.2420  | 98.03  | 95.12  | 109.60 | 6.75  |
| -1.5000 | -1.3490 | -1.0680 | -1.1860 | -1.0070 | 81.67  | 96.24  | 87.81  | 11.71 |
| -2.2670 | 0.5760  | 4.3150  | -2.1400 | -2.3870 | 109.60 | 113.80 | 81.51  | 11.38 |
| 0.5310  | -0.8370 | -1.0210 | 0.1200  | -0.3880 | 97.69  | 96.90  | 107.20 | 1.36  |
| -1.6070 | -0.3590 | 1.1340  | -1.3040 | -1.4880 | 92.00  | 103.70 | 87.73  | 23.51 |
| -0.8280 | 0.8070  | 2.5100  | -0.3160 | -0.7790 | 104.80 | 107.30 | 93.45  | 14.87 |
| -0.8270 | -0.6110 | -0.9320 | -0.2580 | -0.0920 | 87.41  | 96.36  | 92.85  | 14.54 |
| 1.5520  | 0.7320  | -0.8880 | 1.6060  | 1.6600  | 105.10 | 96.52  | 115.00 | 7.47  |
| -2.0120 | -2.1340 | -1.4660 | -1.8540 | -1.7930 | 75.45  | 95.87  | 80.93  | 18.28 |
| -0.2680 | 0.6960  | 1.3500  | 0.1220  | -0.0720 | 104.60 | 103.70 | 97.81  | 11.38 |
| -2.3920 | -2.3090 | -1.6040 | -2.1830 | -1.9520 | 73.60  | 94.54  | 80.83  | 13.06 |
| -0.7310 | 0.7500  | 2.2290  | -0.3950 | -0.6510 | 107.90 | 106.50 | 93.97  | 10.56 |
| -1.9330 | -0.8030 | 0.4990  | -1.4370 | -1.5910 | 85.18  | 101.40 | 83.89  | 17.33 |
| 4.4580  | 1.5590  | -2.0360 | 4.1350  | 3.7570  | 128.90 | 93.11  | 158.10 | 2.22  |
| -2.1800 | -1.4690 | 0.7410  | -1.5000 | -2.6060 | 83.03  | 102.10 | 78.94  | 8.16  |
| -2.2140 | -2.4000 | -2.1500 | -1.8170 | -1.5590 | 73.33  | 92.72  | 82.61  | 16.28 |
| -1.9500 | -1.7100 | -0.6970 | -1.9470 | -1.9650 | 81.02  | 99.31  | 82.52  | 20.85 |
| -1.4380 | -1.9310 | -1.3250 | -1.6120 | -1.5960 | 78.42  | 95.39  | 87.09  | 6.88  |
| 3.8160  | 4.1320  | 2.1260  | 3.9150  | 3.6310  | 147.10 | 106.20 | 134.20 | 15.33 |
| 4.0660  | -0.1290 | -4.8150 | 4.0670  | 3.7500  | 96.78  | 84.55  | 150.20 | 2.51  |
| -0.6480 | 0.3280  | 1.4330  | -0.5090 | -0.6400 | 105.40 | 104.70 | 93.74  | 8.16  |
| -0.5020 | 0.2730  | 1.0430  | -0.2790 | -0.4320 | 102.50 | 103.10 | 95.20  | 8.69  |
| -0.3950 | -0.7900 | -1.8260 | 0.0950  | 0.4820  | 87.49  | 93.83  | 96.86  | 14.14 |
| -1.3550 | -0.5560 | 1.3360  | -1.8760 | -1.7530 | 99.19  | 104.90 | 86.10  | 5.57  |
| -1.2020 | -0.7230 | -0.3920 | -0.7730 | -0.7140 | 85.78  | 98.28  | 89.21  | 12.14 |
| -0.5050 | -0.5770 | -1.1720 | 0.0320  | 0.1900  | 89.54  | 95.56  | 95.88  | 19.07 |
| -2.6390 | -0.3330 | 3.3800  | -2.5320 | -2.9820 | 95.94  | 110.10 | 78.76  | 12.63 |
| 0.1650  | -0.8650 | -0.6190 | -0.4300 | -0.7570 | 96.32  | 98.48  | 102.20 | 1.63  |
| 1.0970  | 3.2980  | 4.1450  | 1.2290  | 1.4870  | 163.00 | 115.00 | 110.40 | 7.84  |
| -2.5450 | -1.9900 | -0.7330 | -2.2640 | -2.2740 | 76.26  | 97.37  | 79.89  | 15.13 |
| -1.8930 | -2.3680 | -1.1780 | -2.3180 | -2.3250 | 72.43  | 95.53  | 81.25  | 7.01  |
| -0.6900 | 0.1710  | 0.8910  | -0.2970 | -0.4620 | 98.13  | 102.60 | 93.65  | 10.63 |
| 1.2300  | -0.5170 | -2.0760 | 1.1180  | 0.9580  | 95.60  | 93.19  | 113.90 | 3.70  |
| -0.8640 | -0.2600 | 0.1110  | -0.4140 | -0.4350 | 92.20  | 99.95  | 93.09  | 13.26 |
| -2.0150 | 0.2940  | 3.5710  | -1.6470 | -2.2480 | 101.30 | 110.60 | 84.00  | 14.41 |
| 0.1240  | -1.1400 | -1.5620 | -0.1700 | -0.2920 | 89.22  | 94.81  | 101.40 | 4.19  |
| -0.4740 | -0.5710 | -1.1480 | 0.0530  | 0.2230  | 90.25  | 96.17  | 96.32  | 19.27 |
| -2.9070 | -0.4240 | 3.8020  | -2.6930 | -3.4340 | 92.58  | 111.30 | 77.17  | 16.28 |
| 4.2850  | 0.8690  | -3.1030 | 3.8240  | 3.6220  | 110.30 | 88.94  | 152.60 | 3.10  |



|         |         |         |         |         |        |        |        |       |
|---------|---------|---------|---------|---------|--------|--------|--------|-------|
| -0.8450 | -1.8780 | -3.1250 | -0.3190 | 0.2300  | 76.75  | 88.31  | 92.56  | 13.32 |
| 0.4040  | -0.0450 | -0.4870 | 0.3990  | 0.3230  | 100.70 | 98.20  | 104.20 | 5.40  |
| 0.4030  | 1.0930  | 0.9670  | 0.8620  | 0.7390  | 107.50 | 102.60 | 103.70 | 12.90 |
| -0.1150 | 0.3630  | 0.4360  | 0.2500  | 0.1490  | 100.50 | 101.10 | 98.92  | 9.77  |
| -1.7320 | -1.5630 | -0.4330 | -1.7720 | -1.8060 | 81.69  | 98.16  | 85.07  | 8.30  |
| -0.8090 | -0.4840 | 0.1380  | -0.6870 | -0.7850 | 91.94  | 100.10 | 92.19  | 8.26  |
| -1.8430 | -0.8150 | 0.6430  | -1.5300 | -1.6750 | 85.48  | 101.80 | 83.50  | 12.30 |
| -1.1350 | -0.2370 | 0.9870  | -0.9050 | -1.0620 | 95.65  | 102.60 | 90.49  | 9.64  |
| -0.0930 | 0.1100  | 0.4780  | -0.1810 | -0.2190 | 104.20 | 101.50 | 99.13  | 5.57  |
| -2.7210 | -1.9420 | 0.6880  | -3.1190 | -3.2360 | 77.23  | 101.90 | 74.24  | 9.18  |
| -0.0990 | -1.2070 | -2.7470 | 0.1830  | 0.6450  | 81.00  | 90.00  | 99.06  | 8.89  |
| -0.9980 | -1.0450 | -0.4110 | -1.0540 | -1.1220 | 85.93  | 98.17  | 90.19  | 7.34  |
| -2.2120 | -2.4060 | -1.5320 | -2.2980 | -2.1400 | 72.90  | 94.76  | 81.28  | 9.08  |
| -3.1380 | -0.1600 | 4.6610  | -2.9750 | -3.6380 | 95.62  | 115.50 | 73.79  | 17.13 |
| 1.2760  | 0.0220  | -1.8100 | 1.3030  | 1.4430  | 95.29  | 93.34  | 112.60 | 6.82  |
| 0.4030  | 1.0930  | 0.9670  | 0.8620  | 0.7390  | 107.50 | 102.60 | 103.70 | 12.90 |
| 3.4080  | 2.8600  | 0.9920  | 3.0710  | 3.1000  | 144.30 | 103.10 | 132.80 | 7.47  |
| -1.0230 | -2.9060 | -1.8760 | -2.2370 | -2.5440 | 74.84  | 94.20  | 88.38  | 2.51  |
| -2.5250 | -1.9920 | 0.7620  | -3.4060 | -3.3240 | 82.23  | 102.40 | 76.53  | 5.93  |
| -0.0250 | 0.8030  | 1.0440  | 0.2470  | 0.2300  | 107.70 | 105.50 | 99.78  | 28.01 |
| -0.6210 | -1.2820 | -2.1370 | -0.2210 | 0.1150  | 85.07  | 94.17  | 94.22  | 16.38 |
| -2.6630 | -0.3330 | 3.4260  | -2.5570 | -3.0150 | 95.94  | 110.20 | 78.58  | 12.73 |
| -0.0450 | 0.6780  | 0.7960  | 0.2510  | 0.2550  | 106.00 | 104.50 | 99.60  | 27.02 |
| -1.0230 | -2.0200 | -0.6860 | -2.2370 | -2.3040 | 83.57  | 98.19  | 88.38  | 2.51  |
| -1.0530 | 0.4370  | 2.1370  | -0.7560 | -1.0050 | 104.30 | 106.20 | 91.30  | 10.40 |
| -1.3740 | -0.5850 | 1.0360  | -1.4990 | -1.5940 | 94.34  | 103.30 | 86.54  | 7.54  |
| -1.4650 | -1.4060 | 0.4120  | -2.3100 | -2.2220 | 89.27  | 101.70 | 84.51  | 4.45  |
| -0.9410 | -1.0850 | 0.2930  | -1.8970 | -1.7430 | 93.60  | 101.50 | 89.87  | 3.20  |
| 0.3020  | -0.1600 | -0.7070 | 0.3550  | 0.3170  | 95.62  | 97.16  | 103.00 | 6.88  |
| -0.8900 | -1.5360 | -2.1690 | -0.5520 | -0.2270 | 82.64  | 94.05  | 91.71  | 16.28 |
| -0.4420 | 0.4570  | 1.0570  | -0.0090 | -0.1900 | 101.60 | 103.20 | 95.95  | 10.96 |
| -1.3740 | -0.5120 | 1.6300  | -2.5020 | -1.9040 | 101.90 | 106.40 | 84.91  | 3.24  |
| -2.4260 | -2.2570 | 0.5270  | -3.7350 | -3.5170 | 80.83  | 102.10 | 75.94  | 4.52  |
| 2.7650  | 2.7120  | 1.3360  | 2.5120  | 2.6670  | 148.80 | 104.90 | 129.10 | 5.57  |
| -2.9130 | -2.2650 | -0.6780 | -2.6820 | -2.8020 | 74.27  | 97.69  | 77.30  | 18.05 |
| -2.4900 | -0.9700 | 2.3060  | -3.2440 | -3.0110 | 94.23  | 108.30 | 75.26  | 6.88  |
| 0.5500  | 0.7390  | 0.8810  | 0.1060  | 0.3540  | 117.50 | 103.60 | 106.80 | 2.58  |
| -1.6050 | 0.1680  | 2.4690  | -1.3220 | -1.6240 | 101.20 | 108.00 | 85.35  | 11.19 |
| -0.4750 | 0.7460  | 1.8740  | -0.2230 | -0.3890 | 111.00 | 106.20 | 95.48  | 8.89  |
| -2.1960 | -1.1530 | 0.6150  | -1.9270 | -2.1150 | 83.74  | 101.50 | 82.42  | 13.26 |
| 0.0050  | 0.4460  | 0.1840  | 0.4890  | 0.4770  | 99.51  | 100.20 | 100.00 | 14.41 |
| -1.1470 | -3.4870 | -3.0680 | -2.1480 | -2.3700 | 67.16  | 89.95  | 87.81  | 3.40  |
| 0.8770  | 0.8070  | -0.2910 | 1.2510  | 1.3000  | 104.80 | 98.60  | 108.30 | 9.48  |
| -0.2420 | 0.1040  | -0.0430 | 0.1370  | 0.1840  | 99.66  | 101.60 | 97.85  | 23.08 |
| -0.5450 | -0.9230 | -1.6080 | -0.2230 | 0.0260  | 83.74  | 94.04  | 94.88  | 9.64  |
| -1.6690 | 1.2100  | 4.3830  | -1.7820 | -1.4560 | 125.90 | 115.90 | 83.87  | 8.16  |
| -0.5260 | -0.6290 | 0.0040  | -0.8170 | -0.8510 | 95.93  | 99.99  | 94.91  | 5.01  |

|         |         |         |         |         |        |        |        |       |
|---------|---------|---------|---------|---------|--------|--------|--------|-------|
| 0.3850  | 0.0050  | -0.0990 | 0.1540  | 0.0740  | 103.70 | 99.56  | 104.20 | 4.88  |
| -1.0210 | -0.7570 | 0.4300  | -1.3470 | -1.3570 | 94.56  | 101.40 | 90.34  | 5.50  |
| -1.0640 | -0.5850 | 0.6390  | -1.2070 | -1.2940 | 94.34  | 101.90 | 89.44  | 6.95  |
| -3.0230 | -2.6790 | -1.3170 | -2.8470 | -2.8350 | 70.90  | 95.55  | 76.26  | 16.28 |
| -0.2360 | -0.1140 | 0.4420  | -0.4480 | -0.4970 | 102.20 | 101.40 | 97.58  | 5.57  |
| 0.6750  | 0.8130  | 0.7820  | 0.4790  | 0.5080  | 117.50 | 102.90 | 107.40 | 4.88  |
| -0.1030 | 0.8220  | 1.2640  | 0.3620  | 0.1620  | 106.30 | 103.90 | 99.07  | 11.35 |
| -2.3940 | -1.7030 | 0.1470  | -2.4070 | -2.5010 | 79.67  | 99.96  | 80.16  | 10.23 |
| -1.8860 | -1.4630 | -0.5070 | -1.7000 | -1.6590 | 78.68  | 97.84  | 82.72  | 10.96 |
| -0.7340 | 0.4870  | 1.3960  | -0.1490 | -0.4140 | 99.67  | 104.40 | 93.70  | 15.10 |
| -1.9040 | -1.4370 | -0.6560 | -1.5600 | -1.4930 | 80.94  | 97.59  | 84.79  | 13.52 |
| 0.3320  | 0.8380  | 0.6220  | 0.7630  | 0.6660  | 105.40 | 101.70 | 102.90 | 11.19 |
| -1.6840 | -1.2260 | 1.0560  | -2.7850 | -2.4550 | 92.61  | 104.10 | 81.93  | 3.96  |
| -1.6390 | 0.1010  | 2.4200  | -1.2550 | -1.6810 | 98.03  | 107.00 | 86.90  | 13.42 |
| -1.6820 | -0.6470 | 0.6880  | -1.2540 | -1.4510 | 88.35  | 101.80 | 86.66  | 14.51 |
| -0.8880 | 0.8730  | 2.7800  | -1.5520 | -0.8660 | 119.40 | 110.20 | 90.95  | 4.06  |
| 2.1830  | 2.0390  | 0.7670  | 2.2600  | 2.1880  | 123.80 | 102.20 | 119.20 | 10.40 |
| -2.7230 | -2.3120 | -1.1240 | -2.4340 | -2.4490 | 73.94  | 96.21  | 78.74  | 17.63 |
| -1.8800 | -1.0280 | 0.3260  | -1.6280 | -1.7230 | 83.31  | 100.70 | 82.98  | 11.65 |
| -0.0150 | 1.0850  | 1.6240  | 0.5520  | 0.2650  | 107.20 | 105.30 | 99.88  | 16.84 |
| -0.2250 | 0.9470  | 1.8740  | 0.0500  | -0.1150 | 113.80 | 106.20 | 97.86  | 8.89  |
| 2.8920  | 2.2580  | 0.4390  | 2.6960  | 2.6920  | 131.00 | 101.10 | 127.60 | 7.67  |
| -3.1830 | -2.4090 | -0.3010 | -3.1480 | -3.2760 | 72.66  | 98.72  | 74.71  | 14.31 |
| -1.6770 | -2.2860 | -1.2790 | -2.1010 | -2.1300 | 76.29  | 95.54  | 84.52  | 6.09  |
| -1.5710 | -0.4730 | 1.1950  | -1.3850 | -1.5840 | 92.06  | 103.70 | 85.38  | 10.10 |
| -1.4380 | -1.2490 | -0.6660 | -1.2610 | -1.2170 | 81.15  | 97.31  | 86.52  | 9.71  |
| -1.1040 | -0.7980 | 0.0350  | -1.0180 | -1.0980 | 89.95  | 99.63  | 90.43  | 8.07  |
| -0.5690 | -1.5970 | -2.2950 | -0.5180 | -0.3190 | 80.12  | 92.41  | 94.91  | 7.01  |
| 0.8500  | -0.3950 | -1.1550 | 0.5570  | 0.3790  | 100.30 | 96.56  | 110.10 | 3.04  |
| -0.2400 | 0.4340  | 1.0800  | -0.1240 | -0.2340 | 106.80 | 103.40 | 97.65  | 7.61  |
| -1.9630 | -0.9130 | 0.5250  | -1.7170 | -1.8320 | 86.72  | 101.90 | 85.03  | 23.74 |
| -1.3840 | -2.1040 | -2.3390 | -1.2880 | -0.9460 | 72.79  | 91.45  | 86.84  | 8.95  |
| -1.2810 | -3.3700 | -2.3170 | -2.5650 | -2.8460 | 69.89  | 92.55  | 85.82  | 2.84  |
| -0.8820 | -1.7540 | -2.6430 | -0.4530 | -0.0630 | 78.84  | 91.37  | 91.09  | 14.74 |
| -1.2660 | 1.2420  | 4.1530  | -0.7340 | -1.3060 | 115.50 | 113.80 | 89.03  | 14.44 |
| -2.9070 | -0.6290 | 3.2250  | -3.1990 | -3.2570 | 95.93  | 110.30 | 75.61  | 9.54  |
| -0.5290 | -0.3480 | -0.6290 | -0.0750 | 0.0100  | 93.25  | 99.07  | 95.16  | 21.04 |
| 2.1730  | 1.4400  | -0.8340 | 2.4390  | 2.5000  | 113.30 | 96.91  | 121.30 | 7.64  |
| -0.6560 | 0.8510  | 2.4820  | -0.9550 | -0.6580 | 120.40 | 109.20 | 93.27  | 5.57  |
| -0.9960 | -0.7950 | -0.5990 | -0.7000 | -0.6370 | 89.93  | 99.66  | 91.09  | 21.17 |
| -1.8960 | -1.1380 | 0.0840  | -1.7620 | -1.8350 | 84.77  | 101.80 | 83.00  | 23.54 |
| 1.3550  | 1.1300  | 0.0990  | 1.4490  | 1.4090  | 116.50 | 100.30 | 114.30 | 5.11  |
| -0.2400 | 0.4340  | 1.0800  | -0.1240 | -0.2340 | 106.80 | 103.40 | 97.65  | 7.61  |
| -0.1330 | 0.0700  | 0.3530  | -0.0890 | -0.1720 | 102.00 | 100.90 | 98.79  | 6.49  |
| -0.6010 | -0.3320 | -0.0610 | -0.3630 | -0.4250 | 92.29  | 99.36  | 94.28  | 8.89  |
| -2.9480 | -1.2600 | 1.8010  | -2.7320 | -3.2640 | 82.59  | 105.30 | 76.92  | 17.03 |
| -1.1870 | -1.3950 | -1.5590 | -0.7720 | -0.6230 | 82.23  | 95.52  | 88.70  | 17.99 |

|         |         |         |         |         |        |        |        |       |
|---------|---------|---------|---------|---------|--------|--------|--------|-------|
| 0.1970  | 0.6030  | 1.1510  | -0.2110 | -0.0460 | 116.70 | 104.50 | 102.30 | 4.06  |
| 0.7560  | 0.9120  | 0.5250  | 0.8450  | 0.8040  | 113.70 | 101.70 | 107.80 | 5.63  |
| -0.6570 | -1.8580 | -0.9300 | -1.6810 | -1.8750 | 85.24  | 97.37  | 92.44  | 2.35  |
| -1.8550 | -1.6210 | 0.2860  | -2.3930 | -2.4410 | 83.24  | 100.70 | 81.37  | 6.42  |
| -3.7240 | -1.7750 | 2.2830  | -3.7630 | -4.3560 | 77.92  | 106.80 | 71.13  | 19.47 |
| -1.0420 | 0.3630  | 1.8020  | -0.5780 | -0.8780 | 100.50 | 105.80 | 90.69  | 12.40 |
| -0.1700 | 1.3580  | 2.5020  | 0.1500  | -0.0550 | 117.30 | 107.60 | 98.58  | 9.77  |
| -0.2990 | -0.7570 | -0.4220 | -0.6350 | -0.6910 | 94.56  | 98.62  | 97.03  | 4.52  |
| -1.0320 | -0.4190 | -0.0020 | -0.5910 | -0.6020 | 89.17  | 99.59  | 90.71  | 11.98 |
| 3.8050  | 0.8120  | -2.6420 | 4.2170  | 3.2970  | 117.00 | 91.64  | 152.70 | 1.33  |
| 0.5490  | 0.0740  | -1.1020 | 0.8170  | 0.9550  | 95.21  | 95.81  | 105.00 | 8.89  |
| -2.3250 | -1.5440 | -0.3490 | -1.9090 | -1.9440 | 78.52  | 98.49  | 80.56  | 17.03 |
| -0.2380 | 1.0580  | 2.0370  | 0.1690  | -0.0790 | 112.90 | 106.50 | 97.80  | 10.40 |
| -3.0570 | -1.7860 | 0.4280  | -2.8730 | -3.0490 | 76.85  | 101.40 | 75.66  | 21.34 |
| -0.8590 | -1.8160 | -2.4160 | -0.7870 | -0.5180 | 77.83  | 92.00  | 92.45  | 7.57  |
| 1.0710  | 1.3280  | 0.6880  | 1.3110  | 1.3150  | 112.00 | 102.50 | 108.90 | 26.23 |
| -0.9850 | -0.6170 | -0.2350 | -0.6700 | -0.6500 | 89.25  | 98.82  | 91.88  | 10.56 |
| 2.0930  | 2.7090  | 2.0070  | 1.9050  | 2.2000  | 151.90 | 107.50 | 122.80 | 4.98  |
| 2.1900  | 1.8860  | 0.4810  | 2.1330  | 2.2730  | 134.80 | 102.30 | 127.50 | 2.32  |
| 0.4190  | -0.0190 | -1.1020 | 0.6940  | 0.8290  | 94.13  | 95.81  | 103.80 | 8.89  |
| -0.6820 | 0.4300  | 1.4160  | -0.2500 | -0.4820 | 100.60 | 103.90 | 94.51  | 12.63 |
| -2.0270 | -1.2600 | 0.0290  | -1.7310 | -1.8000 | 82.59  | 99.69  | 83.75  | 13.06 |
| -2.5650 | -1.3920 | 1.2140  | -2.6650 | -2.8650 | 84.26  | 103.30 | 78.66  | 10.00 |
| -2.1560 | -2.2570 | 0.1900  | -3.4510 | -3.2740 | 80.83  | 101.00 | 78.20  | 4.19  |
| 0.0200  | 0.1850  | 0.8310  | -0.6580 | -0.3890 | 109.80 | 103.50 | 100.30 | 2.55  |
| 0.4020  | 0.1220  | 0.0370  | 0.1990  | 0.1290  | 105.20 | 100.00 | 104.40 | 5.04  |
| -1.0140 | -0.6170 | -0.1920 | -0.6980 | -0.6840 | 89.25  | 98.95  | 91.65  | 10.66 |
| -1.6720 | -1.0280 | 0.0080  | -1.4190 | -1.4630 | 83.31  | 99.64  | 84.70  | 11.02 |
| -2.4320 | -1.7040 | 0.9990  | -3.1810 | -3.1130 | 84.97  | 103.20 | 77.66  | 6.23  |
| -1.4820 | -1.4150 | -1.3920 | -0.9400 | -0.7930 | 81.01  | 94.74  | 87.81  | 18.38 |
| 1.1790  | 0.5350  | -0.0390 | 0.8500  | 0.7600  | 116.80 | 100.40 | 115.60 | 1.99  |
| -1.6960 | 0.6830  | 3.6000  | -1.5100 | -1.6790 | 112.70 | 112.40 | 84.31  | 10.40 |
| -0.9230 | -1.3550 | -1.2830 | -0.9070 | -0.8450 | 80.72  | 95.15  | 90.99  | 7.67  |
| -1.0640 | -0.2640 | 0.1770  | -0.4770 | -0.5370 | 90.92  | 100.30 | 91.04  | 16.48 |
| -0.7040 | -2.5570 | -2.7300 | -1.2150 | -1.2820 | 74.01  | 91.03  | 92.94  | 4.32  |
| 1.1680  | 1.2590  | 0.1910  | 1.5380  | 1.5170  | 111.10 | 100.10 | 111.10 | 9.31  |
| -1.3230 | -0.2600 | 0.8940  | -0.8370 | -1.0610 | 92.20  | 102.40 | 89.53  | 14.97 |
| -0.1540 | 1.2660  | 2.3840  | 0.3760  | -0.0670 | 109.50 | 107.00 | 98.79  | 15.89 |
| 0.4140  | -0.2780 | -0.8140 | 0.3510  | 0.2680  | 98.14  | 97.17  | 104.40 | 5.01  |
| 0.8030  | 0.6540  | -0.5900 | 1.2600  | 1.3800  | 102.50 | 97.62  | 106.60 | 16.38 |
| -0.6690 | -0.6070 | -0.7060 | -0.3600 | -0.2930 | 87.64  | 97.18  | 93.72  | 9.64  |
| -1.4340 | -2.3650 | -1.2350 | -1.1950 | -2.2660 | 77.75  | 95.84  | 85.78  | 4.52  |
| -0.8590 | -1.5970 | -1.9520 | -0.7870 | -0.6090 | 80.12  | 93.48  | 92.45  | 7.57  |
| -0.0720 | -0.0130 | -0.4490 | 0.2680  | 0.3440  | 95.33  | 98.15  | 99.41  | 10.17 |
| -1.7780 | -0.8220 | 0.9410  | -1.7070 | -1.8780 | 88.26  | 102.80 | 83.31  | 9.64  |
| 1.6350  | -0.2640 | -1.8760 | 1.4860  | 1.1420  | 101.80 | 94.20  | 120.20 | 2.51  |
| -1.4040 | 0.8250  | 3.4770  | -0.8850 | -1.4330 | 107.90 | 111.50 | 87.85  | 14.54 |

|         |         |         |         |         |        |        |        |       |
|---------|---------|---------|---------|---------|--------|--------|--------|-------|
| -1.1640 | -1.3120 | -1.6300 | -0.7820 | -0.4600 | 82.13  | 94.47  | 90.59  | 12.21 |
| 1.8100  | 2.0670  | 1.3450  | 1.7810  | 1.7840  | 133.80 | 104.60 | 117.90 | 6.82  |
| 1.5120  | 0.9470  | -0.1550 | 1.4320  | 1.3780  | 113.80 | 99.19  | 115.70 | 5.80  |
| -1.4430 | -1.3480 | 0.1100  | -1.8620 | -1.9300 | 86.01  | 100.10 | 85.42  | 6.16  |
| -1.4010 | -0.7230 | -0.0870 | -0.9640 | -0.9650 | 85.78  | 99.34  | 87.56  | 12.83 |
| -0.3630 | -0.4460 | -1.1730 | 0.1740  | 0.3940  | 90.92  | 95.99  | 97.15  | 15.79 |
| -1.4900 | -1.2600 | -0.8370 | -1.1990 | -1.0720 | 82.59  | 96.97  | 87.83  | 11.29 |
| 0.9020  | 1.4130  | 1.2710  | 0.7840  | 0.9470  | 125.40 | 104.70 | 110.00 | 4.06  |
| -1.0580 | -0.7100 | -0.7530 | -0.5180 | -0.3880 | 86.14  | 97.01  | 90.79  | 14.11 |
| -0.6000 | -1.1500 | -1.0980 | -0.6510 | -0.6810 | 86.54  | 96.10  | 94.51  | 6.36  |
| -1.3020 | 1.1540  | 4.0710  | -0.8530 | -1.4220 | 112.70 | 112.30 | 89.63  | 13.95 |
| 0.0940  | 1.1040  | 1.7960  | 0.2170  | 0.1600  | 118.70 | 106.10 | 100.90 | 7.47  |
| -2.3030 | -1.5920 | 0.2170  | -2.3240 | -2.4200 | 78.48  | 100.30 | 78.69  | 10.40 |
| -0.1660 | 1.3320  | 2.4690  | 0.2900  | -0.0090 | 116.80 | 108.00 | 98.48  | 11.19 |
| -0.8390 | -0.2460 | -0.0490 | -0.3310 | -0.3220 | 90.88  | 99.47  | 92.56  | 12.90 |
| -1.4100 | -0.9090 | -0.4680 | -0.9050 | -0.8870 | 86.02  | 98.23  | 88.90  | 15.79 |
| -1.2050 | -0.5020 | 0.9990  | -1.4320 | -1.4430 | 97.30  | 103.20 | 88.93  | 6.23  |
| 1.4430  | -1.2350 | -2.6420 | 1.4790  | 0.4400  | 91.92  | 91.64  | 120.00 | 1.33  |
| -0.6450 | -0.6410 | -0.4780 | -0.4700 | -0.4830 | 90.40  | 98.02  | 94.43  | 8.23  |
| -2.2670 | -2.6300 | -2.2420 | -2.0920 | -1.7210 | 69.28  | 91.69  | 79.65  | 12.14 |
| -0.1300 | 1.2660  | 2.3410  | 0.3970  | -0.0350 | 109.50 | 106.80 | 98.98  | 15.79 |
| -1.7660 | -1.3660 | -0.3700 | -1.7180 | -1.7430 | 84.26  | 100.50 | 84.25  | 21.96 |
| -0.5290 | -2.0680 | -3.6410 | -0.2970 | 0.4680  | 77.78  | 88.79  | 94.74  | 12.21 |
| -1.0870 | -2.2200 | -0.7190 | -2.4330 | -2.6540 | 80.91  | 98.13  | 86.78  | 1.59  |
| -0.0640 | -0.0020 | -0.2100 | 0.1930  | 0.1730  | 96.94  | 98.85  | 99.45  | 8.66  |
| 0.6800  | 0.9160  | 0.5190  | 0.9380  | 0.8390  | 109.10 | 101.40 | 106.20 | 8.89  |
| -0.3740 | -0.1040 | 0.9310  | -1.2120 | -0.8740 | 106.00 | 103.80 | 95.78  | 2.61  |
| -1.6040 | -3.5690 | -1.8970 | -3.0660 | -3.4010 | 67.78  | 93.59  | 81.82  | 2.32  |
| -1.8340 | -0.8650 | 1.7800  | -3.3460 | -2.5840 | 96.32  | 106.70 | 80.24  | 3.20  |
| -0.4290 | 1.2430  | 2.7220  | -0.3560 | -0.3000 | 124.00 | 109.70 | 95.80  | 7.47  |
| -0.8460 | 0.4870  | 1.5910  | -0.2570 | -0.5630 | 99.67  | 105.10 | 92.79  | 15.52 |
| 3.5190  | 3.0540  | 0.3860  | 3.6430  | 3.6270  | 137.90 | 100.70 | 134.60 | 7.57  |
| -0.7330 | -3.6360 | -5.0750 | -1.0280 | -0.3890 | 61.09  | 81.59  | 92.50  | 5.67  |
| 0.0840  | -1.1120 | -0.9730 | -0.5280 | -0.7570 | 92.57  | 96.82  | 101.00 | 3.07  |
| -1.4780 | 0.1220  | 2.3370  | -1.5060 | -1.5640 | 105.20 | 108.00 | 85.76  | 8.33  |
| -1.0420 | 0.0980  | 0.9770  | -0.4550 | -0.6590 | 94.72  | 103.10 | 91.21  | 16.38 |
| 0.0050  | 0.2290  | 0.5250  | -0.0580 | -0.0970 | 105.50 | 101.70 | 100.10 | 5.63  |
| -3.0550 | -1.9920 | 1.4730  | -3.9110 | -3.8220 | 82.23  | 104.70 | 72.57  | 6.88  |
| -0.8450 | -0.2640 | 1.0070  | -1.2190 | -1.1330 | 101.80 | 103.60 | 91.83  | 5.04  |
| -0.9760 | -0.5560 | 0.8740  | -1.4890 | -1.4140 | 99.19  | 103.30 | 89.84  | 4.98  |
| 0.1180  | 0.2530  | -0.2470 | 0.5130  | 0.6010  | 99.12  | 99.28  | 101.00 | 22.16 |
| -0.7590 | -0.7080 | -0.2420 | -0.7200 | -0.7940 | 89.49  | 98.75  | 92.58  | 7.61  |
| -1.0410 | -0.2100 | 0.6240  | -0.6470 | -0.7630 | 93.30  | 101.50 | 91.59  | 12.21 |
| -0.4420 | 0.4570  | 1.0570  | -0.0090 | -0.1900 | 101.60 | 103.20 | 95.95  | 10.96 |
| -0.4170 | -1.2350 | -0.4900 | -1.2680 | -1.3400 | 91.92  | 98.85  | 95.31  | 2.64  |
| 0.6470  | 2.1130  | 3.1270  | 1.1340  | 0.6360  | 125.00 | 110.30 | 105.30 | 15.16 |
| -0.8530 | 0.0480  | 1.0260  | -0.5540 | -0.7320 | 98.07  | 103.10 | 92.02  | 9.77  |

|         |         |         |         |         |        |        |        |       |
|---------|---------|---------|---------|---------|--------|--------|--------|-------|
| -1.9690 | -1.0070 | 0.1730  | -1.5130 | -1.6040 | 82.96  | 100.30 | 83.18  | 15.46 |
| 2.6810  | -0.9220 | -4.6630 | 2.3820  | 2.6200  | 83.93  | 83.44  | 131.10 | 3.96  |
| 0.6130  | 2.1370  | 2.7360  | 1.0020  | 0.7870  | 127.50 | 108.40 | 105.80 | 10.17 |
| -2.9180 | -2.8690 | -1.6230 | -2.8660 | -2.6710 | 67.44  | 93.91  | 74.42  | 13.68 |
| -0.4600 | -0.1040 | 1.0310  | -1.3250 | -0.9500 | 106.00 | 104.20 | 94.84  | 2.68  |
| -2.3100 | -0.9820 | 0.7820  | -1.0950 | -2.1990 | 85.28  | 102.80 | 82.29  | 26.66 |
| -0.9030 | -0.2640 | 0.7410  | -0.8090 | -0.9410 | 96.00  | 102.10 | 91.27  | 8.16  |
| -2.0090 | -0.8470 | 0.8530  | -1.6190 | -1.8770 | 86.43  | 102.30 | 84.10  | 14.87 |
| 0.9550  | 0.0340  | -1.3020 | 1.0010  | 1.0490  | 96.50  | 95.10  | 109.50 | 6.82  |
| -1.2810 | -3.3700 | -2.3170 | -2.5650 | -2.8460 | 69.89  | 92.55  | 85.82  | 2.84  |
| -2.7200 | -0.2530 | 3.5570  | -2.8720 | -2.9880 | 100.00 | 111.40 | 77.40  | 10.10 |
| 1.5910  | 1.0810  | 0.2060  | 1.3160  | 1.3330  | 125.30 | 101.30 | 120.80 | 2.15  |
| -0.8230 | 1.5420  | 4.0710  | -0.3440 | -0.9010 | 117.50 | 112.30 | 93.44  | 13.95 |
| -2.1820 | -1.7120 | -0.3090 | -2.1550 | -2.1680 | 76.82  | 98.55  | 79.81  | 10.40 |
| 0.6560  | 1.6410  | 1.9300  | 0.3560  | 0.8190  | 131.00 | 107.30 | 107.60 | 3.33  |
| -2.4170 | -1.8160 | -0.2690 | -2.3280 | -2.3570 | 77.83  | 98.71  | 80.30  | 11.45 |
| 1.8770  | 2.7040  | 2.0190  | 2.2570  | 2.0350  | 129.60 | 105.80 | 117.20 | 12.63 |
| -1.1750 | -0.6830 | 0.3070  | -1.0540 | -1.1530 | 91.09  | 100.50 | 89.93  | 8.49  |
| 2.7670  | 2.9360  | 1.8740  | 2.6470  | 2.5780  | 145.70 | 106.20 | 125.30 | 8.89  |
| 1.8620  | -2.2220 | -4.7380 | 1.8640  | 0.9420  | 79.03  | 84.79  | 124.70 | 1.72  |
| -0.2700 | -1.2700 | -1.6420 | -0.3810 | -0.4040 | 85.40  | 94.41  | 97.45  | 5.63  |
| -1.2110 | 0.0250  | 1.1290  | -0.6420 | -0.8780 | 93.95  | 103.60 | 89.68  | 15.62 |
| 2.4600  | -0.4760 | -3.6340 | 2.1930  | 2.2830  | 89.69  | 87.07  | 128.10 | 4.19  |
| -2.9190 | -1.2260 | 2.7200  | -4.1280 | -3.5770 | 92.61  | 110.00 | 70.29  | 5.86  |
| -1.0500 | -0.5410 | -0.2830 | -0.5000 | -0.5130 | 89.81  | 98.90  | 91.79  | 17.23 |
| -1.3120 | -0.4650 | 1.1240  | -1.3940 | -1.4950 | 95.72  | 103.60 | 87.19  | 7.67  |
| -1.8170 | 0.2680  | 2.9610  | -1.3540 | -1.8710 | 99.30  | 109.70 | 84.34  | 14.80 |
| -1.5770 | -0.5530 | 1.8300  | -2.9070 | -2.1790 | 100.20 | 106.90 | 83.06  | 3.27  |
| 0.0540  | -0.2530 | -0.1850 | -0.1420 | -0.1940 | 100.00 | 99.38  | 100.60 | 4.78  |
| -1.5060 | -1.3670 | -1.2630 | -0.9880 | -0.8470 | 82.25  | 95.74  | 88.23  | 17.23 |
| -0.6030 | 1.6370  | 3.8870  | -0.1320 | -0.6470 | 118.70 | 111.70 | 95.19  | 13.59 |
| -0.3690 | -0.3720 | -0.9730 | 0.0740  | 0.2930  | 91.05  | 96.58  | 97.04  | 12.80 |
| 1.5470  | 1.6410  | 0.8810  | 1.3810  | 1.6190  | 131.00 | 103.60 | 119.00 | 2.58  |
| -0.5890 | -1.3400 | -2.5760 | -0.0880 | 0.4330  | 82.63  | 91.30  | 95.33  | 14.41 |
| -1.6260 | -0.1360 | 2.1600  | -1.9420 | -1.8180 | 103.30 | 107.40 | 85.21  | 6.49  |
| 1.5520  | 0.5710  | -0.5110 | 1.2710  | 1.1590  | 114.10 | 98.43  | 118.60 | 3.50  |
| 1.2300  | 0.1750  | -2.8560 | 2.1790  | 2.7610  | 100.50 | 91.60  | 116.30 | 14.31 |
| -0.3690 | 1.2120  | 2.6610  | -0.8810 | -0.2810 | 127.40 | 110.10 | 96.07  | 4.19  |
| 0.8500  | -0.3950 | -1.1550 | 0.5570  | 0.3790  | 100.30 | 96.56  | 110.10 | 3.04  |
| -0.6780 | -2.2200 | -1.2190 | -1.6880 | -2.2560 | 80.91  | 96.41  | 91.63  | 1.33  |
| -0.5400 | 0.4210  | 1.0130  | -0.2740 | -0.3170 | 102.60 | 105.30 | 95.23  | 27.88 |
| 2.3040  | 0.6380  | -1.6790 | 2.1190  | 2.1410  | 105.40 | 93.83  | 124.40 | 5.44  |
| -2.1810 | -1.0310 | 1.2140  | -2.1510 | -2.3480 | 87.68  | 103.30 | 81.85  | 10.00 |
| -0.3340 | -1.3710 | -2.9870 | 0.1760  | 0.7460  | 80.91  | 88.90  | 97.01  | 12.40 |
| -0.6010 | -1.4690 | -1.2030 | -0.9440 | -1.0570 | 83.03  | 95.45  | 93.79  | 5.27  |
| -1.4470 | -2.1440 | -2.1790 | -1.4320 | -1.1520 | 72.50  | 92.05  | 86.12  | 8.53  |
| -0.7020 | -0.9390 | -0.6230 | -0.7490 | -0.8080 | 87.04  | 97.45  | 93.04  | 7.01  |

|         |         |         |         |         |        |        |        |       |
|---------|---------|---------|---------|---------|--------|--------|--------|-------|
| -0.8280 | 0.8070  | 2.5100  | -0.3160 | -0.7790 | 104.80 | 107.30 | 93.45  | 14.87 |
| -2.1940 | -1.1300 | 0.4450  | -1.8600 | -1.9930 | 81.69  | 101.20 | 80.87  | 14.01 |
| -2.1500 | 0.7770  | 4.8480  | -1.8060 | -2.5360 | 103.90 | 116.30 | 83.06  | 22.42 |
| 0.7700  | 0.3690  | -1.0070 | 1.1290  | 1.2820  | 99.39  | 96.42  | 107.30 | 9.18  |
| -2.8090 | -2.0230 | -0.0870 | -2.7860 | -2.8380 | 73.52  | 99.34  | 75.05  | 12.83 |
| -1.1360 | -1.0700 | 0.5810  | -2.0800 | -1.8970 | 94.46  | 102.40 | 87.63  | 3.50  |
| -1.4080 | -0.7630 | 0.3530  | -1.2330 | -1.3470 | 87.62  | 100.80 | 86.78  | 9.64  |
| -0.5700 | -0.3430 | -0.6990 | -0.0680 | 0.0720  | 89.74  | 97.19  | 94.90  | 12.40 |
| -1.8850 | -0.6290 | 1.7090  | -2.1490 | -2.1550 | 95.93  | 105.40 | 83.26  | 7.24  |
| 0.4090  | 0.7500  | 0.5700  | 0.6690  | 0.5690  | 107.90 | 101.30 | 104.00 | 7.87  |
| -0.1110 | 0.2940  | 0.0700  | 0.3390  | 0.3580  | 97.96  | 99.82  | 99.11  | 13.16 |
| -0.5450 | -0.2720 | -0.1890 | -0.2230 | -0.2430 | 91.93  | 98.92  | 94.88  | 9.64  |
| -0.7080 | 0.6650  | 1.8380  | -0.1610 | -0.4830 | 103.10 | 105.90 | 93.79  | 13.68 |
| -1.1460 | 1.5290  | 4.9160  | -0.6150 | -1.4950 | 114.40 | 114.70 | 91.09  | 18.74 |
| -1.5130 | 0.3050  | 2.7390  | -1.9910 | -1.6350 | 110.30 | 109.60 | 85.76  | 5.63  |
| 0.6310  | -0.1070 | -0.9960 | 0.7010  | 0.6400  | 98.34  | 96.43  | 106.50 | 5.63  |
| -0.2160 | 0.2370  | 0.8940  | -0.3180 | -0.3580 | 106.70 | 103.00 | 97.82  | 6.16  |
| -0.0420 | -0.1110 | -0.6640 | 0.2800  | 0.3800  | 94.32  | 97.49  | 99.65  | 9.77  |
| 0.2120  | -0.3580 | -0.3690 | -0.1020 | -0.2070 | 99.19  | 98.62  | 102.40 | 4.55  |
| 2.0410  | 1.2960  | -0.1960 | 1.9500  | 1.9200  | 123.70 | 99.83  | 124.50 | 2.84  |
| 0.6280  | 1.6170  | 1.7510  | 1.0710  | 0.8480  | 115.50 | 104.90 | 105.80 | 12.14 |
| -4.1250 | -3.0980 | -0.0370 | -4.2110 | -4.4160 | 66.13  | 99.67  | 66.65  | 19.89 |
| -0.7560 | -0.6090 | -1.0370 | -0.1700 | 0.0070  | 87.76  | 96.01  | 93.52  | 15.16 |
| 0.3610  | 1.3410  | 1.9740  | -0.0930 | 0.3790  | 129.50 | 107.60 | 104.30 | 3.53  |
| 1.8810  | -2.1010 | -4.2780 | 2.1430  | 0.6890  | 82.33  | 86.35  | 126.80 | 1.07  |
| 0.7010  | 2.2510  | 2.9530  | 0.8610  | 0.9050  | 140.50 | 110.50 | 106.70 | 7.84  |
| -0.3820 | -0.5440 | -0.6400 | -0.2440 | -0.2580 | 89.96  | 97.38  | 96.29  | 7.90  |
| -0.2020 | -0.4740 | 0.2480  | -0.8750 | -0.8410 | 101.90 | 101.30 | 97.77  | 3.20  |
| -0.5950 | -0.6380 | -0.9590 | -0.1900 | -0.0650 | 91.55  | 98.37  | 94.64  | 19.99 |
| 0.8790  | 1.2120  | 1.1880  | 0.4710  | 0.7730  | 127.40 | 104.80 | 111.00 | 2.87  |
| -2.5360 | 0.8530  | 5.9600  | -2.1970 | -3.1360 | 109.10 | 118.20 | 80.22  | 17.86 |
| -2.0380 | -1.6230 | -0.3700 | -1.0980 | -2.1550 | 81.83  | 100.50 | 81.82  | 21.96 |
| -0.6480 | -0.7160 | -1.0240 | -0.2480 | -0.1180 | 90.74  | 98.14  | 94.15  | 19.79 |
| 0.6550  | 1.1830  | 0.8410  | 1.0990  | 0.9820  | 109.30 | 102.50 | 105.50 | 12.73 |
| 0.2750  | 0.7220  | 0.2850  | 0.7580  | 0.7830  | 106.90 | 102.80 | 103.10 | 25.02 |
| -1.2070 | -0.1400 | 0.9940  | -0.7460 | -0.9600 | 93.59  | 102.70 | 90.40  | 14.05 |
| -1.3830 | -1.2200 | -0.3500 | -1.3720 | -1.4210 | 82.95  | 98.37  | 86.69  | 8.39  |
| -1.6330 | -2.2580 | -2.2380 | -1.5990 | -1.3020 | 73.95  | 92.57  | 86.04  | 8.66  |
| -3.1220 | -2.5230 | 1.3690  | -4.9810 | -4.4510 | 78.55  | 105.10 | 68.35  | 4.16  |
| 4.2580  | 1.3680  | -2.9870 | 3.7540  | 4.4340  | 113.50 | 88.90  | 136.00 | 12.40 |
| 1.6840  | 2.5420  | 2.6300  | 1.9500  | 1.5730  | 132.00 | 108.60 | 114.00 | 14.11 |
| -0.1390 | 1.1420  | 2.0950  | 0.1780  | -0.0050 | 116.50 | 106.90 | 98.69  | 9.25  |
| -1.3530 | 0.1640  | 1.7270  | -1.1540 | -1.2760 | 98.07  | 106.30 | 89.85  | 30.41 |
| -2.9460 | -0.8290 | 3.1840  | -3.6360 | -3.4060 | 95.88  | 111.30 | 71.54  | 8.16  |
| -1.8790 | -1.6890 | 0.8810  | -3.6710 | -3.1000 | 86.69  | 103.60 | 78.75  | 2.58  |
| -2.5160 | -1.4250 | 1.4730  | -3.1350 | -3.0830 | 87.71  | 104.70 | 77.41  | 6.88  |
| 0.2820  | 1.2250  | 1.6840  | 0.5080  | 0.3650  | 110.40 | 105.80 | 102.30 | 28.76 |

|         |         |         |         |         |        |        |        |       |
|---------|---------|---------|---------|---------|--------|--------|--------|-------|
| -0.6730 | -0.7300 | -1.1560 | -0.1830 | -0.0550 | 89.01  | 97.06  | 93.71  | 19.27 |
| -0.8230 | 1.1870  | 3.3440  | -0.3440 | -0.8600 | 111.60 | 109.90 | 93.44  | 13.95 |
| -0.4290 | -0.1540 | 0.3090  | -0.3560 | -0.4610 | 97.30  | 100.60 | 95.80  | 7.47  |
| 0.5920  | 2.1540  | 2.6890  | 0.8250  | 0.8480  | 133.20 | 109.10 | 105.90 | 7.24  |
| -1.4780 | 0.6150  | 3.0590  | -1.4190 | -1.7910 | 105.10 | 113.20 | 87.01  | 36.78 |
| -0.5530 | -0.9330 | -1.3510 | -0.3350 | -0.1860 | 86.20  | 95.35  | 95.26  | 8.59  |
| -1.2940 | -0.2690 | 0.7890  | -0.7790 | -0.9990 | 92.00  | 102.10 | 89.81  | 15.79 |
| -1.1250 | -0.2720 | 0.6220  | -0.7490 | -0.8800 | 91.93  | 101.70 | 89.73  | 11.19 |
| -1.7070 | -1.3030 | -0.9000 | -1.1770 | -1.0920 | 81.32  | 96.53  | 85.77  | 17.33 |
| -3.9690 | -0.9390 | 4.7450  | -4.0670 | -4.6420 | 87.04  | 115.80 | 66.92  | 17.33 |
| 3.3450  | 1.4230  | -1.7390 | 3.0890  | 3.3700  | 115.10 | 93.45  | 127.20 | 17.33 |
| -1.9530 | -0.2350 | 2.4720  | -2.1100 | -2.1490 | 100.70 | 108.50 | 81.27  | 8.53  |
| 0.7640  | 0.8220  | 0.1460  | 1.0430  | 0.9940  | 106.30 | 100.10 | 106.90 | 9.25  |
| -0.2040 | 0.8010  | 1.6150  | -0.0940 | -0.1520 | 112.40 | 105.10 | 98.18  | 7.08  |
| -1.6780 | -0.6480 | 1.7120  | -2.5850 | -2.2040 | 98.61  | 106.20 | 83.31  | 4.48  |
| -0.9630 | -0.7300 | -0.6910 | -0.5530 | -0.4890 | 89.01  | 98.83  | 91.16  | 20.81 |
| -0.5140 | 0.6470  | 1.5680  | -0.0230 | -0.3040 | 102.40 | 104.40 | 95.91  | 14.14 |
| 0.9120  | -1.1860 | -1.9190 | 0.9070  | -0.1580 | 92.47  | 94.00  | 113.10 | 0.97  |
| -1.4780 | -0.3460 | 1.5210  | -1.5060 | -1.6280 | 97.11  | 105.00 | 85.76  | 8.33  |
| 1.9880  | 3.0100  | 3.4580  | 2.1800  | 1.6650  | 140.20 | 111.40 | 116.30 | 15.92 |
| 0.0410  | 0.8400  | 1.4390  | -0.0220 | 0.0310  | 115.30 | 105.00 | 100.40 | 5.57  |
| -0.2330 | -0.2590 | -0.7950 | 0.2110  | 0.3370  | 95.61  | 98.96  | 97.91  | 20.52 |
| -1.6020 | -1.5690 | -1.4820 | -1.0990 | -0.9430 | 80.58  | 95.02  | 87.53  | 18.25 |
| 0.4150  | 0.7460  | 0.7710  | 0.5050  | 0.4160  | 111.00 | 102.40 | 104.10 | 7.15  |
| 1.5820  | 1.1240  | -0.3780 | 1.7660  | 1.8650  | 109.90 | 98.44  | 112.80 | 19.79 |
| 0.2880  | -0.3230 | -1.5560 | 0.5690  | 0.7900  | 90.22  | 94.21  | 102.60 | 8.89  |
| -1.1170 | -0.9220 | -0.7400 | -0.7950 | -0.7020 | 83.93  | 97.04  | 89.68  | 10.46 |
| -2.3610 | -1.3620 | 0.5240  | -1.2270 | -2.3630 | 80.07  | 101.40 | 78.78  | 12.07 |
| 0.2040  | 0.5420  | 0.5240  | 0.4320  | 0.3310  | 105.50 | 101.20 | 102.00 | 7.80  |
| 2.0940  | 2.5580  | 1.9740  | 2.1290  | 1.9600  | 127.90 | 106.70 | 117.10 | 28.50 |
| -1.1510 | -0.7230 | -0.4680 | -0.7250 | -0.6510 | 85.78  | 98.01  | 89.64  | 11.98 |
| -0.2760 | -0.1290 | -0.0100 | -0.0830 | -0.1510 | 96.78  | 99.48  | 97.60  | 8.00  |
| -0.0990 | 0.6050  | 0.7550  | 0.3840  | 0.2520  | 102.00 | 102.30 | 99.24  | 20.09 |
| -1.1600 | 0.2680  | 1.8020  | -0.7110 | -1.0130 | 99.30  | 105.80 | 89.63  | 12.40 |
| -2.6310 | -0.5560 | 3.0910  | -3.2020 | -2.9980 | 99.19  | 111.00 | 74.51  | 8.03  |
| 0.8020  | 1.0920  | 1.1040  | 0.5000  | 0.6550  | 124.10 | 104.30 | 109.30 | 3.99  |
| 1.0480  | 0.4750  | 0.0110  | 0.6790  | 0.6330  | 114.80 | 100.40 | 113.00 | 3.01  |
| -1.8200 | 0.0490  | 2.3290  | -1.3060 | -1.7670 | 94.42  | 107.70 | 84.83  | 17.33 |
| 2.4660  | 1.2730  | -1.9140 | 2.7640  | 3.2350  | 109.90 | 93.56  | 122.40 | 13.16 |
| 0.5420  | -0.8290 | -1.1580 | 0.0540  | -0.2280 | 95.88  | 96.17  | 106.70 | 2.91  |
| -0.2120 | -0.4010 | 0.3810  | -1.0190 | -0.8770 | 102.10 | 101.90 | 97.55  | 2.25  |
| -0.7570 | -1.0850 | -0.3750 | -1.0940 | -1.1920 | 88.79  | 98.43  | 92.22  | 5.50  |
| 0.7350  | 0.9350  | 0.8310  | 0.5130  | 0.6350  | 118.70 | 103.30 | 108.40 | 3.66  |
| -2.6890 | -0.7230 | 2.6850  | -2.7380 | -3.0330 | 90.81  | 108.80 | 75.63  | 11.58 |
| 2.2600  | -0.3310 | -2.2700 | 2.1910  | 1.3450  | 103.70 | 92.36  | 130.50 | 1.36  |
| 0.8440  | 1.0920  | 1.0560  | 0.5410  | 0.6900  | 124.10 | 104.10 | 109.80 | 3.96  |
| -2.0230 | -1.8090 | -0.1150 | -2.3400 | -2.4170 | 78.46  | 99.19  | 80.31  | 7.84  |

|         |         |         |         |         |        |        |        |       |
|---------|---------|---------|---------|---------|--------|--------|--------|-------|
| -1.6140 | -0.2640 | 1.9680  | -1.9840 | -1.8520 | 101.80 | 106.80 | 85.17  | 6.23  |
| 4.0730  | -0.3950 | -4.5180 | 4.7890  | 3.2450  | 100.30 | 85.57  | 158.80 | 0.94  |
| -1.8950 | -3.4630 | -1.5870 | -3.3070 | -3.4690 | 67.63  | 94.41  | 79.22  | 3.30  |
| 0.6950  | -1.8810 | -2.4610 | 0.3760  | -0.6260 | 85.20  | 91.69  | 109.40 | 1.23  |
| -2.2780 | -1.9310 | -0.6900 | -2.2160 | -2.1680 | 76.85  | 97.39  | 81.23  | 10.66 |
| -2.0840 | -1.0600 | 0.2020  | -1.6210 | -1.7270 | 83.14  | 100.50 | 82.90  | 18.58 |
| -1.6660 | -1.4430 | -0.3440 | -1.6690 | -1.7080 | 82.78  | 98.44  | 85.69  | 8.43  |
| -1.3040 | -1.8070 | -1.3250 | -1.4370 | -1.4190 | 79.51  | 95.39  | 88.30  | 6.88  |
| 0.8940  | 2.3340  | 2.9230  | 1.1590  | 1.0370  | 138.30 | 110.00 | 108.10 | 9.25  |
| 0.9440  | 0.2940  | -0.9620 | 1.1540  | 1.1420  | 101.30 | 96.53  | 109.50 | 6.55  |
| -0.6830 | -0.4010 | 0.9310  | -1.6750 | -1.2970 | 102.10 | 103.80 | 92.30  | 2.61  |
| 1.4220  | 0.1740  | -0.9300 | 1.2370  | 0.9790  | 108.60 | 97.37  | 117.80 | 2.35  |
| -2.7200 | -0.0930 | 3.8150  | -3.3960 | -2.9410 | 105.30 | 113.20 | 75.69  | 7.01  |
| -0.7130 | 0.1100  | 1.2360  | -0.7560 | -0.7920 | 104.20 | 103.90 | 93.52  | 6.55  |



| Stunting | filter_5 | Wasting | Underweig | Breastfeed | Interval | Interval2 | Agemother | House |
|----------|----------|---------|-----------|------------|----------|-----------|-----------|-------|
| 0.00     | 0        | 1.00    | 1.00      | 2.00       | 47.00    | 1.00      | 2.00      | 1.00  |
| 0.00     | 0        | 1.00    | 1.00      | 2.00       | 31.00    | 1.00      | 2.00      | 0.00  |
| 0.00     | 1        | 1.00    | 1.00      | 1.00       | 8.00     | 0.00      | 2.00      | 1.00  |
| 0.00     | 1        | 1.00    | 1.00      | 1.00       | 15.00    | 0.00      | 2.00      | 0.00  |
| 0.00     | 0        | 1.00    | 1.00      | 1.00       | 61.00    | 1.00      | 2.00      | 1.00  |
| 0.00     | 0        | 1.00    | 1.00      | 1.00       | 46.00    | 1.00      | 2.00      | 2.00  |
| 0.00     | 1        | 1.00    | 1.00      | 1.00       | 8.00     | 0.00      | 2.00      | 2.00  |
| 0.00     | 1        | 1.00    | 1.00      | 1.00       | 10.00    | 0.00      | 3.00      | 2.00  |
| 0.00     | 0        | 1.00    | 1.00      | 1.00       | 72.00    | 1.00      | 2.00      | 0.00  |
| 0.00     | 0        | 1.00    | 1.00      | 1.00       | 15.00    | 0.00      | 2.00      | 1.00  |
| 0.00     | 1        | 1.00    | 1.00      | 1.00       | 16.00    | 0.00      | 2.00      | 0.00  |
| 0.00     | 0        | 1.00    | 1.00      | 1.00       | 38.00    | 1.00      | 1.00      | 1.00  |
| 0.00     | 1        | 1.00    | 1.00      | 1.00       | 19.00    | 0.00      | 1.00      | 1.00  |
| 0.00     | 0        | 1.00    | 2.00      | 1.00       | 15.00    | 0.00      | 2.00      | 2.00  |
| 1.00     | 0        | 1.00    | 2.00      | 1.00       | 95.00    | 1.00      | 2.00      | 0.00  |
| 0.00     | 1        | 1.00    | 1.00      | 1.00       | 16.00    | 0.00      | 2.00      | 0.00  |
| 0.00     | 0        | 1.00    | 1.00      | 1.00       | 37.00    | 1.00      | 1.00      | 0.00  |
| 1.00     | 1        | 1.00    | 2.00      | 1.00       | 12.00    | 0.00      | 1.00      | 2.00  |
| 0.00     | 1        | 1.00    | 1.00      | 1.00       | 21.00    | 0.00      | 3.00      | 1.00  |
| 0.00     | 0        | 1.00    | 1.00      | 1.00       | 84.00    | 1.00      | 2.00      | 2.00  |
| 0.00     | 0        | 1.00    | 1.00      | 2.00       | 76.00    | 1.00      | 1.00      | 1.00  |
| 0.00     | 1        | 1.00    | 1.00      | 1.00       | 14.00    | 0.00      | 1.00      | 1.00  |
| 0.00     | 0        | 1.00    | 1.00      | 2.00       | 64.00    | 1.00      | 3.00      | 1.00  |
| 0.00     | 1        | 2.00    | 1.00      | 1.00       | 10.00    | 0.00      | 3.00      | 2.00  |
| 1.00     | 1        | 1.00    | 1.00      | 1.00       | 53.00    | 1.00      | 2.00      | 2.00  |
| 1.00     | 0        | 1.00    | 1.00      | 2.00       | 80.00    | 1.00      | 2.00      | 1.00  |
| 0.00     | 0        | 1.00    | 1.00      | 1.00       | 44.00    | 1.00      | 3.00      | 0.00  |
| 0.00     | 1        | 1.00    | 1.00      | 1.00       | 15.00    | 0.00      | 2.00      | 1.00  |
| 0.00     | 0        | 1.00    | 1.00      | 2.00       | 83.00    | 1.00      | 2.00      | 1.00  |
| 0.00     | 0        | 1.00    | 1.00      | 1.00       | 12.00    | 0.00      | 2.00      | 2.00  |
| 0.00     | 1        | 1.00    | 1.00      | 1.00       | 13.00    | 0.00      | 1.00      | 1.00  |
| 0.00     | 1        | 1.00    | 1.00      | 1.00       | 17.00    | 0.00      | 2.00      | 1.00  |
| 0.00     | 0        | 1.00    | 1.00      | 2.00       | 61.00    | 1.00      | 2.00      | 2.00  |
| 1.00     | 0        | 1.00    | 1.00      | 2.00       | 28.00    | 1.00      | 2.00      | 1.00  |
| 0.00     | 1        | 1.00    | 1.00      | 1.00       | 12.00    | 0.00      | 3.00      | 1.00  |
| 0.00     | 1        | 1.00    | 1.00      | 1.00       | 13.00    | 0.00      | 2.00      | 1.00  |
| 1.00     | 0        | 1.00    | 1.00      | 2.00       | 25.00    | 1.00      | 2.00      | 1.00  |
| 0.00     | 1        | 1.00    | 1.00      | 1.00       | 21.00    | 0.00      | 1.00      | 2.00  |
| 0.00     | 1        | 1.00    | 2.00      | 1.00       | 10.00    | 0.00      | 1.00      | 1.00  |
| 0.00     | 1        | 1.00    | 1.00      | 1.00       | 13.00    | 0.00      | 3.00      | 1.00  |
| 0.00     | 0        | 1.00    | 1.00      | 2.00       | 47.00    | 1.00      | 2.00      | 1.00  |
| 0.00     | 1        | 1.00    | 1.00      | 1.00       | 7.00     | 0.00      | 2.00      | 1.00  |
| 0.00     | 1        | 1.00    | 1.00      | 1.00       | 30.00    | 1.00      | 2.00      | 1.00  |
| 1.00     | 0        | 1.00    | 1.00      | 1.00       | 49.00    | 1.00      | 3.00      | 1.00  |
| 0.00     | 0        | 1.00    | 1.00      | 2.00       | 40.00    | 1.00      | 2.00      | 1.00  |
| 0.00     | 0        | 1.00    | 1.00      | 1.00       | 35.00    | 1.00      | 3.00      | 2.00  |

|      |   |      |      |      |       |      |      |      |
|------|---|------|------|------|-------|------|------|------|
| 1.00 | 0 | 1.00 | 1.00 | 2.00 | 21.00 | 0.00 | 2.00 | 1.00 |
| 0.00 | 1 | 1.00 | 1.00 | 1.00 | 15.00 | 0.00 | 1.00 | 0.00 |
| 0.00 | 0 | 2.00 | 2.00 | 1.00 | 51.00 | 1.00 | 2.00 | 0.00 |
| 0.00 | 0 | 1.00 | 1.00 | 1.00 | 66.00 | 1.00 | 1.00 | 0.00 |
| 0.00 | 1 | 2.00 | 1.00 | 1.00 | 15.00 | 0.00 | 2.00 | 1.00 |
| 0.00 | 0 | 1.00 | 1.00 | 1.00 | 60.00 | 1.00 | 1.00 | 2.00 |
| 1.00 | 1 | 1.00 | 1.00 | 1.00 | 12.00 | 0.00 | 3.00 | 2.00 |
| 0.00 | 1 | 1.00 | 1.00 | 1.00 | 12.00 | 0.00 | 1.00 | 0.00 |
| 0.00 | 0 | 1.00 | 1.00 | 2.00 | 48.00 | 1.00 | 1.00 | 0.00 |
| 0.00 | 1 | 1.00 | 1.00 | 1.00 | 19.00 | 0.00 | 3.00 | 0.00 |
| 0.00 | 1 | 1.00 | 1.00 | 1.00 | 13.00 | 0.00 | 1.00 | 1.00 |
| 1.00 | 1 | 1.00 | 1.00 | 1.00 | 10.00 | 0.00 | 1.00 | 1.00 |
| 0.00 | 0 | 2.00 | 1.00 | 2.00 | 46.00 | 1.00 | 3.00 | 1.00 |
| 0.00 | 0 | 1.00 | 1.00 | 2.00 | 29.00 | 1.00 | 1.00 | 2.00 |
| 0.00 | 1 | 1.00 | 1.00 | 1.00 | 15.00 | 0.00 | 1.00 | 1.00 |
| 1.00 | 0 | 1.00 | 1.00 | 2.00 | 29.00 | 1.00 | 3.00 | 1.00 |
| 0.00 | 1 | 1.00 | 1.00 | 1.00 | 18.00 | 0.00 | 1.00 | 1.00 |
| 1.00 | 0 | 1.00 | 1.00 | 1.00 | 23.00 | 0.00 | 2.00 | 0.00 |
| 0.00 | 0 | 1.00 | 1.00 | 2.00 | 45.00 | 1.00 | 2.00 | 0.00 |
| 0.00 | 1 | 2.00 | 1.00 | 1.00 | 16.00 | 0.00 | 3.00 | 0.00 |
| 0.00 | 0 | 2.00 | 1.00 | 2.00 | 30.00 | 1.00 | 3.00 | 0.00 |
| 0.00 | 0 | 1.00 | 1.00 | 1.00 | 30.00 | 1.00 | 3.00 | 1.00 |
| 0.00 | 1 | 1.00 | 1.00 | 1.00 | 13.00 | 0.00 | 1.00 | 0.00 |
| 0.00 | 0 | 2.00 | 1.00 | 1.00 | 35.00 | 1.00 | 2.00 | 1.00 |
| 0.00 | 1 | 1.00 | 1.00 | 1.00 | 8.00  | 0.00 | 2.00 | 0.00 |
| 0.00 | 1 | 1.00 | 1.00 | 1.00 | 16.00 | 0.00 | 3.00 | 0.00 |
| 0.00 | 0 | 1.00 | 1.00 | 1.00 | 27.00 | 1.00 | 2.00 | 2.00 |
| 0.00 | 1 | 2.00 | 1.00 | 1.00 | 20.00 | 0.00 | 1.00 | 0.00 |
| 0.00 | 1 | 1.00 | 1.00 | 1.00 | 20.00 | 0.00 | 1.00 | 0.00 |
| 0.00 | 1 | 1.00 | 1.00 | 1.00 | 33.00 | 1.00 | 3.00 | 1.00 |
| 0.00 | 1 | 1.00 | 1.00 | 1.00 | 15.00 | 0.00 | 2.00 | 0.00 |
| 0.00 | 0 | 1.00 | 1.00 | 2.00 | 18.00 | 0.00 | 3.00 | 1.00 |
| 0.00 | 1 | 2.00 | 1.00 | 1.00 | 18.00 | 0.00 | 2.00 | 1.00 |
| 0.00 | 0 | 1.00 | 1.00 | 2.00 | 57.00 | 1.00 | 3.00 | 1.00 |
| 0.00 | 0 | 1.00 | 1.00 | 2.00 | 55.00 | 1.00 | 3.00 | 0.00 |
| 0.00 | 1 | 1.00 | 1.00 | 1.00 | 9.00  | 0.00 | 3.00 | 2.00 |
| 0.00 | 0 | 1.00 | 1.00 | 1.00 | 10.00 | 0.00 | 3.00 | 1.00 |
| 1.00 | 0 | 1.00 | 1.00 | 1.00 | 46.00 | 1.00 | 2.00 | 2.00 |
| 0.00 | 1 | 1.00 | 1.00 | 1.00 | 16.00 | 0.00 | 3.00 | 0.00 |
| 1.00 | 0 | 1.00 | 1.00 | 1.00 | 25.00 | 1.00 | 2.00 | 0.00 |
| 1.00 | 0 | 1.00 | 2.00 | 1.00 | 36.00 | 1.00 | 2.00 | 0.00 |
| 1.00 | 1 | 1.00 | 2.00 | 1.00 | 10.00 | 0.00 | 2.00 | 0.00 |
| 0.00 | 0 | 1.00 | 1.00 | 1.00 | 33.00 | 1.00 | 2.00 | 0.00 |
| 0.00 | 1 | 2.00 | 1.00 | 1.00 | 10.00 | 0.00 | 1.00 | 0.00 |
| 0.00 | 0 | 1.00 | 1.00 | 1.00 | 61.00 | 1.00 | 2.00 | 0.00 |
| 0.00 | 0 | 2.00 | 1.00 | 2.00 | 21.00 | 0.00 | 2.00 | 0.00 |
| 0.00 | 1 | 2.00 | 1.00 | 1.00 | 18.00 | 0.00 | 3.00 | 0.00 |

|      |   |      |      |      |       |      |      |      |
|------|---|------|------|------|-------|------|------|------|
| 0.00 | 1 | 2.00 | 2.00 | 1.00 | 34.00 | 1.00 | 3.00 | 0.00 |
| 0.00 | 1 | 1.00 | 1.00 | 1.00 | 14.00 | 0.00 | 2.00 | 0.00 |
| 0.00 | 0 | 2.00 | 2.00 | 2.00 | 43.00 | 1.00 | 1.00 | 0.00 |
| 0.00 | 1 | 1.00 | 1.00 | 1.00 | 16.00 | 0.00 | 2.00 | 1.00 |
| 1.00 | 0 | 1.00 | 1.00 | 1.00 | 31.00 | 1.00 | 2.00 | 1.00 |
| 0.00 | 1 | 1.00 | 1.00 | 1.00 | 17.00 | 0.00 | 2.00 | 1.00 |
| 0.00 | 0 | 1.00 | 1.00 | 2.00 | 48.00 | 1.00 | 2.00 | 1.00 |
| 0.00 | 1 | 1.00 | 1.00 | 1.00 | 15.00 | 0.00 | 1.00 | 1.00 |
| 1.00 | 0 | 1.00 | 1.00 | 1.00 | 57.00 | 1.00 | 2.00 | 0.00 |
| 0.00 | 0 | 2.00 | 1.00 | 1.00 | 11.00 | 0.00 | 2.00 | 0.00 |
| 0.00 | 0 | 1.00 | 1.00 | 2.00 | 39.00 | 1.00 | 1.00 | 1.00 |
| 0.00 | 1 | 1.00 | 1.00 | 1.00 | 17.00 | 0.00 | 3.00 | 1.00 |
| 0.00 | 0 | 2.00 | 1.00 | 2.00 | 53.00 | 1.00 | 3.00 | 0.00 |
| 0.00 | 0 | 1.00 | 1.00 | 2.00 | 38.00 | 1.00 | 3.00 | 0.00 |
| 0.00 | 0 | 1.00 | 1.00 | 2.00 | 48.00 | 1.00 | 2.00 | 1.00 |
| 0.00 | 1 | 1.00 | 1.00 | 1.00 | 15.00 | 0.00 | 2.00 | 1.00 |
| 0.00 | 1 | 1.00 | 1.00 | 1.00 | 20.00 | 0.00 | 3.00 | 1.00 |
| 0.00 | 1 | 1.00 | 1.00 | 1.00 | 18.00 | 0.00 | 3.00 | 1.00 |
| 0.00 | 0 | 2.00 | 1.00 | 1.00 | 44.00 | 1.00 | 1.00 | 1.00 |
| 0.00 | 1 | 1.00 | 1.00 | 1.00 | 15.00 | 0.00 | 1.00 | 0.00 |
| 1.00 | 0 | 1.00 | 1.00 | 1.00 | 18.00 | 0.00 | 1.00 | 1.00 |
| 1.00 | 0 | 1.00 | 1.00 | 1.00 | 38.00 | 1.00 | 1.00 | 1.00 |
| 0.00 | 1 | 2.00 | 1.00 | 1.00 | 19.00 | 0.00 | 3.00 | 1.00 |
| 0.00 | 0 | 1.00 | 1.00 | 2.00 | 36.00 | 1.00 | 2.00 | 0.00 |
| 0.00 | 0 | 1.00 | 1.00 | 2.00 | 42.00 | 1.00 | 2.00 | 0.00 |
| 0.00 | 1 | 1.00 | 1.00 | 1.00 | 19.00 | 0.00 | 3.00 | 1.00 |
| 0.00 | 1 | 2.00 | 1.00 | 1.00 | 29.00 | 1.00 | 1.00 | 0.00 |
| 0.00 | 0 | 1.00 | 1.00 | 2.00 | 25.00 | 1.00 | 3.00 | 0.00 |
| 0.00 | 1 | 1.00 | 1.00 | 1.00 | 18.00 | 0.00 | 2.00 | 0.00 |
| 1.00 | 0 | 1.00 | 1.00 | 1.00 | 41.00 | 1.00 | 1.00 | 0.00 |
| 0.00 | 1 | 1.00 | 1.00 | 1.00 | 16.00 | 0.00 | 2.00 | 1.00 |
| 0.00 | 1 | 1.00 | 1.00 | 1.00 | 20.00 | 0.00 | 2.00 | 1.00 |
| 0.00 | 0 | 1.00 | 1.00 | 2.00 | 38.00 | 1.00 | 2.00 | 1.00 |
| 0.00 | 1 | 1.00 | 1.00 | 1.00 | 19.00 | 0.00 | 2.00 | 1.00 |
| 1.00 | 0 | 1.00 | 1.00 | 1.00 | 68.00 | 1.00 | 2.00 | 0.00 |
| 0.00 | 0 | 2.00 | 1.00 | 2.00 | 15.00 | 0.00 | 1.00 | 0.00 |
| 0.00 | 1 | 1.00 | 1.00 | 1.00 | 21.00 | 0.00 | 1.00 | 0.00 |
| 0.00 | 0 | 1.00 | 1.00 | 1.00 | 40.00 | 1.00 | 3.00 | 0.00 |
| 0.00 | 1 | 1.00 | 1.00 | 1.00 | 13.00 | 0.00 | 2.00 | 2.00 |
| 0.00 | 0 | 2.00 | 1.00 | 1.00 | 32.00 | 1.00 | 2.00 | 0.00 |
| 0.00 | 1 | 1.00 | 1.00 | 1.00 | 16.00 | 0.00 | 2.00 | 2.00 |
| 0.00 | 0 | 1.00 | 1.00 | 1.00 | 38.00 | 1.00 | 2.00 | 1.00 |
| 0.00 | 1 | 1.00 | 1.00 | 1.00 | 21.00 | 0.00 | 2.00 | 2.00 |
| 0.00 | 1 | 1.00 | 1.00 | 1.00 | 12.00 | 0.00 | 2.00 | 2.00 |
| 0.00 | 0 | 1.00 | 1.00 | 1.00 | 32.00 | 1.00 | 1.00 | 2.00 |
| 0.00 | 1 | 1.00 | 1.00 | 1.00 | 15.00 | 0.00 | 2.00 | 0.00 |
| 0.00 | 1 | 2.00 | 2.00 | 1.00 | 12.00 | 0.00 | 2.00 | 0.00 |

|      |   |      |      |      |       |      |      |      |
|------|---|------|------|------|-------|------|------|------|
| 1.00 | 0 | 1.00 | 1.00 | 1.00 | 61.00 | 1.00 | 2.00 | 0.00 |
| 0.00 | 1 | 2.00 | 1.00 | 1.00 | 15.00 | 0.00 | 2.00 | 1.00 |
| 0.00 | 0 | 1.00 | 1.00 | 2.00 | 26.00 | 1.00 | 2.00 | 1.00 |
| 0.00 | 1 | 1.00 | 1.00 | 1.00 | 32.00 | 1.00 | 1.00 | 2.00 |
| 0.00 | 1 | 1.00 | 1.00 | 1.00 | 46.00 | 1.00 | 2.00 | 2.00 |
| 0.00 | 1 | 2.00 | 1.00 | 1.00 | 15.00 | 0.00 | 2.00 | 2.00 |
| 0.00 | 1 | 1.00 | 1.00 | 1.00 | 19.00 | 0.00 | 3.00 | 2.00 |
| 0.00 | 1 | 1.00 | 1.00 | 1.00 | 41.00 | 1.00 | 1.00 | 2.00 |
| 0.00 | 1 | 1.00 | 1.00 | 1.00 | 15.00 | 0.00 | 2.00 | 2.00 |
| 0.00 | 0 | 1.00 | 1.00 | 1.00 | 21.00 | 1.00 | 2.00 | 2.00 |
| 0.00 | 1 | 2.00 | 1.00 | 1.00 | 19.00 | 0.00 | 3.00 | 2.00 |
| 0.00 | 0 | 1.00 | 1.00 | 1.00 | 46.00 | 1.00 | 2.00 | 2.00 |
| 0.00 | 1 | 1.00 | 1.00 | 1.00 | 29.00 | 1.00 | 2.00 | 2.00 |
| 0.00 | 1 | 1.00 | 1.00 | 1.00 | 14.00 | 0.00 | 2.00 | 1.00 |
| 0.00 | 0 | 1.00 | 1.00 | 2.00 | 49.00 | 1.00 | 3.00 | 1.00 |
| 0.00 | 0 | 1.00 | 1.00 | 1.00 | 14.00 | 0.00 | 2.00 | 1.00 |
| 0.00 | 0 | 1.00 | 2.00 | 2.00 | 12.00 | 0.00 | 3.00 | 1.00 |
| 0.00 | 1 | 1.00 | 1.00 | 1.00 | 13.00 | 0.00 | 3.00 | 1.00 |
| 0.00 | 1 | 2.00 | 2.00 | 1.00 | 79.00 | 1.00 | 2.00 | 1.00 |
| 0.00 | 1 | 1.00 | 1.00 | 1.00 | 16.00 | 0.00 | 3.00 | 1.00 |
| 0.00 | 0 | 1.00 | 1.00 | 1.00 | 32.00 | 1.00 | 2.00 | 1.00 |
| 1.00 | 1 | 1.00 | 1.00 | 1.00 | 15.00 | 0.00 | 2.00 | 1.00 |
| 0.00 | 1 | 1.00 | 1.00 | 1.00 | 16.00 | 0.00 | 3.00 | 1.00 |
| 1.00 | 0 | 1.00 | 2.00 | 2.00 | 37.00 | 1.00 | 1.00 | 1.00 |
| 0.00 | 0 | 1.00 | 1.00 | 2.00 | 48.00 | 1.00 | 3.00 | 2.00 |
| 0.00 | 1 | 1.00 | 1.00 | 1.00 | 15.00 | 0.00 | 1.00 | 1.00 |
| 0.00 | 0 | 1.00 | 1.00 | 2.00 | 70.00 | 1.00 | 3.00 | 1.00 |
| 1.00 | 1 | 1.00 | 1.00 | 1.00 | 15.00 | 0.00 | 1.00 | 1.00 |
| 0.00 | 0 | 1.00 | 1.00 | 1.00 | 45.00 | 1.00 | 1.00 | 1.00 |
| 0.00 | 1 | 1.00 | 1.00 | 1.00 | 13.00 | 0.00 | 2.00 | 0.00 |
| 0.00 | 0 | 1.00 | 1.00 | 2.00 | 35.00 | 1.00 | 2.00 | 0.00 |
| 0.00 | 1 | 1.00 | 1.00 | 1.00 | 20.00 | 0.00 | 1.00 | 2.00 |
| 0.00 | 0 | 1.00 | 1.00 | 2.00 | 36.00 | 1.00 | 2.00 | 0.00 |
| 0.00 | 0 | 1.00 | 1.00 | 1.00 | 54.00 | 1.00 | 1.00 | 0.00 |
| 0.00 | 1 | 2.00 | 1.00 | 1.00 | 16.00 | 0.00 | 1.00 | 0.00 |
| 0.00 | 0 | 1.00 | 1.00 | 1.00 | 19.00 | 0.00 | 2.00 | 1.00 |
| 0.00 | 1 | 1.00 | 1.00 | 1.00 | 15.00 | 0.00 | 1.00 | 1.00 |
| 0.00 | 1 | 2.00 | 1.00 | 1.00 | 19.00 | 0.00 | 2.00 | 2.00 |
| 0.00 | 1 | 2.00 | 2.00 | 1.00 | 15.00 | 0.00 | 2.00 | 1.00 |
| 0.00 | 0 | 1.00 | 1.00 | 1.00 | 36.00 | 1.00 | 2.00 | 2.00 |
| 1.00 | 1 | 1.00 | 1.00 | 1.00 | 17.00 | 0.00 | 3.00 | 0.00 |
| 0.00 | 0 | 1.00 | 1.00 | 1.00 | 27.00 | 1.00 | 1.00 | 0.00 |
| 0.00 | 1 | 1.00 | 1.00 | 1.00 | 13.00 | 0.00 | 1.00 | 0.00 |
| 0.00 | 1 | 1.00 | 1.00 | 1.00 | 18.00 | 0.00 | 2.00 | 0.00 |
| 0.00 | 0 | 1.00 | 1.00 | 2.00 | 61.00 | 1.00 | 3.00 | 0.00 |
| 0.00 | 0 | 2.00 | 1.00 | 2.00 | 29.00 | 1.00 | 2.00 | 0.00 |
| 1.00 | 1 | 1.00 | 1.00 | 1.00 | 17.00 | 0.00 | 2.00 | 1.00 |

|      |   |      |      |      |       |      |      |      |
|------|---|------|------|------|-------|------|------|------|
| 1.00 | 0 | 1.00 | 1.00 | 1.00 | 25.00 | 1.00 | 2.00 | 2.00 |
| 0.00 | 1 | 1.00 | 1.00 | 1.00 | 16.00 | 0.00 | 2.00 | 0.00 |
| 0.00 | 1 | 1.00 | 1.00 | 1.00 | 11.00 | 0.00 | 1.00 | 0.00 |
| 0.00 | 1 | 1.00 | 1.00 | 1.00 | 15.00 | 0.00 | 3.00 | 0.00 |
| 0.00 | 0 | 1.00 | 1.00 | 1.00 | 46.00 | 1.00 | 2.00 | 0.00 |
| 0.00 | 1 | 1.00 | 1.00 | 1.00 | 23.00 | 0.00 | 1.00 | 0.00 |
| 0.00 | 1 | 1.00 | 1.00 | 1.00 | 10.00 | 0.00 | 3.00 | 1.00 |
| 0.00 | 0 | 1.00 | 1.00 | 2.00 | 40.00 | 1.00 | 1.00 | 1.00 |
| 0.00 | 0 | 1.00 | 1.00 | 2.00 | 46.00 | 1.00 | 2.00 | 1.00 |
| 0.00 | 1 | 2.00 | 1.00 | 1.00 | 14.00 | 0.00 | 3.00 | 1.00 |
| 1.00 | 1 | 1.00 | 1.00 | 1.00 | 54.00 | 1.00 | 2.00 | 1.00 |
| 0.00 | 1 | 1.00 | 1.00 | 1.00 | 13.00 | 0.00 | 2.00 | 1.00 |
| 0.00 | 0 | 2.00 | 2.00 | 1.00 | 41.00 | 1.00 | 1.00 | 1.00 |
| 0.00 | 1 | 2.00 | 1.00 | 1.00 | 12.00 | 0.00 | 1.00 | 1.00 |
| 0.00 | 0 | 1.00 | 1.00 | 1.00 | 28.00 | 1.00 | 2.00 | 1.00 |
| 0.00 | 1 | 1.00 | 1.00 | 1.00 | 41.00 | 1.00 | 2.00 | 1.00 |
| 0.00 | 1 | 1.00 | 1.00 | 1.00 | 17.00 | 0.00 | 3.00 | 1.00 |
| 0.00 | 0 | 2.00 | 2.00 | 1.00 | 36.00 | 1.00 | 2.00 | 0.00 |
| 0.00 | 1 | 2.00 | 1.00 | 1.00 | 17.00 | 0.00 | 3.00 | 0.00 |
| 0.00 | 0 | 1.00 | 1.00 | 2.00 | 35.00 | 1.00 | 3.00 | 0.00 |
| 1.00 | 0 | 1.00 | 1.00 | 1.00 | 59.00 | 1.00 | 2.00 | 0.00 |
| 0.00 | 1 | 2.00 | 1.00 | 1.00 | 17.00 | 0.00 | 2.00 | 1.00 |
| 0.00 | 0 | 1.00 | 1.00 | 2.00 | 48.00 | 1.00 | 2.00 | 1.00 |
| 0.00 | 1 | 2.00 | 2.00 | 1.00 | 20.00 | 0.00 | 2.00 | 0.00 |
| 0.00 | 1 | 1.00 | 1.00 | 1.00 | 28.00 | 1.00 | 2.00 | 2.00 |
| 0.00 | 1 | 1.00 | 1.00 | 1.00 | 13.00 | 0.00 | 2.00 | 2.00 |
| 0.00 | 1 | 2.00 | 1.00 | 1.00 | 19.00 | 0.00 | 2.00 | 2.00 |
| 0.00 | 0 | 1.00 | 1.00 | 1.00 | 38.00 | 1.00 | 1.00 | 2.00 |
| 0.00 | 1 | 1.00 | 1.00 | 1.00 | 11.00 | 0.00 | 2.00 | 1.00 |
| 1.00 | 0 | 1.00 | 1.00 | 2.00 | 60.00 | 1.00 | 2.00 | 2.00 |
| 0.00 | 1 | 1.00 | 1.00 | 1.00 | 13.00 | 0.00 | 1.00 | 0.00 |
| 0.00 | 1 | 2.00 | 1.00 | 1.00 | 52.00 | 1.00 | 2.00 | 2.00 |
| 0.00 | 0 | 2.00 | 2.00 | 2.00 | 15.00 | 0.00 | 2.00 | 0.00 |
| 0.00 | 1 | 1.00 | 1.00 | 1.00 | 15.00 | 0.00 | 2.00 | 2.00 |
| 0.00 | 0 | 2.00 | 2.00 | 1.00 | 64.00 | 1.00 | 2.00 | 0.00 |
| 0.00 | 1 | 2.00 | 1.00 | 1.00 | 19.00 | 0.00 | 2.00 | 0.00 |
| 0.00 | 1 | 1.00 | 1.00 | 1.00 | 68.00 | 1.00 | 2.00 | 0.00 |
| 0.00 | 0 | 1.00 | 1.00 | 1.00 | 92.00 | 1.00 | 2.00 | 0.00 |
| 0.00 | 1 | 1.00 | 1.00 | 1.00 | 18.00 | 0.00 | 2.00 | 0.00 |
| 0.00 | 1 | 1.00 | 1.00 | 1.00 | 10.00 | 0.00 | 3.00 | 1.00 |
| 0.00 | 0 | 1.00 | 1.00 | 2.00 | 39.00 | 1.00 | 1.00 | 0.00 |
| 1.00 | 0 | 2.00 | 2.00 | 2.00 | 14.00 | 0.00 | 2.00 | 1.00 |
| 0.00 | 1 | 1.00 | 1.00 | 1.00 | 13.00 | 0.00 | 1.00 | 1.00 |
| 0.00 | 0 | 1.00 | 1.00 | 1.00 | 35.00 | 1.00 | 3.00 | 1.00 |
| 0.00 | 1 | 1.00 | 1.00 | 1.00 | 11.00 | 0.00 | 1.00 | 1.00 |
| 0.00 | 1 | 1.00 | 1.00 | 1.00 | 48.00 | 1.00 | 1.00 | 0.00 |
| 0.00 | 0 | 1.00 | 1.00 | 2.00 | 54.00 | 1.00 | 1.00 | 0.00 |

|      |   |      |      |      |       |      |      |      |
|------|---|------|------|------|-------|------|------|------|
| 0.00 | 1 | 1.00 | 1.00 | 1.00 | 19.00 | 0.00 | 1.00 | 2.00 |
| 0.00 | 1 | 1.00 | 1.00 | 1.00 | 18.00 | 0.00 | 2.00 | 0.00 |
| 0.00 | 0 | 1.00 | 1.00 | 1.00 | 13.00 | 0.00 | 1.00 | 0.00 |
| 0.00 | 0 | 2.00 | 2.00 | 2.00 | 76.00 | 1.00 | 3.00 | 1.00 |
| 0.00 | 1 | 1.00 | 1.00 | 1.00 | 16.00 | 0.00 | 1.00 | 0.00 |
| 0.00 | 0 | 1.00 | 1.00 | 2.00 | 38.00 | 1.00 | 1.00 | 0.00 |
| 0.00 | 0 | 1.00 | 1.00 | 2.00 | 41.00 | 1.00 | 2.00 | 0.00 |
| 0.00 | 1 | 2.00 | 1.00 | 1.00 | 13.00 | 0.00 | 1.00 | 0.00 |
| 0.00 | 0 | 1.00 | 1.00 | 2.00 | 36.00 | 1.00 | 3.00 | 1.00 |
| 0.00 | 1 | 1.00 | 1.00 | 1.00 | 11.00 | 0.00 | 3.00 | 2.00 |
| 0.00 | 0 | 1.00 | 1.00 | 1.00 | 69.00 | 1.00 | 2.00 | 2.00 |
| 0.00 | 1 | 1.00 | 1.00 | 1.00 | 13.00 | 0.00 | 3.00 | 2.00 |
| 0.00 | 1 | 2.00 | 1.00 | 1.00 | 51.00 | 1.00 | 2.00 | 2.00 |
| 0.00 | 1 | 1.00 | 1.00 | 1.00 | 15.00 | 0.00 | 1.00 | 0.00 |
| 0.00 | 1 | 1.00 | 1.00 | 1.00 | 10.00 | 0.00 | 2.00 | 0.00 |
| 0.00 | 0 | 1.00 | 1.00 | 1.00 | 46.00 | 1.00 | 2.00 | 0.00 |
| 0.00 | 1 | 1.00 | 1.00 | 1.00 | 15.00 | 0.00 | 1.00 | 0.00 |
| 0.00 | 0 | 2.00 | 2.00 | 2.00 | 51.00 | 1.00 | 2.00 | 2.00 |
| 0.00 | 1 | 1.00 | 1.00 | 1.00 | 12.00 | 0.00 | 3.00 | 1.00 |
| 0.00 | 0 | 1.00 | 1.00 | 2.00 | 35.00 | 1.00 | 3.00 | 1.00 |
| 0.00 | 1 | 1.00 | 1.00 | 1.00 | 18.00 | 0.00 | 3.00 | 1.00 |
| 0.00 | 1 | 1.00 | 1.00 | 1.00 | 16.00 | 0.00 | 2.00 | 0.00 |
| 0.00 | 0 | 2.00 | 2.00 | 1.00 | 21.00 | 0.00 | 3.00 | 0.00 |
| 0.00 | 0 | 2.00 | 2.00 | 2.00 | 52.00 | 1.00 | 2.00 | 0.00 |
| 0.00 | 0 | 1.00 | 1.00 | 2.00 | 14.00 | 0.00 | 2.00 | 0.00 |
| 0.00 | 1 | 1.00 | 1.00 | 1.00 | 13.00 | 0.00 | 2.00 | 0.00 |
| 0.00 | 0 | 1.00 | 1.00 | 1.00 | 28.00 | 1.00 | 1.00 | 0.00 |
| 1.00 | 1 | 1.00 | 1.00 | 1.00 | 11.00 | 0.00 | 2.00 | 0.00 |
| 0.00 | 0 | 1.00 | 1.00 | 1.00 | 75.00 | 1.00 | 3.00 | 0.00 |
| 0.00 | 1 | 1.00 | 1.00 | 1.00 | 17.00 | 0.00 | 2.00 | 0.00 |
| 0.00 | 0 | 1.00 | 1.00 | 1.00 | 30.00 | 1.00 | 3.00 | 1.00 |
| 1.00 | 1 | 1.00 | 2.00 | 1.00 | 9.00  | 0.00 | 2.00 | 0.00 |
| 1.00 | 0 | 2.00 | 2.00 | 1.00 | 44.00 | 1.00 | 3.00 | 1.00 |
| 1.00 | 0 | 1.00 | 1.00 | 2.00 | 34.00 | 1.00 | 2.00 | 0.00 |
| 0.00 | 1 | 1.00 | 1.00 | 1.00 | 17.00 | 0.00 | 1.00 | 0.00 |
| 0.00 | 1 | 2.00 | 1.00 | 1.00 | 18.00 | 0.00 | 2.00 | 2.00 |
| 0.00 | 0 | 1.00 | 1.00 | 2.00 | 41.00 | 1.00 | 2.00 | 1.00 |
| 0.00 | 1 | 1.00 | 1.00 | 1.00 | 14.00 | 0.00 | 2.00 | 0.00 |
| 0.00 | 1 | 1.00 | 1.00 | 1.00 | 21.00 | 0.00 | 1.00 | 0.00 |
| 0.00 | 0 | 1.00 | 1.00 | 1.00 | 48.00 | 1.00 | 2.00 | 1.00 |
| 0.00 | 1 | 1.00 | 1.00 | 1.00 | 24.00 | 1.00 | 1.00 | 0.00 |
| 0.00 | 1 | 1.00 | 1.00 | 1.00 | 17.00 | 0.00 | 1.00 | 2.00 |
| 0.00 | 1 | 1.00 | 1.00 | 1.00 | 39.00 | 1.00 | 2.00 | 0.00 |
| 0.00 | 0 | 1.00 | 1.00 | 1.00 | 66.00 | 1.00 | 2.00 | 0.00 |
| 0.00 | 1 | 1.00 | 1.00 | 1.00 | 15.00 | 0.00 | 2.00 | 0.00 |
| 0.00 | 0 | 2.00 | 1.00 | 1.00 | 36.00 | 1.00 | 2.00 | 1.00 |
| 0.00 | 1 | 1.00 | 1.00 | 1.00 | 24.00 | 1.00 | 2.00 | 1.00 |

|      |   |      |      |      |       |      |      |      |
|------|---|------|------|------|-------|------|------|------|
| 0.00 | 1 | 1.00 | 1.00 | 1.00 | 18.00 | 0.00 | 2.00 | 2.00 |
| 0.00 | 0 | 1.00 | 1.00 | 1.00 | 72.00 | 1.00 | 2.00 | 1.00 |
| 0.00 | 1 | 1.00 | 1.00 | 1.00 | 20.00 | 0.00 | 2.00 | 2.00 |
| 0.00 | 0 | 2.00 | 1.00 | 1.00 | 26.00 | 1.00 | 2.00 | 2.00 |
| 0.00 | 0 | 2.00 | 1.00 | 1.00 | 38.00 | 1.00 | 2.00 | 0.00 |
| 0.00 | 1 | 1.00 | 1.00 | 1.00 | 14.00 | 0.00 | 2.00 | 0.00 |
| 0.00 | 1 | 1.00 | 1.00 | 1.00 | 17.00 | 0.00 | 2.00 | 0.00 |
| 0.00 | 0 | 1.00 | 1.00 | 1.00 | 43.00 | 1.00 | 1.00 | 0.00 |
| 0.00 | 0 | 1.00 | 1.00 | 1.00 | 12.00 | 0.00 | 3.00 | 2.00 |
| 1.00 | 0 | 1.00 | 1.00 | 1.00 | 41.00 | 1.00 | 1.00 | 0.00 |
| 0.00 | 1 | 1.00 | 1.00 | 1.00 | 13.00 | 0.00 | 1.00 | 2.00 |
| 0.00 | 0 | 1.00 | 1.00 | 1.00 | 53.00 | 1.00 | 2.00 | 0.00 |
| 0.00 | 1 | 1.00 | 1.00 | 1.00 | 16.00 | 0.00 | 1.00 | 1.00 |
| 0.00 | 0 | 2.00 | 1.00 | 1.00 | 33.00 | 1.00 | 1.00 | 2.00 |
| 1.00 | 1 | 1.00 | 1.00 | 1.00 | 12.00 | 0.00 | 1.00 | 1.00 |
| 0.00 | 0 | 1.00 | 1.00 | 1.00 | 76.00 | 1.00 | 2.00 | 2.00 |
| 0.00 | 1 | 1.00 | 1.00 | 1.00 | 65.00 | 1.00 | 3.00 | 1.00 |
| 0.00 | 1 | 1.00 | 1.00 | 1.00 | 21.00 | 0.00 | 2.00 | 1.00 |
| 0.00 | 0 | 1.00 | 1.00 | 1.00 | 44.00 | 1.00 | 2.00 | 1.00 |
| 0.00 | 0 | 1.00 | 1.00 | 1.00 | 38.00 | 1.00 | 1.00 | 1.00 |
| 0.00 | 1 | 1.00 | 1.00 | 1.00 | 9.00  | 0.00 | 2.00 | 1.00 |
| 0.00 | 0 | 1.00 | 1.00 | 1.00 | 86.00 | 1.00 | 2.00 | 0.00 |
| 0.00 | 1 | 2.00 | 1.00 | 1.00 | 29.00 | 1.00 | 2.00 | 2.00 |
| 0.00 | 0 | 2.00 | 2.00 | 2.00 | 16.00 | 0.00 | 3.00 | 1.00 |
| 0.00 | 1 | 1.00 | 1.00 | 1.00 | 22.00 | 0.00 | 1.00 | 0.00 |
| 0.00 | 1 | 1.00 | 1.00 | 1.00 | 26.00 | 1.00 | 2.00 | 2.00 |
| 0.00 | 0 | 1.00 | 1.00 | 2.00 | 11.00 | 0.00 | 1.00 | 0.00 |
| 0.00 | 0 | 1.00 | 1.00 | 2.00 | 51.00 | 1.00 | 2.00 | 0.00 |
| 0.00 | 1 | 2.00 | 1.00 | 1.00 | 30.00 | 1.00 | 3.00 | 2.00 |
| 0.00 | 0 | 1.00 | 1.00 | 1.00 | 19.00 | 0.00 | 1.00 | 2.00 |
| 0.00 | 1 | 1.00 | 1.00 | 1.00 | 21.00 | 0.00 | 2.00 | 2.00 |
| 0.00 | 1 | 1.00 | 1.00 | 1.00 | 19.00 | 0.00 | 2.00 | 2.00 |
| 0.00 | 1 | 1.00 | 1.00 | 1.00 | 26.00 | 1.00 | 2.00 | 2.00 |
| 0.00 | 0 | 1.00 | 1.00 | 1.00 | 44.00 | 1.00 | 3.00 | 2.00 |
| 1.00 | 1 | 1.00 | 2.00 | 1.00 | 14.00 | 0.00 | 2.00 | 0.00 |
| 0.00 | 0 | 1.00 | 1.00 | 2.00 | 46.00 | 1.00 | 2.00 | 1.00 |
| 0.00 | 0 | 1.00 | 1.00 | 2.00 | 8.00  | 0.00 | 1.00 | 2.00 |
| 0.00 | 1 | 1.00 | 1.00 | 1.00 | 13.00 | 0.00 | 2.00 | 0.00 |
| 0.00 | 1 | 1.00 | 1.00 | 1.00 | 17.00 | 0.00 | 2.00 | 0.00 |
| 0.00 | 0 | 1.00 | 1.00 | 1.00 | 44.00 | 1.00 | 2.00 | 1.00 |
| 0.00 | 0 | 1.00 | 1.00 | 1.00 | 52.00 | 1.00 | 2.00 | 0.00 |
| 0.00 | 1 | 1.00 | 2.00 | 1.00 | 15.00 | 0.00 | 2.00 | 1.00 |
| 0.00 | 0 | 1.00 | 1.00 | 1.00 | 45.00 | 1.00 | 2.00 | 2.00 |
| 0.00 | 1 | 1.00 | 1.00 | 1.00 | 51.00 | 1.00 | 3.00 | 0.00 |
| 0.00 | 1 | 1.00 | 1.00 | 1.00 | 35.00 | 1.00 | 2.00 | 0.00 |
| 0.00 | 1 | 1.00 | 1.00 | 1.00 | 20.00 | 0.00 | 2.00 | 0.00 |
| 0.00 | 1 | 1.00 | 1.00 | 1.00 | 12.00 | 0.00 | 3.00 | 0.00 |

|      |   |      |      |      |       |      |      |      |
|------|---|------|------|------|-------|------|------|------|
| 0.00 | 0 | 1.00 | 1.00 | 1.00 | 50.00 | 1.00 | 2.00 | 0.00 |
| 0.00 | 0 | 1.00 | 1.00 | 1.00 | 15.00 | 0.00 | 2.00 | 0.00 |
| 0.00 | 0 | 1.00 | 1.00 | 1.00 | 32.00 | 1.00 | 2.00 | 2.00 |
| 0.00 | 1 | 1.00 | 1.00 | 1.00 | 36.00 | 1.00 | 1.00 | 0.00 |
| 0.00 | 1 | 1.00 | 1.00 | 1.00 | 11.00 | 0.00 | 1.00 | 0.00 |
| 0.00 | 0 | 1.00 | 1.00 | 1.00 | 48.00 | 1.00 | 2.00 | 0.00 |
| 0.00 | 0 | 1.00 | 1.00 | 1.00 | 22.00 | 0.00 | 2.00 | 2.00 |
| 0.00 | 1 | 1.00 | 1.00 | 1.00 | 21.00 | 0.00 | 2.00 | 0.00 |
| 0.00 | 0 | 1.00 | 1.00 | 1.00 | 36.00 | 1.00 | 2.00 | 0.00 |
| 0.00 | 0 | 1.00 | 1.00 | 1.00 | 15.00 | 0.00 | 1.00 | 0.00 |
| 0.00 | 1 | 1.00 | 1.00 | 1.00 | 14.00 | 0.00 | 2.00 | 0.00 |
| 0.00 | 0 | 1.00 | 1.00 | 1.00 | 45.00 | 1.00 | 2.00 | 0.00 |
| 0.00 | 1 | 2.00 | 1.00 | 1.00 | 12.00 | 0.00 | 2.00 | 0.00 |
| 0.00 | 1 | 1.00 | 1.00 | 1.00 | 12.00 | 0.00 | 2.00 | 0.00 |
| 0.00 | 0 | 1.00 | 1.00 | 1.00 | 9.00  | 0.00 | 3.00 | 0.00 |
| 0.00 | 0 | 1.00 | 1.00 | 2.00 | 23.00 | 0.00 | 2.00 | 0.00 |
| 0.00 | 0 | 1.00 | 1.00 | 2.00 | 67.00 | 1.00 | 2.00 | 2.00 |
| 1.00 | 1 | 1.00 | 1.00 | 1.00 | 16.00 | 0.00 | 2.00 | 0.00 |
| 0.00 | 0 | 1.00 | 1.00 | 1.00 | 81.00 | 1.00 | 2.00 | 0.00 |
| 1.00 | 0 | 2.00 | 2.00 | 1.00 | 33.00 | 1.00 | 2.00 | 0.00 |
| 0.00 | 1 | 1.00 | 1.00 | 1.00 | 12.00 | 0.00 | 2.00 | 0.00 |
| 0.00 | 1 | 1.00 | 1.00 | 1.00 | 25.00 | 1.00 | 2.00 | 1.00 |
| 1.00 | 0 | 1.00 | 2.00 | 1.00 | 13.00 | 0.00 | 2.00 | 2.00 |
| 0.00 | 0 | 2.00 | 2.00 | 1.00 | 21.00 | 0.00 | 2.00 | 2.00 |
| 0.00 | 1 | 1.00 | 1.00 | 1.00 | 12.00 | 0.00 | 2.00 | 2.00 |
| 0.00 | 0 | 1.00 | 1.00 | 1.00 | 47.00 | 1.00 | 3.00 | 2.00 |
| 0.00 | 1 | 1.00 | 1.00 | 1.00 | 46.00 | 1.00 | 2.00 | 1.00 |
| 0.00 | 1 | 2.00 | 2.00 | 1.00 | 18.00 | 0.00 | 3.00 | 2.00 |
| 0.00 | 1 | 2.00 | 1.00 | 1.00 | 52.00 | 1.00 | 2.00 | 2.00 |
| 0.00 | 1 | 1.00 | 1.00 | 1.00 | 13.00 | 0.00 | 2.00 | 2.00 |
| 0.00 | 1 | 1.00 | 1.00 | 1.00 | 11.00 | 0.00 | 1.00 | 2.00 |
| 0.00 | 1 | 1.00 | 1.00 | 1.00 | 13.00 | 0.00 | 2.00 | 2.00 |
| 1.00 | 0 | 1.00 | 2.00 | 1.00 | 21.00 | 0.00 | 2.00 | 0.00 |
| 0.00 | 1 | 1.00 | 1.00 | 1.00 | 26.00 | 1.00 | 2.00 | 2.00 |
| 0.00 | 0 | 1.00 | 1.00 | 1.00 | 52.00 | 1.00 | 2.00 | 2.00 |
| 0.00 | 1 | 1.00 | 1.00 | 1.00 | 10.00 | 0.00 | 2.00 | 2.00 |
| 0.00 | 1 | 1.00 | 1.00 | 1.00 | 14.00 | 0.00 | 2.00 | 2.00 |
| 0.00 | 1 | 2.00 | 1.00 | 1.00 | 19.00 | 0.00 | 2.00 | 2.00 |
| 0.00 | 1 | 1.00 | 1.00 | 1.00 | 19.00 | 0.00 | 2.00 | 2.00 |
| 0.00 | 1 | 1.00 | 1.00 | 1.00 | 16.00 | 0.00 | 2.00 | 2.00 |
| 0.00 | 0 | 1.00 | 1.00 | 2.00 | 49.00 | 1.00 | 3.00 | 1.00 |
| 0.00 | 1 | 1.00 | 1.00 | 1.00 | 16.00 | 0.00 | 2.00 | 0.00 |
| 0.00 | 1 | 1.00 | 1.00 | 1.00 | 85.00 | 1.00 | 2.00 | 2.00 |
| 0.00 | 0 | 1.00 | 1.00 | 1.00 | 58.00 | 1.00 | 1.00 | 0.00 |
| 0.00 | 1 | 1.00 | 1.00 | 1.00 | 20.00 | 0.00 | 1.00 | 0.00 |
| 0.00 | 1 | 1.00 | 1.00 | 1.00 | 14.00 | 0.00 | 3.00 | 2.00 |
| 0.00 | 1 | 1.00 | 1.00 | 1.00 | 13.00 | 0.00 | 2.00 | 2.00 |



|      |   |      |      |      |       |      |      |      |
|------|---|------|------|------|-------|------|------|------|
| 0.00 | 0 | 1.00 | 1.00 | 1.00 | 45.00 | 1.00 | 2.00 | 2.00 |
| 1.00 | 1 | 1.00 | 1.00 | 1.00 | 24.00 | 1.00 | 2.00 | 1.00 |
| 0.00 | 1 | 1.00 | 1.00 | 1.00 | 16.00 | 0.00 | 1.00 | 2.00 |
| 0.00 | 1 | 2.00 | 2.00 | 1.00 | 31.00 | 1.00 | 2.00 | 1.00 |
| 0.00 | 1 | 1.00 | 1.00 | 1.00 | 22.00 | 0.00 | 1.00 | 2.00 |
| 0.00 | 1 | 1.00 | 1.00 | 1.00 | 73.00 | 1.00 | 1.00 | 2.00 |
| 0.00 | 1 | 1.00 | 1.00 | 1.00 | 14.00 | 0.00 | 2.00 | 1.00 |
| 0.00 | 0 | 1.00 | 1.00 | 2.00 | 36.00 | 1.00 | 3.00 | 1.00 |
| 0.00 | 0 | 1.00 | 1.00 | 2.00 | 12.00 | 0.00 | 2.00 | 1.00 |
| 1.00 | 0 | 2.00 | 2.00 | 1.00 | 44.00 | 1.00 | 3.00 | 1.00 |
| 0.00 | 1 | 2.00 | 1.00 | 1.00 | 14.00 | 0.00 | 3.00 | 1.00 |
| 0.00 | 0 | 1.00 | 1.00 | 2.00 | 45.00 | 1.00 | 3.00 | 1.00 |
| 0.00 | 1 | 1.00 | 1.00 | 1.00 | 16.00 | 0.00 | 3.00 | 1.00 |
| 0.00 | 1 | 2.00 | 1.00 | 1.00 | 24.00 | 1.00 | 3.00 | 0.00 |
| 0.00 | 1 | 1.00 | 1.00 | 1.00 | 22.00 | 0.00 | 2.00 | 1.00 |
| 0.00 | 0 | 2.00 | 1.00 | 2.00 | 24.00 | 1.00 | 2.00 | 1.00 |
| 0.00 | 1 | 1.00 | 1.00 | 1.00 | 15.00 | 0.00 | 3.00 | 1.00 |
| 0.00 | 1 | 1.00 | 1.00 | 1.00 | 15.00 | 0.00 | 2.00 | 1.00 |
| 0.00 | 1 | 1.00 | 1.00 | 1.00 | 16.00 | 0.00 | 3.00 | 1.00 |
| 1.00 | 1 | 1.00 | 2.00 | 1.00 | 29.00 | 1.00 | 2.00 | 1.00 |
| 0.00 | 1 | 1.00 | 1.00 | 1.00 | 14.00 | 0.00 | 2.00 | 1.00 |
| 0.00 | 1 | 1.00 | 1.00 | 1.00 | 35.00 | 1.00 | 2.00 | 1.00 |
| 1.00 | 1 | 1.00 | 1.00 | 1.00 | 11.00 | 0.00 | 1.00 | 1.00 |
| 0.00 | 0 | 2.00 | 1.00 | 1.00 | 21.00 | 0.00 | 2.00 | 2.00 |
| 0.00 | 0 | 1.00 | 1.00 | 2.00 | 35.00 | 1.00 | 2.00 | 2.00 |
| 0.00 | 1 | 1.00 | 1.00 | 1.00 | 18.00 | 0.00 | 1.00 | 1.00 |
| 0.00 | 1 | 1.00 | 1.00 | 1.00 | 12.00 | 0.00 | 2.00 | 1.00 |
| 0.00 | 1 | 2.00 | 1.00 | 1.00 | 22.00 | 0.00 | 2.00 | 0.00 |
| 0.00 | 1 | 1.00 | 1.00 | 1.00 | 47.00 | 1.00 | 1.00 | 2.00 |
| 0.00 | 0 | 1.00 | 1.00 | 1.00 | 43.00 | 1.00 | 2.00 | 2.00 |
| 0.00 | 0 | 1.00 | 1.00 | 2.00 | 16.00 | 0.00 | 2.00 | 1.00 |
| 0.00 | 1 | 1.00 | 1.00 | 1.00 | 9.00  | 0.00 | 2.00 | 1.00 |
| 0.00 | 1 | 1.00 | 1.00 | 1.00 | 46.00 | 1.00 | 1.00 | 1.00 |
| 1.00 | 0 | 1.00 | 1.00 | 1.00 | 27.00 | 1.00 | 1.00 | 2.00 |
| 0.00 | 1 | 1.00 | 1.00 | 1.00 | 18.00 | 0.00 | 3.00 | 0.00 |
| 0.00 | 1 | 1.00 | 1.00 | 1.00 | 19.00 | 0.00 | 1.00 | 0.00 |
| 1.00 | 0 | 1.00 | 1.00 | 1.00 | 36.00 | 1.00 | 1.00 | 0.00 |
| 0.00 | 1 | 1.00 | 1.00 | 1.00 | 17.00 | 0.00 | 2.00 | 0.00 |
| 0.00 | 0 | 1.00 | 1.00 | 1.00 | 75.00 | 1.00 | 3.00 | 0.00 |
| 0.00 | 1 | 1.00 | 2.00 | 1.00 | 21.00 | 0.00 | 1.00 | 0.00 |
| 0.00 | 1 | 1.00 | 1.00 | 1.00 | 68.00 | 1.00 | 2.00 | 0.00 |
| 0.00 | 1 | 1.00 | 1.00 | 1.00 | 11.00 | 0.00 | 2.00 | 0.00 |
| 0.00 | 1 | 2.00 | 1.00 | 1.00 | 14.00 | 0.00 | 1.00 | 0.00 |
| 1.00 | 0 | 1.00 | 1.00 | 1.00 | 44.00 | 1.00 | 3.00 | 0.00 |
| 0.00 | 0 | 1.00 | 1.00 | 1.00 | 51.00 | 1.00 | 1.00 | 0.00 |
| 1.00 | 1 | 1.00 | 2.00 | 1.00 | 9.00  | 0.00 | 2.00 | 0.00 |
| 0.00 | 0 | 1.00 | 1.00 | 2.00 | 47.00 | 1.00 | 2.00 | 0.00 |

|      |   |      |      |      |       |      |      |      |
|------|---|------|------|------|-------|------|------|------|
| 0.00 | 0 | 1.00 | 1.00 | 2.00 | 10.00 | 0.00 | 2.00 | 0.00 |
| 0.00 | 0 | 1.00 | 1.00 | 1.00 | 25.00 | 1.00 | 3.00 | 0.00 |
| 0.00 | 1 | 1.00 | 1.00 | 1.00 | 10.00 | 0.00 | 2.00 | 0.00 |
| 0.00 | 0 | 1.00 | 1.00 | 1.00 | 29.00 | 1.00 | 2.00 | 0.00 |
| 0.00 | 0 | 2.00 | 2.00 | 2.00 | 38.00 | 1.00 | 2.00 | 0.00 |
| 0.00 | 1 | 2.00 | 1.00 | 1.00 | 20.00 | 0.00 | 2.00 | 0.00 |
| 0.00 | 1 | 1.00 | 1.00 | 1.00 | 10.00 | 0.00 | 3.00 | 0.00 |
| 0.00 | 0 | 1.00 | 1.00 | 2.00 | 70.00 | 1.00 | 3.00 | 2.00 |
| 0.00 | 1 | 2.00 | 1.00 | 1.00 | 19.00 | 0.00 | 2.00 | 0.00 |
| 0.00 | 1 | 1.00 | 1.00 | 1.00 | 32.00 | 1.00 | 2.00 | 0.00 |
| 0.00 | 0 | 1.00 | 1.00 | 1.00 | 28.00 | 1.00 | 1.00 | 0.00 |
| 0.00 | 0 | 1.00 | 1.00 | 1.00 | 26.00 | 1.00 | 2.00 | 0.00 |
| 0.00 | 1 | 1.00 | 1.00 | 1.00 | 11.00 | 0.00 | 2.00 | 2.00 |
| 0.00 | 1 | 1.00 | 1.00 | 1.00 | 13.00 | 0.00 | 3.00 | 0.00 |
| 0.00 | 0 | 1.00 | 1.00 | 1.00 | 36.00 | 1.00 | 1.00 | 0.00 |
| 0.00 | 1 | 1.00 | 1.00 | 1.00 | 43.00 | 1.00 | 1.00 | 0.00 |
| 0.00 | 0 | 1.00 | 1.00 | 2.00 | 61.00 | 1.00 | 2.00 | 0.00 |
| 0.00 | 1 | 1.00 | 1.00 | 1.00 | 9.00  | 0.00 | 2.00 | 0.00 |
| 0.00 | 0 | 1.00 | 1.00 | 1.00 | 19.00 | 0.00 | 1.00 | 0.00 |
| 0.00 | 0 | 1.00 | 1.00 | 2.00 | 70.00 | 1.00 | 1.00 | 0.00 |
| 0.00 | 1 | 1.00 | 1.00 | 1.00 | 15.00 | 0.00 | 2.00 | 0.00 |
| 0.00 | 0 | 2.00 | 2.00 | 1.00 | 45.00 | 1.00 | 3.00 | 0.00 |
| 0.00 | 0 | 1.00 | 1.00 | 2.00 | 30.00 | 1.00 | 3.00 | 0.00 |
| 0.00 | 1 | 1.00 | 1.00 | 1.00 | 22.00 | 0.00 | 1.00 | 0.00 |
| 1.00 | 0 | 1.00 | 2.00 | 2.00 | 31.00 | 1.00 | 2.00 | 0.00 |
| 0.00 | 0 | 1.00 | 1.00 | 1.00 | 18.00 | 0.00 | 2.00 | 0.00 |
| 0.00 | 1 | 1.00 | 1.00 | 1.00 | 12.00 | 0.00 | 2.00 | 0.00 |
| 0.00 | 0 | 1.00 | 1.00 | 1.00 | 61.00 | 1.00 | 1.00 | 0.00 |
| 0.00 | 0 | 1.00 | 1.00 | 1.00 | 62.00 | 1.00 | 2.00 | 0.00 |
| 0.00 | 1 | 1.00 | 1.00 | 1.00 | 20.00 | 0.00 | 1.00 | 0.00 |
| 0.00 | 1 | 2.00 | 1.00 | 1.00 | 17.00 | 0.00 | 2.00 | 0.00 |
| 0.00 | 1 | 1.00 | 1.00 | 1.00 | 55.00 | 1.00 | 2.00 | 0.00 |
| 0.00 | 0 | 1.00 | 1.00 | 1.00 | 49.00 | 1.00 | 3.00 | 0.00 |
| 0.00 | 1 | 1.00 | 1.00 | 1.00 | 13.00 | 0.00 | 2.00 | 0.00 |
| 0.00 | 0 | 1.00 | 1.00 | 1.00 | 36.00 | 1.00 | 1.00 | 0.00 |
| 0.00 | 1 | 1.00 | 1.00 | 1.00 | 41.00 | 1.00 | 1.00 | 0.00 |
| 0.00 | 0 | 1.00 | 1.00 | 2.00 | 15.00 | 0.00 | 3.00 | 2.00 |
| 1.00 | 0 | 1.00 | 2.00 | 1.00 | 53.00 | 1.00 | 1.00 | 0.00 |
| 0.00 | 1 | 2.00 | 2.00 | 1.00 | 20.00 | 0.00 | 2.00 | 2.00 |
| 1.00 | 0 | 1.00 | 1.00 | 2.00 | 71.00 | 1.00 | 3.00 | 0.00 |
| 0.00 | 0 | 1.00 | 1.00 | 1.00 | 13.00 | 0.00 | 3.00 | 0.00 |
| 0.00 | 1 | 1.00 | 1.00 | 1.00 | 14.00 | 0.00 | 3.00 | 0.00 |
| 0.00 | 0 | 1.00 | 1.00 | 1.00 | 61.00 | 1.00 | 2.00 | 0.00 |
| 0.00 | 0 | 2.00 | 1.00 | 1.00 | 20.00 | 0.00 | 2.00 | 1.00 |
| 0.00 | 0 | 2.00 | 1.00 | 1.00 | 70.00 | 1.00 | 2.00 | 0.00 |
| 0.00 | 1 | 2.00 | 1.00 | 1.00 | 14.00 | 0.00 | 3.00 | 0.00 |
| 0.00 | 0 | 1.00 | 1.00 | 2.00 | 50.00 | 1.00 | 2.00 | 0.00 |

|      |   |      |      |      |       |      |      |      |
|------|---|------|------|------|-------|------|------|------|
| 0.00 | 0 | 1.00 | 1.00 | 2.00 | 59.00 | 1.00 | 2.00 | 1.00 |
| 0.00 | 1 | 1.00 | 1.00 | 1.00 | 15.00 | 0.00 | 3.00 | 1.00 |
| 0.00 | 1 | 1.00 | 1.00 | 1.00 | 14.00 | 0.00 | 2.00 | 1.00 |
| 0.00 | 1 | 1.00 | 1.00 | 1.00 | 18.00 | 0.00 | 2.00 | 1.00 |
| 0.00 | 0 | 1.00 | 1.00 | 2.00 | 72.00 | 1.00 | 2.00 | 1.00 |
| 0.00 | 0 | 1.00 | 1.00 | 2.00 | 12.00 | 0.00 | 1.00 | 0.00 |
| 0.00 | 0 | 1.00 | 1.00 | 2.00 | 68.00 | 1.00 | 2.00 | 1.00 |
| 0.00 | 1 | 1.00 | 1.00 | 1.00 | 13.00 | 0.00 | 2.00 | 0.00 |
| 0.00 | 0 | 1.00 | 1.00 | 1.00 | 54.00 | 1.00 | 3.00 | 1.00 |
| 0.00 | 1 | 2.00 | 1.00 | 1.00 | 13.00 | 0.00 | 1.00 | 1.00 |
| 0.00 | 0 | 1.00 | 1.00 | 2.00 | 48.00 | 1.00 | 3.00 | 1.00 |
| 0.00 | 0 | 2.00 | 1.00 | 2.00 | 18.00 | 0.00 | 2.00 | 2.00 |
| 0.00 | 1 | 1.00 | 1.00 | 1.00 | 13.00 | 0.00 | 2.00 | 0.00 |
| 0.00 | 0 | 1.00 | 1.00 | 1.00 | 75.00 | 1.00 | 3.00 | 0.00 |
| 0.00 | 1 | 2.00 | 1.00 | 1.00 | 21.00 | 0.00 | 2.00 | 0.00 |
| 0.00 | 0 | 1.00 | 1.00 | 1.00 | 38.00 | 1.00 | 2.00 | 0.00 |
| 0.00 | 1 | 1.00 | 1.00 | 1.00 | 10.00 | 0.00 | 2.00 | 2.00 |
| 0.00 | 0 | 1.00 | 1.00 | 2.00 | 35.00 | 1.00 | 2.00 | 0.00 |
| 0.00 | 0 | 1.00 | 1.00 | 1.00 | 40.00 | 1.00 | 1.00 | 0.00 |
| 0.00 | 1 | 1.00 | 1.00 | 1.00 | 9.00  | 0.00 | 3.00 | 0.00 |
| 0.00 | 1 | 1.00 | 1.00 | 1.00 | 19.00 | 0.00 | 1.00 | 0.00 |
| 0.00 | 0 | 1.00 | 1.00 | 1.00 | 48.00 | 1.00 | 3.00 | 0.00 |
| 0.00 | 1 | 1.00 | 1.00 | 1.00 | 65.00 | 1.00 | 3.00 | 0.00 |
| 0.00 | 1 | 1.00 | 1.00 | 1.00 | 15.00 | 0.00 | 1.00 | 0.00 |
| 0.00 | 0 | 1.00 | 1.00 | 1.00 | 41.00 | 1.00 | 3.00 | 0.00 |
| 0.00 | 1 | 1.00 | 1.00 | 1.00 | 10.00 | 0.00 | 2.00 | 0.00 |
| 0.00 | 0 | 1.00 | 1.00 | 1.00 | 28.00 | 1.00 | 3.00 | 0.00 |
| 0.00 | 1 | 1.00 | 1.00 | 1.00 | 10.00 | 0.00 | 2.00 | 0.00 |
| 0.00 | 1 | 1.00 | 1.00 | 1.00 | 17.00 | 0.00 | 3.00 | 0.00 |
| 0.00 | 1 | 1.00 | 1.00 | 1.00 | 23.00 | 0.00 | 2.00 | 2.00 |
| 0.00 | 1 | 1.00 | 1.00 | 1.00 | 31.00 | 1.00 | 2.00 | 2.00 |
| 0.00 | 1 | 1.00 | 1.00 | 1.00 | 14.00 | 0.00 | 2.00 | 2.00 |
| 0.00 | 1 | 1.00 | 1.00 | 1.00 | 43.00 | 1.00 | 1.00 | 2.00 |
| 0.00 | 1 | 1.00 | 1.00 | 1.00 | 11.00 | 0.00 | 2.00 | 1.00 |
| 0.00 | 1 | 2.00 | 1.00 | 1.00 | 20.00 | 0.00 | 2.00 | 2.00 |
| 0.00 | 0 | 1.00 | 1.00 | 1.00 | 44.00 | 1.00 | 1.00 | 1.00 |
| 0.00 | 1 | 1.00 | 1.00 | 1.00 | 40.00 | 1.00 | 2.00 | 2.00 |
| 0.00 | 1 | 1.00 | 1.00 | 1.00 | 11.00 | 0.00 | 2.00 | 2.00 |
| 0.00 | 0 | 1.00 | 1.00 | 1.00 | 54.00 | 1.00 | 3.00 | 1.00 |
| 0.00 | 1 | 1.00 | 1.00 | 1.00 | 18.00 | 0.00 | 2.00 | 0.00 |
| 0.00 | 1 | 1.00 | 1.00 | 1.00 | 47.00 | 1.00 | 2.00 | 2.00 |
| 0.00 | 1 | 1.00 | 1.00 | 1.00 | 18.00 | 0.00 | 2.00 | 2.00 |
| 0.00 | 1 | 1.00 | 1.00 | 1.00 | 16.00 | 0.00 | 2.00 | 1.00 |
| 0.00 | 1 | 2.00 | 1.00 | 1.00 | 13.00 | 0.00 | 2.00 | 2.00 |
| 1.00 | 1 | 1.00 | 1.00 | 1.00 | 20.00 | 0.00 | 3.00 | 1.00 |
| 0.00 | 1 | 1.00 | 1.00 | 1.00 | 19.00 | 0.00 | 2.00 | 2.00 |
| 0.00 | 0 | 2.00 | 1.00 | 1.00 | 54.00 | 1.00 | 2.00 | 2.00 |

|      |   |      |      |      |       |      |      |      |
|------|---|------|------|------|-------|------|------|------|
| 0.00 | 1 | 1.00 | 1.00 | 1.00 | 18.00 | 0.00 | 2.00 | 2.00 |
| 1.00 | 1 | 1.00 | 1.00 | 1.00 | 32.00 | 1.00 | 2.00 | 2.00 |
| 0.00 | 1 | 2.00 | 2.00 | 1.00 | 17.00 | 0.00 | 1.00 | 2.00 |
| 1.00 | 1 | 1.00 | 1.00 | 1.00 | 50.00 | 1.00 | 2.00 | 1.00 |
| 0.00 | 1 | 2.00 | 1.00 | 1.00 | 12.00 | 0.00 | 2.00 | 1.00 |
| 0.00 | 0 | 1.00 | 1.00 | 1.00 | 36.00 | 1.00 | 2.00 | 1.00 |
| 0.00 | 1 | 1.00 | 1.00 | 1.00 | 10.00 | 0.00 | 2.00 | 1.00 |
| 0.00 | 0 | 1.00 | 1.00 | 1.00 | 46.00 | 1.00 | 2.00 | 2.00 |
| 0.00 | 1 | 1.00 | 1.00 | 1.00 | 17.00 | 0.00 | 3.00 | 1.00 |
| 0.00 | 1 | 1.00 | 1.00 | 1.00 | 54.00 | 1.00 | 2.00 | 2.00 |
| 0.00 | 0 | 1.00 | 1.00 | 1.00 | 61.00 | 1.00 | 2.00 | 1.00 |
| 0.00 | 1 | 1.00 | 1.00 | 1.00 | 20.00 | 0.00 | 2.00 | 1.00 |
| 0.00 | 1 | 2.00 | 1.00 | 1.00 | 21.00 | 0.00 | 2.00 | 2.00 |
| 0.00 | 0 | 1.00 | 1.00 | 2.00 | 46.00 | 1.00 | 2.00 | 1.00 |

| Toilet | Light | Fuel | Wealth | Wealth2 | LBW  | ANC  | Timing | Adequacy |
|--------|-------|------|--------|---------|------|------|--------|----------|
| 0.00   | 0.00  | 0.00 | 2.00   | 1.00    | 0.00 | 1.00 | 1.00   | 1.00     |
| 0.00   | 1.00  | 0.00 | 6.00   | 1.00    | 0.00 | 1.00 | 1.00   | 1.00     |
| 0.00   | 1.00  | 0.00 | 6.00   | 1.00    | 0.00 | 1.00 | 1.00   | 1.00     |
| 0.00   | 0.00  | 0.00 | 2.00   | 1.00    | 0.00 | 0.00 | 0.00   | 0.00     |
| 0.00   | 1.00  | 0.00 | 7.00   | 2.00    | 0.00 | 1.00 | 1.00   | 1.00     |
| 1.00   | 0.00  | 0.00 | 10.00  | 2.00    | 0.00 | 0.00 | 0.00   | 0.00     |
| 2.00   | 1.00  | 1.00 | 14.00  | 2.00    | 0.00 | 1.00 | 1.00   | 1.00     |
| 2.00   | 1.00  | 1.00 | 16.00  | 2.00    | 0.00 | 1.00 | 1.00   | 1.00     |
| 0.00   | 1.00  | 0.00 | 7.00   | 2.00    | 0.00 | 1.00 | 1.00   | 1.00     |
| 0.00   | 1.00  | 0.00 | 8.00   | 2.00    | 0.00 | 1.00 | 1.00   | 1.00     |
| 0.00   | 1.00  | 0.00 | 10.00  | 2.00    | 1.00 | 1.00 | 1.00   | 1.00     |
| 0.00   | 1.00  | 0.00 | 8.00   | 2.00    | 0.00 | 1.00 | 1.00   | 1.00     |
| 0.00   | 0.00  | 0.00 | 4.00   | 1.00    | 0.00 | 1.00 | 1.00   | 1.00     |
| 0.00   | 1.00  | 0.00 | 5.00   | 1.00    | 0.00 | 1.00 | 1.00   | 1.00     |
| 0.00   | 1.00  | 0.00 | 13.00  | 2.00    | 1.00 | 1.00 | 1.00   | 1.00     |
| 0.00   | 1.00  | 0.00 | 12.00  | 2.00    | 0.00 | 1.00 | 1.00   | 1.00     |
| 0.00   | 0.00  | 0.00 | 2.00   | 1.00    | 0.00 | 1.00 | 1.00   | 1.00     |
| 0.00   | 0.00  | 0.00 | 11.00  | 2.00    | 0.00 | 1.00 | 1.00   | 1.00     |
| 0.00   | 1.00  | 0.00 | 6.00   | 1.00    | 0.00 | 0.00 | 0.00   | 0.00     |
| 1.00   | 1.00  | 1.00 | 11.00  | 2.00    | 0.00 | 1.00 | 1.00   | 1.00     |
| 0.00   | 0.00  | 0.00 | 2.00   | 1.00    | 0.00 | 1.00 | 1.00   | 1.00     |
| 0.00   | 1.00  | 0.00 | 9.00   | 2.00    | 0.00 | 1.00 | 1.00   | 1.00     |
| 0.00   | 1.00  | 0.00 | 10.00  | 2.00    | 0.00 | 0.00 | 1.00   | 0.00     |
| 2.00   | 1.00  | 1.00 | 19.00  | 2.00    | 0.00 | 1.00 | 1.00   | 1.00     |
| 0.00   | 1.00  | 0.00 | 7.00   | 2.00    | 0.00 | 1.00 | 1.00   | 1.00     |
| 0.00   | 1.00  | 0.00 | 12.00  | 2.00    | 0.00 | 1.00 | 1.00   | 1.00     |
| 1.00   | 1.00  | 0.00 | 9.00   | 2.00    | 0.00 | 1.00 | 1.00   | 1.00     |
| 0.00   | 1.00  | 0.00 | 4.00   | 1.00    | 0.00 | 1.00 | 1.00   | 1.00     |
| 0.00   | 1.00  | 0.00 | 9.00   | 2.00    | 0.00 | 1.00 | 1.00   | 1.00     |
| 0.00   | 1.00  | 0.00 | 9.00   | 2.00    | 0.00 | 1.00 | 1.00   | 1.00     |
| 0.00   | 0.00  | 0.00 | 3.00   | 1.00    | 0.00 | 1.00 | 1.00   | 1.00     |
| 0.00   | 0.00  | 0.00 | 5.00   | 1.00    | 0.00 | 1.00 | 1.00   | 1.00     |
| 0.00   | 1.00  | 0.00 | 6.00   | 1.00    | 0.00 | 1.00 | 1.00   | 1.00     |
| 0.00   | 0.00  | 0.00 | 3.00   | 1.00    | 1.00 | 1.00 | 1.00   | 1.00     |
| 0.00   | 0.00  | 0.00 | 2.00   | 1.00    | 0.00 | 1.00 | 1.00   | 1.00     |
| 0.00   | 0.00  | 0.00 | 8.00   | 2.00    | 0.00 | 1.00 | 0.00   | 0.00     |
| 0.00   | 0.00  | 0.00 | 5.00   | 1.00    | 0.00 | 1.00 | 0.00   | 0.00     |
| 0.00   | 0.00  | 0.00 | 7.00   | 2.00    | 0.00 | 1.00 | 1.00   | 1.00     |
| 0.00   | 0.00  | 0.00 | 9.00   | 2.00    | 0.00 | 1.00 | 0.00   | 0.00     |
| 0.00   | 0.00  | 0.00 | 5.00   | 1.00    | 0.00 | 1.00 | 1.00   | 1.00     |
| 0.00   | 0.00  | 0.00 | 6.00   | 1.00    | 0.00 | 1.00 | 1.00   | 1.00     |
| 0.00   | 0.00  | 0.00 | 7.00   | 2.00    | 1.00 | 1.00 | 1.00   | 1.00     |
| 0.00   | 1.00  | 0.00 | 8.00   | 2.00    | 1.00 | 1.00 | 1.00   | 1.00     |
| 0.00   | 1.00  | 0.00 | 8.00   | 2.00    | 0.00 | 1.00 | 1.00   | 1.00     |
| 0.00   | 1.00  | 0.00 | 4.00   | 1.00    | 0.00 | 1.00 | 1.00   | 1.00     |
| 0.00   | 1.00  | 0.00 | 7.00   | 2.00    | 0.00 | 1.00 | 1.00   | 1.00     |

|      |      |      |       |      |      |      |      |      |
|------|------|------|-------|------|------|------|------|------|
| 0.00 | 1.00 | 0.00 | 4.00  | 1.00 | 0.00 | 1.00 | 1.00 | 1.00 |
| 0.00 | 1.00 | 0.00 | 3.00  | 1.00 | 0.00 | 1.00 | 1.00 | 1.00 |
| 0.00 | 1.00 | 0.00 | 3.00  | 1.00 | 0.00 | 1.00 | 1.00 | 1.00 |
| 0.00 | 0.00 | 0.00 | 2.00  | 1.00 | 0.00 | 1.00 | 1.00 | 1.00 |
| 0.00 | 0.00 | 0.00 | 2.00  | 1.00 | 0.00 | 1.00 | 1.00 | 1.00 |
| 1.00 | 1.00 | 0.00 | 18.00 | 2.00 | 0.00 | 1.00 | 1.00 | 1.00 |
| 0.00 | 0.00 | 0.00 | 4.00  | 1.00 | 0.00 | 1.00 | 1.00 | 1.00 |
| 1.00 | 0.00 | 0.00 | 4.00  | 1.00 | 0.00 | 1.00 | 0.00 | 0.00 |
| 0.00 | 0.00 | 0.00 | 5.00  | 1.00 | 0.00 | 1.00 | 1.00 | 1.00 |
| 0.00 | 0.00 | 0.00 | 1.00  | 1.00 | 0.00 | 1.00 | 1.00 | 1.00 |
| 2.00 | 0.00 | 0.00 | 6.00  | 1.00 | 0.00 | 0.00 | 0.00 | 0.00 |
| 0.00 | 0.00 | 0.00 | 4.00  | 1.00 | 0.00 | 0.00 | 1.00 | 0.00 |
| 0.00 | 0.00 | 0.00 | 3.00  | 1.00 | 0.00 | 0.00 | 1.00 | 0.00 |
| 1.00 | 0.00 | 1.00 | 14.00 | 2.00 | 0.00 | 0.00 | 0.00 | 0.00 |
| 0.00 | 0.00 | 0.00 | 4.00  | 1.00 | 1.00 | 0.00 | 0.00 | 0.00 |
| 2.00 | 0.00 | 0.00 | 5.00  | 1.00 | 0.00 | 1.00 | 1.00 | 1.00 |
| 0.00 | 0.00 | 0.00 | 4.00  | 1.00 | 0.00 | 0.00 | 1.00 | 0.00 |
| 0.00 | 1.00 | 0.00 | 4.00  | 1.00 | 0.00 | 1.00 | 0.00 | 0.00 |
| 0.00 | 0.00 | 0.00 | 2.00  | 1.00 | 0.00 | 1.00 | 1.00 | 1.00 |
| 0.00 | 0.00 | 0.00 | 4.00  | 1.00 | 1.00 | 1.00 | 1.00 | 1.00 |
| 0.00 | 0.00 | 0.00 | 4.00  | 1.00 | 0.00 | 1.00 | 0.00 | 0.00 |
| 0.00 | 0.00 | 0.00 | 3.00  | 1.00 | 0.00 | 1.00 | 1.00 | 1.00 |
| 0.00 | 0.00 | 0.00 | 4.00  | 1.00 | 0.00 | 1.00 | 1.00 | 1.00 |
| 0.00 | 0.00 | 0.00 | 3.00  | 1.00 | 0.00 | 1.00 | 1.00 | 1.00 |
| 0.00 | 0.00 | 0.00 | 3.00  | 1.00 | 0.00 | 1.00 | 1.00 | 1.00 |
| 0.00 | 0.00 | 0.00 | 4.00  | 1.00 | 0.00 | 1.00 | 1.00 | 1.00 |
| 0.00 | 0.00 | 0.00 | 4.00  | 1.00 | 0.00 | 1.00 | 1.00 | 1.00 |
| 1.00 | 1.00 | 0.00 | 7.00  | 2.00 | 0.00 | 1.00 | 1.00 | 1.00 |
| 0.00 | 1.00 | 0.00 | 6.00  | 1.00 | 0.00 | 1.00 | 1.00 | 1.00 |
| 0.00 | 0.00 | 1.00 | 4.00  | 1.00 | 0.00 | 1.00 | 1.00 | 1.00 |
| 0.00 | 0.00 | 0.00 | 2.00  | 1.00 | 0.00 | 0.00 | 1.00 | 0.00 |
| 0.00 | 0.00 | 0.00 | 6.00  | 1.00 | 0.00 | 1.00 | 1.00 | 1.00 |
| 0.00 | 0.00 | 0.00 | 6.00  | 1.00 | 0.00 | 1.00 | 0.00 | 0.00 |
| 0.00 | 0.00 | 0.00 | 2.00  | 1.00 | 0.00 | 1.00 | 1.00 | 1.00 |
| 0.00 | 0.00 | 0.00 | 1.00  | 1.00 | 0.00 | 1.00 | 1.00 | 1.00 |
| 0.00 | 0.00 | 0.00 | 4.00  | 1.00 | 0.00 | 1.00 | 0.00 | 0.00 |
| 2.00 | 1.00 | 0.00 | 8.00  | 2.00 | 0.00 | 1.00 | 0.00 | 0.00 |
| 1.00 | 1.00 | 1.00 | 13.00 | 2.00 | 0.00 | 1.00 | 1.00 | 1.00 |
| 0.00 | 0.00 | 0.00 | 4.00  | 1.00 | 1.00 | 0.00 | 0.00 | 0.00 |
| 0.00 | 1.00 | 0.00 | 7.00  | 2.00 | 0.00 | 1.00 | 1.00 | 1.00 |
| 0.00 | 0.00 | 0.00 | 4.00  | 1.00 | 0.00 | 1.00 | 1.00 | 1.00 |
| 0.00 | 0.00 | 0.00 | 5.00  | 1.00 | 1.00 | 1.00 | 1.00 | 1.00 |
| 0.00 | 1.00 | 0.00 | 5.00  | 1.00 | 0.00 | 1.00 | 1.00 | 1.00 |
| 0.00 | 0.00 | 0.00 | 4.00  | 1.00 | 0.00 | 0.00 | 1.00 | 0.00 |
| 0.00 | 0.00 | 0.00 | 3.00  | 1.00 | 0.00 | 1.00 | 1.00 | 1.00 |
| 0.00 | 0.00 | 0.00 | 2.00  | 1.00 | 0.00 | 0.00 | 1.00 | 0.00 |
| 0.00 | 0.00 | 0.00 | 4.00  | 1.00 | 0.00 | 1.00 | 1.00 | 1.00 |



|      |      |      |       |      |      |      |      |      |
|------|------|------|-------|------|------|------|------|------|
| 0.00 | 1.00 | 0.00 | 6.00  | 1.00 | 0.00 | 1.00 | 1.00 | 1.00 |
| 0.00 | 1.00 | 0.00 | 9.00  | 2.00 | 1.00 | 1.00 | 1.00 | 1.00 |
| 1.00 | 1.00 | 0.00 | 5.00  | 1.00 | 0.00 | 1.00 | 1.00 | 1.00 |
| 1.00 | 1.00 | 0.00 | 13.00 | 2.00 | 0.00 | 0.00 | 0.00 | 0.00 |
| 2.00 | 1.00 | 0.00 | 15.00 | 2.00 | 0.00 | 1.00 | 1.00 | 1.00 |
| 0.00 | 1.00 | 1.00 | 14.00 | 2.00 | 0.00 | 1.00 | 1.00 | 1.00 |
| 0.00 | 0.00 | 0.00 | 5.00  | 1.00 | 0.00 | 1.00 | 1.00 | 1.00 |
| 2.00 | 0.00 | 0.00 | 12.00 | 2.00 | 0.00 | 1.00 | 1.00 | 1.00 |
| 2.00 | 1.00 | 0.00 | 10.00 | 2.00 | 0.00 | 1.00 | 0.00 | 0.00 |
| 0.00 | 1.00 | 0.00 | 12.00 | 2.00 | 0.00 | 0.00 | 0.00 | 0.00 |
| 0.00 | 1.00 | 0.00 | 13.00 | 2.00 | 0.00 | 1.00 | 1.00 | 1.00 |
| 2.00 | 1.00 | 0.00 | 15.00 | 2.00 | 0.00 | 1.00 | 1.00 | 1.00 |
| 0.00 | 0.00 | 0.00 | 6.00  | 1.00 | 0.00 | 0.00 | 0.00 | 0.00 |
| 0.00 | 0.00 | 0.00 | 4.00  | 1.00 | 0.00 | 1.00 | 0.00 | 0.00 |
| 0.00 | 0.00 | 0.00 | 4.00  | 1.00 | 0.00 | 1.00 | 0.00 | 0.00 |
| 0.00 | 0.00 | 0.00 | 3.00  | 1.00 | 0.00 | 1.00 | 1.00 | 1.00 |
| 0.00 | 0.00 | 0.00 | 2.00  | 1.00 | 0.00 | 1.00 | 0.00 | 0.00 |
| 0.00 | 1.00 | 0.00 | 11.00 | 2.00 | 0.00 | 1.00 | 1.00 | 1.00 |
| 0.00 | 0.00 | 0.00 | 4.00  | 1.00 | 0.00 | 1.00 | 1.00 | 1.00 |
| 0.00 | 0.00 | 0.00 | 3.00  | 1.00 | 0.00 | 1.00 | 0.00 | 0.00 |
| 0.00 | 0.00 | 1.00 | 4.00  | 1.00 | 0.00 | 1.00 | 0.00 | 0.00 |
| 0.00 | 1.00 | 0.00 | 5.00  | 1.00 | 0.00 | 0.00 | 0.00 | 0.00 |
| 0.00 | 0.00 | 0.00 | 3.00  | 1.00 | 0.00 | 0.00 | 0.00 | 0.00 |
| 0.00 | 0.00 | 0.00 | 7.00  | 2.00 | 0.00 | 1.00 | 0.00 | 0.00 |
| 0.00 | 1.00 | 0.00 | 7.00  | 2.00 | 0.00 | 1.00 | 0.00 | 0.00 |
| 0.00 | 0.00 | 0.00 | 3.00  | 1.00 | 0.00 | 1.00 | 1.00 | 1.00 |
| 0.00 | 0.00 | 0.00 | 7.00  | 2.00 | 0.00 | 0.00 | 0.00 | 0.00 |
| 0.00 | 0.00 | 0.00 | 5.00  | 1.00 | 0.00 | 0.00 | 1.00 | 0.00 |
| 0.00 | 0.00 | 0.00 | 2.00  | 1.00 | 0.00 | 1.00 | 0.00 | 0.00 |
| 0.00 | 0.00 | 0.00 | 2.00  | 1.00 | 0.00 | 1.00 | 1.00 | 1.00 |
| 0.00 | 0.00 | 0.00 | 3.00  | 1.00 | 0.00 | 1.00 | 1.00 | 1.00 |
| 0.00 | 0.00 | 0.00 | 5.00  | 1.00 | 0.00 | 1.00 | 1.00 | 1.00 |
| 0.00 | 0.00 | 0.00 | 2.00  | 1.00 | 0.00 | 1.00 | 1.00 | 1.00 |
| 0.00 | 0.00 | 0.00 | 2.00  | 1.00 | 0.00 | 1.00 | 1.00 | 1.00 |
| 0.00 | 0.00 | 0.00 | 1.00  | 1.00 | 0.00 | 1.00 | 1.00 | 1.00 |
| 0.00 | 0.00 | 0.00 | 4.00  | 1.00 | 0.00 | 1.00 | 1.00 | 1.00 |
| 0.00 | 0.00 | 0.00 | 3.00  | 1.00 | 0.00 | 1.00 | 1.00 | 1.00 |
| 0.00 | 0.00 | 0.00 | 5.00  | 1.00 | 0.00 | 1.00 | 1.00 | 1.00 |
| 0.00 | 0.00 | 0.00 | 5.00  | 1.00 | 0.00 | 1.00 | 0.00 | 0.00 |
| 0.00 | 1.00 | 0.00 | 8.00  | 2.00 | 0.00 | 1.00 | 1.00 | 1.00 |
| 0.00 | 0.00 | 0.00 | 3.00  | 1.00 | 0.00 | 1.00 | 1.00 | 1.00 |
| 0.00 | 0.00 | 0.00 | 5.00  | 1.00 | 0.00 | 1.00 | 1.00 | 1.00 |
| 0.00 | 0.00 | 0.00 | 1.00  | 1.00 | 0.00 | 1.00 | 1.00 | 1.00 |
| 0.00 | 0.00 | 0.00 | 1.00  | 1.00 | 0.00 | 0.00 | 0.00 | 0.00 |
| 0.00 | 0.00 | 0.00 | 6.00  | 1.00 | 0.00 | 1.00 | 1.00 | 1.00 |
| 0.00 | 0.00 | 0.00 | 3.00  | 1.00 | 0.00 | 1.00 | 1.00 | 1.00 |
| 0.00 | 0.00 | 0.00 | 3.00  | 1.00 | 0.00 | 1.00 | 1.00 | 1.00 |



|      |      |      |       |      |      |      |      |      |
|------|------|------|-------|------|------|------|------|------|
| 0.00 | 1.00 | 0.00 | 8.00  | 2.00 | 0.00 | 1.00 | 0.00 | 0.00 |
| 0.00 | 1.00 | 0.00 | 6.00  | 1.00 | 0.00 | 1.00 | 1.00 | 1.00 |
| 0.00 | 0.00 | 0.00 | 2.00  | 1.00 | 0.00 | 0.00 | 0.00 | 0.00 |
| 0.00 | 1.00 | 0.00 | 13.00 | 2.00 | 0.00 | 1.00 | 0.00 | 0.00 |
| 0.00 | 1.00 | 0.00 | 7.00  | 2.00 | 1.00 | 1.00 | 1.00 | 1.00 |
| 0.00 | 0.00 | 0.00 | 1.00  | 1.00 | 0.00 | 1.00 | 1.00 | 1.00 |
| 0.00 | 0.00 | 0.00 | 4.00  | 1.00 | 0.00 | 1.00 | 1.00 | 1.00 |
| 0.00 | 1.00 | 0.00 | 8.00  | 2.00 | 0.00 | 1.00 | 1.00 | 1.00 |
| 0.00 | 0.00 | 0.00 | 7.00  | 2.00 | 0.00 | 1.00 | 1.00 | 1.00 |
| 0.00 | 0.00 | 0.00 | 4.00  | 1.00 | 0.00 | 1.00 | 0.00 | 0.00 |
| 0.00 | 0.00 | 0.00 | 3.00  | 1.00 | 1.00 | 1.00 | 1.00 | 1.00 |
| 0.00 | 0.00 | 0.00 | 6.00  | 1.00 | 1.00 | 1.00 | 1.00 | 1.00 |
| 0.00 | 0.00 | 0.00 | 6.00  | 1.00 | 0.00 | 1.00 | 0.00 | 0.00 |
| 0.00 | 0.00 | 0.00 | 3.00  | 1.00 | 0.00 | 1.00 | 1.00 | 1.00 |
| 0.00 | 0.00 | 0.00 | 4.00  | 1.00 | 0.00 | 1.00 | 1.00 | 1.00 |
| 0.00 | 0.00 | 0.00 | 2.00  | 1.00 | 0.00 | 1.00 | 1.00 | 1.00 |
| 0.00 | 0.00 | 0.00 | 5.00  | 1.00 | 0.00 | 1.00 | 1.00 | 1.00 |
| 0.00 | 1.00 | 0.00 | 6.00  | 1.00 | 0.00 | 1.00 | 1.00 | 1.00 |
| 0.00 | 0.00 | 0.00 | 5.00  | 1.00 | 0.00 | 1.00 | 1.00 | 1.00 |
| 0.00 | 0.00 | 0.00 | 2.00  | 1.00 | 0.00 | 1.00 | 1.00 | 1.00 |
| 0.00 | 1.00 | 0.00 | 3.00  | 1.00 | 0.00 | 1.00 | 1.00 | 1.00 |
| 0.00 | 0.00 | 0.00 | 5.00  | 1.00 | 0.00 | 1.00 | 1.00 | 1.00 |
| 0.00 | 0.00 | 0.00 | 4.00  | 1.00 | 0.00 | 1.00 | 1.00 | 1.00 |
| 0.00 | 0.00 | 0.00 | 3.00  | 1.00 | 0.00 | 1.00 | 1.00 | 1.00 |
| 0.00 | 1.00 | 0.00 | 11.00 | 2.00 | 0.00 | 1.00 | 1.00 | 1.00 |
| 0.00 | 1.00 | 1.00 | 14.00 | 2.00 | 0.00 | 1.00 | 0.00 | 0.00 |
| 1.00 | 1.00 | 0.00 | 11.00 | 2.00 | 1.00 | 0.00 | 0.00 | 0.00 |
| 0.00 | 1.00 | 0.00 | 10.00 | 2.00 | 0.00 | 1.00 | 1.00 | 1.00 |
| 1.00 | 1.00 | 1.00 | 15.00 | 2.00 | 0.00 | 1.00 | 1.00 | 1.00 |
| 1.00 | 1.00 | 0.00 | 15.00 | 2.00 | 0.00 | 1.00 | 1.00 | 1.00 |
| 0.00 | 1.00 | 0.00 | 7.00  | 2.00 | 0.00 | 1.00 | 1.00 | 1.00 |
| 0.00 | 1.00 | 1.00 | 13.00 | 2.00 | 0.00 | 1.00 | 1.00 | 1.00 |
| 0.00 | 0.00 | 0.00 | 2.00  | 1.00 | 0.00 | 1.00 | 0.00 | 0.00 |
| 2.00 | 1.00 | 0.00 | 16.00 | 2.00 | 0.00 | 1.00 | 1.00 | 1.00 |
| 0.00 | 0.00 | 0.00 | 4.00  | 1.00 | 0.00 | 1.00 | 1.00 | 1.00 |
| 0.00 | 0.00 | 0.00 | 2.00  | 1.00 | 1.00 | 1.00 | 1.00 | 1.00 |
| 0.00 | 1.00 | 0.00 | 7.00  | 2.00 | 0.00 | 1.00 | 1.00 | 1.00 |
| 0.00 | 0.00 | 0.00 | 1.00  | 1.00 | 0.00 | 1.00 | 1.00 | 1.00 |
| 0.00 | 0.00 | 0.00 | 1.00  | 1.00 | 0.00 | 1.00 | 1.00 | 1.00 |
| 0.00 | 0.00 | 0.00 | 2.00  | 1.00 | 1.00 | 1.00 | 1.00 | 1.00 |
| 0.00 | 0.00 | 0.00 | 4.00  | 1.00 | 0.00 | 1.00 | 1.00 | 1.00 |
| 0.00 | 0.00 | 0.00 | 3.00  | 1.00 | 0.00 | 1.00 | 1.00 | 1.00 |
| 1.00 | 1.00 | 0.00 | 7.00  | 2.00 | 0.00 | 1.00 | 1.00 | 1.00 |
| 0.00 | 0.00 | 0.00 | 4.00  | 1.00 | 0.00 | 1.00 | 1.00 | 1.00 |
| 0.00 | 0.00 | 0.00 | 2.00  | 1.00 | 0.00 | 1.00 | 1.00 | 1.00 |
| 0.00 | 0.00 | 1.00 | 2.00  | 1.00 | 0.00 | 1.00 | 1.00 | 1.00 |
| 0.00 | 0.00 | 0.00 | 1.00  | 1.00 | 0.00 | 1.00 | 1.00 | 1.00 |

|      |      |      |       |      |      |      |      |      |
|------|------|------|-------|------|------|------|------|------|
| 1.00 | 0.00 | 0.00 | 6.00  | 1.00 | 0.00 | 1.00 | 1.00 | 1.00 |
| 0.00 | 0.00 | 0.00 | 5.00  | 1.00 | 0.00 | 1.00 | 1.00 | 1.00 |
| 0.00 | 0.00 | 0.00 | 2.00  | 1.00 | 0.00 | 1.00 | 1.00 | 1.00 |
| 0.00 | 0.00 | 0.00 | 7.00  | 2.00 | 1.00 | 1.00 | 1.00 | 1.00 |
| 0.00 | 0.00 | 0.00 | 1.00  | 1.00 | 0.00 | 1.00 | 1.00 | 1.00 |
| 0.00 | 0.00 | 0.00 | 4.00  | 1.00 | 0.00 | 1.00 | 1.00 | 1.00 |
| 0.00 | 0.00 | 0.00 | 2.00  | 1.00 | 0.00 | 1.00 | 1.00 | 1.00 |
| 0.00 | 0.00 | 0.00 | 1.00  | 1.00 | 1.00 | 1.00 | 1.00 | 1.00 |
| 0.00 | 1.00 | 0.00 | 11.00 | 2.00 | 0.00 | 1.00 | 1.00 | 1.00 |
| 0.00 | 1.00 | 1.00 | 13.00 | 2.00 | 0.00 | 1.00 | 1.00 | 1.00 |
| 1.00 | 1.00 | 0.00 | 12.00 | 2.00 | 0.00 | 1.00 | 1.00 | 1.00 |
| 0.00 | 0.00 | 0.00 | 8.00  | 2.00 | 0.00 | 1.00 | 1.00 | 1.00 |
| 2.00 | 1.00 | 1.00 | 17.00 | 2.00 | 0.00 | 1.00 | 0.00 | 0.00 |
| 0.00 | 1.00 | 0.00 | 6.00  | 1.00 | 0.00 | 1.00 | 1.00 | 1.00 |
| 0.00 | 0.00 | 0.00 | 5.00  | 1.00 | 0.00 | 1.00 | 1.00 | 1.00 |
| 1.00 | 1.00 | 0.00 | 13.00 | 2.00 | 0.00 | 1.00 | 1.00 | 1.00 |
| 0.00 | 0.00 | 0.00 | 1.00  | 1.00 | 0.00 | 1.00 | 1.00 | 1.00 |
| 0.00 | 0.00 | 0.00 | 7.00  | 2.00 | 1.00 | 1.00 | 1.00 | 1.00 |
| 0.00 | 0.00 | 0.00 | 7.00  | 2.00 | 0.00 | 1.00 | 1.00 | 1.00 |
| 0.00 | 1.00 | 0.00 | 8.00  | 2.00 | 0.00 | 1.00 | 1.00 | 1.00 |
| 0.00 | 0.00 | 0.00 | 4.00  | 1.00 | 0.00 | 1.00 | 1.00 | 1.00 |
| 0.00 | 0.00 | 0.00 | 1.00  | 1.00 | 0.00 | 1.00 | 0.00 | 0.00 |
| 0.00 | 0.00 | 0.00 | 4.00  | 1.00 | 1.00 | 1.00 | 0.00 | 0.00 |
| 0.00 | 0.00 | 0.00 | 1.00  | 1.00 | 0.00 | 1.00 | 1.00 | 1.00 |
| 1.00 | 0.00 | 0.00 | 3.00  | 1.00 | 1.00 | 1.00 | 1.00 | 1.00 |
| 0.00 | 0.00 | 0.00 | 3.00  | 1.00 | 0.00 | 1.00 | 0.00 | 0.00 |
| 0.00 | 0.00 | 0.00 | 3.00  | 1.00 | 0.00 | 0.00 | 1.00 | 0.00 |
| 0.00 | 0.00 | 0.00 | 5.00  | 1.00 | 1.00 | 1.00 | 0.00 | 0.00 |
| 0.00 | 0.00 | 0.00 | 1.00  | 1.00 | 0.00 | 1.00 | 1.00 | 1.00 |
| 0.00 | 0.00 | 0.00 | 2.00  | 1.00 | 0.00 | 0.00 | 0.00 | 0.00 |
| 0.00 | 0.00 | 0.00 | 2.00  | 1.00 | 0.00 | 1.00 | 1.00 | 1.00 |
| 0.00 | 0.00 | 0.00 | 5.00  | 1.00 | 1.00 | 1.00 | 1.00 | 1.00 |
| 0.00 | 0.00 | 0.00 | 2.00  | 1.00 | 0.00 | 1.00 | 1.00 | 1.00 |
| 0.00 | 0.00 | 0.00 | 3.00  | 1.00 | 0.00 | 1.00 | 1.00 | 1.00 |
| 0.00 | 0.00 | 0.00 | 6.00  | 1.00 | 0.00 | 1.00 | 1.00 | 1.00 |
| 0.00 | 0.00 | 0.00 | 8.00  | 2.00 | 0.00 | 1.00 | 1.00 | 1.00 |
| 0.00 | 0.00 | 0.00 | 3.00  | 1.00 | 0.00 | 1.00 | 1.00 | 1.00 |
| 0.00 | 1.00 | 0.00 | 9.00  | 2.00 | 0.00 | 1.00 | 1.00 | 1.00 |
| 0.00 | 1.00 | 0.00 | 13.00 | 2.00 | 0.00 | 1.00 | 1.00 | 1.00 |
| 0.00 | 0.00 | 0.00 | 6.00  | 1.00 | 0.00 | 1.00 | 1.00 | 1.00 |
| 1.00 | 1.00 | 0.00 | 10.00 | 2.00 | 0.00 | 1.00 | 1.00 | 1.00 |
| 1.00 | 1.00 | 1.00 | 15.00 | 2.00 | 0.00 | 1.00 | 1.00 | 1.00 |
| 0.00 | 0.00 | 0.00 | 2.00  | 1.00 | 0.00 | 0.00 | 0.00 | 0.00 |
| 1.00 | 1.00 | 0.00 | 12.00 | 2.00 | 0.00 | 1.00 | 1.00 | 1.00 |
| 1.00 | 0.00 | 0.00 | 4.00  | 1.00 | 0.00 | 1.00 | 1.00 | 1.00 |
| 0.00 | 0.00 | 0.00 | 5.00  | 1.00 | 0.00 | 1.00 | 1.00 | 1.00 |
| 0.00 | 0.00 | 0.00 | 3.00  | 1.00 | 0.00 | 1.00 | 0.00 | 0.00 |

|      |      |      |       |      |      |      |      |      |
|------|------|------|-------|------|------|------|------|------|
| 2.00 | 1.00 | 0.00 | 16.00 | 2.00 | 0.00 | 1.00 | 1.00 | 1.00 |
| 0.00 | 0.00 | 0.00 | 1.00  | 1.00 | 0.00 | 1.00 | 1.00 | 1.00 |
| 0.00 | 1.00 | 0.00 | 12.00 | 2.00 | 0.00 | 1.00 | 1.00 | 1.00 |
| 2.00 | 1.00 | 0.00 | 17.00 | 2.00 | 0.00 | 1.00 | 1.00 | 1.00 |
| 0.00 | 0.00 | 0.00 | 6.00  | 1.00 | 0.00 | 1.00 | 1.00 | 1.00 |
| 1.00 | 0.00 | 0.00 | 4.00  | 1.00 | 0.00 | 1.00 | 1.00 | 1.00 |
| 0.00 | 1.00 | 0.00 | 8.00  | 2.00 | 1.00 | 1.00 | 0.00 | 0.00 |
| 0.00 | 1.00 | 0.00 | 5.00  | 1.00 | 0.00 | 1.00 | 1.00 | 1.00 |
| 0.00 | 1.00 | 0.00 | 14.00 | 2.00 | 0.00 | 1.00 | 0.00 | 0.00 |
| 0.00 | 0.00 | 0.00 | 5.00  | 1.00 | 0.00 | 1.00 | 1.00 | 1.00 |
| 0.00 | 1.00 | 0.00 | 13.00 | 2.00 | 0.00 | 1.00 | 1.00 | 1.00 |
| 1.00 | 0.00 | 0.00 | 5.00  | 1.00 | 0.00 | 1.00 | 1.00 | 1.00 |
| 0.00 | 0.00 | 0.00 | 5.00  | 1.00 | 0.00 | 1.00 | 1.00 | 1.00 |
| 2.00 | 0.00 | 0.00 | 9.00  | 2.00 | 0.00 | 1.00 | 1.00 | 1.00 |
| 0.00 | 1.00 | 0.00 | 5.00  | 1.00 | 0.00 | 1.00 | 0.00 | 0.00 |
| 2.00 | 1.00 | 0.00 | 12.00 | 2.00 | 0.00 | 1.00 | 1.00 | 1.00 |
| 1.00 | 1.00 | 1.00 | 14.00 | 2.00 | 0.00 | 1.00 | 0.00 | 0.00 |
| 0.00 | 0.00 | 0.00 | 6.00  | 1.00 | 0.00 | 1.00 | 1.00 | 1.00 |
| 1.00 | 1.00 | 0.00 | 11.00 | 2.00 | 0.00 | 1.00 | 1.00 | 1.00 |
| 0.00 | 0.00 | 0.00 | 5.00  | 1.00 | 0.00 | 1.00 | 1.00 | 1.00 |
| 0.00 | 0.00 | 0.00 | 8.00  | 2.00 | 0.00 | 1.00 | 1.00 | 1.00 |
| 1.00 | 1.00 | 0.00 | 14.00 | 2.00 | 0.00 | 1.00 | 1.00 | 1.00 |
| 1.00 | 1.00 | 0.00 | 14.00 | 2.00 | 0.00 | 1.00 | 1.00 | 1.00 |
| 0.00 | 0.00 | 0.00 | 10.00 | 2.00 | 0.00 | 1.00 | 1.00 | 1.00 |
| 0.00 | 0.00 | 0.00 | 3.00  | 1.00 | 0.00 | 1.00 | 1.00 | 1.00 |
| 0.00 | 0.00 | 0.00 | 5.00  | 1.00 | 0.00 | 1.00 | 0.00 | 0.00 |
| 0.00 | 0.00 | 0.00 | 2.00  | 1.00 | 0.00 | 1.00 | 1.00 | 1.00 |
| 0.00 | 0.00 | 0.00 | 3.00  | 1.00 | 0.00 | 1.00 | 1.00 | 1.00 |
| 2.00 | 1.00 | 1.00 | 16.00 | 2.00 | 0.00 | 1.00 | 1.00 | 1.00 |
| 0.00 | 1.00 | 0.00 | 8.00  | 2.00 | 0.00 | 0.00 | 0.00 | 0.00 |
| 2.00 | 1.00 | 0.00 | 14.00 | 2.00 | 0.00 | 1.00 | 1.00 | 1.00 |
| 0.00 | 1.00 | 0.00 | 12.00 | 2.00 | 0.00 | 1.00 | 1.00 | 1.00 |
| 2.00 | 1.00 | 1.00 | 16.00 | 2.00 | 0.00 | 1.00 | 1.00 | 1.00 |
| 0.00 | 1.00 | 0.00 | 11.00 | 2.00 | 0.00 | 1.00 | 1.00 | 1.00 |
| 0.00 | 0.00 | 0.00 | 5.00  | 1.00 | 1.00 | 1.00 | 1.00 | 1.00 |
| 0.00 | 0.00 | 0.00 | 3.00  | 1.00 | 0.00 | 1.00 | 1.00 | 1.00 |
| 0.00 | 0.00 | 0.00 | 8.00  | 2.00 | 0.00 | 1.00 | 1.00 | 1.00 |
| 0.00 | 0.00 | 0.00 | 3.00  | 1.00 | 0.00 | 1.00 | 1.00 | 1.00 |
| 0.00 | 0.00 | 0.00 | 3.00  | 1.00 | 0.00 | 1.00 | 1.00 | 1.00 |
| 0.00 | 0.00 | 0.00 | 6.00  | 1.00 | 0.00 | 1.00 | 1.00 | 1.00 |
| 0.00 | 0.00 | 0.00 | 3.00  | 1.00 | 0.00 | 1.00 | 1.00 | 1.00 |
| 0.00 | 1.00 | 0.00 | 10.00 | 2.00 | 0.00 | 1.00 | 1.00 | 1.00 |
| 0.00 | 1.00 | 0.00 | 10.00 | 2.00 | 0.00 | 1.00 | 1.00 | 1.00 |
| 0.00 | 0.00 | 0.00 | 4.00  | 1.00 | 0.00 | 1.00 | 1.00 | 1.00 |
| 1.00 | 0.00 | 0.00 | 8.00  | 2.00 | 0.00 | 1.00 | 1.00 | 1.00 |
| 0.00 | 1.00 | 0.00 | 6.00  | 1.00 | 0.00 | 1.00 | 1.00 | 1.00 |
| 0.00 | 0.00 | 0.00 | 4.00  | 1.00 | 0.00 | 1.00 | 1.00 | 1.00 |

|      |      |      |       |      |      |      |      |      |
|------|------|------|-------|------|------|------|------|------|
| 0.00 | 0.00 | 0.00 | 1.00  | 1.00 | 0.00 | 1.00 | 1.00 | 1.00 |
| 0.00 | 0.00 | 0.00 | 3.00  | 1.00 | 0.00 | 1.00 | 1.00 | 1.00 |
| 0.00 | 1.00 | 0.00 | 13.00 | 2.00 | 0.00 | 1.00 | 1.00 | 1.00 |
| 0.00 | 0.00 | 0.00 | 5.00  | 1.00 | 0.00 | 1.00 | 1.00 | 1.00 |
| 0.00 | 1.00 | 0.00 | 5.00  | 1.00 | 0.00 | 1.00 | 1.00 | 1.00 |
| 0.00 | 1.00 | 0.00 | 3.00  | 1.00 | 0.00 | 1.00 | 1.00 | 1.00 |
| 1.00 | 1.00 | 1.00 | 16.00 | 2.00 | 0.00 | 1.00 | 1.00 | 1.00 |
| 0.00 | 1.00 | 0.00 | 13.00 | 2.00 | 0.00 | 1.00 | 1.00 | 1.00 |
| 0.00 | 0.00 | 0.00 | 5.00  | 1.00 | 0.00 | 1.00 | 1.00 | 1.00 |
| 0.00 | 1.00 | 0.00 | 6.00  | 1.00 | 0.00 | 1.00 | 1.00 | 1.00 |
| 0.00 | 1.00 | 0.00 | 8.00  | 2.00 | 0.00 | 1.00 | 1.00 | 1.00 |
| 0.00 | 1.00 | 0.00 | 10.00 | 2.00 | 0.00 | 1.00 | 1.00 | 1.00 |
| 0.00 | 0.00 | 0.00 | 1.00  | 1.00 | 0.00 | 1.00 | 1.00 | 1.00 |
| 0.00 | 1.00 | 0.00 | 7.00  | 2.00 | 0.00 | 1.00 | 1.00 | 1.00 |
| 0.00 | 0.00 | 0.00 | 4.00  | 1.00 | 0.00 | 1.00 | 1.00 | 1.00 |
| 0.00 | 0.00 | 0.00 | 7.00  | 2.00 | 0.00 | 1.00 | 1.00 | 1.00 |
| 0.00 | 1.00 | 0.00 | 10.00 | 2.00 | 0.00 | 1.00 | 1.00 | 1.00 |
| 0.00 | 1.00 | 0.00 | 11.00 | 2.00 | 0.00 | 1.00 | 1.00 | 1.00 |
| 0.00 | 0.00 | 0.00 | 4.00  | 1.00 | 0.00 | 1.00 | 1.00 | 1.00 |
| 0.00 | 0.00 | 0.00 | 4.00  | 1.00 | 0.00 | 1.00 | 1.00 | 1.00 |
| 0.00 | 0.00 | 0.00 | 4.00  | 1.00 | 0.00 | 1.00 | 1.00 | 1.00 |
| 0.00 | 1.00 | 0.00 | 12.00 | 2.00 | 0.00 | 1.00 | 1.00 | 1.00 |
| 0.00 | 1.00 | 0.00 | 12.00 | 2.00 | 0.00 | 1.00 | 1.00 | 1.00 |
| 0.00 | 1.00 | 0.00 | 13.00 | 2.00 | 0.00 | 1.00 | 1.00 | 1.00 |
| 0.00 | 1.00 | 0.00 | 10.00 | 2.00 | 0.00 | 1.00 | 1.00 | 1.00 |
| 2.00 | 1.00 | 1.00 | 17.00 | 2.00 | 0.00 | 1.00 | 1.00 | 1.00 |
| 0.00 | 0.00 | 0.00 | 7.00  | 2.00 | 0.00 | 1.00 | 1.00 | 1.00 |
| 1.00 | 1.00 | 0.00 | 15.00 | 2.00 | 0.00 | 1.00 | 1.00 | 1.00 |
| 0.00 | 1.00 | 0.00 | 12.00 | 2.00 | 0.00 | 1.00 | 1.00 | 1.00 |
| 2.00 | 1.00 | 1.00 | 17.00 | 2.00 | 1.00 | 1.00 | 1.00 | 1.00 |
| 2.00 | 1.00 | 0.00 | 14.00 | 2.00 | 0.00 | 1.00 | 1.00 | 1.00 |
| 2.00 | 1.00 | 1.00 | 15.00 | 2.00 | 0.00 | 1.00 | 0.00 | 0.00 |
| 0.00 | 0.00 | 0.00 | 7.00  | 2.00 | 0.00 | 0.00 | 1.00 | 0.00 |
| 0.00 | 0.00 | 0.00 | 5.00  | 1.00 | 0.00 | 1.00 | 0.00 | 0.00 |
| 1.00 | 1.00 | 1.00 | 14.00 | 2.00 | 0.00 | 1.00 | 1.00 | 1.00 |
| 2.00 | 1.00 | 1.00 | 15.00 | 2.00 | 0.00 | 1.00 | 1.00 | 1.00 |
| 2.00 | 1.00 | 1.00 | 16.00 | 2.00 | 0.00 | 1.00 | 1.00 | 1.00 |
| 1.00 | 1.00 | 1.00 | 15.00 | 2.00 | 0.00 | 1.00 | 1.00 | 1.00 |
| 2.00 | 1.00 | 0.00 | 17.00 | 2.00 | 1.00 | 1.00 | 1.00 | 1.00 |
| 2.00 | 1.00 | 1.00 | 17.00 | 2.00 | 0.00 | 1.00 | 1.00 | 1.00 |
| 1.00 | 1.00 | 0.00 | 6.00  | 1.00 | 0.00 | 1.00 | 1.00 | 1.00 |
| 0.00 | 1.00 | 1.00 | 13.00 | 2.00 | 0.00 | 1.00 | 0.00 | 0.00 |
| 0.00 | 1.00 | 1.00 | 14.00 | 2.00 | 0.00 | 1.00 | 1.00 | 1.00 |
| 0.00 | 1.00 | 0.00 | 7.00  | 2.00 | 0.00 | 1.00 | 1.00 | 1.00 |
| 0.00 | 1.00 | 0.00 | 2.00  | 1.00 | 0.00 | 1.00 | 0.00 | 0.00 |
| 1.00 | 1.00 | 1.00 | 14.00 | 2.00 | 0.00 | 1.00 | 1.00 | 1.00 |
| 2.00 | 1.00 | 1.00 | 16.00 | 2.00 | 0.00 | 1.00 | 1.00 | 1.00 |

|      |      |      |       |      |      |      |      |      |
|------|------|------|-------|------|------|------|------|------|
| 1.00 | 1.00 | 1.00 | 14.00 | 2.00 | 0.00 | 1.00 | 1.00 | 1.00 |
| 2.00 | 1.00 | 0.00 | 10.00 | 2.00 | 0.00 | 1.00 | 1.00 | 1.00 |
| 1.00 | 1.00 | 1.00 | 16.00 | 2.00 | 0.00 | 1.00 | 1.00 | 1.00 |
| 0.00 | 0.00 | 0.00 | 3.00  | 1.00 | 0.00 | 1.00 | 1.00 | 1.00 |
| 1.00 | 1.00 | 1.00 | 14.00 | 2.00 | 0.00 | 1.00 | 1.00 | 1.00 |
| 2.00 | 1.00 | 1.00 | 18.00 | 2.00 | 0.00 | 1.00 | 1.00 | 1.00 |
| 0.00 | 0.00 | 0.00 | 2.00  | 1.00 | 0.00 | 1.00 | 1.00 | 1.00 |
| 1.00 | 1.00 | 0.00 | 8.00  | 2.00 | 0.00 | 1.00 | 1.00 | 1.00 |
| 1.00 | 1.00 | 0.00 | 5.00  | 1.00 | 1.00 | 1.00 | 1.00 | 1.00 |
| 0.00 | 0.00 | 0.00 | 2.00  | 1.00 | 0.00 | 1.00 | 1.00 | 1.00 |
| 1.00 | 1.00 | 0.00 | 8.00  | 2.00 | 0.00 | 1.00 | 1.00 | 1.00 |
| 0.00 | 1.00 | 0.00 | 13.00 | 2.00 | 0.00 | 1.00 | 1.00 | 1.00 |
| 1.00 | 0.00 | 0.00 | 7.00  | 2.00 | 0.00 | 1.00 | 1.00 | 1.00 |
| 0.00 | 0.00 | 0.00 | 1.00  | 1.00 | 1.00 | 1.00 | 1.00 | 1.00 |
| 0.00 | 1.00 | 0.00 | 6.00  | 1.00 | 0.00 | 1.00 | 1.00 | 1.00 |
| 0.00 | 1.00 | 0.00 | 6.00  | 1.00 | 0.00 | 1.00 | 1.00 | 1.00 |
| 0.00 | 0.00 | 0.00 | 2.00  | 1.00 | 0.00 | 1.00 | 1.00 | 1.00 |
| 0.00 | 0.00 | 0.00 | 7.00  | 2.00 | 0.00 | 1.00 | 1.00 | 1.00 |
| 0.00 | 0.00 | 0.00 | 12.00 | 2.00 | 0.00 | 1.00 | 1.00 | 1.00 |
| 0.00 | 0.00 | 0.00 | 3.00  | 1.00 | 0.00 | 1.00 | 1.00 | 1.00 |
| 0.00 | 0.00 | 0.00 | 5.00  | 1.00 | 0.00 | 1.00 | 1.00 | 1.00 |
| 0.00 | 0.00 | 0.00 | 7.00  | 2.00 | 1.00 | 1.00 | 1.00 | 1.00 |
| 0.00 | 0.00 | 0.00 | 2.00  | 1.00 | 0.00 | 1.00 | 1.00 | 1.00 |
| 0.00 | 1.00 | 0.00 | 7.00  | 2.00 | 1.00 | 1.00 | 1.00 | 1.00 |
| 0.00 | 1.00 | 0.00 | 14.00 | 2.00 | 0.00 | 1.00 | 1.00 | 1.00 |
| 0.00 | 1.00 | 0.00 | 12.00 | 2.00 | 0.00 | 1.00 | 1.00 | 1.00 |
| 0.00 | 0.00 | 0.00 | 6.00  | 1.00 | 0.00 | 1.00 | 1.00 | 1.00 |
| 0.00 | 1.00 | 0.00 | 7.00  | 2.00 | 0.00 | 1.00 | 1.00 | 1.00 |
| 0.00 | 0.00 | 0.00 | 4.00  | 1.00 | 0.00 | 1.00 | 1.00 | 1.00 |
| 0.00 | 1.00 | 1.00 | 16.00 | 2.00 | 0.00 | 1.00 | 1.00 | 1.00 |
| 0.00 | 1.00 | 0.00 | 11.00 | 2.00 | 0.00 | 1.00 | 1.00 | 1.00 |
| 0.00 | 0.00 | 0.00 | 3.00  | 1.00 | 0.00 | 1.00 | 1.00 | 1.00 |
| 0.00 | 0.00 | 0.00 | 2.00  | 1.00 | 0.00 | 1.00 | 1.00 | 1.00 |
| 0.00 | 0.00 | 0.00 | 6.00  | 1.00 | 0.00 | 1.00 | 1.00 | 1.00 |
| 0.00 | 0.00 | 0.00 | 4.00  | 1.00 | 0.00 | 1.00 | 1.00 | 1.00 |
| 0.00 | 0.00 | 0.00 | 1.00  | 1.00 | 0.00 | 1.00 | 1.00 | 1.00 |
| 0.00 | 0.00 | 0.00 | 1.00  | 1.00 | 0.00 | 1.00 | 1.00 | 1.00 |
| 0.00 | 0.00 | 0.00 | 1.00  | 1.00 | 0.00 | 1.00 | 1.00 | 1.00 |
| 0.00 | 0.00 | 0.00 | 3.00  | 1.00 | 0.00 | 1.00 | 1.00 | 1.00 |
| 0.00 | 0.00 | 0.00 | 2.00  | 1.00 | 0.00 | 1.00 | 1.00 | 1.00 |
| 0.00 | 0.00 | 0.00 | 0.00  | 1.00 | 0.00 | 1.00 | 1.00 | 1.00 |
| 0.00 | 0.00 | 0.00 | 2.00  | 1.00 | 0.00 | 1.00 | 1.00 | 1.00 |
| 0.00 | 0.00 | 0.00 | 4.00  | 1.00 | 1.00 | 1.00 | 1.00 | 1.00 |
| 0.00 | 0.00 | 0.00 | 1.00  | 1.00 | 0.00 | 1.00 | 1.00 | 1.00 |
| 0.00 | 0.00 | 0.00 | 3.00  | 1.00 | 1.00 | 1.00 | 1.00 | 1.00 |
| 0.00 | 0.00 | 0.00 | 5.00  | 1.00 | 0.00 | 1.00 | 1.00 | 1.00 |



|      |      |      |       |      |      |      |      |      |
|------|------|------|-------|------|------|------|------|------|
| 0.00 | 0.00 | 0.00 | 4.00  | 1.00 | 0.00 | 1.00 | 1.00 | 1.00 |
| 0.00 | 0.00 | 0.00 | 4.00  | 1.00 | 0.00 | 1.00 | 1.00 | 1.00 |
| 0.00 | 0.00 | 0.00 | 3.00  | 1.00 | 0.00 | 1.00 | 1.00 | 1.00 |
| 0.00 | 0.00 | 0.00 | 4.00  | 1.00 | 0.00 | 1.00 | 1.00 | 1.00 |
| 0.00 | 0.00 | 0.00 | 5.00  | 1.00 | 0.00 | 1.00 | 1.00 | 1.00 |
| 0.00 | 0.00 | 0.00 | 4.00  | 1.00 | 0.00 | 1.00 | 1.00 | 1.00 |
| 0.00 | 0.00 | 0.00 | 2.00  | 1.00 | 0.00 | 1.00 | 1.00 | 1.00 |
| 0.00 | 0.00 | 0.00 | 2.00  | 1.00 | 0.00 | 0.00 | 1.00 | 0.00 |
| 0.00 | 0.00 | 0.00 | 5.00  | 1.00 | 0.00 | 1.00 | 1.00 | 1.00 |
| 0.00 | 0.00 | 0.00 | 5.00  | 1.00 | 0.00 | 1.00 | 1.00 | 1.00 |
| 0.00 | 0.00 | 0.00 | 8.00  | 2.00 | 0.00 | 1.00 | 1.00 | 1.00 |
| 0.00 | 0.00 | 0.00 | 12.00 | 2.00 | 0.00 | 1.00 | 1.00 | 1.00 |
| 0.00 | 0.00 | 0.00 | 6.00  | 1.00 | 0.00 | 0.00 | 1.00 | 0.00 |
| 0.00 | 0.00 | 0.00 | 7.00  | 2.00 | 0.00 | 1.00 | 1.00 | 1.00 |
| 0.00 | 0.00 | 0.00 | 8.00  | 2.00 | 0.00 | 1.00 | 1.00 | 1.00 |
| 0.00 | 0.00 | 0.00 | 3.00  | 1.00 | 0.00 | 1.00 | 1.00 | 1.00 |
| 0.00 | 0.00 | 0.00 | 9.00  | 2.00 | 0.00 | 1.00 | 1.00 | 1.00 |
| 0.00 | 0.00 | 0.00 | 2.00  | 1.00 | 0.00 | 1.00 | 1.00 | 1.00 |
| 0.00 | 0.00 | 0.00 | 3.00  | 1.00 | 0.00 | 1.00 | 1.00 | 1.00 |
| 0.00 | 0.00 | 0.00 | 5.00  | 1.00 | 0.00 | 1.00 | 1.00 | 1.00 |
| 0.00 | 0.00 | 0.00 | 3.00  | 1.00 | 0.00 | 1.00 | 1.00 | 1.00 |
| 0.00 | 0.00 | 0.00 | 1.00  | 1.00 | 0.00 | 1.00 | 1.00 | 1.00 |
| 0.00 | 0.00 | 0.00 | 4.00  | 1.00 | 0.00 | 1.00 | 1.00 | 1.00 |
| 0.00 | 0.00 | 0.00 | 1.00  | 1.00 | 0.00 | 1.00 | 1.00 | 1.00 |
| 0.00 | 0.00 | 0.00 | 2.00  | 1.00 | 0.00 | 1.00 | 1.00 | 1.00 |
| 0.00 | 1.00 | 0.00 | 10.00 | 2.00 | 1.00 | 1.00 | 1.00 | 1.00 |
| 0.00 | 0.00 | 0.00 | 3.00  | 1.00 | 0.00 | 0.00 | 0.00 | 0.00 |
| 0.00 | 0.00 | 0.00 | 5.00  | 1.00 | 0.00 | 0.00 | 0.00 | 0.00 |
| 0.00 | 1.00 | 0.00 | 6.00  | 1.00 | 0.00 | 1.00 | 0.00 | 0.00 |
| 0.00 | 1.00 | 1.00 | 15.00 | 2.00 | 0.00 | 1.00 | 1.00 | 1.00 |
| 2.00 | 1.00 | 1.00 | 17.00 | 2.00 | 0.00 | 1.00 | 1.00 | 1.00 |
| 0.00 | 1.00 | 0.00 | 9.00  | 2.00 | 0.00 | 1.00 | 1.00 | 1.00 |
| 1.00 | 1.00 | 0.00 | 10.00 | 2.00 | 0.00 | 1.00 | 1.00 | 1.00 |
| 1.00 | 1.00 | 1.00 | 13.00 | 2.00 | 0.00 | 1.00 | 0.00 | 0.00 |
| 2.00 | 0.00 | 1.00 | 12.00 | 2.00 | 0.00 | 1.00 | 1.00 | 1.00 |
| 1.00 | 0.00 | 0.00 | 5.00  | 1.00 | 0.00 | 1.00 | 1.00 | 1.00 |
| 0.00 | 1.00 | 1.00 | 18.00 | 2.00 | 1.00 | 1.00 | 0.00 | 0.00 |
| 1.00 | 0.00 | 1.00 | 16.00 | 2.00 | 1.00 | 1.00 | 1.00 | 1.00 |
| 0.00 | 1.00 | 0.00 | 4.00  | 1.00 | 0.00 | 1.00 | 1.00 | 1.00 |
| 0.00 | 1.00 | 1.00 | 14.00 | 2.00 | 0.00 | 1.00 | 1.00 | 1.00 |
| 0.00 | 1.00 | 1.00 | 14.00 | 2.00 | 0.00 | 1.00 | 1.00 | 1.00 |
| 2.00 | 1.00 | 1.00 | 18.00 | 2.00 | 0.00 | 1.00 | 0.00 | 0.00 |
| 0.00 | 1.00 | 0.00 | 7.00  | 2.00 | 0.00 | 1.00 | 0.00 | 0.00 |
| 2.00 | 1.00 | 0.00 | 17.00 | 2.00 | 0.00 | 1.00 | 1.00 | 1.00 |
| 0.00 | 0.00 | 0.00 | 3.00  | 1.00 | 0.00 | 1.00 | 1.00 | 1.00 |
| 0.00 | 0.00 | 0.00 | 7.00  | 2.00 | 0.00 | 1.00 | 1.00 | 1.00 |
| 2.00 | 1.00 | 0.00 | 12.00 | 2.00 | 0.00 | 1.00 | 1.00 | 1.00 |

|      |      |      |       |      |      |      |      |      |
|------|------|------|-------|------|------|------|------|------|
| 2.00 | 1.00 | 1.00 | 20.00 | 2.00 | 0.00 | 1.00 | 1.00 | 1.00 |
| 0.00 | 0.00 | 1.00 | 15.00 | 2.00 | 1.00 | 1.00 | 1.00 | 1.00 |
| 0.00 | 0.00 | 1.00 | 13.00 | 2.00 | 0.00 | 1.00 | 1.00 | 1.00 |
| 1.00 | 0.00 | 1.00 | 14.00 | 2.00 | 0.00 | 1.00 | 0.00 | 0.00 |
| 0.00 | 1.00 | 1.00 | 13.00 | 2.00 | 0.00 | 1.00 | 1.00 | 1.00 |
| 0.00 | 1.00 | 1.00 | 13.00 | 2.00 | 0.00 | 1.00 | 1.00 | 1.00 |
| 0.00 | 1.00 | 0.00 | 8.00  | 2.00 | 1.00 | 1.00 | 1.00 | 1.00 |
| 1.00 | 1.00 | 0.00 | 9.00  | 2.00 | 0.00 | 1.00 | 0.00 | 0.00 |
| 1.00 | 1.00 | 1.00 | 16.00 | 2.00 | 0.00 | 1.00 | 0.00 | 0.00 |
| 1.00 | 1.00 | 1.00 | 15.00 | 2.00 | 0.00 | 1.00 | 0.00 | 0.00 |
| 0.00 | 0.00 | 0.00 | 9.00  | 2.00 | 0.00 | 1.00 | 1.00 | 1.00 |
| 0.00 | 1.00 | 1.00 | 15.00 | 2.00 | 0.00 | 1.00 | 1.00 | 1.00 |
| 1.00 | 1.00 | 1.00 | 16.00 | 2.00 | 0.00 | 0.00 | 1.00 | 0.00 |
| 0.00 | 0.00 | 0.00 | 7.00  | 2.00 | 0.00 | 1.00 | 1.00 | 1.00 |



| Education1 | Occupator | Postnatal | Postnatal2 | Agechild2 | DDS  | Minimum | Parity | Interaction |
|------------|-----------|-----------|------------|-----------|------|---------|--------|-------------|
| 1.00       | 2.00      | 9.40      | 0.45       | 3.00      | 3.00 | 0.00    | 3.00   | 3.00        |
| 1.00       | 1.00      | 6.20      | 0.56       | 2.00      | 3.00 | 0.00    | 2.00   | 2.00        |
| 2.00       | 1.00      | 6.80      | 0.52       | 3.00      | 3.00 | 0.00    | 2.00   | 0.00        |
| 1.00       | 1.00      | 4.60      | 0.58       | 2.00      | 1.00 | 0.00    | 3.00   | 0.00        |
| 1.00       | 3.00      | 2.00      | 1.00       | 1.00      | 0.00 | 0.00    | 3.00   | 1.00        |
| 1.00       | 2.00      | 5.90      | 0.98       | 2.00      | 4.00 | 1.00    | 2.00   | 2.00        |
| 2.00       | 3.00      | 5.40      | 0.45       | 3.00      | 2.00 | 0.00    | 2.00   | 0.00        |
| 2.00       | 2.00      | 4.90      | 0.38       | 3.00      | 1.00 | 0.00    | 1.00   | 0.00        |
| 2.00       | 1.00      | 3.90      | 0.98       | 1.00      | 0.00 | 0.00    | 2.00   | 1.00        |
| 2.00       | 2.00      | 3.80      | 0.54       | 2.00      | 4.00 | 1.00    | 2.00   | 0.00        |
| 0.00       | 1.00      | 4.70      | 1.18       | 1.00      | 0.00 | 0.00    | 3.00   | 0.00        |
| 1.00       | 2.00      | 4.70      | 1.18       | 1.00      | 0.00 | 0.00    | 2.00   | 1.00        |
| 0.00       | 1.00      | 4.80      | 0.96       | 1.00      | 0.00 | 0.00    | 2.00   | 0.00        |
| 1.00       | 1.00      | 4.40      | 0.55       | 2.00      | 1.00 | 0.00    | 2.00   | 0.00        |
| 1.00       | 1.00      | 2.00      | 0.67       | 1.00      | 0.00 | 0.00    | 2.00   | 1.00        |
| 1.00       | 1.00      | 3.70      | 0.74       | 1.00      | 0.00 | 0.00    | 2.00   | 0.00        |
| 1.00       | 1.00      | 5.60      | 0.93       | 2.00      | 4.00 | 1.00    | 2.00   | 2.00        |
| 1.00       | 1.00      | 2.60      | 0.24       | 2.00      | 3.00 | 0.00    | 3.00   | 0.00        |
| 2.00       | 3.00      | 4.00      | 1.33       | 1.00      | 0.00 | 0.00    | 3.00   | 0.00        |
| 1.00       | 2.00      | 3.70      | 1.23       | 1.00      | 0.00 | 0.00    | 3.00   | 1.00        |
| 1.00       | 1.00      | 4.60      | 0.92       | 1.00      | 0.00 | 0.00    | 2.00   | 1.00        |
| 1.00       | 1.00      | 4.70      | 0.59       | 2.00      | 5.00 | 1.00    | 2.00   | 0.00        |
| 1.00       | 1.00      | 6.90      | 0.86       | 2.00      | 5.00 | 1.00    | 3.00   | 2.00        |
| 2.00       | 1.00      | 6.00      | 0.50       | 3.00      | 5.00 | 1.00    | 2.00   | 0.00        |
| 1.00       | 3.00      | 6.80      | 0.36       | 3.00      | 2.00 | 0.00    | 3.00   | 3.00        |
| 0.00       | 2.00      | 4.30      | 0.61       | 2.00      | 4.00 | 1.00    | 3.00   | 2.00        |
| 1.00       | 2.00      | 4.00      | 1.00       | 1.00      | 0.00 | 0.00    | 3.00   | 1.00        |
| 1.00       | 1.00      | 5.80      | 0.64       | 2.00      | 4.00 | 1.00    | 2.00   | 0.00        |
| 0.00       | 2.00      | 7.00      | 0.54       | 3.00      | 4.00 | 1.00    | 3.00   | 3.00        |
| 1.00       | 2.00      | 6.60      | 0.83       | 2.00      | 6.00 | 1.00    | 3.00   | 0.00        |
| 0.00       | 2.00      | 4.80      | 0.60       | 2.00      | 4.00 | 1.00    | 2.00   | 0.00        |
| 0.00       | 1.00      | 5.50      | 0.79       | 2.00      | 3.00 | 0.00    | 2.00   | 0.00        |
| 0.00       | 1.00      | 6.70      | 0.61       | 2.00      | 3.00 | 0.00    | 2.00   | 2.00        |
| 0.00       | 2.00      | 5.60      | 0.51       | 2.00      | 4.00 | 1.00    | 3.00   | 2.00        |
| 0.00       | 2.00      | 6.40      | 0.58       | 2.00      | 4.00 | 1.00    | 3.00   | 0.00        |
| 2.00       | 1.00      | 6.40      | 1.07       | 2.00      | 4.00 | 1.00    | 2.00   | 0.00        |
| 2.00       | 1.00      | 10.90     | 0.55       | 3.00      | 3.00 | 0.00    | 2.00   | 3.00        |
| 1.00       | 1.00      | 8.40      | 0.47       | 3.00      | 3.00 | 0.00    | 2.00   | 0.00        |
| 1.00       | 3.00      | 4.50      | 0.41       | 2.00      | 5.00 | 1.00    | 2.00   | 0.00        |
| 0.00       | 1.00      | 5.40      | 0.54       | 2.00      | 4.00 | 1.00    | 3.00   | 0.00        |
| 1.00       | 3.00      | 9.10      | 0.38       | 3.00      | 4.00 | 1.00    | 3.00   | 3.00        |
| 1.00       | 1.00      | 7.20      | 0.60       | 3.00      | 4.00 | 1.00    | 3.00   | 0.00        |
| 1.00       | 1.00      | 7.60      | 0.63       | 3.00      | 4.00 | 1.00    | 3.00   | 3.00        |
| 1.00       | 2.00      | 6.70      | 0.29       | 3.00      | 6.00 | 1.00    | 3.00   | 3.00        |
| 0.00       | 2.00      | 9.20      | 0.38       | 3.00      | 3.00 | 0.00    | 3.00   | 3.00        |
| 0.00       | 2.00      | 8.90      | 0.68       | 3.00      | 5.00 | 1.00    | 3.00   | 3.00        |

|      |      |       |      |      |      |      |      |      |
|------|------|-------|------|------|------|------|------|------|
| 1.00 | 1.00 | 10.30 | 0.43 | 3.00 | 3.00 | 0.00 | 3.00 | 0.00 |
| 1.00 | 1.00 | 4.00  | 0.57 | 2.00 | 1.00 | 0.00 | 2.00 | 0.00 |
| 1.00 | 1.00 | 2.90  | 0.58 | 1.00 | 0.00 | 0.00 | 2.00 | 1.00 |
| 1.00 | 3.00 | 4.00  | 0.67 | 2.00 | 1.00 | 0.00 | 1.00 | 2.00 |
| 0.00 | 1.00 | 3.40  | 0.57 | 2.00 | 3.00 | 0.00 | 2.00 | 0.00 |
| 1.00 | 3.00 | 3.80  | 1.27 | 1.00 | 0.00 | 0.00 | 2.00 | 1.00 |
| 0.00 | 2.00 | 4.40  | 0.40 | 2.00 | 4.00 | 1.00 | 3.00 | 0.00 |
| 1.00 | 3.00 | 7.30  | 0.38 | 3.00 | 5.00 | 1.00 | 1.00 | 0.00 |
| 0.00 | 2.00 | 6.85  | 0.29 | 3.00 | 3.00 | 0.00 | 3.00 | 3.00 |
| 0.00 | 2.00 | 6.10  | 1.22 | 1.00 | 4.00 | 1.00 | 3.00 | 0.00 |
| 1.00 | 1.00 | 6.80  | 0.68 | 2.00 | 3.00 | 0.00 | 2.00 | 0.00 |
| 1.00 | 1.00 | 4.60  | 0.33 | 3.00 | 2.00 | 0.00 | 2.00 | 0.00 |
| 1.00 | 3.00 | 1.90  | 0.95 | 1.00 | 0.00 | 0.00 | 3.00 | 1.00 |
| 0.00 | 1.00 | 7.20  | 0.36 | 3.00 | 5.00 | 1.00 | 2.00 | 3.00 |
| 1.00 | 3.00 | 4.20  | 1.05 | 1.00 | 4.00 | 1.00 | 2.00 | 0.00 |
| 0.00 | 2.00 | 9.20  | 0.38 | 3.00 | 4.00 | 1.00 | 3.00 | 3.00 |
| 1.00 | 3.00 | 2.60  | 1.30 | 1.00 | 0.00 | 0.00 | 2.00 | 0.00 |
| 0.00 | 2.00 | 6.30  | 0.48 | 3.00 | 2.00 | 0.00 | 3.00 | 0.00 |
| 0.00 | 2.00 | 7.20  | 0.34 | 3.00 | 3.00 | 0.00 | 3.00 | 3.00 |
| 0.00 | 1.00 | 4.10  | 0.68 | 2.00 | 4.00 | 1.00 | 3.00 | 0.00 |
| 0.00 | 2.00 | 2.30  | 0.46 | 1.00 | 0.00 | 0.00 | 3.00 | 1.00 |
| 0.00 | 2.00 | 7.90  | 0.36 | 3.00 | 4.00 | 1.00 | 3.00 | 3.00 |
| 0.00 | 1.00 | 7.70  | 0.77 | 2.00 | 1.00 | 0.00 | 2.00 | 0.00 |
| 0.00 | 2.00 | 3.60  | 0.72 | 1.00 | 2.00 | 0.00 | 3.00 | 1.00 |
| 1.00 | 2.00 | 5.80  | 0.48 | 3.00 | 5.00 | 1.00 | 3.00 | 0.00 |
| 1.00 | 2.00 | 4.30  | 0.61 | 2.00 | 1.00 | 0.00 | 3.00 | 0.00 |
| 1.00 | 2.00 | 3.70  | 0.46 | 2.00 | 1.00 | 0.00 | 3.00 | 2.00 |
| 2.00 | 1.00 | 4.80  | 0.44 | 2.00 | 4.00 | 1.00 | 3.00 | 0.00 |
| 1.00 | 2.00 | 4.10  | 1.03 | 1.00 | 0.00 | 0.00 | 2.00 | 0.00 |
| 0.00 | 2.00 | 8.10  | 0.54 | 3.00 | 3.00 | 0.00 | 3.00 | 3.00 |
| 1.00 | 2.00 | 7.10  | 1.18 | 2.00 | 2.00 | 0.00 | 2.00 | 0.00 |
| 0.00 | 2.00 | 5.30  | 0.29 | 3.00 | 5.00 | 1.00 | 3.00 | 0.00 |
| 0.00 | 2.00 | 3.30  | 1.10 | 1.00 | 0.00 | 0.00 | 3.00 | 0.00 |
| 1.00 | 2.00 | 5.70  | 0.52 | 2.00 | 3.00 | 0.00 | 3.00 | 2.00 |
| 0.00 | 2.00 | 6.80  | 0.40 | 3.00 | 4.00 | 1.00 | 3.00 | 3.00 |
| 0.00 | 2.00 | 5.50  | 0.50 | 2.00 | 3.00 | 0.00 | 3.00 | 0.00 |
| 1.00 | 2.00 | 6.30  | 0.63 | 2.00 | 5.00 | 1.00 | 3.00 | 0.00 |
| 2.00 | 3.00 | 5.50  | 0.37 | 3.00 | 3.00 | 0.00 | 3.00 | 3.00 |
| 0.00 | 1.00 | 5.60  | 0.80 | 2.00 | 4.00 | 1.00 | 3.00 | 0.00 |
| 2.00 | 3.00 | 9.90  | 0.41 | 3.00 | 2.00 | 0.00 | 2.00 | 3.00 |
| 1.00 | 2.00 | 4.80  | 0.25 | 3.00 | 5.00 | 1.00 | 3.00 | 3.00 |
| 1.00 | 3.00 | 4.90  | 0.35 | 3.00 | 2.00 | 0.00 | 2.00 | 0.00 |
| 1.00 | 2.00 | 4.30  | 0.86 | 1.00 | 0.00 | 0.00 | 3.00 | 1.00 |
| 1.00 | 2.00 | 5.10  | 0.43 | 3.00 | 2.00 | 0.00 | 2.00 | 0.00 |
| 0.00 | 2.00 | 5.60  | 0.51 | 2.00 | 1.00 | 0.00 | 3.00 | 2.00 |
| 1.00 | 3.00 | 2.00  | 0.67 | 1.00 | 6.00 | 1.00 | 2.00 | 0.00 |
| 2.00 | 3.00 | 3.50  | 0.70 | 1.00 | 7.00 | 1.00 | 3.00 | 0.00 |

|      |      |       |      |      |      |      |      |      |
|------|------|-------|------|------|------|------|------|------|
| 0.00 | 2.00 | 6.10  | 0.27 | 3.00 | 5.00 | 1.00 | 3.00 | 3.00 |
| 0.00 | 1.00 | 4.40  | 0.55 | 2.00 | 7.00 | 1.00 | 2.00 | 0.00 |
| 2.00 | 1.00 | 3.00  | 0.60 | 1.00 | 0.00 | 0.00 | 1.00 | 1.00 |
| 1.00 | 1.00 | 4.20  | 1.40 | 1.00 | 0.00 | 0.00 | 3.00 | 0.00 |
| 1.00 | 1.00 | 6.20  | 0.36 | 3.00 | 2.00 | 0.00 | 3.00 | 3.00 |
| 0.00 | 1.00 | 3.20  | 0.53 | 2.00 | 2.00 | 0.00 | 3.00 | 0.00 |
| 0.00 | 1.00 | 5.50  | 0.46 | 3.00 | 4.00 | 1.00 | 3.00 | 3.00 |
| 1.00 | 3.00 | 5.70  | 1.43 | 1.00 | 3.00 | 0.00 | 2.00 | 0.00 |
| 0.00 | 2.00 | 4.20  | 0.42 | 2.00 | 2.00 | 0.00 | 3.00 | 2.00 |
| 1.00 | 1.00 | 5.60  | 0.47 | 3.00 | 5.00 | 1.00 | 3.00 | 0.00 |
| 0.00 | 3.00 | 4.80  | 0.53 | 2.00 | 1.00 | 0.00 | 2.00 | 2.00 |
| 0.00 | 2.00 | 4.80  | 1.60 | 1.00 | 4.00 | 1.00 | 3.00 | 0.00 |
| 0.00 | 1.00 | 6.30  | 0.33 | 3.00 | 3.00 | 0.00 | 1.00 | 3.00 |
| 0.00 | 2.00 | 5.40  | 0.68 | 2.00 | 3.00 | 0.00 | 3.00 | 2.00 |
| 0.00 | 2.00 | 10.90 | 0.45 | 3.00 | 4.00 | 1.00 | 2.00 | 3.00 |
| 1.00 | 2.00 | 4.00  | 1.00 | 1.00 | 1.00 | 0.00 | 3.00 | 0.00 |
| 0.00 | 2.00 | 2.60  | 0.65 | 1.00 | 0.00 | 0.00 | 3.00 | 0.00 |
| 0.00 | 2.00 | 3.50  | 0.88 | 1.00 | 1.00 | 0.00 | 3.00 | 0.00 |
| 0.00 | 2.00 | 6.30  | 0.39 | 3.00 | 2.00 | 0.00 | 3.00 | 3.00 |
| 1.00 | 1.00 | 2.60  | 0.87 | 1.00 | 2.00 | 0.00 | 3.00 | 0.00 |
| 1.00 | 2.00 | 9.50  | 0.48 | 3.00 | 4.00 | 1.00 | 3.00 | 0.00 |
| 0.00 | 2.00 | 6.70  | 0.28 | 3.00 | 3.00 | 0.00 | 2.00 | 3.00 |
| 0.00 | 2.00 | 2.00  | 0.67 | 1.00 | 4.00 | 1.00 | 3.00 | 0.00 |
| 0.00 | 1.00 | 9.20  | 0.40 | 3.00 | 4.00 | 1.00 | 3.00 | 3.00 |
| 1.00 | 2.00 | 7.40  | 0.32 | 3.00 | 2.00 | 0.00 | 3.00 | 3.00 |
| 0.00 | 2.00 | 3.30  | 0.66 | 1.00 | 0.00 | 0.00 | 2.00 | 0.00 |
| 1.00 | 1.00 | 3.80  | 0.76 | 1.00 | 0.00 | 0.00 | 2.00 | 1.00 |
| 0.00 | 1.00 | 6.00  | 0.55 | 2.00 | 3.00 | 0.00 | 3.00 | 2.00 |
| 1.00 | 2.00 | 2.80  | 0.70 | 1.00 | 1.00 | 0.00 | 2.00 | 0.00 |
| 1.00 | 1.00 | 7.00  | 0.37 | 3.00 | 4.00 | 1.00 | 3.00 | 3.00 |
| 1.00 | 1.00 | 6.40  | 0.91 | 2.00 | 1.00 | 0.00 | 3.00 | 0.00 |
| 0.00 | 3.00 | 3.00  | 1.00 | 1.00 | 0.00 | 0.00 | 2.00 | 0.00 |
| 1.00 | 1.00 | 1.80  | 0.90 | 1.00 | 0.00 | 0.00 | 3.00 | 1.00 |
| 0.00 | 1.00 | 4.50  | 0.90 | 1.00 | 0.00 | 0.00 | 3.00 | 0.00 |
| 2.00 | 1.00 | 6.80  | 0.36 | 3.00 | 6.00 | 1.00 | 2.00 | 3.00 |
| 0.00 | 1.00 | 3.80  | 0.63 | 2.00 | 6.00 | 1.00 | 2.00 | 0.00 |
| 1.00 | 1.00 | 2.80  | 1.40 | 1.00 | 0.00 | 0.00 | 2.00 | 0.00 |
| 0.00 | 1.00 | 7.00  | 0.41 | 3.00 | 4.00 | 1.00 | 3.00 | 3.00 |
| 1.00 | 1.00 | 3.90  | 0.49 | 2.00 | 6.00 | 1.00 | 3.00 | 0.00 |
| 2.00 | 1.00 | 5.30  | 0.33 | 3.00 | 5.00 | 1.00 | 2.00 | 3.00 |
| 0.00 | 2.00 | 4.00  | 0.67 | 2.00 | 3.00 | 0.00 | 3.00 | 0.00 |
| 0.00 | 2.00 | 7.00  | 0.70 | 2.00 | 4.00 | 1.00 | 3.00 | 2.00 |
| 0.00 | 2.00 | 4.50  | 1.50 | 1.00 | 0.00 | 0.00 | 3.00 | 0.00 |
| 1.00 | 2.00 | 4.60  | 0.42 | 2.00 | 4.00 | 1.00 | 3.00 | 0.00 |
| 1.00 | 3.00 | 4.20  | 0.60 | 2.00 | 1.00 | 0.00 | 2.00 | 2.00 |
| 0.00 | 2.00 | 3.80  | 0.48 | 2.00 | 5.00 | 1.00 | 3.00 | 0.00 |
| 0.00 | 2.00 | 2.70  | 0.45 | 2.00 | 2.00 | 0.00 | 3.00 | 0.00 |

|      |      |       |      |      |      |      |      |      |
|------|------|-------|------|------|------|------|------|------|
| 1.00 | 3.00 | 8.40  | 0.38 | 3.00 | 5.00 | 1.00 | 3.00 | 3.00 |
| 1.00 | 2.00 | 5.00  | 0.83 | 2.00 | 4.00 | 1.00 | 2.00 | 0.00 |
| 1.00 | 1.00 | 7.00  | 0.37 | 3.00 | 3.00 | 0.00 | 3.00 | 3.00 |
| 1.00 | 1.00 | 3.00  | 0.75 | 1.00 | 0.00 | 0.00 | 2.00 | 1.00 |
| 0.00 | 1.00 | 2.30  | 1.15 | 1.00 | 0.00 | 0.00 | 3.00 | 1.00 |
| 1.00 | 1.00 | 5.40  | 0.68 | 2.00 | 4.00 | 1.00 | 2.00 | 0.00 |
| 1.00 | 1.00 | 3.50  | 0.70 | 1.00 | 0.00 | 0.00 | 3.00 | 0.00 |
| 2.00 | 1.00 | 5.70  | 0.81 | 2.00 | 2.00 | 0.00 | 2.00 | 2.00 |
| 1.00 | 3.00 | 6.10  | 0.68 | 2.00 | 4.00 | 1.00 | 2.00 | 0.00 |
| 2.00 | 1.00 | 6.10  | 0.44 | 3.00 | 3.00 | 0.00 | 2.00 | 3.00 |
| 2.00 | 1.00 | 5.00  | 1.00 | 1.00 | 3.00 | 0.00 | 3.00 | 0.00 |
| 2.00 | 1.00 | 1.20  | 0.60 | 1.00 | 0.00 | 0.00 | 3.00 | 1.00 |
| 2.00 | 1.00 | 7.60  | 0.38 | 3.00 | 6.00 | 1.00 | 3.00 | 3.00 |
| 0.00 | 2.00 | 6.40  | 0.64 | 2.00 | 2.00 | 0.00 | 3.00 | 0.00 |
| 0.00 | 1.00 | 6.50  | 0.38 | 3.00 | 5.00 | 1.00 | 3.00 | 3.00 |
| 1.00 | 2.00 | 6.00  | 0.67 | 2.00 | 3.00 | 0.00 | 2.00 | 0.00 |
| 0.00 | 2.00 | 6.30  | 0.26 | 3.00 | 5.00 | 1.00 | 3.00 | 0.00 |
| 1.00 | 1.00 | 6.60  | 0.73 | 2.00 | 4.00 | 1.00 | 3.00 | 0.00 |
| 0.00 | 1.00 | 5.70  | 0.34 | 3.00 | 4.00 | 1.00 | 2.00 | 3.00 |
| 0.00 | 2.00 | 5.00  | 0.71 | 2.00 | 1.00 | 0.00 | 3.00 | 0.00 |
| 2.00 | 1.00 | 5.90  | 0.37 | 3.00 | 4.00 | 1.00 | 2.00 | 3.00 |
| 1.00 | 2.00 | 5.10  | 1.28 | 1.00 | 5.00 | 1.00 | 3.00 | 0.00 |
| 0.00 | 2.00 | 3.00  | 0.43 | 2.00 | 2.00 | 0.00 | 3.00 | 0.00 |
| 1.00 | 2.00 | 6.30  | 0.27 | 3.00 | 5.00 | 1.00 | 2.00 | 3.00 |
| 0.00 | 1.00 | 6.50  | 0.27 | 3.00 | 4.00 | 1.00 | 3.00 | 3.00 |
| 1.00 | 2.00 | 3.80  | 0.42 | 2.00 | 1.00 | 0.00 | 2.00 | 0.00 |
| 1.00 | 2.00 | 11.70 | 1.06 | 2.00 | 4.00 | 1.00 | 3.00 | 2.00 |
| 1.00 | 2.00 | 5.60  | 0.70 | 2.00 | 3.00 | 0.00 | 2.00 | 0.00 |
| 0.00 | 2.00 | 4.60  | 0.77 | 2.00 | 4.00 | 1.00 | 2.00 | 2.00 |
| 1.00 | 1.00 | 5.00  | 0.71 | 2.00 | 3.00 | 0.00 | 3.00 | 0.00 |
| 0.00 | 2.00 | 6.00  | 0.32 | 3.00 | 4.00 | 1.00 | 3.00 | 3.00 |
| 1.00 | 2.00 | 3.50  | 0.88 | 1.00 | 5.00 | 1.00 | 2.00 | 0.00 |
| 1.00 | 2.00 | 5.90  | 0.45 | 3.00 | 4.00 | 1.00 | 3.00 | 3.00 |
| 1.00 | 2.00 | 7.60  | 0.33 | 3.00 | 3.00 | 0.00 | 2.00 | 3.00 |
| 1.00 | 2.00 | 4.80  | 0.69 | 2.00 | 4.00 | 1.00 | 2.00 | 0.00 |
| 0.00 | 2.00 | 2.00  | 1.00 | 1.00 | 0.00 | 0.00 | 2.00 | 0.00 |
| 1.00 | 2.00 | 6.00  | 2.00 | 1.00 | 5.00 | 1.00 | 3.00 | 0.00 |
| 0.00 | 2.00 | 6.10  | 0.36 | 3.00 | 4.00 | 1.00 | 3.00 | 0.00 |
| 0.00 | 2.00 | 3.70  | 0.41 | 2.00 | 7.00 | 1.00 | 2.00 | 0.00 |
| 0.00 | 2.00 | 5.40  | 0.60 | 2.00 | 1.00 | 0.00 | 3.00 | 2.00 |
| 0.00 | 1.00 | 4.90  | 0.82 | 2.00 | 2.00 | 0.00 | 3.00 | 0.00 |
| 0.00 | 1.00 | 5.80  | 0.45 | 3.00 | 3.00 | 0.00 | 2.00 | 3.00 |
| 0.00 | 2.00 | 6.00  | 0.75 | 2.00 | 4.00 | 1.00 | 3.00 | 0.00 |
| 0.00 | 1.00 | 4.20  | 0.70 | 2.00 | 3.00 | 0.00 | 3.00 | 0.00 |
| 0.00 | 1.00 | 8.10  | 0.35 | 3.00 | 5.00 | 1.00 | 3.00 | 3.00 |
| 0.00 | 2.00 | 5.80  | 0.64 | 2.00 | 4.00 | 1.00 | 2.00 | 2.00 |
| 0.00 | 2.00 | 5.10  | 0.73 | 2.00 | 5.00 | 1.00 | 3.00 | 0.00 |

|      |      |      |      |      |      |      |      |      |
|------|------|------|------|------|------|------|------|------|
| 1.00 | 1.00 | 6.10 | 0.27 | 3.00 | 2.00 | 0.00 | 2.00 | 3.00 |
| 1.00 | 1.00 | 4.90 | 0.82 | 2.00 | 2.00 | 0.00 | 3.00 | 0.00 |
| 1.00 | 1.00 | 8.10 | 0.74 | 2.00 | 5.00 | 1.00 | 2.00 | 0.00 |
| 1.00 | 3.00 | 5.50 | 0.61 | 2.00 | 4.00 | 1.00 | 3.00 | 0.00 |
| 1.00 | 3.00 | 5.40 | 0.60 | 2.00 | 2.00 | 0.00 | 3.00 | 2.00 |
| 1.00 | 2.00 | 4.60 | 0.58 | 2.00 | 5.00 | 1.00 | 2.00 | 0.00 |
| 0.00 | 2.00 | 5.00 | 0.45 | 2.00 | 3.00 | 0.00 | 3.00 | 0.00 |
| 1.00 | 2.00 | 5.00 | 0.63 | 2.00 | 4.00 | 1.00 | 2.00 | 2.00 |
| 1.00 | 1.00 | 4.20 | 0.84 | 1.00 | 2.00 | 0.00 | 3.00 | 1.00 |
| 0.00 | 2.00 | 3.76 | 0.47 | 2.00 | 5.00 | 1.00 | 3.00 | 0.00 |
| 0.00 | 2.00 | 6.00 | 0.40 | 3.00 | 5.00 | 1.00 | 2.00 | 3.00 |
| 1.00 | 2.00 | 4.71 | 0.59 | 2.00 | 4.00 | 1.00 | 2.00 | 0.00 |
| 1.00 | 3.00 | 4.90 | 0.41 | 3.00 | 5.00 | 1.00 | 3.00 | 3.00 |
| 1.00 | 2.00 | 4.90 | 0.61 | 2.00 | 4.00 | 1.00 | 2.00 | 0.00 |
| 1.00 | 1.00 | 6.00 | 0.60 | 2.00 | 3.00 | 0.00 | 3.00 | 2.00 |
| 1.00 | 2.00 | 7.30 | 0.66 | 2.00 | 3.00 | 0.00 | 3.00 | 2.00 |
| 0.00 | 2.00 | 7.40 | 1.23 | 2.00 | 5.00 | 1.00 | 3.00 | 0.00 |
| 1.00 | 3.00 | 1.10 | 0.28 | 1.00 | 0.00 | 0.00 | 3.00 | 1.00 |
| 0.00 | 2.00 | 2.75 | 0.55 | 1.00 | 0.00 | 0.00 | 2.00 | 0.00 |
| 0.00 | 1.00 | 9.80 | 0.41 | 3.00 | 7.00 | 1.00 | 3.00 | 3.00 |
| 0.00 | 2.00 | 7.30 | 0.30 | 3.00 | 4.00 | 1.00 | 3.00 | 3.00 |
| 1.00 | 2.00 | 4.80 | 0.69 | 2.00 | 4.00 | 1.00 | 3.00 | 0.00 |
| 1.00 | 1.00 | 9.10 | 0.38 | 3.00 | 5.00 | 1.00 | 2.00 | 3.00 |
| 0.00 | 2.00 | 1.88 | 0.63 | 1.00 | 3.00 | 0.00 | 3.00 | 0.00 |
| 2.00 | 1.00 | 5.80 | 0.83 | 2.00 | 2.00 | 0.00 | 2.00 | 2.00 |
| 2.00 | 1.00 | 3.80 | 0.63 | 2.00 | 2.00 | 0.00 | 2.00 | 0.00 |
| 2.00 | 1.00 | 3.40 | 0.85 | 1.00 | 0.00 | 0.00 | 1.00 | 0.00 |
| 0.00 | 1.00 | 2.40 | 0.80 | 1.00 | 0.00 | 0.00 | 3.00 | 1.00 |
| 2.00 | 3.00 | 5.00 | 0.63 | 2.00 | 7.00 | 1.00 | 3.00 | 0.00 |
| 1.00 | 1.00 | 6.80 | 0.28 | 3.00 | 6.00 | 1.00 | 3.00 | 3.00 |
| 2.00 | 1.00 | 5.70 | 0.63 | 2.00 | 4.00 | 1.00 | 2.00 | 0.00 |
| 1.00 | 1.00 | 1.30 | 0.65 | 1.00 | 0.00 | 0.00 | 3.00 | 1.00 |
| 1.00 | 3.00 | 2.60 | 0.65 | 1.00 | 0.00 | 0.00 | 3.00 | 0.00 |
| 2.00 | 1.00 | 6.10 | 1.53 | 1.00 | 3.00 | 0.00 | 3.00 | 0.00 |
| 1.00 | 2.00 | 5.80 | 0.29 | 3.00 | 7.00 | 1.00 | 3.00 | 3.00 |
| 1.00 | 2.00 | 3.40 | 0.85 | 1.00 | 0.00 | 0.00 | 3.00 | 0.00 |
| 1.00 | 3.00 | 3.50 | 1.75 | 1.00 | 0.00 | 0.00 | 2.00 | 1.00 |
| 2.00 | 1.00 | 4.70 | 0.67 | 2.00 | 4.00 | 1.00 | 2.00 | 2.00 |
| 1.00 | 1.00 | 4.20 | 0.70 | 2.00 | 2.00 | 0.00 | 2.00 | 0.00 |
| 1.00 | 2.00 | 6.10 | 0.51 | 3.00 | 5.00 | 1.00 | 3.00 | 0.00 |
| 1.00 | 2.00 | 8.10 | 0.58 | 3.00 | 3.00 | 0.00 | 2.00 | 3.00 |
| 1.00 | 2.00 | 2.40 | 0.34 | 2.00 | 6.00 | 1.00 | 2.00 | 0.00 |
| 2.00 | 2.00 | 6.80 | 0.68 | 2.00 | 4.00 | 1.00 | 2.00 | 0.00 |
| 0.00 | 2.00 | 9.50 | 0.40 | 3.00 | 4.00 | 1.00 | 2.00 | 3.00 |
| 1.00 | 2.00 | 5.50 | 0.42 | 3.00 | 4.00 | 1.00 | 2.00 | 0.00 |
| 2.00 | 2.00 | 4.10 | 1.37 | 1.00 | 0.00 | 0.00 | 2.00 | 1.00 |
| 1.00 | 2.00 | 3.80 | 0.76 | 1.00 | 2.00 | 0.00 | 2.00 | 1.00 |

|      |      |      |      |      |      |      |      |      |
|------|------|------|------|------|------|------|------|------|
| 1.00 | 1.00 | 4.20 | 0.84 | 1.00 | 0.00 | 0.00 | 2.00 | 0.00 |
| 1.00 | 2.00 | 3.80 | 0.76 | 1.00 | 0.00 | 0.00 | 2.00 | 0.00 |
| 1.00 | 2.00 | 3.90 | 0.65 | 2.00 | 1.00 | 0.00 | 3.00 | 0.00 |
| 1.00 | 2.00 | 6.40 | 0.32 | 3.00 | 5.00 | 1.00 | 3.00 | 3.00 |
| 1.00 | 2.00 | 4.00 | 0.80 | 1.00 | 0.00 | 0.00 | 3.00 | 0.00 |
| 1.00 | 1.00 | 4.01 | 1.00 | 1.00 | 0.00 | 0.00 | 2.00 | 1.00 |
| 1.00 | 2.00 | 6.20 | 0.69 | 2.00 | 1.00 | 0.00 | 2.00 | 2.00 |
| 0.00 | 2.00 | 5.30 | 0.53 | 2.00 | 3.00 | 0.00 | 2.00 | 0.00 |
| 1.00 | 1.00 | 4.60 | 0.38 | 3.00 | 4.00 | 1.00 | 3.00 | 3.00 |
| 2.00 | 1.00 | 6.50 | 0.54 | 3.00 | 7.00 | 1.00 | 3.00 | 0.00 |
| 2.00 | 1.00 | 5.90 | 0.39 | 3.00 | 4.00 | 1.00 | 3.00 | 3.00 |
| 1.00 | 1.00 | 6.10 | 0.61 | 2.00 | 3.00 | 0.00 | 2.00 | 0.00 |
| 2.00 | 1.00 | 2.40 | 0.80 | 1.00 | 0.00 | 0.00 | 2.00 | 1.00 |
| 1.00 | 1.00 | 5.80 | 0.64 | 2.00 | 3.00 | 0.00 | 2.00 | 0.00 |
| 1.00 | 2.00 | 5.90 | 0.45 | 3.00 | 2.00 | 0.00 | 3.00 | 0.00 |
| 1.00 | 1.00 | 2.80 | 1.40 | 1.00 | 0.00 | 0.00 | 3.00 | 1.00 |
| 1.00 | 2.00 | 7.60 | 0.84 | 2.00 | 4.00 | 1.00 | 2.00 | 0.00 |
| 0.00 | 2.00 | 6.50 | 0.31 | 3.00 | 3.00 | 0.00 | 3.00 | 3.00 |
| 0.00 | 2.00 | 4.60 | 0.42 | 2.00 | 5.00 | 1.00 | 3.00 | 0.00 |
| 0.00 | 2.00 | 7.50 | 0.58 | 3.00 | 4.00 | 1.00 | 3.00 | 3.00 |
| 1.00 | 2.00 | 5.30 | 0.88 | 2.00 | 4.00 | 1.00 | 3.00 | 0.00 |
| 0.00 | 2.00 | 6.60 | 0.94 | 2.00 | 2.00 | 0.00 | 3.00 | 0.00 |
| 0.00 | 2.00 | 5.50 | 0.37 | 3.00 | 4.00 | 1.00 | 2.00 | 0.00 |
| 1.00 | 2.00 | 3.70 | 0.46 | 2.00 | 6.00 | 1.00 | 3.00 | 2.00 |
| 0.00 | 2.00 | 5.31 | 0.66 | 2.00 | 1.00 | 0.00 | 2.00 | 0.00 |
| 1.00 | 2.00 | 4.50 | 0.41 | 2.00 | 3.00 | 0.00 | 3.00 | 0.00 |
| 0.00 | 2.00 | 5.10 | 0.64 | 2.00 | 1.00 | 0.00 | 2.00 | 2.00 |
| 1.00 | 2.00 | 5.80 | 0.53 | 2.00 | 3.00 | 0.00 | 3.00 | 0.00 |
| 0.00 | 2.00 | 4.20 | 1.05 | 1.00 | 0.00 | 0.00 | 3.00 | 1.00 |
| 1.00 | 1.00 | 4.30 | 0.72 | 2.00 | 1.00 | 0.00 | 3.00 | 0.00 |
| 0.00 | 1.00 | 7.60 | 0.35 | 3.00 | 4.00 | 1.00 | 3.00 | 3.00 |
| 1.00 | 2.00 | 4.90 | 0.35 | 3.00 | 2.00 | 0.00 | 2.00 | 0.00 |
| 0.00 | 2.00 | 2.50 | 0.50 | 1.00 | 0.00 | 0.00 | 3.00 | 1.00 |
| 1.00 | 2.00 | 6.70 | 0.28 | 3.00 | 5.00 | 1.00 | 2.00 | 3.00 |
| 1.00 | 2.00 | 6.29 | 0.90 | 2.00 | 3.00 | 0.00 | 2.00 | 0.00 |
| 1.00 | 1.00 | 4.00 | 0.80 | 1.00 | 4.00 | 1.00 | 3.00 | 0.00 |
| 0.00 | 2.00 | 8.32 | 0.35 | 3.00 | 4.00 | 1.00 | 3.00 | 3.00 |
| 1.00 | 3.00 | 7.30 | 0.81 | 2.00 | 7.00 | 1.00 | 3.00 | 0.00 |
| 1.00 | 1.00 | 3.70 | 1.23 | 1.00 | 0.00 | 0.00 | 2.00 | 0.00 |
| 0.00 | 1.00 | 8.30 | 0.35 | 3.00 | 5.00 | 1.00 | 3.00 | 3.00 |
| 2.00 | 1.00 | 7.00 | 0.29 | 3.00 | 4.00 | 1.00 | 3.00 | 3.00 |
| 2.00 | 1.00 | 5.80 | 1.16 | 1.00 | 0.00 | 0.00 | 2.00 | 0.00 |
| 1.00 | 2.00 | 4.30 | 0.72 | 2.00 | 1.00 | 0.00 | 3.00 | 2.00 |
| 1.00 | 1.00 | 4.90 | 0.82 | 2.00 | 3.00 | 0.00 | 3.00 | 2.00 |
| 1.00 | 1.00 | 5.40 | 0.60 | 2.00 | 3.00 | 0.00 | 2.00 | 0.00 |
| 1.00 | 1.00 | 5.90 | 0.45 | 3.00 | 5.00 | 1.00 | 3.00 | 3.00 |
| 1.00 | 2.00 | 6.40 | 0.27 | 3.00 | 2.00 | 0.00 | 2.00 | 3.00 |

|      |      |       |      |      |      |      |      |      |
|------|------|-------|------|------|------|------|------|------|
| 0.00 | 1.00 | 2.60  | 0.87 | 1.00 | 0.00 | 0.00 | 2.00 | 0.00 |
| 1.00 | 2.00 | 4.60  | 0.92 | 1.00 | 1.00 | 0.00 | 3.00 | 1.00 |
| 1.00 | 1.00 | 1.70  | 0.57 | 1.00 | 0.00 | 0.00 | 3.00 | 0.00 |
| 2.00 | 1.00 | 2.70  | 0.45 | 2.00 | 4.00 | 1.00 | 2.00 | 2.00 |
| 2.00 | 1.00 | 5.80  | 0.41 | 3.00 | 4.00 | 1.00 | 2.00 | 3.00 |
| 1.00 | 1.00 | 6.10  | 0.68 | 2.00 | 3.00 | 0.00 | 2.00 | 0.00 |
| 1.00 | 2.00 | 7.20  | 1.20 | 2.00 | 3.00 | 0.00 | 3.00 | 0.00 |
| 0.00 | 1.00 | 4.00  | 0.80 | 1.00 | 0.00 | 0.00 | 2.00 | 1.00 |
| 1.00 | 1.00 | 5.40  | 0.45 | 3.00 | 5.00 | 1.00 | 2.00 | 0.00 |
| 1.00 | 1.00 | 4.00  | 1.33 | 1.00 | 0.00 | 0.00 | 2.00 | 1.00 |
| 1.00 | 2.00 | 5.90  | 0.54 | 2.00 | 3.00 | 0.00 | 2.00 | 0.00 |
| 1.00 | 1.00 | 5.90  | 0.33 | 3.00 | 4.00 | 1.00 | 2.00 | 3.00 |
| 1.00 | 1.00 | 5.30  | 0.76 | 2.00 | 4.00 | 1.00 | 2.00 | 0.00 |
| 1.00 | 1.00 | 5.70  | 0.29 | 3.00 | 6.00 | 1.00 | 2.00 | 3.00 |
| 1.00 | 2.00 | 5.20  | 0.43 | 3.00 | 2.00 | 0.00 | 3.00 | 0.00 |
| 0.00 | 1.00 | 11.00 | 0.48 | 3.00 | 4.00 | 1.00 | 3.00 | 3.00 |
| 2.00 | 3.00 | 5.30  | 0.48 | 2.00 | 4.00 | 1.00 | 3.00 | 2.00 |
| 1.00 | 1.00 | 5.20  | 1.73 | 1.00 | 0.00 | 0.00 | 2.00 | 0.00 |
| 1.00 | 3.00 | 3.50  | 1.75 | 1.00 | 0.00 | 0.00 | 3.00 | 1.00 |
| 1.00 | 1.00 | 5.90  | 0.54 | 2.00 | 4.00 | 1.00 | 2.00 | 2.00 |
| 1.00 | 1.00 | 6.40  | 0.64 | 2.00 | 2.00 | 0.00 | 2.00 | 0.00 |
| 1.00 | 1.00 | 5.50  | 0.42 | 3.00 | 4.00 | 1.00 | 3.00 | 3.00 |
| 2.00 | 3.00 | 3.80  | 0.48 | 2.00 | 6.00 | 1.00 | 2.00 | 2.00 |
| 1.00 | 1.00 | 2.70  | 0.68 | 1.00 | 4.00 | 1.00 | 3.00 | 0.00 |
| 1.00 | 1.00 | 3.10  | 1.55 | 1.00 | 0.00 | 0.00 | 3.00 | 0.00 |
| 1.00 | 1.00 | 4.30  | 0.86 | 1.00 | 3.00 | 0.00 | 3.00 | 1.00 |
| 1.00 | 2.00 | 5.80  | 0.53 | 2.00 | 6.00 | 1.00 | 2.00 | 0.00 |
| 1.00 | 1.00 | 4.40  | 0.40 | 2.00 | 6.00 | 1.00 | 3.00 | 2.00 |
| 2.00 | 1.00 | 3.40  | 0.68 | 1.00 | 0.00 | 0.00 | 3.00 | 1.00 |
| 1.00 | 1.00 | 6.90  | 0.30 | 3.00 | 6.00 | 1.00 | 3.00 | 0.00 |
| 1.00 | 2.00 | 2.60  | 1.30 | 1.00 | 0.00 | 0.00 | 3.00 | 0.00 |
| 2.00 | 2.00 | 4.30  | 0.86 | 1.00 | 6.00 | 1.00 | 2.00 | 0.00 |
| 2.00 | 2.00 | 3.80  | 0.38 | 2.00 | 4.00 | 1.00 | 2.00 | 2.00 |
| 0.00 | 1.00 | 5.00  | 0.31 | 3.00 | 3.00 | 0.00 | 3.00 | 3.00 |
| 1.00 | 1.00 | 4.50  | 0.56 | 2.00 | 4.00 | 1.00 | 3.00 | 0.00 |
| 1.00 | 1.00 | 6.40  | 0.71 | 2.00 | 5.00 | 1.00 | 3.00 | 2.00 |
| 1.00 | 1.00 | 6.70  | 0.52 | 3.00 | 5.00 | 1.00 | 3.00 | 0.00 |
| 1.00 | 1.00 | 6.40  | 0.58 | 2.00 | 4.00 | 1.00 | 2.00 | 0.00 |
| 0.00 | 2.00 | 5.10  | 0.85 | 2.00 | 1.00 | 0.00 | 3.00 | 0.00 |
| 1.00 | 1.00 | 7.90  | 0.44 | 3.00 | 4.00 | 1.00 | 2.00 | 3.00 |
| 1.00 | 1.00 | 4.70  | 0.43 | 2.00 | 3.00 | 0.00 | 3.00 | 2.00 |
| 1.00 | 2.00 | 3.50  | 0.58 | 2.00 | 0.00 | 0.00 | 2.00 | 0.00 |
| 1.00 | 2.00 | 4.90  | 0.45 | 2.00 | 3.00 | 0.00 | 3.00 | 2.00 |
| 0.00 | 2.00 | 6.90  | 0.63 | 2.00 | 4.00 | 1.00 | 3.00 | 2.00 |
| 2.00 | 1.00 | 3.50  | 0.44 | 2.00 | 3.00 | 0.00 | 3.00 | 2.00 |
| 1.00 | 2.00 | 2.90  | 0.73 | 1.00 | 0.00 | 0.00 | 3.00 | 0.00 |
| 0.00 | 2.00 | 5.90  | 0.74 | 2.00 | 3.00 | 0.00 | 3.00 | 0.00 |

|      |      |      |      |      |      |      |      |      |
|------|------|------|------|------|------|------|------|------|
| 2.00 | 1.00 | 6.00 | 0.38 | 3.00 | 4.00 | 1.00 | 2.00 | 3.00 |
| 1.00 | 1.00 | 5.80 | 1.16 | 1.00 | 3.00 | 0.00 | 3.00 | 0.00 |
| 1.00 | 2.00 | 5.10 | 0.85 | 2.00 | 1.00 | 0.00 | 3.00 | 2.00 |
| 1.00 | 1.00 | 2.50 | 0.42 | 2.00 | 3.00 | 0.00 | 2.00 | 2.00 |
| 0.00 | 1.00 | 4.90 | 0.38 | 3.00 | 4.00 | 1.00 | 2.00 | 0.00 |
| 1.00 | 1.00 | 7.60 | 0.40 | 3.00 | 6.00 | 1.00 | 2.00 | 3.00 |
| 2.00 | 3.00 | 5.70 | 0.44 | 3.00 | 2.00 | 0.00 | 2.00 | 0.00 |
| 1.00 | 1.00 | 4.20 | 1.40 | 1.00 | 3.00 | 0.00 | 2.00 | 0.00 |
| 1.00 | 3.00 | 6.50 | 0.41 | 3.00 | 5.00 | 1.00 | 2.00 | 3.00 |
| 2.00 | 1.00 | 4.40 | 0.55 | 2.00 | 4.00 | 1.00 | 2.00 | 0.00 |
| 1.00 | 3.00 | 5.90 | 0.84 | 2.00 | 6.00 | 1.00 | 3.00 | 0.00 |
| 1.00 | 1.00 | 4.80 | 0.96 | 1.00 | 0.00 | 0.00 | 3.00 | 1.00 |
| 1.00 | 1.00 | 4.40 | 0.44 | 2.00 | 7.00 | 1.00 | 2.00 | 0.00 |
| 1.00 | 3.00 | 6.30 | 0.90 | 2.00 | 7.00 | 1.00 | 3.00 | 0.00 |
| 1.00 | 3.00 | 6.00 | 0.46 | 3.00 | 7.00 | 1.00 | 3.00 | 0.00 |
| 1.00 | 3.00 | 6.60 | 0.39 | 3.00 | 7.00 | 1.00 | 2.00 | 0.00 |
| 2.00 | 3.00 | 3.60 | 0.72 | 1.00 | 0.00 | 0.00 | 3.00 | 1.00 |
| 1.00 | 3.00 | 2.40 | 0.80 | 1.00 | 7.00 | 1.00 | 3.00 | 0.00 |
| 1.00 | 3.00 | 5.10 | 0.57 | 2.00 | 7.00 | 1.00 | 3.00 | 2.00 |
| 0.00 | 2.00 | 4.80 | 0.27 | 3.00 | 7.00 | 1.00 | 3.00 | 3.00 |
| 2.00 | 2.00 | 7.40 | 0.67 | 2.00 | 6.00 | 1.00 | 2.00 | 0.00 |
| 2.00 | 3.00 | 7.50 | 0.31 | 3.00 | 4.00 | 1.00 | 2.00 | 3.00 |
| 1.00 | 3.00 | 6.90 | 0.29 | 3.00 | 5.00 | 1.00 | 2.00 | 0.00 |
| 1.00 | 1.00 | 0.60 | 0.30 | 1.00 | 0.00 | 0.00 | 3.00 | 0.00 |
| 1.00 | 1.00 | 5.80 | 0.64 | 2.00 | 3.00 | 0.00 | 2.00 | 0.00 |
| 1.00 | 1.00 | 5.00 | 0.63 | 2.00 | 5.00 | 1.00 | 3.00 | 2.00 |
| 1.00 | 1.00 | 2.50 | 1.25 | 1.00 | 0.00 | 0.00 | 3.00 | 1.00 |
| 0.00 | 1.00 | 1.30 | 0.33 | 1.00 | 0.00 | 0.00 | 3.00 | 0.00 |
| 1.00 | 1.00 | 1.60 | 0.80 | 1.00 | 0.00 | 0.00 | 2.00 | 1.00 |
| 1.00 | 1.00 | 5.20 | 1.30 | 1.00 | 3.00 | 0.00 | 2.00 | 0.00 |
| 0.00 | 1.00 | 6.50 | 0.54 | 3.00 | 3.00 | 0.00 | 2.00 | 0.00 |
| 2.00 | 3.00 | 8.60 | 1.23 | 2.00 | 3.00 | 0.00 | 1.00 | 0.00 |
| 0.00 | 1.00 | 2.40 | 0.14 | 3.00 | 6.00 | 1.00 | 3.00 | 0.00 |
| 1.00 | 2.00 | 1.90 | 0.48 | 1.00 | 0.00 | 0.00 | 3.00 | 1.00 |
| 1.00 | 2.00 | 3.90 | 0.78 | 1.00 | 0.00 | 0.00 | 3.00 | 1.00 |
| 2.00 | 1.00 | 6.50 | 0.46 | 3.00 | 4.00 | 1.00 | 3.00 | 0.00 |
| 2.00 | 2.00 | 5.10 | 1.02 | 1.00 | 0.00 | 0.00 | 1.00 | 0.00 |
| 2.00 | 3.00 | 3.00 | 0.60 | 1.00 | 0.00 | 0.00 | 2.00 | 0.00 |
| 2.00 | 3.00 | 4.50 | 1.13 | 1.00 | 3.00 | 0.00 | 3.00 | 0.00 |
| 1.00 | 1.00 | 2.60 | 0.65 | 1.00 | 0.00 | 0.00 | 1.00 | 0.00 |
| 0.00 | 2.00 | 9.30 | 0.40 | 3.00 | 4.00 | 1.00 | 3.00 | 3.00 |
| 2.00 | 3.00 | 3.90 | 0.49 | 2.00 | 5.00 | 1.00 | 2.00 | 0.00 |
| 2.00 | 2.00 | 5.60 | 0.51 | 2.00 | 3.00 | 0.00 | 2.00 | 2.00 |
| 2.00 | 1.00 | 5.70 | 0.63 | 2.00 | 4.00 | 1.00 | 2.00 | 2.00 |
| 1.00 | 1.00 | 2.50 | 0.83 | 1.00 | 0.00 | 0.00 | 2.00 | 0.00 |
| 0.00 | 1.00 | 7.50 | 0.83 | 2.00 | 5.00 | 1.00 | 2.00 | 0.00 |
| 2.00 | 3.00 | 5.20 | 0.65 | 2.00 | 2.00 | 0.00 | 2.00 | 0.00 |



|      |      |      |      |      |      |      |      |      |
|------|------|------|------|------|------|------|------|------|
| 2.00 | 3.00 | 5.40 | 0.36 | 3.00 | 6.00 | 1.00 | 2.00 | 3.00 |
| 2.00 | 3.00 | 5.00 | 0.42 | 3.00 | 6.00 | 1.00 | 2.00 | 3.00 |
| 2.00 | 3.00 | 6.70 | 1.12 | 2.00 | 5.00 | 1.00 | 2.00 | 0.00 |
| 0.00 | 1.00 | 4.60 | 0.26 | 3.00 | 5.00 | 1.00 | 3.00 | 3.00 |
| 1.00 | 2.00 | 2.70 | 1.35 | 1.00 | 0.00 | 0.00 | 1.00 | 0.00 |
| 2.00 | 3.00 | 7.20 | 0.31 | 3.00 | 6.00 | 1.00 | 3.00 | 3.00 |
| 1.00 | 1.00 | 4.70 | 0.67 | 2.00 | 1.00 | 0.00 | 3.00 | 0.00 |
| 0.00 | 1.00 | 5.20 | 0.40 | 3.00 | 4.00 | 1.00 | 3.00 | 3.00 |
| 1.00 | 2.00 | 5.86 | 0.65 | 2.00 | 4.00 | 1.00 | 3.00 | 0.00 |
| 0.00 | 2.00 | 1.20 | 0.24 | 1.00 | 0.00 | 0.00 | 3.00 | 1.00 |
| 0.00 | 1.00 | 4.60 | 0.92 | 1.00 | 4.00 | 1.00 | 3.00 | 0.00 |
| 0.00 | 1.00 | 2.80 | 1.40 | 1.00 | 0.00 | 0.00 | 3.00 | 1.00 |
| 0.00 | 2.00 | 6.50 | 0.93 | 2.00 | 4.00 | 1.00 | 3.00 | 0.00 |
| 0.00 | 2.00 | 4.90 | 0.45 | 2.00 | 6.00 | 1.00 | 3.00 | 2.00 |
| 0.00 | 2.00 | 3.80 | 1.90 | 1.00 | 0.00 | 0.00 | 3.00 | 0.00 |
| 1.00 | 2.00 | 4.70 | 0.39 | 3.00 | 5.00 | 1.00 | 1.00 | 3.00 |
| 1.00 | 2.00 | 8.10 | 0.90 | 2.00 | 5.00 | 1.00 | 3.00 | 0.00 |
| 2.00 | 3.00 | 5.30 | 0.66 | 2.00 | 5.00 | 1.00 | 2.00 | 0.00 |
| 1.00 | 2.00 | 7.60 | 1.27 | 2.00 | 5.00 | 1.00 | 3.00 | 0.00 |
| 1.00 | 2.00 | 3.70 | 0.62 | 2.00 | 0.00 | 0.00 | 2.00 | 2.00 |
| 2.00 | 2.00 | 4.40 | 0.55 | 2.00 | 4.00 | 1.00 | 3.00 | 0.00 |
| 2.00 | 1.00 | 6.80 | 0.52 | 3.00 | 6.00 | 1.00 | 3.00 | 3.00 |
| 1.00 | 1.00 | 4.60 | 0.46 | 2.00 | 6.00 | 1.00 | 2.00 | 0.00 |
| 1.00 | 1.00 | 2.60 | 0.87 | 1.00 | 0.00 | 0.00 | 2.00 | 0.00 |
| 2.00 | 1.00 | 6.90 | 0.38 | 3.00 | 4.00 | 1.00 | 3.00 | 3.00 |
| 1.00 | 1.00 | 4.00 | 0.67 | 2.00 | 5.00 | 1.00 | 2.00 | 0.00 |
| 1.00 | 2.00 | 5.80 | 0.64 | 2.00 | 4.00 | 1.00 | 3.00 | 0.00 |
| 1.00 | 1.00 | 1.80 | 0.90 | 1.00 | 0.00 | 0.00 | 2.00 | 0.00 |
| 1.00 | 1.00 | 3.90 | 0.78 | 1.00 | 0.00 | 0.00 | 2.00 | 1.00 |
| 2.00 | 1.00 | 6.80 | 0.32 | 3.00 | 6.00 | 1.00 | 3.00 | 3.00 |
| 1.00 | 2.00 | 7.20 | 1.03 | 2.00 | 4.00 | 1.00 | 2.00 | 0.00 |
| 2.00 | 2.00 | 6.90 | 0.46 | 3.00 | 4.00 | 1.00 | 2.00 | 0.00 |
| 1.00 | 2.00 | 3.50 | 1.75 | 1.00 | 0.00 | 0.00 | 2.00 | 1.00 |
| 1.00 | 2.00 | 6.90 | 0.31 | 3.00 | 4.00 | 1.00 | 3.00 | 3.00 |
| 0.00 | 2.00 | 4.20 | 1.05 | 1.00 | 3.00 | 0.00 | 3.00 | 0.00 |
| 1.00 | 2.00 | 3.90 | 0.98 | 1.00 | 0.00 | 0.00 | 2.00 | 0.00 |
| 1.00 | 1.00 | 9.30 | 0.39 | 3.00 | 4.00 | 1.00 | 2.00 | 3.00 |
| 2.00 | 2.00 | 3.30 | 1.65 | 1.00 | 0.00 | 0.00 | 2.00 | 0.00 |
| 0.00 | 2.00 | 4.20 | 1.05 | 1.00 | 0.00 | 0.00 | 3.00 | 1.00 |
| 1.00 | 2.00 | 1.30 | 0.65 | 1.00 | 0.00 | 0.00 | 2.00 | 0.00 |
| 1.00 | 2.00 | 9.10 | 0.38 | 3.00 | 5.00 | 1.00 | 3.00 | 3.00 |
| 0.00 | 2.00 | 5.80 | 0.73 | 2.00 | 5.00 | 1.00 | 3.00 | 0.00 |
| 1.00 | 2.00 | 4.30 | 0.54 | 2.00 | 4.00 | 1.00 | 2.00 | 0.00 |
| 0.00 | 2.00 | 7.10 | 0.34 | 3.00 | 4.00 | 1.00 | 3.00 | 3.00 |
| 0.00 | 1.00 | 3.80 | 0.54 | 2.00 | 7.00 | 1.00 | 2.00 | 2.00 |
| 0.00 | 2.00 | 5.10 | 0.39 | 3.00 | 4.00 | 1.00 | 3.00 | 0.00 |
| 1.00 | 1.00 | 4.60 | 0.58 | 2.00 | 6.00 | 1.00 | 3.00 | 2.00 |

|      |      |       |      |      |      |      |      |      |
|------|------|-------|------|------|------|------|------|------|
| 0.00 | 2.00 | 6.80  | 0.68 | 2.00 | 2.00 | 0.00 | 2.00 | 0.00 |
| 1.00 | 2.00 | 5.30  | 0.41 | 3.00 | 4.00 | 1.00 | 2.00 | 3.00 |
| 0.00 | 2.00 | 6.40  | 0.58 | 2.00 | 3.00 | 0.00 | 3.00 | 0.00 |
| 1.00 | 2.00 | 6.30  | 0.57 | 2.00 | 4.00 | 1.00 | 3.00 | 2.00 |
| 2.00 | 2.00 | 4.30  | 0.33 | 3.00 | 1.00 | 0.00 | 2.00 | 3.00 |
| 0.00 | 2.00 | 2.60  | 0.87 | 1.00 | 0.00 | 0.00 | 3.00 | 0.00 |
| 0.00 | 2.00 | 4.70  | 0.52 | 2.00 | 6.00 | 1.00 | 3.00 | 0.00 |
| 1.00 | 2.00 | 5.70  | 0.41 | 3.00 | 7.00 | 1.00 | 3.00 | 3.00 |
| 2.00 | 2.00 | 4.40  | 0.88 | 1.00 | 7.00 | 1.00 | 2.00 | 0.00 |
| 0.00 | 2.00 | 5.70  | 0.81 | 2.00 | 6.00 | 1.00 | 3.00 | 2.00 |
| 0.00 | 2.00 | 7.00  | 0.54 | 3.00 | 7.00 | 1.00 | 3.00 | 3.00 |
| 1.00 | 2.00 | 5.00  | 0.50 | 2.00 | 7.00 | 1.00 | 3.00 | 2.00 |
| 1.00 | 2.00 | 6.10  | 0.61 | 2.00 | 7.00 | 1.00 | 3.00 | 0.00 |
| 0.00 | 1.00 | 8.00  | 0.89 | 2.00 | 7.00 | 1.00 | 3.00 | 0.00 |
| 0.00 | 1.00 | 4.10  | 1.37 | 1.00 | 0.00 | 0.00 | 3.00 | 1.00 |
| 1.00 | 2.00 | 4.90  | 0.70 | 2.00 | 7.00 | 1.00 | 2.00 | 2.00 |
| 0.00 | 2.00 | 3.80  | 0.76 | 1.00 | 0.00 | 0.00 | 3.00 | 1.00 |
| 0.00 | 2.00 | 6.10  | 0.55 | 2.00 | 7.00 | 1.00 | 3.00 | 0.00 |
| 1.00 | 2.00 | 3.60  | 0.72 | 1.00 | 0.00 | 0.00 | 2.00 | 0.00 |
| 1.00 | 2.00 | 4.00  | 1.33 | 1.00 | 0.00 | 0.00 | 2.00 | 1.00 |
| 0.00 | 2.00 | 7.70  | 0.86 | 2.00 | 7.00 | 1.00 | 2.00 | 0.00 |
| 1.00 | 3.00 | 4.40  | 0.22 | 3.00 | 7.00 | 1.00 | 3.00 | 3.00 |
| 1.00 | 2.00 | 6.20  | 0.34 | 3.00 | 3.00 | 0.00 | 3.00 | 3.00 |
| 1.00 | 2.00 | 3.00  | 1.50 | 1.00 | 0.00 | 0.00 | 2.00 | 0.00 |
| 0.00 | 2.00 | 2.20  | 0.55 | 1.00 | 0.00 | 0.00 | 3.00 | 1.00 |
| 0.00 | 2.00 | 6.50  | 1.63 | 1.00 | 0.00 | 0.00 | 3.00 | 0.00 |
| 1.00 | 2.00 | 4.30  | 0.48 | 2.00 | 4.00 | 1.00 | 2.00 | 0.00 |
| 1.00 | 2.00 | 2.30  | 0.77 | 1.00 | 0.00 | 0.00 | 3.00 | 1.00 |
| 1.00 | 2.00 | 8.30  | 0.35 | 3.00 | 4.00 | 1.00 | 2.00 | 3.00 |
| 1.00 | 2.00 | 3.00  | 1.50 | 1.00 | 0.00 | 0.00 | 3.00 | 0.00 |
| 0.00 | 2.00 | 6.30  | 0.90 | 2.00 | 4.00 | 1.00 | 1.00 | 0.00 |
| 1.00 | 2.00 | 7.80  | 0.33 | 3.00 | 5.00 | 1.00 | 2.00 | 3.00 |
| 2.00 | 1.00 | 8.20  | 0.34 | 3.00 | 4.00 | 1.00 | 3.00 | 3.00 |
| 0.00 | 1.00 | 7.30  | 0.66 | 2.00 | 5.00 | 1.00 | 3.00 | 0.00 |
| 1.00 | 1.00 | 10.20 | 0.43 | 3.00 | 5.00 | 1.00 | 3.00 | 3.00 |
| 1.00 | 2.00 | 6.40  | 0.53 | 3.00 | 1.00 | 0.00 | 3.00 | 3.00 |
| 0.00 | 1.00 | 4.50  | 0.50 | 2.00 | 6.00 | 1.00 | 3.00 | 0.00 |
| 1.00 | 1.00 | 4.60  | 0.35 | 3.00 | 4.00 | 1.00 | 2.00 | 3.00 |
| 0.00 | 1.00 | 1.80  | 0.60 | 1.00 | 0.00 | 0.00 | 3.00 | 0.00 |
| 0.00 | 1.00 | 10.00 | 0.48 | 3.00 | 6.00 | 1.00 | 3.00 | 3.00 |
| 0.00 | 2.00 | 8.50  | 0.94 | 2.00 | 2.00 | 0.00 | 3.00 | 0.00 |
| 0.00 | 2.00 | 5.60  | 0.93 | 2.00 | 2.00 | 0.00 | 3.00 | 0.00 |
| 0.00 | 2.00 | 8.10  | 0.35 | 3.00 | 5.00 | 1.00 | 3.00 | 3.00 |
| 2.00 | 2.00 | 3.30  | 0.83 | 1.00 | 0.00 | 0.00 | 2.00 | 0.00 |
| 0.00 | 2.00 | 1.30  | 0.65 | 1.00 | 0.00 | 0.00 | 3.00 | 1.00 |
| 0.00 | 2.00 | 3.90  | 0.78 | 1.00 | 5.00 | 1.00 | 3.00 | 0.00 |
| 1.00 | 2.00 | 10.70 | 0.49 | 3.00 | 5.00 | 1.00 | 3.00 | 3.00 |

|      |      |       |      |      |      |      |      |      |
|------|------|-------|------|------|------|------|------|------|
| 1.00 | 2.00 | 7.30  | 0.30 | 3.00 | 5.00 | 1.00 | 3.00 | 3.00 |
| 0.00 | 1.00 | 7.10  | 0.89 | 2.00 | 5.00 | 1.00 | 3.00 | 0.00 |
| 0.00 | 3.00 | 4.40  | 0.63 | 2.00 | 5.00 | 1.00 | 3.00 | 0.00 |
| 0.00 | 2.00 | 6.10  | 1.53 | 1.00 | 5.00 | 1.00 | 3.00 | 0.00 |
| 1.00 | 2.00 | 9.90  | 0.41 | 3.00 | 2.00 | 0.00 | 2.00 | 3.00 |
| 1.00 | 3.00 | 5.80  | 0.53 | 2.00 | 2.00 | 0.00 | 3.00 | 0.00 |
| 0.00 | 1.00 | 7.10  | 0.51 | 3.00 | 3.00 | 0.00 | 3.00 | 3.00 |
| 1.00 | 2.00 | 5.50  | 0.55 | 2.00 | 4.00 | 1.00 | 3.00 | 0.00 |
| 1.00 | 2.00 | 6.10  | 0.31 | 3.00 | 5.00 | 1.00 | 3.00 | 3.00 |
| 1.00 | 2.00 | 4.10  | 0.51 | 2.00 | 5.00 | 1.00 | 3.00 | 0.00 |
| 0.00 | 2.00 | 10.50 | 0.46 | 3.00 | 4.00 | 1.00 | 3.00 | 3.00 |
| 1.00 | 1.00 | 3.90  | 0.78 | 1.00 | 5.00 | 1.00 | 3.00 | 0.00 |
| 0.00 | 1.00 | 5.60  | 0.62 | 2.00 | 5.00 | 1.00 | 3.00 | 0.00 |
| 0.00 | 3.00 | 5.60  | 1.12 | 1.00 | 0.00 | 0.00 | 3.00 | 1.00 |
| 1.00 | 3.00 | 2.50  | 0.83 | 1.00 | 0.00 | 0.00 | 3.00 | 0.00 |
| 1.00 | 2.00 | 7.40  | 0.31 | 3.00 | 5.00 | 1.00 | 3.00 | 3.00 |
| 1.00 | 1.00 | 7.60  | 0.69 | 2.00 | 6.00 | 1.00 | 3.00 | 0.00 |
| 0.00 | 2.00 | 1.80  | 0.90 | 1.00 | 0.00 | 0.00 | 3.00 | 1.00 |
| 0.00 | 1.00 | 3.80  | 0.63 | 2.00 | 3.00 | 0.00 | 3.00 | 2.00 |
| 0.00 | 1.00 | 9.00  | 1.00 | 2.00 | 5.00 | 1.00 | 3.00 | 0.00 |
| 1.00 | 2.00 | 4.50  | 1.13 | 1.00 | 0.00 | 0.00 | 3.00 | 0.00 |
| 0.00 | 2.00 | 7.80  | 0.33 | 3.00 | 5.00 | 1.00 | 3.00 | 3.00 |
| 0.00 | 2.00 | 7.40  | 0.32 | 3.00 | 4.00 | 1.00 | 3.00 | 3.00 |
| 1.00 | 2.00 | 5.50  | 0.92 | 2.00 | 3.00 | 0.00 | 2.00 | 0.00 |
| 0.00 | 2.00 | 9.70  | 0.46 | 3.00 | 2.00 | 0.00 | 3.00 | 3.00 |
| 1.00 | 1.00 | 6.30  | 0.53 | 3.00 | 4.00 | 1.00 | 2.00 | 0.00 |
| 1.00 | 2.00 | 5.10  | 0.43 | 3.00 | 7.00 | 1.00 | 3.00 | 3.00 |
| 0.00 | 1.00 | 4.90  | 0.45 | 2.00 | 7.00 | 1.00 | 3.00 | 0.00 |
| 0.00 | 1.00 | 5.30  | 0.76 | 2.00 | 3.00 | 0.00 | 3.00 | 0.00 |
| 0.00 | 1.00 | 12.40 | 0.59 | 3.00 | 0.00 | 0.00 | 3.00 | 0.00 |
| 2.00 | 3.00 | 5.70  | 0.44 | 3.00 | 4.00 | 1.00 | 3.00 | 3.00 |
| 2.00 | 1.00 | 5.50  | 0.69 | 2.00 | 5.00 | 1.00 | 3.00 | 0.00 |
| 0.00 | 1.00 | 7.70  | 0.43 | 3.00 | 3.00 | 0.00 | 2.00 | 3.00 |
| 2.00 | 3.00 | 5.30  | 0.59 | 2.00 | 6.00 | 1.00 | 3.00 | 0.00 |
| 1.00 | 3.00 | 3.20  | 0.80 | 1.00 | 0.00 | 0.00 | 2.00 | 0.00 |
| 0.00 | 2.00 | 3.80  | 1.27 | 1.00 | 0.00 | 0.00 | 3.00 | 1.00 |
| 2.00 | 3.00 | 3.80  | 1.27 | 1.00 | 0.00 | 0.00 | 3.00 | 1.00 |
| 0.00 | 1.00 | 6.80  | 0.57 | 3.00 | 2.00 | 0.00 | 2.00 | 0.00 |
| 1.00 | 2.00 | 9.60  | 0.53 | 3.00 | 4.00 | 1.00 | 3.00 | 3.00 |
| 1.00 | 3.00 | 3.00  | 0.75 | 1.00 | 0.00 | 0.00 | 2.00 | 0.00 |
| 1.00 | 3.00 | 1.80  | 0.90 | 1.00 | 0.00 | 0.00 | 3.00 | 1.00 |
| 2.00 | 3.00 | 3.70  | 0.62 | 2.00 | 0.00 | 0.00 | 2.00 | 0.00 |
| 1.00 | 1.00 | 4.30  | 1.43 | 1.00 | 0.00 | 0.00 | 3.00 | 0.00 |
| 1.00 | 1.00 | 4.00  | 0.57 | 2.00 | 4.00 | 1.00 | 2.00 | 0.00 |
| 1.00 | 3.00 | 2.90  | 0.97 | 1.00 | 0.00 | 0.00 | 3.00 | 0.00 |
| 1.00 | 1.00 | 3.70  | 1.23 | 1.00 | 0.00 | 0.00 | 3.00 | 0.00 |
| 1.00 | 1.00 | 3.20  | 0.40 | 2.00 | 3.00 | 0.00 | 3.00 | 2.00 |

|      |      |      |      |      |      |      |      |      |
|------|------|------|------|------|------|------|------|------|
| 1.00 | 1.00 | 3.50 | 0.88 | 1.00 | 0.00 | 0.00 | 2.00 | 0.00 |
| 1.00 | 3.00 | 4.30 | 1.08 | 1.00 | 0.00 | 0.00 | 2.00 | 1.00 |
| 0.00 | 3.00 | 1.40 | 0.28 | 1.00 | 0.00 | 0.00 | 2.00 | 0.00 |
| 0.00 | 3.00 | 1.30 | 0.43 | 1.00 | 0.00 | 0.00 | 2.00 | 1.00 |
| 1.00 | 1.00 | 4.50 | 0.38 | 3.00 | 4.00 | 1.00 | 3.00 | 0.00 |
| 2.00 | 3.00 | 6.00 | 0.33 | 3.00 | 3.00 | 0.00 | 3.00 | 3.00 |
| 1.00 | 2.00 | 5.50 | 0.61 | 2.00 | 1.00 | 0.00 | 3.00 | 0.00 |
| 1.00 | 2.00 | 4.60 | 0.51 | 2.00 | 1.00 | 0.00 | 3.00 | 2.00 |
| 1.00 | 1.00 | 6.20 | 1.24 | 1.00 | 0.00 | 0.00 | 3.00 | 0.00 |
| 2.00 | 3.00 | 6.40 | 0.80 | 2.00 | 3.00 | 0.00 | 2.00 | 2.00 |
| 2.00 | 3.00 | 2.10 | 1.05 | 1.00 | 0.00 | 0.00 | 3.00 | 1.00 |
| 2.00 | 3.00 | 3.70 | 1.23 | 1.00 | 0.00 | 0.00 | 3.00 | 0.00 |
| 2.00 | 1.00 | 3.30 | 1.10 | 1.00 | 0.00 | 0.00 | 3.00 | 0.00 |
| 1.00 | 1.00 | 4.20 | 0.84 | 1.00 | 0.00 | 0.00 | 3.00 | 1.00 |

| Interval3 | Interval4 | Parity2 | Birthinterv: | Birthinterv: | Agechild3 | Interaction | Interaction | Zscore |
|-----------|-----------|---------|--------------|--------------|-----------|-------------|-------------|--------|
| 3.00      | 0.00      | 2.00    | 47.00        | 4.00         | 2.00      | 94.00       | 94.00       | 16.50  |
| 2.00      | 0.00      | 1.00    | 31.00        | 3.00         | 1.00      | 31.00       | 62.00       | 0.70   |
| 1.00      | 1.00      | 1.00    | 8.00         | 1.00         | 2.00      | 16.00       | 16.00       | 15.00  |
| 1.00      | 1.00      | 2.00    | 15.00        | 1.00         | 1.00      | 15.00       | 15.00       | -1.20  |
| 4.00      | 0.00      | 2.00    | 61.00        | 5.00         | 1.00      | 61.00       | 61.00       | -11.90 |
| 3.00      | 0.00      | 1.00    | 46.00        | 4.00         | 1.00      | 46.00       | 46.00       | -1.50  |
| 1.00      | 1.00      | 1.00    | 8.00         | 1.00         | 2.00      | 16.00       | 16.00       | 7.40   |
| 1.00      | 1.00      | 1.00    | 10.00        | 1.00         | 2.00      | 20.00       | 20.00       | 2.50   |
| 4.00      | 0.00      | 1.00    | 72.00        | 5.00         | 1.00      | 72.00       | 72.00       | -6.00  |
| 1.00      | 1.00      | 1.00    | 15.00        | 1.00         | 1.00      | 15.00       | 15.00       | -3.50  |
| 1.00      | 1.00      | 2.00    | 16.00        | 1.00         | 1.00      | 16.00       | 16.00       | -10.00 |
| 3.00      | 0.00      | 1.00    | 38.00        | 4.00         | 1.00      | 38.00       | 38.00       | -3.30  |
| 1.00      | 1.00      | 1.00    | 19.00        | 2.00         | 1.00      | 19.00       | 19.00       | -7.30  |
| 1.00      | 1.00      | 1.00    | 15.00        | 1.00         | 1.00      | 15.00       | 15.00       | -3.60  |
| 4.00      | 0.00      | 1.00    | 95.00        | 5.00         | 1.00      | 95.00       | 95.00       | -16.60 |
| 1.00      | 1.00      | 1.00    | 16.00        | 1.00         | 1.00      | 16.00       | 32.00       | -7.40  |
| 3.00      | 0.00      | 1.00    | 37.00        | 4.00         | 1.00      | 37.00       | 37.00       | -6.90  |
| 1.00      | 1.00      | 2.00    | 12.00        | 1.00         | 1.00      | 12.00       | 24.00       | -8.70  |
| 1.00      | 1.00      | 2.00    | 21.00        | 2.00         | 1.00      | 21.00       | 21.00       | -12.30 |
| 4.00      | 0.00      | 2.00    | 84.00        | 5.00         | 1.00      | 84.00       | 84.00       | -10.30 |
| 4.00      | 0.00      | 1.00    | 76.00        | 5.00         | 1.00      | 76.00       | 152.00      | -5.50  |
| 1.00      | 1.00      | 1.00    | 14.00        | 1.00         | 1.00      | 14.00       | 28.00       | -5.50  |
| 4.00      | 0.00      | 2.00    | 64.00        | 5.00         | 1.00      | 64.00       | 64.00       | 1.80   |
| 1.00      | 1.00      | 1.00    | 10.00        | 1.00         | 2.00      | 20.00       | 10.00       | 12.20  |
| 3.00      | 0.00      | 2.00    | 53.00        | 4.00         | 2.00      | 106.00      | 106.00      | 3.50   |
| 4.00      | 0.00      | 2.00    | 80.00        | 5.00         | 1.00      | 80.00       | 160.00      | -9.30  |
| 3.00      | 0.00      | 2.00    | 44.00        | 4.00         | 1.00      | 44.00       | 88.00       | -6.20  |
| 1.00      | 1.00      | 1.00    | 15.00        | 1.00         | 1.00      | 15.00       | 15.00       | 4.90   |
| 4.00      | 0.00      | 2.00    | 83.00        | 5.00         | 2.00      | 166.00      | 83.00       | 8.40   |
| 1.00      | 1.00      | 2.00    | 12.00        | 1.00         | 1.00      | 12.00       | 24.00       | 0.20   |
| 1.00      | 1.00      | 1.00    | 13.00        | 1.00         | 1.00      | 13.00       | 13.00       | -2.10  |
| 1.00      | 1.00      | 1.00    | 17.00        | 1.00         | 1.00      | 17.00       | 17.00       | -3.60  |
| 4.00      | 0.00      | 1.00    | 61.00        | 5.00         | 1.00      | 61.00       | 61.00       | 3.30   |
| 2.00      | 0.00      | 2.00    | 28.00        | 3.00         | 1.00      | 28.00       | 28.00       | -6.10  |
| 1.00      | 1.00      | 2.00    | 12.00        | 1.00         | 1.00      | 12.00       | 24.00       | -3.20  |
| 1.00      | 1.00      | 1.00    | 13.00        | 1.00         | 1.00      | 13.00       | 13.00       | -1.10  |
| 2.00      | 0.00      | 1.00    | 25.00        | 3.00         | 2.00      | 50.00       | 25.00       | 6.50   |
| 1.00      | 1.00      | 1.00    | 21.00        | 2.00         | 2.00      | 42.00       | 42.00       | 6.50   |
| 1.00      | 1.00      | 1.00    | 10.00        | 1.00         | 1.00      | 10.00       | 10.00       | 1.50   |
| 1.00      | 1.00      | 2.00    | 13.00        | 1.00         | 1.00      | 13.00       | 13.00       | 4.50   |
| 3.00      | 0.00      | 2.00    | 47.00        | 4.00         | 2.00      | 94.00       | 47.00       | 15.50  |
| 1.00      | 1.00      | 2.00    | 7.00         | 1.00         | 2.00      | 14.00       | 7.00        | 2.70   |
| 2.00      | 0.00      | 2.00    | 30.00        | 3.00         | 2.00      | 60.00       | 30.00       | 3.50   |
| 3.00      | 0.00      | 2.00    | 49.00        | 4.00         | 2.00      | 98.00       | 98.00       | 4.40   |
| 3.00      | 0.00      | 2.00    | 40.00        | 4.00         | 2.00      | 80.00       | 40.00       | 12.80  |
| 2.00      | 0.00      | 2.00    | 35.00        | 3.00         | 2.00      | 70.00       | 35.00       | 12.80  |

|      |      |      |       |      |      |        |        |        |
|------|------|------|-------|------|------|--------|--------|--------|
| 1.00 | 1.00 | 2.00 | 21.00 | 2.00 | 2.00 | 42.00  | 21.00  | 4.10   |
| 1.00 | 1.00 | 1.00 | 15.00 | 1.00 | 1.00 | 15.00  | 15.00  | -3.30  |
| 3.00 | 0.00 | 1.00 | 51.00 | 4.00 | 1.00 | 51.00  | 51.00  | -2.20  |
| 4.00 | 0.00 | 1.00 | 66.00 | 5.00 | 1.00 | 66.00  | 132.00 | -2.20  |
| 1.00 | 1.00 | 1.00 | 15.00 | 1.00 | 1.00 | 15.00  | 30.00  | -5.10  |
| 4.00 | 0.00 | 1.00 | 60.00 | 5.00 | 1.00 | 60.00  | 120.00 | -5.80  |
| 1.00 | 1.00 | 2.00 | 12.00 | 1.00 | 1.00 | 12.00  | 24.00  | -4.00  |
| 1.00 | 1.00 | 1.00 | 12.00 | 1.00 | 2.00 | 24.00  | 12.00  | 9.50   |
| 3.00 | 0.00 | 2.00 | 48.00 | 4.00 | 2.00 | 96.00  | 48.00  | 14.50  |
| 1.00 | 1.00 | 2.00 | 19.00 | 2.00 | 1.00 | 19.00  | 38.00  | -2.50  |
| 1.00 | 1.00 | 1.00 | 13.00 | 1.00 | 1.00 | 13.00  | 13.00  | -2.50  |
| 1.00 | 1.00 | 1.00 | 10.00 | 1.00 | 2.00 | 20.00  | 10.00  | -0.60  |
| 3.00 | 0.00 | 2.00 | 46.00 | 4.00 | 1.00 | 46.00  | 46.00  | -11.50 |
| 2.00 | 0.00 | 1.00 | 29.00 | 3.00 | 2.00 | 58.00  | 58.00  | 7.50   |
| 1.00 | 1.00 | 1.00 | 15.00 | 1.00 | 1.00 | 15.00  | 30.00  | -6.50  |
| 2.00 | 0.00 | 2.00 | 29.00 | 3.00 | 2.00 | 58.00  | 29.00  | 4.50   |
| 1.00 | 1.00 | 1.00 | 18.00 | 2.00 | 1.00 | 18.00  | 36.00  | -11.90 |
| 1.00 | 1.00 | 2.00 | 23.00 | 2.00 | 2.00 | 46.00  | 46.00  | -3.50  |
| 3.00 | 0.00 | 2.00 | 45.00 | 4.00 | 2.00 | 90.00  | 90.00  | 11.80  |
| 1.00 | 1.00 | 2.00 | 16.00 | 1.00 | 1.00 | 16.00  | 16.00  | -1.30  |
| 2.00 | 0.00 | 2.00 | 30.00 | 3.00 | 1.00 | 30.00  | 30.00  | -3.50  |
| 2.00 | 0.00 | 2.00 | 30.00 | 3.00 | 2.00 | 60.00  | 30.00  | 16.10  |
| 1.00 | 1.00 | 1.00 | 13.00 | 1.00 | 1.00 | 13.00  | 26.00  | 11.10  |
| 2.00 | 0.00 | 2.00 | 35.00 | 3.00 | 1.00 | 35.00  | 35.00  | -0.60  |
| 1.00 | 1.00 | 2.00 | 8.00  | 1.00 | 2.00 | 16.00  | 8.00   | 9.80   |
| 1.00 | 1.00 | 2.00 | 16.00 | 1.00 | 1.00 | 16.00  | 16.00  | -3.50  |
| 2.00 | 0.00 | 2.00 | 27.00 | 3.00 | 1.00 | 27.00  | 27.00  | -1.60  |
| 1.00 | 1.00 | 2.00 | 20.00 | 2.00 | 1.00 | 20.00  | 40.00  | 2.80   |
| 1.00 | 1.00 | 1.00 | 20.00 | 2.00 | 1.00 | 20.00  | 40.00  | -5.50  |
| 2.00 | 0.00 | 2.00 | 33.00 | 3.00 | 2.00 | 66.00  | 66.00  | 9.50   |
| 1.00 | 1.00 | 1.00 | 15.00 | 1.00 | 1.00 | 15.00  | 30.00  | 4.50   |
| 1.00 | 1.00 | 2.00 | 18.00 | 2.00 | 2.00 | 36.00  | 36.00  | 5.50   |
| 1.00 | 1.00 | 2.00 | 18.00 | 2.00 | 1.00 | 18.00  | 18.00  | -4.30  |
| 3.00 | 0.00 | 2.00 | 57.00 | 4.00 | 1.00 | 57.00  | 114.00 | 2.50   |
| 3.00 | 0.00 | 2.00 | 55.00 | 4.00 | 2.00 | 110.00 | 110.00 | 6.50   |
| 1.00 | 1.00 | 2.00 | 9.00  | 1.00 | 1.00 | 9.00   | 9.00   | 1.50   |
| 1.00 | 1.00 | 2.00 | 10.00 | 1.00 | 1.00 | 10.00  | 10.00  | 3.50   |
| 3.00 | 0.00 | 2.00 | 46.00 | 4.00 | 2.00 | 92.00  | 46.00  | -2.50  |
| 1.00 | 1.00 | 2.00 | 16.00 | 1.00 | 1.00 | 16.00  | 32.00  | -0.80  |
| 2.00 | 0.00 | 1.00 | 25.00 | 3.00 | 2.00 | 50.00  | 25.00  | 6.50   |
| 3.00 | 0.00 | 2.00 | 36.00 | 4.00 | 2.00 | 72.00  | 72.00  | -1.50  |
| 1.00 | 1.00 | 1.00 | 10.00 | 1.00 | 2.00 | 20.00  | 20.00  | -1.40  |
| 2.00 | 0.00 | 2.00 | 33.00 | 3.00 | 1.00 | 33.00  | 33.00  | -4.30  |
| 1.00 | 1.00 | 1.00 | 10.00 | 1.00 | 2.00 | 20.00  | 20.00  | 8.60   |
| 4.00 | 0.00 | 2.00 | 61.00 | 5.00 | 1.00 | 61.00  | 122.00 | 0.60   |
| 1.00 | 1.00 | 1.00 | 21.00 | 2.00 | 1.00 | 21.00  | 21.00  | -7.90  |
| 1.00 | 1.00 | 2.00 | 18.00 | 2.00 | 1.00 | 18.00  | 18.00  | -1.30  |

|      |      |      |       |      |      |        |       |        |
|------|------|------|-------|------|------|--------|-------|--------|
| 2.00 | 0.00 | 2.00 | 34.00 | 3.00 | 2.00 | 68.00  | 34.00 | 9.80   |
| 1.00 | 1.00 | 1.00 | 14.00 | 1.00 | 1.00 | 14.00  | 28.00 | 2.70   |
| 3.00 | 0.00 | 1.00 | 43.00 | 4.00 | 1.00 | 43.00  | 43.00 | -2.50  |
| 1.00 | 1.00 | 2.00 | 16.00 | 1.00 | 1.00 | 16.00  | 16.00 | -5.90  |
| 2.00 | 0.00 | 2.00 | 31.00 | 3.00 | 2.00 | 62.00  | 31.00 | -1.90  |
| 1.00 | 1.00 | 2.00 | 17.00 | 1.00 | 1.00 | 17.00  | 34.00 | -7.40  |
| 3.00 | 0.00 | 2.00 | 48.00 | 4.00 | 2.00 | 96.00  | 96.00 | 1.50   |
| 1.00 | 1.00 | 1.00 | 15.00 | 1.00 | 1.00 | 15.00  | 15.00 | 1.00   |
| 3.00 | 0.00 | 2.00 | 57.00 | 4.00 | 1.00 | 57.00  | 57.00 | -5.30  |
| 1.00 | 1.00 | 2.00 | 11.00 | 1.00 | 2.00 | 22.00  | 22.00 | 7.40   |
| 3.00 | 0.00 | 1.00 | 39.00 | 4.00 | 1.00 | 39.00  | 39.00 | -0.20  |
| 1.00 | 1.00 | 2.00 | 17.00 | 1.00 | 1.00 | 17.00  | 17.00 | -0.30  |
| 3.00 | 0.00 | 1.00 | 53.00 | 4.00 | 2.00 | 106.00 | 53.00 | 14.00  |
| 3.00 | 0.00 | 2.00 | 38.00 | 4.00 | 1.00 | 38.00  | 76.00 | 1.50   |
| 3.00 | 0.00 | 1.00 | 48.00 | 4.00 | 2.00 | 96.00  | 96.00 | 18.80  |
| 1.00 | 1.00 | 2.00 | 15.00 | 1.00 | 1.00 | 15.00  | 30.00 | -5.20  |
| 1.00 | 1.00 | 2.00 | 20.00 | 2.00 | 1.00 | 20.00  | 40.00 | -11.50 |
| 1.00 | 1.00 | 2.00 | 18.00 | 2.00 | 1.00 | 18.00  | 36.00 | -3.50  |
| 3.00 | 0.00 | 2.00 | 44.00 | 4.00 | 2.00 | 88.00  | 44.00 | 9.70   |
| 1.00 | 1.00 | 2.00 | 15.00 | 1.00 | 1.00 | 15.00  | 30.00 | -15.60 |
| 1.00 | 1.00 | 2.00 | 18.00 | 2.00 | 2.00 | 36.00  | 18.00 | 5.30   |
| 3.00 | 0.00 | 1.00 | 38.00 | 4.00 | 2.00 | 76.00  | 76.00 | -1.20  |
| 1.00 | 1.00 | 2.00 | 19.00 | 2.00 | 1.00 | 19.00  | 19.00 | -8.10  |
| 3.00 | 0.00 | 2.00 | 36.00 | 4.00 | 2.00 | 72.00  | 72.00 | 17.00  |
| 3.00 | 0.00 | 2.00 | 42.00 | 4.00 | 2.00 | 84.00  | 84.00 | 13.60  |
| 1.00 | 1.00 | 1.00 | 19.00 | 2.00 | 1.00 | 19.00  | 38.00 | -6.10  |
| 2.00 | 0.00 | 1.00 | 29.00 | 3.00 | 1.00 | 29.00  | 58.00 | -5.40  |
| 2.00 | 0.00 | 2.00 | 25.00 | 3.00 | 1.00 | 25.00  | 50.00 | 6.10   |
| 1.00 | 1.00 | 1.00 | 18.00 | 2.00 | 1.00 | 18.00  | 18.00 | -10.70 |
| 3.00 | 0.00 | 2.00 | 41.00 | 4.00 | 2.00 | 82.00  | 41.00 | 2.70   |
| 1.00 | 1.00 | 2.00 | 16.00 | 1.00 | 1.00 | 16.00  | 32.00 | -1.50  |
| 1.00 | 1.00 | 1.00 | 20.00 | 2.00 | 1.00 | 20.00  | 40.00 | -10.30 |
| 3.00 | 0.00 | 2.00 | 38.00 | 4.00 | 1.00 | 38.00  | 76.00 | -12.30 |
| 1.00 | 1.00 | 2.00 | 19.00 | 2.00 | 1.00 | 19.00  | 19.00 | 1.50   |
| 4.00 | 0.00 | 1.00 | 68.00 | 5.00 | 2.00 | 136.00 | 68.00 | 4.60   |
| 1.00 | 1.00 | 1.00 | 15.00 | 1.00 | 1.00 | 15.00  | 15.00 | -2.90  |
| 1.00 | 1.00 | 1.00 | 21.00 | 2.00 | 1.00 | 21.00  | 21.00 | -10.00 |
| 3.00 | 0.00 | 2.00 | 40.00 | 4.00 | 2.00 | 80.00  | 40.00 | 8.50   |
| 1.00 | 1.00 | 2.00 | 13.00 | 1.00 | 1.00 | 13.00  | 26.00 | -1.90  |
| 2.00 | 0.00 | 1.00 | 32.00 | 3.00 | 2.00 | 64.00  | 64.00 | 6.50   |
| 1.00 | 1.00 | 2.00 | 16.00 | 1.00 | 1.00 | 16.00  | 16.00 | 0.50   |
| 3.00 | 0.00 | 2.00 | 38.00 | 4.00 | 1.00 | 38.00  | 76.00 | 3.80   |
| 1.00 | 1.00 | 2.00 | 21.00 | 2.00 | 1.00 | 21.00  | 21.00 | -12.70 |
| 1.00 | 1.00 | 2.00 | 12.00 | 1.00 | 1.00 | 12.00  | 24.00 | 0.60   |
| 2.00 | 0.00 | 1.00 | 32.00 | 3.00 | 1.00 | 32.00  | 64.00 | -1.10  |
| 1.00 | 1.00 | 2.00 | 15.00 | 1.00 | 1.00 | 15.00  | 30.00 | -6.50  |
| 1.00 | 1.00 | 2.00 | 12.00 | 1.00 | 1.00 | 12.00  | 12.00 | -6.00  |

|      |      |      |       |      |      |        |        |        |
|------|------|------|-------|------|------|--------|--------|--------|
| 4.00 | 0.00 | 2.00 | 61.00 | 5.00 | 2.00 | 122.00 | 122.00 | 4.50   |
| 1.00 | 1.00 | 1.00 | 15.00 | 1.00 | 1.00 | 15.00  | 15.00  | 0.70   |
| 2.00 | 0.00 | 2.00 | 26.00 | 3.00 | 2.00 | 52.00  | 26.00  | 11.50  |
| 2.00 | 0.00 | 1.00 | 32.00 | 3.00 | 1.00 | 32.00  | 64.00  | -6.50  |
| 3.00 | 0.00 | 2.00 | 46.00 | 4.00 | 1.00 | 46.00  | 46.00  | -15.50 |
| 1.00 | 1.00 | 1.00 | 15.00 | 1.00 | 1.00 | 15.00  | 15.00  | 7.50   |
| 1.00 | 1.00 | 2.00 | 19.00 | 2.00 | 1.00 | 19.00  | 19.00  | -3.50  |
| 3.00 | 0.00 | 1.00 | 41.00 | 4.00 | 1.00 | 41.00  | 41.00  | -1.00  |
| 1.00 | 1.00 | 1.00 | 15.00 | 1.00 | 1.00 | 15.00  | 15.00  | -2.70  |
| 1.00 | 1.00 | 1.00 | 21.00 | 2.00 | 2.00 | 42.00  | 21.00  | 3.90   |
| 1.00 | 1.00 | 2.00 | 19.00 | 2.00 | 1.00 | 19.00  | 19.00  | 3.50   |
| 3.00 | 0.00 | 2.00 | 46.00 | 4.00 | 1.00 | 46.00  | 92.00  | -16.50 |
| 2.00 | 0.00 | 2.00 | 29.00 | 3.00 | 2.00 | 58.00  | 29.00  | 15.90  |
| 1.00 | 1.00 | 2.00 | 14.00 | 1.00 | 1.00 | 14.00  | 14.00  | 7.50   |
| 3.00 | 0.00 | 2.00 | 49.00 | 4.00 | 2.00 | 98.00  | 98.00  | 5.50   |
| 1.00 | 1.00 | 1.00 | 14.00 | 1.00 | 1.00 | 14.00  | 28.00  | -3.50  |
| 1.00 | 1.00 | 2.00 | 12.00 | 1.00 | 2.00 | 24.00  | 24.00  | 9.50   |
| 1.00 | 1.00 | 2.00 | 13.00 | 1.00 | 1.00 | 13.00  | 13.00  | 3.50   |
| 4.00 | 0.00 | 1.00 | 79.00 | 5.00 | 2.00 | 158.00 | 79.00  | 5.50   |
| 1.00 | 1.00 | 2.00 | 16.00 | 1.00 | 1.00 | 16.00  | 16.00  | 2.50   |
| 2.00 | 0.00 | 1.00 | 32.00 | 3.00 | 2.00 | 64.00  | 64.00  | 8.50   |
| 1.00 | 1.00 | 2.00 | 15.00 | 1.00 | 1.00 | 15.00  | 30.00  | -13.80 |
| 1.00 | 1.00 | 2.00 | 16.00 | 1.00 | 1.00 | 16.00  | 32.00  | -2.50  |
| 3.00 | 0.00 | 1.00 | 37.00 | 4.00 | 2.00 | 74.00  | 37.00  | 9.00   |
| 3.00 | 0.00 | 2.00 | 48.00 | 4.00 | 2.00 | 96.00  | 48.00  | 13.50  |
| 1.00 | 1.00 | 1.00 | 15.00 | 1.00 | 1.00 | 15.00  | 15.00  | -2.50  |
| 4.00 | 0.00 | 2.00 | 70.00 | 5.00 | 1.00 | 70.00  | 70.00  | 8.00   |
| 1.00 | 1.00 | 1.00 | 15.00 | 1.00 | 1.00 | 15.00  | 15.00  | -11.50 |
| 3.00 | 0.00 | 1.00 | 45.00 | 4.00 | 1.00 | 45.00  | 90.00  | -2.50  |
| 1.00 | 1.00 | 2.00 | 13.00 | 1.00 | 1.00 | 13.00  | 26.00  | -1.80  |
| 2.00 | 0.00 | 2.00 | 35.00 | 3.00 | 2.00 | 70.00  | 35.00  | 6.70   |
| 1.00 | 1.00 | 1.00 | 20.00 | 2.00 | 1.00 | 20.00  | 40.00  | -6.50  |
| 3.00 | 0.00 | 2.00 | 36.00 | 4.00 | 2.00 | 72.00  | 72.00  | 2.70   |
| 3.00 | 0.00 | 1.00 | 54.00 | 4.00 | 2.00 | 108.00 | 108.00 | 10.30  |
| 1.00 | 1.00 | 1.00 | 16.00 | 1.00 | 1.00 | 16.00  | 16.00  | 5.00   |
| 1.00 | 1.00 | 1.00 | 19.00 | 2.00 | 1.00 | 19.00  | 19.00  | -14.30 |
| 1.00 | 1.00 | 2.00 | 15.00 | 1.00 | 1.00 | 15.00  | 30.00  | -3.00  |
| 1.00 | 1.00 | 2.00 | 19.00 | 2.00 | 2.00 | 38.00  | 19.00  | 7.80   |
| 1.00 | 1.00 | 1.00 | 15.00 | 1.00 | 1.00 | 15.00  | 30.00  | -4.20  |
| 3.00 | 0.00 | 2.00 | 36.00 | 4.00 | 1.00 | 36.00  | 72.00  | 0.80   |
| 1.00 | 1.00 | 2.00 | 17.00 | 1.00 | 1.00 | 17.00  | 17.00  | -8.30  |
| 2.00 | 0.00 | 1.00 | 27.00 | 3.00 | 2.00 | 54.00  | 27.00  | 5.70   |
| 1.00 | 1.00 | 2.00 | 13.00 | 1.00 | 1.00 | 13.00  | 13.00  | 7.00   |
| 1.00 | 1.00 | 2.00 | 18.00 | 2.00 | 1.00 | 18.00  | 18.00  | -7.20  |
| 4.00 | 0.00 | 2.00 | 61.00 | 5.00 | 2.00 | 122.00 | 61.00  | 12.00  |
| 2.00 | 0.00 | 1.00 | 29.00 | 3.00 | 1.00 | 29.00  | 29.00  | 9.00   |
| 1.00 | 1.00 | 2.00 | 17.00 | 1.00 | 1.00 | 17.00  | 34.00  | -11.40 |



|      |      |      |       |      |      |        |        |        |
|------|------|------|-------|------|------|--------|--------|--------|
| 2.00 | 0.00 | 1.00 | 25.00 | 3.00 | 2.00 | 50.00  | 50.00  | 4.10   |
| 1.00 | 1.00 | 2.00 | 16.00 | 1.00 | 1.00 | 16.00  | 16.00  | -4.90  |
| 1.00 | 1.00 | 1.00 | 11.00 | 1.00 | 1.00 | 11.00  | 11.00  | 5.30   |
| 1.00 | 1.00 | 2.00 | 15.00 | 1.00 | 1.00 | 15.00  | 30.00  | -0.30  |
| 3.00 | 0.00 | 2.00 | 46.00 | 4.00 | 1.00 | 46.00  | 46.00  | -0.50  |
| 1.00 | 1.00 | 1.00 | 23.00 | 2.00 | 1.00 | 23.00  | 46.00  | -2.40  |
| 1.00 | 1.00 | 2.00 | 10.00 | 1.00 | 1.00 | 10.00  | 20.00  | 2.90   |
| 3.00 | 0.00 | 1.00 | 40.00 | 4.00 | 1.00 | 40.00  | 40.00  | 1.30   |
| 3.00 | 0.00 | 2.00 | 46.00 | 4.00 | 1.00 | 46.00  | 46.00  | -4.60  |
| 1.00 | 1.00 | 2.00 | 14.00 | 1.00 | 1.00 | 14.00  | 28.00  | -1.10  |
| 3.00 | 0.00 | 1.00 | 54.00 | 4.00 | 2.00 | 108.00 | 108.00 | -1.50  |
| 1.00 | 1.00 | 1.00 | 13.00 | 1.00 | 1.00 | 13.00  | 26.00  | -3.70  |
| 3.00 | 0.00 | 2.00 | 41.00 | 4.00 | 2.00 | 82.00  | 41.00  | 0.60   |
| 1.00 | 1.00 | 1.00 | 12.00 | 1.00 | 1.00 | 12.00  | 24.00  | 8.30   |
| 2.00 | 0.00 | 2.00 | 28.00 | 3.00 | 1.00 | 28.00  | 56.00  | -4.50  |
| 3.00 | 0.00 | 2.00 | 41.00 | 4.00 | 1.00 | 41.00  | 41.00  | 5.30   |
| 1.00 | 1.00 | 2.00 | 17.00 | 1.00 | 1.00 | 17.00  | 34.00  | -3.50  |
| 3.00 | 0.00 | 2.00 | 36.00 | 4.00 | 1.00 | 36.00  | 36.00  | -11.50 |
| 1.00 | 1.00 | 1.00 | 17.00 | 1.00 | 1.00 | 17.00  | 17.00  | -4.00  |
| 2.00 | 0.00 | 2.00 | 35.00 | 3.00 | 2.00 | 70.00  | 70.00  | 17.60  |
| 3.00 | 0.00 | 2.00 | 59.00 | 4.00 | 2.00 | 118.00 | 59.00  | 9.10   |
| 1.00 | 1.00 | 2.00 | 17.00 | 1.00 | 1.00 | 17.00  | 17.00  | 5.10   |
| 3.00 | 0.00 | 1.00 | 48.00 | 4.00 | 2.00 | 96.00  | 96.00  | 16.80  |
| 1.00 | 1.00 | 2.00 | 20.00 | 2.00 | 1.00 | 20.00  | 20.00  | -11.50 |
| 2.00 | 0.00 | 1.00 | 28.00 | 3.00 | 1.00 | 28.00  | 28.00  | 2.30   |
| 1.00 | 1.00 | 1.00 | 13.00 | 1.00 | 1.00 | 13.00  | 26.00  | -3.40  |
| 1.00 | 1.00 | 1.00 | 19.00 | 2.00 | 1.00 | 19.00  | 38.00  | -8.50  |
| 3.00 | 0.00 | 2.00 | 38.00 | 4.00 | 1.00 | 38.00  | 38.00  | -9.50  |
| 1.00 | 1.00 | 2.00 | 11.00 | 1.00 | 1.00 | 11.00  | 22.00  | -4.40  |
| 4.00 | 0.00 | 2.00 | 60.00 | 5.00 | 2.00 | 120.00 | 60.00  | 9.00   |
| 1.00 | 1.00 | 1.00 | 13.00 | 1.00 | 1.00 | 13.00  | 26.00  | 1.20   |
| 3.00 | 0.00 | 2.00 | 52.00 | 4.00 | 1.00 | 52.00  | 104.00 | -11.10 |
| 1.00 | 1.00 | 2.00 | 15.00 | 1.00 | 1.00 | 15.00  | 15.00  | -6.50  |
| 1.00 | 1.00 | 2.00 | 15.00 | 1.00 | 1.00 | 15.00  | 30.00  | -6.50  |
| 4.00 | 0.00 | 2.00 | 64.00 | 5.00 | 2.00 | 128.00 | 64.00  | 10.80  |
| 1.00 | 1.00 | 2.00 | 19.00 | 2.00 | 1.00 | 19.00  | 38.00  | -4.40  |
| 4.00 | 0.00 | 1.00 | 68.00 | 5.00 | 1.00 | 68.00  | 68.00  | -11.30 |
| 4.00 | 0.00 | 1.00 | 92.00 | 5.00 | 1.00 | 92.00  | 184.00 | 1.50   |
| 1.00 | 1.00 | 1.00 | 18.00 | 2.00 | 1.00 | 18.00  | 36.00  | -1.50  |
| 1.00 | 1.00 | 2.00 | 10.00 | 1.00 | 2.00 | 20.00  | 10.00  | 5.70   |
| 3.00 | 0.00 | 1.00 | 39.00 | 4.00 | 2.00 | 78.00  | 39.00  | 7.00   |
| 1.00 | 1.00 | 1.00 | 14.00 | 1.00 | 1.00 | 14.00  | 14.00  | -9.00  |
| 1.00 | 1.00 | 1.00 | 13.00 | 1.00 | 1.00 | 13.00  | 13.00  | 1.10   |
| 2.00 | 0.00 | 1.00 | 35.00 | 3.00 | 2.00 | 70.00  | 35.00  | 15.50  |
| 1.00 | 1.00 | 1.00 | 11.00 | 1.00 | 2.00 | 22.00  | 22.00  | -0.50  |
| 3.00 | 0.00 | 1.00 | 48.00 | 4.00 | 1.00 | 48.00  | 96.00  | -2.50  |
| 3.00 | 0.00 | 1.00 | 54.00 | 4.00 | 1.00 | 54.00  | 54.00  | -5.60  |

|      |      |      |       |      |      |        |        |        |
|------|------|------|-------|------|------|--------|--------|--------|
| 1.00 | 1.00 | 1.00 | 19.00 | 2.00 | 1.00 | 19.00  | 38.00  | -7.70  |
| 1.00 | 1.00 | 1.00 | 18.00 | 2.00 | 1.00 | 18.00  | 18.00  | -4.70  |
| 1.00 | 1.00 | 2.00 | 13.00 | 1.00 | 1.00 | 13.00  | 26.00  | -4.30  |
| 4.00 | 0.00 | 2.00 | 76.00 | 5.00 | 2.00 | 152.00 | 76.00  | 9.00   |
| 1.00 | 1.00 | 2.00 | 16.00 | 1.00 | 1.00 | 16.00  | 32.00  | -6.50  |
| 3.00 | 0.00 | 1.00 | 38.00 | 4.00 | 1.00 | 38.00  | 76.00  | -7.70  |
| 3.00 | 0.00 | 1.00 | 41.00 | 4.00 | 1.00 | 41.00  | 82.00  | 1.70   |
| 1.00 | 1.00 | 1.00 | 13.00 | 1.00 | 1.00 | 13.00  | 13.00  | 2.10   |
| 3.00 | 0.00 | 2.00 | 36.00 | 4.00 | 2.00 | 72.00  | 72.00  | 1.20   |
| 1.00 | 1.00 | 2.00 | 11.00 | 1.00 | 2.00 | 22.00  | 22.00  | 6.10   |
| 4.00 | 0.00 | 2.00 | 69.00 | 5.00 | 2.00 | 138.00 | 69.00  | 6.00   |
| 1.00 | 1.00 | 1.00 | 13.00 | 1.00 | 1.00 | 13.00  | 26.00  | 1.50   |
| 3.00 | 0.00 | 1.00 | 51.00 | 4.00 | 1.00 | 51.00  | 102.00 | -9.50  |
| 1.00 | 1.00 | 1.00 | 15.00 | 1.00 | 1.00 | 15.00  | 15.00  | 5.90   |
| 1.00 | 1.00 | 2.00 | 10.00 | 1.00 | 2.00 | 20.00  | 10.00  | 7.10   |
| 3.00 | 0.00 | 2.00 | 46.00 | 4.00 | 1.00 | 46.00  | 46.00  | -7.50  |
| 1.00 | 1.00 | 1.00 | 15.00 | 1.00 | 1.00 | 15.00  | 30.00  | 0.50   |
| 3.00 | 0.00 | 2.00 | 51.00 | 4.00 | 2.00 | 102.00 | 51.00  | 10.40  |
| 1.00 | 1.00 | 2.00 | 12.00 | 1.00 | 1.00 | 12.00  | 24.00  | 2.10   |
| 2.00 | 0.00 | 2.00 | 35.00 | 3.00 | 2.00 | 70.00  | 70.00  | 8.00   |
| 1.00 | 1.00 | 2.00 | 18.00 | 2.00 | 1.00 | 18.00  | 36.00  | -1.50  |
| 1.00 | 1.00 | 2.00 | 16.00 | 1.00 | 1.00 | 16.00  | 32.00  | -3.20  |
| 1.00 | 1.00 | 1.00 | 21.00 | 2.00 | 2.00 | 42.00  | 21.00  | 6.90   |
| 3.00 | 0.00 | 2.00 | 52.00 | 4.00 | 1.00 | 52.00  | 52.00  | -3.70  |
| 1.00 | 1.00 | 1.00 | 14.00 | 1.00 | 1.00 | 14.00  | 28.00  | 0.10   |
| 1.00 | 1.00 | 2.00 | 13.00 | 1.00 | 1.00 | 13.00  | 26.00  | -0.40  |
| 2.00 | 0.00 | 1.00 | 28.00 | 3.00 | 1.00 | 28.00  | 28.00  | -0.80  |
| 1.00 | 1.00 | 2.00 | 11.00 | 1.00 | 1.00 | 11.00  | 11.00  | -2.30  |
| 4.00 | 0.00 | 2.00 | 75.00 | 5.00 | 1.00 | 75.00  | 75.00  | -10.00 |
| 1.00 | 1.00 | 2.00 | 17.00 | 1.00 | 1.00 | 17.00  | 34.00  | -3.30  |
| 2.00 | 0.00 | 2.00 | 30.00 | 3.00 | 2.00 | 60.00  | 30.00  | 16.10  |
| 1.00 | 1.00 | 1.00 | 9.00  | 1.00 | 2.00 | 18.00  | 18.00  | -1.40  |
| 3.00 | 0.00 | 2.00 | 44.00 | 4.00 | 1.00 | 44.00  | 44.00  | -10.50 |
| 2.00 | 0.00 | 1.00 | 34.00 | 3.00 | 2.00 | 68.00  | 68.00  | 5.70   |
| 1.00 | 1.00 | 1.00 | 17.00 | 1.00 | 1.00 | 17.00  | 34.00  | 5.40   |
| 1.00 | 1.00 | 2.00 | 18.00 | 2.00 | 1.00 | 18.00  | 18.00  | 1.20   |
| 3.00 | 0.00 | 2.00 | 41.00 | 4.00 | 2.00 | 82.00  | 82.00  | 12.20  |
| 1.00 | 1.00 | 2.00 | 14.00 | 1.00 | 1.00 | 14.00  | 14.00  | -1.40  |
| 1.00 | 1.00 | 1.00 | 21.00 | 2.00 | 1.00 | 21.00  | 42.00  | -6.50  |
| 3.00 | 0.00 | 2.00 | 48.00 | 4.00 | 2.00 | 96.00  | 48.00  | 13.80  |
| 2.00 | 0.00 | 2.00 | 24.00 | 3.00 | 2.00 | 48.00  | 48.00  | 14.50  |
| 1.00 | 1.00 | 1.00 | 17.00 | 1.00 | 1.00 | 17.00  | 17.00  | -5.40  |
| 3.00 | 0.00 | 2.00 | 39.00 | 4.00 | 1.00 | 39.00  | 78.00  | -3.30  |
| 4.00 | 0.00 | 2.00 | 66.00 | 5.00 | 1.00 | 66.00  | 66.00  | -3.10  |
| 1.00 | 1.00 | 1.00 | 15.00 | 1.00 | 1.00 | 15.00  | 30.00  | -1.50  |
| 3.00 | 0.00 | 2.00 | 36.00 | 4.00 | 2.00 | 72.00  | 36.00  | 9.80   |
| 2.00 | 0.00 | 1.00 | 24.00 | 3.00 | 2.00 | 48.00  | 48.00  | 9.20   |

|      |      |      |       |      |      |        |        |        |
|------|------|------|-------|------|------|--------|--------|--------|
| 1.00 | 1.00 | 1.00 | 18.00 | 2.00 | 1.00 | 18.00  | 36.00  | -9.30  |
| 4.00 | 0.00 | 2.00 | 72.00 | 5.00 | 1.00 | 72.00  | 72.00  | -4.50  |
| 1.00 | 1.00 | 2.00 | 20.00 | 2.00 | 1.00 | 20.00  | 20.00  | -12.00 |
| 2.00 | 0.00 | 1.00 | 26.00 | 3.00 | 1.00 | 26.00  | 52.00  | -5.10  |
| 3.00 | 0.00 | 1.00 | 38.00 | 4.00 | 2.00 | 76.00  | 38.00  | 12.20  |
| 1.00 | 1.00 | 1.00 | 14.00 | 1.00 | 1.00 | 14.00  | 28.00  | 3.00   |
| 1.00 | 1.00 | 2.00 | 17.00 | 1.00 | 1.00 | 17.00  | 17.00  | 1.50   |
| 3.00 | 0.00 | 1.00 | 43.00 | 4.00 | 1.00 | 43.00  | 43.00  | -6.50  |
| 1.00 | 1.00 | 1.00 | 12.00 | 1.00 | 2.00 | 24.00  | 24.00  | 2.50   |
| 3.00 | 0.00 | 1.00 | 41.00 | 4.00 | 1.00 | 41.00  | 41.00  | -15.50 |
| 1.00 | 1.00 | 1.00 | 13.00 | 1.00 | 1.00 | 13.00  | 26.00  | -1.50  |
| 3.00 | 0.00 | 1.00 | 53.00 | 4.00 | 2.00 | 106.00 | 106.00 | 8.20   |
| 1.00 | 1.00 | 1.00 | 16.00 | 1.00 | 1.00 | 16.00  | 32.00  | 0.50   |
| 2.00 | 0.00 | 1.00 | 33.00 | 3.00 | 2.00 | 66.00  | 66.00  | 12.50  |
| 1.00 | 1.00 | 2.00 | 12.00 | 1.00 | 2.00 | 24.00  | 12.00  | -1.50  |
| 4.00 | 0.00 | 2.00 | 76.00 | 5.00 | 2.00 | 152.00 | 76.00  | 17.50  |
| 4.00 | 0.00 | 2.00 | 65.00 | 5.00 | 1.00 | 65.00  | 65.00  | 2.50   |
| 1.00 | 1.00 | 1.00 | 21.00 | 2.00 | 1.00 | 21.00  | 42.00  | -7.50  |
| 3.00 | 0.00 | 2.00 | 44.00 | 4.00 | 1.00 | 44.00  | 44.00  | -12.10 |
| 3.00 | 0.00 | 1.00 | 38.00 | 4.00 | 1.00 | 38.00  | 76.00  | -1.50  |
| 1.00 | 1.00 | 1.00 | 9.00  | 1.00 | 1.00 | 9.00   | 9.00   | 5.00   |
| 4.00 | 0.00 | 2.00 | 86.00 | 5.00 | 2.00 | 172.00 | 86.00  | 5.50   |
| 2.00 | 0.00 | 1.00 | 29.00 | 3.00 | 1.00 | 29.00  | 29.00  | 1.80   |
| 1.00 | 1.00 | 2.00 | 16.00 | 1.00 | 1.00 | 16.00  | 16.00  | -7.20  |
| 1.00 | 1.00 | 2.00 | 22.00 | 2.00 | 1.00 | 22.00  | 22.00  | -11.40 |
| 2.00 | 0.00 | 2.00 | 26.00 | 3.00 | 1.00 | 26.00  | 52.00  | -7.40  |
| 1.00 | 1.00 | 1.00 | 11.00 | 1.00 | 1.00 | 11.00  | 11.00  | 2.60   |
| 3.00 | 0.00 | 2.00 | 51.00 | 4.00 | 1.00 | 51.00  | 102.00 | 1.30   |
| 2.00 | 0.00 | 2.00 | 30.00 | 3.00 | 1.00 | 30.00  | 30.00  | -3.50  |
| 1.00 | 1.00 | 2.00 | 19.00 | 2.00 | 2.00 | 38.00  | 38.00  | 9.60   |
| 1.00 | 1.00 | 2.00 | 21.00 | 2.00 | 1.00 | 21.00  | 42.00  | -14.50 |
| 1.00 | 1.00 | 1.00 | 19.00 | 2.00 | 1.00 | 19.00  | 38.00  | 0.50   |
| 2.00 | 0.00 | 1.00 | 26.00 | 3.00 | 1.00 | 26.00  | 52.00  | -3.20  |
| 3.00 | 0.00 | 2.00 | 44.00 | 4.00 | 2.00 | 88.00  | 88.00  | 7.60   |
| 1.00 | 1.00 | 2.00 | 14.00 | 1.00 | 1.00 | 14.00  | 14.00  | -6.90  |
| 3.00 | 0.00 | 2.00 | 46.00 | 4.00 | 1.00 | 46.00  | 46.00  | 0.90   |
| 1.00 | 1.00 | 2.00 | 8.00  | 1.00 | 2.00 | 16.00  | 8.00   | 7.60   |
| 1.00 | 1.00 | 1.00 | 13.00 | 1.00 | 1.00 | 13.00  | 13.00  | 8.60   |
| 1.00 | 1.00 | 2.00 | 17.00 | 1.00 | 1.00 | 17.00  | 17.00  | -5.60  |
| 3.00 | 0.00 | 1.00 | 44.00 | 4.00 | 2.00 | 88.00  | 88.00  | 7.50   |
| 3.00 | 0.00 | 2.00 | 52.00 | 4.00 | 1.00 | 52.00  | 104.00 | -0.50  |
| 1.00 | 1.00 | 1.00 | 15.00 | 1.00 | 1.00 | 15.00  | 15.00  | -6.50  |
| 3.00 | 0.00 | 2.00 | 45.00 | 4.00 | 1.00 | 45.00  | 45.00  | -1.50  |
| 3.00 | 0.00 | 2.00 | 51.00 | 4.00 | 1.00 | 51.00  | 51.00  | 2.00   |
| 2.00 | 0.00 | 2.00 | 35.00 | 3.00 | 1.00 | 35.00  | 70.00  | -0.50  |
| 1.00 | 1.00 | 2.00 | 20.00 | 2.00 | 1.00 | 20.00  | 20.00  | -11.50 |
| 1.00 | 1.00 | 2.00 | 12.00 | 1.00 | 1.00 | 12.00  | 24.00  | 5.50   |

|      |      |      |       |      |      |        |        |        |
|------|------|------|-------|------|------|--------|--------|--------|
| 3.00 | 0.00 | 1.00 | 50.00 | 4.00 | 2.00 | 100.00 | 50.00  | 4.50   |
| 1.00 | 1.00 | 2.00 | 15.00 | 1.00 | 1.00 | 15.00  | 30.00  | -4.50  |
| 2.00 | 0.00 | 2.00 | 32.00 | 3.00 | 1.00 | 32.00  | 64.00  | -6.10  |
| 3.00 | 0.00 | 1.00 | 36.00 | 4.00 | 1.00 | 36.00  | 72.00  | -5.50  |
| 1.00 | 1.00 | 1.00 | 11.00 | 1.00 | 2.00 | 22.00  | 22.00  | 3.50   |
| 3.00 | 0.00 | 1.00 | 48.00 | 4.00 | 2.00 | 96.00  | 48.00  | 8.50   |
| 1.00 | 1.00 | 1.00 | 22.00 | 2.00 | 2.00 | 44.00  | 22.00  | 3.40   |
| 1.00 | 1.00 | 1.00 | 21.00 | 2.00 | 1.00 | 21.00  | 21.00  | -7.50  |
| 3.00 | 0.00 | 1.00 | 36.00 | 4.00 | 2.00 | 72.00  | 72.00  | 5.00   |
| 1.00 | 1.00 | 1.00 | 15.00 | 1.00 | 1.00 | 15.00  | 15.00  | -3.30  |
| 1.00 | 1.00 | 2.00 | 14.00 | 1.00 | 1.00 | 14.00  | 14.00  | 6.50   |
| 3.00 | 0.00 | 2.00 | 45.00 | 4.00 | 1.00 | 45.00  | 90.00  | -3.50  |
| 1.00 | 1.00 | 1.00 | 12.00 | 1.00 | 1.00 | 12.00  | 24.00  | 0.50   |
| 1.00 | 1.00 | 2.00 | 12.00 | 1.00 | 1.00 | 12.00  | 24.00  | 1.50   |
| 1.00 | 1.00 | 2.00 | 9.00  | 1.00 | 2.00 | 18.00  | 18.00  | 3.60   |
| 1.00 | 1.00 | 1.00 | 23.00 | 2.00 | 2.00 | 46.00  | 23.00  | 8.50   |
| 4.00 | 0.00 | 2.00 | 67.00 | 5.00 | 1.00 | 67.00  | 67.00  | -3.50  |
| 1.00 | 1.00 | 2.00 | 16.00 | 1.00 | 1.00 | 16.00  | 16.00  | -15.50 |
| 4.00 | 0.00 | 2.00 | 81.00 | 5.00 | 1.00 | 81.00  | 81.00  | -0.60  |
| 2.00 | 0.00 | 2.00 | 33.00 | 3.00 | 2.00 | 66.00  | 66.00  | 2.70   |
| 1.00 | 1.00 | 1.00 | 12.00 | 1.00 | 1.00 | 12.00  | 12.00  | 8.50   |
| 2.00 | 0.00 | 1.00 | 25.00 | 3.00 | 2.00 | 50.00  | 25.00  | 14.50  |
| 1.00 | 1.00 | 1.00 | 13.00 | 1.00 | 2.00 | 26.00  | 13.00  | 4.50   |
| 1.00 | 1.00 | 2.00 | 21.00 | 2.00 | 1.00 | 21.00  | 21.00  | -14.50 |
| 1.00 | 1.00 | 1.00 | 12.00 | 1.00 | 1.00 | 12.00  | 12.00  | 0.00   |
| 3.00 | 0.00 | 2.00 | 47.00 | 4.00 | 1.00 | 47.00  | 94.00  | -1.50  |
| 3.00 | 0.00 | 2.00 | 46.00 | 4.00 | 1.00 | 46.00  | 46.00  | -11.20 |
| 1.00 | 1.00 | 2.00 | 18.00 | 2.00 | 1.00 | 18.00  | 36.00  | -13.50 |
| 3.00 | 0.00 | 1.00 | 52.00 | 4.00 | 1.00 | 52.00  | 52.00  | -9.50  |
| 1.00 | 1.00 | 1.00 | 13.00 | 1.00 | 1.00 | 13.00  | 26.00  | -3.50  |
| 1.00 | 1.00 | 1.00 | 11.00 | 1.00 | 2.00 | 22.00  | 22.00  | 6.60   |
| 1.00 | 1.00 | 1.00 | 13.00 | 1.00 | 1.00 | 13.00  | 13.00  | -1.50  |
| 1.00 | 1.00 | 2.00 | 21.00 | 2.00 | 2.00 | 42.00  | 42.00  | -6.30  |
| 2.00 | 0.00 | 2.00 | 26.00 | 3.00 | 1.00 | 26.00  | 52.00  | -11.50 |
| 3.00 | 0.00 | 2.00 | 52.00 | 4.00 | 1.00 | 52.00  | 104.00 | -2.30  |
| 1.00 | 1.00 | 2.00 | 10.00 | 1.00 | 2.00 | 20.00  | 20.00  | 7.50   |
| 1.00 | 1.00 | 1.00 | 14.00 | 1.00 | 1.00 | 14.00  | 14.00  | -4.50  |
| 1.00 | 1.00 | 1.00 | 19.00 | 2.00 | 1.00 | 19.00  | 19.00  | -2.50  |
| 1.00 | 1.00 | 2.00 | 19.00 | 2.00 | 1.00 | 19.00  | 19.00  | -5.50  |
| 1.00 | 1.00 | 1.00 | 16.00 | 1.00 | 1.00 | 16.00  | 32.00  | -7.50  |
| 3.00 | 0.00 | 2.00 | 49.00 | 4.00 | 2.00 | 98.00  | 49.00  | 14.70  |
| 1.00 | 1.00 | 1.00 | 16.00 | 1.00 | 1.00 | 16.00  | 32.00  | -3.30  |
| 4.00 | 0.00 | 1.00 | 85.00 | 5.00 | 1.00 | 85.00  | 85.00  | 4.50   |
| 3.00 | 0.00 | 1.00 | 58.00 | 4.00 | 1.00 | 58.00  | 116.00 | 1.20   |
| 1.00 | 1.00 | 1.00 | 20.00 | 2.00 | 1.00 | 20.00  | 20.00  | -11.10 |
| 1.00 | 1.00 | 1.00 | 14.00 | 1.00 | 1.00 | 14.00  | 28.00  | 6.20   |
| 1.00 | 1.00 | 1.00 | 13.00 | 1.00 | 1.00 | 13.00  | 26.00  | -0.30  |

|      |      |      |       |      |      |        |        |        |
|------|------|------|-------|------|------|--------|--------|--------|
| 3.00 | 0.00 | 1.00 | 45.00 | 4.00 | 2.00 | 90.00  | 90.00  | 6.50   |
| 2.00 | 0.00 | 1.00 | 24.00 | 3.00 | 2.00 | 48.00  | 48.00  | -9.50  |
| 1.00 | 1.00 | 1.00 | 16.00 | 1.00 | 1.00 | 16.00  | 16.00  | 2.00   |
| 2.00 | 0.00 | 2.00 | 31.00 | 3.00 | 2.00 | 62.00  | 62.00  | 4.50   |
| 1.00 | 1.00 | 1.00 | 22.00 | 2.00 | 1.00 | 22.00  | 22.00  | -11.00 |
| 4.00 | 0.00 | 2.00 | 73.00 | 5.00 | 2.00 | 146.00 | 146.00 | 16.50  |
| 1.00 | 1.00 | 2.00 | 14.00 | 1.00 | 1.00 | 14.00  | 28.00  | -2.50  |
| 3.00 | 0.00 | 2.00 | 36.00 | 4.00 | 2.00 | 72.00  | 36.00  | 7.50   |
| 1.00 | 1.00 | 2.00 | 12.00 | 1.00 | 1.00 | 12.00  | 24.00  | -4.50  |
| 3.00 | 0.00 | 2.00 | 44.00 | 4.00 | 1.00 | 44.00  | 44.00  | -10.50 |
| 1.00 | 1.00 | 2.00 | 14.00 | 1.00 | 1.00 | 14.00  | 14.00  | 1.90   |
| 3.00 | 0.00 | 2.00 | 45.00 | 4.00 | 1.00 | 45.00  | 90.00  | -14.00 |
| 1.00 | 1.00 | 2.00 | 16.00 | 1.00 | 1.00 | 16.00  | 16.00  | 6.50   |
| 2.00 | 0.00 | 2.00 | 24.00 | 3.00 | 1.00 | 24.00  | 48.00  | 0.50   |
| 1.00 | 1.00 | 2.00 | 22.00 | 2.00 | 1.00 | 22.00  | 22.00  | -9.20  |
| 2.00 | 0.00 | 1.00 | 24.00 | 3.00 | 2.00 | 48.00  | 24.00  | 3.60   |
| 1.00 | 1.00 | 2.00 | 15.00 | 1.00 | 1.00 | 15.00  | 15.00  | 5.00   |
| 1.00 | 1.00 | 1.00 | 15.00 | 1.00 | 1.00 | 15.00  | 15.00  | -0.20  |
| 1.00 | 1.00 | 2.00 | 16.00 | 1.00 | 1.00 | 16.00  | 32.00  | -1.50  |
| 2.00 | 0.00 | 1.00 | 29.00 | 3.00 | 1.00 | 29.00  | 29.00  | -14.00 |
| 1.00 | 1.00 | 2.00 | 14.00 | 1.00 | 1.00 | 14.00  | 14.00  | -4.50  |
| 2.00 | 0.00 | 2.00 | 35.00 | 3.00 | 2.00 | 70.00  | 70.00  | 6.70   |
| 1.00 | 1.00 | 1.00 | 11.00 | 1.00 | 1.00 | 11.00  | 22.00  | -9.00  |
| 1.00 | 1.00 | 1.00 | 21.00 | 2.00 | 1.00 | 21.00  | 42.00  | -6.00  |
| 2.00 | 0.00 | 2.00 | 35.00 | 3.00 | 2.00 | 70.00  | 35.00  | 10.00  |
| 1.00 | 1.00 | 1.00 | 18.00 | 2.00 | 1.00 | 18.00  | 36.00  | -3.20  |
| 1.00 | 1.00 | 2.00 | 12.00 | 1.00 | 1.00 | 12.00  | 24.00  | 5.80   |
| 1.00 | 1.00 | 1.00 | 22.00 | 2.00 | 1.00 | 22.00  | 22.00  | -9.40  |
| 3.00 | 0.00 | 1.00 | 47.00 | 4.00 | 1.00 | 47.00  | 47.00  | -6.00  |
| 3.00 | 0.00 | 2.00 | 43.00 | 4.00 | 2.00 | 86.00  | 43.00  | 10.00  |
| 1.00 | 1.00 | 1.00 | 16.00 | 1.00 | 1.00 | 16.00  | 16.00  | 6.10   |
| 1.00 | 1.00 | 1.00 | 9.00  | 1.00 | 2.00 | 18.00  | 9.00   | 5.20   |
| 3.00 | 0.00 | 1.00 | 46.00 | 4.00 | 1.00 | 46.00  | 46.00  | -11.30 |
| 2.00 | 0.00 | 2.00 | 27.00 | 3.00 | 2.00 | 54.00  | 27.00  | 7.00   |
| 1.00 | 1.00 | 2.00 | 18.00 | 2.00 | 1.00 | 18.00  | 18.00  | -3.10  |
| 1.00 | 1.00 | 1.00 | 19.00 | 2.00 | 1.00 | 19.00  | 38.00  | -10.50 |
| 3.00 | 0.00 | 1.00 | 36.00 | 4.00 | 2.00 | 72.00  | 36.00  | 6.90   |
| 1.00 | 1.00 | 1.00 | 17.00 | 1.00 | 1.00 | 17.00  | 34.00  | -9.00  |
| 4.00 | 0.00 | 2.00 | 75.00 | 5.00 | 1.00 | 75.00  | 75.00  | -10.00 |
| 1.00 | 1.00 | 1.00 | 21.00 | 2.00 | 1.00 | 21.00  | 21.00  | -15.50 |
| 4.00 | 0.00 | 2.00 | 68.00 | 5.00 | 2.00 | 136.00 | 136.00 | 17.50  |
| 1.00 | 1.00 | 2.00 | 11.00 | 1.00 | 1.00 | 11.00  | 22.00  | -6.70  |
| 1.00 | 1.00 | 1.00 | 14.00 | 1.00 | 1.00 | 14.00  | 14.00  | 1.80   |
| 3.00 | 0.00 | 2.00 | 44.00 | 4.00 | 2.00 | 88.00  | 88.00  | 3.00   |
| 3.00 | 0.00 | 1.00 | 51.00 | 4.00 | 1.00 | 51.00  | 102.00 | -7.00  |
| 1.00 | 1.00 | 2.00 | 9.00  | 1.00 | 2.00 | 18.00  | 18.00  | -2.00  |
| 3.00 | 0.00 | 2.00 | 47.00 | 4.00 | 1.00 | 47.00  | 94.00  | -4.20  |

|      |      |      |       |      |      |        |        |        |
|------|------|------|-------|------|------|--------|--------|--------|
| 1.00 | 1.00 | 1.00 | 10.00 | 1.00 | 1.00 | 10.00  | 10.00  | 7.50   |
| 2.00 | 0.00 | 1.00 | 25.00 | 3.00 | 2.00 | 50.00  | 50.00  | 4.90   |
| 1.00 | 1.00 | 2.00 | 10.00 | 1.00 | 1.00 | 10.00  | 20.00  | 13.50  |
| 2.00 | 0.00 | 2.00 | 29.00 | 3.00 | 1.00 | 29.00  | 29.00  | 0.70   |
| 3.00 | 0.00 | 1.00 | 38.00 | 4.00 | 2.00 | 76.00  | 76.00  | 3.50   |
| 1.00 | 1.00 | 2.00 | 20.00 | 2.00 | 1.00 | 20.00  | 40.00  | -10.50 |
| 1.00 | 1.00 | 2.00 | 10.00 | 1.00 | 1.00 | 10.00  | 20.00  | -0.50  |
| 4.00 | 0.00 | 2.00 | 70.00 | 5.00 | 2.00 | 140.00 | 140.00 | 3.00   |
| 1.00 | 1.00 | 1.00 | 19.00 | 2.00 | 1.00 | 19.00  | 19.00  | -2.00  |
| 2.00 | 0.00 | 2.00 | 32.00 | 3.00 | 1.00 | 32.00  | 32.00  | -1.10  |
| 2.00 | 0.00 | 2.00 | 28.00 | 3.00 | 2.00 | 56.00  | 28.00  | 5.60   |
| 2.00 | 0.00 | 2.00 | 26.00 | 3.00 | 1.00 | 26.00  | 52.00  | -0.50  |
| 1.00 | 1.00 | 2.00 | 11.00 | 1.00 | 1.00 | 11.00  | 22.00  | 4.50   |
| 1.00 | 1.00 | 2.00 | 13.00 | 1.00 | 1.00 | 13.00  | 13.00  | 11.50  |
| 3.00 | 0.00 | 2.00 | 36.00 | 4.00 | 1.00 | 36.00  | 36.00  | -4.50  |
| 3.00 | 0.00 | 1.00 | 43.00 | 4.00 | 1.00 | 43.00  | 43.00  | -4.50  |
| 4.00 | 0.00 | 2.00 | 61.00 | 5.00 | 1.00 | 61.00  | 122.00 | -5.50  |
| 1.00 | 1.00 | 2.00 | 9.00  | 1.00 | 1.00 | 9.00   | 9.00   | 1.50   |
| 1.00 | 1.00 | 1.00 | 19.00 | 2.00 | 1.00 | 19.00  | 38.00  | -8.30  |
| 4.00 | 0.00 | 1.00 | 70.00 | 5.00 | 1.00 | 70.00  | 70.00  | -10.50 |
| 1.00 | 1.00 | 1.00 | 15.00 | 1.00 | 1.00 | 15.00  | 15.00  | 4.40   |
| 3.00 | 0.00 | 2.00 | 45.00 | 4.00 | 2.00 | 90.00  | 90.00  | 11.10  |
| 2.00 | 0.00 | 2.00 | 30.00 | 3.00 | 2.00 | 60.00  | 60.00  | 6.20   |
| 1.00 | 1.00 | 1.00 | 22.00 | 2.00 | 1.00 | 22.00  | 44.00  | -10.40 |
| 2.00 | 0.00 | 2.00 | 31.00 | 3.00 | 1.00 | 31.00  | 31.00  | -16.50 |
| 1.00 | 1.00 | 2.00 | 18.00 | 2.00 | 1.00 | 18.00  | 36.00  | -3.00  |
| 1.00 | 1.00 | 1.00 | 12.00 | 1.00 | 1.00 | 12.00  | 24.00  | -2.90  |
| 4.00 | 0.00 | 2.00 | 61.00 | 5.00 | 1.00 | 61.00  | 122.00 | -11.20 |
| 4.00 | 0.00 | 1.00 | 62.00 | 5.00 | 2.00 | 124.00 | 62.00  | 12.70  |
| 1.00 | 1.00 | 2.00 | 20.00 | 2.00 | 1.00 | 20.00  | 40.00  | -12.00 |
| 1.00 | 1.00 | 1.00 | 17.00 | 1.00 | 1.00 | 17.00  | 17.00  | 10.60  |
| 3.00 | 0.00 | 1.00 | 55.00 | 4.00 | 2.00 | 110.00 | 55.00  | 14.50  |
| 3.00 | 0.00 | 2.00 | 49.00 | 4.00 | 2.00 | 98.00  | 49.00  | 12.50  |
| 1.00 | 1.00 | 2.00 | 13.00 | 1.00 | 1.00 | 13.00  | 26.00  | 3.40   |
| 3.00 | 0.00 | 2.00 | 36.00 | 4.00 | 2.00 | 72.00  | 36.00  | 16.50  |
| 3.00 | 0.00 | 2.00 | 41.00 | 4.00 | 2.00 | 82.00  | 41.00  | 6.60   |
| 1.00 | 1.00 | 2.00 | 15.00 | 1.00 | 1.00 | 15.00  | 30.00  | -2.20  |
| 3.00 | 0.00 | 1.00 | 53.00 | 4.00 | 2.00 | 106.00 | 53.00  | 0.00   |
| 1.00 | 1.00 | 2.00 | 20.00 | 2.00 | 1.00 | 20.00  | 20.00  | -7.30  |
| 4.00 | 0.00 | 2.00 | 71.00 | 5.00 | 2.00 | 142.00 | 142.00 | 3.00   |
| 1.00 | 1.00 | 2.00 | 13.00 | 1.00 | 1.00 | 13.00  | 26.00  | 5.00   |
| 1.00 | 1.00 | 2.00 | 14.00 | 1.00 | 1.00 | 14.00  | 28.00  | -1.00  |
| 4.00 | 0.00 | 2.00 | 61.00 | 5.00 | 2.00 | 122.00 | 122.00 | 19.50  |
| 1.00 | 1.00 | 1.00 | 20.00 | 2.00 | 1.00 | 20.00  | 40.00  | -2.50  |
| 4.00 | 0.00 | 2.00 | 70.00 | 5.00 | 1.00 | 70.00  | 70.00  | -11.30 |
| 1.00 | 1.00 | 2.00 | 14.00 | 1.00 | 1.00 | 14.00  | 14.00  | -2.50  |
| 3.00 | 0.00 | 2.00 | 50.00 | 4.00 | 2.00 | 100.00 | 50.00  | 19.50  |

|      |      |      |       |      |      |        |        |        |
|------|------|------|-------|------|------|--------|--------|--------|
| 3.00 | 0.00 | 2.00 | 59.00 | 4.00 | 2.00 | 118.00 | 118.00 | 10.50  |
| 1.00 | 1.00 | 2.00 | 15.00 | 1.00 | 1.00 | 15.00  | 15.00  | 6.50   |
| 1.00 | 1.00 | 2.00 | 14.00 | 1.00 | 1.00 | 14.00  | 28.00  | -3.50  |
| 1.00 | 1.00 | 2.00 | 18.00 | 2.00 | 1.00 | 18.00  | 18.00  | -2.00  |
| 4.00 | 0.00 | 1.00 | 72.00 | 5.00 | 2.00 | 144.00 | 144.00 | 24.10  |
| 1.00 | 1.00 | 2.00 | 12.00 | 1.00 | 1.00 | 12.00  | 12.00  | -0.10  |
| 4.00 | 0.00 | 2.00 | 68.00 | 5.00 | 2.00 | 136.00 | 68.00  | 8.50   |
| 1.00 | 1.00 | 2.00 | 13.00 | 1.00 | 1.00 | 13.00  | 26.00  | 1.50   |
| 3.00 | 0.00 | 2.00 | 54.00 | 4.00 | 2.00 | 108.00 | 108.00 | 8.50   |
| 1.00 | 1.00 | 2.00 | 13.00 | 1.00 | 1.00 | 13.00  | 26.00  | 8.50   |
| 3.00 | 0.00 | 2.00 | 48.00 | 4.00 | 2.00 | 96.00  | 96.00  | 8.50   |
| 1.00 | 1.00 | 2.00 | 18.00 | 2.00 | 1.00 | 18.00  | 36.00  | -2.00  |
| 1.00 | 1.00 | 2.00 | 13.00 | 1.00 | 1.00 | 13.00  | 26.00  | -1.00  |
| 4.00 | 0.00 | 2.00 | 75.00 | 5.00 | 1.00 | 75.00  | 75.00  | -2.20  |
| 1.00 | 1.00 | 2.00 | 21.00 | 2.00 | 1.00 | 21.00  | 21.00  | -6.60  |
| 3.00 | 0.00 | 2.00 | 38.00 | 4.00 | 2.00 | 76.00  | 76.00  | 12.00  |
| 1.00 | 1.00 | 2.00 | 10.00 | 1.00 | 1.00 | 10.00  | 10.00  | 6.70   |
| 2.00 | 0.00 | 2.00 | 35.00 | 3.00 | 1.00 | 35.00  | 35.00  | -16.90 |
| 3.00 | 0.00 | 2.00 | 40.00 | 4.00 | 1.00 | 40.00  | 80.00  | -2.30  |
| 1.00 | 1.00 | 2.00 | 9.00  | 1.00 | 1.00 | 9.00   | 18.00  | 7.00   |
| 1.00 | 1.00 | 2.00 | 19.00 | 2.00 | 1.00 | 19.00  | 19.00  | -4.60  |
| 3.00 | 0.00 | 2.00 | 48.00 | 4.00 | 2.00 | 96.00  | 48.00  | 13.20  |
| 4.00 | 0.00 | 2.00 | 65.00 | 5.00 | 2.00 | 130.00 | 65.00  | 11.00  |
| 1.00 | 1.00 | 1.00 | 15.00 | 1.00 | 1.00 | 15.00  | 30.00  | -4.00  |
| 3.00 | 0.00 | 2.00 | 41.00 | 4.00 | 2.00 | 82.00  | 82.00  | 11.00  |
| 1.00 | 1.00 | 1.00 | 10.00 | 1.00 | 2.00 | 20.00  | 20.00  | -1.50  |
| 2.00 | 0.00 | 2.00 | 28.00 | 3.00 | 2.00 | 56.00  | 56.00  | 0.60   |
| 1.00 | 1.00 | 2.00 | 10.00 | 1.00 | 1.00 | 10.00  | 20.00  | 2.60   |
| 1.00 | 1.00 | 2.00 | 17.00 | 1.00 | 1.00 | 17.00  | 17.00  | -1.20  |
| 1.00 | 1.00 | 2.00 | 23.00 | 2.00 | 2.00 | 46.00  | 23.00  | 19.30  |
| 2.00 | 0.00 | 2.00 | 31.00 | 3.00 | 2.00 | 62.00  | 62.00  | 2.50   |
| 1.00 | 1.00 | 2.00 | 14.00 | 1.00 | 1.00 | 14.00  | 14.00  | -0.90  |
| 3.00 | 0.00 | 1.00 | 43.00 | 4.00 | 2.00 | 86.00  | 43.00  | 12.80  |
| 1.00 | 1.00 | 2.00 | 11.00 | 1.00 | 1.00 | 11.00  | 22.00  | 3.00   |
| 1.00 | 1.00 | 1.00 | 20.00 | 2.00 | 1.00 | 20.00  | 40.00  | -2.70  |
| 3.00 | 0.00 | 2.00 | 44.00 | 4.00 | 1.00 | 44.00  | 88.00  | -9.40  |
| 3.00 | 0.00 | 2.00 | 40.00 | 4.00 | 1.00 | 40.00  | 80.00  | -11.70 |
| 1.00 | 1.00 | 1.00 | 11.00 | 1.00 | 2.00 | 22.00  | 22.00  | 8.50   |
| 3.00 | 0.00 | 2.00 | 54.00 | 4.00 | 2.00 | 108.00 | 54.00  | 5.60   |
| 1.00 | 1.00 | 1.00 | 18.00 | 2.00 | 1.00 | 18.00  | 36.00  | -11.90 |
| 3.00 | 0.00 | 2.00 | 47.00 | 4.00 | 1.00 | 47.00  | 47.00  | -12.30 |
| 1.00 | 1.00 | 1.00 | 18.00 | 2.00 | 1.00 | 18.00  | 36.00  | -6.60  |
| 1.00 | 1.00 | 2.00 | 16.00 | 1.00 | 1.00 | 16.00  | 16.00  | -8.40  |
| 1.00 | 1.00 | 1.00 | 13.00 | 1.00 | 1.00 | 13.00  | 26.00  | 2.00   |
| 1.00 | 1.00 | 2.00 | 20.00 | 2.00 | 1.00 | 20.00  | 40.00  | -16.50 |
| 1.00 | 1.00 | 2.00 | 19.00 | 2.00 | 1.00 | 19.00  | 38.00  | -9.50  |
| 3.00 | 0.00 | 2.00 | 54.00 | 4.00 | 1.00 | 54.00  | 108.00 | -3.00  |

|      |      |      |       |      |      |       |        |        |
|------|------|------|-------|------|------|-------|--------|--------|
| 1.00 | 1.00 | 1.00 | 18.00 | 2.00 | 1.00 | 18.00 | 18.00  | -3.50  |
| 2.00 | 0.00 | 1.00 | 32.00 | 3.00 | 1.00 | 32.00 | 32.00  | -17.00 |
| 1.00 | 1.00 | 1.00 | 17.00 | 1.00 | 1.00 | 17.00 | 34.00  | -11.00 |
| 3.00 | 0.00 | 1.00 | 50.00 | 4.00 | 1.00 | 50.00 | 100.00 | -16.90 |
| 1.00 | 1.00 | 2.00 | 12.00 | 1.00 | 2.00 | 24.00 | 12.00  | 2.60   |
| 3.00 | 0.00 | 2.00 | 36.00 | 4.00 | 2.00 | 72.00 | 72.00  | 9.80   |
| 1.00 | 1.00 | 2.00 | 10.00 | 1.00 | 1.00 | 10.00 | 10.00  | -0.30  |
| 3.00 | 0.00 | 2.00 | 46.00 | 4.00 | 1.00 | 46.00 | 46.00  | -2.50  |
| 1.00 | 1.00 | 2.00 | 17.00 | 1.00 | 1.00 | 17.00 | 34.00  | -1.00  |
| 3.00 | 0.00 | 1.00 | 54.00 | 4.00 | 1.00 | 54.00 | 54.00  | -3.00  |
| 4.00 | 0.00 | 2.00 | 61.00 | 5.00 | 1.00 | 61.00 | 61.00  | -11.20 |
| 1.00 | 1.00 | 2.00 | 20.00 | 2.00 | 1.00 | 20.00 | 20.00  | -12.00 |
| 1.00 | 1.00 | 2.00 | 21.00 | 2.00 | 1.00 | 21.00 | 21.00  | -2.30  |
| 3.00 | 0.00 | 2.00 | 46.00 | 4.00 | 1.00 | 46.00 | 46.00  | -3.00  |



| Zscore2 | Birth   | Postnatal3 | Preceding | Intervalrev | ageindex | ageprecedi | Intervalrev | Preceding2 |
|---------|---------|------------|-----------|-------------|----------|------------|-------------|------------|
| 2.12    | 3500.00 | 447.62     | 38.00     | 47.00       | 21       | 68         | 1.00        | 1.00       |
| 0.09    | 2900.00 | 563.64     | 22.00     | 31.00       | 11       | 42         | 1.00        | 0.00       |
| 1.92    | 3600.00 | 523.08     | 20.00     | 29.00       | 13       | 42         | 1.00        | 0.00       |
| -0.15   | 2900.00 | 575.00     | 23.00     | 32.00       | 8        | 40         | 1.00        | 0.00       |
| -1.53   | 3200.00 | 1000.00    | 52.00     | 61.00       | 2        | 63         | 1.00        | 1.00       |
| -0.19   | 3000.00 | 983.33     | 37.00     | 46.00       | 6        | 52         | 1.00        | 1.00       |
| 0.95    | 3500.00 | 450.00     | 22.00     | 13.00       | 12       | 25         | 0.00        | 0.00       |
| 0.32    | 3300.00 | 376.92     | 22.00     | 13.00       | 13       | 25         | 0.00        | 0.00       |
| -0.77   | 3500.00 | 975.00     | 63.00     | 72.00       | 4        | 76         | 1.00        | 1.00       |
| -0.45   | 3400.00 | 542.86     | 25.00     | 34.00       | 7        | 41         | 1.00        | 1.00       |
| -1.28   | 2400.00 | 1175.00    | 14.00     | 23.00       | 4        | 27         | 0.00        | 0.00       |
| -0.42   | 3600.00 | 1175.00    | 29.00     | 38.00       | 4        | 42         | 1.00        | 1.00       |
| -0.94   | 2600.00 | 960.00     | 10.00     | 19.00       | 5        | 24         | 0.00        | 0.00       |
| -0.46   | 2500.00 | 550.00     | 12.00     | 21.00       | 8        | 29         | 0.00        | 0.00       |
| -2.13   | 2100.00 | 666.67     | 86.00     | 95.00       | 3        | 98         | 1.00        | 1.00       |
| -0.95   | 2500.00 | 740.00     | 14.00     | 23.00       | 5        | 28         | 0.00        | 0.00       |
| -0.88   | 2600.00 | 933.33     | 28.00     | 37.00       | 6        | 43         | 1.00        | 1.00       |
| -1.12   | 4000.00 | 236.36     | 26.00     | 35.00       | 11       | 46         | 1.00        | 1.00       |
| -1.58   | 2700.00 | 1333.33    | 12.00     | 21.00       | 3        | 24         | 0.00        | 0.00       |
| -1.32   | 3000.00 | 1233.33    | 75.00     | 84.00       | 3        | 87         | 1.00        | 1.00       |
| -0.71   | 2700.00 | 920.00     | 67.00     | 76.00       | 5        | 81         | 1.00        | 1.00       |
| -0.71   | 2800.00 | 587.50     | 10.00     | 19.00       | 8        | 27         | 0.00        | 0.00       |
| 0.23    | 2800.00 | 862.50     | 55.00     | 64.00       | 8        | 72         | 1.00        | 1.00       |
| 1.56    | 2900.00 | 500.00     | 23.00     | 32.00       | 12       | 44         | 1.00        | 0.00       |
| 0.45    | 2500.00 | 357.89     | 44.00     | 53.00       | 19       | 72         | 1.00        | 1.00       |
| -1.19   | 3000.00 | 614.29     | 71.00     | 80.00       | 7        | 87         | 1.00        | 1.00       |
| -0.79   | 3300.00 | 1000.00    | 35.00     | 44.00       | 4        | 48         | 1.00        | 1.00       |
| 0.63    | 3200.00 | 644.44     | 26.00     | 35.00       | 9        | 44         | 1.00        | 1.00       |
| 1.08    | 3500.00 | 538.46     | 74.00     | 83.00       | 13       | 96         | 1.00        | 1.00       |
| 0.03    | 3100.00 | 825.00     | 25.00     | 34.00       | 8        | 42         | 1.00        | 1.00       |
| -0.27   | 2900.00 | 600.00     | 23.00     | 32.00       | 8        | 40         | 1.00        | 0.00       |
| -0.46   | 2700.00 | 785.71     | 16.00     | 25.00       | 7        | 32         | 1.00        | 0.00       |
| 0.42    | 2700.00 | 609.09     | 52.00     | 61.00       | 11       | 72         | 1.00        | 1.00       |
| -0.78   | 2400.00 | 509.09     | 19.00     | 28.00       | 11       | 39         | 1.00        | 0.00       |
| -0.41   | 2900.00 | 581.82     | 22.00     | 31.00       | 11       | 42         | 1.00        | 0.00       |
| -0.14   | 2800.00 | 1066.67    | 23.00     | 32.00       | 6        | 38         | 1.00        | 0.00       |
| 0.83    | 2600.00 | 545.00     | 16.00     | 25.00       | 20       | 45         | 1.00        | 0.00       |
| 0.83    | 2500.00 | 466.67     | 12.00     | 21.00       | 18       | 39         | 0.00        | 0.00       |
| 0.19    | 3000.00 | 409.09     | 22.00     | 31.00       | 11       | 42         | 1.00        | 0.00       |
| 0.58    | 2600.00 | 540.00     | 12.00     | 21.00       | 10       | 31         | 0.00        | 0.00       |
| 1.99    | 2900.00 | 379.17     | 38.00     | 47.00       | 24       | 71         | 1.00        | 1.00       |
| 0.35    | 2300.00 | 600.00     | 21.00     | 30.00       | 12       | 42         | 1.00        | 0.00       |
| 0.45    | 1700.00 | 633.33     | 21.00     | 30.00       | 12       | 42         | 1.00        | 0.00       |
| 0.56    | 3200.00 | 291.30     | 40.00     | 49.00       | 23       | 72         | 1.00        | 1.00       |
| 1.64    | 2800.00 | 383.33     | 31.00     | 40.00       | 24       | 64         | 1.00        | 1.00       |
| 1.64    | 3100.00 | 684.62     | 26.00     | 35.00       | 13       | 48         | 1.00        | 1.00       |

|       |         |         |       |       |    |    |      |      |
|-------|---------|---------|-------|-------|----|----|------|------|
| 0.53  | 2800.00 | 429.17  | 12.00 | 21.00 | 24 | 45 | 0.00 | 0.00 |
| -0.42 | 3400.00 | 571.43  | 24.00 | 15.00 | 7  | 22 | 0.00 | 1.00 |
| -0.28 | 2600.00 | 580.00  | 42.00 | 51.00 | 5  | 56 | 1.00 | 1.00 |
| -0.28 | 2900.00 | 666.67  | 57.00 | 66.00 | 6  | 72 | 1.00 | 1.00 |
| -0.65 | 2800.00 | 566.67  | 21.00 | 30.00 | 6  | 36 | 1.00 | 0.00 |
| -0.74 | 3000.00 | 1266.67 | 51.00 | 60.00 | 3  | 63 | 1.00 | 1.00 |
| -0.51 | 2600.00 | 400.00  | 21.00 | 30.00 | 11 | 41 | 1.00 | 0.00 |
| 1.22  | 2700.00 | 384.21  | 21.00 | 30.00 | 19 | 49 | 1.00 | 0.00 |
| 1.86  | 3150.00 | 285.42  | 39.00 | 48.00 | 24 | 72 | 1.00 | 1.00 |
| -0.32 | 3400.00 | 1220.00 | 10.00 | 19.00 | 5  | 24 | 0.00 | 0.00 |
| -0.32 | 2700.00 | 680.00  | 21.00 | 30.00 | 10 | 40 | 1.00 | 0.00 |
| -0.08 | 3900.00 | 328.57  | 21.00 | 30.00 | 14 | 44 | 1.00 | 0.00 |
| -1.47 | 2600.00 | 950.00  | 37.00 | 46.00 | 2  | 48 | 1.00 | 1.00 |
| 0.96  | 3100.00 | 360.00  | 20.00 | 29.00 | 20 | 49 | 1.00 | 0.00 |
| -0.83 | 2300.00 | 1050.00 | 21.00 | 30.00 | 4  | 34 | 1.00 | 0.00 |
| 0.58  | 2800.00 | 383.33  | 20.00 | 29.00 | 24 | 53 | 1.00 | 0.00 |
| -1.53 | 2900.00 | 1300.00 | 9.00  | 18.00 | 2  | 20 | 0.00 | 0.00 |
| -0.45 | 2700.00 | 484.62  | 14.00 | 23.00 | 13 | 36 | 0.00 | 0.00 |
| 1.51  | 2800.00 | 342.86  | 36.00 | 45.00 | 21 | 66 | 1.00 | 1.00 |
| -0.17 | 2400.00 | 683.33  | 14.00 | 23.00 | 6  | 29 | 0.00 | 0.00 |
| -0.45 | 3700.00 | 460.00  | 21.00 | 30.00 | 5  | 35 | 1.00 | 0.00 |
| 2.06  | 2700.00 | 359.09  | 21.00 | 30.00 | 22 | 52 | 1.00 | 0.00 |
| 1.42  | 2500.00 | 770.00  | 22.00 | 31.00 | 10 | 41 | 1.00 | 0.00 |
| -0.08 | 3000.00 | 720.00  | 26.00 | 35.00 | 5  | 40 | 1.00 | 1.00 |
| 1.26  | 3200.00 | 483.33  | 21.00 | 30.00 | 12 | 42 | 1.00 | 0.00 |
| -0.45 | 3100.00 | 614.29  | 22.00 | 31.00 | 7  | 38 | 1.00 | 0.00 |
| -0.21 | 3300.00 | 462.50  | 18.00 | 27.00 | 8  | 35 | 1.00 | 0.00 |
| 0.36  | 2600.00 | 436.36  | 11.00 | 20.00 | 11 | 31 | 0.00 | 0.00 |
| -0.71 | 3000.00 | 1025.00 | 11.00 | 20.00 | 4  | 24 | 0.00 | 0.00 |
| 1.22  | 2600.00 | 540.00  | 24.00 | 33.00 | 15 | 48 | 1.00 | 1.00 |
| 0.58  | 3000.00 | 1183.33 | 22.00 | 31.00 | 6  | 37 | 1.00 | 0.00 |
| 0.71  | 3300.00 | 294.44  | 9.00  | 18.00 | 18 | 36 | 0.00 | 0.00 |
| -0.55 | 2700.00 | 1100.00 | 9.00  | 18.00 | 3  | 21 | 0.00 | 0.00 |
| 0.32  | 3100.00 | 518.18  | 48.00 | 57.00 | 11 | 68 | 1.00 | 1.00 |
| 0.83  | 2700.00 | 400.00  | 46.00 | 55.00 | 17 | 72 | 1.00 | 1.00 |
| 0.19  | 2800.00 | 500.00  | 21.00 | 30.00 | 11 | 41 | 1.00 | 0.00 |
| 0.45  | 3000.00 | 630.00  | 22.00 | 31.00 | 10 | 41 | 1.00 | 0.00 |
| -0.32 | 2900.00 | 366.67  | 37.00 | 46.00 | 15 | 61 | 1.00 | 1.00 |
| -0.10 | 2400.00 | 800.00  | 22.00 | 31.00 | 7  | 38 | 1.00 | 0.00 |
| 0.83  | 3100.00 | 412.50  | 16.00 | 25.00 | 24 | 49 | 1.00 | 0.00 |
| -0.19 | 3200.00 | 252.63  | 27.00 | 36.00 | 19 | 55 | 1.00 | 1.00 |
| -0.18 | 2400.00 | 350.00  | 21.00 | 30.00 | 14 | 44 | 1.00 | 0.00 |
| -0.55 | 3400.00 | 860.00  | 24.00 | 33.00 | 5  | 38 | 1.00 | 1.00 |
| 1.10  | 2900.00 | 425.00  | 21.00 | 30.00 | 12 | 42 | 1.00 | 0.00 |
| 0.08  | 2600.00 | 509.09  | 52.00 | 61.00 | 11 | 72 | 1.00 | 1.00 |
| -1.01 | 3100.00 | 666.67  | 12.00 | 21.00 | 3  | 24 | 0.00 | 0.00 |
| -0.17 | 2900.00 | 700.00  | 20.00 | 29.00 | 5  | 34 | 1.00 | 0.00 |

|       |         |         |       |       |    |    |      |      |
|-------|---------|---------|-------|-------|----|----|------|------|
| 1.26  | 2900.00 | 265.22  | 25.00 | 34.00 | 23 | 57 | 1.00 | 1.00 |
| 0.35  | 3600.00 | 550.00  | 22.00 | 31.00 | 8  | 39 | 1.00 | 0.00 |
| -0.32 | 2900.00 | 600.00  | 34.00 | 43.00 | 5  | 48 | 1.00 | 1.00 |
| -0.76 | 2500.00 | 1400.00 | 22.00 | 31.00 | 3  | 34 | 1.00 | 0.00 |
| -0.24 | 2500.00 | 364.71  | 22.00 | 31.00 | 17 | 48 | 1.00 | 0.00 |
| -0.95 | 2800.00 | 533.33  | 22.00 | 31.00 | 6  | 37 | 1.00 | 0.00 |
| 0.19  | 2800.00 | 458.33  | 39.00 | 48.00 | 12 | 60 | 1.00 | 1.00 |
| 0.13  | 2600.00 | 1425.00 | 22.00 | 31.00 | 4  | 35 | 1.00 | 0.00 |
| -0.68 | 3300.00 | 420.00  | 48.00 | 57.00 | 10 | 67 | 1.00 | 1.00 |
| 0.95  | 2600.00 | 466.67  | 22.00 | 31.00 | 12 | 43 | 1.00 | 0.00 |
| -0.03 | 3000.00 | 533.33  | 30.00 | 39.00 | 9  | 48 | 1.00 | 1.00 |
| -0.04 | 3000.00 | 1600.00 | 23.00 | 32.00 | 3  | 35 | 1.00 | 0.00 |
| 1.79  | 3300.00 | 331.58  | 44.00 | 53.00 | 19 | 72 | 1.00 | 1.00 |
| 0.19  | 3000.00 | 675.00  | 29.00 | 38.00 | 8  | 46 | 1.00 | 1.00 |
| 2.41  | 3100.00 | 454.17  | 39.00 | 48.00 | 24 | 72 | 1.00 | 1.00 |
| -0.67 | 2900.00 | 1000.00 | 21.00 | 30.00 | 4  | 34 | 1.00 | 0.00 |
| -1.47 | 2900.00 | 650.00  | 11.00 | 20.00 | 4  | 24 | 0.00 | 0.00 |
| -0.45 | 3300.00 | 875.00  | 18.00 | 27.00 | 4  | 31 | 1.00 | 0.00 |
| 1.24  | 2700.00 | 393.75  | 35.00 | 44.00 | 16 | 60 | 1.00 | 1.00 |
| -2.00 | 2700.00 | 866.67  | 12.00 | 31.00 | 3  | 34 | 1.00 | 0.00 |
| 0.68  | 1900.00 | 475.00  | 18.00 | 27.00 | 20 | 47 | 1.00 | 0.00 |
| -0.15 | 2600.00 | 279.17  | 29.00 | 38.00 | 24 | 62 | 1.00 | 1.00 |
| -1.04 | 3200.00 | 666.67  | 10.00 | 19.00 | 3  | 22 | 0.00 | 0.00 |
| 2.18  | 2900.00 | 400.00  | 27.00 | 36.00 | 23 | 59 | 1.00 | 1.00 |
| 1.74  | 2600.00 | 321.74  | 33.00 | 42.00 | 23 | 65 | 1.00 | 1.00 |
| -0.78 | 3100.00 | 660.00  | 10.00 | 19.00 | 5  | 24 | 0.00 | 0.00 |
| -0.69 | 2300.00 | 760.00  | 20.00 | 29.00 | 5  | 34 | 1.00 | 0.00 |
| 0.78  | 3700.00 | 545.45  | 16.00 | 25.00 | 11 | 36 | 1.00 | 0.00 |
| -1.37 | 3300.00 | 700.00  | 9.00  | 18.00 | 4  | 22 | 0.00 | 0.00 |
| 0.35  | 2500.00 | 368.42  | 32.00 | 41.00 | 19 | 60 | 1.00 | 1.00 |
| -0.19 | 2600.00 | 914.29  | 14.00 | 23.00 | 7  | 30 | 0.00 | 0.00 |
| -1.32 | 3000.00 | 1000.00 | 11.00 | 20.00 | 3  | 23 | 0.00 | 0.00 |
| -1.58 | 3000.00 | 900.00  | 29.00 | 38.00 | 2  | 40 | 1.00 | 1.00 |
| 0.19  | 3300.00 | 900.00  | 10.00 | 19.00 | 5  | 24 | 0.00 | 0.00 |
| 0.59  | 3300.00 | 357.89  | 59.00 | 68.00 | 19 | 87 | 1.00 | 1.00 |
| -0.37 | 3000.00 | 633.33  | 12.00 | 21.00 | 6  | 27 | 0.00 | 0.00 |
| -1.28 | 3200.00 | 1400.00 | 12.00 | 21.00 | 2  | 23 | 0.00 | 0.00 |
| 1.09  | 2400.00 | 411.76  | 31.00 | 40.00 | 17 | 57 | 1.00 | 1.00 |
| -0.24 | 3000.00 | 487.50  | 21.00 | 20.00 | 8  | 28 | 0.00 | 0.00 |
| 0.83  | 2700.00 | 331.25  | 23.00 | 32.00 | 16 | 48 | 1.00 | 0.00 |
| 0.06  | 3200.00 | 666.67  | 14.00 | 23.00 | 6  | 29 | 0.00 | 0.00 |
| 0.49  | 3000.00 | 700.00  | 29.00 | 38.00 | 10 | 48 | 1.00 | 1.00 |
| -1.63 | 3400.00 | 1500.00 | 12.00 | 21.00 | 3  | 24 | 0.00 | 0.00 |
| 0.08  | 2900.00 | 418.18  | 21.00 | 30.00 | 11 | 41 | 1.00 | 0.00 |
| -0.14 | 2800.00 | 600.00  | 23.00 | 32.00 | 7  | 39 | 1.00 | 0.00 |
| -0.83 | 2600.00 | 475.00  | 12.00 | 21.00 | 8  | 29 | 0.00 | 0.00 |
| -0.77 | 2700.00 | 450.00  | 21.00 | 30.00 | 6  | 36 | 1.00 | 0.00 |

|       |         |         |       |       |    |     |      |      |
|-------|---------|---------|-------|-------|----|-----|------|------|
| 0.58  | 3200.00 | 381.82  | 52.00 | 61.00 | 22 | 83  | 1.00 | 1.00 |
| 0.09  | 2400.00 | 833.33  | 12.00 | 21.00 | 6  | 27  | 0.00 | 0.00 |
| 1.47  | 3300.00 | 368.42  | 17.00 | 26.00 | 19 | 45  | 1.00 | 0.00 |
| -0.83 | 3000.00 | 750.00  | 23.00 | 32.00 | 4  | 36  | 1.00 | 0.00 |
| -1.99 | 2900.00 | 1150.00 | 37.00 | 46.00 | 2  | 48  | 1.00 | 1.00 |
| 0.96  | 3000.00 | 675.00  | 12.00 | 21.00 | 8  | 29  | 0.00 | 0.00 |
| -0.45 | 3500.00 | 700.00  | 10.00 | 19.00 | 5  | 24  | 0.00 | 0.00 |
| -0.13 | 3000.00 | 814.29  | 32.00 | 41.00 | 7  | 48  | 1.00 | 1.00 |
| -0.35 | 2900.00 | 677.78  | 10.00 | 19.00 | 9  | 28  | 0.00 | 0.00 |
| 0.50  | 2600.00 | 435.71  | 12.00 | 21.00 | 14 | 132 | 0.00 | 0.00 |
| 0.45  | 3000.00 | 1000.00 | 10.00 | 19.00 | 5  | 24  | 0.00 | 0.00 |
| -2.12 | 3400.00 | 600.00  | 37.00 | 46.00 | 2  | 48  | 1.00 | 1.00 |
| 2.04  | 3300.00 | 380.00  | 20.00 | 29.00 | 20 | 49  | 1.00 | 0.00 |
| 0.96  | 3600.00 | 640.00  | 10.00 | 19.00 | 10 | 29  | 0.00 | 0.00 |
| 0.71  | 2800.00 | 382.35  | 40.00 | 49.00 | 17 | 66  | 1.00 | 1.00 |
| -0.45 | 3000.00 | 666.67  | 10.00 | 19.00 | 9  | 28  | 0.00 | 0.00 |
| 1.22  | 2600.00 | 262.50  | 21.00 | 30.00 | 24 | 54  | 1.00 | 0.00 |
| 0.45  | 3000.00 | 733.33  | 10.00 | 19.00 | 9  | 28  | 0.00 | 0.00 |
| 0.71  | 2600.00 | 335.29  | 60.00 | 79.00 | 17 | 96  | 1.00 | 1.00 |
| 0.32  | 4000.00 | 714.29  | 12.00 | 21.00 | 7  | 28  | 0.00 | 0.00 |
| 1.09  | 3000.00 | 368.75  | 23.00 | 32.00 | 16 | 48  | 1.00 | 0.00 |
| -1.77 | 2700.00 | 1275.00 | 12.00 | 21.00 | 4  | 25  | 0.00 | 0.00 |
| -0.32 | 3400.00 | 428.57  | 14.00 | 23.00 | 7  | 30  | 0.00 | 0.00 |
| 1.15  | 2800.00 | 273.91  | 28.00 | 37.00 | 23 | 60  | 1.00 | 1.00 |
| 1.73  | 3500.00 | 270.83  | 39.00 | 48.00 | 24 | 72  | 1.00 | 1.00 |
| -0.32 | 3400.00 | 422.22  | 12.00 | 21.00 | 9  | 30  | 0.00 | 0.00 |
| 1.03  | 2800.00 | 1063.64 | 61.00 | 70.00 | 11 | 81  | 1.00 | 1.00 |
| -1.47 | 2900.00 | 700.00  | 11.00 | 20.00 | 8  | 28  | 0.00 | 0.00 |
| -0.32 | 3000.00 | 766.67  | 36.00 | 45.00 | 6  | 51  | 1.00 | 1.00 |
| -0.23 | 2900.00 | 714.29  | 10.00 | 19.00 | 7  | 26  | 0.00 | 0.00 |
| 0.86  | 4200.00 | 315.79  | 26.00 | 35.00 | 19 | 54  | 1.00 | 1.00 |
| -0.83 | 2500.00 | 875.00  | 11.00 | 20.00 | 4  | 24  | 0.00 | 0.00 |
| 0.35  | 2500.00 | 453.85  | 27.00 | 36.00 | 13 | 49  | 1.00 | 1.00 |
| 1.32  | 2900.00 | 330.43  | 45.00 | 54.00 | 23 | 77  | 1.00 | 1.00 |
| 0.64  | 3200.00 | 685.71  | 10.00 | 19.00 | 7  | 26  | 0.00 | 0.00 |
| -1.83 | 3000.00 | 1000.00 | 10.00 | 19.00 | 2  | 21  | 0.00 | 0.00 |
| -0.38 | 2800.00 | 2000.00 | 12.00 | 31.00 | 3  | 24  | 1.00 | 0.00 |
| 1.00  | 2500.00 | 358.82  | 10.00 | 19.00 | 17 | 36  | 0.00 | 0.00 |
| -0.54 | 2500.00 | 411.11  | 12.00 | 31.00 | 9  | 40  | 1.00 | 0.00 |
| 0.10  | 3000.00 | 600.00  | 27.00 | 36.00 | 9  | 45  | 1.00 | 1.00 |
| -1.06 | 2600.00 | 816.67  | 16.00 | 25.00 | 6  | 31  | 1.00 | 0.00 |
| 0.73  | 3800.00 | 446.15  | 18.00 | 27.00 | 13 | 40  | 1.00 | 0.00 |
| 0.90  | 2900.00 | 750.00  | 21.00 | 30.00 | 8  | 38  | 1.00 | 0.00 |
| -0.92 | 2800.00 | 700.00  | 9.00  | 18.00 | 6  | 24  | 0.00 | 0.00 |
| 1.54  | 3100.00 | 352.17  | 52.00 | 61.00 | 23 | 84  | 1.00 | 1.00 |
| 1.15  | 2700.00 | 644.44  | 20.00 | 29.00 | 9  | 38  | 1.00 | 0.00 |
| -1.46 | 3400.00 | 728.57  | 10.00 | 19.00 | 7  | 26  | 0.00 | 0.00 |

|       |         |         |       |       |    |    |      |      |
|-------|---------|---------|-------|-------|----|----|------|------|
| 0.53  | 2900.00 | 265.22  | 16.00 | 25.00 | 23 | 48 | 1.00 | 0.00 |
| -0.63 | 3000.00 | 816.67  | 14.00 | 23.00 | 6  | 29 | 0.00 | 0.00 |
| 0.68  | 2500.00 | 736.36  | 21.00 | 30.00 | 11 | 41 | 1.00 | 0.00 |
| -0.04 | 3100.00 | 611.11  | 12.00 | 31.00 | 9  | 40 | 1.00 | 0.00 |
| -0.06 | 2100.00 | 600.00  | 37.00 | 46.00 | 9  | 55 | 1.00 | 1.00 |
| -0.31 | 2900.00 | 575.00  | 14.00 | 23.00 | 8  | 31 | 0.00 | 0.00 |
| 0.37  | 2900.00 | 454.55  | 21.00 | 30.00 | 11 | 41 | 1.00 | 0.00 |
| 0.17  | 3400.00 | 625.00  | 31.00 | 40.00 | 8  | 48 | 1.00 | 1.00 |
| -0.59 | 3400.00 | 840.00  | 37.00 | 46.00 | 5  | 51 | 1.00 | 1.00 |
| -0.14 | 2540.00 | 470.00  | 10.00 | 19.00 | 8  | 27 | 0.00 | 0.00 |
| -0.19 | 2300.00 | 400.00  | 45.00 | 54.00 | 15 | 69 | 1.00 | 1.00 |
| -0.47 | 2300.00 | 588.75  | 9.00  | 18.00 | 8  | 26 | 0.00 | 0.00 |
| 0.08  | 2500.00 | 408.33  | 32.00 | 41.00 | 12 | 53 | 1.00 | 1.00 |
| 1.06  | 2900.00 | 612.50  | 10.00 | 19.00 | 8  | 27 | 0.00 | 0.00 |
| -0.58 | 2500.00 | 600.00  | 19.00 | 28.00 | 10 | 38 | 1.00 | 0.00 |
| 0.68  | 3300.00 | 663.64  | 32.00 | 41.00 | 11 | 52 | 1.00 | 1.00 |
| -0.45 | 3000.00 | 1233.33 | 24.00 | 33.00 | 6  | 39 | 1.00 | 1.00 |
| -1.47 | 3900.00 | 275.00  | 27.00 | 36.00 | 4  | 40 | 1.00 | 1.00 |
| -0.51 | 3250.00 | 550.00  | 27.00 | 36.00 | 5  | 41 | 1.00 | 1.00 |
| 2.26  | 2900.00 | 408.33  | 26.00 | 35.00 | 24 | 59 | 1.00 | 1.00 |
| 1.17  | 3200.00 | 304.17  | 50.00 | 59.00 | 24 | 83 | 1.00 | 1.00 |
| 0.65  | 3200.00 | 685.71  | 24.00 | 33.00 | 7  | 40 | 1.00 | 1.00 |
| 2.15  | 3400.00 | 379.17  | 39.00 | 48.00 | 24 | 72 | 1.00 | 1.00 |
| -1.47 | 3120.00 | 626.67  | 11.00 | 20.00 | 3  | 23 | 0.00 | 0.00 |
| 0.29  | 2900.00 | 828.57  | 19.00 | 28.00 | 7  | 35 | 1.00 | 0.00 |
| -0.44 | 3000.00 | 633.33  | 21.00 | 30.00 | 6  | 36 | 1.00 | 0.00 |
| -1.09 | 2000.00 | 850.00  | 10.00 | 19.00 | 4  | 23 | 0.00 | 0.00 |
| -1.22 | 3200.00 | 800.00  | 29.00 | 38.00 | 3  | 41 | 1.00 | 1.00 |
| -0.56 | 2800.00 | 625.00  | 10.00 | 19.00 | 8  | 27 | 0.00 | 0.00 |
| 1.15  | 3400.00 | 283.33  | 51.00 | 60.00 | 24 | 84 | 1.00 | 1.00 |
| 0.15  | 3000.00 | 633.33  | 10.00 | 19.00 | 9  | 28 | 0.00 | 0.00 |
| -1.42 | 3500.00 | 650.00  | 43.00 | 52.00 | 2  | 54 | 1.00 | 1.00 |
| -0.83 | 2800.00 | 650.00  | 12.00 | 21.00 | 4  | 25 | 0.00 | 0.00 |
| -0.83 | 2900.00 | 1525.00 | 12.00 | 21.00 | 4  | 25 | 0.00 | 0.00 |
| 1.38  | 3000.00 | 290.00  | 55.00 | 64.00 | 20 | 84 | 1.00 | 1.00 |
| -0.56 | 2300.00 | 850.00  | 10.00 | 19.00 | 4  | 23 | 0.00 | 0.00 |
| -1.45 | 2600.00 | 1750.00 | 59.00 | 68.00 | 2  | 70 | 1.00 | 1.00 |
| 0.19  | 3100.00 | 671.43  | 83.00 | 92.00 | 7  | 99 | 1.00 | 1.00 |
| -0.19 | 3800.00 | 700.00  | 9.00  | 18.00 | 6  | 24 | 0.00 | 0.00 |
| 0.73  | 2400.00 | 508.33  | 21.00 | 30.00 | 12 | 42 | 1.00 | 0.00 |
| 0.90  | 2500.00 | 578.57  | 30.00 | 39.00 | 14 | 53 | 1.00 | 1.00 |
| -1.15 | 3200.00 | 342.86  | 22.00 | 31.00 | 7  | 38 | 1.00 | 0.00 |
| 0.14  | 3200.00 | 680.00  | 22.00 | 31.00 | 10 | 41 | 1.00 | 0.00 |
| 1.99  | 2800.00 | 395.83  | 26.00 | 35.00 | 24 | 59 | 1.00 | 1.00 |
| -0.06 | 2700.00 | 423.08  | 9.00  | 18.00 | 13 | 31 | 0.00 | 0.00 |
| -0.32 | 2700.00 | 1366.67 | 39.00 | 48.00 | 3  | 51 | 1.00 | 1.00 |
| -0.72 | 3200.00 | 760.00  | 45.00 | 54.00 | 5  | 59 | 1.00 | 1.00 |

|       |         |         |       |       |    |    |      |      |
|-------|---------|---------|-------|-------|----|----|------|------|
| -0.99 | 2700.00 | 840.00  | 10.00 | 19.00 | 5  | 24 | 0.00 | 0.00 |
| -0.60 | 3100.00 | 760.00  | 9.00  | 18.00 | 5  | 23 | 0.00 | 0.00 |
| -0.55 | 2900.00 | 650.00  | 10.00 | 19.00 | 6  | 25 | 0.00 | 0.00 |
| 1.15  | 2000.00 | 320.00  | 67.00 | 76.00 | 20 | 96 | 1.00 | 1.00 |
| -0.83 | 2800.00 | 800.00  | 22.00 | 31.00 | 5  | 36 | 1.00 | 0.00 |
| -0.99 | 3100.00 | 1002.50 | 29.00 | 38.00 | 4  | 42 | 1.00 | 1.00 |
| 0.22  | 2900.00 | 688.89  | 32.00 | 41.00 | 9  | 50 | 1.00 | 1.00 |
| 0.27  | 2300.00 | 530.00  | 18.00 | 27.00 | 10 | 37 | 1.00 | 0.00 |
| 0.15  | 2900.00 | 383.33  | 27.00 | 36.00 | 12 | 48 | 1.00 | 1.00 |
| 0.78  | 3000.00 | 541.67  | 12.00 | 21.00 | 12 | 33 | 0.00 | 0.00 |
| 0.77  | 2900.00 | 393.33  | 60.00 | 69.00 | 15 | 84 | 1.00 | 1.00 |
| 0.19  | 3300.00 | 610.00  | 22.00 | 31.00 | 10 | 41 | 1.00 | 0.00 |
| -1.22 | 2600.00 | 800.00  | 42.00 | 51.00 | 3  | 54 | 1.00 | 1.00 |
| 0.76  | 3200.00 | 644.44  | 12.00 | 21.00 | 9  | 30 | 0.00 | 0.00 |
| 0.91  | 3300.00 | 453.85  | 21.00 | 30.00 | 13 | 43 | 1.00 | 0.00 |
| -0.96 | 3400.00 | 1400.00 | 37.00 | 46.00 | 2  | 48 | 1.00 | 1.00 |
| 0.06  | 3000.00 | 844.44  | 12.00 | 21.00 | 9  | 30 | 0.00 | 0.00 |
| 1.33  | 2400.00 | 309.52  | 42.00 | 51.00 | 21 | 72 | 1.00 | 1.00 |
| 0.27  | 3100.00 | 418.18  | 10.00 | 19.00 | 11 | 30 | 0.00 | 0.00 |
| 1.03  | 3000.00 | 576.92  | 26.00 | 35.00 | 13 | 48 | 1.00 | 1.00 |
| -0.19 | 2900.00 | 883.33  | 9.00  | 18.00 | 6  | 24 | 0.00 | 0.00 |
| -0.41 | 3500.00 | 942.86  | 14.00 | 23.00 | 7  | 30 | 0.00 | 0.00 |
| 0.88  | 2400.00 | 366.67  | 12.00 | 21.00 | 15 | 36 | 0.00 | 0.00 |
| -0.47 | 3000.00 | 462.50  | 43.00 | 52.00 | 8  | 60 | 1.00 | 1.00 |
| 0.01  | 2200.00 | 663.75  | 10.00 | 19.00 | 8  | 27 | 0.00 | 0.00 |
| -0.05 | 3000.00 | 409.09  | 22.00 | 31.00 | 11 | 42 | 1.00 | 0.00 |
| -0.10 | 2800.00 | 637.50  | 19.00 | 28.00 | 8  | 36 | 1.00 | 0.00 |
| -0.29 | 2100.00 | 527.27  | 10.00 | 19.00 | 11 | 30 | 0.00 | 0.00 |
| -1.28 | 2500.00 | 1050.00 | 66.00 | 75.00 | 4  | 79 | 1.00 | 1.00 |
| -0.42 | 3400.00 | 716.67  | 22.00 | 31.00 | 6  | 37 | 1.00 | 0.00 |
| 2.06  | 3000.00 | 345.45  | 21.00 | 30.00 | 22 | 52 | 1.00 | 0.00 |
| -0.18 | 2400.00 | 350.00  | 10.00 | 19.00 | 14 | 33 | 0.00 | 0.00 |
| -1.35 | 2600.00 | 500.00  | 35.00 | 44.00 | 5  | 49 | 1.00 | 1.00 |
| 0.73  | 2600.00 | 279.17  | 25.00 | 34.00 | 24 | 58 | 1.00 | 1.00 |
| 0.69  | 2610.00 | 898.57  | 21.00 | 30.00 | 7  | 37 | 1.00 | 0.00 |
| 0.15  | 3000.00 | 800.00  | 22.00 | 31.00 | 5  | 36 | 1.00 | 0.00 |
| 1.56  | 2680.00 | 346.67  | 32.00 | 41.00 | 24 | 65 | 1.00 | 1.00 |
| -0.18 | 3100.00 | 811.11  | 22.00 | 31.00 | 9  | 40 | 1.00 | 0.00 |
| -0.83 | 2800.00 | 1233.33 | 12.00 | 21.00 | 3  | 24 | 0.00 | 0.00 |
| 1.77  | 2800.00 | 345.83  | 39.00 | 48.00 | 24 | 72 | 1.00 | 1.00 |
| 1.86  | 3000.00 | 291.67  | 15.00 | 24.00 | 24 | 48 | 1.00 | 0.00 |
| -0.69 | 2700.00 | 1160.00 | 8.00  | 17.00 | 5  | 22 | 0.00 | 0.00 |
| -0.42 | 3400.00 | 716.67  | 30.00 | 39.00 | 6  | 45 | 1.00 | 1.00 |
| -0.40 | 3100.00 | 816.67  | 57.00 | 66.00 | 6  | 72 | 1.00 | 1.00 |
| -0.19 | 2500.00 | 600.00  | 12.00 | 31.00 | 9  | 40 | 1.00 | 0.00 |
| 1.26  | 2700.00 | 453.85  | 27.00 | 36.00 | 13 | 49 | 1.00 | 1.00 |
| 1.18  | 3300.00 | 266.67  | 15.00 | 24.00 | 24 | 48 | 1.00 | 0.00 |

|       |         |         |       |       |    |    |      |      |
|-------|---------|---------|-------|-------|----|----|------|------|
| -1.19 | 3700.00 | 866.67  | 9.00  | 18.00 | 3  | 21 | 0.00 | 0.00 |
| -0.58 | 3700.00 | 920.00  | 63.00 | 72.00 | 5  | 77 | 1.00 | 1.00 |
| -1.54 | 3400.00 | 566.67  | 11.00 | 20.00 | 3  | 23 | 0.00 | 0.00 |
| -0.65 | 3300.00 | 450.00  | 17.00 | 26.00 | 6  | 32 | 1.00 | 0.00 |
| 1.56  | 2500.00 | 414.29  | 29.00 | 38.00 | 14 | 52 | 1.00 | 1.00 |
| 0.38  | 2500.00 | 677.78  | 10.00 | 19.00 | 9  | 38 | 0.00 | 0.00 |
| 0.19  | 2000.00 | 1200.00 | 16.00 | 25.00 | 6  | 31 | 1.00 | 0.00 |
| -0.83 | 2900.00 | 800.00  | 34.00 | 43.00 | 5  | 48 | 1.00 | 1.00 |
| 0.32  | 3100.00 | 450.00  | 22.00 | 31.00 | 12 | 43 | 1.00 | 0.00 |
| -1.99 | 3000.00 | 1333.33 | 32.00 | 41.00 | 3  | 44 | 1.00 | 1.00 |
| -0.19 | 2900.00 | 536.36  | 23.00 | 32.00 | 11 | 43 | 1.00 | 0.00 |
| 1.05  | 2600.00 | 327.78  | 44.00 | 53.00 | 18 | 71 | 1.00 | 1.00 |
| 0.06  | 3400.00 | 757.14  | 24.00 | 33.00 | 7  | 40 | 1.00 | 1.00 |
| 1.60  | 2900.00 | 285.00  | 24.00 | 33.00 | 20 | 53 | 1.00 | 1.00 |
| -0.19 | 2700.00 | 433.33  | 23.00 | 32.00 | 12 | 44 | 1.00 | 0.00 |
| 2.24  | 2900.00 | 478.26  | 67.00 | 76.00 | 23 | 99 | 1.00 | 1.00 |
| 0.32  | 3500.00 | 481.82  | 56.00 | 65.00 | 11 | 76 | 1.00 | 1.00 |
| -0.96 | 3000.00 | 1733.33 | 12.00 | 21.00 | 3  | 24 | 0.00 | 0.00 |
| -1.55 | 3500.00 | 1750.00 | 35.00 | 44.00 | 2  | 46 | 1.00 | 1.00 |
| -0.19 | 2800.00 | 536.36  | 29.00 | 38.00 | 11 | 49 | 1.00 | 1.00 |
| 0.64  | 3200.00 | 640.00  | 23.00 | 32.00 | 10 | 42 | 1.00 | 0.00 |
| 0.71  | 3100.00 | 423.08  | 77.00 | 86.00 | 13 | 99 | 1.00 | 1.00 |
| 0.23  | 3600.00 | 475.00  | 20.00 | 29.00 | 8  | 37 | 1.00 | 0.00 |
| -0.92 | 2700.00 | 675.00  | 14.00 | 23.00 | 4  | 27 | 0.00 | 0.00 |
| -1.46 | 2600.00 | 1550.00 | 13.00 | 22.00 | 2  | 24 | 0.00 | 0.00 |
| -0.95 | 2700.00 | 860.00  | 17.00 | 26.00 | 5  | 31 | 1.00 | 0.00 |
| 0.33  | 3000.00 | 527.27  | 24.00 | 33.00 | 11 | 44 | 1.00 | 1.00 |
| 0.17  | 3300.00 | 400.00  | 42.00 | 51.00 | 11 | 62 | 1.00 | 1.00 |
| -0.45 | 2800.00 | 680.00  | 21.00 | 30.00 | 5  | 35 | 1.00 | 0.00 |
| 1.23  | 2600.00 | 300.00  | 10.00 | 19.00 | 23 | 42 | 0.00 | 0.00 |
| -1.86 | 2900.00 | 1300.00 | 12.00 | 21.00 | 2  | 23 | 0.00 | 0.00 |
| 0.06  | 3200.00 | 860.00  | 10.00 | 19.00 | 5  | 24 | 0.00 | 0.00 |
| -0.41 | 3400.00 | 380.00  | 17.00 | 26.00 | 10 | 36 | 1.00 | 0.00 |
| 0.97  | 4500.00 | 312.50  | 35.00 | 44.00 | 16 | 60 | 1.00 | 1.00 |
| -0.88 | 2000.00 | 562.50  | 10.00 | 19.00 | 8  | 27 | 0.00 | 0.00 |
| 0.12  | 3800.00 | 711.11  | 37.00 | 46.00 | 9  | 55 | 1.00 | 1.00 |
| 0.97  | 2900.00 | 515.38  | 24.00 | 33.00 | 13 | 46 | 1.00 | 1.00 |
| 1.10  | 4400.00 | 581.82  | 25.00 | 34.00 | 11 | 45 | 1.00 | 1.00 |
| -0.72 | 2600.00 | 850.00  | 16.00 | 25.00 | 6  | 31 | 1.00 | 0.00 |
| 0.96  | 3200.00 | 438.89  | 35.00 | 44.00 | 18 | 62 | 1.00 | 1.00 |
| -0.06 | 3400.00 | 427.27  | 43.00 | 52.00 | 11 | 63 | 1.00 | 1.00 |
| -0.83 | 2600.00 | 583.33  | 12.00 | 21.00 | 6  | 27 | 0.00 | 0.00 |
| -0.19 | 3000.00 | 445.45  | 36.00 | 45.00 | 11 | 56 | 1.00 | 1.00 |
| 0.26  | 2500.00 | 627.27  | 42.00 | 51.00 | 11 | 62 | 1.00 | 1.00 |
| -0.06 | 3700.00 | 437.50  | 26.00 | 35.00 | 8  | 43 | 1.00 | 1.00 |
| -1.47 | 3900.00 | 725.00  | 11.00 | 20.00 | 4  | 24 | 0.00 | 0.00 |
| 0.71  | 2900.00 | 737.50  | 12.00 | 21.00 | 8  | 29 | 0.00 | 0.00 |

|       |         |         |       |       |    |    |      |      |
|-------|---------|---------|-------|-------|----|----|------|------|
| 0.58  | 3100.00 | 375.00  | 41.00 | 50.00 | 16 | 66 | 1.00 | 1.00 |
| -0.58 | 3100.00 | 1160.00 | 13.00 | 22.00 | 5  | 27 | 0.00 | 0.00 |
| -0.78 | 3100.00 | 850.00  | 23.00 | 32.00 | 6  | 38 | 1.00 | 0.00 |
| -0.71 | 3700.00 | 416.67  | 27.00 | 36.00 | 6  | 42 | 1.00 | 1.00 |
| 0.45  | 3500.00 | 376.92  | 22.00 | 31.00 | 13 | 44 | 1.00 | 0.00 |
| 1.09  | 3000.00 | 400.00  | 39.00 | 48.00 | 19 | 67 | 1.00 | 1.00 |
| 0.44  | 2900.00 | 438.46  | 13.00 | 22.00 | 13 | 35 | 0.00 | 0.00 |
| -0.96 | 3300.00 | 1400.00 | 12.00 | 21.00 | 3  | 24 | 0.00 | 0.00 |
| 0.64  | 2500.00 | 406.25  | 27.00 | 36.00 | 16 | 52 | 1.00 | 1.00 |
| -0.42 | 3200.00 | 550.00  | 24.00 | 33.00 | 8  | 41 | 1.00 | 1.00 |
| 0.83  | 3500.00 | 842.86  | 23.00 | 32.00 | 7  | 39 | 1.00 | 0.00 |
| -0.45 | 3100.00 | 960.00  | 36.00 | 45.00 | 5  | 50 | 1.00 | 1.00 |
| 0.06  | 2600.00 | 440.00  | 10.00 | 19.00 | 10 | 29 | 0.00 | 0.00 |
| 0.19  | 2700.00 | 900.00  | 10.00 | 19.00 | 7  | 26 | 0.00 | 0.00 |
| 0.46  | 2900.00 | 461.54  | 25.00 | 34.00 | 13 | 47 | 1.00 | 1.00 |
| 1.09  | 3100.00 | 388.24  | 14.00 | 23.00 | 17 | 40 | 0.00 | 0.00 |
| -0.45 | 3500.00 | 720.00  | 58.00 | 67.00 | 5  | 72 | 1.00 | 1.00 |
| -1.99 | 3100.00 | 800.00  | 25.00 | 34.00 | 3  | 37 | 1.00 | 1.00 |
| -0.08 | 3200.00 | 566.67  | 72.00 | 81.00 | 9  | 90 | 1.00 | 1.00 |
| 0.35  | 2700.00 | 266.67  | 24.00 | 33.00 | 18 | 51 | 1.00 | 1.00 |
| 1.09  | 3400.00 | 672.73  | 26.00 | 35.00 | 11 | 46 | 1.00 | 1.00 |
| 1.86  | 2900.00 | 312.50  | 16.00 | 25.00 | 24 | 49 | 1.00 | 0.00 |
| 0.58  | 2700.00 | 287.50  | 24.00 | 33.00 | 24 | 57 | 1.00 | 1.00 |
| -1.86 | 3600.00 | 300.00  | 12.00 | 21.00 | 2  | 23 | 0.00 | 0.00 |
| 0.00  | 3100.00 | 644.44  | 25.00 | 34.00 | 9  | 43 | 1.00 | 1.00 |
| -0.19 | 3900.00 | 625.00  | 38.00 | 47.00 | 8  | 55 | 1.00 | 1.00 |
| -1.44 | 3000.00 | 1250.00 | 37.00 | 46.00 | 2  | 48 | 1.00 | 1.00 |
| -1.73 | 2800.00 | 325.00  | 9.00  | 18.00 | 4  | 22 | 0.00 | 0.00 |
| -1.22 | 3400.00 | 800.00  | 43.00 | 52.00 | 2  | 54 | 1.00 | 1.00 |
| -0.45 | 2300.00 | 1300.00 | 10.00 | 19.00 | 4  | 23 | 0.00 | 0.00 |
| 0.85  | 3000.00 | 541.67  | 25.00 | 34.00 | 12 | 46 | 1.00 | 1.00 |
| -0.19 | 2900.00 | 1228.57 | 24.00 | 33.00 | 7  | 40 | 1.00 | 1.00 |
| -0.81 | 4100.00 | 141.18  | 12.00 | 21.00 | 17 | 38 | 0.00 | 0.00 |
| -1.47 | 3700.00 | 475.00  | 17.00 | 26.00 | 4  | 30 | 1.00 | 0.00 |
| -0.29 | 3100.00 | 780.00  | 43.00 | 52.00 | 5  | 57 | 1.00 | 1.00 |
| 0.96  | 3000.00 | 464.29  | 25.00 | 34.00 | 14 | 48 | 1.00 | 1.00 |
| -0.58 | 2600.00 | 1020.00 | 23.00 | 32.00 | 5  | 37 | 1.00 | 0.00 |
| -0.32 | 3000.00 | 600.00  | 10.00 | 19.00 | 5  | 24 | 0.00 | 0.00 |
| -0.71 | 2300.00 | 1125.00 | 10.00 | 19.00 | 4  | 23 | 0.00 | 0.00 |
| -0.96 | 3400.00 | 650.00  | 25.00 | 34.00 | 4  | 38 | 1.00 | 1.00 |
| 1.88  | 3000.00 | 404.35  | 40.00 | 49.00 | 23 | 72 | 1.00 | 1.00 |
| -0.42 | 3400.00 | 487.50  | 23.00 | 32.00 | 8  | 40 | 1.00 | 0.00 |
| 0.58  | 3600.00 | 509.09  | 76.00 | 85.00 | 11 | 96 | 1.00 | 1.00 |
| 0.15  | 3000.00 | 633.33  | 49.00 | 58.00 | 9  | 67 | 1.00 | 1.00 |
| -1.42 | 3000.00 | 833.33  | 11.00 | 20.00 | 3  | 23 | 0.00 | 0.00 |
| 0.79  | 3200.00 | 833.33  | 25.00 | 34.00 | 9  | 43 | 1.00 | 1.00 |
| -0.04 | 2800.00 | 650.00  | 24.00 | 33.00 | 8  | 41 | 1.00 | 1.00 |



|       |         |         |       |       |    |    |      |      |
|-------|---------|---------|-------|-------|----|----|------|------|
| 0.83  | 3100.00 | 360.00  | 36.00 | 45.00 | 15 | 60 | 1.00 | 1.00 |
| -1.22 | 3000.00 | 416.67  | 15.00 | 24.00 | 12 | 36 | 1.00 | 0.00 |
| 0.26  | 3300.00 | 1116.67 | 14.00 | 33.00 | 6  | 39 | 1.00 | 0.00 |
| 0.58  | 2700.00 | 255.56  | 22.00 | 31.00 | 18 | 49 | 1.00 | 0.00 |
| -1.41 | 2800.00 | 1350.00 | 13.00 | 22.00 | 2  | 24 | 0.00 | 0.00 |
| 2.12  | 2800.00 | 313.04  | 64.00 | 73.00 | 23 | 96 | 1.00 | 1.00 |
| -0.32 | 2700.00 | 671.43  | 23.00 | 32.00 | 7  | 39 | 1.00 | 0.00 |
| 0.96  | 3800.00 | 400.00  | 27.00 | 36.00 | 13 | 49 | 1.00 | 1.00 |
| -0.58 | 2400.00 | 651.11  | 12.00 | 21.00 | 9  | 30 | 0.00 | 0.00 |
| -1.35 | 3900.00 | 240.00  | 35.00 | 44.00 | 5  | 49 | 1.00 | 1.00 |
| 0.24  | 2700.00 | 920.00  | 23.00 | 32.00 | 5  | 37 | 1.00 | 0.00 |
| -1.79 | 3100.00 | 1400.00 | 36.00 | 45.00 | 2  | 47 | 1.00 | 1.00 |
| 0.83  | 3300.00 | 928.57  | 25.00 | 34.00 | 7  | 41 | 1.00 | 1.00 |
| 0.06  | 2200.00 | 445.45  | 15.00 | 24.00 | 11 | 35 | 1.00 | 0.00 |
| -1.18 | 3000.00 | 1900.00 | 13.00 | 22.00 | 2  | 24 | 0.00 | 0.00 |
| 0.46  | 3200.00 | 391.67  | 15.00 | 24.00 | 12 | 36 | 1.00 | 0.00 |
| 0.64  | 3800.00 | 900.00  | 26.00 | 35.00 | 9  | 44 | 1.00 | 1.00 |
| -0.03 | 2700.00 | 662.50  | 26.00 | 35.00 | 8  | 43 | 1.00 | 1.00 |
| -0.19 | 2900.00 | 1266.67 | 24.00 | 33.00 | 6  | 39 | 1.00 | 1.00 |
| -1.79 | 2500.00 | 616.67  | 20.00 | 29.00 | 6  | 35 | 1.00 | 0.00 |
| -0.58 | 3100.00 | 550.00  | 23.00 | 32.00 | 8  | 40 | 1.00 | 0.00 |
| 0.86  | 2400.00 | 523.08  | 26.00 | 35.00 | 13 | 48 | 1.00 | 1.00 |
| -1.15 | 3400.00 | 460.00  | 24.00 | 33.00 | 10 | 43 | 1.00 | 1.00 |
| -0.77 | 2400.00 | 866.67  | 12.00 | 21.00 | 3  | 24 | 0.00 | 0.00 |
| 1.28  | 3400.00 | 383.33  | 26.00 | 35.00 | 18 | 53 | 1.00 | 1.00 |
| -0.41 | 2900.00 | 666.67  | 9.00  | 18.00 | 6  | 24 | 0.00 | 0.00 |
| 0.74  | 2700.00 | 644.44  | 23.00 | 32.00 | 9  | 41 | 1.00 | 0.00 |
| -1.21 | 3400.00 | 900.00  | 13.00 | 22.00 | 2  | 24 | 0.00 | 0.00 |
| -0.77 | 3400.00 | 780.00  | 38.00 | 47.00 | 5  | 52 | 1.00 | 1.00 |
| 1.28  | 3100.00 | 323.81  | 34.00 | 43.00 | 21 | 64 | 1.00 | 1.00 |
| 0.78  | 2700.00 | 1028.57 | 14.00 | 23.00 | 7  | 30 | 0.00 | 0.00 |
| 0.67  | 3000.00 | 460.00  | 24.00 | 33.00 | 15 | 48 | 1.00 | 1.00 |
| -1.45 | 3300.00 | 1750.00 | 37.00 | 46.00 | 2  | 48 | 1.00 | 1.00 |
| 0.90  | 3200.00 | 313.64  | 18.00 | 27.00 | 22 | 49 | 1.00 | 0.00 |
| -0.40 | 2700.00 | 1050.00 | 9.00  | 18.00 | 4  | 22 | 0.00 | 0.00 |
| -1.35 | 3000.00 | 975.00  | 10.00 | 19.00 | 4  | 23 | 0.00 | 0.00 |
| 0.88  | 3100.00 | 387.50  | 27.00 | 36.00 | 24 | 60 | 1.00 | 1.00 |
| -1.15 | 2700.00 | 1650.00 | 22.00 | 31.00 | 2  | 33 | 1.00 | 0.00 |
| -1.28 | 2500.00 | 1050.00 | 66.00 | 75.00 | 4  | 79 | 1.00 | 1.00 |
| -1.99 | 2900.00 | 650.00  | 12.00 | 21.00 | 2  | 23 | 0.00 | 0.00 |
| 2.24  | 3000.00 | 379.17  | 59.00 | 68.00 | 24 | 92 | 1.00 | 1.00 |
| -0.86 | 2800.00 | 725.00  | 22.00 | 31.00 | 8  | 39 | 1.00 | 0.00 |
| 0.23  | 3400.00 | 537.50  | 24.00 | 33.00 | 8  | 41 | 1.00 | 1.00 |
| 0.38  | 2100.00 | 338.10  | 35.00 | 44.00 | 21 | 65 | 1.00 | 1.00 |
| -0.90 | 2600.00 | 542.86  | 42.00 | 51.00 | 7  | 58 | 1.00 | 1.00 |
| -0.26 | 2000.00 | 392.31  | 22.00 | 31.00 | 13 | 44 | 1.00 | 0.00 |
| -0.54 | 2500.00 | 575.00  | 38.00 | 47.00 | 8  | 55 | 1.00 | 1.00 |

|       |         |         |       |       |    |    |      |      |
|-------|---------|---------|-------|-------|----|----|------|------|
| 0.96  | 3200.00 | 680.00  | 24.00 | 33.00 | 10 | 43 | 1.00 | 1.00 |
| 0.63  | 2700.00 | 407.69  | 16.00 | 25.00 | 13 | 38 | 1.00 | 0.00 |
| 1.73  | 3200.00 | 581.82  | 24.00 | 33.00 | 11 | 44 | 1.00 | 1.00 |
| 0.09  | 3500.00 | 572.73  | 20.00 | 29.00 | 11 | 40 | 1.00 | 0.00 |
| 0.45  | 2900.00 | 330.77  | 29.00 | 38.00 | 13 | 51 | 1.00 | 1.00 |
| -1.35 | 2500.00 | 866.67  | 11.00 | 20.00 | 3  | 23 | 0.00 | 0.00 |
| -0.06 | 2800.00 | 522.22  | 22.00 | 31.00 | 9  | 40 | 1.00 | 0.00 |
| 0.38  | 3300.00 | 407.14  | 61.00 | 70.00 | 14 | 84 | 1.00 | 1.00 |
| -0.26 | 2600.00 | 880.00  | 10.00 | 19.00 | 5  | 24 | 0.00 | 0.00 |
| -0.14 | 3300.00 | 814.29  | 23.00 | 32.00 | 7  | 39 | 1.00 | 0.00 |
| 0.72  | 3200.00 | 538.46  | 19.00 | 28.00 | 13 | 41 | 1.00 | 0.00 |
| -0.06 | 3200.00 | 500.00  | 17.00 | 26.00 | 10 | 36 | 1.00 | 0.00 |
| 0.58  | 3100.00 | 610.00  | 22.00 | 31.00 | 10 | 41 | 1.00 | 0.00 |
| 1.47  | 2500.00 | 888.89  | 12.00 | 31.00 | 9  | 40 | 1.00 | 0.00 |
| -0.58 | 2500.00 | 1366.67 | 27.00 | 36.00 | 3  | 39 | 1.00 | 1.00 |
| -0.58 | 3300.00 | 700.00  | 34.00 | 43.00 | 7  | 50 | 1.00 | 1.00 |
| -0.71 | 3300.00 | 760.00  | 52.00 | 61.00 | 5  | 66 | 1.00 | 1.00 |
| 0.19  | 3200.00 | 554.55  | 25.00 | 34.00 | 11 | 45 | 1.00 | 1.00 |
| -1.06 | 3000.00 | 720.00  | 10.00 | 19.00 | 5  | 24 | 0.00 | 0.00 |
| -1.35 | 3400.00 | 1333.33 | 61.00 | 70.00 | 3  | 73 | 1.00 | 1.00 |
| 0.56  | 2900.00 | 855.56  | 12.00 | 21.00 | 9  | 30 | 0.00 | 0.00 |
| 1.42  | 3000.00 | 220.00  | 36.00 | 45.00 | 20 | 65 | 1.00 | 1.00 |
| 0.79  | 3300.00 | 344.44  | 21.00 | 30.00 | 18 | 48 | 1.00 | 0.00 |
| -1.33 | 3100.00 | 1500.00 | 13.00 | 22.00 | 2  | 24 | 0.00 | 0.00 |
| -2.12 | 3300.00 | 550.00  | 22.00 | 31.00 | 4  | 35 | 1.00 | 0.00 |
| -0.38 | 2000.00 | 1625.00 | 9.00  | 18.00 | 4  | 22 | 0.00 | 0.00 |
| -0.37 | 3400.00 | 477.78  | 24.00 | 33.00 | 9  | 42 | 1.00 | 1.00 |
| -1.44 | 3200.00 | 766.67  | 52.00 | 61.00 | 3  | 64 | 1.00 | 1.00 |
| 1.63  | 3000.00 | 345.83  | 53.00 | 62.00 | 24 | 86 | 1.00 | 1.00 |
| -1.54 | 3000.00 | 1500.00 | 11.00 | 20.00 | 2  | 22 | 0.00 | 0.00 |
| 1.36  | 2800.00 | 900.00  | 16.00 | 25.00 | 7  | 32 | 1.00 | 0.00 |
| 1.86  | 2300.00 | 325.00  | 46.00 | 55.00 | 24 | 79 | 1.00 | 1.00 |
| 1.60  | 3000.00 | 341.67  | 40.00 | 49.00 | 24 | 73 | 1.00 | 1.00 |
| 0.44  | 2800.00 | 663.64  | 22.00 | 31.00 | 11 | 42 | 1.00 | 0.00 |
| 2.12  | 3000.00 | 425.00  | 27.00 | 36.00 | 24 | 60 | 1.00 | 1.00 |
| 0.85  | 3100.00 | 533.33  | 32.00 | 41.00 | 12 | 53 | 1.00 | 1.00 |
| -0.28 | 2600.00 | 500.00  | 12.00 | 21.00 | 9  | 30 | 0.00 | 0.00 |
| 0.00  | 3100.00 | 353.85  | 44.00 | 53.00 | 13 | 66 | 1.00 | 1.00 |
| -0.94 | 2900.00 | 600.00  | 11.00 | 20.00 | 3  | 23 | 0.00 | 0.00 |
| 0.38  | 2900.00 | 476.19  | 62.00 | 71.00 | 21 | 92 | 1.00 | 1.00 |
| 0.64  | 2800.00 | 944.44  | 22.00 | 31.00 | 9  | 40 | 1.00 | 0.00 |
| -0.13 | 2800.00 | 933.33  | 22.00 | 31.00 | 6  | 37 | 1.00 | 0.00 |
| 2.50  | 3400.00 | 352.17  | 52.00 | 61.00 | 23 | 84 | 1.00 | 1.00 |
| -0.32 | 2500.00 | 825.00  | 11.00 | 20.00 | 4  | 24 | 0.00 | 0.00 |
| -1.45 | 3200.00 | 650.00  | 61.00 | 70.00 | 2  | 72 | 1.00 | 1.00 |
| -0.32 | 2500.00 | 780.00  | 10.00 | 19.00 | 5  | 24 | 0.00 | 0.00 |
| 2.50  | 2800.00 | 486.36  | 41.00 | 50.00 | 22 | 72 | 1.00 | 1.00 |

|       |         |         |       |       |    |    |      |      |
|-------|---------|---------|-------|-------|----|----|------|------|
| 1.35  | 3200.00 | 304.17  | 50.00 | 59.00 | 24 | 83 | 1.00 | 1.00 |
| 0.83  | 2700.00 | 887.50  | 12.00 | 21.00 | 8  | 29 | 0.00 | 0.00 |
| -0.45 | 3100.00 | 628.57  | 23.00 | 32.00 | 7  | 39 | 1.00 | 0.00 |
| -0.26 | 2800.00 | 1525.00 | 9.00  | 18.00 | 4  | 42 | 0.00 | 0.00 |
| 3.09  | 2500.00 | 412.50  | 63.00 | 72.00 | 24 | 96 | 1.00 | 1.00 |
| -0.01 | 2700.00 | 527.27  | 12.00 | 21.00 | 11 | 32 | 0.00 | 0.00 |
| 1.09  | 2700.00 | 507.14  | 59.00 | 68.00 | 14 | 82 | 1.00 | 1.00 |
| 0.19  | 2700.00 | 550.00  | 22.00 | 31.00 | 10 | 41 | 1.00 | 0.00 |
| 1.09  | 3000.00 | 305.00  | 45.00 | 54.00 | 20 | 74 | 1.00 | 1.00 |
| 1.09  | 3000.00 | 512.50  | 24.00 | 33.00 | 8  | 41 | 1.00 | 1.00 |
| 1.09  | 3000.00 | 456.52  | 39.00 | 48.00 | 23 | 71 | 1.00 | 1.00 |
| -0.26 | 2800.00 | 780.00  | 9.00  | 18.00 | 5  | 23 | 0.00 | 0.00 |
| -0.13 | 3500.00 | 622.22  | 24.00 | 33.00 | 9  | 42 | 1.00 | 1.00 |
| -0.28 | 2600.00 | 1120.00 | 66.00 | 75.00 | 5  | 80 | 1.00 | 1.00 |
| -0.85 | 3400.00 | 833.33  | 12.00 | 21.00 | 3  | 24 | 0.00 | 0.00 |
| 1.54  | 3100.00 | 308.33  | 29.00 | 38.00 | 24 | 62 | 1.00 | 1.00 |
| 0.86  | 2500.00 | 690.91  | 10.00 | 19.00 | 11 | 30 | 0.00 | 0.00 |
| -2.17 | 3000.00 | 900.00  | 26.00 | 35.00 | 2  | 37 | 1.00 | 1.00 |
| -0.29 | 3200.00 | 633.33  | 31.00 | 40.00 | 6  | 46 | 1.00 | 1.00 |
| 0.90  | 3000.00 | 1000.00 | 24.00 | 33.00 | 9  | 42 | 1.00 | 1.00 |
| -0.59 | 3200.00 | 1125.00 | 10.00 | 19.00 | 4  | 23 | 0.00 | 0.00 |
| 1.69  | 4000.00 | 325.00  | 39.00 | 48.00 | 24 | 72 | 1.00 | 1.00 |
| 1.41  | 2600.00 | 321.74  | 56.00 | 65.00 | 23 | 88 | 1.00 | 1.00 |
| -0.51 | 2500.00 | 916.67  | 12.00 | 21.00 | 6  | 27 | 0.00 | 0.00 |
| 1.41  | 2800.00 | 461.90  | 32.00 | 41.00 | 21 | 62 | 1.00 | 1.00 |
| -0.19 | 2300.00 | 525.00  | 10.00 | 19.00 | 12 | 31 | 0.00 | 0.00 |
| 0.08  | 2900.00 | 425.00  | 19.00 | 28.00 | 12 | 40 | 1.00 | 0.00 |
| 0.33  | 2500.00 | 445.45  | 16.00 | 25.00 | 11 | 36 | 1.00 | 0.00 |
| -0.15 | 3500.00 | 757.14  | 25.00 | 34.00 | 7  | 41 | 1.00 | 1.00 |
| 2.47  | 3000.00 | 590.48  | 14.00 | 23.00 | 21 | 44 | 0.00 | 0.00 |
| 0.32  | 2700.00 | 438.46  | 22.00 | 31.00 | 13 | 44 | 1.00 | 0.00 |
| -0.12 | 3000.00 | 687.50  | 24.00 | 33.00 | 8  | 41 | 1.00 | 1.00 |
| 1.64  | 4000.00 | 427.78  | 34.00 | 43.00 | 18 | 61 | 1.00 | 1.00 |
| 0.38  | 3200.00 | 588.89  | 25.00 | 34.00 | 9  | 43 | 1.00 | 1.00 |
| -0.35 | 2800.00 | 800.00  | 11.00 | 20.00 | 4  | 24 | 0.00 | 0.00 |
| -1.21 | 2900.00 | 1266.67 | 35.00 | 44.00 | 3  | 47 | 1.00 | 1.00 |
| -1.50 | 2400.00 | 1266.67 | 31.00 | 40.00 | 3  | 43 | 1.00 | 1.00 |
| 1.09  | 2200.00 | 566.67  | 12.00 | 21.00 | 12 | 33 | 0.00 | 0.00 |
| 0.72  | 3000.00 | 533.33  | 45.00 | 54.00 | 18 | 72 | 1.00 | 1.00 |
| -1.53 | 2800.00 | 750.00  | 18.00 | 27.00 | 4  | 31 | 1.00 | 0.00 |
| -1.58 | 3500.00 | 900.00  | 38.00 | 47.00 | 2  | 49 | 1.00 | 1.00 |
| -0.85 | 2700.00 | 616.67  | 9.00  | 18.00 | 6  | 24 | 0.00 | 0.00 |
| -1.08 | 2800.00 | 1433.33 | 14.00 | 23.00 | 3  | 26 | 0.00 | 0.00 |
| 0.26  | 3000.00 | 571.43  | 24.00 | 33.00 | 7  | 30 | 1.00 | 1.00 |
| -2.12 | 2700.00 | 966.67  | 11.00 | 20.00 | 3  | 23 | 0.00 | 0.00 |
| -1.22 | 3000.00 | 1233.33 | 10.00 | 19.00 | 3  | 22 | 0.00 | 0.00 |
| -0.38 | 3200.00 | 400.00  | 45.00 | 54.00 | 8  | 62 | 1.00 | 1.00 |

|       |         |         |       |       |    |    |      |      |
|-------|---------|---------|-------|-------|----|----|------|------|
| -0.45 | 3300.00 | 875.00  | 9.00  | 18.00 | 4  | 22 | 0.00 | 0.00 |
| -2.18 | 2400.00 | 1075.00 | 23.00 | 32.00 | 4  | 36 | 1.00 | 0.00 |
| -1.41 | 3100.00 | 280.00  | 24.00 | 33.00 | 5  | 38 | 1.00 | 1.00 |
| -2.17 | 3300.00 | 433.33  | 41.00 | 50.00 | 3  | 53 | 1.00 | 1.00 |
| 0.33  | 3300.00 | 375.00  | 24.00 | 33.00 | 12 | 45 | 1.00 | 1.00 |
| 1.26  | 3000.00 | 333.33  | 27.00 | 36.00 | 18 | 54 | 1.00 | 1.00 |
| -0.04 | 2100.00 | 611.11  | 10.00 | 19.00 | 9  | 38 | 0.00 | 0.00 |
| -0.32 | 2700.00 | 511.11  | 37.00 | 46.00 | 9  | 55 | 1.00 | 1.00 |
| -0.13 | 3000.00 | 1240.00 | 24.00 | 33.00 | 5  | 38 | 1.00 | 1.00 |
| -0.38 | 2500.00 | 800.00  | 45.00 | 54.00 | 8  | 62 | 1.00 | 1.00 |
| -1.44 | 3200.00 | 1050.00 | 52.00 | 61.00 | 2  | 63 | 1.00 | 1.00 |
| -1.54 | 2800.00 | 1233.33 | 11.00 | 20.00 | 3  | 23 | 0.00 | 0.00 |
| -0.29 | 3000.00 | 1100.00 | 12.00 | 21.00 | 3  | 24 | 0.00 | 0.00 |
| -0.38 | 3400.00 | 840.00  | 37.00 | 46.00 | 5  | 51 | 1.00 | 1.00 |

| BTP  | BTB  | Agediff | BTB2 | Wt       | Wtdifferen | Growth  | BTB3 |
|------|------|---------|------|----------|------------|---------|------|
| 3.00 | 3.00 | 47.00   | 1.00 | 12900.00 | 9400.00    | 447.62  | 3.00 |
| 1.00 | 2.00 | 31.00   | 0.00 | 9100.00  | 6200.00    | 563.64  | 2.00 |
| 1.00 | 2.00 | 29.00   | 0.00 | 10400.00 | 6800.00    | 523.08  | 2.00 |
| 1.00 | 2.00 | 32.00   | 0.00 | 7500.00  | 4600.00    | 575.00  | 2.00 |
| 3.00 | 4.00 | 61.00   | 1.00 | 5200.00  | 2000.00    | 1000.00 | 3.00 |
| 3.00 | 3.00 | 46.00   | 1.00 | 8900.00  | 5900.00    | 983.33  | 3.00 |
| 1.00 | 1.00 | 13.00   | 0.00 | 8900.00  | 5400.00    | 450.00  | 1.00 |
| 1.00 | 1.00 | 12.00   | 0.00 | 8200.00  | 4900.00    | 376.92  | 1.00 |
| 4.00 | 4.00 | 72.00   | 1.00 | 7400.00  | 3900.00    | 975.00  | 3.00 |
| 2.00 | 2.00 | 34.00   | 0.00 | 7200.00  | 3800.00    | 542.86  | 2.00 |
| 1.00 | 1.00 | 23.00   | 0.00 | 7100.00  | 4700.00    | 1175.00 | 1.00 |
| 2.00 | 3.00 | 38.00   | 1.00 | 8300.00  | 4700.00    | 1175.00 | 3.00 |
| 1.00 | 1.00 | 19.00   | 0.00 | 7400.00  | 4800.00    | 960.00  | 1.00 |
| 1.00 | 1.00 | 21.00   | 0.00 | 6900.00  | 4400.00    | 550.00  | 1.00 |
| 4.00 | 4.00 | 95.00   | 1.00 | 4100.00  | 2000.00    | 666.67  | 3.00 |
| 1.00 | 1.00 | 23.00   | 0.00 | 6200.00  | 3700.00    | 740.00  | 1.00 |
| 2.00 | 3.00 | 37.00   | 1.00 | 8200.00  | 5600.00    | 933.33  | 3.00 |
| 2.00 | 2.00 | 35.00   | 0.00 | 6600.00  | 2600.00    | 236.36  | 2.00 |
| 1.00 | 1.00 | 21.00   | 0.00 | 6700.00  | 4000.00    | 1333.33 | 1.00 |
| 4.00 | 4.00 | 84.00   | 1.00 | 6700.00  | 3700.00    | 1233.33 | 3.00 |
| 4.00 | 4.00 | 76.00   | 1.00 | 7300.00  | 4600.00    | 920.00  | 3.00 |
| 1.00 | 1.00 | 19.00   | 0.00 | 7500.00  | 4700.00    | 587.50  | 1.00 |
| 3.00 | 4.00 | 64.00   | 1.00 | 9700.00  | 6900.00    | 862.50  | 3.00 |
| 1.00 | 2.00 | 32.00   | 0.00 | 8900.00  | 6000.00    | 500.00  | 2.00 |
| 3.00 | 3.00 | 53.00   | 1.00 | 9300.00  | 6800.00    | 357.89  | 3.00 |
| 4.00 | 4.00 | 80.00   | 1.00 | 7300.00  | 4300.00    | 614.29  | 3.00 |
| 2.00 | 3.00 | 44.00   | 1.00 | 7300.00  | 4000.00    | 1000.00 | 3.00 |
| 2.00 | 2.00 | 35.00   | 0.00 | 9000.00  | 5800.00    | 644.44  | 2.00 |
| 4.00 | 4.00 | 83.00   | 1.00 | 10500.00 | 7000.00    | 538.46  | 3.00 |
| 2.00 | 2.00 | 34.00   | 0.00 | 9700.00  | 6600.00    | 825.00  | 2.00 |
| 1.00 | 2.00 | 32.00   | 0.00 | 7700.00  | 4800.00    | 600.00  | 2.00 |
| 1.00 | 2.00 | 25.00   | 0.00 | 8200.00  | 5500.00    | 785.71  | 2.00 |
| 3.00 | 4.00 | 61.00   | 1.00 | 9400.00  | 6700.00    | 609.09  | 3.00 |
| 1.00 | 2.00 | 28.00   | 0.00 | 8000.00  | 5600.00    | 509.09  | 2.00 |
| 1.00 | 2.00 | 31.00   | 0.00 | 9300.00  | 6400.00    | 581.82  | 2.00 |
| 1.00 | 2.00 | 32.00   | 0.00 | 9200.00  | 6400.00    | 1066.67 | 2.00 |
| 1.00 | 2.00 | 25.00   | 0.00 | 13500.00 | 10900.00   | 545.00  | 2.00 |
| 1.00 | 1.00 | 21.00   | 0.00 | 10900.00 | 8400.00    | 466.67  | 1.00 |
| 1.00 | 2.00 | 31.00   | 0.00 | 7500.00  | 4500.00    | 409.09  | 2.00 |
| 1.00 | 1.00 | 21.00   | 0.00 | 8000.00  | 5400.00    | 540.00  | 1.00 |
| 3.00 | 3.00 | 47.00   | 1.00 | 12000.00 | 9100.00    | 379.17  | 3.00 |
| 1.00 | 2.00 | 30.00   | 0.00 | 9500.00  | 7200.00    | 600.00  | 2.00 |
| 1.00 | 2.00 | 30.00   | 0.00 | 9300.00  | 7600.00    | 633.33  | 2.00 |
| 3.00 | 3.00 | 49.00   | 1.00 | 9900.00  | 6700.00    | 291.30  | 3.00 |
| 2.00 | 3.00 | 40.00   | 1.00 | 12000.00 | 9200.00    | 383.33  | 3.00 |
| 2.00 | 2.00 | 35.00   | 0.00 | 12000.00 | 8900.00    | 684.62  | 2.00 |

|      |      |       |      |          |          |         |      |
|------|------|-------|------|----------|----------|---------|------|
| 1.00 | 1.00 | 21.00 | 0.00 | 13100.00 | 10300.00 | 429.17  | 1.00 |
| 2.00 | 1.00 | 15.00 | 0.00 | 7400.00  | 4000.00  | 571.43  | 1.00 |
| 3.00 | 3.00 | 51.00 | 1.00 | 5500.00  | 2900.00  | 580.00  | 3.00 |
| 3.00 | 4.00 | 66.00 | 1.00 | 6900.00  | 4000.00  | 666.67  | 3.00 |
| 1.00 | 2.00 | 30.00 | 0.00 | 6200.00  | 3400.00  | 566.67  | 2.00 |
| 3.00 | 4.00 | 60.00 | 1.00 | 6800.00  | 3800.00  | 1266.67 | 3.00 |
| 1.00 | 2.00 | 30.00 | 0.00 | 7000.00  | 4400.00  | 400.00  | 2.00 |
| 1.00 | 2.00 | 30.00 | 0.00 | 10000.00 | 7300.00  | 384.21  | 2.00 |
| 3.00 | 3.00 | 48.00 | 1.00 | 10000.00 | 6850.00  | 285.42  | 3.00 |
| 1.00 | 1.00 | 19.00 | 0.00 | 9500.00  | 6100.00  | 1220.00 | 1.00 |
| 1.00 | 2.00 | 30.00 | 0.00 | 9500.00  | 6800.00  | 680.00  | 2.00 |
| 1.00 | 2.00 | 30.00 | 0.00 | 8500.00  | 4600.00  | 328.57  | 2.00 |
| 3.00 | 3.00 | 46.00 | 1.00 | 4500.00  | 1900.00  | 950.00  | 3.00 |
| 1.00 | 2.00 | 29.00 | 0.00 | 10300.00 | 7200.00  | 360.00  | 2.00 |
| 1.00 | 2.00 | 30.00 | 0.00 | 6500.00  | 4200.00  | 1050.00 | 2.00 |
| 1.00 | 2.00 | 29.00 | 0.00 | 12000.00 | 9200.00  | 383.33  | 2.00 |
| 1.00 | 1.00 | 18.00 | 0.00 | 5500.00  | 2600.00  | 1300.00 | 1.00 |
| 1.00 | 1.00 | 23.00 | 0.00 | 9000.00  | 6300.00  | 484.62  | 1.00 |
| 3.00 | 3.00 | 45.00 | 1.00 | 10000.00 | 7200.00  | 342.86  | 3.00 |
| 1.00 | 1.00 | 23.00 | 0.00 | 6500.00  | 4100.00  | 683.33  | 1.00 |
| 1.00 | 2.00 | 30.00 | 0.00 | 6000.00  | 2300.00  | 460.00  | 2.00 |
| 1.00 | 2.00 | 30.00 | 0.00 | 10600.00 | 7900.00  | 359.09  | 2.00 |
| 1.00 | 2.00 | 31.00 | 0.00 | 10200.00 | 7700.00  | 770.00  | 2.00 |
| 2.00 | 2.00 | 35.00 | 0.00 | 6600.00  | 3600.00  | 720.00  | 2.00 |
| 1.00 | 2.00 | 30.00 | 0.00 | 9000.00  | 5800.00  | 483.33  | 2.00 |
| 1.00 | 2.00 | 31.00 | 0.00 | 7400.00  | 4300.00  | 614.29  | 2.00 |
| 1.00 | 2.00 | 27.00 | 0.00 | 7000.00  | 3700.00  | 462.50  | 2.00 |
| 1.00 | 1.00 | 20.00 | 0.00 | 7400.00  | 4800.00  | 436.36  | 1.00 |
| 1.00 | 1.00 | 20.00 | 0.00 | 7100.00  | 4100.00  | 1025.00 | 1.00 |
| 2.00 | 2.00 | 33.00 | 0.00 | 10700.00 | 8100.00  | 540.00  | 2.00 |
| 1.00 | 2.00 | 31.00 | 0.00 | 10100.00 | 7100.00  | 1183.33 | 2.00 |
| 1.00 | 1.00 | 18.00 | 0.00 | 8600.00  | 5300.00  | 294.44  | 1.00 |
| 1.00 | 1.00 | 18.00 | 0.00 | 6000.00  | 3300.00  | 1100.00 | 1.00 |
| 3.00 | 3.00 | 57.00 | 1.00 | 8800.00  | 5700.00  | 518.18  | 3.00 |
| 3.00 | 3.00 | 55.00 | 1.00 | 9500.00  | 6800.00  | 400.00  | 3.00 |
| 1.00 | 2.00 | 30.00 | 0.00 | 8300.00  | 5500.00  | 500.00  | 2.00 |
| 1.00 | 2.00 | 31.00 | 0.00 | 9300.00  | 6300.00  | 630.00  | 2.00 |
| 3.00 | 3.00 | 46.00 | 1.00 | 8400.00  | 5500.00  | 366.67  | 3.00 |
| 1.00 | 2.00 | 31.00 | 0.00 | 8000.00  | 5600.00  | 800.00  | 2.00 |
| 1.00 | 2.00 | 25.00 | 0.00 | 13000.00 | 9900.00  | 412.50  | 2.00 |
| 2.00 | 3.00 | 36.00 | 1.00 | 8000.00  | 4800.00  | 252.63  | 3.00 |
| 1.00 | 2.00 | 30.00 | 0.00 | 7300.00  | 4900.00  | 350.00  | 2.00 |
| 2.00 | 2.00 | 33.00 | 0.00 | 7700.00  | 4300.00  | 860.00  | 2.00 |
| 1.00 | 2.00 | 30.00 | 0.00 | 8000.00  | 5100.00  | 425.00  | 2.00 |
| 3.00 | 4.00 | 61.00 | 1.00 | 8200.00  | 5600.00  | 509.09  | 3.00 |
| 1.00 | 1.00 | 21.00 | 0.00 | 5100.00  | 2000.00  | 666.67  | 1.00 |
| 1.00 | 2.00 | 29.00 | 0.00 | 6400.00  | 3500.00  | 700.00  | 2.00 |

|      |      |       |      |          |          |         |      |
|------|------|-------|------|----------|----------|---------|------|
| 2.00 | 2.00 | 34.00 | 0.00 | 9000.00  | 6100.00  | 265.22  | 2.00 |
| 1.00 | 2.00 | 31.00 | 0.00 | 8000.00  | 4400.00  | 550.00  | 2.00 |
| 2.00 | 3.00 | 43.00 | 1.00 | 5900.00  | 3000.00  | 600.00  | 3.00 |
| 1.00 | 2.00 | 31.00 | 0.00 | 6700.00  | 4200.00  | 1400.00 | 2.00 |
| 1.00 | 2.00 | 31.00 | 0.00 | 8700.00  | 6200.00  | 364.71  | 2.00 |
| 1.00 | 2.00 | 31.00 | 0.00 | 6000.00  | 3200.00  | 533.33  | 2.00 |
| 3.00 | 3.00 | 48.00 | 1.00 | 8300.00  | 5500.00  | 458.33  | 3.00 |
| 1.00 | 2.00 | 31.00 | 0.00 | 8300.00  | 5700.00  | 1425.00 | 2.00 |
| 3.00 | 3.00 | 57.00 | 1.00 | 7500.00  | 4200.00  | 420.00  | 3.00 |
| 1.00 | 2.00 | 31.00 | 0.00 | 8200.00  | 5600.00  | 466.67  | 2.00 |
| 2.00 | 3.00 | 39.00 | 1.00 | 7800.00  | 4800.00  | 533.33  | 3.00 |
| 1.00 | 2.00 | 32.00 | 0.00 | 7800.00  | 4800.00  | 1600.00 | 2.00 |
| 3.00 | 3.00 | 53.00 | 1.00 | 9600.00  | 6300.00  | 331.58  | 3.00 |
| 2.00 | 3.00 | 38.00 | 1.00 | 8400.00  | 5400.00  | 675.00  | 3.00 |
| 3.00 | 3.00 | 48.00 | 1.00 | 14000.00 | 10900.00 | 454.17  | 3.00 |
| 1.00 | 2.00 | 30.00 | 0.00 | 6900.00  | 4000.00  | 1000.00 | 2.00 |
| 1.00 | 1.00 | 20.00 | 0.00 | 5500.00  | 2600.00  | 650.00  | 1.00 |
| 1.00 | 2.00 | 27.00 | 0.00 | 6800.00  | 3500.00  | 875.00  | 2.00 |
| 2.00 | 3.00 | 44.00 | 1.00 | 9000.00  | 6300.00  | 393.75  | 3.00 |
| 1.00 | 2.00 | 31.00 | 0.00 | 5300.00  | 2600.00  | 866.67  | 2.00 |
| 1.00 | 2.00 | 27.00 | 0.00 | 11400.00 | 9500.00  | 475.00  | 2.00 |
| 2.00 | 3.00 | 38.00 | 1.00 | 9300.00  | 6700.00  | 279.17  | 3.00 |
| 1.00 | 1.00 | 19.00 | 0.00 | 5200.00  | 2000.00  | 666.67  | 1.00 |
| 2.00 | 3.00 | 36.00 | 1.00 | 12100.00 | 9200.00  | 400.00  | 3.00 |
| 2.00 | 3.00 | 42.00 | 1.00 | 10000.00 | 7400.00  | 321.74  | 3.00 |
| 1.00 | 1.00 | 19.00 | 0.00 | 6400.00  | 3300.00  | 660.00  | 1.00 |
| 1.00 | 2.00 | 29.00 | 0.00 | 6100.00  | 3800.00  | 760.00  | 2.00 |
| 1.00 | 2.00 | 25.00 | 0.00 | 9700.00  | 6000.00  | 545.45  | 2.00 |
| 1.00 | 1.00 | 18.00 | 0.00 | 6100.00  | 2800.00  | 700.00  | 1.00 |
| 2.00 | 3.00 | 41.00 | 1.00 | 9500.00  | 7000.00  | 368.42  | 3.00 |
| 1.00 | 1.00 | 23.00 | 0.00 | 9000.00  | 6400.00  | 914.29  | 1.00 |
| 1.00 | 1.00 | 20.00 | 0.00 | 6000.00  | 3000.00  | 1000.00 | 1.00 |
| 2.00 | 3.00 | 38.00 | 1.00 | 4800.00  | 1800.00  | 900.00  | 3.00 |
| 1.00 | 1.00 | 19.00 | 0.00 | 7800.00  | 4500.00  | 900.00  | 1.00 |
| 3.00 | 4.00 | 68.00 | 1.00 | 10100.00 | 6800.00  | 357.89  | 3.00 |
| 1.00 | 1.00 | 21.00 | 0.00 | 6800.00  | 3800.00  | 633.33  | 1.00 |
| 1.00 | 1.00 | 21.00 | 0.00 | 6000.00  | 2800.00  | 1400.00 | 1.00 |
| 2.00 | 3.00 | 40.00 | 1.00 | 9400.00  | 7000.00  | 411.76  | 3.00 |
| 1.00 | 1.00 | 20.00 | 0.00 | 6900.00  | 3900.00  | 487.50  | 1.00 |
| 1.00 | 2.00 | 32.00 | 0.00 | 8000.00  | 5300.00  | 331.25  | 2.00 |
| 1.00 | 1.00 | 23.00 | 0.00 | 7200.00  | 4000.00  | 666.67  | 1.00 |
| 2.00 | 3.00 | 38.00 | 1.00 | 10000.00 | 7000.00  | 700.00  | 3.00 |
| 1.00 | 1.00 | 21.00 | 0.00 | 7900.00  | 4500.00  | 1500.00 | 1.00 |
| 1.00 | 2.00 | 30.00 | 0.00 | 7500.00  | 4600.00  | 418.18  | 2.00 |
| 1.00 | 2.00 | 32.00 | 0.00 | 7000.00  | 4200.00  | 600.00  | 2.00 |
| 1.00 | 1.00 | 21.00 | 0.00 | 6400.00  | 3800.00  | 475.00  | 1.00 |
| 1.00 | 2.00 | 30.00 | 0.00 | 5400.00  | 2700.00  | 450.00  | 2.00 |

|      |      |        |      |          |          |         |      |
|------|------|--------|------|----------|----------|---------|------|
| 3.00 | 4.00 | 61.00  | 1.00 | 11600.00 | 8400.00  | 381.82  | 3.00 |
| 1.00 | 1.00 | 21.00  | 0.00 | 7400.00  | 5000.00  | 833.33  | 1.00 |
| 1.00 | 2.00 | 26.00  | 0.00 | 10300.00 | 7000.00  | 368.42  | 2.00 |
| 1.00 | 2.00 | 32.00  | 0.00 | 6000.00  | 3000.00  | 750.00  | 2.00 |
| 3.00 | 3.00 | 46.00  | 1.00 | 5200.00  | 2300.00  | 1150.00 | 3.00 |
| 1.00 | 1.00 | 21.00  | 0.00 | 8400.00  | 5400.00  | 675.00  | 1.00 |
| 1.00 | 1.00 | 19.00  | 0.00 | 7000.00  | 3500.00  | 700.00  | 1.00 |
| 2.00 | 3.00 | 41.00  | 1.00 | 8700.00  | 5700.00  | 814.29  | 3.00 |
| 1.00 | 1.00 | 19.00  | 0.00 | 9000.00  | 6100.00  | 677.78  | 1.00 |
| 1.00 | 1.00 | 118.00 | 0.00 | 8700.00  | 6100.00  | 435.71  | 1.00 |
| 1.00 | 1.00 | 19.00  | 0.00 | 8000.00  | 5000.00  | 1000.00 | 1.00 |
| 3.00 | 3.00 | 46.00  | 1.00 | 4600.00  | 1200.00  | 600.00  | 3.00 |
| 1.00 | 2.00 | 29.00  | 0.00 | 10900.00 | 7600.00  | 380.00  | 2.00 |
| 1.00 | 1.00 | 19.00  | 0.00 | 10000.00 | 6400.00  | 640.00  | 1.00 |
| 3.00 | 3.00 | 49.00  | 1.00 | 9300.00  | 6500.00  | 382.35  | 3.00 |
| 1.00 | 1.00 | 19.00  | 0.00 | 9000.00  | 6000.00  | 666.67  | 1.00 |
| 1.00 | 2.00 | 30.00  | 0.00 | 8900.00  | 6300.00  | 262.50  | 2.00 |
| 1.00 | 1.00 | 19.00  | 0.00 | 9600.00  | 6600.00  | 733.33  | 1.00 |
| 4.00 | 4.00 | 79.00  | 1.00 | 8300.00  | 5700.00  | 335.29  | 3.00 |
| 1.00 | 1.00 | 21.00  | 0.00 | 9000.00  | 5000.00  | 714.29  | 1.00 |
| 1.00 | 2.00 | 32.00  | 0.00 | 8900.00  | 5900.00  | 368.75  | 2.00 |
| 1.00 | 1.00 | 21.00  | 0.00 | 7800.00  | 5100.00  | 1275.00 | 1.00 |
| 1.00 | 1.00 | 23.00  | 0.00 | 6400.00  | 3000.00  | 428.57  | 1.00 |
| 2.00 | 3.00 | 37.00  | 1.00 | 9100.00  | 6300.00  | 273.91  | 3.00 |
| 3.00 | 3.00 | 48.00  | 1.00 | 10000.00 | 6500.00  | 270.83  | 3.00 |
| 1.00 | 1.00 | 21.00  | 0.00 | 7200.00  | 3800.00  | 422.22  | 1.00 |
| 4.00 | 4.00 | 70.00  | 1.00 | 14500.00 | 11700.00 | 1063.64 | 3.00 |
| 1.00 | 1.00 | 20.00  | 0.00 | 8500.00  | 5600.00  | 700.00  | 1.00 |
| 3.00 | 3.00 | 45.00  | 1.00 | 7600.00  | 4600.00  | 766.67  | 3.00 |
| 1.00 | 1.00 | 19.00  | 0.00 | 7900.00  | 5000.00  | 714.29  | 1.00 |
| 2.00 | 2.00 | 35.00  | 0.00 | 10200.00 | 6000.00  | 315.79  | 2.00 |
| 1.00 | 1.00 | 20.00  | 0.00 | 6000.00  | 3500.00  | 875.00  | 1.00 |
| 2.00 | 3.00 | 36.00  | 1.00 | 8400.00  | 5900.00  | 453.85  | 3.00 |
| 3.00 | 3.00 | 54.00  | 1.00 | 10500.00 | 7600.00  | 330.43  | 3.00 |
| 1.00 | 1.00 | 19.00  | 0.00 | 8000.00  | 4800.00  | 685.71  | 1.00 |
| 1.00 | 1.00 | 19.00  | 0.00 | 5000.00  | 2000.00  | 1000.00 | 1.00 |
| 1.00 | 2.00 | 21.00  | 0.00 | 8800.00  | 6000.00  | 2000.00 | 2.00 |
| 1.00 | 1.00 | 19.00  | 0.00 | 8600.00  | 6100.00  | 358.82  | 1.00 |
| 1.00 | 2.00 | 31.00  | 0.00 | 6200.00  | 3700.00  | 411.11  | 2.00 |
| 2.00 | 3.00 | 36.00  | 1.00 | 8400.00  | 5400.00  | 600.00  | 3.00 |
| 1.00 | 2.00 | 25.00  | 0.00 | 7500.00  | 4900.00  | 816.67  | 2.00 |
| 1.00 | 2.00 | 27.00  | 0.00 | 9600.00  | 5800.00  | 446.15  | 2.00 |
| 1.00 | 2.00 | 30.00  | 0.00 | 8900.00  | 6000.00  | 750.00  | 2.00 |
| 1.00 | 1.00 | 18.00  | 0.00 | 7000.00  | 4200.00  | 700.00  | 1.00 |
| 3.00 | 4.00 | 61.00  | 1.00 | 11200.00 | 8100.00  | 352.17  | 3.00 |
| 1.00 | 2.00 | 29.00  | 0.00 | 8500.00  | 5800.00  | 644.44  | 2.00 |
| 1.00 | 1.00 | 19.00  | 0.00 | 8500.00  | 5100.00  | 728.57  | 1.00 |



|      |      |       |      |          |         |         |      |
|------|------|-------|------|----------|---------|---------|------|
| 1.00 | 2.00 | 25.00 | 0.00 | 9000.00  | 6100.00 | 265.22  | 2.00 |
| 1.00 | 1.00 | 23.00 | 0.00 | 7900.00  | 4900.00 | 816.67  | 1.00 |
| 1.00 | 2.00 | 30.00 | 0.00 | 10600.00 | 8100.00 | 736.36  | 2.00 |
| 1.00 | 2.00 | 31.00 | 0.00 | 8600.00  | 5500.00 | 611.11  | 2.00 |
| 3.00 | 3.00 | 46.00 | 1.00 | 7500.00  | 5400.00 | 600.00  | 3.00 |
| 1.00 | 1.00 | 23.00 | 0.00 | 7500.00  | 4600.00 | 575.00  | 1.00 |
| 1.00 | 2.00 | 30.00 | 0.00 | 7900.00  | 5000.00 | 454.55  | 2.00 |
| 2.00 | 3.00 | 40.00 | 1.00 | 8400.00  | 5000.00 | 625.00  | 3.00 |
| 3.00 | 3.00 | 46.00 | 1.00 | 7600.00  | 4200.00 | 840.00  | 3.00 |
| 1.00 | 1.00 | 19.00 | 0.00 | 6300.00  | 3760.00 | 470.00  | 1.00 |
| 3.00 | 3.00 | 54.00 | 1.00 | 8300.00  | 6000.00 | 400.00  | 3.00 |
| 1.00 | 1.00 | 18.00 | 0.00 | 7010.00  | 4710.00 | 588.75  | 1.00 |
| 2.00 | 3.00 | 41.00 | 1.00 | 7400.00  | 4900.00 | 408.33  | 3.00 |
| 1.00 | 1.00 | 19.00 | 0.00 | 7800.00  | 4900.00 | 612.50  | 1.00 |
| 1.00 | 2.00 | 28.00 | 0.00 | 8500.00  | 6000.00 | 600.00  | 2.00 |
| 2.00 | 3.00 | 41.00 | 1.00 | 10600.00 | 7300.00 | 663.64  | 3.00 |
| 2.00 | 2.00 | 33.00 | 0.00 | 10400.00 | 7400.00 | 1233.33 | 2.00 |
| 2.00 | 3.00 | 36.00 | 1.00 | 5000.00  | 1100.00 | 275.00  | 3.00 |
| 2.00 | 3.00 | 36.00 | 1.00 | 6000.00  | 2750.00 | 550.00  | 3.00 |
| 2.00 | 2.00 | 35.00 | 0.00 | 12700.00 | 9800.00 | 408.33  | 2.00 |
| 3.00 | 3.00 | 59.00 | 1.00 | 10500.00 | 7300.00 | 304.17  | 3.00 |
| 2.00 | 2.00 | 33.00 | 0.00 | 8000.00  | 4800.00 | 685.71  | 2.00 |
| 3.00 | 3.00 | 48.00 | 1.00 | 12500.00 | 9100.00 | 379.17  | 3.00 |
| 1.00 | 1.00 | 20.00 | 0.00 | 5000.00  | 1880.00 | 626.67  | 1.00 |
| 1.00 | 2.00 | 28.00 | 0.00 | 8700.00  | 5800.00 | 828.57  | 2.00 |
| 1.00 | 2.00 | 30.00 | 0.00 | 6800.00  | 3800.00 | 633.33  | 2.00 |
| 1.00 | 1.00 | 19.00 | 0.00 | 5400.00  | 3400.00 | 850.00  | 1.00 |
| 2.00 | 3.00 | 38.00 | 1.00 | 5600.00  | 2400.00 | 800.00  | 3.00 |
| 1.00 | 1.00 | 19.00 | 0.00 | 7800.00  | 5000.00 | 625.00  | 1.00 |
| 3.00 | 4.00 | 60.00 | 1.00 | 10200.00 | 6800.00 | 283.33  | 3.00 |
| 1.00 | 1.00 | 19.00 | 0.00 | 8700.00  | 5700.00 | 633.33  | 1.00 |
| 3.00 | 3.00 | 52.00 | 1.00 | 4800.00  | 1300.00 | 650.00  | 3.00 |
| 1.00 | 1.00 | 21.00 | 0.00 | 5400.00  | 2600.00 | 650.00  | 1.00 |
| 1.00 | 1.00 | 21.00 | 0.00 | 9000.00  | 6100.00 | 1525.00 | 1.00 |
| 3.00 | 4.00 | 64.00 | 1.00 | 8800.00  | 5800.00 | 290.00  | 3.00 |
| 1.00 | 1.00 | 19.00 | 0.00 | 5700.00  | 3400.00 | 850.00  | 1.00 |
| 3.00 | 4.00 | 68.00 | 1.00 | 6100.00  | 3500.00 | 1750.00 | 3.00 |
| 4.00 | 4.00 | 92.00 | 1.00 | 7800.00  | 4700.00 | 671.43  | 3.00 |
| 1.00 | 1.00 | 18.00 | 0.00 | 8000.00  | 4200.00 | 700.00  | 1.00 |
| 1.00 | 2.00 | 30.00 | 0.00 | 8500.00  | 6100.00 | 508.33  | 2.00 |
| 2.00 | 3.00 | 39.00 | 1.00 | 10600.00 | 8100.00 | 578.57  | 3.00 |
| 1.00 | 2.00 | 31.00 | 0.00 | 5600.00  | 2400.00 | 342.86  | 2.00 |
| 1.00 | 2.00 | 31.00 | 0.00 | 10000.00 | 6800.00 | 680.00  | 2.00 |
| 2.00 | 2.00 | 35.00 | 0.00 | 12300.00 | 9500.00 | 395.83  | 2.00 |
| 1.00 | 1.00 | 18.00 | 0.00 | 8200.00  | 5500.00 | 423.08  | 1.00 |
| 3.00 | 3.00 | 48.00 | 1.00 | 6800.00  | 4100.00 | 1366.67 | 3.00 |
| 3.00 | 3.00 | 54.00 | 1.00 | 7000.00  | 3800.00 | 760.00  | 3.00 |

|      |      |       |      |          |         |         |      |
|------|------|-------|------|----------|---------|---------|------|
| 1.00 | 1.00 | 19.00 | 0.00 | 6900.00  | 4200.00 | 840.00  | 1.00 |
| 1.00 | 1.00 | 18.00 | 0.00 | 6900.00  | 3800.00 | 760.00  | 1.00 |
| 1.00 | 1.00 | 19.00 | 0.00 | 6800.00  | 3900.00 | 650.00  | 1.00 |
| 4.00 | 4.00 | 76.00 | 1.00 | 8400.00  | 6400.00 | 320.00  | 3.00 |
| 1.00 | 2.00 | 31.00 | 0.00 | 6800.00  | 4000.00 | 800.00  | 2.00 |
| 2.00 | 3.00 | 38.00 | 1.00 | 7110.00  | 4010.00 | 1002.50 | 3.00 |
| 2.00 | 3.00 | 41.00 | 1.00 | 9100.00  | 6200.00 | 688.89  | 3.00 |
| 1.00 | 2.00 | 27.00 | 0.00 | 7600.00  | 5300.00 | 530.00  | 2.00 |
| 2.00 | 3.00 | 36.00 | 1.00 | 7500.00  | 4600.00 | 383.33  | 3.00 |
| 1.00 | 1.00 | 21.00 | 0.00 | 9500.00  | 6500.00 | 541.67  | 1.00 |
| 4.00 | 4.00 | 69.00 | 1.00 | 8800.00  | 5900.00 | 393.33  | 3.00 |
| 1.00 | 2.00 | 31.00 | 0.00 | 9400.00  | 6100.00 | 610.00  | 2.00 |
| 3.00 | 3.00 | 51.00 | 1.00 | 5000.00  | 2400.00 | 800.00  | 3.00 |
| 1.00 | 1.00 | 21.00 | 0.00 | 9000.00  | 5800.00 | 644.44  | 1.00 |
| 1.00 | 2.00 | 30.00 | 0.00 | 9200.00  | 5900.00 | 453.85  | 2.00 |
| 3.00 | 3.00 | 46.00 | 1.00 | 6200.00  | 2800.00 | 1400.00 | 3.00 |
| 1.00 | 1.00 | 21.00 | 0.00 | 10600.00 | 7600.00 | 844.44  | 1.00 |
| 3.00 | 3.00 | 51.00 | 1.00 | 8900.00  | 6500.00 | 309.52  | 3.00 |
| 1.00 | 1.00 | 19.00 | 0.00 | 7700.00  | 4600.00 | 418.18  | 1.00 |
| 2.00 | 2.00 | 35.00 | 0.00 | 10500.00 | 7500.00 | 576.92  | 2.00 |
| 1.00 | 1.00 | 18.00 | 0.00 | 8200.00  | 5300.00 | 883.33  | 1.00 |
| 1.00 | 1.00 | 23.00 | 0.00 | 10100.00 | 6600.00 | 942.86  | 1.00 |
| 1.00 | 1.00 | 21.00 | 0.00 | 7900.00  | 5500.00 | 366.67  | 1.00 |
| 3.00 | 3.00 | 52.00 | 1.00 | 6700.00  | 3700.00 | 462.50  | 3.00 |
| 1.00 | 1.00 | 19.00 | 0.00 | 7510.00  | 5310.00 | 663.75  | 1.00 |
| 1.00 | 2.00 | 31.00 | 0.00 | 7500.00  | 4500.00 | 409.09  | 2.00 |
| 1.00 | 2.00 | 28.00 | 0.00 | 7900.00  | 5100.00 | 637.50  | 2.00 |
| 1.00 | 1.00 | 19.00 | 0.00 | 7900.00  | 5800.00 | 527.27  | 1.00 |
| 4.00 | 4.00 | 75.00 | 1.00 | 6700.00  | 4200.00 | 1050.00 | 3.00 |
| 1.00 | 2.00 | 31.00 | 0.00 | 7700.00  | 4300.00 | 716.67  | 2.00 |
| 1.00 | 2.00 | 30.00 | 0.00 | 10600.00 | 7600.00 | 345.45  | 2.00 |
| 1.00 | 1.00 | 19.00 | 0.00 | 7300.00  | 4900.00 | 350.00  | 1.00 |
| 2.00 | 3.00 | 44.00 | 1.00 | 5100.00  | 2500.00 | 500.00  | 3.00 |
| 2.00 | 2.00 | 34.00 | 0.00 | 9300.00  | 6700.00 | 279.17  | 2.00 |
| 1.00 | 2.00 | 30.00 | 0.00 | 8900.00  | 6290.00 | 898.57  | 2.00 |
| 1.00 | 2.00 | 31.00 | 0.00 | 7000.00  | 4000.00 | 800.00  | 2.00 |
| 2.00 | 3.00 | 41.00 | 1.00 | 11000.00 | 8320.00 | 346.67  | 3.00 |
| 1.00 | 2.00 | 31.00 | 0.00 | 10400.00 | 7300.00 | 811.11  | 2.00 |
| 1.00 | 1.00 | 21.00 | 0.00 | 6500.00  | 3700.00 | 1233.33 | 1.00 |
| 3.00 | 3.00 | 48.00 | 1.00 | 11100.00 | 8300.00 | 345.83  | 3.00 |
| 1.00 | 2.00 | 24.00 | 0.00 | 10000.00 | 7000.00 | 291.67  | 2.00 |
| 1.00 | 1.00 | 17.00 | 0.00 | 8500.00  | 5800.00 | 1160.00 | 1.00 |
| 2.00 | 3.00 | 39.00 | 1.00 | 7700.00  | 4300.00 | 716.67  | 3.00 |
| 3.00 | 4.00 | 66.00 | 1.00 | 8000.00  | 4900.00 | 816.67  | 3.00 |
| 1.00 | 2.00 | 31.00 | 0.00 | 7900.00  | 5400.00 | 600.00  | 2.00 |
| 2.00 | 3.00 | 36.00 | 1.00 | 8600.00  | 5900.00 | 453.85  | 3.00 |
| 1.00 | 2.00 | 24.00 | 0.00 | 9700.00  | 6400.00 | 266.67  | 2.00 |

|      |      |       |      |          |          |         |      |
|------|------|-------|------|----------|----------|---------|------|
| 1.00 | 1.00 | 18.00 | 0.00 | 6300.00  | 2600.00  | 866.67  | 1.00 |
| 4.00 | 4.00 | 72.00 | 1.00 | 8300.00  | 4600.00  | 920.00  | 3.00 |
| 1.00 | 1.00 | 20.00 | 0.00 | 5100.00  | 1700.00  | 566.67  | 1.00 |
| 1.00 | 2.00 | 26.00 | 0.00 | 6000.00  | 2700.00  | 450.00  | 2.00 |
| 2.00 | 3.00 | 38.00 | 1.00 | 8300.00  | 5800.00  | 414.29  | 3.00 |
| 1.00 | 1.00 | 29.00 | 0.00 | 8600.00  | 6100.00  | 677.78  | 1.00 |
| 1.00 | 2.00 | 25.00 | 0.00 | 9200.00  | 7200.00  | 1200.00 | 2.00 |
| 2.00 | 3.00 | 43.00 | 1.00 | 6900.00  | 4000.00  | 800.00  | 3.00 |
| 1.00 | 2.00 | 31.00 | 0.00 | 8500.00  | 5400.00  | 450.00  | 2.00 |
| 2.00 | 3.00 | 41.00 | 1.00 | 7000.00  | 4000.00  | 1333.33 | 3.00 |
| 1.00 | 2.00 | 32.00 | 0.00 | 8800.00  | 5900.00  | 536.36  | 2.00 |
| 3.00 | 3.00 | 53.00 | 1.00 | 8500.00  | 5900.00  | 327.78  | 3.00 |
| 2.00 | 2.00 | 33.00 | 0.00 | 8700.00  | 5300.00  | 757.14  | 2.00 |
| 2.00 | 2.00 | 33.00 | 0.00 | 8600.00  | 5700.00  | 285.00  | 2.00 |
| 1.00 | 2.00 | 32.00 | 0.00 | 7900.00  | 5200.00  | 433.33  | 2.00 |
| 4.00 | 4.00 | 76.00 | 1.00 | 13900.00 | 11000.00 | 478.26  | 3.00 |
| 3.00 | 4.00 | 65.00 | 1.00 | 8800.00  | 5300.00  | 481.82  | 3.00 |
| 1.00 | 1.00 | 21.00 | 0.00 | 8200.00  | 5200.00  | 1733.33 | 1.00 |
| 2.00 | 3.00 | 44.00 | 1.00 | 7000.00  | 3500.00  | 1750.00 | 3.00 |
| 2.00 | 3.00 | 38.00 | 1.00 | 8700.00  | 5900.00  | 536.36  | 3.00 |
| 1.00 | 2.00 | 32.00 | 0.00 | 9600.00  | 6400.00  | 640.00  | 2.00 |
| 4.00 | 4.00 | 86.00 | 1.00 | 8600.00  | 5500.00  | 423.08  | 3.00 |
| 1.00 | 2.00 | 29.00 | 0.00 | 7400.00  | 3800.00  | 475.00  | 2.00 |
| 1.00 | 1.00 | 23.00 | 0.00 | 5400.00  | 2700.00  | 675.00  | 1.00 |
| 1.00 | 1.00 | 22.00 | 0.00 | 5700.00  | 3100.00  | 1550.00 | 1.00 |
| 1.00 | 2.00 | 26.00 | 0.00 | 7000.00  | 4300.00  | 860.00  | 2.00 |
| 2.00 | 2.00 | 33.00 | 0.00 | 8800.00  | 5800.00  | 527.27  | 2.00 |
| 3.00 | 3.00 | 51.00 | 1.00 | 7700.00  | 4400.00  | 400.00  | 3.00 |
| 1.00 | 2.00 | 30.00 | 0.00 | 6200.00  | 3400.00  | 680.00  | 2.00 |
| 1.00 | 1.00 | 19.00 | 0.00 | 9500.00  | 6900.00  | 300.00  | 1.00 |
| 1.00 | 1.00 | 21.00 | 0.00 | 5500.00  | 2600.00  | 1300.00 | 1.00 |
| 1.00 | 1.00 | 19.00 | 0.00 | 7500.00  | 4300.00  | 860.00  | 1.00 |
| 1.00 | 2.00 | 26.00 | 0.00 | 7200.00  | 3800.00  | 380.00  | 2.00 |
| 2.00 | 3.00 | 44.00 | 1.00 | 9500.00  | 5000.00  | 312.50  | 3.00 |
| 1.00 | 1.00 | 19.00 | 0.00 | 6500.00  | 4500.00  | 562.50  | 1.00 |
| 3.00 | 3.00 | 46.00 | 1.00 | 10200.00 | 6400.00  | 711.11  | 3.00 |
| 2.00 | 2.00 | 33.00 | 0.00 | 9600.00  | 6700.00  | 515.38  | 2.00 |
| 2.00 | 2.00 | 34.00 | 0.00 | 10800.00 | 6400.00  | 581.82  | 2.00 |
| 1.00 | 2.00 | 25.00 | 0.00 | 7700.00  | 5100.00  | 850.00  | 2.00 |
| 2.00 | 3.00 | 44.00 | 1.00 | 11100.00 | 7900.00  | 438.89  | 3.00 |
| 3.00 | 3.00 | 52.00 | 1.00 | 8100.00  | 4700.00  | 427.27  | 3.00 |
| 1.00 | 1.00 | 21.00 | 0.00 | 6100.00  | 3500.00  | 583.33  | 1.00 |
| 3.00 | 3.00 | 45.00 | 1.00 | 7900.00  | 4900.00  | 445.45  | 3.00 |
| 3.00 | 3.00 | 51.00 | 1.00 | 9400.00  | 6900.00  | 627.27  | 3.00 |
| 2.00 | 2.00 | 35.00 | 0.00 | 7200.00  | 3500.00  | 437.50  | 2.00 |
| 1.00 | 1.00 | 20.00 | 0.00 | 6800.00  | 2900.00  | 725.00  | 1.00 |
| 1.00 | 1.00 | 21.00 | 0.00 | 8800.00  | 5900.00  | 737.50  | 1.00 |

|      |      |       |      |          |         |         |      |
|------|------|-------|------|----------|---------|---------|------|
| 3.00 | 3.00 | 50.00 | 1.00 | 9100.00  | 6000.00 | 375.00  | 3.00 |
| 1.00 | 1.00 | 22.00 | 0.00 | 8900.00  | 5800.00 | 1160.00 | 1.00 |
| 1.00 | 2.00 | 32.00 | 0.00 | 8200.00  | 5100.00 | 850.00  | 2.00 |
| 2.00 | 3.00 | 36.00 | 1.00 | 6200.00  | 2500.00 | 416.67  | 3.00 |
| 1.00 | 2.00 | 31.00 | 0.00 | 8400.00  | 4900.00 | 376.92  | 2.00 |
| 3.00 | 3.00 | 48.00 | 1.00 | 10600.00 | 7600.00 | 400.00  | 3.00 |
| 1.00 | 1.00 | 22.00 | 0.00 | 8600.00  | 5700.00 | 438.46  | 1.00 |
| 1.00 | 1.00 | 21.00 | 0.00 | 7500.00  | 4200.00 | 1400.00 | 1.00 |
| 2.00 | 3.00 | 36.00 | 1.00 | 9000.00  | 6500.00 | 406.25  | 3.00 |
| 2.00 | 2.00 | 33.00 | 0.00 | 7600.00  | 4400.00 | 550.00  | 2.00 |
| 1.00 | 2.00 | 32.00 | 0.00 | 9400.00  | 5900.00 | 842.86  | 2.00 |
| 3.00 | 3.00 | 45.00 | 1.00 | 7900.00  | 4800.00 | 960.00  | 3.00 |
| 1.00 | 1.00 | 19.00 | 0.00 | 7000.00  | 4400.00 | 440.00  | 1.00 |
| 1.00 | 1.00 | 19.00 | 0.00 | 9000.00  | 6300.00 | 900.00  | 1.00 |
| 2.00 | 2.00 | 34.00 | 0.00 | 8900.00  | 6000.00 | 461.54  | 2.00 |
| 1.00 | 1.00 | 23.00 | 0.00 | 9700.00  | 6600.00 | 388.24  | 1.00 |
| 3.00 | 4.00 | 67.00 | 1.00 | 7100.00  | 3600.00 | 720.00  | 3.00 |
| 2.00 | 2.00 | 34.00 | 0.00 | 5500.00  | 2400.00 | 800.00  | 2.00 |
| 4.00 | 4.00 | 81.00 | 1.00 | 8300.00  | 5100.00 | 566.67  | 3.00 |
| 2.00 | 2.00 | 33.00 | 0.00 | 7500.00  | 4800.00 | 266.67  | 2.00 |
| 2.00 | 2.00 | 35.00 | 0.00 | 10800.00 | 7400.00 | 672.73  | 2.00 |
| 1.00 | 2.00 | 25.00 | 0.00 | 10400.00 | 7500.00 | 312.50  | 2.00 |
| 2.00 | 2.00 | 33.00 | 0.00 | 9600.00  | 6900.00 | 287.50  | 2.00 |
| 1.00 | 1.00 | 21.00 | 0.00 | 4200.00  | 600.00  | 300.00  | 1.00 |
| 2.00 | 2.00 | 34.00 | 0.00 | 8900.00  | 5800.00 | 644.44  | 2.00 |
| 3.00 | 3.00 | 47.00 | 1.00 | 8900.00  | 5000.00 | 625.00  | 3.00 |
| 3.00 | 3.00 | 46.00 | 1.00 | 5500.00  | 2500.00 | 1250.00 | 3.00 |
| 1.00 | 1.00 | 18.00 | 0.00 | 4100.00  | 1300.00 | 325.00  | 1.00 |
| 3.00 | 3.00 | 52.00 | 1.00 | 5000.00  | 1600.00 | 800.00  | 3.00 |
| 1.00 | 1.00 | 19.00 | 0.00 | 7500.00  | 5200.00 | 1300.00 | 1.00 |
| 2.00 | 2.00 | 34.00 | 0.00 | 9500.00  | 6500.00 | 541.67  | 2.00 |
| 2.00 | 2.00 | 33.00 | 0.00 | 11500.00 | 8600.00 | 1228.57 | 2.00 |
| 1.00 | 1.00 | 21.00 | 0.00 | 6500.00  | 2400.00 | 141.18  | 1.00 |
| 1.00 | 2.00 | 26.00 | 0.00 | 5600.00  | 1900.00 | 475.00  | 2.00 |
| 3.00 | 3.00 | 52.00 | 1.00 | 7000.00  | 3900.00 | 780.00  | 3.00 |
| 2.00 | 2.00 | 34.00 | 0.00 | 9500.00  | 6500.00 | 464.29  | 2.00 |
| 1.00 | 2.00 | 32.00 | 0.00 | 7700.00  | 5100.00 | 1020.00 | 2.00 |
| 1.00 | 1.00 | 19.00 | 0.00 | 6000.00  | 3000.00 | 600.00  | 1.00 |
| 1.00 | 1.00 | 19.00 | 0.00 | 6800.00  | 4500.00 | 1125.00 | 1.00 |
| 2.00 | 2.00 | 34.00 | 0.00 | 6000.00  | 2600.00 | 650.00  | 2.00 |
| 3.00 | 3.00 | 49.00 | 1.00 | 12300.00 | 9300.00 | 404.35  | 3.00 |
| 1.00 | 2.00 | 32.00 | 0.00 | 7300.00  | 3900.00 | 487.50  | 2.00 |
| 4.00 | 4.00 | 85.00 | 1.00 | 9200.00  | 5600.00 | 509.09  | 3.00 |
| 3.00 | 3.00 | 58.00 | 1.00 | 8700.00  | 5700.00 | 633.33  | 3.00 |
| 1.00 | 1.00 | 20.00 | 0.00 | 5500.00  | 2500.00 | 833.33  | 1.00 |
| 2.00 | 2.00 | 34.00 | 0.00 | 10700.00 | 7500.00 | 833.33  | 2.00 |
| 2.00 | 2.00 | 33.00 | 0.00 | 8000.00  | 5200.00 | 650.00  | 2.00 |

|      |      |       |      |          |         |         |      |
|------|------|-------|------|----------|---------|---------|------|
| 3.00 | 3.00 | 45.00 | 1.00 | 8500.00  | 5400.00 | 360.00  | 3.00 |
| 1.00 | 2.00 | 24.00 | 0.00 | 8000.00  | 5000.00 | 416.67  | 2.00 |
| 1.00 | 2.00 | 33.00 | 0.00 | 10000.00 | 6700.00 | 1116.67 | 2.00 |
| 1.00 | 2.00 | 31.00 | 0.00 | 7300.00  | 4600.00 | 255.56  | 2.00 |
| 1.00 | 1.00 | 22.00 | 0.00 | 5500.00  | 2700.00 | 1350.00 | 1.00 |
| 4.00 | 4.00 | 73.00 | 1.00 | 10000.00 | 7200.00 | 313.04  | 3.00 |
| 1.00 | 2.00 | 32.00 | 0.00 | 7400.00  | 4700.00 | 671.43  | 2.00 |
| 2.00 | 3.00 | 36.00 | 1.00 | 9000.00  | 5200.00 | 400.00  | 3.00 |
| 1.00 | 1.00 | 21.00 | 0.00 | 8260.00  | 5860.00 | 651.11  | 1.00 |
| 2.00 | 3.00 | 44.00 | 1.00 | 5100.00  | 1200.00 | 240.00  | 3.00 |
| 1.00 | 2.00 | 32.00 | 0.00 | 7300.00  | 4600.00 | 920.00  | 2.00 |
| 3.00 | 3.00 | 45.00 | 1.00 | 5900.00  | 2800.00 | 1400.00 | 3.00 |
| 2.00 | 2.00 | 34.00 | 0.00 | 9800.00  | 6500.00 | 928.57  | 2.00 |
| 1.00 | 2.00 | 24.00 | 0.00 | 7100.00  | 4900.00 | 445.45  | 2.00 |
| 1.00 | 1.00 | 22.00 | 0.00 | 6800.00  | 3800.00 | 1900.00 | 1.00 |
| 1.00 | 2.00 | 24.00 | 0.00 | 7900.00  | 4700.00 | 391.67  | 2.00 |
| 2.00 | 2.00 | 35.00 | 0.00 | 11900.00 | 8100.00 | 900.00  | 2.00 |
| 2.00 | 2.00 | 35.00 | 0.00 | 8000.00  | 5300.00 | 662.50  | 2.00 |
| 2.00 | 2.00 | 33.00 | 0.00 | 10500.00 | 7600.00 | 1266.67 | 2.00 |
| 1.00 | 2.00 | 29.00 | 0.00 | 6200.00  | 3700.00 | 616.67  | 2.00 |
| 1.00 | 2.00 | 32.00 | 0.00 | 7500.00  | 4400.00 | 550.00  | 2.00 |
| 2.00 | 2.00 | 35.00 | 0.00 | 9200.00  | 6800.00 | 523.08  | 2.00 |
| 2.00 | 2.00 | 33.00 | 0.00 | 8000.00  | 4600.00 | 460.00  | 2.00 |
| 1.00 | 1.00 | 21.00 | 0.00 | 5000.00  | 2600.00 | 866.67  | 1.00 |
| 2.00 | 2.00 | 35.00 | 0.00 | 10300.00 | 6900.00 | 383.33  | 2.00 |
| 1.00 | 1.00 | 18.00 | 0.00 | 6900.00  | 4000.00 | 666.67  | 1.00 |
| 1.00 | 2.00 | 32.00 | 0.00 | 8500.00  | 5800.00 | 644.44  | 2.00 |
| 1.00 | 1.00 | 22.00 | 0.00 | 5200.00  | 1800.00 | 900.00  | 1.00 |
| 3.00 | 3.00 | 47.00 | 1.00 | 7300.00  | 3900.00 | 780.00  | 3.00 |
| 2.00 | 3.00 | 43.00 | 1.00 | 9900.00  | 6800.00 | 323.81  | 3.00 |
| 1.00 | 1.00 | 23.00 | 0.00 | 9900.00  | 7200.00 | 1028.57 | 1.00 |
| 2.00 | 2.00 | 33.00 | 0.00 | 9900.00  | 6900.00 | 460.00  | 2.00 |
| 3.00 | 3.00 | 46.00 | 1.00 | 6800.00  | 3500.00 | 1750.00 | 3.00 |
| 1.00 | 2.00 | 27.00 | 0.00 | 10100.00 | 6900.00 | 313.64  | 2.00 |
| 1.00 | 1.00 | 18.00 | 0.00 | 6900.00  | 4200.00 | 1050.00 | 1.00 |
| 1.00 | 1.00 | 19.00 | 0.00 | 6900.00  | 3900.00 | 975.00  | 1.00 |
| 2.00 | 3.00 | 36.00 | 1.00 | 12400.00 | 9300.00 | 387.50  | 3.00 |
| 1.00 | 2.00 | 31.00 | 0.00 | 6000.00  | 3300.00 | 1650.00 | 2.00 |
| 4.00 | 4.00 | 75.00 | 1.00 | 6700.00  | 4200.00 | 1050.00 | 3.00 |
| 1.00 | 1.00 | 21.00 | 0.00 | 4200.00  | 1300.00 | 650.00  | 1.00 |
| 3.00 | 4.00 | 68.00 | 1.00 | 12100.00 | 9100.00 | 379.17  | 3.00 |
| 1.00 | 2.00 | 31.00 | 0.00 | 8600.00  | 5800.00 | 725.00  | 2.00 |
| 2.00 | 2.00 | 33.00 | 0.00 | 7700.00  | 4300.00 | 537.50  | 2.00 |
| 2.00 | 3.00 | 44.00 | 1.00 | 9200.00  | 7100.00 | 338.10  | 3.00 |
| 3.00 | 3.00 | 51.00 | 1.00 | 6400.00  | 3800.00 | 542.86  | 3.00 |
| 1.00 | 2.00 | 31.00 | 0.00 | 7100.00  | 5100.00 | 392.31  | 2.00 |
| 3.00 | 3.00 | 47.00 | 1.00 | 7100.00  | 4600.00 | 575.00  | 3.00 |

|      |      |       |      |          |          |         |      |
|------|------|-------|------|----------|----------|---------|------|
| 2.00 | 2.00 | 33.00 | 0.00 | 10000.00 | 6800.00  | 680.00  | 2.00 |
| 1.00 | 2.00 | 25.00 | 0.00 | 8000.00  | 5300.00  | 407.69  | 2.00 |
| 2.00 | 2.00 | 33.00 | 0.00 | 9600.00  | 6400.00  | 581.82  | 2.00 |
| 1.00 | 2.00 | 29.00 | 0.00 | 9800.00  | 6300.00  | 572.73  | 2.00 |
| 2.00 | 3.00 | 38.00 | 1.00 | 7200.00  | 4300.00  | 330.77  | 3.00 |
| 1.00 | 1.00 | 20.00 | 0.00 | 5100.00  | 2600.00  | 866.67  | 1.00 |
| 1.00 | 2.00 | 31.00 | 0.00 | 7500.00  | 4700.00  | 522.22  | 2.00 |
| 4.00 | 4.00 | 70.00 | 1.00 | 9000.00  | 5700.00  | 407.14  | 3.00 |
| 1.00 | 1.00 | 19.00 | 0.00 | 7000.00  | 4400.00  | 880.00  | 1.00 |
| 1.00 | 2.00 | 32.00 | 0.00 | 9000.00  | 5700.00  | 814.29  | 2.00 |
| 1.00 | 2.00 | 28.00 | 0.00 | 10200.00 | 7000.00  | 538.46  | 2.00 |
| 1.00 | 2.00 | 26.00 | 0.00 | 8200.00  | 5000.00  | 500.00  | 2.00 |
| 1.00 | 2.00 | 31.00 | 0.00 | 9200.00  | 6100.00  | 610.00  | 2.00 |
| 1.00 | 2.00 | 31.00 | 0.00 | 10500.00 | 8000.00  | 888.89  | 2.00 |
| 2.00 | 3.00 | 36.00 | 1.00 | 6600.00  | 4100.00  | 1366.67 | 3.00 |
| 2.00 | 3.00 | 43.00 | 1.00 | 8200.00  | 4900.00  | 700.00  | 3.00 |
| 3.00 | 4.00 | 61.00 | 1.00 | 7100.00  | 3800.00  | 760.00  | 3.00 |
| 2.00 | 2.00 | 34.00 | 0.00 | 9300.00  | 6100.00  | 554.55  | 2.00 |
| 1.00 | 1.00 | 19.00 | 0.00 | 6600.00  | 3600.00  | 720.00  | 1.00 |
| 4.00 | 4.00 | 70.00 | 1.00 | 7400.00  | 4000.00  | 1333.33 | 3.00 |
| 1.00 | 1.00 | 21.00 | 0.00 | 10600.00 | 7700.00  | 855.56  | 1.00 |
| 3.00 | 3.00 | 45.00 | 1.00 | 7400.00  | 4400.00  | 220.00  | 3.00 |
| 1.00 | 2.00 | 30.00 | 0.00 | 9500.00  | 6200.00  | 344.44  | 2.00 |
| 1.00 | 1.00 | 22.00 | 0.00 | 6100.00  | 3000.00  | 1500.00 | 1.00 |
| 1.00 | 2.00 | 31.00 | 0.00 | 5500.00  | 2200.00  | 550.00  | 2.00 |
| 1.00 | 1.00 | 18.00 | 0.00 | 8500.00  | 6500.00  | 1625.00 | 1.00 |
| 2.00 | 2.00 | 33.00 | 0.00 | 7700.00  | 4300.00  | 477.78  | 2.00 |
| 3.00 | 4.00 | 61.00 | 1.00 | 5500.00  | 2300.00  | 766.67  | 3.00 |
| 3.00 | 4.00 | 62.00 | 1.00 | 11300.00 | 8300.00  | 345.83  | 3.00 |
| 1.00 | 1.00 | 20.00 | 0.00 | 6000.00  | 3000.00  | 1500.00 | 1.00 |
| 1.00 | 2.00 | 25.00 | 0.00 | 9100.00  | 6300.00  | 900.00  | 2.00 |
| 3.00 | 3.00 | 55.00 | 1.00 | 10100.00 | 7800.00  | 325.00  | 3.00 |
| 3.00 | 3.00 | 49.00 | 1.00 | 11200.00 | 8200.00  | 341.67  | 3.00 |
| 1.00 | 2.00 | 31.00 | 0.00 | 10100.00 | 7300.00  | 663.64  | 2.00 |
| 2.00 | 3.00 | 36.00 | 1.00 | 13200.00 | 10200.00 | 425.00  | 3.00 |
| 2.00 | 3.00 | 41.00 | 1.00 | 9500.00  | 6400.00  | 533.33  | 3.00 |
| 1.00 | 1.00 | 21.00 | 0.00 | 7100.00  | 4500.00  | 500.00  | 1.00 |
| 3.00 | 3.00 | 53.00 | 1.00 | 7700.00  | 4600.00  | 353.85  | 3.00 |
| 1.00 | 1.00 | 20.00 | 0.00 | 4700.00  | 1800.00  | 600.00  | 1.00 |
| 4.00 | 4.00 | 71.00 | 1.00 | 12900.00 | 10000.00 | 476.19  | 3.00 |
| 1.00 | 2.00 | 31.00 | 0.00 | 11300.00 | 8500.00  | 944.44  | 2.00 |
| 1.00 | 2.00 | 31.00 | 0.00 | 8400.00  | 5600.00  | 933.33  | 2.00 |
| 3.00 | 4.00 | 61.00 | 1.00 | 11500.00 | 8100.00  | 352.17  | 3.00 |
| 1.00 | 1.00 | 20.00 | 0.00 | 5800.00  | 3300.00  | 825.00  | 1.00 |
| 4.00 | 4.00 | 70.00 | 1.00 | 4500.00  | 1300.00  | 650.00  | 3.00 |
| 1.00 | 1.00 | 19.00 | 0.00 | 6400.00  | 3900.00  | 780.00  | 1.00 |
| 3.00 | 3.00 | 50.00 | 1.00 | 13500.00 | 10700.00 | 486.36  | 3.00 |

|      |      |       |      |          |          |         |      |
|------|------|-------|------|----------|----------|---------|------|
| 3.00 | 3.00 | 59.00 | 1.00 | 10500.00 | 7300.00  | 304.17  | 3.00 |
| 1.00 | 1.00 | 21.00 | 0.00 | 9800.00  | 7100.00  | 887.50  | 1.00 |
| 1.00 | 2.00 | 32.00 | 0.00 | 7500.00  | 4400.00  | 628.57  | 2.00 |
| 1.00 | 1.00 | 38.00 | 0.00 | 8900.00  | 6100.00  | 1525.00 | 1.00 |
| 4.00 | 4.00 | 72.00 | 1.00 | 12400.00 | 9900.00  | 412.50  | 3.00 |
| 1.00 | 1.00 | 21.00 | 0.00 | 8500.00  | 5800.00  | 527.27  | 1.00 |
| 3.00 | 4.00 | 68.00 | 1.00 | 9800.00  | 7100.00  | 507.14  | 3.00 |
| 1.00 | 2.00 | 31.00 | 0.00 | 8200.00  | 5500.00  | 550.00  | 2.00 |
| 3.00 | 3.00 | 54.00 | 1.00 | 9100.00  | 6100.00  | 305.00  | 3.00 |
| 2.00 | 2.00 | 33.00 | 0.00 | 7100.00  | 4100.00  | 512.50  | 2.00 |
| 3.00 | 3.00 | 48.00 | 1.00 | 13500.00 | 10500.00 | 456.52  | 3.00 |
| 1.00 | 1.00 | 18.00 | 0.00 | 6700.00  | 3900.00  | 780.00  | 1.00 |
| 2.00 | 2.00 | 33.00 | 0.00 | 9100.00  | 5600.00  | 622.22  | 2.00 |
| 4.00 | 4.00 | 75.00 | 1.00 | 8200.00  | 5600.00  | 1120.00 | 3.00 |
| 1.00 | 1.00 | 21.00 | 0.00 | 5900.00  | 2500.00  | 833.33  | 1.00 |
| 2.00 | 3.00 | 38.00 | 1.00 | 10500.00 | 7400.00  | 308.33  | 3.00 |
| 1.00 | 1.00 | 19.00 | 0.00 | 10100.00 | 7600.00  | 690.91  | 1.00 |
| 2.00 | 2.00 | 35.00 | 0.00 | 4800.00  | 1800.00  | 900.00  | 2.00 |
| 2.00 | 3.00 | 40.00 | 1.00 | 7000.00  | 3800.00  | 633.33  | 3.00 |
| 2.00 | 2.00 | 33.00 | 0.00 | 12000.00 | 9000.00  | 1000.00 | 2.00 |
| 1.00 | 1.00 | 19.00 | 0.00 | 7700.00  | 4500.00  | 1125.00 | 1.00 |
| 3.00 | 3.00 | 48.00 | 1.00 | 11800.00 | 7800.00  | 325.00  | 3.00 |
| 3.00 | 4.00 | 65.00 | 1.00 | 10000.00 | 7400.00  | 321.74  | 3.00 |
| 1.00 | 1.00 | 21.00 | 0.00 | 8000.00  | 5500.00  | 916.67  | 1.00 |
| 2.00 | 3.00 | 41.00 | 1.00 | 12500.00 | 9700.00  | 461.90  | 3.00 |
| 1.00 | 1.00 | 19.00 | 0.00 | 8600.00  | 6300.00  | 525.00  | 1.00 |
| 1.00 | 2.00 | 28.00 | 0.00 | 8000.00  | 5100.00  | 425.00  | 2.00 |
| 1.00 | 2.00 | 25.00 | 0.00 | 7400.00  | 4900.00  | 445.45  | 2.00 |
| 2.00 | 2.00 | 34.00 | 0.00 | 8800.00  | 5300.00  | 757.14  | 2.00 |
| 1.00 | 1.00 | 23.00 | 0.00 | 15400.00 | 12400.00 | 590.48  | 1.00 |
| 1.00 | 2.00 | 31.00 | 0.00 | 8400.00  | 5700.00  | 438.46  | 2.00 |
| 2.00 | 2.00 | 33.00 | 0.00 | 8500.00  | 5500.00  | 687.50  | 2.00 |
| 2.00 | 3.00 | 43.00 | 1.00 | 11700.00 | 7700.00  | 427.78  | 3.00 |
| 2.00 | 2.00 | 34.00 | 0.00 | 8500.00  | 5300.00  | 588.89  | 2.00 |
| 1.00 | 1.00 | 20.00 | 0.00 | 6000.00  | 3200.00  | 800.00  | 1.00 |
| 2.00 | 3.00 | 44.00 | 1.00 | 6700.00  | 3800.00  | 1266.67 | 3.00 |
| 2.00 | 3.00 | 40.00 | 1.00 | 6200.00  | 3800.00  | 1266.67 | 3.00 |
| 1.00 | 1.00 | 21.00 | 0.00 | 9000.00  | 6800.00  | 566.67  | 1.00 |
| 3.00 | 3.00 | 54.00 | 1.00 | 12600.00 | 9600.00  | 533.33  | 3.00 |
| 1.00 | 2.00 | 27.00 | 0.00 | 5800.00  | 3000.00  | 750.00  | 2.00 |
| 3.00 | 3.00 | 47.00 | 1.00 | 5300.00  | 1800.00  | 900.00  | 3.00 |
| 1.00 | 1.00 | 18.00 | 0.00 | 6400.00  | 3700.00  | 616.67  | 1.00 |
| 1.00 | 1.00 | 23.00 | 0.00 | 7100.00  | 4300.00  | 1433.33 | 1.00 |
| 2.00 | 2.00 | 23.00 | 0.00 | 7000.00  | 4000.00  | 571.43  | 2.00 |
| 1.00 | 1.00 | 20.00 | 0.00 | 5600.00  | 2900.00  | 966.67  | 1.00 |
| 1.00 | 1.00 | 19.00 | 0.00 | 6700.00  | 3700.00  | 1233.33 | 1.00 |
| 3.00 | 3.00 | 54.00 | 1.00 | 6400.00  | 3200.00  | 400.00  | 3.00 |

|      |      |       |      |         |         |         |      |
|------|------|-------|------|---------|---------|---------|------|
| 1.00 | 1.00 | 18.00 | 0.00 | 6800.00 | 3500.00 | 875.00  | 1.00 |
| 1.00 | 2.00 | 32.00 | 0.00 | 6700.00 | 4300.00 | 1075.00 | 2.00 |
| 2.00 | 2.00 | 33.00 | 0.00 | 4500.00 | 1400.00 | 280.00  | 2.00 |
| 3.00 | 3.00 | 50.00 | 1.00 | 4600.00 | 1300.00 | 433.33  | 3.00 |
| 2.00 | 2.00 | 33.00 | 0.00 | 7800.00 | 4500.00 | 375.00  | 2.00 |
| 2.00 | 3.00 | 36.00 | 1.00 | 9000.00 | 6000.00 | 333.33  | 3.00 |
| 1.00 | 1.00 | 29.00 | 0.00 | 7600.00 | 5500.00 | 611.11  | 1.00 |
| 3.00 | 3.00 | 46.00 | 1.00 | 7300.00 | 4600.00 | 511.11  | 3.00 |
| 2.00 | 2.00 | 33.00 | 0.00 | 9200.00 | 6200.00 | 1240.00 | 2.00 |
| 3.00 | 3.00 | 54.00 | 1.00 | 8900.00 | 6400.00 | 800.00  | 3.00 |
| 3.00 | 4.00 | 61.00 | 1.00 | 5300.00 | 2100.00 | 1050.00 | 3.00 |
| 1.00 | 1.00 | 20.00 | 0.00 | 6500.00 | 3700.00 | 1233.33 | 1.00 |
| 1.00 | 1.00 | 21.00 | 0.00 | 6300.00 | 3300.00 | 1100.00 | 1.00 |
| 3.00 | 3.00 | 46.00 | 1.00 | 7600.00 | 4200.00 | 840.00  | 3.00 |
